# Supplementary material for: MPDenoiseNet: Resource-Efficient Deep Learning Approach for Image Denoising
Source: Research Square preprint supplement (doi:10.21203/rs.3.rs-6641644/v1), 2025-05-20
Supplement: Supplementary file 1 [file ablation_5_transformers.xlsx]

## Sheet: Sheet1
noise_type	dataset	im_index	noise_parameter	SSIM	PSNR
BERNOULLI	Kodak24	kodim24	150	0.917237	27.6971
BERNOULLI	Kodak24	kodim24	160	0.905008	27.2266
BERNOULLI	Kodak24	kodim24	170	0.892019	26.7551
BERNOULLI	Kodak24	kodim24	180	0.874979	26.2164
BERNOULLI	Kodak24	kodim24	190	0.855809	25.6127
BERNOULLI	Kodak24	kodim24	200	0.830094	25.0149
BERNOULLI	Kodak24	kodim24	210	0.801161	24.3674
BERNOULLI	Kodak24	kodim24	220	0.763331	23.6996
BERNOULLI	Kodak24	kodim24	230	0.714131	22.9312
BERNOULLI	Kodak24	kodim24	240	0.635557	21.8648
BERNOULLI	Kodak24	kodim15	150	0.936388	31.3921
BERNOULLI	Kodak24	kodim15	160	0.930149	31.195
BERNOULLI	Kodak24	kodim15	170	0.921127	30.9609
BERNOULLI	Kodak24	kodim15	180	0.912647	30.6204
BERNOULLI	Kodak24	kodim15	190	0.899797	30.276
BERNOULLI	Kodak24	kodim15	200	0.887896	29.7805
BERNOULLI	Kodak24	kodim15	210	0.872538	29.4102
BERNOULLI	Kodak24	kodim15	220	0.854334	28.8724
BERNOULLI	Kodak24	kodim15	230	0.826883	28.0195
BERNOULLI	Kodak24	kodim15	240	0.790611	26.6993
BERNOULLI	Kodak24	kodim17	150	0.95209	33.6913
BERNOULLI	Kodak24	kodim17	160	0.945728	32.9624
BERNOULLI	Kodak24	kodim17	170	0.938915	32.4741
BERNOULLI	Kodak24	kodim17	180	0.93004	31.7409
BERNOULLI	Kodak24	kodim17	190	0.91954	31.148
BERNOULLI	Kodak24	kodim17	200	0.90628	30.4019
BERNOULLI	Kodak24	kodim17	210	0.890821	29.7984
BERNOULLI	Kodak24	kodim17	220	0.86827	28.8512
BERNOULLI	Kodak24	kodim17	230	0.837383	27.8071
BERNOULLI	Kodak24	kodim17	240	0.783131	26.47
BERNOULLI	Kodak24	kodim03	150	0.9629	32.759
BERNOULLI	Kodak24	kodim03	160	0.957792	32.5166
BERNOULLI	Kodak24	kodim03	170	0.952054	32.287
BERNOULLI	Kodak24	kodim03	180	0.944622	32.0527
BERNOULLI	Kodak24	kodim03	190	0.933983	31.4857
BERNOULLI	Kodak24	kodim03	200	0.922025	31.1479
BERNOULLI	Kodak24	kodim03	210	0.906163	30.6209
BERNOULLI	Kodak24	kodim03	220	0.887949	30.0344
BERNOULLI	Kodak24	kodim03	230	0.86282	29.3144
BERNOULLI	Kodak24	kodim03	240	0.827356	28.377
BERNOULLI	Kodak24	kodim06	150	0.914845	28.7914
BERNOULLI	Kodak24	kodim06	160	0.900371	28.2755
BERNOULLI	Kodak24	kodim06	170	0.885701	27.8701
BERNOULLI	Kodak24	kodim06	180	0.868647	27.3856
BERNOULLI	Kodak24	kodim06	190	0.848487	26.8874
BERNOULLI	Kodak24	kodim06	200	0.824259	26.3264
BERNOULLI	Kodak24	kodim06	210	0.79137	25.7218
BERNOULLI	Kodak24	kodim06	220	0.750846	24.9491
BERNOULLI	Kodak24	kodim06	230	0.70264	24.1443
BERNOULLI	Kodak24	kodim06	240	0.620594	23.0934
BERNOULLI	Kodak24	kodim02	150	0.919194	31.7207
BERNOULLI	Kodak24	kodim02	160	0.909965	31.5866
BERNOULLI	Kodak24	kodim02	170	0.898074	31.3159
BERNOULLI	Kodak24	kodim02	180	0.887447	31.0885
BERNOULLI	Kodak24	kodim02	190	0.872316	30.7824
BERNOULLI	Kodak24	kodim02	200	0.856448	30.4413
BERNOULLI	Kodak24	kodim02	210	0.839066	30.1395
BERNOULLI	Kodak24	kodim02	220	0.817765	29.7518
BERNOULLI	Kodak24	kodim02	230	0.784837	29.1796
BERNOULLI	Kodak24	kodim02	240	0.74478	28.4787
BERNOULLI	Kodak24	kodim14	150	0.911302	29.1821
BERNOULLI	Kodak24	kodim14	160	0.89935	28.8303
BERNOULLI	Kodak24	kodim14	170	0.883385	28.3615
BERNOULLI	Kodak24	kodim14	180	0.863805	27.8103
BERNOULLI	Kodak24	kodim14	190	0.844329	27.339
BERNOULLI	Kodak24	kodim14	200	0.816852	26.6237
BERNOULLI	Kodak24	kodim14	210	0.784279	25.9741
BERNOULLI	Kodak24	kodim14	220	0.743254	25.1416
BERNOULLI	Kodak24	kodim14	230	0.690934	24.3495
BERNOULLI	Kodak24	kodim14	240	0.612416	23.14
BERNOULLI	Kodak24	kodim07	150	0.972115	32.7502
BERNOULLI	Kodak24	kodim07	160	0.968558	32.4169
BERNOULLI	Kodak24	kodim07	170	0.963981	32.0238
BERNOULLI	Kodak24	kodim07	180	0.958197	31.5148
BERNOULLI	Kodak24	kodim07	190	0.951112	31.0579
BERNOULLI	Kodak24	kodim07	200	0.940596	30.3371
BERNOULLI	Kodak24	kodim07	210	0.928982	29.5502
BERNOULLI	Kodak24	kodim07	220	0.912161	28.7461
BERNOULLI	Kodak24	kodim07	230	0.883519	27.4835
BERNOULLI	Kodak24	kodim07	240	0.827804	25.8653
BERNOULLI	Kodak24	kodim20	150	0.945394	31.7545
BERNOULLI	Kodak24	kodim20	160	0.938505	31.2002
BERNOULLI	Kodak24	kodim20	170	0.931087	30.8391
BERNOULLI	Kodak24	kodim20	180	0.921885	30.3268
BERNOULLI	Kodak24	kodim20	190	0.911491	29.6438
BERNOULLI	Kodak24	kodim20	200	0.901372	29.2065
BERNOULLI	Kodak24	kodim20	210	0.887708	28.3713
BERNOULLI	Kodak24	kodim20	220	0.871418	27.6129
BERNOULLI	Kodak24	kodim20	230	0.850063	26.7167
BERNOULLI	Kodak24	kodim20	240	0.816317	25.0992
BERNOULLI	Kodak24	kodim11	150	0.922277	29.9343
BERNOULLI	Kodak24	kodim11	160	0.910565	29.491
BERNOULLI	Kodak24	kodim11	170	0.897673	29.0043
BERNOULLI	Kodak24	kodim11	180	0.881963	28.5145
BERNOULLI	Kodak24	kodim11	190	0.864265	27.9271
BERNOULLI	Kodak24	kodim11	200	0.842456	27.3869
BERNOULLI	Kodak24	kodim11	210	0.816028	26.7378
BERNOULLI	Kodak24	kodim11	220	0.782215	25.9827
BERNOULLI	Kodak24	kodim11	230	0.736427	25.2188
BERNOULLI	Kodak24	kodim11	240	0.665259	23.9139
BERNOULLI	Kodak24	kodim12	150	0.944478	33.1764
BERNOULLI	Kodak24	kodim12	160	0.936651	32.761
BERNOULLI	Kodak24	kodim12	170	0.928311	32.378
BERNOULLI	Kodak24	kodim12	180	0.918589	31.9883
BERNOULLI	Kodak24	kodim12	190	0.907017	31.4882
BERNOULLI	Kodak24	kodim12	200	0.893913	30.7931
BERNOULLI	Kodak24	kodim12	210	0.876946	30.1654
BERNOULLI	Kodak24	kodim12	220	0.855644	29.349
BERNOULLI	Kodak24	kodim12	230	0.82686	28.4722
BERNOULLI	Kodak24	kodim12	240	0.786741	27.0392
BERNOULLI	Kodak24	kodim09	150	0.950605	32.5189
BERNOULLI	Kodak24	kodim09	160	0.946016	32.1963
BERNOULLI	Kodak24	kodim09	170	0.940038	31.8435
BERNOULLI	Kodak24	kodim09	180	0.932196	31.2927
BERNOULLI	Kodak24	kodim09	190	0.923722	30.8035
BERNOULLI	Kodak24	kodim09	200	0.913494	30.2818
BERNOULLI	Kodak24	kodim09	210	0.899098	29.5945
BERNOULLI	Kodak24	kodim09	220	0.87926	28.574
BERNOULLI	Kodak24	kodim09	230	0.854673	27.5623
BERNOULLI	Kodak24	kodim09	240	0.814233	26.2498
BERNOULLI	Kodak24	kodim01	150	0.881902	27.7077
BERNOULLI	Kodak24	kodim01	160	0.866612	27.2716
BERNOULLI	Kodak24	kodim01	170	0.84705	26.7871
BERNOULLI	Kodak24	kodim01	180	0.824396	26.2926
BERNOULLI	Kodak24	kodim01	190	0.800011	25.7516
BERNOULLI	Kodak24	kodim01	200	0.771018	25.1663
BERNOULLI	Kodak24	kodim01	210	0.738467	24.6487
BERNOULLI	Kodak24	kodim01	220	0.692958	23.8877
BERNOULLI	Kodak24	kodim01	230	0.634264	23.0386
BERNOULLI	Kodak24	kodim01	240	0.54872	21.8715
BERNOULLI	Kodak24	kodim04	150	0.931902	32.1923
BERNOULLI	Kodak24	kodim04	160	0.922386	31.8662
BERNOULLI	Kodak24	kodim04	170	0.911642	31.5229
BERNOULLI	Kodak24	kodim04	180	0.900025	31.2696
BERNOULLI	Kodak24	kodim04	190	0.888232	30.9172
BERNOULLI	Kodak24	kodim04	200	0.871831	30.3909
BERNOULLI	Kodak24	kodim04	210	0.852442	29.8989
BERNOULLI	Kodak24	kodim04	220	0.826042	29.203
BERNOULLI	Kodak24	kodim04	230	0.796122	28.4205
BERNOULLI	Kodak24	kodim04	240	0.751645	27.2622
BERNOULLI	Kodak24	kodim23	150	0.967842	33.1064
BERNOULLI	Kodak24	kodim23	160	0.96452	33.1065
BERNOULLI	Kodak24	kodim23	170	0.960797	32.7829
BERNOULLI	Kodak24	kodim23	180	0.956076	32.3169
BERNOULLI	Kodak24	kodim23	190	0.950215	31.9404
BERNOULLI	Kodak24	kodim23	200	0.943993	31.4145
BERNOULLI	Kodak24	kodim23	210	0.934855	30.8305
BERNOULLI	Kodak24	kodim23	220	0.922391	30.0551
BERNOULLI	Kodak24	kodim23	230	0.905073	29.1279
BERNOULLI	Kodak24	kodim23	240	0.875095	27.7444
BERNOULLI	Kodak24	kodim22	150	0.913298	30.9795
BERNOULLI	Kodak24	kodim22	160	0.9018	30.5709
BERNOULLI	Kodak24	kodim22	170	0.887731	30.1086
BERNOULLI	Kodak24	kodim22	180	0.870883	29.6109
BERNOULLI	Kodak24	kodim22	190	0.851086	29.0105
BERNOULLI	Kodak24	kodim22	200	0.830111	28.5366
BERNOULLI	Kodak24	kodim22	210	0.803732	27.9604
BERNOULLI	Kodak24	kodim22	220	0.77095	27.3818
BERNOULLI	Kodak24	kodim22	230	0.72593	26.4294
BERNOULLI	Kodak24	kodim22	240	0.665791	25.4336
BERNOULLI	Kodak24	kodim05	150	0.935221	28.2426
BERNOULLI	Kodak24	kodim05	160	0.922043	27.5941
BERNOULLI	Kodak24	kodim05	170	0.907014	26.9629
BERNOULLI	Kodak24	kodim05	180	0.88876	26.2321
BERNOULLI	Kodak24	kodim05	190	0.866067	25.515
BERNOULLI	Kodak24	kodim05	200	0.83885	24.7131
BERNOULLI	Kodak24	kodim05	210	0.799626	23.8923
BERNOULLI	Kodak24	kodim05	220	0.754019	22.9552
BERNOULLI	Kodak24	kodim05	230	0.690791	21.9481
BERNOULLI	Kodak24	kodim05	240	0.592208	20.5918
BERNOULLI	Kodak24	kodim13	150	0.829979	24.3504
BERNOULLI	Kodak24	kodim13	160	0.805572	23.8313
BERNOULLI	Kodak24	kodim13	170	0.780433	23.3814
BERNOULLI	Kodak24	kodim13	180	0.751275	22.8501
BERNOULLI	Kodak24	kodim13	190	0.715573	22.3246
BERNOULLI	Kodak24	kodim13	200	0.675907	21.892
BERNOULLI	Kodak24	kodim13	210	0.631613	21.3029
BERNOULLI	Kodak24	kodim13	220	0.577054	20.7662
BERNOULLI	Kodak24	kodim13	230	0.510865	20.0784
BERNOULLI	Kodak24	kodim13	240	0.422599	19.3232
BERNOULLI	Kodak24	kodim18	150	0.906333	28.7845
BERNOULLI	Kodak24	kodim18	160	0.892557	28.3101
BERNOULLI	Kodak24	kodim18	170	0.877173	27.7531
BERNOULLI	Kodak24	kodim18	180	0.858378	27.1175
BERNOULLI	Kodak24	kodim18	190	0.835634	26.5355
BERNOULLI	Kodak24	kodim18	200	0.810422	26.0342
BERNOULLI	Kodak24	kodim18	210	0.777164	25.2353
BERNOULLI	Kodak24	kodim18	220	0.73573	24.5576
BERNOULLI	Kodak24	kodim18	230	0.681914	23.8307
BERNOULLI	Kodak24	kodim18	240	0.601658	22.722
BERNOULLI	Kodak24	kodim10	150	0.955614	32.5747
BERNOULLI	Kodak24	kodim10	160	0.950032	32.2304
BERNOULLI	Kodak24	kodim10	170	0.943105	31.5131
BERNOULLI	Kodak24	kodim10	180	0.935369	30.9064
BERNOULLI	Kodak24	kodim10	190	0.926911	30.6697
BERNOULLI	Kodak24	kodim10	200	0.913713	29.5815
BERNOULLI	Kodak24	kodim10	210	0.899193	29.1519
BERNOULLI	Kodak24	kodim10	220	0.876892	28.3429
BERNOULLI	Kodak24	kodim10	230	0.842565	27.5533
BERNOULLI	Kodak24	kodim10	240	0.790921	25.8371
BERNOULLI	Kodak24	kodim08	150	0.917874	26.8414
BERNOULLI	Kodak24	kodim08	160	0.905901	26.2529
BERNOULLI	Kodak24	kodim08	170	0.891964	25.6238
BERNOULLI	Kodak24	kodim08	180	0.876491	25.1111
BERNOULLI	Kodak24	kodim08	190	0.85777	24.4155
BERNOULLI	Kodak24	kodim08	200	0.832622	23.6193
BERNOULLI	Kodak24	kodim08	210	0.799315	22.7476
BERNOULLI	Kodak24	kodim08	220	0.754616	21.6768
BERNOULLI	Kodak24	kodim08	230	0.688596	20.4919
BERNOULLI	Kodak24	kodim08	240	0.596426	18.9295
BERNOULLI	Kodak24	kodim19	150	0.922423	32.6478
BERNOULLI	Kodak24	kodim19	160	0.912933	31.8576
BERNOULLI	Kodak24	kodim19	170	0.90045	31.1579
BERNOULLI	Kodak24	kodim19	180	0.886949	30.5874
BERNOULLI	Kodak24	kodim19	190	0.871477	29.7285
BERNOULLI	Kodak24	kodim19	200	0.852713	28.9157
BERNOULLI	Kodak24	kodim19	210	0.830977	28.0687
BERNOULLI	Kodak24	kodim19	220	0.803329	27.1201
BERNOULLI	Kodak24	kodim19	230	0.765099	25.7178
BERNOULLI	Kodak24	kodim19	240	0.701834	23.9634
BERNOULLI	Kodak24	kodim16	150	0.933083	31.0054
BERNOULLI	Kodak24	kodim16	160	0.922876	30.6091
BERNOULLI	Kodak24	kodim16	170	0.910828	30.303
BERNOULLI	Kodak24	kodim16	180	0.900209	30.0959
BERNOULLI	Kodak24	kodim16	190	0.883315	29.6333
BERNOULLI	Kodak24	kodim16	200	0.86317	29.2161
BERNOULLI	Kodak24	kodim16	210	0.838557	28.7191
BERNOULLI	Kodak24	kodim16	220	0.807827	28.2039
BERNOULLI	Kodak24	kodim16	230	0.77206	27.6702
BERNOULLI	Kodak24	kodim16	240	0.711903	26.8506
BERNOULLI	Kodak24	kodim21	150	0.925657	29.1974
BERNOULLI	Kodak24	kodim21	160	0.915689	28.6121
BERNOULLI	Kodak24	kodim21	170	0.905207	28.2349
BERNOULLI	Kodak24	kodim21	180	0.891626	27.6628
BERNOULLI	Kodak24	kodim21	190	0.875724	27.0694
BERNOULLI	Kodak24	kodim21	200	0.858153	26.4557
BERNOULLI	Kodak24	kodim21	210	0.83592	25.8063
BERNOULLI	Kodak24	kodim21	220	0.809398	25.049
BERNOULLI	Kodak24	kodim21	230	0.769426	24.208
BERNOULLI	Kodak24	kodim21	240	0.714666	23.204
BERNOULLI	BSD68	16	150	0.934764	30.5666
BERNOULLI	BSD68	16	160	0.92355	30.1089
BERNOULLI	BSD68	16	170	0.913619	29.3035
BERNOULLI	BSD68	16	180	0.89898	28.6305
BERNOULLI	BSD68	16	190	0.883464	28.1275
BERNOULLI	BSD68	16	200	0.864649	27.1508
BERNOULLI	BSD68	16	210	0.840546	26.3746
BERNOULLI	BSD68	16	220	0.81441	25.7464
BERNOULLI	BSD68	16	230	0.774102	24.7579
BERNOULLI	BSD68	16	240	0.703389	23.1756
BERNOULLI	BSD68	62	150	0.906742	31.1343
BERNOULLI	BSD68	62	160	0.893562	30.4381
BERNOULLI	BSD68	62	170	0.880023	29.9978
BERNOULLI	BSD68	62	180	0.863322	29.3303
BERNOULLI	BSD68	62	190	0.847297	28.7714
BERNOULLI	BSD68	62	200	0.825661	28.2379
BERNOULLI	BSD68	62	210	0.805954	27.8001
BERNOULLI	BSD68	62	220	0.777881	26.9989
BERNOULLI	BSD68	62	230	0.745688	26.084
BERNOULLI	BSD68	62	240	0.702463	24.9864
BERNOULLI	BSD68	46	150	0.907166	27.7431
BERNOULLI	BSD68	46	160	0.895118	27.3051
BERNOULLI	BSD68	46	170	0.875533	26.5168
BERNOULLI	BSD68	46	180	0.859328	25.973
BERNOULLI	BSD68	46	190	0.832959	25.3195
BERNOULLI	BSD68	46	200	0.803001	24.5584
BERNOULLI	BSD68	46	210	0.765089	23.9217
BERNOULLI	BSD68	46	220	0.71974	23.1083
BERNOULLI	BSD68	46	230	0.659192	22.3932
BERNOULLI	BSD68	46	240	0.576541	21.4565
BERNOULLI	BSD68	33	150	0.813998	21.5678
BERNOULLI	BSD68	33	160	0.789197	21.1351
BERNOULLI	BSD68	33	170	0.762141	20.6825
BERNOULLI	BSD68	33	180	0.731099	20.1254
BERNOULLI	BSD68	33	190	0.695873	19.6453
BERNOULLI	BSD68	33	200	0.655343	19.168
BERNOULLI	BSD68	33	210	0.612796	18.6635
BERNOULLI	BSD68	33	220	0.559606	18.0989
BERNOULLI	BSD68	33	230	0.496996	17.4106
BERNOULLI	BSD68	33	240	0.427085	16.7882
BERNOULLI	BSD68	9	150	0.941806	31.4622
BERNOULLI	BSD68	9	160	0.93243	30.8903
BERNOULLI	BSD68	9	170	0.92197	29.8557
BERNOULLI	BSD68	9	180	0.911112	29.4308
BERNOULLI	BSD68	9	190	0.89549	28.7549
BERNOULLI	BSD68	9	200	0.879974	27.9867
BERNOULLI	BSD68	9	210	0.86201	27.3583
BERNOULLI	BSD68	9	220	0.830852	26.4013
BERNOULLI	BSD68	9	230	0.798376	25.4829
BERNOULLI	BSD68	9	240	0.752251	24.146
BERNOULLI	BSD68	49	150	0.88782	27.4397
BERNOULLI	BSD68	49	160	0.873356	27.0108
BERNOULLI	BSD68	49	170	0.855154	26.4063
BERNOULLI	BSD68	49	180	0.830337	25.751
BERNOULLI	BSD68	49	190	0.809494	25.354
BERNOULLI	BSD68	49	200	0.77228	24.6435
BERNOULLI	BSD68	49	210	0.735754	23.9545
BERNOULLI	BSD68	49	220	0.684763	23.3329
BERNOULLI	BSD68	49	230	0.614101	22.4113
BERNOULLI	BSD68	49	240	0.521506	21.4324
BERNOULLI	BSD68	17	150	0.936223	32.1052
BERNOULLI	BSD68	17	160	0.924241	31.2714
BERNOULLI	BSD68	17	170	0.913927	30.6765
BERNOULLI	BSD68	17	180	0.903399	30.3434
BERNOULLI	BSD68	17	190	0.885342	29.639
BERNOULLI	BSD68	17	200	0.863573	28.7
BERNOULLI	BSD68	17	210	0.844929	28.2428
BERNOULLI	BSD68	17	220	0.819992	27.6108
BERNOULLI	BSD68	17	230	0.769448	26.5155
BERNOULLI	BSD68	17	240	0.710163	25.3196
BERNOULLI	BSD68	15	150	0.871062	25.3979
BERNOULLI	BSD68	15	160	0.850315	24.7262
BERNOULLI	BSD68	15	170	0.826328	24.1264
BERNOULLI	BSD68	15	180	0.801061	23.5769
BERNOULLI	BSD68	15	190	0.76659	23.0938
BERNOULLI	BSD68	15	200	0.729388	22.4033
BERNOULLI	BSD68	15	210	0.69078	22.0444
BERNOULLI	BSD68	15	220	0.624788	21.1441
BERNOULLI	BSD68	15	230	0.55849	20.603
BERNOULLI	BSD68	15	240	0.46753	19.774
BERNOULLI	BSD68	52	150	0.910325	28.1432
BERNOULLI	BSD68	52	160	0.896793	27.1389
BERNOULLI	BSD68	52	170	0.881609	26.4472
BERNOULLI	BSD68	52	180	0.86348	25.7664
BERNOULLI	BSD68	52	190	0.843718	24.9336
BERNOULLI	BSD68	52	200	0.816957	24.1131
BERNOULLI	BSD68	52	210	0.786425	23.3092
BERNOULLI	BSD68	52	220	0.747444	22.1165
BERNOULLI	BSD68	52	230	0.695264	20.8982
BERNOULLI	BSD68	52	240	0.613878	19.4371
BERNOULLI	BSD68	25	150	0.903211	27.4692
BERNOULLI	BSD68	25	160	0.889458	26.9415
BERNOULLI	BSD68	25	170	0.881189	26.5614
BERNOULLI	BSD68	25	180	0.864798	25.9893
BERNOULLI	BSD68	25	190	0.850036	25.3635
BERNOULLI	BSD68	25	200	0.83088	24.8123
BERNOULLI	BSD68	25	210	0.809773	24.0641
BERNOULLI	BSD68	25	220	0.78585	23.4922
BERNOULLI	BSD68	25	230	0.759052	22.9537
BERNOULLI	BSD68	25	240	0.716167	21.536
BERNOULLI	BSD68	22	150	0.941752	29.6411
BERNOULLI	BSD68	22	160	0.929383	28.6432
BERNOULLI	BSD68	22	170	0.917269	27.7453
BERNOULLI	BSD68	22	180	0.90068	26.7361
BERNOULLI	BSD68	22	190	0.882244	25.8892
BERNOULLI	BSD68	22	200	0.85727	24.9852
BERNOULLI	BSD68	22	210	0.822682	23.7224
BERNOULLI	BSD68	22	220	0.773532	22.4853
BERNOULLI	BSD68	22	230	0.702744	21.1732
BERNOULLI	BSD68	22	240	0.595574	19.4292
BERNOULLI	BSD68	61	150	0.910811	33.4924
BERNOULLI	BSD68	61	160	0.900132	32.9666
BERNOULLI	BSD68	61	170	0.889006	32.5368
BERNOULLI	BSD68	61	180	0.876774	32.151
BERNOULLI	BSD68	61	190	0.862336	31.4911
BERNOULLI	BSD68	61	200	0.844995	30.9701
BERNOULLI	BSD68	61	210	0.826991	30.4455
BERNOULLI	BSD68	61	220	0.805853	29.8467
BERNOULLI	BSD68	61	230	0.779408	29.1303
BERNOULLI	BSD68	61	240	0.737702	28.1686
BERNOULLI	BSD68	51	150	0.87553	27.5319
BERNOULLI	BSD68	51	160	0.86031	27.0438
BERNOULLI	BSD68	51	170	0.841375	26.5528
BERNOULLI	BSD68	51	180	0.819986	25.9397
BERNOULLI	BSD68	51	190	0.792861	25.4531
BERNOULLI	BSD68	51	200	0.767902	24.9272
BERNOULLI	BSD68	51	210	0.732615	24.3578
BERNOULLI	BSD68	51	220	0.69525	23.7708
BERNOULLI	BSD68	51	230	0.638797	22.9385
BERNOULLI	BSD68	51	240	0.563198	22.0379
BERNOULLI	BSD68	35	150	0.826193	23.5773
BERNOULLI	BSD68	35	160	0.799065	22.9962
BERNOULLI	BSD68	35	170	0.769171	22.4461
BERNOULLI	BSD68	35	180	0.73548	21.8688
BERNOULLI	BSD68	35	190	0.695231	21.3078
BERNOULLI	BSD68	35	200	0.640683	20.6696
BERNOULLI	BSD68	35	210	0.585563	20.137
BERNOULLI	BSD68	35	220	0.5222	19.6083
BERNOULLI	BSD68	35	230	0.440573	18.9938
BERNOULLI	BSD68	35	240	0.327973	18.2113
BERNOULLI	BSD68	8	150	0.829364	25.8331
BERNOULLI	BSD68	8	160	0.804867	25.2181
BERNOULLI	BSD68	8	170	0.782538	24.7876
BERNOULLI	BSD68	8	180	0.756095	24.264
BERNOULLI	BSD68	8	190	0.728638	23.8126
BERNOULLI	BSD68	8	200	0.694383	23.2446
BERNOULLI	BSD68	8	210	0.65334	22.6648
BERNOULLI	BSD68	8	220	0.611692	22.2326
BERNOULLI	BSD68	8	230	0.547925	21.4446
BERNOULLI	BSD68	8	240	0.46698	20.549
BERNOULLI	BSD68	38	150	0.951123	37.8436
BERNOULLI	BSD68	38	160	0.946332	37.321
BERNOULLI	BSD68	38	170	0.939969	36.7532
BERNOULLI	BSD68	38	180	0.933885	35.8685
BERNOULLI	BSD68	38	190	0.926785	35.4427
BERNOULLI	BSD68	38	200	0.915808	34.5765
BERNOULLI	BSD68	38	210	0.906846	34.0587
BERNOULLI	BSD68	38	220	0.890307	32.4663
BERNOULLI	BSD68	38	230	0.86991	30.7262
BERNOULLI	BSD68	38	240	0.841594	29.171
BERNOULLI	BSD68	10	150	0.931647	29.7
BERNOULLI	BSD68	10	160	0.923156	29.1498
BERNOULLI	BSD68	10	170	0.913667	28.5609
BERNOULLI	BSD68	10	180	0.902286	27.9614
BERNOULLI	BSD68	10	190	0.88915	27.2026
BERNOULLI	BSD68	10	200	0.876054	26.6743
BERNOULLI	BSD68	10	210	0.858151	25.8439
BERNOULLI	BSD68	10	220	0.834345	25.0615
BERNOULLI	BSD68	10	230	0.80312	24.1305
BERNOULLI	BSD68	10	240	0.751332	22.7506
BERNOULLI	BSD68	32	150	0.940649	34.2246
BERNOULLI	BSD68	32	160	0.932024	33.6
BERNOULLI	BSD68	32	170	0.927482	33.0183
BERNOULLI	BSD68	32	180	0.914636	31.8616
BERNOULLI	BSD68	32	190	0.905576	31.4912
BERNOULLI	BSD68	32	200	0.89532	30.9988
BERNOULLI	BSD68	32	210	0.879292	30.2481
BERNOULLI	BSD68	32	220	0.867078	29.3634
BERNOULLI	BSD68	32	230	0.846205	27.9853
BERNOULLI	BSD68	32	240	0.82155	26.2633
BERNOULLI	BSD68	23	150	0.966245	36.0268
BERNOULLI	BSD68	23	160	0.961817	35.522
BERNOULLI	BSD68	23	170	0.957118	35.029
BERNOULLI	BSD68	23	180	0.950103	34.2281
BERNOULLI	BSD68	23	190	0.942674	33.453
BERNOULLI	BSD68	23	200	0.935691	33.0522
BERNOULLI	BSD68	23	210	0.9249	32.4477
BERNOULLI	BSD68	23	220	0.908352	31.4559
BERNOULLI	BSD68	23	230	0.88686	30.5048
BERNOULLI	BSD68	23	240	0.854381	29.0738
BERNOULLI	BSD68	29	150	0.948308	30.6083
BERNOULLI	BSD68	29	160	0.940349	30.0573
BERNOULLI	BSD68	29	170	0.929183	29.2728
BERNOULLI	BSD68	29	180	0.917993	28.5525
BERNOULLI	BSD68	29	190	0.900854	27.7569
BERNOULLI	BSD68	29	200	0.882283	26.8925
BERNOULLI	BSD68	29	210	0.860321	26.1728
BERNOULLI	BSD68	29	220	0.826166	25.1243
BERNOULLI	BSD68	29	230	0.779514	23.8474
BERNOULLI	BSD68	29	240	0.694462	21.9913
BERNOULLI	BSD68	63	150	0.975215	37.6004
BERNOULLI	BSD68	63	160	0.972078	36.5713
BERNOULLI	BSD68	63	170	0.969059	35.6598
BERNOULLI	BSD68	63	180	0.965736	34.8825
BERNOULLI	BSD68	63	190	0.961481	34.1012
BERNOULLI	BSD68	63	200	0.956061	32.4795
BERNOULLI	BSD68	63	210	0.948915	31.374
BERNOULLI	BSD68	63	220	0.939823	29.8091
BERNOULLI	BSD68	63	230	0.920013	27.33
BERNOULLI	BSD68	63	240	0.891389	24.7067
BERNOULLI	BSD68	57	150	0.771239	22.7465
BERNOULLI	BSD68	57	160	0.743614	22.3292
BERNOULLI	BSD68	57	170	0.709521	21.8573
BERNOULLI	BSD68	57	180	0.672753	21.3853
BERNOULLI	BSD68	57	190	0.636532	21.0105
BERNOULLI	BSD68	57	200	0.590952	20.5539
BERNOULLI	BSD68	57	210	0.537454	20.0489
BERNOULLI	BSD68	57	220	0.480236	19.568
BERNOULLI	BSD68	57	230	0.413775	19.0675
BERNOULLI	BSD68	57	240	0.33163	18.4174
BERNOULLI	BSD68	19	150	0.953281	33.7335
BERNOULLI	BSD68	19	160	0.946357	33.1311
BERNOULLI	BSD68	19	170	0.935638	32.3188
BERNOULLI	BSD68	19	180	0.923119	31.6295
BERNOULLI	BSD68	19	190	0.907566	30.8305
BERNOULLI	BSD68	19	200	0.892147	30.2167
BERNOULLI	BSD68	19	210	0.866967	29.3851
BERNOULLI	BSD68	19	220	0.83451	28.3063
BERNOULLI	BSD68	19	230	0.788674	27.3932
BERNOULLI	BSD68	19	240	0.707997	25.8585
BERNOULLI	BSD68	58	150	0.887573	29.2384
BERNOULLI	BSD68	58	160	0.872402	28.7639
BERNOULLI	BSD68	58	170	0.857956	28.3177
BERNOULLI	BSD68	58	180	0.838282	27.7834
BERNOULLI	BSD68	58	190	0.819144	27.278
BERNOULLI	BSD68	58	200	0.796993	26.8853
BERNOULLI	BSD68	58	210	0.767208	26.2406
BERNOULLI	BSD68	58	220	0.736643	25.6802
BERNOULLI	BSD68	58	230	0.698163	24.9727
BERNOULLI	BSD68	58	240	0.649778	24.2893
BERNOULLI	BSD68	66	150	0.920738	30.7729
BERNOULLI	BSD68	66	160	0.909473	30.1471
BERNOULLI	BSD68	66	170	0.895743	29.4686
BERNOULLI	BSD68	66	180	0.881528	28.8383
BERNOULLI	BSD68	66	190	0.866132	28.2806
BERNOULLI	BSD68	66	200	0.844115	27.5897
BERNOULLI	BSD68	66	210	0.818976	26.869
BERNOULLI	BSD68	66	220	0.794598	26.1214
BERNOULLI	BSD68	66	230	0.746942	25.055
BERNOULLI	BSD68	66	240	0.696366	23.9697
BERNOULLI	BSD68	56	150	0.898215	28.3506
BERNOULLI	BSD68	56	160	0.883181	27.7565
BERNOULLI	BSD68	56	170	0.86318	27.0543
BERNOULLI	BSD68	56	180	0.844546	26.3313
BERNOULLI	BSD68	56	190	0.819273	25.6209
BERNOULLI	BSD68	56	200	0.786797	24.8708
BERNOULLI	BSD68	56	210	0.749438	24.1342
BERNOULLI	BSD68	56	220	0.706181	23.2954
BERNOULLI	BSD68	56	230	0.651635	22.4044
BERNOULLI	BSD68	56	240	0.567399	21.0526
BERNOULLI	BSD68	44	150	0.917205	29.8461
BERNOULLI	BSD68	44	160	0.906671	29.291
BERNOULLI	BSD68	44	170	0.893818	28.5382
BERNOULLI	BSD68	44	180	0.877198	27.8863
BERNOULLI	BSD68	44	190	0.86006	27.1779
BERNOULLI	BSD68	44	200	0.839384	26.535
BERNOULLI	BSD68	44	210	0.813638	25.7349
BERNOULLI	BSD68	44	220	0.783368	25.1453
BERNOULLI	BSD68	44	230	0.738088	23.9817
BERNOULLI	BSD68	44	240	0.688663	22.8511
BERNOULLI	BSD68	18	150	0.936889	29.5138
BERNOULLI	BSD68	18	160	0.930968	28.9758
BERNOULLI	BSD68	18	170	0.920733	28.3675
BERNOULLI	BSD68	18	180	0.904973	27.4841
BERNOULLI	BSD68	18	190	0.889803	26.704
BERNOULLI	BSD68	18	200	0.871498	26.0266
BERNOULLI	BSD68	18	210	0.844075	25.0073
BERNOULLI	BSD68	18	220	0.806384	23.9483
BERNOULLI	BSD68	18	230	0.758229	22.7631
BERNOULLI	BSD68	18	240	0.661877	20.8428
BERNOULLI	BSD68	7	150	0.87611	23.8432
BERNOULLI	BSD68	7	160	0.857937	23.2516
BERNOULLI	BSD68	7	170	0.837075	22.6881
BERNOULLI	BSD68	7	180	0.813583	22.1095
BERNOULLI	BSD68	7	190	0.78621	21.5052
BERNOULLI	BSD68	7	200	0.747899	20.81
BERNOULLI	BSD68	7	210	0.705603	20.1435
BERNOULLI	BSD68	7	220	0.651513	19.3651
BERNOULLI	BSD68	7	230	0.57626	18.3994
BERNOULLI	BSD68	7	240	0.472005	17.1691
BERNOULLI	BSD68	6	150	0.966794	31.1808
BERNOULLI	BSD68	6	160	0.960709	30.2603
BERNOULLI	BSD68	6	170	0.953494	29.3722
BERNOULLI	BSD68	6	180	0.945514	28.5959
BERNOULLI	BSD68	6	190	0.936012	27.8351
BERNOULLI	BSD68	6	200	0.921523	26.6635
BERNOULLI	BSD68	6	210	0.903873	25.6607
BERNOULLI	BSD68	6	220	0.877837	24.5242
BERNOULLI	BSD68	6	230	0.831859	22.7445
BERNOULLI	BSD68	6	240	0.761696	20.9748
BERNOULLI	BSD68	26	150	0.895732	24.8116
BERNOULLI	BSD68	26	160	0.882554	24.2718
BERNOULLI	BSD68	26	170	0.86524	23.6628
BERNOULLI	BSD68	26	180	0.841732	22.9498
BERNOULLI	BSD68	26	190	0.819426	22.3586
BERNOULLI	BSD68	26	200	0.787258	21.6683
BERNOULLI	BSD68	26	210	0.751125	20.9974
BERNOULLI	BSD68	26	220	0.695797	20.0505
BERNOULLI	BSD68	26	230	0.630077	19.1525
BERNOULLI	BSD68	26	240	0.532692	17.8756
BERNOULLI	BSD68	1	150	0.924583	31.5568
BERNOULLI	BSD68	1	160	0.910734	30.7058
BERNOULLI	BSD68	1	170	0.896968	30.0246
BERNOULLI	BSD68	1	180	0.877253	29.1165
BERNOULLI	BSD68	1	190	0.854979	28.3331
BERNOULLI	BSD68	1	200	0.830377	27.714
BERNOULLI	BSD68	1	210	0.793454	26.6789
BERNOULLI	BSD68	1	220	0.747181	25.6586
BERNOULLI	BSD68	1	230	0.682607	24.5836
BERNOULLI	BSD68	1	240	0.570586	23.0124
BERNOULLI	BSD68	21	150	0.888538	27.4241
BERNOULLI	BSD68	21	160	0.87464	26.9388
BERNOULLI	BSD68	21	170	0.854239	26.3239
BERNOULLI	BSD68	21	180	0.831162	25.6556
BERNOULLI	BSD68	21	190	0.805088	25.0729
BERNOULLI	BSD68	21	200	0.77644	24.5947
BERNOULLI	BSD68	21	210	0.739244	23.881
BERNOULLI	BSD68	21	220	0.697602	23.2893
BERNOULLI	BSD68	21	230	0.642385	22.4695
BERNOULLI	BSD68	21	240	0.570371	21.4886
BERNOULLI	BSD68	53	150	0.931215	34.7165
BERNOULLI	BSD68	53	160	0.925347	34.4285
BERNOULLI	BSD68	53	170	0.915085	33.8281
BERNOULLI	BSD68	53	180	0.905229	33.4074
BERNOULLI	BSD68	53	190	0.893832	32.9179
BERNOULLI	BSD68	53	200	0.883403	32.3733
BERNOULLI	BSD68	53	210	0.866231	31.7739
BERNOULLI	BSD68	53	220	0.848827	31.0785
BERNOULLI	BSD68	53	230	0.822584	30.0731
BERNOULLI	BSD68	53	240	0.786655	28.9226
BERNOULLI	BSD68	30	150	0.952878	30.1782
BERNOULLI	BSD68	30	160	0.946141	29.6348
BERNOULLI	BSD68	30	170	0.937402	28.9692
BERNOULLI	BSD68	30	180	0.926705	28.1619
BERNOULLI	BSD68	30	190	0.918308	27.6757
BERNOULLI	BSD68	30	200	0.903245	26.7629
BERNOULLI	BSD68	30	210	0.885465	26.0121
BERNOULLI	BSD68	30	220	0.861392	25.1251
BERNOULLI	BSD68	30	230	0.832152	24.0404
BERNOULLI	BSD68	30	240	0.779656	22.6701
BERNOULLI	BSD68	3	150	0.91556	30.7363
BERNOULLI	BSD68	3	160	0.901709	29.9986
BERNOULLI	BSD68	3	170	0.891502	29.609
BERNOULLI	BSD68	3	180	0.873747	28.9166
BERNOULLI	BSD68	3	190	0.855945	28.3589
BERNOULLI	BSD68	3	200	0.835368	27.7513
BERNOULLI	BSD68	3	210	0.810582	27.0494
BERNOULLI	BSD68	3	220	0.771207	25.9997
BERNOULLI	BSD68	3	230	0.728885	25.0784
BERNOULLI	BSD68	3	240	0.654866	23.649
BERNOULLI	BSD68	36	150	0.911523	28.3092
BERNOULLI	BSD68	36	160	0.898469	27.7501
BERNOULLI	BSD68	36	170	0.880436	27.0605
BERNOULLI	BSD68	36	180	0.85972	26.3633
BERNOULLI	BSD68	36	190	0.83379	25.6978
BERNOULLI	BSD68	36	200	0.802716	24.9274
BERNOULLI	BSD68	36	210	0.76083	24.1001
BERNOULLI	BSD68	36	220	0.709875	23.2516
BERNOULLI	BSD68	36	230	0.640219	22.3718
BERNOULLI	BSD68	36	240	0.526521	20.9435
BERNOULLI	BSD68	20	150	0.933706	32.301
BERNOULLI	BSD68	20	160	0.926634	31.9944
BERNOULLI	BSD68	20	170	0.916979	31.2867
BERNOULLI	BSD68	20	180	0.906171	30.6494
BERNOULLI	BSD68	20	190	0.889842	29.8047
BERNOULLI	BSD68	20	200	0.874655	29.2296
BERNOULLI	BSD68	20	210	0.854621	28.1383
BERNOULLI	BSD68	20	220	0.828197	27.4347
BERNOULLI	BSD68	20	230	0.799096	26.6557
BERNOULLI	BSD68	20	240	0.747436	25.1291
BERNOULLI	BSD68	34	150	0.949458	33.3437
BERNOULLI	BSD68	34	160	0.941895	32.7052
BERNOULLI	BSD68	34	170	0.93164	32.0338
BERNOULLI	BSD68	34	180	0.919841	31.2537
BERNOULLI	BSD68	34	190	0.904513	30.455
BERNOULLI	BSD68	34	200	0.887895	29.7028
BERNOULLI	BSD68	34	210	0.863036	28.5731
BERNOULLI	BSD68	34	220	0.826787	27.6216
BERNOULLI	BSD68	34	230	0.778044	26.6128
BERNOULLI	BSD68	34	240	0.704321	25.3295
BERNOULLI	BSD68	28	150	0.943657	28.8894
BERNOULLI	BSD68	28	160	0.936652	28.5352
BERNOULLI	BSD68	28	170	0.926606	27.8289
BERNOULLI	BSD68	28	180	0.912385	27.1365
BERNOULLI	BSD68	28	190	0.898786	26.5905
BERNOULLI	BSD68	28	200	0.880433	25.9575
BERNOULLI	BSD68	28	210	0.85967	25.2753
BERNOULLI	BSD68	28	220	0.824009	24.3994
BERNOULLI	BSD68	28	230	0.775522	23.4103
BERNOULLI	BSD68	28	240	0.695655	22.1157
BERNOULLI	BSD68	5	150	0.901713	30.1754
BERNOULLI	BSD68	5	160	0.886929	29.4037
BERNOULLI	BSD68	5	170	0.876638	28.7907
BERNOULLI	BSD68	5	180	0.86042	28.254
BERNOULLI	BSD68	5	190	0.843772	27.4615
BERNOULLI	BSD68	5	200	0.823824	26.5431
BERNOULLI	BSD68	5	210	0.800117	26.0568
BERNOULLI	BSD68	5	220	0.765001	25.0644
BERNOULLI	BSD68	5	230	0.724033	23.9693
BERNOULLI	BSD68	5	240	0.649901	22.3361
BERNOULLI	BSD68	43	150	0.894993	28.1702
BERNOULLI	BSD68	43	160	0.881026	27.6588
BERNOULLI	BSD68	43	170	0.861973	26.93
BERNOULLI	BSD68	43	180	0.844194	26.3753
BERNOULLI	BSD68	43	190	0.825377	25.8192
BERNOULLI	BSD68	43	200	0.799598	25.1167
BERNOULLI	BSD68	43	210	0.770162	24.5751
BERNOULLI	BSD68	43	220	0.734648	23.773
BERNOULLI	BSD68	43	230	0.686701	22.8367
BERNOULLI	BSD68	43	240	0.626476	21.7972
BERNOULLI	BSD68	55	150	0.937162	31.8003
BERNOULLI	BSD68	55	160	0.926309	30.9235
BERNOULLI	BSD68	55	170	0.916311	30.3644
BERNOULLI	BSD68	55	180	0.898487	29.3521
BERNOULLI	BSD68	55	190	0.881034	28.548
BERNOULLI	BSD68	55	200	0.862296	27.8374
BERNOULLI	BSD68	55	210	0.834134	26.918
BERNOULLI	BSD68	55	220	0.795615	25.8302
BERNOULLI	BSD68	55	230	0.749684	24.7046
BERNOULLI	BSD68	55	240	0.662307	22.9111
BERNOULLI	BSD68	67	150	0.861944	24.3881
BERNOULLI	BSD68	67	160	0.841281	23.8193
BERNOULLI	BSD68	67	170	0.822393	23.3549
BERNOULLI	BSD68	67	180	0.805069	22.9121
BERNOULLI	BSD68	67	190	0.777128	22.4489
BERNOULLI	BSD68	67	200	0.750754	21.9561
BERNOULLI	BSD68	67	210	0.713827	21.3381
BERNOULLI	BSD68	67	220	0.67589	20.8581
BERNOULLI	BSD68	67	230	0.628111	20.1809
BERNOULLI	BSD68	67	240	0.56904	19.3393
BERNOULLI	BSD68	41	150	0.939252	32.6011
BERNOULLI	BSD68	41	160	0.928013	31.8152
BERNOULLI	BSD68	41	170	0.917138	31.1672
BERNOULLI	BSD68	41	180	0.900067	30.4359
BERNOULLI	BSD68	41	190	0.882763	29.7641
BERNOULLI	BSD68	41	200	0.857975	28.8622
BERNOULLI	BSD68	41	210	0.820259	27.8572
BERNOULLI	BSD68	41	220	0.78544	27.2136
BERNOULLI	BSD68	41	230	0.72231	25.9734
BERNOULLI	BSD68	41	240	0.627629	24.6985
BERNOULLI	BSD68	0	150	0.988455	41.91
BERNOULLI	BSD68	0	160	0.987135	41.2331
BERNOULLI	BSD68	0	170	0.985635	40.2771
BERNOULLI	BSD68	0	180	0.984048	39.8294
BERNOULLI	BSD68	0	190	0.982073	38.73
BERNOULLI	BSD68	0	200	0.980082	37.8813
BERNOULLI	BSD68	0	210	0.976693	37.0436
BERNOULLI	BSD68	0	220	0.973322	36.2405
BERNOULLI	BSD68	0	230	0.965836	34.2601
BERNOULLI	BSD68	0	240	0.954756	32.6408
BERNOULLI	BSD68	13	150	0.964591	36.8021
BERNOULLI	BSD68	13	160	0.960472	36.4192
BERNOULLI	BSD68	13	170	0.953974	35.5623
BERNOULLI	BSD68	13	180	0.94862	35.2154
BERNOULLI	BSD68	13	190	0.941154	34.5046
BERNOULLI	BSD68	13	200	0.932214	33.8867
BERNOULLI	BSD68	13	210	0.921902	33.0825
BERNOULLI	BSD68	13	220	0.907349	31.9895
BERNOULLI	BSD68	13	230	0.888099	31.0174
BERNOULLI	BSD68	13	240	0.858661	29.414
BERNOULLI	BSD68	48	150	0.870358	25.3426
BERNOULLI	BSD68	48	160	0.848945	24.7797
BERNOULLI	BSD68	48	170	0.829141	24.1227
BERNOULLI	BSD68	48	180	0.801287	23.3465
BERNOULLI	BSD68	48	190	0.771716	22.7352
BERNOULLI	BSD68	48	200	0.738877	22.122
BERNOULLI	BSD68	48	210	0.691076	21.3946
BERNOULLI	BSD68	48	220	0.639446	20.6457
BERNOULLI	BSD68	48	230	0.574269	19.7764
BERNOULLI	BSD68	48	240	0.470606	18.6018
BERNOULLI	BSD68	45	150	0.967943	31.8689
BERNOULLI	BSD68	45	160	0.962379	31.1599
BERNOULLI	BSD68	45	170	0.955606	30.4925
BERNOULLI	BSD68	45	180	0.949383	29.7418
BERNOULLI	BSD68	45	190	0.937045	28.6125
BERNOULLI	BSD68	45	200	0.925378	27.9114
BERNOULLI	BSD68	45	210	0.905514	26.8263
BERNOULLI	BSD68	45	220	0.886244	25.7834
BERNOULLI	BSD68	45	230	0.849093	24.3952
BERNOULLI	BSD68	45	240	0.783423	22.4823
BERNOULLI	BSD68	54	150	0.913998	34.6387
BERNOULLI	BSD68	54	160	0.904332	34.1744
BERNOULLI	BSD68	54	170	0.893155	33.6838
BERNOULLI	BSD68	54	180	0.879539	33.0975
BERNOULLI	BSD68	54	190	0.866238	32.7802
BERNOULLI	BSD68	54	200	0.847049	32.1318
BERNOULLI	BSD68	54	210	0.823554	31.4596
BERNOULLI	BSD68	54	220	0.800904	30.904
BERNOULLI	BSD68	54	230	0.761916	30.1498
BERNOULLI	BSD68	54	240	0.71403	29.1346
BERNOULLI	BSD68	60	150	0.901176	32.6052
BERNOULLI	BSD68	60	160	0.88933	32.1106
BERNOULLI	BSD68	60	170	0.879412	31.8136
BERNOULLI	BSD68	60	180	0.863958	31.3582
BERNOULLI	BSD68	60	190	0.846798	30.7464
BERNOULLI	BSD68	60	200	0.829835	30.4251
BERNOULLI	BSD68	60	210	0.807365	29.7328
BERNOULLI	BSD68	60	220	0.782894	29.1612
BERNOULLI	BSD68	60	230	0.754493	28.3149
BERNOULLI	BSD68	60	240	0.708269	27.0474
BERNOULLI	BSD68	39	150	0.75311	29.0642
BERNOULLI	BSD68	39	160	0.725198	28.6488
BERNOULLI	BSD68	39	170	0.692405	28.2591
BERNOULLI	BSD68	39	180	0.663892	27.9501
BERNOULLI	BSD68	39	190	0.631566	27.599
BERNOULLI	BSD68	39	200	0.596367	27.2267
BERNOULLI	BSD68	39	210	0.562878	26.9458
BERNOULLI	BSD68	39	220	0.523445	26.5597
BERNOULLI	BSD68	39	230	0.480384	26.14
BERNOULLI	BSD68	39	240	0.431304	25.6342
BERNOULLI	BSD68	11	150	0.964155	34.5923
BERNOULLI	BSD68	11	160	0.957649	33.942
BERNOULLI	BSD68	11	170	0.949498	33.179
BERNOULLI	BSD68	11	180	0.941775	32.5901
BERNOULLI	BSD68	11	190	0.929378	31.8206
BERNOULLI	BSD68	11	200	0.917496	31.226
BERNOULLI	BSD68	11	210	0.896866	30.2876
BERNOULLI	BSD68	11	220	0.872136	29.2905
BERNOULLI	BSD68	11	230	0.831825	27.985
BERNOULLI	BSD68	11	240	0.772716	26.575
BERNOULLI	BSD68	4	150	0.903979	29.3801
BERNOULLI	BSD68	4	160	0.887167	28.41
BERNOULLI	BSD68	4	170	0.874865	28.0102
BERNOULLI	BSD68	4	180	0.856255	27.4501
BERNOULLI	BSD68	4	190	0.835514	26.644
BERNOULLI	BSD68	4	200	0.812572	26.0562
BERNOULLI	BSD68	4	210	0.786504	25.4514
BERNOULLI	BSD68	4	220	0.752778	24.5725
BERNOULLI	BSD68	4	230	0.703537	23.7321
BERNOULLI	BSD68	4	240	0.640476	22.4596
BERNOULLI	BSD68	31	150	0.942655	33.3387
BERNOULLI	BSD68	31	160	0.93533	32.7915
BERNOULLI	BSD68	31	170	0.926157	32.3023
BERNOULLI	BSD68	31	180	0.91204	31.4154
BERNOULLI	BSD68	31	190	0.899752	30.8456
BERNOULLI	BSD68	31	200	0.880051	29.8889
BERNOULLI	BSD68	31	210	0.861266	29.2526
BERNOULLI	BSD68	31	220	0.83004	28.263
BERNOULLI	BSD68	31	230	0.788594	27.1857
BERNOULLI	BSD68	31	240	0.72366	25.7479
BERNOULLI	BSD68	27	150	0.898282	27.7277
BERNOULLI	BSD68	27	160	0.883393	27.0885
BERNOULLI	BSD68	27	170	0.863905	26.4765
BERNOULLI	BSD68	27	180	0.844519	25.748
BERNOULLI	BSD68	27	190	0.816331	24.9567
BERNOULLI	BSD68	27	200	0.787231	24.257
BERNOULLI	BSD68	27	210	0.748731	23.4815
BERNOULLI	BSD68	27	220	0.702835	22.7848
BERNOULLI	BSD68	27	230	0.62669	21.4389
BERNOULLI	BSD68	27	240	0.530187	20.0433
BERNOULLI	BSD68	59	150	0.908672	33.7421
BERNOULLI	BSD68	59	160	0.896863	33.2719
BERNOULLI	BSD68	59	170	0.885023	32.8097
BERNOULLI	BSD68	59	180	0.871947	32.3702
BERNOULLI	BSD68	59	190	0.857299	31.9012
BERNOULLI	BSD68	59	200	0.841498	31.5301
BERNOULLI	BSD68	59	210	0.820836	30.8982
BERNOULLI	BSD68	59	220	0.796776	30.3405
BERNOULLI	BSD68	59	230	0.766327	29.7101
BERNOULLI	BSD68	59	240	0.732438	28.9609
BERNOULLI	BSD68	37	150	0.920464	27.0213
BERNOULLI	BSD68	37	160	0.910261	26.5656
BERNOULLI	BSD68	37	170	0.899768	26.1115
BERNOULLI	BSD68	37	180	0.888198	25.5953
BERNOULLI	BSD68	37	190	0.87223	25.0663
BERNOULLI	BSD68	37	200	0.856279	24.5317
BERNOULLI	BSD68	37	210	0.829549	23.887
BERNOULLI	BSD68	37	220	0.806133	23.2632
BERNOULLI	BSD68	37	230	0.771234	22.533
BERNOULLI	BSD68	37	240	0.712637	21.4474
BERNOULLI	BSD68	47	150	0.959078	38.1913
BERNOULLI	BSD68	47	160	0.954565	37.8103
BERNOULLI	BSD68	47	170	0.946434	37.1607
BERNOULLI	BSD68	47	180	0.940136	36.5777
BERNOULLI	BSD68	47	190	0.932767	36.0342
BERNOULLI	BSD68	47	200	0.919302	35.2697
BERNOULLI	BSD68	47	210	0.906014	34.583
BERNOULLI	BSD68	47	220	0.887	33.6389
BERNOULLI	BSD68	47	230	0.858684	32.5459
BERNOULLI	BSD68	47	240	0.824285	31.3959
BERNOULLI	BSD68	12	150	0.904653	28.3729
BERNOULLI	BSD68	12	160	0.89268	27.9591
BERNOULLI	BSD68	12	170	0.876019	27.3917
BERNOULLI	BSD68	12	180	0.858062	26.8667
BERNOULLI	BSD68	12	190	0.840547	26.3916
BERNOULLI	BSD68	12	200	0.816367	25.886
BERNOULLI	BSD68	12	210	0.784824	25.1803
BERNOULLI	BSD68	12	220	0.743695	24.4296
BERNOULLI	BSD68	12	230	0.695968	23.723
BERNOULLI	BSD68	12	240	0.632372	22.6756
BERNOULLI	BSD68	50	150	0.923771	33.9678
BERNOULLI	BSD68	50	160	0.915201	33.579
BERNOULLI	BSD68	50	170	0.90345	33.0565
BERNOULLI	BSD68	50	180	0.891965	32.3828
BERNOULLI	BSD68	50	190	0.880125	31.9854
BERNOULLI	BSD68	50	200	0.864043	31.3544
BERNOULLI	BSD68	50	210	0.848735	30.7977
BERNOULLI	BSD68	50	220	0.827543	30.0502
BERNOULLI	BSD68	50	230	0.802964	29.3889
BERNOULLI	BSD68	50	240	0.771476	28.3277
BERNOULLI	BSD68	65	150	0.8503	28.1149
BERNOULLI	BSD68	65	160	0.833141	27.636
BERNOULLI	BSD68	65	170	0.808212	26.9381
BERNOULLI	BSD68	65	180	0.784574	26.4799
BERNOULLI	BSD68	65	190	0.758111	25.9401
BERNOULLI	BSD68	65	200	0.726035	25.4017
BERNOULLI	BSD68	65	210	0.689823	24.7734
BERNOULLI	BSD68	65	220	0.64185	24.1002
BERNOULLI	BSD68	65	230	0.58551	23.165
BERNOULLI	BSD68	65	240	0.505514	22.1222
BERNOULLI	BSD68	42	150	0.985361	39.4303
BERNOULLI	BSD68	42	160	0.983586	38.6543
BERNOULLI	BSD68	42	170	0.981134	38.0631
BERNOULLI	BSD68	42	180	0.978119	36.8789
BERNOULLI	BSD68	42	190	0.974492	36.04
BERNOULLI	BSD68	42	200	0.967824	34.448
BERNOULLI	BSD68	42	210	0.958915	32.882
BERNOULLI	BSD68	42	220	0.946047	31.5843
BERNOULLI	BSD68	42	230	0.919781	30.0427
BERNOULLI	BSD68	42	240	0.862603	26.7746
BERNOULLI	BSD68	40	150	0.884534	29.9718
BERNOULLI	BSD68	40	160	0.875612	29.5357
BERNOULLI	BSD68	40	170	0.856319	28.9555
BERNOULLI	BSD68	40	180	0.837606	28.4809
BERNOULLI	BSD68	40	190	0.818251	27.9053
BERNOULLI	BSD68	40	200	0.800079	27.6452
BERNOULLI	BSD68	40	210	0.769261	26.92
BERNOULLI	BSD68	40	220	0.739202	26.33
BERNOULLI	BSD68	40	230	0.695049	25.2968
BERNOULLI	BSD68	40	240	0.645118	24.3946
BERNOULLI	BSD68	64	150	0.906356	26.9842
BERNOULLI	BSD68	64	160	0.889214	26.2638
BERNOULLI	BSD68	64	170	0.872978	25.7483
BERNOULLI	BSD68	64	180	0.854881	25.2097
BERNOULLI	BSD68	64	190	0.832035	24.6353
BERNOULLI	BSD68	64	200	0.803059	23.9835
BERNOULLI	BSD68	64	210	0.770239	23.3632
BERNOULLI	BSD68	64	220	0.72001	22.679
BERNOULLI	BSD68	64	230	0.651428	21.7188
BERNOULLI	BSD68	64	240	0.555454	20.6272
BERNOULLI	BSD68	2	150	0.954864	36.6883
BERNOULLI	BSD68	2	160	0.949047	36.1609
BERNOULLI	BSD68	2	170	0.942922	35.5542
BERNOULLI	BSD68	2	180	0.934818	35.0609
BERNOULLI	BSD68	2	190	0.927236	34.3169
BERNOULLI	BSD68	2	200	0.917333	34.0084
BERNOULLI	BSD68	2	210	0.903966	32.9268
BERNOULLI	BSD68	2	220	0.889608	32.4812
BERNOULLI	BSD68	2	230	0.864321	31.0338
BERNOULLI	BSD68	2	240	0.829227	29.9665
BERNOULLI	BSD68	14	150	0.942336	30.4279
BERNOULLI	BSD68	14	160	0.932765	29.7738
BERNOULLI	BSD68	14	170	0.919472	28.9072
BERNOULLI	BSD68	14	180	0.90619	28.1971
BERNOULLI	BSD68	14	190	0.887222	27.4824
BERNOULLI	BSD68	14	200	0.864299	26.5436
BERNOULLI	BSD68	14	210	0.837061	25.7675
BERNOULLI	BSD68	14	220	0.796564	24.8899
BERNOULLI	BSD68	14	230	0.741521	23.763
BERNOULLI	BSD68	14	240	0.650861	22.3975
BERNOULLI	BSD68	24	150	0.887604	27.891
BERNOULLI	BSD68	24	160	0.875426	27.4341
BERNOULLI	BSD68	24	170	0.859049	26.9525
BERNOULLI	BSD68	24	180	0.842329	26.4158
BERNOULLI	BSD68	24	190	0.824442	25.9633
BERNOULLI	BSD68	24	200	0.800259	25.2674
BERNOULLI	BSD68	24	210	0.775397	24.6667
BERNOULLI	BSD68	24	220	0.746932	24.1321
BERNOULLI	BSD68	24	230	0.703953	23.1997
BERNOULLI	BSD68	24	240	0.651891	22.1822
BERNOULLI	Set12	10	150	0.916139	32.9496
BERNOULLI	Set12	10	160	0.907945	32.2953
BERNOULLI	Set12	10	170	0.898094	31.7183
BERNOULLI	Set12	10	180	0.886349	30.9641
BERNOULLI	Set12	10	190	0.872475	30.276
BERNOULLI	Set12	10	200	0.854705	29.2862
BERNOULLI	Set12	10	210	0.833645	28.553
BERNOULLI	Set12	10	220	0.801295	27.3943
BERNOULLI	Set12	10	230	0.760215	26.2149
BERNOULLI	Set12	10	240	0.69047	24.5651
BERNOULLI	Set12	12	150	0.935671	32.7708
BERNOULLI	Set12	12	160	0.928105	32.2917
BERNOULLI	Set12	12	170	0.91855	31.6097
BERNOULLI	Set12	12	180	0.907089	30.9406
BERNOULLI	Set12	12	190	0.893137	30.2352
BERNOULLI	Set12	12	200	0.876877	29.339
BERNOULLI	Set12	12	210	0.852633	28.4679
BERNOULLI	Set12	12	220	0.822773	27.4274
BERNOULLI	Set12	12	230	0.773975	26.0398
BERNOULLI	Set12	12	240	0.694568	24.6124
BERNOULLI	Set12	1	150	0.921766	29.3422
BERNOULLI	Set12	1	160	0.913262	28.4499
BERNOULLI	Set12	1	170	0.902838	27.986
BERNOULLI	Set12	1	180	0.895121	27.5522
BERNOULLI	Set12	1	190	0.88295	26.7258
BERNOULLI	Set12	1	200	0.863912	25.9703
BERNOULLI	Set12	1	210	0.845254	25.0586
BERNOULLI	Set12	1	220	0.821321	23.9237
BERNOULLI	Set12	1	230	0.787691	23.0449
BERNOULLI	Set12	1	240	0.735126	21.6551
BERNOULLI	Set12	4	150	0.954852	32.2704
BERNOULLI	Set12	4	160	0.945399	31.0612
BERNOULLI	Set12	4	170	0.934703	30.2992
BERNOULLI	Set12	4	180	0.921936	29.3607
BERNOULLI	Set12	4	190	0.908488	28.5089
BERNOULLI	Set12	4	200	0.891627	27.4657
BERNOULLI	Set12	4	210	0.860253	26.2234
BERNOULLI	Set12	4	220	0.833517	25.247
BERNOULLI	Set12	4	230	0.776536	23.5197
BERNOULLI	Set12	4	240	0.695165	21.9388
BERNOULLI	Set12	3	150	0.945692	25.2128
BERNOULLI	Set12	3	160	0.940546	24.9574
BERNOULLI	Set12	3	170	0.935915	25.0286
BERNOULLI	Set12	3	180	0.926298	24.7455
BERNOULLI	Set12	3	190	0.916859	24.5558
BERNOULLI	Set12	3	200	0.909832	24.5744
BERNOULLI	Set12	3	210	0.893941	24.0787
BERNOULLI	Set12	3	220	0.875988	23.5731
BERNOULLI	Set12	3	230	0.851481	23.1199
BERNOULLI	Set12	3	240	0.789442	22.1582
BERNOULLI	Set12	9	150	0.943856	31.1762
BERNOULLI	Set12	9	160	0.93539	30.4072
BERNOULLI	Set12	9	170	0.923211	29.4837
BERNOULLI	Set12	9	180	0.909522	28.6734
BERNOULLI	Set12	9	190	0.891912	27.7903
BERNOULLI	Set12	9	200	0.86958	26.8671
BERNOULLI	Set12	9	210	0.832951	25.7983
BERNOULLI	Set12	9	220	0.789514	24.7428
BERNOULLI	Set12	9	230	0.735473	23.7508
BERNOULLI	Set12	9	240	0.68337	22.871
BERNOULLI	Set12	6	150	0.92576	28.4819
BERNOULLI	Set12	6	160	0.916129	27.9813
BERNOULLI	Set12	6	170	0.908906	27.3938
BERNOULLI	Set12	6	180	0.898149	26.9654
BERNOULLI	Set12	6	190	0.885381	26.2792
BERNOULLI	Set12	6	200	0.872279	25.593
BERNOULLI	Set12	6	210	0.845565	24.6579
BERNOULLI	Set12	6	220	0.821051	23.5902
BERNOULLI	Set12	6	230	0.786757	22.703
BERNOULLI	Set12	6	240	0.730568	21.4971
BERNOULLI	Set12	5	150	0.96869	31.8553
BERNOULLI	Set12	5	160	0.963336	30.9996
BERNOULLI	Set12	5	170	0.957014	30.0209
BERNOULLI	Set12	5	180	0.954084	29.4766
BERNOULLI	Set12	5	190	0.94594	28.8757
BERNOULLI	Set12	5	200	0.936538	27.9053
BERNOULLI	Set12	5	210	0.921371	26.775
BERNOULLI	Set12	5	220	0.89604	25.3978
BERNOULLI	Set12	5	230	0.862991	23.8979
BERNOULLI	Set12	5	240	0.79028	21.5128
BERNOULLI	Set12	11	150	0.937395	33.1204
BERNOULLI	Set12	11	160	0.929725	32.5795
BERNOULLI	Set12	11	170	0.918691	31.8531
BERNOULLI	Set12	11	180	0.90647	31.2675
BERNOULLI	Set12	11	190	0.892431	30.4855
BERNOULLI	Set12	11	200	0.875466	29.9043
BERNOULLI	Set12	11	210	0.851451	29.0154
BERNOULLI	Set12	11	220	0.823261	28.1027
BERNOULLI	Set12	11	230	0.781552	27.0148
BERNOULLI	Set12	11	240	0.711116	25.3494
BERNOULLI	Set12	2	150	0.946596	36.8653
BERNOULLI	Set12	2	160	0.939685	36.3635
BERNOULLI	Set12	2	170	0.930641	35.4684
BERNOULLI	Set12	2	180	0.92328	34.8582
BERNOULLI	Set12	2	190	0.913496	34.2729
BERNOULLI	Set12	2	200	0.903704	33.4175
BERNOULLI	Set12	2	210	0.890936	32.5653
BERNOULLI	Set12	2	220	0.870919	30.7727
BERNOULLI	Set12	2	230	0.849532	29.4098
BERNOULLI	Set12	2	240	0.804813	26.7408
BERNOULLI	Set12	7	150	0.937533	29.1452
BERNOULLI	Set12	7	160	0.931375	28.9576
BERNOULLI	Set12	7	170	0.922044	27.8949
BERNOULLI	Set12	7	180	0.912604	27.3047
BERNOULLI	Set12	7	190	0.897362	26.0713
BERNOULLI	Set12	7	200	0.888317	25.8439
BERNOULLI	Set12	7	210	0.872477	25.1489
BERNOULLI	Set12	7	220	0.845135	23.5202
BERNOULLI	Set12	7	230	0.803699	21.878
BERNOULLI	Set12	7	240	0.747603	19.7861
BERNOULLI	Set12	8	150	0.949796	36.4448
BERNOULLI	Set12	8	160	0.943529	35.7804
BERNOULLI	Set12	8	170	0.937466	35.0711
BERNOULLI	Set12	8	180	0.930659	34.4235
BERNOULLI	Set12	8	190	0.923382	33.7803
BERNOULLI	Set12	8	200	0.913147	33.0083
BERNOULLI	Set12	8	210	0.901441	32.116
BERNOULLI	Set12	8	220	0.882838	30.8793
BERNOULLI	Set12	8	230	0.859858	29.604
BERNOULLI	Set12	8	240	0.818652	27.6827
BERNOULLI	Urban100	img_079_SRF_2_HR	150	0.937968	29.4727
BERNOULLI	Urban100	img_079_SRF_2_HR	160	0.927754	28.8537
BERNOULLI	Urban100	img_079_SRF_2_HR	170	0.916219	28.1605
BERNOULLI	Urban100	img_079_SRF_2_HR	180	0.901255	27.4581
BERNOULLI	Urban100	img_079_SRF_2_HR	190	0.885448	26.7698
BERNOULLI	Urban100	img_079_SRF_2_HR	200	0.862755	25.9847
BERNOULLI	Urban100	img_079_SRF_2_HR	210	0.837378	25.3022
BERNOULLI	Urban100	img_079_SRF_2_HR	220	0.79378	24.2967
BERNOULLI	Urban100	img_079_SRF_2_HR	230	0.743229	23.2525
BERNOULLI	Urban100	img_079_SRF_2_HR	240	0.661987	21.9142
BERNOULLI	Urban100	img_013_SRF_2_HR	150	0.955901	31.8004
BERNOULLI	Urban100	img_013_SRF_2_HR	160	0.948468	31.0662
BERNOULLI	Urban100	img_013_SRF_2_HR	170	0.939513	30.1902
BERNOULLI	Urban100	img_013_SRF_2_HR	180	0.928461	29.3128
BERNOULLI	Urban100	img_013_SRF_2_HR	190	0.914668	28.3423
BERNOULLI	Urban100	img_013_SRF_2_HR	200	0.896154	27.4212
BERNOULLI	Urban100	img_013_SRF_2_HR	210	0.87462	26.4497
BERNOULLI	Urban100	img_013_SRF_2_HR	220	0.840742	25.3301
BERNOULLI	Urban100	img_013_SRF_2_HR	230	0.789642	23.7921
BERNOULLI	Urban100	img_013_SRF_2_HR	240	0.691282	21.7404
BERNOULLI	Urban100	img_084_SRF_2_HR	150	0.947412	31.5484
BERNOULLI	Urban100	img_084_SRF_2_HR	160	0.938601	30.8842
BERNOULLI	Urban100	img_084_SRF_2_HR	170	0.929315	30.2816
BERNOULLI	Urban100	img_084_SRF_2_HR	180	0.91605	29.423
BERNOULLI	Urban100	img_084_SRF_2_HR	190	0.899303	28.5101
BERNOULLI	Urban100	img_084_SRF_2_HR	200	0.878417	27.6509
BERNOULLI	Urban100	img_084_SRF_2_HR	210	0.84922	26.5272
BERNOULLI	Urban100	img_084_SRF_2_HR	220	0.807415	25.4325
BERNOULLI	Urban100	img_084_SRF_2_HR	230	0.74554	24.1244
BERNOULLI	Urban100	img_084_SRF_2_HR	240	0.644962	22.4273
BERNOULLI	Urban100	img_096_SRF_2_HR	150	0.966978	29.9836
BERNOULLI	Urban100	img_096_SRF_2_HR	160	0.9593	29.0886
BERNOULLI	Urban100	img_096_SRF_2_HR	170	0.950842	28.2141
BERNOULLI	Urban100	img_096_SRF_2_HR	180	0.943148	27.4992
BERNOULLI	Urban100	img_096_SRF_2_HR	190	0.926131	26.3296
BERNOULLI	Urban100	img_096_SRF_2_HR	200	0.912662	25.5898
BERNOULLI	Urban100	img_096_SRF_2_HR	210	0.887156	24.4385
BERNOULLI	Urban100	img_096_SRF_2_HR	220	0.856715	23.371
BERNOULLI	Urban100	img_096_SRF_2_HR	230	0.789588	21.6706
BERNOULLI	Urban100	img_096_SRF_2_HR	240	0.690429	20.0565
BERNOULLI	Urban100	img_034_SRF_2_HR	150	0.87258	27.0849
BERNOULLI	Urban100	img_034_SRF_2_HR	160	0.857882	26.4938
BERNOULLI	Urban100	img_034_SRF_2_HR	170	0.840858	25.7944
BERNOULLI	Urban100	img_034_SRF_2_HR	180	0.819911	25.0999
BERNOULLI	Urban100	img_034_SRF_2_HR	190	0.796229	24.3924
BERNOULLI	Urban100	img_034_SRF_2_HR	200	0.765605	23.5073
BERNOULLI	Urban100	img_034_SRF_2_HR	210	0.726967	22.4924
BERNOULLI	Urban100	img_034_SRF_2_HR	220	0.688346	21.8457
BERNOULLI	Urban100	img_034_SRF_2_HR	230	0.618721	20.5749
BERNOULLI	Urban100	img_034_SRF_2_HR	240	0.536868	19.1542
BERNOULLI	Urban100	img_099_SRF_2_HR	150	0.79335	11.2445
BERNOULLI	Urban100	img_099_SRF_2_HR	160	0.779475	11.1485
BERNOULLI	Urban100	img_099_SRF_2_HR	170	0.766773	11.1115
BERNOULLI	Urban100	img_099_SRF_2_HR	180	0.745392	11.0826
BERNOULLI	Urban100	img_099_SRF_2_HR	190	0.721099	10.9486
BERNOULLI	Urban100	img_099_SRF_2_HR	200	0.697615	11.1599
BERNOULLI	Urban100	img_099_SRF_2_HR	210	0.662922	10.9345
BERNOULLI	Urban100	img_099_SRF_2_HR	220	0.597454	10.7952
BERNOULLI	Urban100	img_099_SRF_2_HR	230	0.525102	10.691
BERNOULLI	Urban100	img_099_SRF_2_HR	240	0.432354	10.701
BERNOULLI	Urban100	img_024_SRF_2_HR	150	0.953583	26.5309
BERNOULLI	Urban100	img_024_SRF_2_HR	160	0.943401	25.793
BERNOULLI	Urban100	img_024_SRF_2_HR	170	0.9335	25.0638
BERNOULLI	Urban100	img_024_SRF_2_HR	180	0.919156	24.2531
BERNOULLI	Urban100	img_024_SRF_2_HR	190	0.899371	23.2945
BERNOULLI	Urban100	img_024_SRF_2_HR	200	0.875284	22.1678
BERNOULLI	Urban100	img_024_SRF_2_HR	210	0.837394	21.0824
BERNOULLI	Urban100	img_024_SRF_2_HR	220	0.789809	19.9738
BERNOULLI	Urban100	img_024_SRF_2_HR	230	0.708199	18.3341
BERNOULLI	Urban100	img_024_SRF_2_HR	240	0.571013	16.7339
BERNOULLI	Urban100	img_019_SRF_2_HR	150	0.919234	23.2143
BERNOULLI	Urban100	img_019_SRF_2_HR	160	0.90642	22.5038
BERNOULLI	Urban100	img_019_SRF_2_HR	170	0.891424	21.7111
BERNOULLI	Urban100	img_019_SRF_2_HR	180	0.878534	21.2775
BERNOULLI	Urban100	img_019_SRF_2_HR	190	0.857842	20.338
BERNOULLI	Urban100	img_019_SRF_2_HR	200	0.828451	19.4949
BERNOULLI	Urban100	img_019_SRF_2_HR	210	0.801857	18.8764
BERNOULLI	Urban100	img_019_SRF_2_HR	220	0.76533	18.0591
BERNOULLI	Urban100	img_019_SRF_2_HR	230	0.698323	17.1471
BERNOULLI	Urban100	img_019_SRF_2_HR	240	0.611492	15.9686
BERNOULLI	Urban100	img_074_SRF_2_HR	150	0.915616	28.6737
BERNOULLI	Urban100	img_074_SRF_2_HR	160	0.902343	28.0833
BERNOULLI	Urban100	img_074_SRF_2_HR	170	0.886359	27.436
BERNOULLI	Urban100	img_074_SRF_2_HR	180	0.869054	26.7836
BERNOULLI	Urban100	img_074_SRF_2_HR	190	0.846636	26.1225
BERNOULLI	Urban100	img_074_SRF_2_HR	200	0.818906	25.448
BERNOULLI	Urban100	img_074_SRF_2_HR	210	0.781763	24.7904
BERNOULLI	Urban100	img_074_SRF_2_HR	220	0.730591	23.8735
BERNOULLI	Urban100	img_074_SRF_2_HR	230	0.670235	23.0511
BERNOULLI	Urban100	img_074_SRF_2_HR	240	0.589821	21.967
BERNOULLI	Urban100	img_053_SRF_2_HR	150	0.94478	26.4705
BERNOULLI	Urban100	img_053_SRF_2_HR	160	0.936394	25.7258
BERNOULLI	Urban100	img_053_SRF_2_HR	170	0.923946	24.8474
BERNOULLI	Urban100	img_053_SRF_2_HR	180	0.908903	24.0309
BERNOULLI	Urban100	img_053_SRF_2_HR	190	0.88699	23.1496
BERNOULLI	Urban100	img_053_SRF_2_HR	200	0.864793	22.3758
BERNOULLI	Urban100	img_053_SRF_2_HR	210	0.830394	21.3123
BERNOULLI	Urban100	img_053_SRF_2_HR	220	0.784128	20.2031
BERNOULLI	Urban100	img_053_SRF_2_HR	230	0.719113	18.9681
BERNOULLI	Urban100	img_053_SRF_2_HR	240	0.611148	17.2512
BERNOULLI	Urban100	img_065_SRF_2_HR	150	0.954176	30.9609
BERNOULLI	Urban100	img_065_SRF_2_HR	160	0.945105	30.0969
BERNOULLI	Urban100	img_065_SRF_2_HR	170	0.936012	29.4722
BERNOULLI	Urban100	img_065_SRF_2_HR	180	0.924166	28.7045
BERNOULLI	Urban100	img_065_SRF_2_HR	190	0.908539	27.8289
BERNOULLI	Urban100	img_065_SRF_2_HR	200	0.885997	26.8622
BERNOULLI	Urban100	img_065_SRF_2_HR	210	0.860095	25.9039
BERNOULLI	Urban100	img_065_SRF_2_HR	220	0.81802	24.7609
BERNOULLI	Urban100	img_065_SRF_2_HR	230	0.751908	23.5081
BERNOULLI	Urban100	img_065_SRF_2_HR	240	0.637504	21.7112
BERNOULLI	Urban100	img_081_SRF_2_HR	150	0.938067	32.0282
BERNOULLI	Urban100	img_081_SRF_2_HR	160	0.934963	30.7365
BERNOULLI	Urban100	img_081_SRF_2_HR	170	0.93175	30.3207
BERNOULLI	Urban100	img_081_SRF_2_HR	180	0.926019	28.5401
BERNOULLI	Urban100	img_081_SRF_2_HR	190	0.919699	28.1667
BERNOULLI	Urban100	img_081_SRF_2_HR	200	0.910605	27.1257
BERNOULLI	Urban100	img_081_SRF_2_HR	210	0.898861	26.2699
BERNOULLI	Urban100	img_081_SRF_2_HR	220	0.876978	24.6245
BERNOULLI	Urban100	img_081_SRF_2_HR	230	0.844248	23.2751
BERNOULLI	Urban100	img_081_SRF_2_HR	240	0.769034	20.7048
BERNOULLI	Urban100	img_088_SRF_2_HR	150	0.874551	23.6019
BERNOULLI	Urban100	img_088_SRF_2_HR	160	0.852858	22.8493
BERNOULLI	Urban100	img_088_SRF_2_HR	170	0.832978	22.3315
BERNOULLI	Urban100	img_088_SRF_2_HR	180	0.805025	21.7717
BERNOULLI	Urban100	img_088_SRF_2_HR	190	0.776798	21.145
BERNOULLI	Urban100	img_088_SRF_2_HR	200	0.747537	20.5984
BERNOULLI	Urban100	img_088_SRF_2_HR	210	0.704671	20.0158
BERNOULLI	Urban100	img_088_SRF_2_HR	220	0.654826	19.2408
BERNOULLI	Urban100	img_088_SRF_2_HR	230	0.581393	18.3226
BERNOULLI	Urban100	img_088_SRF_2_HR	240	0.46999	17.1846
BERNOULLI	Urban100	img_016_SRF_2_HR	150	0.66382	7.33766
BERNOULLI	Urban100	img_016_SRF_2_HR	160	0.660765	7.3368
BERNOULLI	Urban100	img_016_SRF_2_HR	170	0.65773	7.38775
BERNOULLI	Urban100	img_016_SRF_2_HR	180	0.654663	7.41264
BERNOULLI	Urban100	img_016_SRF_2_HR	190	0.649863	7.43898
BERNOULLI	Urban100	img_016_SRF_2_HR	200	0.642805	7.53575
BERNOULLI	Urban100	img_016_SRF_2_HR	210	0.63367	7.60702
BERNOULLI	Urban100	img_016_SRF_2_HR	220	0.620392	7.7791
BERNOULLI	Urban100	img_016_SRF_2_HR	230	0.591854	7.86037
BERNOULLI	Urban100	img_016_SRF_2_HR	240	0.54361	7.99875
BERNOULLI	Urban100	img_017_SRF_2_HR	150	0.955546	28.9556
BERNOULLI	Urban100	img_017_SRF_2_HR	160	0.948613	28.3512
BERNOULLI	Urban100	img_017_SRF_2_HR	170	0.940245	27.6619
BERNOULLI	Urban100	img_017_SRF_2_HR	180	0.92715	26.7794
BERNOULLI	Urban100	img_017_SRF_2_HR	190	0.911417	25.889
BERNOULLI	Urban100	img_017_SRF_2_HR	200	0.896519	25.2497
BERNOULLI	Urban100	img_017_SRF_2_HR	210	0.869474	24.2659
BERNOULLI	Urban100	img_017_SRF_2_HR	220	0.833493	23.1808
BERNOULLI	Urban100	img_017_SRF_2_HR	230	0.782888	21.9836
BERNOULLI	Urban100	img_017_SRF_2_HR	240	0.692679	20.3486
BERNOULLI	Urban100	img_059_SRF_2_HR	150	0.937525	28.7586
BERNOULLI	Urban100	img_059_SRF_2_HR	160	0.928945	28.1692
BERNOULLI	Urban100	img_059_SRF_2_HR	170	0.921072	27.7847
BERNOULLI	Urban100	img_059_SRF_2_HR	180	0.907257	26.9763
BERNOULLI	Urban100	img_059_SRF_2_HR	190	0.890667	26.2553
BERNOULLI	Urban100	img_059_SRF_2_HR	200	0.870991	25.3838
BERNOULLI	Urban100	img_059_SRF_2_HR	210	0.847796	24.7435
BERNOULLI	Urban100	img_059_SRF_2_HR	220	0.806749	23.7165
BERNOULLI	Urban100	img_059_SRF_2_HR	230	0.762227	22.7538
BERNOULLI	Urban100	img_059_SRF_2_HR	240	0.693514	21.525
BERNOULLI	Urban100	img_066_SRF_2_HR	150	0.929388	28.174
BERNOULLI	Urban100	img_066_SRF_2_HR	160	0.916675	27.3848
BERNOULLI	Urban100	img_066_SRF_2_HR	170	0.905321	26.8506
BERNOULLI	Urban100	img_066_SRF_2_HR	180	0.890636	26.2261
BERNOULLI	Urban100	img_066_SRF_2_HR	190	0.872931	25.6369
BERNOULLI	Urban100	img_066_SRF_2_HR	200	0.85052	24.921
BERNOULLI	Urban100	img_066_SRF_2_HR	210	0.823728	24.0473
BERNOULLI	Urban100	img_066_SRF_2_HR	220	0.78202	23.1798
BERNOULLI	Urban100	img_066_SRF_2_HR	230	0.720458	21.9864
BERNOULLI	Urban100	img_066_SRF_2_HR	240	0.629199	20.6426
BERNOULLI	Urban100	img_078_SRF_2_HR	150	0.907146	29.8174
BERNOULLI	Urban100	img_078_SRF_2_HR	160	0.895472	29.2605
BERNOULLI	Urban100	img_078_SRF_2_HR	170	0.879629	28.5305
BERNOULLI	Urban100	img_078_SRF_2_HR	180	0.862143	27.9371
BERNOULLI	Urban100	img_078_SRF_2_HR	190	0.84236	27.2923
BERNOULLI	Urban100	img_078_SRF_2_HR	200	0.812686	26.4527
BERNOULLI	Urban100	img_078_SRF_2_HR	210	0.78605	25.7313
BERNOULLI	Urban100	img_078_SRF_2_HR	220	0.749212	25.007
BERNOULLI	Urban100	img_078_SRF_2_HR	230	0.690552	24.0931
BERNOULLI	Urban100	img_078_SRF_2_HR	240	0.614303	23.0298
BERNOULLI	Urban100	img_073_SRF_2_HR	150	0.875662	24.4512
BERNOULLI	Urban100	img_073_SRF_2_HR	160	0.854975	23.8463
BERNOULLI	Urban100	img_073_SRF_2_HR	170	0.836306	23.3703
BERNOULLI	Urban100	img_073_SRF_2_HR	180	0.811875	22.7966
BERNOULLI	Urban100	img_073_SRF_2_HR	190	0.779247	22.1499
BERNOULLI	Urban100	img_073_SRF_2_HR	200	0.74053	21.3809
BERNOULLI	Urban100	img_073_SRF_2_HR	210	0.694093	20.678
BERNOULLI	Urban100	img_073_SRF_2_HR	220	0.627872	19.8661
BERNOULLI	Urban100	img_073_SRF_2_HR	230	0.544637	18.9836
BERNOULLI	Urban100	img_073_SRF_2_HR	240	0.421136	17.8318
BERNOULLI	Urban100	img_067_SRF_2_HR	150	0.944002	23.2766
BERNOULLI	Urban100	img_067_SRF_2_HR	160	0.936657	22.6014
BERNOULLI	Urban100	img_067_SRF_2_HR	170	0.925966	21.9659
BERNOULLI	Urban100	img_067_SRF_2_HR	180	0.914338	21.2011
BERNOULLI	Urban100	img_067_SRF_2_HR	190	0.896009	20.2029
BERNOULLI	Urban100	img_067_SRF_2_HR	200	0.878235	19.4127
BERNOULLI	Urban100	img_067_SRF_2_HR	210	0.845862	18.246
BERNOULLI	Urban100	img_067_SRF_2_HR	220	0.801939	17.0533
BERNOULLI	Urban100	img_067_SRF_2_HR	230	0.739834	15.7513
BERNOULLI	Urban100	img_067_SRF_2_HR	240	0.615151	13.8641
BERNOULLI	Urban100	img_033_SRF_2_HR	150	0.934571	31.6592
BERNOULLI	Urban100	img_033_SRF_2_HR	160	0.925027	31.0107
BERNOULLI	Urban100	img_033_SRF_2_HR	170	0.913542	30.2558
BERNOULLI	Urban100	img_033_SRF_2_HR	180	0.898549	29.5253
BERNOULLI	Urban100	img_033_SRF_2_HR	190	0.886612	29.0429
BERNOULLI	Urban100	img_033_SRF_2_HR	200	0.862496	28.0844
BERNOULLI	Urban100	img_033_SRF_2_HR	210	0.83668	27.0824
BERNOULLI	Urban100	img_033_SRF_2_HR	220	0.803579	25.7887
BERNOULLI	Urban100	img_033_SRF_2_HR	230	0.74432	24.4204
BERNOULLI	Urban100	img_033_SRF_2_HR	240	0.665279	22.8635
BERNOULLI	Urban100	img_087_SRF_2_HR	150	0.973462	31.1123
BERNOULLI	Urban100	img_087_SRF_2_HR	160	0.968865	30.3168
BERNOULLI	Urban100	img_087_SRF_2_HR	170	0.962261	29.4039
BERNOULLI	Urban100	img_087_SRF_2_HR	180	0.954441	28.5472
BERNOULLI	Urban100	img_087_SRF_2_HR	190	0.942892	27.4053
BERNOULLI	Urban100	img_087_SRF_2_HR	200	0.932065	26.8228
BERNOULLI	Urban100	img_087_SRF_2_HR	210	0.909014	25.4925
BERNOULLI	Urban100	img_087_SRF_2_HR	220	0.880741	23.9999
BERNOULLI	Urban100	img_087_SRF_2_HR	230	0.833322	22.5987
BERNOULLI	Urban100	img_087_SRF_2_HR	240	0.74472	20.5047
BERNOULLI	Urban100	img_100_SRF_2_HR	150	0.938956	30.6715
BERNOULLI	Urban100	img_100_SRF_2_HR	160	0.930642	29.8991
BERNOULLI	Urban100	img_100_SRF_2_HR	170	0.92375	29.5121
BERNOULLI	Urban100	img_100_SRF_2_HR	180	0.913452	28.492
BERNOULLI	Urban100	img_100_SRF_2_HR	190	0.899417	27.4906
BERNOULLI	Urban100	img_100_SRF_2_HR	200	0.885263	26.6342
BERNOULLI	Urban100	img_100_SRF_2_HR	210	0.862983	25.4836
BERNOULLI	Urban100	img_100_SRF_2_HR	220	0.834522	24.0129
BERNOULLI	Urban100	img_100_SRF_2_HR	230	0.788997	22.2689
BERNOULLI	Urban100	img_100_SRF_2_HR	240	0.701068	19.9628
BERNOULLI	Urban100	img_049_SRF_2_HR	150	0.936352	25.1475
BERNOULLI	Urban100	img_049_SRF_2_HR	160	0.927782	24.6148
BERNOULLI	Urban100	img_049_SRF_2_HR	170	0.912272	23.6136
BERNOULLI	Urban100	img_049_SRF_2_HR	180	0.898511	23.1251
BERNOULLI	Urban100	img_049_SRF_2_HR	190	0.877546	22.4299
BERNOULLI	Urban100	img_049_SRF_2_HR	200	0.852026	21.4084
BERNOULLI	Urban100	img_049_SRF_2_HR	210	0.816451	20.4713
BERNOULLI	Urban100	img_049_SRF_2_HR	220	0.76797	19.4096
BERNOULLI	Urban100	img_049_SRF_2_HR	230	0.700626	18.3343
BERNOULLI	Urban100	img_049_SRF_2_HR	240	0.57927	16.655
BERNOULLI	Urban100	img_085_SRF_2_HR	150	0.969648	30.7356
BERNOULLI	Urban100	img_085_SRF_2_HR	160	0.964455	30.1735
BERNOULLI	Urban100	img_085_SRF_2_HR	170	0.957019	29.2923
BERNOULLI	Urban100	img_085_SRF_2_HR	180	0.951184	28.6178
BERNOULLI	Urban100	img_085_SRF_2_HR	190	0.942538	27.8519
BERNOULLI	Urban100	img_085_SRF_2_HR	200	0.933266	27.1685
BERNOULLI	Urban100	img_085_SRF_2_HR	210	0.918572	26.3152
BERNOULLI	Urban100	img_085_SRF_2_HR	220	0.901883	25.356
BERNOULLI	Urban100	img_085_SRF_2_HR	230	0.869058	24.0377
BERNOULLI	Urban100	img_085_SRF_2_HR	240	0.816497	22.4135
BERNOULLI	Urban100	img_070_SRF_2_HR	150	0.894254	28.2541
BERNOULLI	Urban100	img_070_SRF_2_HR	160	0.87965	27.7674
BERNOULLI	Urban100	img_070_SRF_2_HR	170	0.86816	27.2873
BERNOULLI	Urban100	img_070_SRF_2_HR	180	0.849311	26.6717
BERNOULLI	Urban100	img_070_SRF_2_HR	190	0.830951	26.1467
BERNOULLI	Urban100	img_070_SRF_2_HR	200	0.805133	25.456
BERNOULLI	Urban100	img_070_SRF_2_HR	210	0.776493	24.8323
BERNOULLI	Urban100	img_070_SRF_2_HR	220	0.739039	24.0961
BERNOULLI	Urban100	img_070_SRF_2_HR	230	0.687707	23.0701
BERNOULLI	Urban100	img_070_SRF_2_HR	240	0.608318	21.9146
BERNOULLI	Urban100	img_038_SRF_2_HR	150	0.903323	31.5086
BERNOULLI	Urban100	img_038_SRF_2_HR	160	0.888167	30.8725
BERNOULLI	Urban100	img_038_SRF_2_HR	170	0.873019	30.3291
BERNOULLI	Urban100	img_038_SRF_2_HR	180	0.851804	29.5889
BERNOULLI	Urban100	img_038_SRF_2_HR	190	0.826754	28.9021
BERNOULLI	Urban100	img_038_SRF_2_HR	200	0.790628	28.1209
BERNOULLI	Urban100	img_038_SRF_2_HR	210	0.752816	27.3844
BERNOULLI	Urban100	img_038_SRF_2_HR	220	0.696136	26.5156
BERNOULLI	Urban100	img_038_SRF_2_HR	230	0.620363	25.2837
BERNOULLI	Urban100	img_038_SRF_2_HR	240	0.520692	24.2204
BERNOULLI	Urban100	img_052_SRF_2_HR	150	0.971834	32.6692
BERNOULLI	Urban100	img_052_SRF_2_HR	160	0.9658	31.6614
BERNOULLI	Urban100	img_052_SRF_2_HR	170	0.960001	30.7932
BERNOULLI	Urban100	img_052_SRF_2_HR	180	0.949246	29.755
BERNOULLI	Urban100	img_052_SRF_2_HR	190	0.937226	28.8365
BERNOULLI	Urban100	img_052_SRF_2_HR	200	0.924527	27.8789
BERNOULLI	Urban100	img_052_SRF_2_HR	210	0.902284	26.462
BERNOULLI	Urban100	img_052_SRF_2_HR	220	0.866092	24.714
BERNOULLI	Urban100	img_052_SRF_2_HR	230	0.814158	22.9579
BERNOULLI	Urban100	img_052_SRF_2_HR	240	0.725867	20.9212
BERNOULLI	Urban100	img_060_SRF_2_HR	150	0.911143	27.9143
BERNOULLI	Urban100	img_060_SRF_2_HR	160	0.899487	27.3683
BERNOULLI	Urban100	img_060_SRF_2_HR	170	0.88132	26.6068
BERNOULLI	Urban100	img_060_SRF_2_HR	180	0.865482	26.0921
BERNOULLI	Urban100	img_060_SRF_2_HR	190	0.840343	25.2596
BERNOULLI	Urban100	img_060_SRF_2_HR	200	0.809269	24.4632
BERNOULLI	Urban100	img_060_SRF_2_HR	210	0.773611	23.6995
BERNOULLI	Urban100	img_060_SRF_2_HR	220	0.725902	22.8693
BERNOULLI	Urban100	img_060_SRF_2_HR	230	0.653464	21.7396
BERNOULLI	Urban100	img_060_SRF_2_HR	240	0.553776	20.4521
BERNOULLI	Urban100	img_029_SRF_2_HR	150	0.939277	29.1729
BERNOULLI	Urban100	img_029_SRF_2_HR	160	0.932277	28.7368
BERNOULLI	Urban100	img_029_SRF_2_HR	170	0.920141	27.7852
BERNOULLI	Urban100	img_029_SRF_2_HR	180	0.906466	26.9528
BERNOULLI	Urban100	img_029_SRF_2_HR	190	0.88498	26.1327
BERNOULLI	Urban100	img_029_SRF_2_HR	200	0.869099	25.5988
BERNOULLI	Urban100	img_029_SRF_2_HR	210	0.83456	24.3744
BERNOULLI	Urban100	img_029_SRF_2_HR	220	0.795756	23.482
BERNOULLI	Urban100	img_029_SRF_2_HR	230	0.725994	21.7849
BERNOULLI	Urban100	img_029_SRF_2_HR	240	0.628015	20.2088
BERNOULLI	Urban100	img_076_SRF_2_HR	150	0.910605	25.9157
BERNOULLI	Urban100	img_076_SRF_2_HR	160	0.896291	25.3093
BERNOULLI	Urban100	img_076_SRF_2_HR	170	0.883339	24.8729
BERNOULLI	Urban100	img_076_SRF_2_HR	180	0.863535	24.2084
BERNOULLI	Urban100	img_076_SRF_2_HR	190	0.841692	23.6718
BERNOULLI	Urban100	img_076_SRF_2_HR	200	0.814236	22.9679
BERNOULLI	Urban100	img_076_SRF_2_HR	210	0.775069	22.2221
BERNOULLI	Urban100	img_076_SRF_2_HR	220	0.724264	21.4159
BERNOULLI	Urban100	img_076_SRF_2_HR	230	0.669511	20.467
BERNOULLI	Urban100	img_076_SRF_2_HR	240	0.583699	19.2195
BERNOULLI	Urban100	img_050_SRF_2_HR	150	0.9244	27.4005
BERNOULLI	Urban100	img_050_SRF_2_HR	160	0.911728	26.6408
BERNOULLI	Urban100	img_050_SRF_2_HR	170	0.897699	26.0532
BERNOULLI	Urban100	img_050_SRF_2_HR	180	0.88039	25.462
BERNOULLI	Urban100	img_050_SRF_2_HR	190	0.860703	24.822
BERNOULLI	Urban100	img_050_SRF_2_HR	200	0.842692	24.3141
BERNOULLI	Urban100	img_050_SRF_2_HR	210	0.807458	23.572
BERNOULLI	Urban100	img_050_SRF_2_HR	220	0.769006	22.7632
BERNOULLI	Urban100	img_050_SRF_2_HR	230	0.714255	21.8093
BERNOULLI	Urban100	img_050_SRF_2_HR	240	0.637866	20.6816
BERNOULLI	Urban100	img_095_SRF_2_HR	150	0.844199	25.4496
BERNOULLI	Urban100	img_095_SRF_2_HR	160	0.823532	24.9014
BERNOULLI	Urban100	img_095_SRF_2_HR	170	0.797563	24.3364
BERNOULLI	Urban100	img_095_SRF_2_HR	180	0.773304	23.8592
BERNOULLI	Urban100	img_095_SRF_2_HR	190	0.735035	23.1924
BERNOULLI	Urban100	img_095_SRF_2_HR	200	0.687556	22.4386
BERNOULLI	Urban100	img_095_SRF_2_HR	210	0.642155	21.9321
BERNOULLI	Urban100	img_095_SRF_2_HR	220	0.577063	21.0897
BERNOULLI	Urban100	img_095_SRF_2_HR	230	0.491267	20.1388
BERNOULLI	Urban100	img_095_SRF_2_HR	240	0.383557	19.0242
BERNOULLI	Urban100	img_020_SRF_2_HR	150	0.907299	24.753
BERNOULLI	Urban100	img_020_SRF_2_HR	160	0.894695	24.1157
BERNOULLI	Urban100	img_020_SRF_2_HR	170	0.87697	23.4725
BERNOULLI	Urban100	img_020_SRF_2_HR	180	0.857373	22.8496
BERNOULLI	Urban100	img_020_SRF_2_HR	190	0.834733	22.1792
BERNOULLI	Urban100	img_020_SRF_2_HR	200	0.808561	21.5572
BERNOULLI	Urban100	img_020_SRF_2_HR	210	0.767229	20.7038
BERNOULLI	Urban100	img_020_SRF_2_HR	220	0.719888	19.916
BERNOULLI	Urban100	img_020_SRF_2_HR	230	0.65673	18.9273
BERNOULLI	Urban100	img_020_SRF_2_HR	240	0.563672	17.833
BERNOULLI	Urban100	img_045_SRF_2_HR	150	0.968173	29.3138
BERNOULLI	Urban100	img_045_SRF_2_HR	160	0.961242	28.5225
BERNOULLI	Urban100	img_045_SRF_2_HR	170	0.951643	27.6201
BERNOULLI	Urban100	img_045_SRF_2_HR	180	0.93864	26.726
BERNOULLI	Urban100	img_045_SRF_2_HR	190	0.924413	25.8566
BERNOULLI	Urban100	img_045_SRF_2_HR	200	0.902278	24.7942
BERNOULLI	Urban100	img_045_SRF_2_HR	210	0.86951	23.6854
BERNOULLI	Urban100	img_045_SRF_2_HR	220	0.824841	22.4217
BERNOULLI	Urban100	img_045_SRF_2_HR	230	0.729177	20.5107
BERNOULLI	Urban100	img_045_SRF_2_HR	240	0.576328	18.4694
BERNOULLI	Urban100	img_006_SRF_2_HR	150	0.905359	26.7651
BERNOULLI	Urban100	img_006_SRF_2_HR	160	0.889578	26.0439
BERNOULLI	Urban100	img_006_SRF_2_HR	170	0.874434	25.3612
BERNOULLI	Urban100	img_006_SRF_2_HR	180	0.854252	24.71
BERNOULLI	Urban100	img_006_SRF_2_HR	190	0.831176	23.9614
BERNOULLI	Urban100	img_006_SRF_2_HR	200	0.800765	23.1074
BERNOULLI	Urban100	img_006_SRF_2_HR	210	0.757614	22.1796
BERNOULLI	Urban100	img_006_SRF_2_HR	220	0.708327	21.1866
BERNOULLI	Urban100	img_006_SRF_2_HR	230	0.62285	19.878
BERNOULLI	Urban100	img_006_SRF_2_HR	240	0.514412	18.5818
BERNOULLI	Urban100	img_043_SRF_2_HR	150	0.967823	31.0256
BERNOULLI	Urban100	img_043_SRF_2_HR	160	0.962824	30.169
BERNOULLI	Urban100	img_043_SRF_2_HR	170	0.957009	29.1686
BERNOULLI	Urban100	img_043_SRF_2_HR	180	0.949255	28.2989
BERNOULLI	Urban100	img_043_SRF_2_HR	190	0.939951	27.1203
BERNOULLI	Urban100	img_043_SRF_2_HR	200	0.92836	25.9413
BERNOULLI	Urban100	img_043_SRF_2_HR	210	0.909525	24.3678
BERNOULLI	Urban100	img_043_SRF_2_HR	220	0.88525	22.6479
BERNOULLI	Urban100	img_043_SRF_2_HR	230	0.847059	20.5341
BERNOULLI	Urban100	img_043_SRF_2_HR	240	0.762681	17.4559
BERNOULLI	Urban100	img_063_SRF_2_HR	150	0.921202	25.3728
BERNOULLI	Urban100	img_063_SRF_2_HR	160	0.913127	24.7708
BERNOULLI	Urban100	img_063_SRF_2_HR	170	0.901554	23.9812
BERNOULLI	Urban100	img_063_SRF_2_HR	180	0.884767	23.2044
BERNOULLI	Urban100	img_063_SRF_2_HR	190	0.868645	22.3413
BERNOULLI	Urban100	img_063_SRF_2_HR	200	0.841253	21.2614
BERNOULLI	Urban100	img_063_SRF_2_HR	210	0.810029	20.3191
BERNOULLI	Urban100	img_063_SRF_2_HR	220	0.757956	18.9755
BERNOULLI	Urban100	img_063_SRF_2_HR	230	0.680409	17.3783
BERNOULLI	Urban100	img_063_SRF_2_HR	240	0.565578	15.7013
BERNOULLI	Urban100	img_007_SRF_2_HR	150	0.963999	31.3138
BERNOULLI	Urban100	img_007_SRF_2_HR	160	0.958121	30.6451
BERNOULLI	Urban100	img_007_SRF_2_HR	170	0.947679	29.4922
BERNOULLI	Urban100	img_007_SRF_2_HR	180	0.937878	28.8477
BERNOULLI	Urban100	img_007_SRF_2_HR	190	0.92314	27.7609
BERNOULLI	Urban100	img_007_SRF_2_HR	200	0.907434	26.8539
BERNOULLI	Urban100	img_007_SRF_2_HR	210	0.882768	25.6942
BERNOULLI	Urban100	img_007_SRF_2_HR	220	0.854417	24.7077
BERNOULLI	Urban100	img_007_SRF_2_HR	230	0.798678	23.088
BERNOULLI	Urban100	img_007_SRF_2_HR	240	0.703005	20.8792
BERNOULLI	Urban100	img_077_SRF_2_HR	150	0.901957	27.4816
BERNOULLI	Urban100	img_077_SRF_2_HR	160	0.886183	26.8735
BERNOULLI	Urban100	img_077_SRF_2_HR	170	0.873253	26.3675
BERNOULLI	Urban100	img_077_SRF_2_HR	180	0.855727	25.8324
BERNOULLI	Urban100	img_077_SRF_2_HR	190	0.833161	25.1912
BERNOULLI	Urban100	img_077_SRF_2_HR	200	0.812716	24.7335
BERNOULLI	Urban100	img_077_SRF_2_HR	210	0.784641	24.0159
BERNOULLI	Urban100	img_077_SRF_2_HR	220	0.740913	23.2406
BERNOULLI	Urban100	img_077_SRF_2_HR	230	0.691784	22.4538
BERNOULLI	Urban100	img_077_SRF_2_HR	240	0.617288	21.3256
BERNOULLI	Urban100	img_054_SRF_2_HR	150	0.931074	26.5473
BERNOULLI	Urban100	img_054_SRF_2_HR	160	0.920335	25.8619
BERNOULLI	Urban100	img_054_SRF_2_HR	170	0.910901	25.3775
BERNOULLI	Urban100	img_054_SRF_2_HR	180	0.893045	24.5434
BERNOULLI	Urban100	img_054_SRF_2_HR	190	0.874853	23.881
BERNOULLI	Urban100	img_054_SRF_2_HR	200	0.852273	23.0534
BERNOULLI	Urban100	img_054_SRF_2_HR	210	0.818331	22.0299
BERNOULLI	Urban100	img_054_SRF_2_HR	220	0.777143	21.2059
BERNOULLI	Urban100	img_054_SRF_2_HR	230	0.718252	20.242
BERNOULLI	Urban100	img_054_SRF_2_HR	240	0.617809	18.8633
BERNOULLI	Urban100	img_068_SRF_2_HR	150	0.962132	32.6134
BERNOULLI	Urban100	img_068_SRF_2_HR	160	0.954939	31.8662
BERNOULLI	Urban100	img_068_SRF_2_HR	170	0.947299	31.0359
BERNOULLI	Urban100	img_068_SRF_2_HR	180	0.936454	30.2624
BERNOULLI	Urban100	img_068_SRF_2_HR	190	0.922299	29.3773
BERNOULLI	Urban100	img_068_SRF_2_HR	200	0.901594	28.2582
BERNOULLI	Urban100	img_068_SRF_2_HR	210	0.874767	27.2737
BERNOULLI	Urban100	img_068_SRF_2_HR	220	0.834529	26.0164
BERNOULLI	Urban100	img_068_SRF_2_HR	230	0.78113	24.7918
BERNOULLI	Urban100	img_068_SRF_2_HR	240	0.6796	22.8576
BERNOULLI	Urban100	img_089_SRF_2_HR	150	0.919387	30.2825
BERNOULLI	Urban100	img_089_SRF_2_HR	160	0.90782	29.5839
BERNOULLI	Urban100	img_089_SRF_2_HR	170	0.894804	29.0427
BERNOULLI	Urban100	img_089_SRF_2_HR	180	0.877731	28.3915
BERNOULLI	Urban100	img_089_SRF_2_HR	190	0.859092	27.7627
BERNOULLI	Urban100	img_089_SRF_2_HR	200	0.834633	27.0032
BERNOULLI	Urban100	img_089_SRF_2_HR	210	0.805669	26.2967
BERNOULLI	Urban100	img_089_SRF_2_HR	220	0.762252	25.5001
BERNOULLI	Urban100	img_089_SRF_2_HR	230	0.705378	24.3319
BERNOULLI	Urban100	img_089_SRF_2_HR	240	0.613415	22.9565
BERNOULLI	Urban100	img_010_SRF_2_HR	150	0.960248	31.8203
BERNOULLI	Urban100	img_010_SRF_2_HR	160	0.955244	31.2853
BERNOULLI	Urban100	img_010_SRF_2_HR	170	0.946801	30.3493
BERNOULLI	Urban100	img_010_SRF_2_HR	180	0.938129	29.5576
BERNOULLI	Urban100	img_010_SRF_2_HR	190	0.926109	28.6396
BERNOULLI	Urban100	img_010_SRF_2_HR	200	0.911194	27.7149
BERNOULLI	Urban100	img_010_SRF_2_HR	210	0.890846	26.5847
BERNOULLI	Urban100	img_010_SRF_2_HR	220	0.861413	25.3603
BERNOULLI	Urban100	img_010_SRF_2_HR	230	0.825446	24.223
BERNOULLI	Urban100	img_010_SRF_2_HR	240	0.749736	22.1506
BERNOULLI	Urban100	img_097_SRF_2_HR	150	0.949922	29.2692
BERNOULLI	Urban100	img_097_SRF_2_HR	160	0.942078	28.6555
BERNOULLI	Urban100	img_097_SRF_2_HR	170	0.930228	27.7515
BERNOULLI	Urban100	img_097_SRF_2_HR	180	0.919254	27.1726
BERNOULLI	Urban100	img_097_SRF_2_HR	190	0.902539	26.3674
BERNOULLI	Urban100	img_097_SRF_2_HR	200	0.880379	25.3687
BERNOULLI	Urban100	img_097_SRF_2_HR	210	0.855545	24.5962
BERNOULLI	Urban100	img_097_SRF_2_HR	220	0.813482	23.4599
BERNOULLI	Urban100	img_097_SRF_2_HR	230	0.757937	22.1656
BERNOULLI	Urban100	img_097_SRF_2_HR	240	0.668259	20.862
BERNOULLI	Urban100	img_062_SRF_2_HR	150	0.921311	25.7418
BERNOULLI	Urban100	img_062_SRF_2_HR	160	0.908892	25.0924
BERNOULLI	Urban100	img_062_SRF_2_HR	170	0.89526	24.4148
BERNOULLI	Urban100	img_062_SRF_2_HR	180	0.87839	23.7737
BERNOULLI	Urban100	img_062_SRF_2_HR	190	0.856318	22.9531
BERNOULLI	Urban100	img_062_SRF_2_HR	200	0.823755	22.0267
BERNOULLI	Urban100	img_062_SRF_2_HR	210	0.789915	21.308
BERNOULLI	Urban100	img_062_SRF_2_HR	220	0.734085	20.0646
BERNOULLI	Urban100	img_062_SRF_2_HR	230	0.665109	19.0054
BERNOULLI	Urban100	img_062_SRF_2_HR	240	0.568977	17.7727
BERNOULLI	Urban100	img_069_SRF_2_HR	150	0.933025	28.5489
BERNOULLI	Urban100	img_069_SRF_2_HR	160	0.923665	28.0729
BERNOULLI	Urban100	img_069_SRF_2_HR	170	0.910756	27.321
BERNOULLI	Urban100	img_069_SRF_2_HR	180	0.897807	26.8705
BERNOULLI	Urban100	img_069_SRF_2_HR	190	0.878459	26.1128
BERNOULLI	Urban100	img_069_SRF_2_HR	200	0.860198	25.5141
BERNOULLI	Urban100	img_069_SRF_2_HR	210	0.825337	24.5992
BERNOULLI	Urban100	img_069_SRF_2_HR	220	0.78665	23.6376
BERNOULLI	Urban100	img_069_SRF_2_HR	230	0.724298	22.533
BERNOULLI	Urban100	img_069_SRF_2_HR	240	0.631625	21.1663
BERNOULLI	Urban100	img_047_SRF_2_HR	150	0.925244	25.6791
BERNOULLI	Urban100	img_047_SRF_2_HR	160	0.913598	25.0947
BERNOULLI	Urban100	img_047_SRF_2_HR	170	0.898471	24.2871
BERNOULLI	Urban100	img_047_SRF_2_HR	180	0.885386	23.7674
BERNOULLI	Urban100	img_047_SRF_2_HR	190	0.864142	23.0261
BERNOULLI	Urban100	img_047_SRF_2_HR	200	0.838853	22.395
BERNOULLI	Urban100	img_047_SRF_2_HR	210	0.803963	21.5172
BERNOULLI	Urban100	img_047_SRF_2_HR	220	0.763362	20.7667
BERNOULLI	Urban100	img_047_SRF_2_HR	230	0.694988	19.6628
BERNOULLI	Urban100	img_047_SRF_2_HR	240	0.591314	18.617
BERNOULLI	Urban100	img_039_SRF_2_HR	150	0.921545	27.2985
BERNOULLI	Urban100	img_039_SRF_2_HR	160	0.910356	26.7402
BERNOULLI	Urban100	img_039_SRF_2_HR	170	0.895123	25.9924
BERNOULLI	Urban100	img_039_SRF_2_HR	180	0.874397	25.0889
BERNOULLI	Urban100	img_039_SRF_2_HR	190	0.854424	24.4624
BERNOULLI	Urban100	img_039_SRF_2_HR	200	0.827508	23.6624
BERNOULLI	Urban100	img_039_SRF_2_HR	210	0.788504	22.6479
BERNOULLI	Urban100	img_039_SRF_2_HR	220	0.740385	21.6452
BERNOULLI	Urban100	img_039_SRF_2_HR	230	0.673728	20.3997
BERNOULLI	Urban100	img_039_SRF_2_HR	240	0.578377	18.9871
BERNOULLI	Urban100	img_044_SRF_2_HR	150	0.973017	33.6867
BERNOULLI	Urban100	img_044_SRF_2_HR	160	0.967267	32.8012
BERNOULLI	Urban100	img_044_SRF_2_HR	170	0.959375	31.8338
BERNOULLI	Urban100	img_044_SRF_2_HR	180	0.950344	30.925
BERNOULLI	Urban100	img_044_SRF_2_HR	190	0.935958	29.8584
BERNOULLI	Urban100	img_044_SRF_2_HR	200	0.914085	28.6081
BERNOULLI	Urban100	img_044_SRF_2_HR	210	0.88768	27.5612
BERNOULLI	Urban100	img_044_SRF_2_HR	220	0.840268	25.9011
BERNOULLI	Urban100	img_044_SRF_2_HR	230	0.75597	24.0853
BERNOULLI	Urban100	img_044_SRF_2_HR	240	0.594624	21.8702
BERNOULLI	Urban100	img_082_SRF_2_HR	150	0.977919	34.1932
BERNOULLI	Urban100	img_082_SRF_2_HR	160	0.975051	33.3734
BERNOULLI	Urban100	img_082_SRF_2_HR	170	0.971543	32.5087
BERNOULLI	Urban100	img_082_SRF_2_HR	180	0.967021	31.5198
BERNOULLI	Urban100	img_082_SRF_2_HR	190	0.959835	30.3781
BERNOULLI	Urban100	img_082_SRF_2_HR	200	0.951339	29.3851
BERNOULLI	Urban100	img_082_SRF_2_HR	210	0.940525	28.0815
BERNOULLI	Urban100	img_082_SRF_2_HR	220	0.92202	26.6908
BERNOULLI	Urban100	img_082_SRF_2_HR	230	0.893694	24.7827
BERNOULLI	Urban100	img_082_SRF_2_HR	240	0.835385	22.3225
BERNOULLI	Urban100	img_015_SRF_2_HR	150	0.943041	29.5807
BERNOULLI	Urban100	img_015_SRF_2_HR	160	0.933784	28.786
BERNOULLI	Urban100	img_015_SRF_2_HR	170	0.926062	28.2433
BERNOULLI	Urban100	img_015_SRF_2_HR	180	0.913689	27.4632
BERNOULLI	Urban100	img_015_SRF_2_HR	190	0.900262	26.6248
BERNOULLI	Urban100	img_015_SRF_2_HR	200	0.882172	25.7918
BERNOULLI	Urban100	img_015_SRF_2_HR	210	0.861148	24.8978
BERNOULLI	Urban100	img_015_SRF_2_HR	220	0.82196	23.5592
BERNOULLI	Urban100	img_015_SRF_2_HR	230	0.764991	22.146
BERNOULLI	Urban100	img_015_SRF_2_HR	240	0.674948	20.2774
BERNOULLI	Urban100	img_072_SRF_2_HR	150	0.950382	22.9277
BERNOULLI	Urban100	img_072_SRF_2_HR	160	0.940508	22.1349
BERNOULLI	Urban100	img_072_SRF_2_HR	170	0.930289	21.3565
BERNOULLI	Urban100	img_072_SRF_2_HR	180	0.91576	20.4986
BERNOULLI	Urban100	img_072_SRF_2_HR	190	0.8976	19.6646
BERNOULLI	Urban100	img_072_SRF_2_HR	200	0.86818	18.5194
BERNOULLI	Urban100	img_072_SRF_2_HR	210	0.830188	17.3928
BERNOULLI	Urban100	img_072_SRF_2_HR	220	0.772981	16.0983
BERNOULLI	Urban100	img_072_SRF_2_HR	230	0.683236	14.6439
BERNOULLI	Urban100	img_072_SRF_2_HR	240	0.527527	12.7526
BERNOULLI	Urban100	img_071_SRF_2_HR	150	0.911923	32.6858
BERNOULLI	Urban100	img_071_SRF_2_HR	160	0.900863	32.1465
BERNOULLI	Urban100	img_071_SRF_2_HR	170	0.885844	31.626
BERNOULLI	Urban100	img_071_SRF_2_HR	180	0.868674	30.5767
BERNOULLI	Urban100	img_071_SRF_2_HR	190	0.849595	30.1488
BERNOULLI	Urban100	img_071_SRF_2_HR	200	0.824567	29.2473
BERNOULLI	Urban100	img_071_SRF_2_HR	210	0.793717	28.3491
BERNOULLI	Urban100	img_071_SRF_2_HR	220	0.754342	27.4925
BERNOULLI	Urban100	img_071_SRF_2_HR	230	0.692283	26.3577
BERNOULLI	Urban100	img_071_SRF_2_HR	240	0.591129	24.724
BERNOULLI	Urban100	img_023_SRF_2_HR	150	0.745981	10.1884
BERNOULLI	Urban100	img_023_SRF_2_HR	160	0.742229	10.3076
BERNOULLI	Urban100	img_023_SRF_2_HR	170	0.736406	10.4121
BERNOULLI	Urban100	img_023_SRF_2_HR	180	0.73069	10.4905
BERNOULLI	Urban100	img_023_SRF_2_HR	190	0.722387	10.5641
BERNOULLI	Urban100	img_023_SRF_2_HR	200	0.709963	10.6498
BERNOULLI	Urban100	img_023_SRF_2_HR	210	0.696531	10.8137
BERNOULLI	Urban100	img_023_SRF_2_HR	220	0.668024	10.8979
BERNOULLI	Urban100	img_023_SRF_2_HR	230	0.618714	11.1136
BERNOULLI	Urban100	img_023_SRF_2_HR	240	0.508367	11.2633
BERNOULLI	Urban100	img_051_SRF_2_HR	150	0.950996	29.6475
BERNOULLI	Urban100	img_051_SRF_2_HR	160	0.9425	28.8716
BERNOULLI	Urban100	img_051_SRF_2_HR	170	0.932924	28.2477
BERNOULLI	Urban100	img_051_SRF_2_HR	180	0.921669	27.5047
BERNOULLI	Urban100	img_051_SRF_2_HR	190	0.907168	26.8947
BERNOULLI	Urban100	img_051_SRF_2_HR	200	0.888349	25.9711
BERNOULLI	Urban100	img_051_SRF_2_HR	210	0.863462	25.1285
BERNOULLI	Urban100	img_051_SRF_2_HR	220	0.82549	24.0723
BERNOULLI	Urban100	img_051_SRF_2_HR	230	0.780222	23.0052
BERNOULLI	Urban100	img_051_SRF_2_HR	240	0.682441	21.4573
BERNOULLI	Urban100	img_001_SRF_2_HR	150	0.933559	31.3576
BERNOULLI	Urban100	img_001_SRF_2_HR	160	0.922525	30.5539
BERNOULLI	Urban100	img_001_SRF_2_HR	170	0.914028	29.9344
BERNOULLI	Urban100	img_001_SRF_2_HR	180	0.903232	29.3041
BERNOULLI	Urban100	img_001_SRF_2_HR	190	0.886283	28.347
BERNOULLI	Urban100	img_001_SRF_2_HR	200	0.868699	27.5567
BERNOULLI	Urban100	img_001_SRF_2_HR	210	0.844403	26.5403
BERNOULLI	Urban100	img_001_SRF_2_HR	220	0.808941	25.3536
BERNOULLI	Urban100	img_001_SRF_2_HR	230	0.755523	24.0141
BERNOULLI	Urban100	img_001_SRF_2_HR	240	0.677866	22.2885
BERNOULLI	Urban100	img_004_SRF_2_HR	150	0.923022	24.0709
BERNOULLI	Urban100	img_004_SRF_2_HR	160	0.911165	23.4312
BERNOULLI	Urban100	img_004_SRF_2_HR	170	0.894871	22.7389
BERNOULLI	Urban100	img_004_SRF_2_HR	180	0.86901	21.5955
BERNOULLI	Urban100	img_004_SRF_2_HR	190	0.843627	20.7999
BERNOULLI	Urban100	img_004_SRF_2_HR	200	0.810523	20.0435
BERNOULLI	Urban100	img_004_SRF_2_HR	210	0.769884	19.1326
BERNOULLI	Urban100	img_004_SRF_2_HR	220	0.707657	18.3027
BERNOULLI	Urban100	img_004_SRF_2_HR	230	0.616012	17.2095
BERNOULLI	Urban100	img_004_SRF_2_HR	240	0.500981	16.2519
BERNOULLI	Urban100	img_086_SRF_2_HR	150	0.964534	33.0148
BERNOULLI	Urban100	img_086_SRF_2_HR	160	0.957691	32.1978
BERNOULLI	Urban100	img_086_SRF_2_HR	170	0.952475	31.4746
BERNOULLI	Urban100	img_086_SRF_2_HR	180	0.943722	30.6918
BERNOULLI	Urban100	img_086_SRF_2_HR	190	0.935301	30.1631
BERNOULLI	Urban100	img_086_SRF_2_HR	200	0.921619	29.0409
BERNOULLI	Urban100	img_086_SRF_2_HR	210	0.907323	28.3224
BERNOULLI	Urban100	img_086_SRF_2_HR	220	0.884162	27.0793
BERNOULLI	Urban100	img_086_SRF_2_HR	230	0.85772	25.9088
BERNOULLI	Urban100	img_086_SRF_2_HR	240	0.813291	24.4467
BERNOULLI	Urban100	img_090_SRF_2_HR	150	0.98602	37.5084
BERNOULLI	Urban100	img_090_SRF_2_HR	160	0.981831	35.9207
BERNOULLI	Urban100	img_090_SRF_2_HR	170	0.978822	35.288
BERNOULLI	Urban100	img_090_SRF_2_HR	180	0.974332	34.48
BERNOULLI	Urban100	img_090_SRF_2_HR	190	0.969625	33.979
BERNOULLI	Urban100	img_090_SRF_2_HR	200	0.960356	32.5647
BERNOULLI	Urban100	img_090_SRF_2_HR	210	0.949634	31.5277
BERNOULLI	Urban100	img_090_SRF_2_HR	220	0.928971	30.1081
BERNOULLI	Urban100	img_090_SRF_2_HR	230	0.890719	28.4233
BERNOULLI	Urban100	img_090_SRF_2_HR	240	0.807307	26.2258
BERNOULLI	Urban100	img_005_SRF_2_HR	150	0.968793	28.7467
BERNOULLI	Urban100	img_005_SRF_2_HR	160	0.96533	28.107
BERNOULLI	Urban100	img_005_SRF_2_HR	170	0.960048	27.3109
BERNOULLI	Urban100	img_005_SRF_2_HR	180	0.953327	26.4413
BERNOULLI	Urban100	img_005_SRF_2_HR	190	0.941213	25.2306
BERNOULLI	Urban100	img_005_SRF_2_HR	200	0.930161	24.3811
BERNOULLI	Urban100	img_005_SRF_2_HR	210	0.913565	23.22
BERNOULLI	Urban100	img_005_SRF_2_HR	220	0.88838	21.9641
BERNOULLI	Urban100	img_005_SRF_2_HR	230	0.845676	20.5103
BERNOULLI	Urban100	img_005_SRF_2_HR	240	0.77005	18.6246
BERNOULLI	Urban100	img_040_SRF_2_HR	150	0.988458	30.503
BERNOULLI	Urban100	img_040_SRF_2_HR	160	0.985881	29.5195
BERNOULLI	Urban100	img_040_SRF_2_HR	170	0.982634	28.3698
BERNOULLI	Urban100	img_040_SRF_2_HR	180	0.977973	27.1631
BERNOULLI	Urban100	img_040_SRF_2_HR	190	0.972585	26.3256
BERNOULLI	Urban100	img_040_SRF_2_HR	200	0.961925	24.7086
BERNOULLI	Urban100	img_040_SRF_2_HR	210	0.948841	23.3116
BERNOULLI	Urban100	img_040_SRF_2_HR	220	0.92079	21.441
BERNOULLI	Urban100	img_040_SRF_2_HR	230	0.879002	19.4441
BERNOULLI	Urban100	img_040_SRF_2_HR	240	0.77046	16.3969
BERNOULLI	Urban100	img_002_SRF_2_HR	150	0.959541	30.2857
BERNOULLI	Urban100	img_002_SRF_2_HR	160	0.952319	29.6228
BERNOULLI	Urban100	img_002_SRF_2_HR	170	0.942235	28.6479
BERNOULLI	Urban100	img_002_SRF_2_HR	180	0.931017	28.0358
BERNOULLI	Urban100	img_002_SRF_2_HR	190	0.916426	27.0504
BERNOULLI	Urban100	img_002_SRF_2_HR	200	0.898787	26.3486
BERNOULLI	Urban100	img_002_SRF_2_HR	210	0.875008	25.3096
BERNOULLI	Urban100	img_002_SRF_2_HR	220	0.838353	24.2041
BERNOULLI	Urban100	img_002_SRF_2_HR	230	0.780427	22.8543
BERNOULLI	Urban100	img_002_SRF_2_HR	240	0.683632	21.1455
BERNOULLI	Urban100	img_083_SRF_2_HR	150	0.927312	27.1047
BERNOULLI	Urban100	img_083_SRF_2_HR	160	0.916822	26.4715
BERNOULLI	Urban100	img_083_SRF_2_HR	170	0.904097	25.7192
BERNOULLI	Urban100	img_083_SRF_2_HR	180	0.888993	25.0528
BERNOULLI	Urban100	img_083_SRF_2_HR	190	0.864025	24.203
BERNOULLI	Urban100	img_083_SRF_2_HR	200	0.842677	23.5103
BERNOULLI	Urban100	img_083_SRF_2_HR	210	0.809316	22.6156
BERNOULLI	Urban100	img_083_SRF_2_HR	220	0.75623	21.5305
BERNOULLI	Urban100	img_083_SRF_2_HR	230	0.691239	20.4586
BERNOULLI	Urban100	img_083_SRF_2_HR	240	0.574231	18.7416
BERNOULLI	Urban100	img_008_SRF_2_HR	150	0.906065	25.2325
BERNOULLI	Urban100	img_008_SRF_2_HR	160	0.891047	24.5484
BERNOULLI	Urban100	img_008_SRF_2_HR	170	0.875673	24.025
BERNOULLI	Urban100	img_008_SRF_2_HR	180	0.854124	23.2989
BERNOULLI	Urban100	img_008_SRF_2_HR	190	0.821745	22.5356
BERNOULLI	Urban100	img_008_SRF_2_HR	200	0.789032	21.7423
BERNOULLI	Urban100	img_008_SRF_2_HR	210	0.748268	20.963
BERNOULLI	Urban100	img_008_SRF_2_HR	220	0.67508	19.9847
BERNOULLI	Urban100	img_008_SRF_2_HR	230	0.594802	19.14
BERNOULLI	Urban100	img_008_SRF_2_HR	240	0.459692	17.7903
BERNOULLI	Urban100	img_032_SRF_2_HR	150	0.95175	32.9178
BERNOULLI	Urban100	img_032_SRF_2_HR	160	0.945492	32.3058
BERNOULLI	Urban100	img_032_SRF_2_HR	170	0.937685	31.6616
BERNOULLI	Urban100	img_032_SRF_2_HR	180	0.925337	30.8641
BERNOULLI	Urban100	img_032_SRF_2_HR	190	0.911752	29.9876
BERNOULLI	Urban100	img_032_SRF_2_HR	200	0.893175	29.2514
BERNOULLI	Urban100	img_032_SRF_2_HR	210	0.867301	28.2984
BERNOULLI	Urban100	img_032_SRF_2_HR	220	0.826461	26.997
BERNOULLI	Urban100	img_032_SRF_2_HR	230	0.782543	25.7814
BERNOULLI	Urban100	img_032_SRF_2_HR	240	0.718667	24.3605
BERNOULLI	Urban100	img_028_SRF_2_HR	150	0.970243	34.0096
BERNOULLI	Urban100	img_028_SRF_2_HR	160	0.966339	33.1657
BERNOULLI	Urban100	img_028_SRF_2_HR	170	0.960596	32.4146
BERNOULLI	Urban100	img_028_SRF_2_HR	180	0.95271	31.6659
BERNOULLI	Urban100	img_028_SRF_2_HR	190	0.948554	31.5184
BERNOULLI	Urban100	img_028_SRF_2_HR	200	0.93581	30.1426
BERNOULLI	Urban100	img_028_SRF_2_HR	210	0.921402	29.0512
BERNOULLI	Urban100	img_028_SRF_2_HR	220	0.899817	28.0197
BERNOULLI	Urban100	img_028_SRF_2_HR	230	0.865896	26.4392
BERNOULLI	Urban100	img_028_SRF_2_HR	240	0.798366	24.8536
BERNOULLI	Urban100	img_012_SRF_2_HR	150	0.927334	28.2501
BERNOULLI	Urban100	img_012_SRF_2_HR	160	0.91438	27.4559
BERNOULLI	Urban100	img_012_SRF_2_HR	170	0.903794	27.1243
BERNOULLI	Urban100	img_012_SRF_2_HR	180	0.887226	26.316
BERNOULLI	Urban100	img_012_SRF_2_HR	190	0.869927	25.7284
BERNOULLI	Urban100	img_012_SRF_2_HR	200	0.845012	25.0415
BERNOULLI	Urban100	img_012_SRF_2_HR	210	0.820271	24.3808
BERNOULLI	Urban100	img_012_SRF_2_HR	220	0.778148	23.5379
BERNOULLI	Urban100	img_012_SRF_2_HR	230	0.720818	22.5769
BERNOULLI	Urban100	img_012_SRF_2_HR	240	0.624709	20.9579
BERNOULLI	Urban100	img_061_SRF_2_HR	150	0.923626	28.024
BERNOULLI	Urban100	img_061_SRF_2_HR	160	0.914964	27.5541
BERNOULLI	Urban100	img_061_SRF_2_HR	170	0.900345	26.8892
BERNOULLI	Urban100	img_061_SRF_2_HR	180	0.882968	26.1456
BERNOULLI	Urban100	img_061_SRF_2_HR	190	0.863263	25.4712
BERNOULLI	Urban100	img_061_SRF_2_HR	200	0.838019	24.767
BERNOULLI	Urban100	img_061_SRF_2_HR	210	0.806181	23.8632
BERNOULLI	Urban100	img_061_SRF_2_HR	220	0.762103	22.9725
BERNOULLI	Urban100	img_061_SRF_2_HR	230	0.697944	21.9331
BERNOULLI	Urban100	img_061_SRF_2_HR	240	0.595712	20.4141
BERNOULLI	Urban100	img_009_SRF_2_HR	150	0.981673	38.5376
BERNOULLI	Urban100	img_009_SRF_2_HR	160	0.979355	37.8385
BERNOULLI	Urban100	img_009_SRF_2_HR	170	0.975096	36.8533
BERNOULLI	Urban100	img_009_SRF_2_HR	180	0.972382	36.2799
BERNOULLI	Urban100	img_009_SRF_2_HR	190	0.966636	35.4764
BERNOULLI	Urban100	img_009_SRF_2_HR	200	0.957224	34.4083
BERNOULLI	Urban100	img_009_SRF_2_HR	210	0.944579	33.0821
BERNOULLI	Urban100	img_009_SRF_2_HR	220	0.927513	32.0062
BERNOULLI	Urban100	img_009_SRF_2_HR	230	0.90164	30.7701
BERNOULLI	Urban100	img_009_SRF_2_HR	240	0.831565	28.6416
BERNOULLI	Urban100	img_026_SRF_2_HR	150	0.965205	35.5996
BERNOULLI	Urban100	img_026_SRF_2_HR	160	0.96073	34.6726
BERNOULLI	Urban100	img_026_SRF_2_HR	170	0.954151	33.995
BERNOULLI	Urban100	img_026_SRF_2_HR	180	0.946805	32.928
BERNOULLI	Urban100	img_026_SRF_2_HR	190	0.93776	32.3625
BERNOULLI	Urban100	img_026_SRF_2_HR	200	0.925619	31.1725
BERNOULLI	Urban100	img_026_SRF_2_HR	210	0.907241	29.8849
BERNOULLI	Urban100	img_026_SRF_2_HR	220	0.881504	28.5919
BERNOULLI	Urban100	img_026_SRF_2_HR	230	0.841079	27.2422
BERNOULLI	Urban100	img_026_SRF_2_HR	240	0.762892	25.0094
BERNOULLI	Urban100	img_080_SRF_2_HR	150	0.981207	38.5313
BERNOULLI	Urban100	img_080_SRF_2_HR	160	0.978039	37.6972
BERNOULLI	Urban100	img_080_SRF_2_HR	170	0.974778	36.9074
BERNOULLI	Urban100	img_080_SRF_2_HR	180	0.970402	36.3052
BERNOULLI	Urban100	img_080_SRF_2_HR	190	0.964543	35.3287
BERNOULLI	Urban100	img_080_SRF_2_HR	200	0.956434	34.3099
BERNOULLI	Urban100	img_080_SRF_2_HR	210	0.944395	33.1753
BERNOULLI	Urban100	img_080_SRF_2_HR	220	0.92927	32.1022
BERNOULLI	Urban100	img_080_SRF_2_HR	230	0.902389	30.6349
BERNOULLI	Urban100	img_080_SRF_2_HR	240	0.862639	28.9653
BERNOULLI	Urban100	img_025_SRF_2_HR	150	0.978676	35.6137
BERNOULLI	Urban100	img_025_SRF_2_HR	160	0.975433	34.836
BERNOULLI	Urban100	img_025_SRF_2_HR	170	0.971525	34.0494
BERNOULLI	Urban100	img_025_SRF_2_HR	180	0.965733	33.079
BERNOULLI	Urban100	img_025_SRF_2_HR	190	0.959091	32.047
BERNOULLI	Urban100	img_025_SRF_2_HR	200	0.951064	30.8904
BERNOULLI	Urban100	img_025_SRF_2_HR	210	0.937578	29.4903
BERNOULLI	Urban100	img_025_SRF_2_HR	220	0.920066	28.0575
BERNOULLI	Urban100	img_025_SRF_2_HR	230	0.888521	25.9475
BERNOULLI	Urban100	img_025_SRF_2_HR	240	0.82014	22.9833
BERNOULLI	Urban100	img_094_SRF_2_HR	150	0.945698	31.8241
BERNOULLI	Urban100	img_094_SRF_2_HR	160	0.937333	31.1111
BERNOULLI	Urban100	img_094_SRF_2_HR	170	0.927872	30.4556
BERNOULLI	Urban100	img_094_SRF_2_HR	180	0.916161	29.7204
BERNOULLI	Urban100	img_094_SRF_2_HR	190	0.902934	28.9433
BERNOULLI	Urban100	img_094_SRF_2_HR	200	0.887612	28.289
BERNOULLI	Urban100	img_094_SRF_2_HR	210	0.861142	27.0837
BERNOULLI	Urban100	img_094_SRF_2_HR	220	0.831655	26.1316
BERNOULLI	Urban100	img_094_SRF_2_HR	230	0.782526	25.0639
BERNOULLI	Urban100	img_094_SRF_2_HR	240	0.703826	23.4289
BERNOULLI	Urban100	img_030_SRF_2_HR	150	0.951489	27.7236
BERNOULLI	Urban100	img_030_SRF_2_HR	160	0.940993	26.7819
BERNOULLI	Urban100	img_030_SRF_2_HR	170	0.930694	26.0971
BERNOULLI	Urban100	img_030_SRF_2_HR	180	0.919229	25.4051
BERNOULLI	Urban100	img_030_SRF_2_HR	190	0.898153	24.4413
BERNOULLI	Urban100	img_030_SRF_2_HR	200	0.870933	23.2428
BERNOULLI	Urban100	img_030_SRF_2_HR	210	0.841078	22.3342
BERNOULLI	Urban100	img_030_SRF_2_HR	220	0.7876	20.9008
BERNOULLI	Urban100	img_030_SRF_2_HR	230	0.713768	19.585
BERNOULLI	Urban100	img_030_SRF_2_HR	240	0.574047	17.7494
BERNOULLI	Urban100	img_048_SRF_2_HR	150	0.919821	22.6766
BERNOULLI	Urban100	img_048_SRF_2_HR	160	0.905551	21.9818
BERNOULLI	Urban100	img_048_SRF_2_HR	170	0.889851	21.392
BERNOULLI	Urban100	img_048_SRF_2_HR	180	0.874978	20.8799
BERNOULLI	Urban100	img_048_SRF_2_HR	190	0.8521	20.152
BERNOULLI	Urban100	img_048_SRF_2_HR	200	0.826574	19.5621
BERNOULLI	Urban100	img_048_SRF_2_HR	210	0.795901	18.8104
BERNOULLI	Urban100	img_048_SRF_2_HR	220	0.758213	18.0849
BERNOULLI	Urban100	img_048_SRF_2_HR	230	0.699207	17.2123
BERNOULLI	Urban100	img_048_SRF_2_HR	240	0.621425	16.1811
BERNOULLI	Urban100	img_037_SRF_2_HR	150	0.925229	27.1446
BERNOULLI	Urban100	img_037_SRF_2_HR	160	0.913273	26.4742
BERNOULLI	Urban100	img_037_SRF_2_HR	170	0.896607	25.6775
BERNOULLI	Urban100	img_037_SRF_2_HR	180	0.876705	24.7543
BERNOULLI	Urban100	img_037_SRF_2_HR	190	0.857584	24.1802
BERNOULLI	Urban100	img_037_SRF_2_HR	200	0.829849	23.3834
BERNOULLI	Urban100	img_037_SRF_2_HR	210	0.795779	22.4719
BERNOULLI	Urban100	img_037_SRF_2_HR	220	0.748493	21.4486
BERNOULLI	Urban100	img_037_SRF_2_HR	230	0.683354	20.2572
BERNOULLI	Urban100	img_037_SRF_2_HR	240	0.591137	19.1696
BERNOULLI	Urban100	img_057_SRF_2_HR	150	0.954814	31.1964
BERNOULLI	Urban100	img_057_SRF_2_HR	160	0.9461	30.1849
BERNOULLI	Urban100	img_057_SRF_2_HR	170	0.935492	29.2539
BERNOULLI	Urban100	img_057_SRF_2_HR	180	0.923211	28.5294
BERNOULLI	Urban100	img_057_SRF_2_HR	190	0.90629	27.4283
BERNOULLI	Urban100	img_057_SRF_2_HR	200	0.885715	26.521
BERNOULLI	Urban100	img_057_SRF_2_HR	210	0.860569	25.1726
BERNOULLI	Urban100	img_057_SRF_2_HR	220	0.828798	24.2998
BERNOULLI	Urban100	img_057_SRF_2_HR	230	0.773119	22.6301
BERNOULLI	Urban100	img_057_SRF_2_HR	240	0.694308	20.8715
BERNOULLI	Urban100	img_093_SRF_2_HR	150	0.96394	30.4081
BERNOULLI	Urban100	img_093_SRF_2_HR	160	0.959962	29.7768
BERNOULLI	Urban100	img_093_SRF_2_HR	170	0.953989	28.8361
BERNOULLI	Urban100	img_093_SRF_2_HR	180	0.944611	27.8769
BERNOULLI	Urban100	img_093_SRF_2_HR	190	0.933323	26.8326
BERNOULLI	Urban100	img_093_SRF_2_HR	200	0.919695	25.6692
BERNOULLI	Urban100	img_093_SRF_2_HR	210	0.895803	24.2598
BERNOULLI	Urban100	img_093_SRF_2_HR	220	0.862439	22.6323
BERNOULLI	Urban100	img_093_SRF_2_HR	230	0.800365	20.483
BERNOULLI	Urban100	img_093_SRF_2_HR	240	0.670196	17.7347
BERNOULLI	Urban100	img_003_SRF_2_HR	150	0.906635	27.8977
BERNOULLI	Urban100	img_003_SRF_2_HR	160	0.891558	27.2643
BERNOULLI	Urban100	img_003_SRF_2_HR	170	0.878021	26.686
BERNOULLI	Urban100	img_003_SRF_2_HR	180	0.860774	26.0522
BERNOULLI	Urban100	img_003_SRF_2_HR	190	0.836775	25.2788
BERNOULLI	Urban100	img_003_SRF_2_HR	200	0.812878	24.611
BERNOULLI	Urban100	img_003_SRF_2_HR	210	0.775714	23.7437
BERNOULLI	Urban100	img_003_SRF_2_HR	220	0.72623	22.7154
BERNOULLI	Urban100	img_003_SRF_2_HR	230	0.660522	21.5988
BERNOULLI	Urban100	img_003_SRF_2_HR	240	0.556436	20.1181
BERNOULLI	Urban100	img_021_SRF_2_HR	150	0.93145	33.0624
BERNOULLI	Urban100	img_021_SRF_2_HR	160	0.922868	32.3092
BERNOULLI	Urban100	img_021_SRF_2_HR	170	0.914934	31.7531
BERNOULLI	Urban100	img_021_SRF_2_HR	180	0.902656	30.8653
BERNOULLI	Urban100	img_021_SRF_2_HR	190	0.889836	30.0195
BERNOULLI	Urban100	img_021_SRF_2_HR	200	0.874972	29.1938
BERNOULLI	Urban100	img_021_SRF_2_HR	210	0.855679	28.2739
BERNOULLI	Urban100	img_021_SRF_2_HR	220	0.829164	27.0543
BERNOULLI	Urban100	img_021_SRF_2_HR	230	0.791187	25.8681
BERNOULLI	Urban100	img_021_SRF_2_HR	240	0.717114	23.9749
BERNOULLI	Urban100	img_064_SRF_2_HR	150	0.953969	30.8145
BERNOULLI	Urban100	img_064_SRF_2_HR	160	0.946287	30.0728
BERNOULLI	Urban100	img_064_SRF_2_HR	170	0.934879	29.1561
BERNOULLI	Urban100	img_064_SRF_2_HR	180	0.921943	28.2587
BERNOULLI	Urban100	img_064_SRF_2_HR	190	0.907309	27.433
BERNOULLI	Urban100	img_064_SRF_2_HR	200	0.888034	26.5563
BERNOULLI	Urban100	img_064_SRF_2_HR	210	0.857394	25.5304
BERNOULLI	Urban100	img_064_SRF_2_HR	220	0.825084	24.4626
BERNOULLI	Urban100	img_064_SRF_2_HR	230	0.772811	23.3186
BERNOULLI	Urban100	img_064_SRF_2_HR	240	0.6787	21.5647
BERNOULLI	Urban100	img_091_SRF_2_HR	150	0.899827	26.8083
BERNOULLI	Urban100	img_091_SRF_2_HR	160	0.885386	26.3146
BERNOULLI	Urban100	img_091_SRF_2_HR	170	0.86669	25.5771
BERNOULLI	Urban100	img_091_SRF_2_HR	180	0.849416	25.0255
BERNOULLI	Urban100	img_091_SRF_2_HR	190	0.817736	24.2264
BERNOULLI	Urban100	img_091_SRF_2_HR	200	0.785823	23.4678
BERNOULLI	Urban100	img_091_SRF_2_HR	210	0.744444	22.7937
BERNOULLI	Urban100	img_091_SRF_2_HR	220	0.687497	21.7632
BERNOULLI	Urban100	img_091_SRF_2_HR	230	0.616414	20.758
BERNOULLI	Urban100	img_091_SRF_2_HR	240	0.504982	19.5345
BERNOULLI	Urban100	img_011_SRF_2_HR	150	0.955242	25.6026
BERNOULLI	Urban100	img_011_SRF_2_HR	160	0.94906	24.9577
BERNOULLI	Urban100	img_011_SRF_2_HR	170	0.943116	24.3707
BERNOULLI	Urban100	img_011_SRF_2_HR	180	0.934094	23.4106
BERNOULLI	Urban100	img_011_SRF_2_HR	190	0.91974	22.3045
BERNOULLI	Urban100	img_011_SRF_2_HR	200	0.898144	20.973
BERNOULLI	Urban100	img_011_SRF_2_HR	210	0.871306	19.7581
BERNOULLI	Urban100	img_011_SRF_2_HR	220	0.832519	18.2394
BERNOULLI	Urban100	img_011_SRF_2_HR	230	0.771132	16.4398
BERNOULLI	Urban100	img_011_SRF_2_HR	240	0.651794	14.1859
BERNOULLI	Urban100	img_031_SRF_2_HR	150	0.864895	22.95
BERNOULLI	Urban100	img_031_SRF_2_HR	160	0.854622	22.5071
BERNOULLI	Urban100	img_031_SRF_2_HR	170	0.840203	22.347
BERNOULLI	Urban100	img_031_SRF_2_HR	180	0.824978	22.4295
BERNOULLI	Urban100	img_031_SRF_2_HR	190	0.807164	21.7611
BERNOULLI	Urban100	img_031_SRF_2_HR	200	0.780539	20.8055
BERNOULLI	Urban100	img_031_SRF_2_HR	210	0.744109	20.2304
BERNOULLI	Urban100	img_031_SRF_2_HR	220	0.706996	19.9745
BERNOULLI	Urban100	img_031_SRF_2_HR	230	0.65356	19.0028
BERNOULLI	Urban100	img_031_SRF_2_HR	240	0.5614	18.4776
BERNOULLI	Urban100	img_035_SRF_2_HR	150	0.96994	31.8935
BERNOULLI	Urban100	img_035_SRF_2_HR	160	0.965676	31.2355
BERNOULLI	Urban100	img_035_SRF_2_HR	170	0.960494	30.3978
BERNOULLI	Urban100	img_035_SRF_2_HR	180	0.950254	29.3677
BERNOULLI	Urban100	img_035_SRF_2_HR	190	0.940521	28.1859
BERNOULLI	Urban100	img_035_SRF_2_HR	200	0.925848	27.2219
BERNOULLI	Urban100	img_035_SRF_2_HR	210	0.904869	25.9575
BERNOULLI	Urban100	img_035_SRF_2_HR	220	0.878373	24.6203
BERNOULLI	Urban100	img_035_SRF_2_HR	230	0.826597	23.0226
BERNOULLI	Urban100	img_035_SRF_2_HR	240	0.734393	21.0485
BERNOULLI	Urban100	img_098_SRF_2_HR	150	0.856039	25.6989
BERNOULLI	Urban100	img_098_SRF_2_HR	160	0.84044	25.3005
BERNOULLI	Urban100	img_098_SRF_2_HR	170	0.818183	24.665
BERNOULLI	Urban100	img_098_SRF_2_HR	180	0.793814	24.0911
BERNOULLI	Urban100	img_098_SRF_2_HR	190	0.766672	23.5168
BERNOULLI	Urban100	img_098_SRF_2_HR	200	0.727378	22.7615
BERNOULLI	Urban100	img_098_SRF_2_HR	210	0.684521	22.1937
BERNOULLI	Urban100	img_098_SRF_2_HR	220	0.630424	21.3183
BERNOULLI	Urban100	img_098_SRF_2_HR	230	0.556603	20.4441
BERNOULLI	Urban100	img_098_SRF_2_HR	240	0.445103	19.3954
BERNOULLI	Urban100	img_046_SRF_2_HR	150	0.935286	29.6476
BERNOULLI	Urban100	img_046_SRF_2_HR	160	0.9266	29.1794
BERNOULLI	Urban100	img_046_SRF_2_HR	170	0.9173	28.5648
BERNOULLI	Urban100	img_046_SRF_2_HR	180	0.906097	28.035
BERNOULLI	Urban100	img_046_SRF_2_HR	190	0.891381	27.473
BERNOULLI	Urban100	img_046_SRF_2_HR	200	0.872346	26.7327
BERNOULLI	Urban100	img_046_SRF_2_HR	210	0.846324	25.973
BERNOULLI	Urban100	img_046_SRF_2_HR	220	0.817568	25.2425
BERNOULLI	Urban100	img_046_SRF_2_HR	230	0.769203	24.1984
BERNOULLI	Urban100	img_046_SRF_2_HR	240	0.703044	22.9795
BERNOULLI	Urban100	img_092_SRF_2_HR	150	0.912443	24.6968
BERNOULLI	Urban100	img_092_SRF_2_HR	160	0.898579	24.0004
BERNOULLI	Urban100	img_092_SRF_2_HR	170	0.883488	23.3498
BERNOULLI	Urban100	img_092_SRF_2_HR	180	0.861277	22.5344
BERNOULLI	Urban100	img_092_SRF_2_HR	190	0.841022	21.9298
BERNOULLI	Urban100	img_092_SRF_2_HR	200	0.805465	20.9554
BERNOULLI	Urban100	img_092_SRF_2_HR	210	0.75794	19.9774
BERNOULLI	Urban100	img_092_SRF_2_HR	220	0.711659	19.2118
BERNOULLI	Urban100	img_092_SRF_2_HR	230	0.639192	18.1534
BERNOULLI	Urban100	img_092_SRF_2_HR	240	0.533449	16.9
BERNOULLI	Urban100	img_055_SRF_2_HR	150	0.981759	36.3464
BERNOULLI	Urban100	img_055_SRF_2_HR	160	0.978608	35.1243
BERNOULLI	Urban100	img_055_SRF_2_HR	170	0.973768	33.9829
BERNOULLI	Urban100	img_055_SRF_2_HR	180	0.968803	33.0805
BERNOULLI	Urban100	img_055_SRF_2_HR	190	0.961617	31.688
BERNOULLI	Urban100	img_055_SRF_2_HR	200	0.948799	30.4063
BERNOULLI	Urban100	img_055_SRF_2_HR	210	0.932354	28.5659
BERNOULLI	Urban100	img_055_SRF_2_HR	220	0.901021	26.6593
BERNOULLI	Urban100	img_055_SRF_2_HR	230	0.854179	24.4639
BERNOULLI	Urban100	img_055_SRF_2_HR	240	0.754016	21.9538
BERNOULLI	Urban100	img_075_SRF_2_HR	150	0.969116	35.1372
BERNOULLI	Urban100	img_075_SRF_2_HR	160	0.963851	34.2284
BERNOULLI	Urban100	img_075_SRF_2_HR	170	0.958356	33.3803
BERNOULLI	Urban100	img_075_SRF_2_HR	180	0.953088	32.7261
BERNOULLI	Urban100	img_075_SRF_2_HR	190	0.943392	31.566
BERNOULLI	Urban100	img_075_SRF_2_HR	200	0.933589	30.6696
BERNOULLI	Urban100	img_075_SRF_2_HR	210	0.921929	29.6126
BERNOULLI	Urban100	img_075_SRF_2_HR	220	0.900505	27.8404
BERNOULLI	Urban100	img_075_SRF_2_HR	230	0.865214	26.2024
BERNOULLI	Urban100	img_075_SRF_2_HR	240	0.810587	23.6606
BERNOULLI	Urban100	img_036_SRF_2_HR	150	0.96584	32.119
BERNOULLI	Urban100	img_036_SRF_2_HR	160	0.960804	31.3046
BERNOULLI	Urban100	img_036_SRF_2_HR	170	0.954937	30.7227
BERNOULLI	Urban100	img_036_SRF_2_HR	180	0.945865	29.6886
BERNOULLI	Urban100	img_036_SRF_2_HR	190	0.933278	28.7535
BERNOULLI	Urban100	img_036_SRF_2_HR	200	0.919325	27.6011
BERNOULLI	Urban100	img_036_SRF_2_HR	210	0.895988	26.4756
BERNOULLI	Urban100	img_036_SRF_2_HR	220	0.864723	25.0037
BERNOULLI	Urban100	img_036_SRF_2_HR	230	0.815236	23.2691
BERNOULLI	Urban100	img_036_SRF_2_HR	240	0.724783	21.4093
BERNOULLI	Urban100	img_018_SRF_2_HR	150	0.902127	29.2884
BERNOULLI	Urban100	img_018_SRF_2_HR	160	0.891022	28.7107
BERNOULLI	Urban100	img_018_SRF_2_HR	170	0.875006	28.1676
BERNOULLI	Urban100	img_018_SRF_2_HR	180	0.85628	27.4808
BERNOULLI	Urban100	img_018_SRF_2_HR	190	0.83551	26.8316
BERNOULLI	Urban100	img_018_SRF_2_HR	200	0.807603	26.0332
BERNOULLI	Urban100	img_018_SRF_2_HR	210	0.766088	25.1503
BERNOULLI	Urban100	img_018_SRF_2_HR	220	0.721387	24.1631
BERNOULLI	Urban100	img_018_SRF_2_HR	230	0.649262	22.8786
BERNOULLI	Urban100	img_018_SRF_2_HR	240	0.537467	21.279
BERNOULLI	Urban100	img_014_SRF_2_HR	150	0.929185	28.5401
BERNOULLI	Urban100	img_014_SRF_2_HR	160	0.918513	27.9341
BERNOULLI	Urban100	img_014_SRF_2_HR	170	0.906864	27.3403
BERNOULLI	Urban100	img_014_SRF_2_HR	180	0.89132	26.738
BERNOULLI	Urban100	img_014_SRF_2_HR	190	0.873342	26.0187
BERNOULLI	Urban100	img_014_SRF_2_HR	200	0.850406	25.357
BERNOULLI	Urban100	img_014_SRF_2_HR	210	0.821994	24.6608
BERNOULLI	Urban100	img_014_SRF_2_HR	220	0.779332	23.7126
BERNOULLI	Urban100	img_014_SRF_2_HR	230	0.72413	22.7483
BERNOULLI	Urban100	img_014_SRF_2_HR	240	0.631161	21.4355
BERNOULLI	Urban100	img_027_SRF_2_HR	150	0.957249	33.5806
BERNOULLI	Urban100	img_027_SRF_2_HR	160	0.951668	32.9119
BERNOULLI	Urban100	img_027_SRF_2_HR	170	0.944465	32.3307
BERNOULLI	Urban100	img_027_SRF_2_HR	180	0.935558	31.6077
BERNOULLI	Urban100	img_027_SRF_2_HR	190	0.925238	30.8369
BERNOULLI	Urban100	img_027_SRF_2_HR	200	0.911221	30.0085
BERNOULLI	Urban100	img_027_SRF_2_HR	210	0.891107	28.9907
BERNOULLI	Urban100	img_027_SRF_2_HR	220	0.865404	28.0467
BERNOULLI	Urban100	img_027_SRF_2_HR	230	0.826841	26.86
BERNOULLI	Urban100	img_027_SRF_2_HR	240	0.766045	25.2606
BERNOULLI	Urban100	img_042_SRF_2_HR	150	0.974039	31.7594
BERNOULLI	Urban100	img_042_SRF_2_HR	160	0.968908	30.7821
BERNOULLI	Urban100	img_042_SRF_2_HR	170	0.96323	29.8106
BERNOULLI	Urban100	img_042_SRF_2_HR	180	0.954446	28.9384
BERNOULLI	Urban100	img_042_SRF_2_HR	190	0.945699	27.9996
BERNOULLI	Urban100	img_042_SRF_2_HR	200	0.931351	26.7861
BERNOULLI	Urban100	img_042_SRF_2_HR	210	0.9116	25.672
BERNOULLI	Urban100	img_042_SRF_2_HR	220	0.884803	24.2983
BERNOULLI	Urban100	img_042_SRF_2_HR	230	0.831711	22.6371
[truncated: 4,937 more rows]
