# Supplementary material for: MPDenoiseNet: Resource-Efficient Deep Learning Approach for Image Denoising
Source: Research Square preprint supplement (doi:10.21203/rs.3.rs-6641644/v1), 2025-05-20
Supplement: Supplementary file 3 [file ablation_no_anisotropic.xlsx]

## Sheet: Sheet1
noise_type	dataset	im_index	noise_parameter	SSIM	PSNR
BERNOULLI	Kodak24	kodim24	150	0.917762	27.7869
BERNOULLI	Kodak24	kodim24	160	0.905998	27.2963
BERNOULLI	Kodak24	kodim24	170	0.89162	26.7259
BERNOULLI	Kodak24	kodim24	180	0.875045	26.101
BERNOULLI	Kodak24	kodim24	190	0.85523	25.5197
BERNOULLI	Kodak24	kodim24	200	0.832204	24.9896
BERNOULLI	Kodak24	kodim24	210	0.801805	24.3624
BERNOULLI	Kodak24	kodim24	220	0.764654	23.6249
BERNOULLI	Kodak24	kodim24	230	0.709329	22.7914
BERNOULLI	Kodak24	kodim24	240	0.63664	21.798
BERNOULLI	Kodak24	kodim15	150	0.937862	31.4388
BERNOULLI	Kodak24	kodim15	160	0.930724	31.2098
BERNOULLI	Kodak24	kodim15	170	0.921761	30.9381
BERNOULLI	Kodak24	kodim15	180	0.912238	30.551
BERNOULLI	Kodak24	kodim15	190	0.90159	30.2331
BERNOULLI	Kodak24	kodim15	200	0.88868	29.9313
BERNOULLI	Kodak24	kodim15	210	0.873674	29.0909
BERNOULLI	Kodak24	kodim15	220	0.851872	28.6709
BERNOULLI	Kodak24	kodim15	230	0.827388	27.9956
BERNOULLI	Kodak24	kodim15	240	0.790984	26.4924
BERNOULLI	Kodak24	kodim17	150	0.952753	33.6929
BERNOULLI	Kodak24	kodim17	160	0.946922	33.1555
BERNOULLI	Kodak24	kodim17	170	0.939763	32.6054
BERNOULLI	Kodak24	kodim17	180	0.930718	31.8376
BERNOULLI	Kodak24	kodim17	190	0.921618	31.3234
BERNOULLI	Kodak24	kodim17	200	0.908443	30.5263
BERNOULLI	Kodak24	kodim17	210	0.892756	29.9203
BERNOULLI	Kodak24	kodim17	220	0.866823	28.5422
BERNOULLI	Kodak24	kodim17	230	0.837248	27.888
BERNOULLI	Kodak24	kodim17	240	0.786497	26.5038
BERNOULLI	Kodak24	kodim03	150	0.962708	32.7571
BERNOULLI	Kodak24	kodim03	160	0.957277	32.4935
BERNOULLI	Kodak24	kodim03	170	0.95122	32.1417
BERNOULLI	Kodak24	kodim03	180	0.944043	31.8488
BERNOULLI	Kodak24	kodim03	190	0.933747	31.4879
BERNOULLI	Kodak24	kodim03	200	0.9222	31.1716
BERNOULLI	Kodak24	kodim03	210	0.908585	30.6901
BERNOULLI	Kodak24	kodim03	220	0.888346	29.9846
BERNOULLI	Kodak24	kodim03	230	0.866382	29.5905
BERNOULLI	Kodak24	kodim03	240	0.832511	28.6349
BERNOULLI	Kodak24	kodim06	150	0.913101	28.6995
BERNOULLI	Kodak24	kodim06	160	0.900609	28.3417
BERNOULLI	Kodak24	kodim06	170	0.885748	27.7993
BERNOULLI	Kodak24	kodim06	180	0.867895	27.328
BERNOULLI	Kodak24	kodim06	190	0.849118	26.7968
BERNOULLI	Kodak24	kodim06	200	0.822464	26.2056
BERNOULLI	Kodak24	kodim06	210	0.793629	25.6693
BERNOULLI	Kodak24	kodim06	220	0.753345	24.975
BERNOULLI	Kodak24	kodim06	230	0.698538	24.1491
BERNOULLI	Kodak24	kodim06	240	0.624037	23.1811
BERNOULLI	Kodak24	kodim02	150	0.921247	31.6967
BERNOULLI	Kodak24	kodim02	160	0.91188	31.4791
BERNOULLI	Kodak24	kodim02	170	0.900168	31.2243
BERNOULLI	Kodak24	kodim02	180	0.890332	31.1102
BERNOULLI	Kodak24	kodim02	190	0.875461	30.8801
BERNOULLI	Kodak24	kodim02	200	0.861116	30.507
BERNOULLI	Kodak24	kodim02	210	0.841645	30.2374
BERNOULLI	Kodak24	kodim02	220	0.819361	29.7379
BERNOULLI	Kodak24	kodim02	230	0.7888	29.2627
BERNOULLI	Kodak24	kodim02	240	0.745284	28.4132
BERNOULLI	Kodak24	kodim14	150	0.91144	29.0642
BERNOULLI	Kodak24	kodim14	160	0.898274	28.5923
BERNOULLI	Kodak24	kodim14	170	0.883615	28.2489
BERNOULLI	Kodak24	kodim14	180	0.86539	27.7376
BERNOULLI	Kodak24	kodim14	190	0.843457	27.2245
BERNOULLI	Kodak24	kodim14	200	0.817221	26.6912
BERNOULLI	Kodak24	kodim14	210	0.786868	26.0034
BERNOULLI	Kodak24	kodim14	220	0.743978	25.1896
BERNOULLI	Kodak24	kodim14	230	0.690835	24.3493
BERNOULLI	Kodak24	kodim14	240	0.61373	23.1854
BERNOULLI	Kodak24	kodim07	150	0.973209	32.9914
BERNOULLI	Kodak24	kodim07	160	0.968886	32.5175
BERNOULLI	Kodak24	kodim07	170	0.964078	32.0841
BERNOULLI	Kodak24	kodim07	180	0.959068	31.662
BERNOULLI	Kodak24	kodim07	190	0.952011	31.0639
BERNOULLI	Kodak24	kodim07	200	0.941899	30.3287
BERNOULLI	Kodak24	kodim07	210	0.929972	29.6845
BERNOULLI	Kodak24	kodim07	220	0.911835	28.7637
BERNOULLI	Kodak24	kodim07	230	0.88346	27.4623
BERNOULLI	Kodak24	kodim07	240	0.833979	25.8752
BERNOULLI	Kodak24	kodim20	150	0.945309	31.684
BERNOULLI	Kodak24	kodim20	160	0.938421	31.2108
BERNOULLI	Kodak24	kodim20	170	0.931539	30.9033
BERNOULLI	Kodak24	kodim20	180	0.921906	30.3147
BERNOULLI	Kodak24	kodim20	190	0.914519	29.9131
BERNOULLI	Kodak24	kodim20	200	0.902104	29.1913
BERNOULLI	Kodak24	kodim20	210	0.887469	28.4495
BERNOULLI	Kodak24	kodim20	220	0.870488	27.6589
BERNOULLI	Kodak24	kodim20	230	0.850442	26.5833
BERNOULLI	Kodak24	kodim20	240	0.819139	25.2923
BERNOULLI	Kodak24	kodim11	150	0.922196	30.0749
BERNOULLI	Kodak24	kodim11	160	0.910011	29.516
BERNOULLI	Kodak24	kodim11	170	0.897746	29.1224
BERNOULLI	Kodak24	kodim11	180	0.883278	28.5721
BERNOULLI	Kodak24	kodim11	190	0.864626	27.9951
BERNOULLI	Kodak24	kodim11	200	0.842731	27.4748
BERNOULLI	Kodak24	kodim11	210	0.817307	26.7984
BERNOULLI	Kodak24	kodim11	220	0.784383	26.0975
BERNOULLI	Kodak24	kodim11	230	0.737674	25.2146
BERNOULLI	Kodak24	kodim11	240	0.675478	24.2196
BERNOULLI	Kodak24	kodim12	150	0.94481	33.5052
BERNOULLI	Kodak24	kodim12	160	0.936975	33.1394
BERNOULLI	Kodak24	kodim12	170	0.928913	32.7912
BERNOULLI	Kodak24	kodim12	180	0.919327	32.2495
BERNOULLI	Kodak24	kodim12	190	0.908614	31.7211
BERNOULLI	Kodak24	kodim12	200	0.894121	31.0759
BERNOULLI	Kodak24	kodim12	210	0.877744	30.2238
BERNOULLI	Kodak24	kodim12	220	0.855632	29.3815
BERNOULLI	Kodak24	kodim12	230	0.827097	28.4656
BERNOULLI	Kodak24	kodim12	240	0.781387	26.933
BERNOULLI	Kodak24	kodim09	150	0.951667	32.7484
BERNOULLI	Kodak24	kodim09	160	0.946236	32.4024
BERNOULLI	Kodak24	kodim09	170	0.940567	32.0087
BERNOULLI	Kodak24	kodim09	180	0.933654	31.5068
BERNOULLI	Kodak24	kodim09	190	0.924678	30.9261
BERNOULLI	Kodak24	kodim09	200	0.914065	30.3358
BERNOULLI	Kodak24	kodim09	210	0.89935	29.5091
BERNOULLI	Kodak24	kodim09	220	0.881883	28.7454
BERNOULLI	Kodak24	kodim09	230	0.856694	27.6612
BERNOULLI	Kodak24	kodim09	240	0.814083	26.2739
BERNOULLI	Kodak24	kodim01	150	0.882568	27.7541
BERNOULLI	Kodak24	kodim01	160	0.866481	27.3338
BERNOULLI	Kodak24	kodim01	170	0.848206	26.8024
BERNOULLI	Kodak24	kodim01	180	0.827023	26.285
BERNOULLI	Kodak24	kodim01	190	0.803336	25.845
BERNOULLI	Kodak24	kodim01	200	0.774837	25.237
BERNOULLI	Kodak24	kodim01	210	0.740732	24.6511
BERNOULLI	Kodak24	kodim01	220	0.695244	23.893
BERNOULLI	Kodak24	kodim01	230	0.635992	23.0882
BERNOULLI	Kodak24	kodim01	240	0.548837	21.831
BERNOULLI	Kodak24	kodim04	150	0.932064	32.3173
BERNOULLI	Kodak24	kodim04	160	0.923554	31.9665
BERNOULLI	Kodak24	kodim04	170	0.912819	31.6551
BERNOULLI	Kodak24	kodim04	180	0.90167	31.3286
BERNOULLI	Kodak24	kodim04	190	0.889054	30.8741
BERNOULLI	Kodak24	kodim04	200	0.872422	30.3342
BERNOULLI	Kodak24	kodim04	210	0.852527	29.9246
BERNOULLI	Kodak24	kodim04	220	0.82809	29.29
BERNOULLI	Kodak24	kodim04	230	0.796713	28.4134
BERNOULLI	Kodak24	kodim04	240	0.752923	27.3935
BERNOULLI	Kodak24	kodim23	150	0.96785	33.2389
BERNOULLI	Kodak24	kodim23	160	0.964124	32.8826
BERNOULLI	Kodak24	kodim23	170	0.960343	32.6164
BERNOULLI	Kodak24	kodim23	180	0.955791	32.2561
BERNOULLI	Kodak24	kodim23	190	0.949707	31.797
BERNOULLI	Kodak24	kodim23	200	0.943137	31.4134
BERNOULLI	Kodak24	kodim23	210	0.933799	30.8731
BERNOULLI	Kodak24	kodim23	220	0.92329	30.1951
BERNOULLI	Kodak24	kodim23	230	0.903225	28.9938
BERNOULLI	Kodak24	kodim23	240	0.875824	27.7298
BERNOULLI	Kodak24	kodim22	150	0.914168	31.0365
BERNOULLI	Kodak24	kodim22	160	0.900651	30.4605
BERNOULLI	Kodak24	kodim22	170	0.888978	30.0951
BERNOULLI	Kodak24	kodim22	180	0.872401	29.5558
BERNOULLI	Kodak24	kodim22	190	0.854179	29.0658
BERNOULLI	Kodak24	kodim22	200	0.832463	28.5464
BERNOULLI	Kodak24	kodim22	210	0.80519	27.942
BERNOULLI	Kodak24	kodim22	220	0.770783	27.2655
BERNOULLI	Kodak24	kodim22	230	0.729901	26.4459
BERNOULLI	Kodak24	kodim22	240	0.667176	25.3847
BERNOULLI	Kodak24	kodim05	150	0.935204	28.3146
BERNOULLI	Kodak24	kodim05	160	0.921951	27.5158
BERNOULLI	Kodak24	kodim05	170	0.907464	26.87
BERNOULLI	Kodak24	kodim05	180	0.889118	26.2238
BERNOULLI	Kodak24	kodim05	190	0.867642	25.5361
BERNOULLI	Kodak24	kodim05	200	0.839498	24.8039
BERNOULLI	Kodak24	kodim05	210	0.80346	23.8913
BERNOULLI	Kodak24	kodim05	220	0.757691	22.9107
BERNOULLI	Kodak24	kodim05	230	0.691729	21.8576
BERNOULLI	Kodak24	kodim05	240	0.58991	20.4184
BERNOULLI	Kodak24	kodim13	150	0.829788	24.3626
BERNOULLI	Kodak24	kodim13	160	0.807791	23.9004
BERNOULLI	Kodak24	kodim13	170	0.780685	23.3862
BERNOULLI	Kodak24	kodim13	180	0.750099	22.8786
BERNOULLI	Kodak24	kodim13	190	0.718336	22.3872
BERNOULLI	Kodak24	kodim13	200	0.677303	21.8406
BERNOULLI	Kodak24	kodim13	210	0.634838	21.3379
BERNOULLI	Kodak24	kodim13	220	0.577293	20.6819
BERNOULLI	Kodak24	kodim13	230	0.51042	20.0774
BERNOULLI	Kodak24	kodim13	240	0.425843	19.3018
BERNOULLI	Kodak24	kodim18	150	0.905068	28.7994
BERNOULLI	Kodak24	kodim18	160	0.893539	28.2883
BERNOULLI	Kodak24	kodim18	170	0.875791	27.664
BERNOULLI	Kodak24	kodim18	180	0.85912	27.1683
BERNOULLI	Kodak24	kodim18	190	0.835333	26.5275
BERNOULLI	Kodak24	kodim18	200	0.810998	25.9614
BERNOULLI	Kodak24	kodim18	210	0.776591	25.204
BERNOULLI	Kodak24	kodim18	220	0.737688	24.6184
BERNOULLI	Kodak24	kodim18	230	0.68036	23.6984
BERNOULLI	Kodak24	kodim18	240	0.604739	22.6971
BERNOULLI	Kodak24	kodim10	150	0.955895	32.6295
BERNOULLI	Kodak24	kodim10	160	0.950339	32.2652
BERNOULLI	Kodak24	kodim10	170	0.943876	31.6944
BERNOULLI	Kodak24	kodim10	180	0.935531	31.3028
BERNOULLI	Kodak24	kodim10	190	0.926212	30.6824
BERNOULLI	Kodak24	kodim10	200	0.914919	30.0794
BERNOULLI	Kodak24	kodim10	210	0.898181	29.3325
BERNOULLI	Kodak24	kodim10	220	0.876246	28.3103
BERNOULLI	Kodak24	kodim10	230	0.842856	27.2941
BERNOULLI	Kodak24	kodim10	240	0.795178	26.155
BERNOULLI	Kodak24	kodim08	150	0.917561	26.9219
BERNOULLI	Kodak24	kodim08	160	0.905026	26.2388
BERNOULLI	Kodak24	kodim08	170	0.892971	25.7069
BERNOULLI	Kodak24	kodim08	180	0.874662	25.0823
BERNOULLI	Kodak24	kodim08	190	0.855201	24.3179
BERNOULLI	Kodak24	kodim08	200	0.830293	23.639
BERNOULLI	Kodak24	kodim08	210	0.797286	22.6528
BERNOULLI	Kodak24	kodim08	220	0.752686	21.6838
BERNOULLI	Kodak24	kodim08	230	0.689458	20.5304
BERNOULLI	Kodak24	kodim08	240	0.585468	18.8763
BERNOULLI	Kodak24	kodim19	150	0.921456	32.4023
BERNOULLI	Kodak24	kodim19	160	0.911332	31.765
BERNOULLI	Kodak24	kodim19	170	0.899461	31.0111
BERNOULLI	Kodak24	kodim19	180	0.887811	30.4601
BERNOULLI	Kodak24	kodim19	190	0.872471	29.8117
BERNOULLI	Kodak24	kodim19	200	0.852178	28.7709
BERNOULLI	Kodak24	kodim19	210	0.828805	28.0011
BERNOULLI	Kodak24	kodim19	220	0.800906	26.9324
BERNOULLI	Kodak24	kodim19	230	0.767408	25.7797
BERNOULLI	Kodak24	kodim19	240	0.705726	24.0639
BERNOULLI	Kodak24	kodim16	150	0.93281	30.755
BERNOULLI	Kodak24	kodim16	160	0.922479	30.2882
BERNOULLI	Kodak24	kodim16	170	0.911964	30.1291
BERNOULLI	Kodak24	kodim16	180	0.899378	29.7399
BERNOULLI	Kodak24	kodim16	190	0.883634	29.485
BERNOULLI	Kodak24	kodim16	200	0.865944	29.1545
BERNOULLI	Kodak24	kodim16	210	0.841477	28.7438
BERNOULLI	Kodak24	kodim16	220	0.811182	28.1119
BERNOULLI	Kodak24	kodim16	230	0.769002	27.5547
BERNOULLI	Kodak24	kodim16	240	0.713629	26.8357
BERNOULLI	Kodak24	kodim21	150	0.925629	29.1439
BERNOULLI	Kodak24	kodim21	160	0.916263	28.7979
BERNOULLI	Kodak24	kodim21	170	0.90406	28.1803
BERNOULLI	Kodak24	kodim21	180	0.893131	27.7411
BERNOULLI	Kodak24	kodim21	190	0.875939	27.0091
BERNOULLI	Kodak24	kodim21	200	0.857745	26.4059
BERNOULLI	Kodak24	kodim21	210	0.835895	25.8313
BERNOULLI	Kodak24	kodim21	220	0.808151	25.167
BERNOULLI	Kodak24	kodim21	230	0.769867	24.2755
BERNOULLI	Kodak24	kodim21	240	0.713719	23.1367
BERNOULLI	BSD68	16	150	0.933581	30.577
BERNOULLI	BSD68	16	160	0.92342	30.0446
BERNOULLI	BSD68	16	170	0.912544	29.2518
BERNOULLI	BSD68	16	180	0.900447	28.5217
BERNOULLI	BSD68	16	190	0.883571	27.9822
BERNOULLI	BSD68	16	200	0.865666	27.3128
BERNOULLI	BSD68	16	210	0.844588	26.7531
BERNOULLI	BSD68	16	220	0.806197	25.4032
BERNOULLI	BSD68	16	230	0.767213	24.5734
BERNOULLI	BSD68	16	240	0.69638	23.12
BERNOULLI	BSD68	62	150	0.904075	30.8509
BERNOULLI	BSD68	62	160	0.895557	30.5067
BERNOULLI	BSD68	62	170	0.88041	30.1047
BERNOULLI	BSD68	62	180	0.864843	29.3874
BERNOULLI	BSD68	62	190	0.849161	28.9252
BERNOULLI	BSD68	62	200	0.831748	28.3263
BERNOULLI	BSD68	62	210	0.804491	27.2745
BERNOULLI	BSD68	62	220	0.781214	26.9078
BERNOULLI	BSD68	62	230	0.748672	26.1327
BERNOULLI	BSD68	62	240	0.703709	25.0783
BERNOULLI	BSD68	46	150	0.908821	27.8133
BERNOULLI	BSD68	46	160	0.893807	27.2603
BERNOULLI	BSD68	46	170	0.877863	26.5679
BERNOULLI	BSD68	46	180	0.856032	25.8781
BERNOULLI	BSD68	46	190	0.832635	25.2617
BERNOULLI	BSD68	46	200	0.804457	24.556
BERNOULLI	BSD68	46	210	0.764789	23.8823
BERNOULLI	BSD68	46	220	0.719153	23.1468
BERNOULLI	BSD68	46	230	0.657512	22.3792
BERNOULLI	BSD68	46	240	0.571966	21.4803
BERNOULLI	BSD68	33	150	0.812056	21.6144
BERNOULLI	BSD68	33	160	0.7874	21.1274
BERNOULLI	BSD68	33	170	0.764253	20.6892
BERNOULLI	BSD68	33	180	0.730607	20.1521
BERNOULLI	BSD68	33	190	0.70118	19.7377
BERNOULLI	BSD68	33	200	0.658574	19.2048
BERNOULLI	BSD68	33	210	0.614406	18.6649
BERNOULLI	BSD68	33	220	0.56226	18.1021
BERNOULLI	BSD68	33	230	0.504492	17.5561
BERNOULLI	BSD68	33	240	0.42851	16.7638
BERNOULLI	BSD68	9	150	0.942617	31.6116
BERNOULLI	BSD68	9	160	0.932602	30.8364
BERNOULLI	BSD68	9	170	0.920919	30.1353
BERNOULLI	BSD68	9	180	0.912517	29.4583
BERNOULLI	BSD68	9	190	0.896999	28.6974
BERNOULLI	BSD68	9	200	0.881533	28.1393
BERNOULLI	BSD68	9	210	0.859086	27.325
BERNOULLI	BSD68	9	220	0.834278	26.4949
BERNOULLI	BSD68	9	230	0.802068	25.5949
BERNOULLI	BSD68	9	240	0.752626	24.0705
BERNOULLI	BSD68	49	150	0.890228	27.5836
BERNOULLI	BSD68	49	160	0.875389	27.1252
BERNOULLI	BSD68	49	170	0.853991	26.4214
BERNOULLI	BSD68	49	180	0.833706	25.8676
BERNOULLI	BSD68	49	190	0.806815	25.2866
BERNOULLI	BSD68	49	200	0.774074	24.6463
BERNOULLI	BSD68	49	210	0.735673	24.0024
BERNOULLI	BSD68	49	220	0.678174	23.2274
BERNOULLI	BSD68	49	230	0.612279	22.4128
BERNOULLI	BSD68	49	240	0.518371	21.5006
BERNOULLI	BSD68	17	150	0.937446	32.2936
BERNOULLI	BSD68	17	160	0.926962	31.6241
BERNOULLI	BSD68	17	170	0.913754	30.7787
BERNOULLI	BSD68	17	180	0.901986	30.235
BERNOULLI	BSD68	17	190	0.884463	29.4798
BERNOULLI	BSD68	17	200	0.86622	28.9348
BERNOULLI	BSD68	17	210	0.844275	28.228
BERNOULLI	BSD68	17	220	0.812336	27.3214
BERNOULLI	BSD68	17	230	0.774029	26.5185
BERNOULLI	BSD68	17	240	0.713926	25.3687
BERNOULLI	BSD68	15	150	0.872435	25.4182
BERNOULLI	BSD68	15	160	0.849225	24.8291
BERNOULLI	BSD68	15	170	0.831102	24.336
BERNOULLI	BSD68	15	180	0.804556	23.7173
BERNOULLI	BSD68	15	190	0.769277	23.0558
BERNOULLI	BSD68	15	200	0.731677	22.5002
BERNOULLI	BSD68	15	210	0.68226	21.8381
BERNOULLI	BSD68	15	220	0.629034	21.2487
BERNOULLI	BSD68	15	230	0.553315	20.6573
BERNOULLI	BSD68	15	240	0.46239	19.7769
BERNOULLI	BSD68	52	150	0.909359	27.8919
BERNOULLI	BSD68	52	160	0.895999	27.3713
BERNOULLI	BSD68	52	170	0.88178	26.5991
BERNOULLI	BSD68	52	180	0.864515	25.6776
BERNOULLI	BSD68	52	190	0.844711	25.0187
BERNOULLI	BSD68	52	200	0.821134	24.1662
BERNOULLI	BSD68	52	210	0.788579	23.1332
BERNOULLI	BSD68	52	220	0.747648	21.9461
BERNOULLI	BSD68	52	230	0.692103	20.6257
BERNOULLI	BSD68	52	240	0.616734	19.3716
BERNOULLI	BSD68	25	150	0.902224	27.3924
BERNOULLI	BSD68	25	160	0.892532	26.9546
BERNOULLI	BSD68	25	170	0.880327	26.4459
BERNOULLI	BSD68	25	180	0.868631	26.0454
BERNOULLI	BSD68	25	190	0.849121	25.3246
BERNOULLI	BSD68	25	200	0.831741	24.7164
BERNOULLI	BSD68	25	210	0.811601	24.1989
BERNOULLI	BSD68	25	220	0.783871	23.3425
BERNOULLI	BSD68	25	230	0.753541	22.7118
BERNOULLI	BSD68	25	240	0.717631	21.7855
BERNOULLI	BSD68	22	150	0.937751	29.2559
BERNOULLI	BSD68	22	160	0.928191	28.4938
BERNOULLI	BSD68	22	170	0.915637	27.6599
BERNOULLI	BSD68	22	180	0.898334	26.6326
BERNOULLI	BSD68	22	190	0.879955	25.6899
BERNOULLI	BSD68	22	200	0.858456	24.909
BERNOULLI	BSD68	22	210	0.819813	23.6681
BERNOULLI	BSD68	22	220	0.771564	22.4443
BERNOULLI	BSD68	22	230	0.710055	21.2016
BERNOULLI	BSD68	22	240	0.603228	19.5568
BERNOULLI	BSD68	61	150	0.911465	33.5565
BERNOULLI	BSD68	61	160	0.899958	32.9536
BERNOULLI	BSD68	61	170	0.89074	32.5593
BERNOULLI	BSD68	61	180	0.876308	31.9343
BERNOULLI	BSD68	61	190	0.860664	31.4474
BERNOULLI	BSD68	61	200	0.845507	30.9819
BERNOULLI	BSD68	61	210	0.828396	30.5249
BERNOULLI	BSD68	61	220	0.805375	29.7934
BERNOULLI	BSD68	61	230	0.779922	29.1768
BERNOULLI	BSD68	61	240	0.742441	28.2416
BERNOULLI	BSD68	51	150	0.87488	27.531
BERNOULLI	BSD68	51	160	0.861239	27.0439
BERNOULLI	BSD68	51	170	0.84101	26.5851
BERNOULLI	BSD68	51	180	0.819701	26.0139
BERNOULLI	BSD68	51	190	0.795204	25.4069
BERNOULLI	BSD68	51	200	0.765677	24.8188
BERNOULLI	BSD68	51	210	0.735411	24.3373
BERNOULLI	BSD68	51	220	0.688175	23.5651
BERNOULLI	BSD68	51	230	0.633142	22.9296
BERNOULLI	BSD68	51	240	0.564659	22.0311
BERNOULLI	BSD68	35	150	0.827131	23.6097
BERNOULLI	BSD68	35	160	0.796456	22.94
BERNOULLI	BSD68	35	170	0.767497	22.409
BERNOULLI	BSD68	35	180	0.736255	21.8761
BERNOULLI	BSD68	35	190	0.69693	21.3091
BERNOULLI	BSD68	35	200	0.646702	20.7478
BERNOULLI	BSD68	35	210	0.58776	20.1533
BERNOULLI	BSD68	35	220	0.524465	19.5745
BERNOULLI	BSD68	35	230	0.435496	18.9408
BERNOULLI	BSD68	35	240	0.330327	18.2404
BERNOULLI	BSD68	8	150	0.825065	25.7347
BERNOULLI	BSD68	8	160	0.806117	25.2418
BERNOULLI	BSD68	8	170	0.781122	24.7854
BERNOULLI	BSD68	8	180	0.755758	24.2706
BERNOULLI	BSD68	8	190	0.725208	23.772
BERNOULLI	BSD68	8	200	0.694895	23.2758
BERNOULLI	BSD68	8	210	0.656542	22.7167
BERNOULLI	BSD68	8	220	0.609251	22.169
BERNOULLI	BSD68	8	230	0.54999	21.5214
BERNOULLI	BSD68	8	240	0.47669	20.648
BERNOULLI	BSD68	38	150	0.951506	37.7865
BERNOULLI	BSD68	38	160	0.947189	37.2474
BERNOULLI	BSD68	38	170	0.939775	36.5317
BERNOULLI	BSD68	38	180	0.933731	35.9287
BERNOULLI	BSD68	38	190	0.926704	35.2976
BERNOULLI	BSD68	38	200	0.917497	34.7856
BERNOULLI	BSD68	38	210	0.906396	33.6597
BERNOULLI	BSD68	38	220	0.893395	32.8179
BERNOULLI	BSD68	38	230	0.870858	31.3925
BERNOULLI	BSD68	38	240	0.837179	29.064
BERNOULLI	BSD68	10	150	0.931239	29.7738
BERNOULLI	BSD68	10	160	0.921414	28.9269
BERNOULLI	BSD68	10	170	0.912912	28.5871
BERNOULLI	BSD68	10	180	0.902589	27.9782
BERNOULLI	BSD68	10	190	0.890265	27.284
BERNOULLI	BSD68	10	200	0.873743	26.6851
BERNOULLI	BSD68	10	210	0.854364	25.6707
BERNOULLI	BSD68	10	220	0.834689	25.0958
BERNOULLI	BSD68	10	230	0.797711	23.9648
BERNOULLI	BSD68	10	240	0.748445	22.5122
BERNOULLI	BSD68	32	150	0.939392	34.137
BERNOULLI	BSD68	32	160	0.933239	33.5845
BERNOULLI	BSD68	32	170	0.92373	32.842
BERNOULLI	BSD68	32	180	0.914012	32.0442
BERNOULLI	BSD68	32	190	0.906891	31.6469
BERNOULLI	BSD68	32	200	0.892425	30.6507
BERNOULLI	BSD68	32	210	0.879852	30.0991
BERNOULLI	BSD68	32	220	0.865443	28.8469
BERNOULLI	BSD68	32	230	0.846217	27.8754
BERNOULLI	BSD68	32	240	0.825002	26.805
BERNOULLI	BSD68	23	150	0.966873	36.3473
BERNOULLI	BSD68	23	160	0.961328	35.4848
BERNOULLI	BSD68	23	170	0.957227	35.0372
BERNOULLI	BSD68	23	180	0.95173	34.4506
BERNOULLI	BSD68	23	190	0.942378	33.6138
BERNOULLI	BSD68	23	200	0.934754	33.0314
BERNOULLI	BSD68	23	210	0.924015	32.3651
BERNOULLI	BSD68	23	220	0.905772	31.478
BERNOULLI	BSD68	23	230	0.88766	30.3998
BERNOULLI	BSD68	23	240	0.850925	28.4979
BERNOULLI	BSD68	29	150	0.948987	30.64
BERNOULLI	BSD68	29	160	0.941349	29.9872
BERNOULLI	BSD68	29	170	0.930603	29.253
BERNOULLI	BSD68	29	180	0.919783	28.7358
BERNOULLI	BSD68	29	190	0.905927	27.8614
BERNOULLI	BSD68	29	200	0.885908	26.9032
BERNOULLI	BSD68	29	210	0.86296	26.083
BERNOULLI	BSD68	29	220	0.826192	24.9484
BERNOULLI	BSD68	29	230	0.776894	23.7157
BERNOULLI	BSD68	29	240	0.702753	22.0456
BERNOULLI	BSD68	63	150	0.978324	37.6021
BERNOULLI	BSD68	63	160	0.97517	36.9245
BERNOULLI	BSD68	63	170	0.972871	36.1404
BERNOULLI	BSD68	63	180	0.968828	34.9685
BERNOULLI	BSD68	63	190	0.963781	33.953
BERNOULLI	BSD68	63	200	0.959737	32.7766
BERNOULLI	BSD68	63	210	0.951536	31.384
BERNOULLI	BSD68	63	220	0.940008	29.6768
BERNOULLI	BSD68	63	230	0.925844	27.829
BERNOULLI	BSD68	63	240	0.886871	24.3275
BERNOULLI	BSD68	57	150	0.770187	22.7487
BERNOULLI	BSD68	57	160	0.742373	22.3358
BERNOULLI	BSD68	57	170	0.70844	21.835
BERNOULLI	BSD68	57	180	0.674411	21.4553
BERNOULLI	BSD68	57	190	0.633381	20.9878
BERNOULLI	BSD68	57	200	0.591113	20.5248
BERNOULLI	BSD68	57	210	0.537504	20.093
BERNOULLI	BSD68	57	220	0.475918	19.5749
BERNOULLI	BSD68	57	230	0.409003	19.0213
BERNOULLI	BSD68	57	240	0.326229	18.3895
BERNOULLI	BSD68	19	150	0.952448	33.6098
BERNOULLI	BSD68	19	160	0.946095	33.1856
BERNOULLI	BSD68	19	170	0.935682	32.3643
BERNOULLI	BSD68	19	180	0.922786	31.5994
BERNOULLI	BSD68	19	190	0.908226	30.907
BERNOULLI	BSD68	19	200	0.890249	30.1173
BERNOULLI	BSD68	19	210	0.866685	29.3264
BERNOULLI	BSD68	19	220	0.83227	28.2371
BERNOULLI	BSD68	19	230	0.779928	27.113
BERNOULLI	BSD68	19	240	0.708374	25.7915
BERNOULLI	BSD68	58	150	0.887278	29.2655
BERNOULLI	BSD68	58	160	0.872927	28.7853
BERNOULLI	BSD68	58	170	0.857702	28.2268
BERNOULLI	BSD68	58	180	0.840165	27.8474
BERNOULLI	BSD68	58	190	0.820838	27.3224
BERNOULLI	BSD68	58	200	0.796963	26.7925
BERNOULLI	BSD68	58	210	0.769265	26.2943
BERNOULLI	BSD68	58	220	0.737216	25.7334
BERNOULLI	BSD68	58	230	0.696972	25.0625
BERNOULLI	BSD68	58	240	0.646228	24.1801
BERNOULLI	BSD68	66	150	0.924221	30.7989
BERNOULLI	BSD68	66	160	0.913275	30.2184
BERNOULLI	BSD68	66	170	0.899416	29.5206
BERNOULLI	BSD68	66	180	0.883996	28.9225
BERNOULLI	BSD68	66	190	0.867463	28.2106
BERNOULLI	BSD68	66	200	0.845832	27.6776
BERNOULLI	BSD68	66	210	0.824099	26.9337
BERNOULLI	BSD68	66	220	0.789881	26.0459
BERNOULLI	BSD68	66	230	0.750723	25.0793
BERNOULLI	BSD68	66	240	0.694526	23.9191
BERNOULLI	BSD68	56	150	0.898661	28.2906
BERNOULLI	BSD68	56	160	0.882071	27.7663
BERNOULLI	BSD68	56	170	0.862102	26.8017
BERNOULLI	BSD68	56	180	0.844189	26.4602
BERNOULLI	BSD68	56	190	0.818124	25.6144
BERNOULLI	BSD68	56	200	0.789655	24.9287
BERNOULLI	BSD68	56	210	0.748761	23.9956
BERNOULLI	BSD68	56	220	0.708854	23.3303
BERNOULLI	BSD68	56	230	0.650095	22.2682
BERNOULLI	BSD68	56	240	0.55825	20.6907
BERNOULLI	BSD68	44	150	0.919125	29.9797
BERNOULLI	BSD68	44	160	0.908203	29.4241
BERNOULLI	BSD68	44	170	0.894851	28.7956
BERNOULLI	BSD68	44	180	0.880603	28.1861
BERNOULLI	BSD68	44	190	0.863375	27.3292
BERNOULLI	BSD68	44	200	0.840422	26.4913
BERNOULLI	BSD68	44	210	0.809993	25.5314
BERNOULLI	BSD68	44	220	0.778561	24.7784
BERNOULLI	BSD68	44	230	0.739756	23.982
BERNOULLI	BSD68	44	240	0.680605	22.6601
BERNOULLI	BSD68	18	150	0.937668	29.5108
BERNOULLI	BSD68	18	160	0.930664	29.0921
BERNOULLI	BSD68	18	170	0.918917	28.3997
BERNOULLI	BSD68	18	180	0.906111	27.53
BERNOULLI	BSD68	18	190	0.891084	26.8894
BERNOULLI	BSD68	18	200	0.870066	25.9043
BERNOULLI	BSD68	18	210	0.844382	24.9797
BERNOULLI	BSD68	18	220	0.808453	23.9024
BERNOULLI	BSD68	18	230	0.758003	22.9757
BERNOULLI	BSD68	18	240	0.655102	20.7601
BERNOULLI	BSD68	7	150	0.877099	23.9305
BERNOULLI	BSD68	7	160	0.860963	23.3901
BERNOULLI	BSD68	7	170	0.837831	22.7538
BERNOULLI	BSD68	7	180	0.813498	22.1594
BERNOULLI	BSD68	7	190	0.785087	21.5253
BERNOULLI	BSD68	7	200	0.752203	20.8921
BERNOULLI	BSD68	7	210	0.706378	20.1076
BERNOULLI	BSD68	7	220	0.651377	19.3514
BERNOULLI	BSD68	7	230	0.572947	18.4304
BERNOULLI	BSD68	7	240	0.473788	17.2981
BERNOULLI	BSD68	6	150	0.966139	30.888
BERNOULLI	BSD68	6	160	0.961789	30.3435
BERNOULLI	BSD68	6	170	0.954963	29.4907
BERNOULLI	BSD68	6	180	0.945821	28.4887
BERNOULLI	BSD68	6	190	0.936128	27.808
BERNOULLI	BSD68	6	200	0.920514	26.6776
BERNOULLI	BSD68	6	210	0.907364	25.9196
BERNOULLI	BSD68	6	220	0.875978	24.429
BERNOULLI	BSD68	6	230	0.842114	23.1056
BERNOULLI	BSD68	6	240	0.762579	20.7644
BERNOULLI	BSD68	26	150	0.897069	24.9118
BERNOULLI	BSD68	26	160	0.881401	24.2296
BERNOULLI	BSD68	26	170	0.862622	23.5572
BERNOULLI	BSD68	26	180	0.8461	23.0993
BERNOULLI	BSD68	26	190	0.81384	22.2687
BERNOULLI	BSD68	26	200	0.785632	21.5938
BERNOULLI	BSD68	26	210	0.750213	20.9787
BERNOULLI	BSD68	26	220	0.695434	20.0395
BERNOULLI	BSD68	26	230	0.625601	19.0653
BERNOULLI	BSD68	26	240	0.535629	18.0382
BERNOULLI	BSD68	1	150	0.924711	31.4587
BERNOULLI	BSD68	1	160	0.912146	30.8012
BERNOULLI	BSD68	1	170	0.897595	29.9552
BERNOULLI	BSD68	1	180	0.878462	29.2198
BERNOULLI	BSD68	1	190	0.857736	28.4757
BERNOULLI	BSD68	1	200	0.831218	27.709
BERNOULLI	BSD68	1	210	0.79564	26.6243
BERNOULLI	BSD68	1	220	0.748442	25.6405
BERNOULLI	BSD68	1	230	0.676467	24.3845
BERNOULLI	BSD68	1	240	0.569436	22.9305
BERNOULLI	BSD68	21	150	0.889244	27.3686
BERNOULLI	BSD68	21	160	0.872299	26.8015
BERNOULLI	BSD68	21	170	0.85422	26.3081
BERNOULLI	BSD68	21	180	0.831373	25.6957
BERNOULLI	BSD68	21	190	0.807335	25.1577
BERNOULLI	BSD68	21	200	0.775252	24.5311
BERNOULLI	BSD68	21	210	0.737498	23.9447
BERNOULLI	BSD68	21	220	0.698001	23.2188
BERNOULLI	BSD68	21	230	0.641583	22.5065
BERNOULLI	BSD68	21	240	0.569836	21.5537
BERNOULLI	BSD68	53	150	0.932462	34.7735
BERNOULLI	BSD68	53	160	0.92339	34.2958
BERNOULLI	BSD68	53	170	0.915059	33.7449
BERNOULLI	BSD68	53	180	0.905271	33.369
BERNOULLI	BSD68	53	190	0.894394	32.8098
BERNOULLI	BSD68	53	200	0.879127	32.0826
BERNOULLI	BSD68	53	210	0.866827	31.778
BERNOULLI	BSD68	53	220	0.844658	30.894
BERNOULLI	BSD68	53	230	0.81965	30.0764
BERNOULLI	BSD68	53	240	0.786219	28.6868
BERNOULLI	BSD68	30	150	0.952599	30.2469
BERNOULLI	BSD68	30	160	0.945914	29.5426
BERNOULLI	BSD68	30	170	0.937495	28.8664
BERNOULLI	BSD68	30	180	0.927608	28.2646
BERNOULLI	BSD68	30	190	0.917105	27.5268
BERNOULLI	BSD68	30	200	0.902595	26.8458
BERNOULLI	BSD68	30	210	0.883328	25.9393
BERNOULLI	BSD68	30	220	0.86502	25.184
BERNOULLI	BSD68	30	230	0.825277	23.8649
BERNOULLI	BSD68	30	240	0.778115	22.6856
BERNOULLI	BSD68	3	150	0.915294	30.7093
BERNOULLI	BSD68	3	160	0.904043	30.2215
BERNOULLI	BSD68	3	170	0.893285	29.7855
BERNOULLI	BSD68	3	180	0.875157	28.9692
BERNOULLI	BSD68	3	190	0.857384	28.2951
BERNOULLI	BSD68	3	200	0.835357	27.6618
BERNOULLI	BSD68	3	210	0.807459	26.9129
BERNOULLI	BSD68	3	220	0.772574	26.0071
BERNOULLI	BSD68	3	230	0.727686	24.9904
BERNOULLI	BSD68	3	240	0.651108	23.6568
BERNOULLI	BSD68	36	150	0.911585	28.3473
BERNOULLI	BSD68	36	160	0.897164	27.6846
BERNOULLI	BSD68	36	170	0.879333	27.0172
BERNOULLI	BSD68	36	180	0.861164	26.4031
BERNOULLI	BSD68	36	190	0.834008	25.6781
BERNOULLI	BSD68	36	200	0.802832	24.904
BERNOULLI	BSD68	36	210	0.766956	24.1272
BERNOULLI	BSD68	36	220	0.710732	23.2301
BERNOULLI	BSD68	36	230	0.642995	22.341
BERNOULLI	BSD68	36	240	0.519523	20.8987
BERNOULLI	BSD68	20	150	0.935777	32.4721
BERNOULLI	BSD68	20	160	0.926373	31.8622
BERNOULLI	BSD68	20	170	0.915988	31.2255
BERNOULLI	BSD68	20	180	0.903301	30.4896
BERNOULLI	BSD68	20	190	0.890531	29.7437
BERNOULLI	BSD68	20	200	0.875537	29.2883
BERNOULLI	BSD68	20	210	0.855588	28.375
BERNOULLI	BSD68	20	220	0.832789	27.4544
BERNOULLI	BSD68	20	230	0.795737	26.3591
BERNOULLI	BSD68	20	240	0.750627	25.2602
BERNOULLI	BSD68	34	150	0.949901	33.2414
BERNOULLI	BSD68	34	160	0.942401	32.8407
BERNOULLI	BSD68	34	170	0.932424	31.9472
BERNOULLI	BSD68	34	180	0.919838	31.2773
BERNOULLI	BSD68	34	190	0.906851	30.6407
BERNOULLI	BSD68	34	200	0.888921	29.7826
BERNOULLI	BSD68	34	210	0.865165	28.7365
BERNOULLI	BSD68	34	220	0.832222	27.8867
BERNOULLI	BSD68	34	230	0.784512	26.8045
BERNOULLI	BSD68	34	240	0.71653	25.6408
BERNOULLI	BSD68	28	150	0.943805	28.9736
BERNOULLI	BSD68	28	160	0.935849	28.3735
BERNOULLI	BSD68	28	170	0.924952	27.6694
BERNOULLI	BSD68	28	180	0.913813	27.1934
BERNOULLI	BSD68	28	190	0.898198	26.5573
BERNOULLI	BSD68	28	200	0.879641	25.8765
BERNOULLI	BSD68	28	210	0.854703	25.1963
BERNOULLI	BSD68	28	220	0.824698	24.4325
BERNOULLI	BSD68	28	230	0.772623	23.4126
BERNOULLI	BSD68	28	240	0.70011	22.2256
BERNOULLI	BSD68	5	150	0.901567	30.0773
BERNOULLI	BSD68	5	160	0.888118	29.3723
BERNOULLI	BSD68	5	170	0.876168	28.904
BERNOULLI	BSD68	5	180	0.860049	27.922
BERNOULLI	BSD68	5	190	0.842145	27.6781
BERNOULLI	BSD68	5	200	0.821263	26.684
BERNOULLI	BSD68	5	210	0.798488	25.9592
BERNOULLI	BSD68	5	220	0.762819	24.8047
BERNOULLI	BSD68	5	230	0.725572	24.0534
BERNOULLI	BSD68	5	240	0.65667	22.6213
BERNOULLI	BSD68	43	150	0.894926	28.127
BERNOULLI	BSD68	43	160	0.881132	27.5708
BERNOULLI	BSD68	43	170	0.864369	27.0423
BERNOULLI	BSD68	43	180	0.845545	26.3466
BERNOULLI	BSD68	43	190	0.825384	25.7605
BERNOULLI	BSD68	43	200	0.804541	25.3872
BERNOULLI	BSD68	43	210	0.771442	24.5493
BERNOULLI	BSD68	43	220	0.73566	23.7361
BERNOULLI	BSD68	43	230	0.684306	22.6658
BERNOULLI	BSD68	43	240	0.620284	21.7861
BERNOULLI	BSD68	55	150	0.936848	31.632
BERNOULLI	BSD68	55	160	0.927567	31.1558
BERNOULLI	BSD68	55	170	0.91537	30.2587
BERNOULLI	BSD68	55	180	0.900877	29.4791
BERNOULLI	BSD68	55	190	0.883539	28.6684
BERNOULLI	BSD68	55	200	0.862548	27.8755
BERNOULLI	BSD68	55	210	0.837474	27.0146
BERNOULLI	BSD68	55	220	0.795976	25.7991
BERNOULLI	BSD68	55	230	0.751076	24.7855
BERNOULLI	BSD68	55	240	0.663973	22.9324
BERNOULLI	BSD68	67	150	0.866324	24.5258
BERNOULLI	BSD68	67	160	0.846779	23.9233
BERNOULLI	BSD68	67	170	0.824373	23.3582
BERNOULLI	BSD68	67	180	0.802171	22.9138
BERNOULLI	BSD68	67	190	0.776746	22.3234
BERNOULLI	BSD68	67	200	0.753101	21.9202
BERNOULLI	BSD68	67	210	0.715578	21.3587
BERNOULLI	BSD68	67	220	0.676978	20.8058
BERNOULLI	BSD68	67	230	0.626835	20.1595
BERNOULLI	BSD68	67	240	0.5588	19.1636
BERNOULLI	BSD68	41	150	0.9379	32.4719
BERNOULLI	BSD68	41	160	0.928741	31.8803
BERNOULLI	BSD68	41	170	0.915045	31.094
BERNOULLI	BSD68	41	180	0.899354	30.3425
BERNOULLI	BSD68	41	190	0.881115	29.6957
BERNOULLI	BSD68	41	200	0.855368	28.8726
BERNOULLI	BSD68	41	210	0.825997	28.0109
BERNOULLI	BSD68	41	220	0.782226	27.0297
BERNOULLI	BSD68	41	230	0.714776	25.6696
BERNOULLI	BSD68	41	240	0.63136	24.5618
BERNOULLI	BSD68	0	150	0.987891	41.6587
BERNOULLI	BSD68	0	160	0.987306	41.6692
BERNOULLI	BSD68	0	170	0.985711	40.5335
BERNOULLI	BSD68	0	180	0.983491	39.2861
BERNOULLI	BSD68	0	190	0.982491	39.2614
BERNOULLI	BSD68	0	200	0.979861	37.9905
BERNOULLI	BSD68	0	210	0.977338	37.1383
BERNOULLI	BSD68	0	220	0.973644	36.411
BERNOULLI	BSD68	0	230	0.967889	34.9256
BERNOULLI	BSD68	0	240	0.954708	32.7042
BERNOULLI	BSD68	13	150	0.964427	36.7908
BERNOULLI	BSD68	13	160	0.959054	36.1425
BERNOULLI	BSD68	13	170	0.953375	35.617
BERNOULLI	BSD68	13	180	0.948256	35.1505
BERNOULLI	BSD68	13	190	0.941401	34.4967
BERNOULLI	BSD68	13	200	0.931689	33.87
BERNOULLI	BSD68	13	210	0.923124	32.9412
BERNOULLI	BSD68	13	220	0.905061	32.1417
BERNOULLI	BSD68	13	230	0.884762	30.9328
BERNOULLI	BSD68	13	240	0.854643	28.9766
BERNOULLI	BSD68	48	150	0.867047	25.2991
BERNOULLI	BSD68	48	160	0.848146	24.552
BERNOULLI	BSD68	48	170	0.832748	24.1658
BERNOULLI	BSD68	48	180	0.800441	23.2738
BERNOULLI	BSD68	48	190	0.775038	22.9325
BERNOULLI	BSD68	48	200	0.741529	22.1906
BERNOULLI	BSD68	48	210	0.697244	21.4021
BERNOULLI	BSD68	48	220	0.645288	20.7473
BERNOULLI	BSD68	48	230	0.579424	19.8151
BERNOULLI	BSD68	48	240	0.480792	18.8218
BERNOULLI	BSD68	45	150	0.967973	31.8847
BERNOULLI	BSD68	45	160	0.963462	31.4994
BERNOULLI	BSD68	45	170	0.956476	30.3911
BERNOULLI	BSD68	45	180	0.949284	29.5845
BERNOULLI	BSD68	45	190	0.940206	28.9666
BERNOULLI	BSD68	45	200	0.927654	28.0626
BERNOULLI	BSD68	45	210	0.90929	26.5868
BERNOULLI	BSD68	45	220	0.89049	25.9907
BERNOULLI	BSD68	45	230	0.84991	24.3608
BERNOULLI	BSD68	45	240	0.790155	22.6131
BERNOULLI	BSD68	54	150	0.915475	34.7155
BERNOULLI	BSD68	54	160	0.905125	34.2017
BERNOULLI	BSD68	54	170	0.894148	33.7408
BERNOULLI	BSD68	54	180	0.88014	33.119
BERNOULLI	BSD68	54	190	0.865508	32.6781
BERNOULLI	BSD68	54	200	0.847335	32.1075
BERNOULLI	BSD68	54	210	0.825228	31.5231
BERNOULLI	BSD68	54	220	0.800063	30.7904
BERNOULLI	BSD68	54	230	0.763787	30.1097
BERNOULLI	BSD68	54	240	0.715308	29.2241
BERNOULLI	BSD68	60	150	0.902575	32.7284
BERNOULLI	BSD68	60	160	0.891297	32.3253
BERNOULLI	BSD68	60	170	0.876919	31.7413
BERNOULLI	BSD68	60	180	0.861343	31.2689
BERNOULLI	BSD68	60	190	0.846775	30.8127
BERNOULLI	BSD68	60	200	0.827065	30.2273
BERNOULLI	BSD68	60	210	0.808343	29.7874
BERNOULLI	BSD68	60	220	0.782283	28.9544
BERNOULLI	BSD68	60	230	0.750473	28.2775
BERNOULLI	BSD68	60	240	0.710879	27.245
BERNOULLI	BSD68	39	150	0.751701	29.0024
BERNOULLI	BSD68	39	160	0.726478	28.6776
BERNOULLI	BSD68	39	170	0.698413	28.3165
BERNOULLI	BSD68	39	180	0.672499	27.9797
BERNOULLI	BSD68	39	190	0.638593	27.6156
BERNOULLI	BSD68	39	200	0.607588	27.3273
BERNOULLI	BSD68	39	210	0.571305	27.0053
BERNOULLI	BSD68	39	220	0.527871	26.6678
BERNOULLI	BSD68	39	230	0.48495	26.2287
BERNOULLI	BSD68	39	240	0.4351	25.7397
BERNOULLI	BSD68	11	150	0.963466	34.6192
BERNOULLI	BSD68	11	160	0.956569	33.71
BERNOULLI	BSD68	11	170	0.949972	33.1244
BERNOULLI	BSD68	11	180	0.939148	32.3489
BERNOULLI	BSD68	11	190	0.931757	32.0251
BERNOULLI	BSD68	11	200	0.915085	30.9725
BERNOULLI	BSD68	11	210	0.897539	30.3002
BERNOULLI	BSD68	11	220	0.867527	29.1925
BERNOULLI	BSD68	11	230	0.833146	28.0784
BERNOULLI	BSD68	11	240	0.775511	26.6708
BERNOULLI	BSD68	4	150	0.903691	29.1892
BERNOULLI	BSD68	4	160	0.891243	28.6865
BERNOULLI	BSD68	4	170	0.876222	28.1223
BERNOULLI	BSD68	4	180	0.85454	27.223
BERNOULLI	BSD68	4	190	0.838035	26.8612
BERNOULLI	BSD68	4	200	0.813022	26.0613
BERNOULLI	BSD68	4	210	0.783352	25.2432
BERNOULLI	BSD68	4	220	0.749953	24.4076
BERNOULLI	BSD68	4	230	0.702355	23.4524
BERNOULLI	BSD68	4	240	0.639584	22.3255
BERNOULLI	BSD68	31	150	0.943668	33.4515
BERNOULLI	BSD68	31	160	0.935396	32.8401
BERNOULLI	BSD68	31	170	0.925491	32.1998
BERNOULLI	BSD68	31	180	0.912917	31.4815
BERNOULLI	BSD68	31	190	0.89954	30.8439
BERNOULLI	BSD68	31	200	0.881699	30.05
BERNOULLI	BSD68	31	210	0.859717	29.1976
BERNOULLI	BSD68	31	220	0.829975	28.2021
BERNOULLI	BSD68	31	230	0.78719	27.2053
BERNOULLI	BSD68	31	240	0.729513	25.8718
BERNOULLI	BSD68	27	150	0.899124	27.812
BERNOULLI	BSD68	27	160	0.883744	27.1661
BERNOULLI	BSD68	27	170	0.863343	26.3133
BERNOULLI	BSD68	27	180	0.843661	25.7535
BERNOULLI	BSD68	27	190	0.816377	24.9126
BERNOULLI	BSD68	27	200	0.78619	24.3248
BERNOULLI	BSD68	27	210	0.747078	23.5003
BERNOULLI	BSD68	27	220	0.701149	22.5042
BERNOULLI	BSD68	27	230	0.625473	21.395
BERNOULLI	BSD68	27	240	0.528923	20.0983
BERNOULLI	BSD68	59	150	0.909046	33.7898
BERNOULLI	BSD68	59	160	0.898055	33.3914
BERNOULLI	BSD68	59	170	0.886023	32.8703
BERNOULLI	BSD68	59	180	0.872374	32.4134
BERNOULLI	BSD68	59	190	0.858902	32.0464
BERNOULLI	BSD68	59	200	0.842887	31.5724
BERNOULLI	BSD68	59	210	0.8178	30.8988
BERNOULLI	BSD68	59	220	0.798907	30.4629
BERNOULLI	BSD68	59	230	0.769299	29.7695
BERNOULLI	BSD68	59	240	0.732689	29.0201
BERNOULLI	BSD68	37	150	0.91958	27.0968
BERNOULLI	BSD68	37	160	0.91006	26.514
BERNOULLI	BSD68	37	170	0.89926	26.0183
BERNOULLI	BSD68	37	180	0.886553	25.5527
BERNOULLI	BSD68	37	190	0.871268	25.0121
BERNOULLI	BSD68	37	200	0.855865	24.5899
BERNOULLI	BSD68	37	210	0.834297	23.9336
BERNOULLI	BSD68	37	220	0.803898	23.2752
BERNOULLI	BSD68	37	230	0.770801	22.4526
BERNOULLI	BSD68	37	240	0.709725	21.3849
BERNOULLI	BSD68	47	150	0.958941	38.2859
BERNOULLI	BSD68	47	160	0.953665	37.7836
BERNOULLI	BSD68	47	170	0.948271	37.3557
BERNOULLI	BSD68	47	180	0.93991	36.6371
BERNOULLI	BSD68	47	190	0.930979	36.0032
BERNOULLI	BSD68	47	200	0.918958	35.1714
BERNOULLI	BSD68	47	210	0.905488	34.4739
BERNOULLI	BSD68	47	220	0.88724	33.7266
BERNOULLI	BSD68	47	230	0.861155	32.5853
BERNOULLI	BSD68	47	240	0.827085	31.3676
BERNOULLI	BSD68	12	150	0.905061	28.4927
BERNOULLI	BSD68	12	160	0.8913	27.9323
BERNOULLI	BSD68	12	170	0.874788	27.3594
BERNOULLI	BSD68	12	180	0.857046	26.7823
BERNOULLI	BSD68	12	190	0.837762	26.3407
BERNOULLI	BSD68	12	200	0.809935	25.7255
BERNOULLI	BSD68	12	210	0.781607	25.1921
BERNOULLI	BSD68	12	220	0.739353	24.4157
BERNOULLI	BSD68	12	230	0.699334	23.7903
BERNOULLI	BSD68	12	240	0.624344	22.7047
BERNOULLI	BSD68	50	150	0.924768	33.9691
BERNOULLI	BSD68	50	160	0.916299	33.5875
BERNOULLI	BSD68	50	170	0.904998	32.9913
BERNOULLI	BSD68	50	180	0.895773	32.6017
BERNOULLI	BSD68	50	190	0.880413	31.9511
BERNOULLI	BSD68	50	200	0.86497	31.3789
BERNOULLI	BSD68	50	210	0.847048	30.6617
BERNOULLI	BSD68	50	220	0.827343	30.0411
BERNOULLI	BSD68	50	230	0.805459	29.2262
BERNOULLI	BSD68	50	240	0.765258	28.0093
BERNOULLI	BSD68	65	150	0.85269	28.0875
BERNOULLI	BSD68	65	160	0.834213	27.5979
BERNOULLI	BSD68	65	170	0.811461	26.9903
BERNOULLI	BSD68	65	180	0.785517	26.4667
BERNOULLI	BSD68	65	190	0.759645	25.9487
BERNOULLI	BSD68	65	200	0.727107	25.4076
BERNOULLI	BSD68	65	210	0.688631	24.7376
BERNOULLI	BSD68	65	220	0.642071	24.0649
BERNOULLI	BSD68	65	230	0.584283	23.2317
BERNOULLI	BSD68	65	240	0.506296	22.163
BERNOULLI	BSD68	42	150	0.985623	39.7845
BERNOULLI	BSD68	42	160	0.983448	38.5816
BERNOULLI	BSD68	42	170	0.981133	38.0419
BERNOULLI	BSD68	42	180	0.978018	37.2077
BERNOULLI	BSD68	42	190	0.974583	36.1915
BERNOULLI	BSD68	42	200	0.967785	34.5854
BERNOULLI	BSD68	42	210	0.959083	33.0451
BERNOULLI	BSD68	42	220	0.948314	32.2845
BERNOULLI	BSD68	42	230	0.91936	29.2553
BERNOULLI	BSD68	42	240	0.867296	27.1188
BERNOULLI	BSD68	40	150	0.884153	29.8959
BERNOULLI	BSD68	40	160	0.87132	29.4819
BERNOULLI	BSD68	40	170	0.856236	28.9931
BERNOULLI	BSD68	40	180	0.838156	28.3348
BERNOULLI	BSD68	40	190	0.822738	27.9945
BERNOULLI	BSD68	40	200	0.798071	27.5222
BERNOULLI	BSD68	40	210	0.770736	26.9284
BERNOULLI	BSD68	40	220	0.733554	25.987
BERNOULLI	BSD68	40	230	0.698024	25.4007
BERNOULLI	BSD68	40	240	0.647658	24.4311
BERNOULLI	BSD68	64	150	0.906165	26.8898
BERNOULLI	BSD68	64	160	0.891336	26.2689
BERNOULLI	BSD68	64	170	0.87809	25.8526
BERNOULLI	BSD68	64	180	0.854915	25.1908
BERNOULLI	BSD68	64	190	0.829632	24.5062
BERNOULLI	BSD68	64	200	0.804912	23.9892
BERNOULLI	BSD68	64	210	0.769134	23.3928
BERNOULLI	BSD68	64	220	0.715563	22.5871
BERNOULLI	BSD68	64	230	0.655704	21.8119
BERNOULLI	BSD68	64	240	0.555216	20.6396
BERNOULLI	BSD68	2	150	0.956434	36.7749
BERNOULLI	BSD68	2	160	0.950088	36.2943
BERNOULLI	BSD68	2	170	0.943364	35.6981
BERNOULLI	BSD68	2	180	0.93658	35.1723
BERNOULLI	BSD68	2	190	0.928241	34.5714
BERNOULLI	BSD68	2	200	0.917275	33.7983
BERNOULLI	BSD68	2	210	0.906355	33.2034
BERNOULLI	BSD68	2	220	0.890437	32.5428
BERNOULLI	BSD68	2	230	0.86814	31.1894
BERNOULLI	BSD68	2	240	0.832382	29.7676
BERNOULLI	BSD68	14	150	0.942489	30.3994
BERNOULLI	BSD68	14	160	0.933524	29.7695
BERNOULLI	BSD68	14	170	0.92026	28.8772
BERNOULLI	BSD68	14	180	0.905908	28.1872
BERNOULLI	BSD68	14	190	0.887753	27.4495
BERNOULLI	BSD68	14	200	0.865288	26.7805
BERNOULLI	BSD68	14	210	0.838872	25.8122
BERNOULLI	BSD68	14	220	0.794473	24.9481
BERNOULLI	BSD68	14	230	0.737502	23.63
BERNOULLI	BSD68	14	240	0.644637	22.1429
BERNOULLI	BSD68	24	150	0.886657	27.8629
BERNOULLI	BSD68	24	160	0.876231	27.545
BERNOULLI	BSD68	24	170	0.860366	27.1371
BERNOULLI	BSD68	24	180	0.841329	26.3407
BERNOULLI	BSD68	24	190	0.823848	25.925
BERNOULLI	BSD68	24	200	0.803253	25.4529
BERNOULLI	BSD68	24	210	0.776921	24.7489
BERNOULLI	BSD68	24	220	0.746993	24.1089
BERNOULLI	BSD68	24	230	0.708712	23.4932
BERNOULLI	BSD68	24	240	0.650895	22.1441
BERNOULLI	Set12	10	150	0.916313	32.863
BERNOULLI	Set12	10	160	0.907633	32.2115
BERNOULLI	Set12	10	170	0.897381	31.6464
BERNOULLI	Set12	10	180	0.885637	30.8976
BERNOULLI	Set12	10	190	0.872834	30.2257
BERNOULLI	Set12	10	200	0.854135	29.3661
BERNOULLI	Set12	10	210	0.835504	28.5554
BERNOULLI	Set12	10	220	0.803988	27.5682
BERNOULLI	Set12	10	230	0.759912	26.2171
BERNOULLI	Set12	10	240	0.692928	24.5897
BERNOULLI	Set12	12	150	0.93605	32.8455
BERNOULLI	Set12	12	160	0.927315	32.1786
BERNOULLI	Set12	12	170	0.917368	31.518
BERNOULLI	Set12	12	180	0.906525	30.7193
BERNOULLI	Set12	12	190	0.892884	30.1059
BERNOULLI	Set12	12	200	0.872909	29.1347
BERNOULLI	Set12	12	210	0.854075	28.3866
BERNOULLI	Set12	12	220	0.821405	27.3726
BERNOULLI	Set12	12	230	0.774756	26.1053
BERNOULLI	Set12	12	240	0.697603	24.5153
BERNOULLI	Set12	1	150	0.923891	29.3322
BERNOULLI	Set12	1	160	0.916951	28.738
BERNOULLI	Set12	1	170	0.904903	28.1091
BERNOULLI	Set12	1	180	0.897369	27.565
BERNOULLI	Set12	1	190	0.883629	26.5244
BERNOULLI	Set12	1	200	0.866829	26.2072
BERNOULLI	Set12	1	210	0.84215	24.8601
BERNOULLI	Set12	1	220	0.817272	23.7615
BERNOULLI	Set12	1	230	0.78268	22.6383
BERNOULLI	Set12	1	240	0.749964	21.9753
BERNOULLI	Set12	4	150	0.95334	32.2164
BERNOULLI	Set12	4	160	0.944679	31.1513
BERNOULLI	Set12	4	170	0.936317	30.3849
BERNOULLI	Set12	4	180	0.926356	29.5905
BERNOULLI	Set12	4	190	0.908149	28.4427
BERNOULLI	Set12	4	200	0.886775	27.2007
BERNOULLI	Set12	4	210	0.866803	26.4178
BERNOULLI	Set12	4	220	0.827813	24.9019
BERNOULLI	Set12	4	230	0.775778	23.4274
BERNOULLI	Set12	4	240	0.685573	21.6031
BERNOULLI	Set12	3	150	0.944699	25.2134
BERNOULLI	Set12	3	160	0.941107	25.1203
BERNOULLI	Set12	3	170	0.933118	24.8907
BERNOULLI	Set12	3	180	0.926962	24.7879
BERNOULLI	Set12	3	190	0.917864	24.5246
BERNOULLI	Set12	3	200	0.910419	24.4814
BERNOULLI	Set12	3	210	0.899253	24.3317
BERNOULLI	Set12	3	220	0.874933	23.546
BERNOULLI	Set12	3	230	0.85052	23.1632
BERNOULLI	Set12	3	240	0.797244	22.2119
BERNOULLI	Set12	9	150	0.9433	31.19
BERNOULLI	Set12	9	160	0.934017	30.3823
BERNOULLI	Set12	9	170	0.921678	29.4594
BERNOULLI	Set12	9	180	0.90617	28.5309
BERNOULLI	Set12	9	190	0.892654	27.8619
BERNOULLI	Set12	9	200	0.865951	26.8716
BERNOULLI	Set12	9	210	0.832041	25.7319
BERNOULLI	Set12	9	220	0.789327	24.7466
BERNOULLI	Set12	9	230	0.736254	23.7888
BERNOULLI	Set12	9	240	0.679155	22.8248
BERNOULLI	Set12	6	150	0.925181	28.5846
BERNOULLI	Set12	6	160	0.919994	28.2633
BERNOULLI	Set12	6	170	0.905006	27.3246
BERNOULLI	Set12	6	180	0.89815	26.9404
BERNOULLI	Set12	6	190	0.882223	26.184
BERNOULLI	Set12	6	200	0.868015	25.6411
BERNOULLI	Set12	6	210	0.839949	24.5148
BERNOULLI	Set12	6	220	0.820785	23.787
BERNOULLI	Set12	6	230	0.777685	22.409
BERNOULLI	Set12	6	240	0.723168	21.4007
BERNOULLI	Set12	5	150	0.969951	31.8685
BERNOULLI	Set12	5	160	0.964415	31.2087
BERNOULLI	Set12	5	170	0.958608	30.3314
BERNOULLI	Set12	5	180	0.953038	29.6178
BERNOULLI	Set12	5	190	0.94368	28.663
BERNOULLI	Set12	5	200	0.935024	27.9399
BERNOULLI	Set12	5	210	0.916643	26.3815
BERNOULLI	Set12	5	220	0.89865	25.5328
BERNOULLI	Set12	5	230	0.862838	23.9228
BERNOULLI	Set12	5	240	0.781428	20.8916
BERNOULLI	Set12	11	150	0.93641	33.0201
BERNOULLI	Set12	11	160	0.929046	32.5762
BERNOULLI	Set12	11	170	0.919986	31.9312
BERNOULLI	Set12	11	180	0.906654	31.1895
BERNOULLI	Set12	11	190	0.893344	30.5985
BERNOULLI	Set12	11	200	0.875968	29.8667
BERNOULLI	Set12	11	210	0.854023	29.1194
BERNOULLI	Set12	11	220	0.822648	28.0266
BERNOULLI	Set12	11	230	0.782418	26.9377
BERNOULLI	Set12	11	240	0.718161	25.4881
BERNOULLI	Set12	2	150	0.945481	37.128
BERNOULLI	Set12	2	160	0.939177	36.2977
BERNOULLI	Set12	2	170	0.931433	35.6492
BERNOULLI	Set12	2	180	0.920724	34.7487
BERNOULLI	Set12	2	190	0.913246	34.3001
BERNOULLI	Set12	2	200	0.901914	33.3171
BERNOULLI	Set12	2	210	0.884567	31.9668
BERNOULLI	Set12	2	220	0.868085	30.6811
BERNOULLI	Set12	2	230	0.850819	29.6049
BERNOULLI	Set12	2	240	0.813095	27.6005
BERNOULLI	Set12	7	150	0.935537	28.9211
BERNOULLI	Set12	7	160	0.931129	28.618
BERNOULLI	Set12	7	170	0.923627	28.1018
BERNOULLI	Set12	7	180	0.914597	27.4872
BERNOULLI	Set12	7	190	0.901626	26.4373
BERNOULLI	Set12	7	200	0.889431	25.8657
BERNOULLI	Set12	7	210	0.864761	24.399
BERNOULLI	Set12	7	220	0.848586	23.6076
BERNOULLI	Set12	7	230	0.818201	22.8907
BERNOULLI	Set12	7	240	0.752647	20.2581
BERNOULLI	Set12	8	150	0.949107	36.4394
BERNOULLI	Set12	8	160	0.943967	35.8417
BERNOULLI	Set12	8	170	0.937705	35.2043
BERNOULLI	Set12	8	180	0.931064	34.4624
BERNOULLI	Set12	8	190	0.922425	33.6711
BERNOULLI	Set12	8	200	0.911823	32.8473
BERNOULLI	Set12	8	210	0.900145	31.9291
BERNOULLI	Set12	8	220	0.881942	30.8715
BERNOULLI	Set12	8	230	0.860537	29.7325
BERNOULLI	Set12	8	240	0.817605	27.7124
BERNOULLI	Urban100	img_079_SRF_2_HR	150	0.935785	29.3555
BERNOULLI	Urban100	img_079_SRF_2_HR	160	0.927152	28.8737
BERNOULLI	Urban100	img_079_SRF_2_HR	170	0.916324	28.1745
BERNOULLI	Urban100	img_079_SRF_2_HR	180	0.902708	27.5062
BERNOULLI	Urban100	img_079_SRF_2_HR	190	0.883439	26.7672
BERNOULLI	Urban100	img_079_SRF_2_HR	200	0.86249	26.0307
BERNOULLI	Urban100	img_079_SRF_2_HR	210	0.833283	25.153
BERNOULLI	Urban100	img_079_SRF_2_HR	220	0.796183	24.3262
BERNOULLI	Urban100	img_079_SRF_2_HR	230	0.739734	23.2005
BERNOULLI	Urban100	img_079_SRF_2_HR	240	0.655142	21.7565
BERNOULLI	Urban100	img_013_SRF_2_HR	150	0.954858	31.4946
BERNOULLI	Urban100	img_013_SRF_2_HR	160	0.94872	31.0566
BERNOULLI	Urban100	img_013_SRF_2_HR	170	0.939888	30.0824
BERNOULLI	Urban100	img_013_SRF_2_HR	180	0.930387	29.4135
BERNOULLI	Urban100	img_013_SRF_2_HR	190	0.914932	28.4693
BERNOULLI	Urban100	img_013_SRF_2_HR	200	0.896475	27.3712
BERNOULLI	Urban100	img_013_SRF_2_HR	210	0.872526	26.301
BERNOULLI	Urban100	img_013_SRF_2_HR	220	0.839516	25.1682
BERNOULLI	Urban100	img_013_SRF_2_HR	230	0.78849	23.8068
BERNOULLI	Urban100	img_013_SRF_2_HR	240	0.696416	21.8852
BERNOULLI	Urban100	img_084_SRF_2_HR	150	0.947384	31.5995
BERNOULLI	Urban100	img_084_SRF_2_HR	160	0.938839	30.8503
BERNOULLI	Urban100	img_084_SRF_2_HR	170	0.929869	30.254
BERNOULLI	Urban100	img_084_SRF_2_HR	180	0.913715	29.2717
BERNOULLI	Urban100	img_084_SRF_2_HR	190	0.898281	28.4708
BERNOULLI	Urban100	img_084_SRF_2_HR	200	0.879793	27.6372
BERNOULLI	Urban100	img_084_SRF_2_HR	210	0.846775	26.4613
BERNOULLI	Urban100	img_084_SRF_2_HR	220	0.808664	25.4516
BERNOULLI	Urban100	img_084_SRF_2_HR	230	0.750201	24.1142
BERNOULLI	Urban100	img_084_SRF_2_HR	240	0.642826	22.3532
BERNOULLI	Urban100	img_096_SRF_2_HR	150	0.964387	29.7043
BERNOULLI	Urban100	img_096_SRF_2_HR	160	0.958606	29.0406
BERNOULLI	Urban100	img_096_SRF_2_HR	170	0.951449	28.2359
BERNOULLI	Urban100	img_096_SRF_2_HR	180	0.941287	27.3786
BERNOULLI	Urban100	img_096_SRF_2_HR	190	0.928229	26.5347
BERNOULLI	Urban100	img_096_SRF_2_HR	200	0.910584	25.5557
BERNOULLI	Urban100	img_096_SRF_2_HR	210	0.884304	24.3506
BERNOULLI	Urban100	img_096_SRF_2_HR	220	0.849565	23.2651
BERNOULLI	Urban100	img_096_SRF_2_HR	230	0.797219	21.8475
BERNOULLI	Urban100	img_096_SRF_2_HR	240	0.675196	19.859
BERNOULLI	Urban100	img_034_SRF_2_HR	150	0.872117	26.9551
BERNOULLI	Urban100	img_034_SRF_2_HR	160	0.856896	26.3831
BERNOULLI	Urban100	img_034_SRF_2_HR	170	0.840476	25.8147
BERNOULLI	Urban100	img_034_SRF_2_HR	180	0.81993	25.0031
BERNOULLI	Urban100	img_034_SRF_2_HR	190	0.794898	24.3039
BERNOULLI	Urban100	img_034_SRF_2_HR	200	0.768387	23.6362
BERNOULLI	Urban100	img_034_SRF_2_HR	210	0.727747	22.5726
BERNOULLI	Urban100	img_034_SRF_2_HR	220	0.683724	21.7062
BERNOULLI	Urban100	img_034_SRF_2_HR	230	0.622176	20.6675
BERNOULLI	Urban100	img_034_SRF_2_HR	240	0.529712	19.0431
BERNOULLI	Urban100	img_099_SRF_2_HR	150	0.783607	9.15992
BERNOULLI	Urban100	img_099_SRF_2_HR	160	0.772707	9.18439
BERNOULLI	Urban100	img_099_SRF_2_HR	170	0.754967	9.23473
BERNOULLI	Urban100	img_099_SRF_2_HR	180	0.735854	9.30729
BERNOULLI	Urban100	img_099_SRF_2_HR	190	0.71216	9.44283
BERNOULLI	Urban100	img_099_SRF_2_HR	200	0.68933	9.5136
BERNOULLI	Urban100	img_099_SRF_2_HR	210	0.647271	9.659
BERNOULLI	Urban100	img_099_SRF_2_HR	220	0.600026	9.82499
BERNOULLI	Urban100	img_099_SRF_2_HR	230	0.523606	10.1418
BERNOULLI	Urban100	img_099_SRF_2_HR	240	0.430605	10.3389
BERNOULLI	Urban100	img_024_SRF_2_HR	150	0.952898	26.3861
BERNOULLI	Urban100	img_024_SRF_2_HR	160	0.944351	25.7174
BERNOULLI	Urban100	img_024_SRF_2_HR	170	0.930715	24.837
BERNOULLI	Urban100	img_024_SRF_2_HR	180	0.913931	23.8964
BERNOULLI	Urban100	img_024_SRF_2_HR	190	0.898536	23.235
BERNOULLI	Urban100	img_024_SRF_2_HR	200	0.873411	22.2079
BERNOULLI	Urban100	img_024_SRF_2_HR	210	0.837657	21.1619
BERNOULLI	Urban100	img_024_SRF_2_HR	220	0.785272	19.925
BERNOULLI	Urban100	img_024_SRF_2_HR	230	0.706761	18.4557
BERNOULLI	Urban100	img_024_SRF_2_HR	240	0.552453	16.5206
BERNOULLI	Urban100	img_019_SRF_2_HR	150	0.919022	23.2115
BERNOULLI	Urban100	img_019_SRF_2_HR	160	0.906942	22.4783
BERNOULLI	Urban100	img_019_SRF_2_HR	170	0.891173	21.7542
BERNOULLI	Urban100	img_019_SRF_2_HR	180	0.874269	20.9969
BERNOULLI	Urban100	img_019_SRF_2_HR	190	0.854089	20.3181
BERNOULLI	Urban100	img_019_SRF_2_HR	200	0.830042	19.5217
BERNOULLI	Urban100	img_019_SRF_2_HR	210	0.797306	18.7406
BERNOULLI	Urban100	img_019_SRF_2_HR	220	0.764764	18.1449
BERNOULLI	Urban100	img_019_SRF_2_HR	230	0.697747	17.0559
BERNOULLI	Urban100	img_019_SRF_2_HR	240	0.616663	16.1598
BERNOULLI	Urban100	img_074_SRF_2_HR	150	0.912409	28.5021
BERNOULLI	Urban100	img_074_SRF_2_HR	160	0.901611	28.0361
BERNOULLI	Urban100	img_074_SRF_2_HR	170	0.883072	27.408
BERNOULLI	Urban100	img_074_SRF_2_HR	180	0.863868	26.7336
BERNOULLI	Urban100	img_074_SRF_2_HR	190	0.844642	26.1825
BERNOULLI	Urban100	img_074_SRF_2_HR	200	0.817689	25.4986
BERNOULLI	Urban100	img_074_SRF_2_HR	210	0.775266	24.6646
BERNOULLI	Urban100	img_074_SRF_2_HR	220	0.726486	23.857
BERNOULLI	Urban100	img_074_SRF_2_HR	230	0.668856	23.1058
BERNOULLI	Urban100	img_074_SRF_2_HR	240	0.593073	22.0161
BERNOULLI	Urban100	img_053_SRF_2_HR	150	0.943583	26.32
BERNOULLI	Urban100	img_053_SRF_2_HR	160	0.933613	25.6219
BERNOULLI	Urban100	img_053_SRF_2_HR	170	0.920615	24.8331
BERNOULLI	Urban100	img_053_SRF_2_HR	180	0.905019	24.0058
BERNOULLI	Urban100	img_053_SRF_2_HR	190	0.886965	23.2145
BERNOULLI	Urban100	img_053_SRF_2_HR	200	0.86259	22.29
BERNOULLI	Urban100	img_053_SRF_2_HR	210	0.828932	21.2449
BERNOULLI	Urban100	img_053_SRF_2_HR	220	0.783211	20.0949
BERNOULLI	Urban100	img_053_SRF_2_HR	230	0.706692	18.7034
BERNOULLI	Urban100	img_053_SRF_2_HR	240	0.603256	17.1919
BERNOULLI	Urban100	img_065_SRF_2_HR	150	0.952206	30.8112
BERNOULLI	Urban100	img_065_SRF_2_HR	160	0.945871	30.3022
BERNOULLI	Urban100	img_065_SRF_2_HR	170	0.936405	29.4851
BERNOULLI	Urban100	img_065_SRF_2_HR	180	0.921182	28.6021
BERNOULLI	Urban100	img_065_SRF_2_HR	190	0.905385	27.8048
BERNOULLI	Urban100	img_065_SRF_2_HR	200	0.884534	26.9387
BERNOULLI	Urban100	img_065_SRF_2_HR	210	0.854756	25.7735
BERNOULLI	Urban100	img_065_SRF_2_HR	220	0.813738	24.7007
BERNOULLI	Urban100	img_065_SRF_2_HR	230	0.742855	23.2731
BERNOULLI	Urban100	img_065_SRF_2_HR	240	0.626272	21.6863
BERNOULLI	Urban100	img_081_SRF_2_HR	150	0.939057	23.8077
BERNOULLI	Urban100	img_081_SRF_2_HR	160	0.936714	24.1895
BERNOULLI	Urban100	img_081_SRF_2_HR	170	0.933309	23.9874
BERNOULLI	Urban100	img_081_SRF_2_HR	180	0.928832	24.4479
BERNOULLI	Urban100	img_081_SRF_2_HR	190	0.922063	24.797
BERNOULLI	Urban100	img_081_SRF_2_HR	200	0.913311	24.3385
BERNOULLI	Urban100	img_081_SRF_2_HR	210	0.901438	24.328
BERNOULLI	Urban100	img_081_SRF_2_HR	220	0.883389	23.524
BERNOULLI	Urban100	img_081_SRF_2_HR	230	0.852502	22.9392
BERNOULLI	Urban100	img_081_SRF_2_HR	240	0.778569	20.7497
BERNOULLI	Urban100	img_088_SRF_2_HR	150	0.87164	23.4424
BERNOULLI	Urban100	img_088_SRF_2_HR	160	0.855612	23.0221
BERNOULLI	Urban100	img_088_SRF_2_HR	170	0.836577	22.3783
BERNOULLI	Urban100	img_088_SRF_2_HR	180	0.808058	21.807
BERNOULLI	Urban100	img_088_SRF_2_HR	190	0.780599	21.2265
BERNOULLI	Urban100	img_088_SRF_2_HR	200	0.740397	20.5422
BERNOULLI	Urban100	img_088_SRF_2_HR	210	0.703396	19.9724
BERNOULLI	Urban100	img_088_SRF_2_HR	220	0.642782	19.1084
BERNOULLI	Urban100	img_088_SRF_2_HR	230	0.576793	18.2848
BERNOULLI	Urban100	img_088_SRF_2_HR	240	0.470248	17.2596
BERNOULLI	Urban100	img_016_SRF_2_HR	150	0.660504	5.40196
BERNOULLI	Urban100	img_016_SRF_2_HR	160	0.658212	5.43219
BERNOULLI	Urban100	img_016_SRF_2_HR	170	0.655951	5.4713
BERNOULLI	Urban100	img_016_SRF_2_HR	180	0.652637	5.53692
BERNOULLI	Urban100	img_016_SRF_2_HR	190	0.64844	5.63056
BERNOULLI	Urban100	img_016_SRF_2_HR	200	0.641624	5.75378
BERNOULLI	Urban100	img_016_SRF_2_HR	210	0.633941	5.93719
BERNOULLI	Urban100	img_016_SRF_2_HR	220	0.620826	6.22132
BERNOULLI	Urban100	img_016_SRF_2_HR	230	0.591717	6.37925
BERNOULLI	Urban100	img_016_SRF_2_HR	240	0.54593	6.48083
BERNOULLI	Urban100	img_017_SRF_2_HR	150	0.954092	28.934
BERNOULLI	Urban100	img_017_SRF_2_HR	160	0.945791	28.2202
BERNOULLI	Urban100	img_017_SRF_2_HR	170	0.937546	27.5269
BERNOULLI	Urban100	img_017_SRF_2_HR	180	0.925969	26.7073
BERNOULLI	Urban100	img_017_SRF_2_HR	190	0.912088	26.0058
BERNOULLI	Urban100	img_017_SRF_2_HR	200	0.893666	25.1294
BERNOULLI	Urban100	img_017_SRF_2_HR	210	0.870061	24.2588
BERNOULLI	Urban100	img_017_SRF_2_HR	220	0.833972	23.132
BERNOULLI	Urban100	img_017_SRF_2_HR	230	0.779218	21.8412
BERNOULLI	Urban100	img_017_SRF_2_HR	240	0.697338	20.4186
BERNOULLI	Urban100	img_059_SRF_2_HR	150	0.937929	28.73
BERNOULLI	Urban100	img_059_SRF_2_HR	160	0.928275	28.1181
BERNOULLI	Urban100	img_059_SRF_2_HR	170	0.919963	27.5129
BERNOULLI	Urban100	img_059_SRF_2_HR	180	0.906951	26.9088
BERNOULLI	Urban100	img_059_SRF_2_HR	190	0.888579	25.9808
BERNOULLI	Urban100	img_059_SRF_2_HR	200	0.872177	25.3394
BERNOULLI	Urban100	img_059_SRF_2_HR	210	0.848485	24.607
BERNOULLI	Urban100	img_059_SRF_2_HR	220	0.805129	23.6254
BERNOULLI	Urban100	img_059_SRF_2_HR	230	0.758933	22.7008
BERNOULLI	Urban100	img_059_SRF_2_HR	240	0.694811	21.4037
BERNOULLI	Urban100	img_066_SRF_2_HR	150	0.929752	28.2425
BERNOULLI	Urban100	img_066_SRF_2_HR	160	0.919118	27.5854
BERNOULLI	Urban100	img_066_SRF_2_HR	170	0.903814	26.7826
BERNOULLI	Urban100	img_066_SRF_2_HR	180	0.890499	26.2295
BERNOULLI	Urban100	img_066_SRF_2_HR	190	0.874161	25.5891
BERNOULLI	Urban100	img_066_SRF_2_HR	200	0.85158	24.932
BERNOULLI	Urban100	img_066_SRF_2_HR	210	0.820309	23.9996
BERNOULLI	Urban100	img_066_SRF_2_HR	220	0.783534	23.2606
BERNOULLI	Urban100	img_066_SRF_2_HR	230	0.72423	22.0484
BERNOULLI	Urban100	img_066_SRF_2_HR	240	0.631333	20.6933
BERNOULLI	Urban100	img_078_SRF_2_HR	150	0.906306	29.5691
BERNOULLI	Urban100	img_078_SRF_2_HR	160	0.893301	28.8612
BERNOULLI	Urban100	img_078_SRF_2_HR	170	0.878133	28.2758
BERNOULLI	Urban100	img_078_SRF_2_HR	180	0.866476	27.8696
BERNOULLI	Urban100	img_078_SRF_2_HR	190	0.843168	27.1692
BERNOULLI	Urban100	img_078_SRF_2_HR	200	0.819513	26.5864
BERNOULLI	Urban100	img_078_SRF_2_HR	210	0.785992	25.6873
BERNOULLI	Urban100	img_078_SRF_2_HR	220	0.749505	25.0744
BERNOULLI	Urban100	img_078_SRF_2_HR	230	0.690743	24.18
BERNOULLI	Urban100	img_078_SRF_2_HR	240	0.618259	22.9299
BERNOULLI	Urban100	img_073_SRF_2_HR	150	0.873765	24.5041
BERNOULLI	Urban100	img_073_SRF_2_HR	160	0.854642	23.8625
BERNOULLI	Urban100	img_073_SRF_2_HR	170	0.833493	23.281
BERNOULLI	Urban100	img_073_SRF_2_HR	180	0.810466	22.7924
BERNOULLI	Urban100	img_073_SRF_2_HR	190	0.778027	22.144
BERNOULLI	Urban100	img_073_SRF_2_HR	200	0.741817	21.4623
BERNOULLI	Urban100	img_073_SRF_2_HR	210	0.696827	20.7326
BERNOULLI	Urban100	img_073_SRF_2_HR	220	0.627927	19.9126
BERNOULLI	Urban100	img_073_SRF_2_HR	230	0.541062	18.972
BERNOULLI	Urban100	img_073_SRF_2_HR	240	0.409569	17.8266
BERNOULLI	Urban100	img_067_SRF_2_HR	150	0.943239	23.2011
BERNOULLI	Urban100	img_067_SRF_2_HR	160	0.936526	22.5746
BERNOULLI	Urban100	img_067_SRF_2_HR	170	0.927275	21.9055
BERNOULLI	Urban100	img_067_SRF_2_HR	180	0.915135	21.1436
BERNOULLI	Urban100	img_067_SRF_2_HR	190	0.897075	20.2709
BERNOULLI	Urban100	img_067_SRF_2_HR	200	0.876471	19.2733
BERNOULLI	Urban100	img_067_SRF_2_HR	210	0.853079	18.5336
BERNOULLI	Urban100	img_067_SRF_2_HR	220	0.805799	17.2256
BERNOULLI	Urban100	img_067_SRF_2_HR	230	0.739079	15.8431
BERNOULLI	Urban100	img_067_SRF_2_HR	240	0.621525	14.1101
BERNOULLI	Urban100	img_033_SRF_2_HR	150	0.937055	31.8109
BERNOULLI	Urban100	img_033_SRF_2_HR	160	0.926717	31.067
BERNOULLI	Urban100	img_033_SRF_2_HR	170	0.915766	30.2936
BERNOULLI	Urban100	img_033_SRF_2_HR	180	0.902854	29.6692
BERNOULLI	Urban100	img_033_SRF_2_HR	190	0.884194	28.6244
BERNOULLI	Urban100	img_033_SRF_2_HR	200	0.862187	27.8692
BERNOULLI	Urban100	img_033_SRF_2_HR	210	0.837095	26.95
BERNOULLI	Urban100	img_033_SRF_2_HR	220	0.796617	25.6131
BERNOULLI	Urban100	img_033_SRF_2_HR	230	0.748144	24.4443
BERNOULLI	Urban100	img_033_SRF_2_HR	240	0.658491	22.6108
BERNOULLI	Urban100	img_087_SRF_2_HR	150	0.973377	31.0458
BERNOULLI	Urban100	img_087_SRF_2_HR	160	0.967901	30.2139
BERNOULLI	Urban100	img_087_SRF_2_HR	170	0.962266	29.3796
BERNOULLI	Urban100	img_087_SRF_2_HR	180	0.954126	28.4873
BERNOULLI	Urban100	img_087_SRF_2_HR	190	0.94292	27.5344
BERNOULLI	Urban100	img_087_SRF_2_HR	200	0.929243	26.4357
BERNOULLI	Urban100	img_087_SRF_2_HR	210	0.90751	25.2786
BERNOULLI	Urban100	img_087_SRF_2_HR	220	0.878461	23.9639
BERNOULLI	Urban100	img_087_SRF_2_HR	230	0.832814	22.4583
BERNOULLI	Urban100	img_087_SRF_2_HR	240	0.739849	20.4
BERNOULLI	Urban100	img_100_SRF_2_HR	150	0.939501	30.7753
BERNOULLI	Urban100	img_100_SRF_2_HR	160	0.931706	30.0278
BERNOULLI	Urban100	img_100_SRF_2_HR	170	0.923319	29.249
BERNOULLI	Urban100	img_100_SRF_2_HR	180	0.912172	28.4497
BERNOULLI	Urban100	img_100_SRF_2_HR	190	0.900396	27.5517
BERNOULLI	Urban100	img_100_SRF_2_HR	200	0.885119	26.6013
BERNOULLI	Urban100	img_100_SRF_2_HR	210	0.860042	25.2207
BERNOULLI	Urban100	img_100_SRF_2_HR	220	0.828306	23.7483
BERNOULLI	Urban100	img_100_SRF_2_HR	230	0.783006	22.0709
BERNOULLI	Urban100	img_100_SRF_2_HR	240	0.700999	19.6925
BERNOULLI	Urban100	img_049_SRF_2_HR	150	0.936906	24.8873
BERNOULLI	Urban100	img_049_SRF_2_HR	160	0.925566	24.385
BERNOULLI	Urban100	img_049_SRF_2_HR	170	0.912939	23.7001
BERNOULLI	Urban100	img_049_SRF_2_HR	180	0.894512	23.0266
BERNOULLI	Urban100	img_049_SRF_2_HR	190	0.876446	22.2477
BERNOULLI	Urban100	img_049_SRF_2_HR	200	0.850989	21.5469
BERNOULLI	Urban100	img_049_SRF_2_HR	210	0.817622	20.6873
BERNOULLI	Urban100	img_049_SRF_2_HR	220	0.772719	19.6242
BERNOULLI	Urban100	img_049_SRF_2_HR	230	0.698852	18.4056
BERNOULLI	Urban100	img_049_SRF_2_HR	240	0.574801	16.7346
BERNOULLI	Urban100	img_085_SRF_2_HR	150	0.968533	30.5631
BERNOULLI	Urban100	img_085_SRF_2_HR	160	0.965213	30.1259
BERNOULLI	Urban100	img_085_SRF_2_HR	170	0.959516	29.4634
BERNOULLI	Urban100	img_085_SRF_2_HR	180	0.951539	28.6142
BERNOULLI	Urban100	img_085_SRF_2_HR	190	0.942456	27.7772
BERNOULLI	Urban100	img_085_SRF_2_HR	200	0.932858	27.0467
BERNOULLI	Urban100	img_085_SRF_2_HR	210	0.91744	26.0265
BERNOULLI	Urban100	img_085_SRF_2_HR	220	0.89449	25.1
BERNOULLI	Urban100	img_085_SRF_2_HR	230	0.867352	23.9263
BERNOULLI	Urban100	img_085_SRF_2_HR	240	0.803065	22.116
BERNOULLI	Urban100	img_070_SRF_2_HR	150	0.895553	28.3733
BERNOULLI	Urban100	img_070_SRF_2_HR	160	0.883178	27.806
BERNOULLI	Urban100	img_070_SRF_2_HR	170	0.867601	27.2699
BERNOULLI	Urban100	img_070_SRF_2_HR	180	0.849644	26.76
BERNOULLI	Urban100	img_070_SRF_2_HR	190	0.829656	26.1745
BERNOULLI	Urban100	img_070_SRF_2_HR	200	0.804265	25.5051
BERNOULLI	Urban100	img_070_SRF_2_HR	210	0.778874	24.948
BERNOULLI	Urban100	img_070_SRF_2_HR	220	0.741312	24.0819
BERNOULLI	Urban100	img_070_SRF_2_HR	230	0.69164	23.2081
BERNOULLI	Urban100	img_070_SRF_2_HR	240	0.614934	21.9759
BERNOULLI	Urban100	img_038_SRF_2_HR	150	0.903681	31.7032
BERNOULLI	Urban100	img_038_SRF_2_HR	160	0.886723	30.8873
BERNOULLI	Urban100	img_038_SRF_2_HR	170	0.870951	30.2353
BERNOULLI	Urban100	img_038_SRF_2_HR	180	0.848218	29.5171
BERNOULLI	Urban100	img_038_SRF_2_HR	190	0.824969	28.8872
BERNOULLI	Urban100	img_038_SRF_2_HR	200	0.79072	28.0816
BERNOULLI	Urban100	img_038_SRF_2_HR	210	0.749255	27.2486
BERNOULLI	Urban100	img_038_SRF_2_HR	220	0.6978	26.3606
BERNOULLI	Urban100	img_038_SRF_2_HR	230	0.612305	25.2174
BERNOULLI	Urban100	img_038_SRF_2_HR	240	0.50725	23.9479
BERNOULLI	Urban100	img_052_SRF_2_HR	150	0.970165	32.327
BERNOULLI	Urban100	img_052_SRF_2_HR	160	0.964012	31.4625
BERNOULLI	Urban100	img_052_SRF_2_HR	170	0.958678	30.8189
BERNOULLI	Urban100	img_052_SRF_2_HR	180	0.948685	29.7053
BERNOULLI	Urban100	img_052_SRF_2_HR	190	0.937997	28.6973
BERNOULLI	Urban100	img_052_SRF_2_HR	200	0.917637	27.4285
BERNOULLI	Urban100	img_052_SRF_2_HR	210	0.902779	26.4834
BERNOULLI	Urban100	img_052_SRF_2_HR	220	0.864141	24.7379
BERNOULLI	Urban100	img_052_SRF_2_HR	230	0.812065	22.9156
BERNOULLI	Urban100	img_052_SRF_2_HR	240	0.710817	20.6483
BERNOULLI	Urban100	img_060_SRF_2_HR	150	0.90878	27.9512
BERNOULLI	Urban100	img_060_SRF_2_HR	160	0.896009	27.2922
BERNOULLI	Urban100	img_060_SRF_2_HR	170	0.878753	26.5856
BERNOULLI	Urban100	img_060_SRF_2_HR	180	0.860234	25.9748
BERNOULLI	Urban100	img_060_SRF_2_HR	190	0.837375	25.3116
BERNOULLI	Urban100	img_060_SRF_2_HR	200	0.804523	24.4959
BERNOULLI	Urban100	img_060_SRF_2_HR	210	0.768434	23.6978
BERNOULLI	Urban100	img_060_SRF_2_HR	220	0.725179	22.8739
BERNOULLI	Urban100	img_060_SRF_2_HR	230	0.655481	21.6952
BERNOULLI	Urban100	img_060_SRF_2_HR	240	0.561924	20.5163
BERNOULLI	Urban100	img_029_SRF_2_HR	150	0.942907	29.4833
BERNOULLI	Urban100	img_029_SRF_2_HR	160	0.933601	28.6912
BERNOULLI	Urban100	img_029_SRF_2_HR	170	0.92143	27.8875
BERNOULLI	Urban100	img_029_SRF_2_HR	180	0.909881	27.1887
BERNOULLI	Urban100	img_029_SRF_2_HR	190	0.891588	26.3295
BERNOULLI	Urban100	img_029_SRF_2_HR	200	0.867824	25.3836
BERNOULLI	Urban100	img_029_SRF_2_HR	210	0.835036	24.3811
BERNOULLI	Urban100	img_029_SRF_2_HR	220	0.792626	23.2627
BERNOULLI	Urban100	img_029_SRF_2_HR	230	0.733218	21.9977
BERNOULLI	Urban100	img_029_SRF_2_HR	240	0.632022	20.2855
BERNOULLI	Urban100	img_076_SRF_2_HR	150	0.9087	25.8968
BERNOULLI	Urban100	img_076_SRF_2_HR	160	0.895273	25.3151
BERNOULLI	Urban100	img_076_SRF_2_HR	170	0.877964	24.733
BERNOULLI	Urban100	img_076_SRF_2_HR	180	0.860809	24.1554
BERNOULLI	Urban100	img_076_SRF_2_HR	190	0.836522	23.5076
BERNOULLI	Urban100	img_076_SRF_2_HR	200	0.810218	22.8973
BERNOULLI	Urban100	img_076_SRF_2_HR	210	0.778608	22.1845
BERNOULLI	Urban100	img_076_SRF_2_HR	220	0.731702	21.4409
BERNOULLI	Urban100	img_076_SRF_2_HR	230	0.663534	20.3372
BERNOULLI	Urban100	img_076_SRF_2_HR	240	0.58267	19.1955
BERNOULLI	Urban100	img_050_SRF_2_HR	150	0.922225	27.2305
BERNOULLI	Urban100	img_050_SRF_2_HR	160	0.911009	26.6663
BERNOULLI	Urban100	img_050_SRF_2_HR	170	0.896739	26.0424
BERNOULLI	Urban100	img_050_SRF_2_HR	180	0.882039	25.4006
BERNOULLI	Urban100	img_050_SRF_2_HR	190	0.859733	24.7916
BERNOULLI	Urban100	img_050_SRF_2_HR	200	0.837422	24.1672
BERNOULLI	Urban100	img_050_SRF_2_HR	210	0.81034	23.5143
BERNOULLI	Urban100	img_050_SRF_2_HR	220	0.76451	22.6585
BERNOULLI	Urban100	img_050_SRF_2_HR	230	0.708193	21.661
BERNOULLI	Urban100	img_050_SRF_2_HR	240	0.623998	20.5024
BERNOULLI	Urban100	img_095_SRF_2_HR	150	0.841705	25.4389
BERNOULLI	Urban100	img_095_SRF_2_HR	160	0.820009	24.8988
BERNOULLI	Urban100	img_095_SRF_2_HR	170	0.792992	24.2525
BERNOULLI	Urban100	img_095_SRF_2_HR	180	0.766541	23.6886
BERNOULLI	Urban100	img_095_SRF_2_HR	190	0.731454	23.1011
BERNOULLI	Urban100	img_095_SRF_2_HR	200	0.688254	22.4226
BERNOULLI	Urban100	img_095_SRF_2_HR	210	0.639641	21.7668
BERNOULLI	Urban100	img_095_SRF_2_HR	220	0.577422	21.081
BERNOULLI	Urban100	img_095_SRF_2_HR	230	0.493721	20.2096
BERNOULLI	Urban100	img_095_SRF_2_HR	240	0.381686	19.0223
BERNOULLI	Urban100	img_020_SRF_2_HR	150	0.907557	24.7279
BERNOULLI	Urban100	img_020_SRF_2_HR	160	0.89358	24.1101
BERNOULLI	Urban100	img_020_SRF_2_HR	170	0.877496	23.5043
BERNOULLI	Urban100	img_020_SRF_2_HR	180	0.859497	22.8968
BERNOULLI	Urban100	img_020_SRF_2_HR	190	0.833805	22.183
BERNOULLI	Urban100	img_020_SRF_2_HR	200	0.805293	21.5028
BERNOULLI	Urban100	img_020_SRF_2_HR	210	0.770888	20.7212
BERNOULLI	Urban100	img_020_SRF_2_HR	220	0.719176	19.9356
BERNOULLI	Urban100	img_020_SRF_2_HR	230	0.65916	19.0044
BERNOULLI	Urban100	img_020_SRF_2_HR	240	0.560679	17.8712
BERNOULLI	Urban100	img_045_SRF_2_HR	150	0.965043	29.1895
BERNOULLI	Urban100	img_045_SRF_2_HR	160	0.957284	28.3692
BERNOULLI	Urban100	img_045_SRF_2_HR	170	0.948406	27.5154
BERNOULLI	Urban100	img_045_SRF_2_HR	180	0.933647	26.6069
BERNOULLI	Urban100	img_045_SRF_2_HR	190	0.916554	25.5513
BERNOULLI	Urban100	img_045_SRF_2_HR	200	0.898058	24.7223
BERNOULLI	Urban100	img_045_SRF_2_HR	210	0.866747	23.6355
BERNOULLI	Urban100	img_045_SRF_2_HR	220	0.815524	22.2803
BERNOULLI	Urban100	img_045_SRF_2_HR	230	0.730954	20.795
BERNOULLI	Urban100	img_045_SRF_2_HR	240	0.575418	18.6247
BERNOULLI	Urban100	img_006_SRF_2_HR	150	0.905429	26.6628
BERNOULLI	Urban100	img_006_SRF_2_HR	160	0.890319	25.9579
BERNOULLI	Urban100	img_006_SRF_2_HR	170	0.872337	25.245
BERNOULLI	Urban100	img_006_SRF_2_HR	180	0.85491	24.6766
BERNOULLI	Urban100	img_006_SRF_2_HR	190	0.828323	23.8047
BERNOULLI	Urban100	img_006_SRF_2_HR	200	0.798401	23.0549
BERNOULLI	Urban100	img_006_SRF_2_HR	210	0.75241	22.0221
BERNOULLI	Urban100	img_006_SRF_2_HR	220	0.704208	21.0832
BERNOULLI	Urban100	img_006_SRF_2_HR	230	0.626215	20.0431
BERNOULLI	Urban100	img_006_SRF_2_HR	240	0.511131	18.5886
BERNOULLI	Urban100	img_043_SRF_2_HR	150	0.972047	31.0583
BERNOULLI	Urban100	img_043_SRF_2_HR	160	0.967503	30.223
BERNOULLI	Urban100	img_043_SRF_2_HR	170	0.961554	29.456
BERNOULLI	Urban100	img_043_SRF_2_HR	180	0.955029	28.5944
BERNOULLI	Urban100	img_043_SRF_2_HR	190	0.94682	27.4616
BERNOULLI	Urban100	img_043_SRF_2_HR	200	0.93304	25.579
BERNOULLI	Urban100	img_043_SRF_2_HR	210	0.918865	24.57
BERNOULLI	Urban100	img_043_SRF_2_HR	220	0.89332	22.7194
BERNOULLI	Urban100	img_043_SRF_2_HR	230	0.849088	20.398
BERNOULLI	Urban100	img_043_SRF_2_HR	240	0.766164	17.2012
BERNOULLI	Urban100	img_063_SRF_2_HR	150	0.921771	25.3288
BERNOULLI	Urban100	img_063_SRF_2_HR	160	0.910712	24.4534
BERNOULLI	Urban100	img_063_SRF_2_HR	170	0.898493	23.7404
BERNOULLI	Urban100	img_063_SRF_2_HR	180	0.883253	23.0168
BERNOULLI	Urban100	img_063_SRF_2_HR	190	0.865385	22.1645
BERNOULLI	Urban100	img_063_SRF_2_HR	200	0.840736	21.2159
BERNOULLI	Urban100	img_063_SRF_2_HR	210	0.807684	20.1283
BERNOULLI	Urban100	img_063_SRF_2_HR	220	0.752576	18.8336
BERNOULLI	Urban100	img_063_SRF_2_HR	230	0.673298	17.2624
BERNOULLI	Urban100	img_063_SRF_2_HR	240	0.566482	15.7487
BERNOULLI	Urban100	img_007_SRF_2_HR	150	0.963383	31.3294
BERNOULLI	Urban100	img_007_SRF_2_HR	160	0.956812	30.5276
BERNOULLI	Urban100	img_007_SRF_2_HR	170	0.948771	29.7904
BERNOULLI	Urban100	img_007_SRF_2_HR	180	0.936887	28.8448
BERNOULLI	Urban100	img_007_SRF_2_HR	190	0.924165	27.9265
BERNOULLI	Urban100	img_007_SRF_2_HR	200	0.906303	26.819
BERNOULLI	Urban100	img_007_SRF_2_HR	210	0.88661	25.9704
BERNOULLI	Urban100	img_007_SRF_2_HR	220	0.852728	24.6597
BERNOULLI	Urban100	img_007_SRF_2_HR	230	0.794808	22.7331
BERNOULLI	Urban100	img_007_SRF_2_HR	240	0.703106	20.8032
BERNOULLI	Urban100	img_077_SRF_2_HR	150	0.901514	27.465
BERNOULLI	Urban100	img_077_SRF_2_HR	160	0.887529	26.884
BERNOULLI	Urban100	img_077_SRF_2_HR	170	0.872801	26.3425
BERNOULLI	Urban100	img_077_SRF_2_HR	180	0.855132	25.8555
BERNOULLI	Urban100	img_077_SRF_2_HR	190	0.833319	25.2176
BERNOULLI	Urban100	img_077_SRF_2_HR	200	0.807722	24.5547
BERNOULLI	Urban100	img_077_SRF_2_HR	210	0.778555	24.0219
BERNOULLI	Urban100	img_077_SRF_2_HR	220	0.744807	23.3652
BERNOULLI	Urban100	img_077_SRF_2_HR	230	0.692956	22.5103
BERNOULLI	Urban100	img_077_SRF_2_HR	240	0.61599	21.3503
BERNOULLI	Urban100	img_054_SRF_2_HR	150	0.930065	26.5472
BERNOULLI	Urban100	img_054_SRF_2_HR	160	0.920155	25.8728
BERNOULLI	Urban100	img_054_SRF_2_HR	170	0.905903	25.1359
BERNOULLI	Urban100	img_054_SRF_2_HR	180	0.893038	24.5286
BERNOULLI	Urban100	img_054_SRF_2_HR	190	0.872653	23.6999
BERNOULLI	Urban100	img_054_SRF_2_HR	200	0.848466	22.9528
BERNOULLI	Urban100	img_054_SRF_2_HR	210	0.821426	22.1806
BERNOULLI	Urban100	img_054_SRF_2_HR	220	0.777126	21.2662
BERNOULLI	Urban100	img_054_SRF_2_HR	230	0.712651	20.0594
BERNOULLI	Urban100	img_054_SRF_2_HR	240	0.616997	18.9181
BERNOULLI	Urban100	img_068_SRF_2_HR	150	0.961432	32.4301
BERNOULLI	Urban100	img_068_SRF_2_HR	160	0.954177	31.6974
BERNOULLI	Urban100	img_068_SRF_2_HR	170	0.944907	30.8698
BERNOULLI	Urban100	img_068_SRF_2_HR	180	0.93467	30.1552
BERNOULLI	Urban100	img_068_SRF_2_HR	190	0.919704	29.2392
BERNOULLI	Urban100	img_068_SRF_2_HR	200	0.89836	28.0858
BERNOULLI	Urban100	img_068_SRF_2_HR	210	0.871157	27.131
BERNOULLI	Urban100	img_068_SRF_2_HR	220	0.83247	25.9437
BERNOULLI	Urban100	img_068_SRF_2_HR	230	0.774529	24.4943
BERNOULLI	Urban100	img_068_SRF_2_HR	240	0.680004	22.8895
BERNOULLI	Urban100	img_089_SRF_2_HR	150	0.919416	30.2007
BERNOULLI	Urban100	img_089_SRF_2_HR	160	0.908127	29.6965
BERNOULLI	Urban100	img_089_SRF_2_HR	170	0.894317	29.0299
BERNOULLI	Urban100	img_089_SRF_2_HR	180	0.878243	28.4524
BERNOULLI	Urban100	img_089_SRF_2_HR	190	0.857589	27.6732
BERNOULLI	Urban100	img_089_SRF_2_HR	200	0.834452	27.066
BERNOULLI	Urban100	img_089_SRF_2_HR	210	0.806039	26.35
BERNOULLI	Urban100	img_089_SRF_2_HR	220	0.765878	25.5304
BERNOULLI	Urban100	img_089_SRF_2_HR	230	0.698129	24.2304
BERNOULLI	Urban100	img_089_SRF_2_HR	240	0.60931	22.8818
BERNOULLI	Urban100	img_010_SRF_2_HR	150	0.96002	31.8483
BERNOULLI	Urban100	img_010_SRF_2_HR	160	0.952389	30.9116
BERNOULLI	Urban100	img_010_SRF_2_HR	170	0.947513	30.4327
BERNOULLI	Urban100	img_010_SRF_2_HR	180	0.939428	29.7355
BERNOULLI	Urban100	img_010_SRF_2_HR	190	0.92675	28.572
BERNOULLI	Urban100	img_010_SRF_2_HR	200	0.908458	27.4143
BERNOULLI	Urban100	img_010_SRF_2_HR	210	0.891976	26.6155
BERNOULLI	Urban100	img_010_SRF_2_HR	220	0.86086	25.3427
BERNOULLI	Urban100	img_010_SRF_2_HR	230	0.821306	23.8827
BERNOULLI	Urban100	img_010_SRF_2_HR	240	0.755435	22.211
BERNOULLI	Urban100	img_097_SRF_2_HR	150	0.948199	29.1572
BERNOULLI	Urban100	img_097_SRF_2_HR	160	0.941221	28.6372
BERNOULLI	Urban100	img_097_SRF_2_HR	170	0.929518	27.8744
BERNOULLI	Urban100	img_097_SRF_2_HR	180	0.918778	27.1658
BERNOULLI	Urban100	img_097_SRF_2_HR	190	0.902464	26.2768
BERNOULLI	Urban100	img_097_SRF_2_HR	200	0.881491	25.4292
BERNOULLI	Urban100	img_097_SRF_2_HR	210	0.853953	24.4231
BERNOULLI	Urban100	img_097_SRF_2_HR	220	0.817209	23.4762
BERNOULLI	Urban100	img_097_SRF_2_HR	230	0.761078	22.2758
BERNOULLI	Urban100	img_097_SRF_2_HR	240	0.673099	20.8671
BERNOULLI	Urban100	img_062_SRF_2_HR	150	0.921387	25.6467
BERNOULLI	Urban100	img_062_SRF_2_HR	160	0.909876	24.9822
BERNOULLI	Urban100	img_062_SRF_2_HR	170	0.893467	24.2224
BERNOULLI	Urban100	img_062_SRF_2_HR	180	0.87655	23.579
BERNOULLI	Urban100	img_062_SRF_2_HR	190	0.852607	22.7593
BERNOULLI	Urban100	img_062_SRF_2_HR	200	0.824533	22.1241
BERNOULLI	Urban100	img_062_SRF_2_HR	210	0.784757	21.2502
BERNOULLI	Urban100	img_062_SRF_2_HR	220	0.734525	20.2008
BERNOULLI	Urban100	img_062_SRF_2_HR	230	0.676199	19.3282
BERNOULLI	Urban100	img_062_SRF_2_HR	240	0.579773	17.9958
BERNOULLI	Urban100	img_069_SRF_2_HR	150	0.933421	28.629
BERNOULLI	Urban100	img_069_SRF_2_HR	160	0.922509	27.9586
BERNOULLI	Urban100	img_069_SRF_2_HR	170	0.908936	27.3641
BERNOULLI	Urban100	img_069_SRF_2_HR	180	0.896873	26.7337
BERNOULLI	Urban100	img_069_SRF_2_HR	190	0.879084	26.1101
BERNOULLI	Urban100	img_069_SRF_2_HR	200	0.857246	25.403
BERNOULLI	Urban100	img_069_SRF_2_HR	210	0.829313	24.594
BERNOULLI	Urban100	img_069_SRF_2_HR	220	0.782919	23.5667
BERNOULLI	Urban100	img_069_SRF_2_HR	230	0.725209	22.4094
BERNOULLI	Urban100	img_069_SRF_2_HR	240	0.621516	21.0212
BERNOULLI	Urban100	img_047_SRF_2_HR	150	0.920205	25.4809
BERNOULLI	Urban100	img_047_SRF_2_HR	160	0.911927	25.1227
BERNOULLI	Urban100	img_047_SRF_2_HR	170	0.89792	24.4707
BERNOULLI	Urban100	img_047_SRF_2_HR	180	0.881984	23.8453
BERNOULLI	Urban100	img_047_SRF_2_HR	190	0.86262	23.0586
BERNOULLI	Urban100	img_047_SRF_2_HR	200	0.832945	22.2745
BERNOULLI	Urban100	img_047_SRF_2_HR	210	0.803765	21.6424
BERNOULLI	Urban100	img_047_SRF_2_HR	220	0.761242	20.7282
BERNOULLI	Urban100	img_047_SRF_2_HR	230	0.692122	19.6244
BERNOULLI	Urban100	img_047_SRF_2_HR	240	0.599607	18.602
BERNOULLI	Urban100	img_039_SRF_2_HR	150	0.921627	27.44
BERNOULLI	Urban100	img_039_SRF_2_HR	160	0.909538	26.582
BERNOULLI	Urban100	img_039_SRF_2_HR	170	0.895458	25.9763
BERNOULLI	Urban100	img_039_SRF_2_HR	180	0.876119	25.1625
BERNOULLI	Urban100	img_039_SRF_2_HR	190	0.854793	24.4918
BERNOULLI	Urban100	img_039_SRF_2_HR	200	0.824863	23.4666
BERNOULLI	Urban100	img_039_SRF_2_HR	210	0.787624	22.4574
BERNOULLI	Urban100	img_039_SRF_2_HR	220	0.740331	21.5646
BERNOULLI	Urban100	img_039_SRF_2_HR	230	0.679716	20.4829
BERNOULLI	Urban100	img_039_SRF_2_HR	240	0.579038	18.9251
BERNOULLI	Urban100	img_044_SRF_2_HR	150	0.968636	33.1665
BERNOULLI	Urban100	img_044_SRF_2_HR	160	0.962194	32.4703
BERNOULLI	Urban100	img_044_SRF_2_HR	170	0.952513	31.3735
BERNOULLI	Urban100	img_044_SRF_2_HR	180	0.941618	30.5368
BERNOULLI	Urban100	img_044_SRF_2_HR	190	0.925521	29.4224
BERNOULLI	Urban100	img_044_SRF_2_HR	200	0.906117	28.3845
BERNOULLI	Urban100	img_044_SRF_2_HR	210	0.877895	27.2158
BERNOULLI	Urban100	img_044_SRF_2_HR	220	0.828437	25.6433
BERNOULLI	Urban100	img_044_SRF_2_HR	230	0.747851	23.9184
BERNOULLI	Urban100	img_044_SRF_2_HR	240	0.584921	21.6391
BERNOULLI	Urban100	img_082_SRF_2_HR	150	0.97761	33.8844
BERNOULLI	Urban100	img_082_SRF_2_HR	160	0.974547	32.9756
BERNOULLI	Urban100	img_082_SRF_2_HR	170	0.970837	32.2336
BERNOULLI	Urban100	img_082_SRF_2_HR	180	0.966423	31.369
BERNOULLI	Urban100	img_082_SRF_2_HR	190	0.960215	30.3502
BERNOULLI	Urban100	img_082_SRF_2_HR	200	0.951522	29.2674
BERNOULLI	Urban100	img_082_SRF_2_HR	210	0.940913	28.0523
BERNOULLI	Urban100	img_082_SRF_2_HR	220	0.923052	26.5437
BERNOULLI	Urban100	img_082_SRF_2_HR	230	0.896268	24.8362
BERNOULLI	Urban100	img_082_SRF_2_HR	240	0.843798	22.6253
BERNOULLI	Urban100	img_015_SRF_2_HR	150	0.942612	29.5639
BERNOULLI	Urban100	img_015_SRF_2_HR	160	0.935601	29.0268
BERNOULLI	Urban100	img_015_SRF_2_HR	170	0.925458	28.3447
BERNOULLI	Urban100	img_015_SRF_2_HR	180	0.915007	27.4904
BERNOULLI	Urban100	img_015_SRF_2_HR	190	0.901818	26.7724
BERNOULLI	Urban100	img_015_SRF_2_HR	200	0.88043	25.6896
BERNOULLI	Urban100	img_015_SRF_2_HR	210	0.855584	24.6665
BERNOULLI	Urban100	img_015_SRF_2_HR	220	0.823065	23.5589
BERNOULLI	Urban100	img_015_SRF_2_HR	230	0.770495	22.3317
BERNOULLI	Urban100	img_015_SRF_2_HR	240	0.669583	20.0745
BERNOULLI	Urban100	img_072_SRF_2_HR	150	0.951203	22.9347
BERNOULLI	Urban100	img_072_SRF_2_HR	160	0.941524	22.1479
BERNOULLI	Urban100	img_072_SRF_2_HR	170	0.928083	21.2885
BERNOULLI	Urban100	img_072_SRF_2_HR	180	0.912703	20.3699
BERNOULLI	Urban100	img_072_SRF_2_HR	190	0.894129	19.5216
BERNOULLI	Urban100	img_072_SRF_2_HR	200	0.865916	18.453
BERNOULLI	Urban100	img_072_SRF_2_HR	210	0.829542	17.2761
BERNOULLI	Urban100	img_072_SRF_2_HR	220	0.776287	16.1696
BERNOULLI	Urban100	img_072_SRF_2_HR	230	0.686481	14.6279
BERNOULLI	Urban100	img_072_SRF_2_HR	240	0.538042	12.9131
BERNOULLI	Urban100	img_071_SRF_2_HR	150	0.912574	32.7026
BERNOULLI	Urban100	img_071_SRF_2_HR	160	0.901265	32.0098
BERNOULLI	Urban100	img_071_SRF_2_HR	170	0.88613	31.4629
BERNOULLI	Urban100	img_071_SRF_2_HR	180	0.871092	30.7024
BERNOULLI	Urban100	img_071_SRF_2_HR	190	0.850413	30.0653
BERNOULLI	Urban100	img_071_SRF_2_HR	200	0.827857	29.33
BERNOULLI	Urban100	img_071_SRF_2_HR	210	0.794796	28.2976
BERNOULLI	Urban100	img_071_SRF_2_HR	220	0.747903	27.2844
BERNOULLI	Urban100	img_071_SRF_2_HR	230	0.687697	26.223
BERNOULLI	Urban100	img_071_SRF_2_HR	240	0.600259	24.7234
BERNOULLI	Urban100	img_023_SRF_2_HR	150	0.746604	7.64066
BERNOULLI	Urban100	img_023_SRF_2_HR	160	0.743213	7.71047
BERNOULLI	Urban100	img_023_SRF_2_HR	170	0.738818	7.80602
BERNOULLI	Urban100	img_023_SRF_2_HR	180	0.73309	7.9897
BERNOULLI	Urban100	img_023_SRF_2_HR	190	0.724248	8.22463
BERNOULLI	Urban100	img_023_SRF_2_HR	200	0.713642	8.50743
BERNOULLI	Urban100	img_023_SRF_2_HR	210	0.696817	8.71155
BERNOULLI	Urban100	img_023_SRF_2_HR	220	0.669995	8.76237
BERNOULLI	Urban100	img_023_SRF_2_HR	230	0.61562	8.97851
BERNOULLI	Urban100	img_023_SRF_2_HR	240	0.497251	9.44436
BERNOULLI	Urban100	img_051_SRF_2_HR	150	0.95097	29.6323
BERNOULLI	Urban100	img_051_SRF_2_HR	160	0.943411	29.0183
BERNOULLI	Urban100	img_051_SRF_2_HR	170	0.932387	28.154
BERNOULLI	Urban100	img_051_SRF_2_HR	180	0.920718	27.4608
BERNOULLI	Urban100	img_051_SRF_2_HR	190	0.90493	26.7003
BERNOULLI	Urban100	img_051_SRF_2_HR	200	0.88716	25.9571
BERNOULLI	Urban100	img_051_SRF_2_HR	210	0.86309	25.0804
BERNOULLI	Urban100	img_051_SRF_2_HR	220	0.825803	24.1105
BERNOULLI	Urban100	img_051_SRF_2_HR	230	0.777984	22.9805
BERNOULLI	Urban100	img_051_SRF_2_HR	240	0.675466	21.3738
BERNOULLI	Urban100	img_001_SRF_2_HR	150	0.934663	31.4686
BERNOULLI	Urban100	img_001_SRF_2_HR	160	0.927161	30.8911
BERNOULLI	Urban100	img_001_SRF_2_HR	170	0.915235	29.8941
BERNOULLI	Urban100	img_001_SRF_2_HR	180	0.902511	29.1854
BERNOULLI	Urban100	img_001_SRF_2_HR	190	0.886212	28.5074
BERNOULLI	Urban100	img_001_SRF_2_HR	200	0.870683	27.5636
BERNOULLI	Urban100	img_001_SRF_2_HR	210	0.845008	26.4523
BERNOULLI	Urban100	img_001_SRF_2_HR	220	0.813139	25.4946
BERNOULLI	Urban100	img_001_SRF_2_HR	230	0.764829	24.0925
BERNOULLI	Urban100	img_001_SRF_2_HR	240	0.683526	22.4479
BERNOULLI	Urban100	img_004_SRF_2_HR	150	0.924037	24.1923
BERNOULLI	Urban100	img_004_SRF_2_HR	160	0.909144	23.3024
BERNOULLI	Urban100	img_004_SRF_2_HR	170	0.892712	22.5595
BERNOULLI	Urban100	img_004_SRF_2_HR	180	0.869456	21.6698
BERNOULLI	Urban100	img_004_SRF_2_HR	190	0.843516	20.7812
BERNOULLI	Urban100	img_004_SRF_2_HR	200	0.814403	20.0405
BERNOULLI	Urban100	img_004_SRF_2_HR	210	0.775396	19.2944
BERNOULLI	Urban100	img_004_SRF_2_HR	220	0.716242	18.2853
BERNOULLI	Urban100	img_004_SRF_2_HR	230	0.640102	17.4078
BERNOULLI	Urban100	img_004_SRF_2_HR	240	0.510953	16.341
BERNOULLI	Urban100	img_086_SRF_2_HR	150	0.963838	33.064
BERNOULLI	Urban100	img_086_SRF_2_HR	160	0.957917	32.1742
BERNOULLI	Urban100	img_086_SRF_2_HR	170	0.953235	31.7249
BERNOULLI	Urban100	img_086_SRF_2_HR	180	0.944894	31.0283
BERNOULLI	Urban100	img_086_SRF_2_HR	190	0.935809	30.2144
BERNOULLI	Urban100	img_086_SRF_2_HR	200	0.924686	29.2848
BERNOULLI	Urban100	img_086_SRF_2_HR	210	0.906903	28.1174
BERNOULLI	Urban100	img_086_SRF_2_HR	220	0.886838	27.2006
BERNOULLI	Urban100	img_086_SRF_2_HR	230	0.856212	25.8378
BERNOULLI	Urban100	img_086_SRF_2_HR	240	0.810292	24.1733
BERNOULLI	Urban100	img_090_SRF_2_HR	150	0.985328	37.1085
BERNOULLI	Urban100	img_090_SRF_2_HR	160	0.98115	35.7746
BERNOULLI	Urban100	img_090_SRF_2_HR	170	0.978546	35.2936
BERNOULLI	Urban100	img_090_SRF_2_HR	180	0.974559	34.5615
BERNOULLI	Urban100	img_090_SRF_2_HR	190	0.967776	33.4697
BERNOULLI	Urban100	img_090_SRF_2_HR	200	0.959622	32.5615
BERNOULLI	Urban100	img_090_SRF_2_HR	210	0.943875	30.9537
BERNOULLI	Urban100	img_090_SRF_2_HR	220	0.927691	30.1459
BERNOULLI	Urban100	img_090_SRF_2_HR	230	0.891178	28.3609
BERNOULLI	Urban100	img_090_SRF_2_HR	240	0.814517	26.2353
BERNOULLI	Urban100	img_005_SRF_2_HR	150	0.970964	28.8798
BERNOULLI	Urban100	img_005_SRF_2_HR	160	0.96684	28.0052
BERNOULLI	Urban100	img_005_SRF_2_HR	170	0.961288	27.2248
BERNOULLI	Urban100	img_005_SRF_2_HR	180	0.953156	26.1825
BERNOULLI	Urban100	img_005_SRF_2_HR	190	0.942762	25.1913
BERNOULLI	Urban100	img_005_SRF_2_HR	200	0.931024	24.3121
BERNOULLI	Urban100	img_005_SRF_2_HR	210	0.912662	23.2547
BERNOULLI	Urban100	img_005_SRF_2_HR	220	0.889358	22.0395
BERNOULLI	Urban100	img_005_SRF_2_HR	230	0.846725	20.4993
BERNOULLI	Urban100	img_005_SRF_2_HR	240	0.770755	18.7755
BERNOULLI	Urban100	img_040_SRF_2_HR	150	0.988305	30.3736
BERNOULLI	Urban100	img_040_SRF_2_HR	160	0.986219	29.5556
BERNOULLI	Urban100	img_040_SRF_2_HR	170	0.983059	28.524
BERNOULLI	Urban100	img_040_SRF_2_HR	180	0.979293	27.6627
BERNOULLI	Urban100	img_040_SRF_2_HR	190	0.972166	26.3204
BERNOULLI	Urban100	img_040_SRF_2_HR	200	0.966063	25.3057
BERNOULLI	Urban100	img_040_SRF_2_HR	210	0.94917	23.4443
BERNOULLI	Urban100	img_040_SRF_2_HR	220	0.928967	22.0312
BERNOULLI	Urban100	img_040_SRF_2_HR	230	0.872316	19.2335
BERNOULLI	Urban100	img_040_SRF_2_HR	240	0.773174	16.6395
BERNOULLI	Urban100	img_002_SRF_2_HR	150	0.957372	30.0333
BERNOULLI	Urban100	img_002_SRF_2_HR	160	0.949561	29.2912
BERNOULLI	Urban100	img_002_SRF_2_HR	170	0.941043	28.6203
BERNOULLI	Urban100	img_002_SRF_2_HR	180	0.929815	27.8293
BERNOULLI	Urban100	img_002_SRF_2_HR	190	0.917366	27.0651
BERNOULLI	Urban100	img_002_SRF_2_HR	200	0.897197	26.1758
BERNOULLI	Urban100	img_002_SRF_2_HR	210	0.871028	25.2064
BERNOULLI	Urban100	img_002_SRF_2_HR	220	0.836639	24.1694
BERNOULLI	Urban100	img_002_SRF_2_HR	230	0.781778	22.8402
BERNOULLI	Urban100	img_002_SRF_2_HR	240	0.68293	21.0619
BERNOULLI	Urban100	img_083_SRF_2_HR	150	0.92643	26.9894
BERNOULLI	Urban100	img_083_SRF_2_HR	160	0.917071	26.4645
BERNOULLI	Urban100	img_083_SRF_2_HR	170	0.905721	25.7787
BERNOULLI	Urban100	img_083_SRF_2_HR	180	0.890728	25.1908
BERNOULLI	Urban100	img_083_SRF_2_HR	190	0.868237	24.3048
BERNOULLI	Urban100	img_083_SRF_2_HR	200	0.844242	23.4058
BERNOULLI	Urban100	img_083_SRF_2_HR	210	0.808506	22.5399
BERNOULLI	Urban100	img_083_SRF_2_HR	220	0.761147	21.4664
BERNOULLI	Urban100	img_083_SRF_2_HR	230	0.68992	20.3334
BERNOULLI	Urban100	img_083_SRF_2_HR	240	0.571064	18.7362
BERNOULLI	Urban100	img_008_SRF_2_HR	150	0.904803	25.1413
BERNOULLI	Urban100	img_008_SRF_2_HR	160	0.889309	24.4581
BERNOULLI	Urban100	img_008_SRF_2_HR	170	0.870334	23.7899
BERNOULLI	Urban100	img_008_SRF_2_HR	180	0.850077	23.2084
BERNOULLI	Urban100	img_008_SRF_2_HR	190	0.824179	22.4575
BERNOULLI	Urban100	img_008_SRF_2_HR	200	0.789807	21.7631
BERNOULLI	Urban100	img_008_SRF_2_HR	210	0.745112	20.9435
BERNOULLI	Urban100	img_008_SRF_2_HR	220	0.682428	20.0664
BERNOULLI	Urban100	img_008_SRF_2_HR	230	0.60199	19.1198
BERNOULLI	Urban100	img_008_SRF_2_HR	240	0.467923	17.8258
BERNOULLI	Urban100	img_032_SRF_2_HR	150	0.953144	32.8987
BERNOULLI	Urban100	img_032_SRF_2_HR	160	0.943988	32.1475
BERNOULLI	Urban100	img_032_SRF_2_HR	170	0.935759	31.5936
BERNOULLI	Urban100	img_032_SRF_2_HR	180	0.923074	30.5614
BERNOULLI	Urban100	img_032_SRF_2_HR	190	0.911093	29.936
BERNOULLI	Urban100	img_032_SRF_2_HR	200	0.890213	28.9792
BERNOULLI	Urban100	img_032_SRF_2_HR	210	0.866239	28.2299
BERNOULLI	Urban100	img_032_SRF_2_HR	220	0.827906	26.9499
BERNOULLI	Urban100	img_032_SRF_2_HR	230	0.783024	25.7055
BERNOULLI	Urban100	img_032_SRF_2_HR	240	0.711371	24.0925
BERNOULLI	Urban100	img_028_SRF_2_HR	150	0.970992	33.8902
BERNOULLI	Urban100	img_028_SRF_2_HR	160	0.96768	33.9509
BERNOULLI	Urban100	img_028_SRF_2_HR	170	0.961405	32.9239
BERNOULLI	Urban100	img_028_SRF_2_HR	180	0.956772	32.4206
BERNOULLI	Urban100	img_028_SRF_2_HR	190	0.948265	31.3449
BERNOULLI	Urban100	img_028_SRF_2_HR	200	0.937047	30.4712
BERNOULLI	Urban100	img_028_SRF_2_HR	210	0.922611	29.2673
BERNOULLI	Urban100	img_028_SRF_2_HR	220	0.899708	28.4232
BERNOULLI	Urban100	img_028_SRF_2_HR	230	0.868196	26.8928
BERNOULLI	Urban100	img_028_SRF_2_HR	240	0.806241	25.0098
BERNOULLI	Urban100	img_012_SRF_2_HR	150	0.92651	28.2933
BERNOULLI	Urban100	img_012_SRF_2_HR	160	0.916021	27.7504
BERNOULLI	Urban100	img_012_SRF_2_HR	170	0.903752	27.1168
BERNOULLI	Urban100	img_012_SRF_2_HR	180	0.886881	26.4198
BERNOULLI	Urban100	img_012_SRF_2_HR	190	0.869377	25.7242
BERNOULLI	Urban100	img_012_SRF_2_HR	200	0.845647	25.0611
BERNOULLI	Urban100	img_012_SRF_2_HR	210	0.816841	24.3305
BERNOULLI	Urban100	img_012_SRF_2_HR	220	0.773003	23.3748
BERNOULLI	Urban100	img_012_SRF_2_HR	230	0.720408	22.4746
BERNOULLI	Urban100	img_012_SRF_2_HR	240	0.613725	20.9845
BERNOULLI	Urban100	img_061_SRF_2_HR	150	0.922045	27.9874
BERNOULLI	Urban100	img_061_SRF_2_HR	160	0.909653	27.3392
BERNOULLI	Urban100	img_061_SRF_2_HR	170	0.895223	26.7198
BERNOULLI	Urban100	img_061_SRF_2_HR	180	0.878126	26.0559
BERNOULLI	Urban100	img_061_SRF_2_HR	190	0.859209	25.425
BERNOULLI	Urban100	img_061_SRF_2_HR	200	0.830476	24.581
BERNOULLI	Urban100	img_061_SRF_2_HR	210	0.801048	23.8426
BERNOULLI	Urban100	img_061_SRF_2_HR	220	0.754006	22.912
BERNOULLI	Urban100	img_061_SRF_2_HR	230	0.691465	21.8238
BERNOULLI	Urban100	img_061_SRF_2_HR	240	0.592818	20.4534
BERNOULLI	Urban100	img_009_SRF_2_HR	150	0.980729	38.072
BERNOULLI	Urban100	img_009_SRF_2_HR	160	0.978209	37.6111
BERNOULLI	Urban100	img_009_SRF_2_HR	170	0.974875	36.6942
BERNOULLI	Urban100	img_009_SRF_2_HR	180	0.970857	36.253
BERNOULLI	Urban100	img_009_SRF_2_HR	190	0.963193	34.9857
BERNOULLI	Urban100	img_009_SRF_2_HR	200	0.955229	34.1655
BERNOULLI	Urban100	img_009_SRF_2_HR	210	0.943983	32.9655
BERNOULLI	Urban100	img_009_SRF_2_HR	220	0.929305	31.8861
BERNOULLI	Urban100	img_009_SRF_2_HR	230	0.895771	30.5715
BERNOULLI	Urban100	img_009_SRF_2_HR	240	0.843573	28.5929
BERNOULLI	Urban100	img_026_SRF_2_HR	150	0.963963	35.3543
BERNOULLI	Urban100	img_026_SRF_2_HR	160	0.958564	34.5922
BERNOULLI	Urban100	img_026_SRF_2_HR	170	0.952509	33.9957
BERNOULLI	Urban100	img_026_SRF_2_HR	180	0.94572	32.9969
BERNOULLI	Urban100	img_026_SRF_2_HR	190	0.93493	31.9685
BERNOULLI	Urban100	img_026_SRF_2_HR	200	0.921145	31.0959
BERNOULLI	Urban100	img_026_SRF_2_HR	210	0.903521	29.7169
BERNOULLI	Urban100	img_026_SRF_2_HR	220	0.880102	28.5394
BERNOULLI	Urban100	img_026_SRF_2_HR	230	0.833984	26.7564
BERNOULLI	Urban100	img_026_SRF_2_HR	240	0.762086	24.5863
BERNOULLI	Urban100	img_080_SRF_2_HR	150	0.981257	38.4587
BERNOULLI	Urban100	img_080_SRF_2_HR	160	0.978271	37.6083
BERNOULLI	Urban100	img_080_SRF_2_HR	170	0.974265	36.7914
BERNOULLI	Urban100	img_080_SRF_2_HR	180	0.970391	36.2981
BERNOULLI	Urban100	img_080_SRF_2_HR	190	0.963908	35.2489
BERNOULLI	Urban100	img_080_SRF_2_HR	200	0.954775	34.0638
BERNOULLI	Urban100	img_080_SRF_2_HR	210	0.943766	33.0994
BERNOULLI	Urban100	img_080_SRF_2_HR	220	0.931499	32.1715
BERNOULLI	Urban100	img_080_SRF_2_HR	230	0.906612	30.6295
BERNOULLI	Urban100	img_080_SRF_2_HR	240	0.860301	28.851
BERNOULLI	Urban100	img_025_SRF_2_HR	150	0.977779	35.5354
BERNOULLI	Urban100	img_025_SRF_2_HR	160	0.974528	34.811
BERNOULLI	Urban100	img_025_SRF_2_HR	170	0.970255	33.9238
BERNOULLI	Urban100	img_025_SRF_2_HR	180	0.964572	32.8271
BERNOULLI	Urban100	img_025_SRF_2_HR	190	0.95898	32.0738
BERNOULLI	Urban100	img_025_SRF_2_HR	200	0.949772	30.7075
BERNOULLI	Urban100	img_025_SRF_2_HR	210	0.939444	29.6674
BERNOULLI	Urban100	img_025_SRF_2_HR	220	0.91964	27.8785
BERNOULLI	Urban100	img_025_SRF_2_HR	230	0.890004	25.8863
BERNOULLI	Urban100	img_025_SRF_2_HR	240	0.823958	23.1536
BERNOULLI	Urban100	img_094_SRF_2_HR	150	0.94387	31.7325
BERNOULLI	Urban100	img_094_SRF_2_HR	160	0.936912	31.2025
BERNOULLI	Urban100	img_094_SRF_2_HR	170	0.926662	30.3735
BERNOULLI	Urban100	img_094_SRF_2_HR	180	0.915084	29.6805
BERNOULLI	Urban100	img_094_SRF_2_HR	190	0.899853	28.5629
BERNOULLI	Urban100	img_094_SRF_2_HR	200	0.884157	28.1462
BERNOULLI	Urban100	img_094_SRF_2_HR	210	0.861357	27.0606
BERNOULLI	Urban100	img_094_SRF_2_HR	220	0.831161	26.1715
BERNOULLI	Urban100	img_094_SRF_2_HR	230	0.78526	25.131
BERNOULLI	Urban100	img_094_SRF_2_HR	240	0.708268	23.3857
BERNOULLI	Urban100	img_030_SRF_2_HR	150	0.948196	27.4137
BERNOULLI	Urban100	img_030_SRF_2_HR	160	0.93727	26.5684
BERNOULLI	Urban100	img_030_SRF_2_HR	170	0.926835	25.8267
BERNOULLI	Urban100	img_030_SRF_2_HR	180	0.915502	25.2219
BERNOULLI	Urban100	img_030_SRF_2_HR	190	0.895551	24.278
BERNOULLI	Urban100	img_030_SRF_2_HR	200	0.869752	23.2768
BERNOULLI	Urban100	img_030_SRF_2_HR	210	0.836659	22.1549
BERNOULLI	Urban100	img_030_SRF_2_HR	220	0.782044	20.8414
BERNOULLI	Urban100	img_030_SRF_2_HR	230	0.719825	19.7456
BERNOULLI	Urban100	img_030_SRF_2_HR	240	0.588858	17.8576
BERNOULLI	Urban100	img_048_SRF_2_HR	150	0.917376	22.6359
BERNOULLI	Urban100	img_048_SRF_2_HR	160	0.902742	21.9768
BERNOULLI	Urban100	img_048_SRF_2_HR	170	0.888782	21.3747
BERNOULLI	Urban100	img_048_SRF_2_HR	180	0.871276	20.7421
BERNOULLI	Urban100	img_048_SRF_2_HR	190	0.854951	20.2976
BERNOULLI	Urban100	img_048_SRF_2_HR	200	0.83277	19.7001
BERNOULLI	Urban100	img_048_SRF_2_HR	210	0.795669	18.841
BERNOULLI	Urban100	img_048_SRF_2_HR	220	0.749571	17.9347
BERNOULLI	Urban100	img_048_SRF_2_HR	230	0.694149	17.154
BERNOULLI	Urban100	img_048_SRF_2_HR	240	0.618461	16.2218
BERNOULLI	Urban100	img_037_SRF_2_HR	150	0.924145	27.0656
BERNOULLI	Urban100	img_037_SRF_2_HR	160	0.911882	26.4381
BERNOULLI	Urban100	img_037_SRF_2_HR	170	0.898346	25.6753
BERNOULLI	Urban100	img_037_SRF_2_HR	180	0.879406	24.8915
BERNOULLI	Urban100	img_037_SRF_2_HR	190	0.858699	24.1485
BERNOULLI	Urban100	img_037_SRF_2_HR	200	0.832172	23.3032
BERNOULLI	Urban100	img_037_SRF_2_HR	210	0.802081	22.5502
BERNOULLI	Urban100	img_037_SRF_2_HR	220	0.757546	21.7042
BERNOULLI	Urban100	img_037_SRF_2_HR	230	0.686963	20.4648
BERNOULLI	Urban100	img_037_SRF_2_HR	240	0.58642	19.0135
BERNOULLI	Urban100	img_057_SRF_2_HR	150	0.954514	31.0835
BERNOULLI	Urban100	img_057_SRF_2_HR	160	0.944973	30.16
BERNOULLI	Urban100	img_057_SRF_2_HR	170	0.934405	29.234
BERNOULLI	Urban100	img_057_SRF_2_HR	180	0.923144	28.4475
BERNOULLI	Urban100	img_057_SRF_2_HR	190	0.908272	27.5598
BERNOULLI	Urban100	img_057_SRF_2_HR	200	0.885657	26.4416
BERNOULLI	Urban100	img_057_SRF_2_HR	210	0.85989	25.2804
BERNOULLI	Urban100	img_057_SRF_2_HR	220	0.823382	23.8825
BERNOULLI	Urban100	img_057_SRF_2_HR	230	0.775232	22.4376
BERNOULLI	Urban100	img_057_SRF_2_HR	240	0.686984	20.0936
BERNOULLI	Urban100	img_093_SRF_2_HR	150	0.965361	30.3332
BERNOULLI	Urban100	img_093_SRF_2_HR	160	0.960965	29.4275
BERNOULLI	Urban100	img_093_SRF_2_HR	170	0.954491	28.7751
BERNOULLI	Urban100	img_093_SRF_2_HR	180	0.948072	27.9519
BERNOULLI	Urban100	img_093_SRF_2_HR	190	0.936191	26.762
BERNOULLI	Urban100	img_093_SRF_2_HR	200	0.923994	25.8056
BERNOULLI	Urban100	img_093_SRF_2_HR	210	0.903263	24.5213
BERNOULLI	Urban100	img_093_SRF_2_HR	220	0.866123	22.6619
BERNOULLI	Urban100	img_093_SRF_2_HR	230	0.810295	20.7748
BERNOULLI	Urban100	img_093_SRF_2_HR	240	0.706763	18.5673
BERNOULLI	Urban100	img_003_SRF_2_HR	150	0.907203	27.9552
BERNOULLI	Urban100	img_003_SRF_2_HR	160	0.894805	27.3706
BERNOULLI	Urban100	img_003_SRF_2_HR	170	0.875667	26.5681
BERNOULLI	Urban100	img_003_SRF_2_HR	180	0.861077	26.0821
BERNOULLI	Urban100	img_003_SRF_2_HR	190	0.837406	25.3771
BERNOULLI	Urban100	img_003_SRF_2_HR	200	0.81011	24.5936
BERNOULLI	Urban100	img_003_SRF_2_HR	210	0.773823	23.6434
BERNOULLI	Urban100	img_003_SRF_2_HR	220	0.733125	22.8214
BERNOULLI	Urban100	img_003_SRF_2_HR	230	0.664825	21.5946
BERNOULLI	Urban100	img_003_SRF_2_HR	240	0.558412	20.1825
BERNOULLI	Urban100	img_021_SRF_2_HR	150	0.932424	33.124
BERNOULLI	Urban100	img_021_SRF_2_HR	160	0.923916	32.3929
BERNOULLI	Urban100	img_021_SRF_2_HR	170	0.914147	31.5839
BERNOULLI	Urban100	img_021_SRF_2_HR	180	0.904159	30.9685
BERNOULLI	Urban100	img_021_SRF_2_HR	190	0.892226	30.2191
BERNOULLI	Urban100	img_021_SRF_2_HR	200	0.873814	28.9975
BERNOULLI	Urban100	img_021_SRF_2_HR	210	0.855352	28.1196
BERNOULLI	Urban100	img_021_SRF_2_HR	220	0.826335	27.0285
BERNOULLI	Urban100	img_021_SRF_2_HR	230	0.78244	25.5761
BERNOULLI	Urban100	img_021_SRF_2_HR	240	0.720689	23.9991
BERNOULLI	Urban100	img_064_SRF_2_HR	150	0.953124	30.6899
BERNOULLI	Urban100	img_064_SRF_2_HR	160	0.945931	30.051
BERNOULLI	Urban100	img_064_SRF_2_HR	170	0.935371	29.1583
BERNOULLI	Urban100	img_064_SRF_2_HR	180	0.923652	28.3663
BERNOULLI	Urban100	img_064_SRF_2_HR	190	0.910953	27.6752
BERNOULLI	Urban100	img_064_SRF_2_HR	200	0.887225	26.5674
BERNOULLI	Urban100	img_064_SRF_2_HR	210	0.859369	25.4385
BERNOULLI	Urban100	img_064_SRF_2_HR	220	0.824994	24.5271
BERNOULLI	Urban100	img_064_SRF_2_HR	230	0.770469	23.2562
BERNOULLI	Urban100	img_064_SRF_2_HR	240	0.679073	21.4791
BERNOULLI	Urban100	img_091_SRF_2_HR	150	0.897935	26.7983
BERNOULLI	Urban100	img_091_SRF_2_HR	160	0.883381	26.1392
BERNOULLI	Urban100	img_091_SRF_2_HR	170	0.863609	25.5078
BERNOULLI	Urban100	img_091_SRF_2_HR	180	0.842836	24.8108
BERNOULLI	Urban100	img_091_SRF_2_HR	190	0.814132	24.1127
BERNOULLI	Urban100	img_091_SRF_2_HR	200	0.78457	23.4145
BERNOULLI	Urban100	img_091_SRF_2_HR	210	0.737917	22.5105
BERNOULLI	Urban100	img_091_SRF_2_HR	220	0.684636	21.6569
BERNOULLI	Urban100	img_091_SRF_2_HR	230	0.610378	20.7526
BERNOULLI	Urban100	img_091_SRF_2_HR	240	0.492352	19.4297
BERNOULLI	Urban100	img_011_SRF_2_HR	150	0.94874	25.4419
BERNOULLI	Urban100	img_011_SRF_2_HR	160	0.943549	24.7196
BERNOULLI	Urban100	img_011_SRF_2_HR	170	0.935993	23.9786
BERNOULLI	Urban100	img_011_SRF_2_HR	180	0.926891	23.1076
BERNOULLI	Urban100	img_011_SRF_2_HR	190	0.913371	22.0252
BERNOULLI	Urban100	img_011_SRF_2_HR	200	0.895259	20.8569
BERNOULLI	Urban100	img_011_SRF_2_HR	210	0.870179	19.6775
BERNOULLI	Urban100	img_011_SRF_2_HR	220	0.825107	18.1278
BERNOULLI	Urban100	img_011_SRF_2_HR	230	0.758863	16.3022
BERNOULLI	Urban100	img_011_SRF_2_HR	240	0.650244	14.4069
BERNOULLI	Urban100	img_031_SRF_2_HR	150	0.873599	21.787
BERNOULLI	Urban100	img_031_SRF_2_HR	160	0.861747	21.2082
BERNOULLI	Urban100	img_031_SRF_2_HR	170	0.849115	20.252
BERNOULLI	Urban100	img_031_SRF_2_HR	180	0.832753	20.2847
BERNOULLI	Urban100	img_031_SRF_2_HR	190	0.816016	20.7231
BERNOULLI	Urban100	img_031_SRF_2_HR	200	0.792947	20.1712
BERNOULLI	Urban100	img_031_SRF_2_HR	210	0.759633	20.2898
BERNOULLI	Urban100	img_031_SRF_2_HR	220	0.715538	18.8053
BERNOULLI	Urban100	img_031_SRF_2_HR	230	0.665339	19.418
BERNOULLI	Urban100	img_031_SRF_2_HR	240	0.564238	18.2857
BERNOULLI	Urban100	img_035_SRF_2_HR	150	0.969834	31.8286
BERNOULLI	Urban100	img_035_SRF_2_HR	160	0.96508	30.9996
BERNOULLI	Urban100	img_035_SRF_2_HR	170	0.958154	30.179
BERNOULLI	Urban100	img_035_SRF_2_HR	180	0.94895	29.2702
BERNOULLI	Urban100	img_035_SRF_2_HR	190	0.936984	28.1592
BERNOULLI	Urban100	img_035_SRF_2_HR	200	0.923533	27.2662
BERNOULLI	Urban100	img_035_SRF_2_HR	210	0.900984	25.9776
BERNOULLI	Urban100	img_035_SRF_2_HR	220	0.871108	24.6263
BERNOULLI	Urban100	img_035_SRF_2_HR	230	0.824315	23.098
BERNOULLI	Urban100	img_035_SRF_2_HR	240	0.726716	20.6925
BERNOULLI	Urban100	img_098_SRF_2_HR	150	0.855668	25.7162
BERNOULLI	Urban100	img_098_SRF_2_HR	160	0.837109	25.1671
BERNOULLI	Urban100	img_098_SRF_2_HR	170	0.816524	24.6689
BERNOULLI	Urban100	img_098_SRF_2_HR	180	0.791019	24.0483
BERNOULLI	Urban100	img_098_SRF_2_HR	190	0.765128	23.4347
BERNOULLI	Urban100	img_098_SRF_2_HR	200	0.729468	22.8195
BERNOULLI	Urban100	img_098_SRF_2_HR	210	0.683909	22.0872
BERNOULLI	Urban100	img_098_SRF_2_HR	220	0.629889	21.349
BERNOULLI	Urban100	img_098_SRF_2_HR	230	0.55395	20.3741
BERNOULLI	Urban100	img_098_SRF_2_HR	240	0.452468	19.4549
BERNOULLI	Urban100	img_046_SRF_2_HR	150	0.933806	29.7243
BERNOULLI	Urban100	img_046_SRF_2_HR	160	0.925514	29.214
BERNOULLI	Urban100	img_046_SRF_2_HR	170	0.915629	28.6143
BERNOULLI	Urban100	img_046_SRF_2_HR	180	0.902621	27.8818
BERNOULLI	Urban100	img_046_SRF_2_HR	190	0.88642	27.3026
BERNOULLI	Urban100	img_046_SRF_2_HR	200	0.868185	26.7191
BERNOULLI	Urban100	img_046_SRF_2_HR	210	0.841975	25.8601
BERNOULLI	Urban100	img_046_SRF_2_HR	220	0.817096	25.171
BERNOULLI	Urban100	img_046_SRF_2_HR	230	0.767289	24.2121
BERNOULLI	Urban100	img_046_SRF_2_HR	240	0.705325	22.9358
BERNOULLI	Urban100	img_092_SRF_2_HR	150	0.905641	24.408
BERNOULLI	Urban100	img_092_SRF_2_HR	160	0.897363	24.0355
BERNOULLI	Urban100	img_092_SRF_2_HR	170	0.878123	23.1986
BERNOULLI	Urban100	img_092_SRF_2_HR	180	0.853092	22.3379
BERNOULLI	Urban100	img_092_SRF_2_HR	190	0.830894	21.6055
BERNOULLI	Urban100	img_092_SRF_2_HR	200	0.798388	20.8072
BERNOULLI	Urban100	img_092_SRF_2_HR	210	0.746706	19.7315
BERNOULLI	Urban100	img_092_SRF_2_HR	220	0.699122	18.9166
BERNOULLI	Urban100	img_092_SRF_2_HR	230	0.620495	17.8159
BERNOULLI	Urban100	img_092_SRF_2_HR	240	0.530176	16.8654
BERNOULLI	Urban100	img_055_SRF_2_HR	150	0.981984	35.8183
BERNOULLI	Urban100	img_055_SRF_2_HR	160	0.977622	34.8755
BERNOULLI	Urban100	img_055_SRF_2_HR	170	0.973437	33.8154
BERNOULLI	Urban100	img_055_SRF_2_HR	180	0.967987	32.8069
BERNOULLI	Urban100	img_055_SRF_2_HR	190	0.95797	31.1846
BERNOULLI	Urban100	img_055_SRF_2_HR	200	0.9496	30.101
BERNOULLI	Urban100	img_055_SRF_2_HR	210	0.932353	28.4789
BERNOULLI	Urban100	img_055_SRF_2_HR	220	0.898782	26.3306
BERNOULLI	Urban100	img_055_SRF_2_HR	230	0.858198	24.6681
BERNOULLI	Urban100	img_055_SRF_2_HR	240	0.749665	21.7506
BERNOULLI	Urban100	img_075_SRF_2_HR	150	0.967546	35.0649
BERNOULLI	Urban100	img_075_SRF_2_HR	160	0.963057	34.2175
BERNOULLI	Urban100	img_075_SRF_2_HR	170	0.95677	33.1644
BERNOULLI	Urban100	img_075_SRF_2_HR	180	0.950998	32.4937
BERNOULLI	Urban100	img_075_SRF_2_HR	190	0.942543	31.5831
BERNOULLI	Urban100	img_075_SRF_2_HR	200	0.931155	30.4095
BERNOULLI	Urban100	img_075_SRF_2_HR	210	0.916378	28.9812
BERNOULLI	Urban100	img_075_SRF_2_HR	220	0.89871	27.5708
BERNOULLI	Urban100	img_075_SRF_2_HR	230	0.866042	25.6853
BERNOULLI	Urban100	img_075_SRF_2_HR	240	0.810826	23.6224
BERNOULLI	Urban100	img_036_SRF_2_HR	150	0.965748	31.9726
BERNOULLI	Urban100	img_036_SRF_2_HR	160	0.959558	31.1145
BERNOULLI	Urban100	img_036_SRF_2_HR	170	0.953396	30.5358
BERNOULLI	Urban100	img_036_SRF_2_HR	180	0.944276	29.5551
BERNOULLI	Urban100	img_036_SRF_2_HR	190	0.931323	28.4687
BERNOULLI	Urban100	img_036_SRF_2_HR	200	0.917295	27.5502
BERNOULLI	Urban100	img_036_SRF_2_HR	210	0.894626	26.2122
BERNOULLI	Urban100	img_036_SRF_2_HR	220	0.863969	24.8215
BERNOULLI	Urban100	img_036_SRF_2_HR	230	0.81031	23.069
BERNOULLI	Urban100	img_036_SRF_2_HR	240	0.729461	21.3063
BERNOULLI	Urban100	img_018_SRF_2_HR	150	0.902534	29.3423
BERNOULLI	Urban100	img_018_SRF_2_HR	160	0.887219	28.6396
BERNOULLI	Urban100	img_018_SRF_2_HR	170	0.871365	27.9617
BERNOULLI	Urban100	img_018_SRF_2_HR	180	0.854969	27.3576
BERNOULLI	Urban100	img_018_SRF_2_HR	190	0.833702	26.6924
BERNOULLI	Urban100	img_018_SRF_2_HR	200	0.804643	25.8915
BERNOULLI	Urban100	img_018_SRF_2_HR	210	0.768604	24.9941
BERNOULLI	Urban100	img_018_SRF_2_HR	220	0.715804	24.1619
BERNOULLI	Urban100	img_018_SRF_2_HR	230	0.647209	22.9081
BERNOULLI	Urban100	img_018_SRF_2_HR	240	0.552659	21.4558
BERNOULLI	Urban100	img_014_SRF_2_HR	150	0.928001	28.4736
BERNOULLI	Urban100	img_014_SRF_2_HR	160	0.916347	27.829
BERNOULLI	Urban100	img_014_SRF_2_HR	170	0.904341	27.2585
BERNOULLI	Urban100	img_014_SRF_2_HR	180	0.89161	26.7547
BERNOULLI	Urban100	img_014_SRF_2_HR	190	0.869918	25.9479
BERNOULLI	Urban100	img_014_SRF_2_HR	200	0.850129	25.3357
BERNOULLI	Urban100	img_014_SRF_2_HR	210	0.816027	24.4551
BERNOULLI	Urban100	img_014_SRF_2_HR	220	0.780556	23.5694
BERNOULLI	Urban100	img_014_SRF_2_HR	230	0.724805	22.6178
BERNOULLI	Urban100	img_014_SRF_2_HR	240	0.63608	21.4591
BERNOULLI	Urban100	img_027_SRF_2_HR	150	0.957305	33.4829
BERNOULLI	Urban100	img_027_SRF_2_HR	160	0.951504	32.9864
BERNOULLI	Urban100	img_027_SRF_2_HR	170	0.94486	32.3614
BERNOULLI	Urban100	img_027_SRF_2_HR	180	0.936063	31.7122
BERNOULLI	Urban100	img_027_SRF_2_HR	190	0.924317	30.7818
BERNOULLI	Urban100	img_027_SRF_2_HR	200	0.910946	30.232
BERNOULLI	Urban100	img_027_SRF_2_HR	210	0.890749	29.0503
BERNOULLI	Urban100	img_027_SRF_2_HR	220	0.862515	27.8732
BERNOULLI	Urban100	img_027_SRF_2_HR	230	0.827517	26.828
BERNOULLI	Urban100	img_027_SRF_2_HR	240	0.757539	24.9975
BERNOULLI	Urban100	img_042_SRF_2_HR	150	0.972097	31.3332
BERNOULLI	Urban100	img_042_SRF_2_HR	160	0.967579	30.4637
BERNOULLI	Urban100	img_042_SRF_2_HR	170	0.961043	29.6564
BERNOULLI	Urban100	img_042_SRF_2_HR	180	0.953604	28.8
BERNOULLI	Urban100	img_042_SRF_2_HR	190	0.943779	27.8673
BERNOULLI	Urban100	img_042_SRF_2_HR	200	0.929577	26.6439
BERNOULLI	Urban100	img_042_SRF_2_HR	210	0.911196	25.5354
BERNOULLI	Urban100	img_042_SRF_2_HR	220	0.877914	24.1183
BERNOULLI	Urban100	img_042_SRF_2_HR	230	0.821931	22.2493
[truncated: 4,937 more rows]
