# Supplementary material for: MPDenoiseNet: Resource-Efficient Deep Learning Approach for Image Denoising
Source: Research Square preprint supplement (doi:10.21203/rs.3.rs-6641644/v1), 2025-05-20
Supplement: Supplementary file 5 [file ablation_no_seconv.xlsx]

## Sheet: Sheet1
noise_type	dataset	im_index	noise_parameter	SSIM	PSNR
BERNOULLI	Kodak24	kodim24	150	0.91495	27.7175
BERNOULLI	Kodak24	kodim24	160	0.901803	27.2113
BERNOULLI	Kodak24	kodim24	170	0.887159	26.6666
BERNOULLI	Kodak24	kodim24	180	0.869288	26.1136
BERNOULLI	Kodak24	kodim24	190	0.847985	25.5457
BERNOULLI	Kodak24	kodim24	200	0.822504	24.9003
BERNOULLI	Kodak24	kodim24	210	0.794494	24.3492
BERNOULLI	Kodak24	kodim24	220	0.74961	23.4582
BERNOULLI	Kodak24	kodim24	230	0.703373	22.8147
BERNOULLI	Kodak24	kodim24	240	0.6325	21.9553
BERNOULLI	Kodak24	kodim15	150	0.928773	28.6468
BERNOULLI	Kodak24	kodim15	160	0.921853	29.2196
BERNOULLI	Kodak24	kodim15	170	0.914383	29.751
BERNOULLI	Kodak24	kodim15	180	0.905314	29.9776
BERNOULLI	Kodak24	kodim15	190	0.894564	29.9798
BERNOULLI	Kodak24	kodim15	200	0.880535	29.6552
BERNOULLI	Kodak24	kodim15	210	0.864873	29.3323
BERNOULLI	Kodak24	kodim15	220	0.84603	28.524
BERNOULLI	Kodak24	kodim15	230	0.818734	27.5945
BERNOULLI	Kodak24	kodim15	240	0.785446	26.4952
BERNOULLI	Kodak24	kodim17	150	0.951282	33.6818
BERNOULLI	Kodak24	kodim17	160	0.944003	32.8802
BERNOULLI	Kodak24	kodim17	170	0.936435	32.2444
BERNOULLI	Kodak24	kodim17	180	0.928941	31.9711
BERNOULLI	Kodak24	kodim17	190	0.916519	31.0159
BERNOULLI	Kodak24	kodim17	200	0.904391	30.3691
BERNOULLI	Kodak24	kodim17	210	0.88471	29.5591
BERNOULLI	Kodak24	kodim17	220	0.863238	28.7819
BERNOULLI	Kodak24	kodim17	230	0.832485	27.7905
BERNOULLI	Kodak24	kodim17	240	0.77266	26.2751
BERNOULLI	Kodak24	kodim03	150	0.958696	32.7836
BERNOULLI	Kodak24	kodim03	160	0.952553	32.5205
BERNOULLI	Kodak24	kodim03	170	0.946417	32.2169
BERNOULLI	Kodak24	kodim03	180	0.93769	31.8766
BERNOULLI	Kodak24	kodim03	190	0.928061	31.5211
BERNOULLI	Kodak24	kodim03	200	0.915404	31.1368
BERNOULLI	Kodak24	kodim03	210	0.899199	30.6039
BERNOULLI	Kodak24	kodim03	220	0.883039	30.0154
BERNOULLI	Kodak24	kodim03	230	0.855768	29.3565
BERNOULLI	Kodak24	kodim03	240	0.821786	28.1843
BERNOULLI	Kodak24	kodim06	150	0.908351	28.7664
BERNOULLI	Kodak24	kodim06	160	0.89522	28.3684
BERNOULLI	Kodak24	kodim06	170	0.879257	27.8003
BERNOULLI	Kodak24	kodim06	180	0.861344	27.362
BERNOULLI	Kodak24	kodim06	190	0.839003	26.7688
BERNOULLI	Kodak24	kodim06	200	0.814963	26.2452
BERNOULLI	Kodak24	kodim06	210	0.780531	25.6031
BERNOULLI	Kodak24	kodim06	220	0.73946	24.8525
BERNOULLI	Kodak24	kodim06	230	0.683542	24.0872
BERNOULLI	Kodak24	kodim06	240	0.601744	22.8769
BERNOULLI	Kodak24	kodim02	150	0.918928	31.9311
BERNOULLI	Kodak24	kodim02	160	0.908357	31.6681
BERNOULLI	Kodak24	kodim02	170	0.898819	31.4532
BERNOULLI	Kodak24	kodim02	180	0.885179	31.1512
BERNOULLI	Kodak24	kodim02	190	0.870891	30.856
BERNOULLI	Kodak24	kodim02	200	0.854013	30.4551
BERNOULLI	Kodak24	kodim02	210	0.835308	30.0296
BERNOULLI	Kodak24	kodim02	220	0.81343	29.7147
BERNOULLI	Kodak24	kodim02	230	0.781279	29.0569
BERNOULLI	Kodak24	kodim02	240	0.74109	28.2676
BERNOULLI	Kodak24	kodim14	150	0.908611	29.2468
BERNOULLI	Kodak24	kodim14	160	0.894367	28.7898
BERNOULLI	Kodak24	kodim14	170	0.877855	28.2952
BERNOULLI	Kodak24	kodim14	180	0.859633	27.7492
BERNOULLI	Kodak24	kodim14	190	0.837465	27.1492
BERNOULLI	Kodak24	kodim14	200	0.809912	26.5637
BERNOULLI	Kodak24	kodim14	210	0.779075	25.9689
BERNOULLI	Kodak24	kodim14	220	0.734629	25.062
BERNOULLI	Kodak24	kodim14	230	0.681025	24.2667
BERNOULLI	Kodak24	kodim14	240	0.59997	22.9895
BERNOULLI	Kodak24	kodim07	150	0.970818	32.8058
BERNOULLI	Kodak24	kodim07	160	0.966408	32.3347
BERNOULLI	Kodak24	kodim07	170	0.960949	31.8466
BERNOULLI	Kodak24	kodim07	180	0.955407	31.4504
BERNOULLI	Kodak24	kodim07	190	0.947596	30.8165
BERNOULLI	Kodak24	kodim07	200	0.937813	30.184
BERNOULLI	Kodak24	kodim07	210	0.92369	29.4153
BERNOULLI	Kodak24	kodim07	220	0.905265	28.4987
BERNOULLI	Kodak24	kodim07	230	0.876489	27.2719
BERNOULLI	Kodak24	kodim07	240	0.817549	25.5673
BERNOULLI	Kodak24	kodim20	150	0.93812	30.4724
BERNOULLI	Kodak24	kodim20	160	0.932175	30.5985
BERNOULLI	Kodak24	kodim20	170	0.924786	30.2808
BERNOULLI	Kodak24	kodim20	180	0.917873	30.0271
BERNOULLI	Kodak24	kodim20	190	0.906129	29.215
BERNOULLI	Kodak24	kodim20	200	0.895138	28.8896
BERNOULLI	Kodak24	kodim20	210	0.882501	28.1844
BERNOULLI	Kodak24	kodim20	220	0.865513	27.4303
BERNOULLI	Kodak24	kodim20	230	0.842118	26.3582
BERNOULLI	Kodak24	kodim20	240	0.810139	25.1223
BERNOULLI	Kodak24	kodim11	150	0.917658	29.8922
BERNOULLI	Kodak24	kodim11	160	0.906638	29.4394
BERNOULLI	Kodak24	kodim11	170	0.891424	28.8882
BERNOULLI	Kodak24	kodim11	180	0.876331	28.4057
BERNOULLI	Kodak24	kodim11	190	0.856313	27.8661
BERNOULLI	Kodak24	kodim11	200	0.834111	27.2409
BERNOULLI	Kodak24	kodim11	210	0.804245	26.6071
BERNOULLI	Kodak24	kodim11	220	0.76868	25.9095
BERNOULLI	Kodak24	kodim11	230	0.725262	25.1007
BERNOULLI	Kodak24	kodim11	240	0.657772	23.9391
BERNOULLI	Kodak24	kodim12	150	0.940075	33.0356
BERNOULLI	Kodak24	kodim12	160	0.932824	32.8321
BERNOULLI	Kodak24	kodim12	170	0.923224	32.2858
BERNOULLI	Kodak24	kodim12	180	0.913159	31.98
BERNOULLI	Kodak24	kodim12	190	0.900318	31.4625
BERNOULLI	Kodak24	kodim12	200	0.885641	31.0073
BERNOULLI	Kodak24	kodim12	210	0.867821	30.3274
BERNOULLI	Kodak24	kodim12	220	0.845314	29.3117
BERNOULLI	Kodak24	kodim12	230	0.811992	28.325
BERNOULLI	Kodak24	kodim12	240	0.765149	26.4623
BERNOULLI	Kodak24	kodim09	150	0.948619	32.6216
BERNOULLI	Kodak24	kodim09	160	0.942347	32.24
BERNOULLI	Kodak24	kodim09	170	0.935895	31.6417
BERNOULLI	Kodak24	kodim09	180	0.928481	31.2586
BERNOULLI	Kodak24	kodim09	190	0.918517	30.6635
BERNOULLI	Kodak24	kodim09	200	0.907211	30.0918
BERNOULLI	Kodak24	kodim09	210	0.891524	29.3487
BERNOULLI	Kodak24	kodim09	220	0.874512	28.4953
BERNOULLI	Kodak24	kodim09	230	0.845542	27.4408
BERNOULLI	Kodak24	kodim09	240	0.800054	25.8559
BERNOULLI	Kodak24	kodim01	150	0.876649	27.6631
BERNOULLI	Kodak24	kodim01	160	0.860115	27.2033
BERNOULLI	Kodak24	kodim01	170	0.840327	26.656
BERNOULLI	Kodak24	kodim01	180	0.820769	26.2243
BERNOULLI	Kodak24	kodim01	190	0.795694	25.7058
BERNOULLI	Kodak24	kodim01	200	0.765777	25.1119
BERNOULLI	Kodak24	kodim01	210	0.730465	24.48
BERNOULLI	Kodak24	kodim01	220	0.687715	23.7919
BERNOULLI	Kodak24	kodim01	230	0.625771	22.8477
BERNOULLI	Kodak24	kodim01	240	0.537974	21.7156
BERNOULLI	Kodak24	kodim04	150	0.928509	32.0287
BERNOULLI	Kodak24	kodim04	160	0.919143	31.7415
BERNOULLI	Kodak24	kodim04	170	0.909753	31.4265
BERNOULLI	Kodak24	kodim04	180	0.897348	31.0879
BERNOULLI	Kodak24	kodim04	190	0.882672	30.5683
BERNOULLI	Kodak24	kodim04	200	0.865318	30.1863
BERNOULLI	Kodak24	kodim04	210	0.848565	29.7251
BERNOULLI	Kodak24	kodim04	220	0.822795	29.2182
BERNOULLI	Kodak24	kodim04	230	0.79349	28.374
BERNOULLI	Kodak24	kodim04	240	0.743971	26.9965
BERNOULLI	Kodak24	kodim23	150	0.966508	33.1365
BERNOULLI	Kodak24	kodim23	160	0.963009	32.9296
BERNOULLI	Kodak24	kodim23	170	0.958475	32.5905
BERNOULLI	Kodak24	kodim23	180	0.953719	32.2286
BERNOULLI	Kodak24	kodim23	190	0.94742	31.7563
BERNOULLI	Kodak24	kodim23	200	0.94082	31.3991
BERNOULLI	Kodak24	kodim23	210	0.930728	30.6838
BERNOULLI	Kodak24	kodim23	220	0.919135	30.1829
BERNOULLI	Kodak24	kodim23	230	0.902027	29.0935
BERNOULLI	Kodak24	kodim23	240	0.869405	27.7206
BERNOULLI	Kodak24	kodim22	150	0.909592	30.9172
BERNOULLI	Kodak24	kodim22	160	0.896395	30.4687
BERNOULLI	Kodak24	kodim22	170	0.881483	29.9232
BERNOULLI	Kodak24	kodim22	180	0.866073	29.5906
BERNOULLI	Kodak24	kodim22	190	0.846124	28.9575
BERNOULLI	Kodak24	kodim22	200	0.824045	28.4695
BERNOULLI	Kodak24	kodim22	210	0.798316	27.9065
BERNOULLI	Kodak24	kodim22	220	0.762773	27.2648
BERNOULLI	Kodak24	kodim22	230	0.717941	26.2262
BERNOULLI	Kodak24	kodim22	240	0.655984	25.1621
BERNOULLI	Kodak24	kodim05	150	0.927755	27.7907
BERNOULLI	Kodak24	kodim05	160	0.914011	27.2171
BERNOULLI	Kodak24	kodim05	170	0.900491	26.6504
BERNOULLI	Kodak24	kodim05	180	0.879603	25.9089
BERNOULLI	Kodak24	kodim05	190	0.857582	25.2689
BERNOULLI	Kodak24	kodim05	200	0.828018	24.5799
BERNOULLI	Kodak24	kodim05	210	0.789787	23.687
BERNOULLI	Kodak24	kodim05	220	0.742845	22.7539
BERNOULLI	Kodak24	kodim05	230	0.67624	21.688
BERNOULLI	Kodak24	kodim05	240	0.573752	20.3572
BERNOULLI	Kodak24	kodim13	150	0.825119	24.3561
BERNOULLI	Kodak24	kodim13	160	0.801121	23.7871
BERNOULLI	Kodak24	kodim13	170	0.777077	23.3705
BERNOULLI	Kodak24	kodim13	180	0.745158	22.8173
BERNOULLI	Kodak24	kodim13	190	0.708564	22.2269
BERNOULLI	Kodak24	kodim13	200	0.673008	21.8014
BERNOULLI	Kodak24	kodim13	210	0.623699	21.2226
BERNOULLI	Kodak24	kodim13	220	0.57108	20.6848
BERNOULLI	Kodak24	kodim13	230	0.500273	19.9833
BERNOULLI	Kodak24	kodim13	240	0.416309	19.138
BERNOULLI	Kodak24	kodim18	150	0.902264	28.6792
BERNOULLI	Kodak24	kodim18	160	0.889841	28.152
BERNOULLI	Kodak24	kodim18	170	0.87269	27.6244
BERNOULLI	Kodak24	kodim18	180	0.855347	27.0435
BERNOULLI	Kodak24	kodim18	190	0.830078	26.3912
BERNOULLI	Kodak24	kodim18	200	0.805141	25.8163
BERNOULLI	Kodak24	kodim18	210	0.768875	25.1662
BERNOULLI	Kodak24	kodim18	220	0.730413	24.5585
BERNOULLI	Kodak24	kodim18	230	0.671235	23.5924
BERNOULLI	Kodak24	kodim18	240	0.596467	22.5542
BERNOULLI	Kodak24	kodim10	150	0.952385	32.5369
BERNOULLI	Kodak24	kodim10	160	0.9465	32.0831
BERNOULLI	Kodak24	kodim10	170	0.939222	31.5722
BERNOULLI	Kodak24	kodim10	180	0.93047	30.9928
BERNOULLI	Kodak24	kodim10	190	0.920924	30.3338
BERNOULLI	Kodak24	kodim10	200	0.908382	29.9021
BERNOULLI	Kodak24	kodim10	210	0.890163	28.9662
BERNOULLI	Kodak24	kodim10	220	0.869402	28.2596
BERNOULLI	Kodak24	kodim10	230	0.833741	26.9583
BERNOULLI	Kodak24	kodim10	240	0.780561	25.7184
BERNOULLI	Kodak24	kodim08	150	0.913608	26.8135
BERNOULLI	Kodak24	kodim08	160	0.90028	26.1494
BERNOULLI	Kodak24	kodim08	170	0.885452	25.4905
BERNOULLI	Kodak24	kodim08	180	0.866446	24.7644
BERNOULLI	Kodak24	kodim08	190	0.846089	24.1268
BERNOULLI	Kodak24	kodim08	200	0.81722	23.2534
BERNOULLI	Kodak24	kodim08	210	0.784391	22.4346
BERNOULLI	Kodak24	kodim08	220	0.737853	21.4176
BERNOULLI	Kodak24	kodim08	230	0.675321	20.3024
BERNOULLI	Kodak24	kodim08	240	0.579698	18.848
BERNOULLI	Kodak24	kodim19	150	0.917414	32.0329
BERNOULLI	Kodak24	kodim19	160	0.906607	31.4486
BERNOULLI	Kodak24	kodim19	170	0.895216	30.8823
BERNOULLI	Kodak24	kodim19	180	0.881187	30.1651
BERNOULLI	Kodak24	kodim19	190	0.863742	29.37
BERNOULLI	Kodak24	kodim19	200	0.846652	28.6662
BERNOULLI	Kodak24	kodim19	210	0.825396	27.8328
BERNOULLI	Kodak24	kodim19	220	0.792429	26.6267
BERNOULLI	Kodak24	kodim19	230	0.751517	25.3941
BERNOULLI	Kodak24	kodim19	240	0.691412	23.5562
BERNOULLI	Kodak24	kodim16	150	0.92953	31.0988
BERNOULLI	Kodak24	kodim16	160	0.918391	30.7462
BERNOULLI	Kodak24	kodim16	170	0.906375	30.3865
BERNOULLI	Kodak24	kodim16	180	0.892297	30.0099
BERNOULLI	Kodak24	kodim16	190	0.876059	29.6537
BERNOULLI	Kodak24	kodim16	200	0.855547	29.2141
BERNOULLI	Kodak24	kodim16	210	0.831529	28.7365
BERNOULLI	Kodak24	kodim16	220	0.799935	28.1687
BERNOULLI	Kodak24	kodim16	230	0.752245	27.4554
BERNOULLI	Kodak24	kodim16	240	0.695388	26.7454
BERNOULLI	Kodak24	kodim21	150	0.921896	29.0222
BERNOULLI	Kodak24	kodim21	160	0.911866	28.5464
BERNOULLI	Kodak24	kodim21	170	0.901355	28.1314
BERNOULLI	Kodak24	kodim21	180	0.88757	27.5945
BERNOULLI	Kodak24	kodim21	190	0.870949	26.989
BERNOULLI	Kodak24	kodim21	200	0.853218	26.4113
BERNOULLI	Kodak24	kodim21	210	0.828196	25.6832
BERNOULLI	Kodak24	kodim21	220	0.80105	25.0019
BERNOULLI	Kodak24	kodim21	230	0.758134	24.0419
BERNOULLI	Kodak24	kodim21	240	0.703217	22.9574
BERNOULLI	BSD68	16	150	0.930533	30.35
BERNOULLI	BSD68	16	160	0.922685	29.8089
BERNOULLI	BSD68	16	170	0.909806	29.1646
BERNOULLI	BSD68	16	180	0.897574	28.621
BERNOULLI	BSD68	16	190	0.879699	27.9867
BERNOULLI	BSD68	16	200	0.859623	26.9697
BERNOULLI	BSD68	16	210	0.833448	26.3427
BERNOULLI	BSD68	16	220	0.80805	25.6893
BERNOULLI	BSD68	16	230	0.758762	24.3615
BERNOULLI	BSD68	16	240	0.679296	22.719
BERNOULLI	BSD68	62	150	0.903821	30.8359
BERNOULLI	BSD68	62	160	0.8913	30.3482
BERNOULLI	BSD68	62	170	0.877677	29.802
BERNOULLI	BSD68	62	180	0.862141	29.2731
BERNOULLI	BSD68	62	190	0.846499	28.8678
BERNOULLI	BSD68	62	200	0.822679	28.0806
BERNOULLI	BSD68	62	210	0.803594	27.5345
BERNOULLI	BSD68	62	220	0.776779	26.9108
BERNOULLI	BSD68	62	230	0.739982	25.7263
BERNOULLI	BSD68	62	240	0.695467	24.7108
BERNOULLI	BSD68	46	150	0.898788	27.3717
BERNOULLI	BSD68	46	160	0.886472	26.9311
BERNOULLI	BSD68	46	170	0.868015	26.3004
BERNOULLI	BSD68	46	180	0.845505	25.566
BERNOULLI	BSD68	46	190	0.819869	25.0223
BERNOULLI	BSD68	46	200	0.788097	24.3639
BERNOULLI	BSD68	46	210	0.748913	23.6357
BERNOULLI	BSD68	46	220	0.702405	22.9834
BERNOULLI	BSD68	46	230	0.639562	22.1804
BERNOULLI	BSD68	46	240	0.56001	21.3144
BERNOULLI	BSD68	33	150	0.806048	21.4733
BERNOULLI	BSD68	33	160	0.781579	21.0005
BERNOULLI	BSD68	33	170	0.758497	20.5614
BERNOULLI	BSD68	33	180	0.728039	20.0886
BERNOULLI	BSD68	33	190	0.691037	19.5426
BERNOULLI	BSD68	33	200	0.653676	19.1151
BERNOULLI	BSD68	33	210	0.606519	18.5553
BERNOULLI	BSD68	33	220	0.557417	18.0388
BERNOULLI	BSD68	33	230	0.499979	17.5049
BERNOULLI	BSD68	33	240	0.418545	16.6952
BERNOULLI	BSD68	9	150	0.937893	31.1639
BERNOULLI	BSD68	9	160	0.928797	30.6053
BERNOULLI	BSD68	9	170	0.918196	29.8767
BERNOULLI	BSD68	9	180	0.906558	29.0274
BERNOULLI	BSD68	9	190	0.89034	28.7044
BERNOULLI	BSD68	9	200	0.873959	28.0139
BERNOULLI	BSD68	9	210	0.853617	27.0971
BERNOULLI	BSD68	9	220	0.828906	26.2936
BERNOULLI	BSD68	9	230	0.790986	25.4743
BERNOULLI	BSD68	9	240	0.746645	24.0326
BERNOULLI	BSD68	49	150	0.88742	27.5372
BERNOULLI	BSD68	49	160	0.871262	26.9899
BERNOULLI	BSD68	49	170	0.850235	26.3856
BERNOULLI	BSD68	49	180	0.826948	25.8024
BERNOULLI	BSD68	49	190	0.799943	25.1881
BERNOULLI	BSD68	49	200	0.766472	24.5229
BERNOULLI	BSD68	49	210	0.729325	23.9528
BERNOULLI	BSD68	49	220	0.675557	23.1542
BERNOULLI	BSD68	49	230	0.606233	22.4503
BERNOULLI	BSD68	49	240	0.500835	21.4008
BERNOULLI	BSD68	17	150	0.932426	31.9378
BERNOULLI	BSD68	17	160	0.925369	31.477
BERNOULLI	BSD68	17	170	0.912197	30.7554
BERNOULLI	BSD68	17	180	0.898373	30.1248
BERNOULLI	BSD68	17	190	0.881443	29.428
BERNOULLI	BSD68	17	200	0.862211	28.8372
BERNOULLI	BSD68	17	210	0.83754	28.1105
BERNOULLI	BSD68	17	220	0.804819	27.2402
BERNOULLI	BSD68	17	230	0.76885	26.4691
BERNOULLI	BSD68	17	240	0.707709	25.4876
BERNOULLI	BSD68	15	150	0.868225	25.3456
BERNOULLI	BSD68	15	160	0.847404	24.6459
BERNOULLI	BSD68	15	170	0.821351	24.1716
BERNOULLI	BSD68	15	180	0.798426	23.6029
BERNOULLI	BSD68	15	190	0.768392	23.1518
BERNOULLI	BSD68	15	200	0.723519	22.4526
BERNOULLI	BSD68	15	210	0.676041	21.7203
BERNOULLI	BSD68	15	220	0.614709	21.1545
BERNOULLI	BSD68	15	230	0.539031	20.3086
BERNOULLI	BSD68	15	240	0.46003	19.755
BERNOULLI	BSD68	52	150	0.906006	27.9042
BERNOULLI	BSD68	52	160	0.89163	27.0366
BERNOULLI	BSD68	52	170	0.877723	26.3526
BERNOULLI	BSD68	52	180	0.8594	25.6163
BERNOULLI	BSD68	52	190	0.837345	24.9411
BERNOULLI	BSD68	52	200	0.81252	24.0315
BERNOULLI	BSD68	52	210	0.77836	22.9824
BERNOULLI	BSD68	52	220	0.741425	21.8481
BERNOULLI	BSD68	52	230	0.688184	20.9456
BERNOULLI	BSD68	52	240	0.607757	19.4463
BERNOULLI	BSD68	25	150	0.900814	27.3965
BERNOULLI	BSD68	25	160	0.89075	26.9283
BERNOULLI	BSD68	25	170	0.877856	26.3549
BERNOULLI	BSD68	25	180	0.862555	25.8407
BERNOULLI	BSD68	25	190	0.847916	25.3779
BERNOULLI	BSD68	25	200	0.830121	24.7861
BERNOULLI	BSD68	25	210	0.809055	24.1817
BERNOULLI	BSD68	25	220	0.783957	23.4046
BERNOULLI	BSD68	25	230	0.750786	22.6299
BERNOULLI	BSD68	25	240	0.709651	21.6352
BERNOULLI	BSD68	22	150	0.936978	29.0003
BERNOULLI	BSD68	22	160	0.9257	28.2019
BERNOULLI	BSD68	22	170	0.911418	27.3691
BERNOULLI	BSD68	22	180	0.898109	26.795
BERNOULLI	BSD68	22	190	0.874074	25.6053
BERNOULLI	BSD68	22	200	0.848242	24.5482
BERNOULLI	BSD68	22	210	0.816978	23.7098
BERNOULLI	BSD68	22	220	0.765366	22.2966
BERNOULLI	BSD68	22	230	0.690312	20.8894
BERNOULLI	BSD68	22	240	0.5835	19.3648
BERNOULLI	BSD68	61	150	0.908223	33.3579
BERNOULLI	BSD68	61	160	0.897809	32.9142
BERNOULLI	BSD68	61	170	0.884996	32.4297
BERNOULLI	BSD68	61	180	0.872272	31.8708
BERNOULLI	BSD68	61	190	0.858238	31.3884
BERNOULLI	BSD68	61	200	0.843752	31.0176
BERNOULLI	BSD68	61	210	0.822838	30.3588
BERNOULLI	BSD68	61	220	0.801088	29.8294
BERNOULLI	BSD68	61	230	0.771759	29.0181
BERNOULLI	BSD68	61	240	0.731253	28.0844
BERNOULLI	BSD68	51	150	0.872032	27.4878
BERNOULLI	BSD68	51	160	0.856355	26.9789
BERNOULLI	BSD68	51	170	0.83849	26.493
BERNOULLI	BSD68	51	180	0.81766	25.9608
BERNOULLI	BSD68	51	190	0.790133	25.4097
BERNOULLI	BSD68	51	200	0.763956	24.898
BERNOULLI	BSD68	51	210	0.722912	24.15
BERNOULLI	BSD68	51	220	0.685385	23.6083
BERNOULLI	BSD68	51	230	0.62846	22.8185
BERNOULLI	BSD68	51	240	0.553999	21.854
BERNOULLI	BSD68	35	150	0.818541	23.3836
BERNOULLI	BSD68	35	160	0.791357	22.8805
BERNOULLI	BSD68	35	170	0.762576	22.3577
BERNOULLI	BSD68	35	180	0.725137	21.8015
BERNOULLI	BSD68	35	190	0.686883	21.2902
BERNOULLI	BSD68	35	200	0.641653	20.7441
BERNOULLI	BSD68	35	210	0.581028	20.167
BERNOULLI	BSD68	35	220	0.506756	19.5136
BERNOULLI	BSD68	35	230	0.424371	18.9001
BERNOULLI	BSD68	35	240	0.328674	18.3098
BERNOULLI	BSD68	8	150	0.823254	25.6083
BERNOULLI	BSD68	8	160	0.802718	25.221
BERNOULLI	BSD68	8	170	0.777723	24.6937
BERNOULLI	BSD68	8	180	0.752589	24.1751
BERNOULLI	BSD68	8	190	0.720157	23.7202
BERNOULLI	BSD68	8	200	0.689347	23.1789
BERNOULLI	BSD68	8	210	0.648187	22.6802
BERNOULLI	BSD68	8	220	0.604106	22.0821
BERNOULLI	BSD68	8	230	0.544408	21.4647
BERNOULLI	BSD68	8	240	0.469054	20.5472
BERNOULLI	BSD68	38	150	0.950243	37.5722
BERNOULLI	BSD68	38	160	0.944404	36.9187
BERNOULLI	BSD68	38	170	0.937161	36.2361
BERNOULLI	BSD68	38	180	0.93109	35.6879
BERNOULLI	BSD68	38	190	0.922499	35.0594
BERNOULLI	BSD68	38	200	0.913306	33.9296
BERNOULLI	BSD68	38	210	0.90203	33.4785
BERNOULLI	BSD68	38	220	0.889389	32.527
BERNOULLI	BSD68	38	230	0.867178	31.2005
BERNOULLI	BSD68	38	240	0.830146	28.9196
BERNOULLI	BSD68	10	150	0.927573	29.4574
BERNOULLI	BSD68	10	160	0.918809	28.8998
BERNOULLI	BSD68	10	170	0.908977	28.2986
BERNOULLI	BSD68	10	180	0.896684	27.5704
BERNOULLI	BSD68	10	190	0.887597	27.4485
BERNOULLI	BSD68	10	200	0.869605	26.4153
BERNOULLI	BSD68	10	210	0.851128	25.7404
BERNOULLI	BSD68	10	220	0.828301	24.9301
BERNOULLI	BSD68	10	230	0.790877	23.7749
BERNOULLI	BSD68	10	240	0.740657	22.516
BERNOULLI	BSD68	32	150	0.939127	33.5916
BERNOULLI	BSD68	32	160	0.931966	33.3082
BERNOULLI	BSD68	32	170	0.925993	32.764
BERNOULLI	BSD68	32	180	0.913841	32.0581
BERNOULLI	BSD68	32	190	0.903187	31.1697
BERNOULLI	BSD68	32	200	0.891947	30.4753
BERNOULLI	BSD68	32	210	0.878427	30.1889
BERNOULLI	BSD68	32	220	0.861661	28.9551
BERNOULLI	BSD68	32	230	0.843146	27.981
BERNOULLI	BSD68	32	240	0.819857	26.2657
BERNOULLI	BSD68	23	150	0.964278	35.7939
BERNOULLI	BSD68	23	160	0.95952	35.1627
BERNOULLI	BSD68	23	170	0.953901	34.6944
BERNOULLI	BSD68	23	180	0.948087	34.1734
BERNOULLI	BSD68	23	190	0.942211	33.451
BERNOULLI	BSD68	23	200	0.930169	32.8466
BERNOULLI	BSD68	23	210	0.919286	31.9518
BERNOULLI	BSD68	23	220	0.904011	31.2173
BERNOULLI	BSD68	23	230	0.880442	30.2296
BERNOULLI	BSD68	23	240	0.844322	28.7843
BERNOULLI	BSD68	29	150	0.948356	30.6768
BERNOULLI	BSD68	29	160	0.938015	29.8583
BERNOULLI	BSD68	29	170	0.928288	29.1454
BERNOULLI	BSD68	29	180	0.917156	28.5002
BERNOULLI	BSD68	29	190	0.898923	27.6648
BERNOULLI	BSD68	29	200	0.879946	26.793
BERNOULLI	BSD68	29	210	0.857777	26.1401
BERNOULLI	BSD68	29	220	0.821702	24.8449
BERNOULLI	BSD68	29	230	0.766597	23.4913
BERNOULLI	BSD68	29	240	0.688373	21.888
BERNOULLI	BSD68	63	150	0.977185	37.018
BERNOULLI	BSD68	63	160	0.974742	36.6804
BERNOULLI	BSD68	63	170	0.970256	35.2281
BERNOULLI	BSD68	63	180	0.966366	34.2823
BERNOULLI	BSD68	63	190	0.963162	33.7894
BERNOULLI	BSD68	63	200	0.958302	32.499
BERNOULLI	BSD68	63	210	0.9513	31.3809
BERNOULLI	BSD68	63	220	0.93812	29.1561
BERNOULLI	BSD68	63	230	0.917918	26.7404
BERNOULLI	BSD68	63	240	0.877733	23.9536
BERNOULLI	BSD68	57	150	0.768017	22.7417
BERNOULLI	BSD68	57	160	0.739891	22.2776
BERNOULLI	BSD68	57	170	0.707467	21.8263
BERNOULLI	BSD68	57	180	0.666884	21.3272
BERNOULLI	BSD68	57	190	0.636586	20.9702
BERNOULLI	BSD68	57	200	0.593109	20.5586
BERNOULLI	BSD68	57	210	0.536679	20.0646
BERNOULLI	BSD68	57	220	0.47785	19.5271
BERNOULLI	BSD68	57	230	0.410593	19.044
BERNOULLI	BSD68	57	240	0.33151	18.4001
BERNOULLI	BSD68	19	150	0.951517	33.6465
BERNOULLI	BSD68	19	160	0.942352	32.9185
BERNOULLI	BSD68	19	170	0.933242	32.1918
BERNOULLI	BSD68	19	180	0.920591	31.609
BERNOULLI	BSD68	19	190	0.904368	30.7489
BERNOULLI	BSD68	19	200	0.888675	30.1599
BERNOULLI	BSD68	19	210	0.860887	29.2197
BERNOULLI	BSD68	19	220	0.826181	28.2028
BERNOULLI	BSD68	19	230	0.77567	27.1738
BERNOULLI	BSD68	19	240	0.69614	25.5951
BERNOULLI	BSD68	58	150	0.886374	29.2471
BERNOULLI	BSD68	58	160	0.873519	28.8454
BERNOULLI	BSD68	58	170	0.85529	28.2671
BERNOULLI	BSD68	58	180	0.835392	27.6618
BERNOULLI	BSD68	58	190	0.813166	27.1834
BERNOULLI	BSD68	58	200	0.79002	26.673
BERNOULLI	BSD68	58	210	0.765918	26.2289
BERNOULLI	BSD68	58	220	0.73403	25.6645
BERNOULLI	BSD68	58	230	0.695177	25.0351
BERNOULLI	BSD68	58	240	0.644985	24.2482
BERNOULLI	BSD68	66	150	0.92053	30.5647
BERNOULLI	BSD68	66	160	0.909278	30.0104
BERNOULLI	BSD68	66	170	0.897417	29.5187
BERNOULLI	BSD68	66	180	0.880906	28.8277
BERNOULLI	BSD68	66	190	0.861631	28.1246
BERNOULLI	BSD68	66	200	0.843335	27.5798
BERNOULLI	BSD68	66	210	0.820633	26.9647
BERNOULLI	BSD68	66	220	0.786674	25.9845
BERNOULLI	BSD68	66	230	0.744419	24.9728
BERNOULLI	BSD68	66	240	0.692996	23.982
BERNOULLI	BSD68	56	150	0.893198	28.0889
BERNOULLI	BSD68	56	160	0.878179	27.5284
BERNOULLI	BSD68	56	170	0.859152	26.8489
BERNOULLI	BSD68	56	180	0.840733	26.3905
BERNOULLI	BSD68	56	190	0.814285	25.5697
BERNOULLI	BSD68	56	200	0.78376	24.7125
BERNOULLI	BSD68	56	210	0.746955	23.9739
BERNOULLI	BSD68	56	220	0.701628	23.1452
BERNOULLI	BSD68	56	230	0.635718	22.071
BERNOULLI	BSD68	56	240	0.553259	20.7647
BERNOULLI	BSD68	44	150	0.913334	29.6436
BERNOULLI	BSD68	44	160	0.901141	29.017
BERNOULLI	BSD68	44	170	0.890926	28.5182
BERNOULLI	BSD68	44	180	0.872643	27.8242
BERNOULLI	BSD68	44	190	0.853989	27.1577
BERNOULLI	BSD68	44	200	0.833361	26.5014
BERNOULLI	BSD68	44	210	0.80604	25.5228
BERNOULLI	BSD68	44	220	0.771617	24.7968
BERNOULLI	BSD68	44	230	0.732361	23.9706
BERNOULLI	BSD68	44	240	0.677073	22.7746
BERNOULLI	BSD68	18	150	0.93257	29.1066
BERNOULLI	BSD68	18	160	0.920554	28.2363
BERNOULLI	BSD68	18	170	0.910017	27.715
BERNOULLI	BSD68	18	180	0.89463	27.0201
BERNOULLI	BSD68	18	190	0.879982	26.3403
BERNOULLI	BSD68	18	200	0.854926	25.4768
BERNOULLI	BSD68	18	210	0.830474	24.6509
BERNOULLI	BSD68	18	220	0.793069	23.6642
BERNOULLI	BSD68	18	230	0.734079	22.4252
BERNOULLI	BSD68	18	240	0.631528	20.5567
BERNOULLI	BSD68	7	150	0.876219	23.9607
BERNOULLI	BSD68	7	160	0.85609	23.3308
BERNOULLI	BSD68	7	170	0.838242	22.7668
BERNOULLI	BSD68	7	180	0.81215	22.102
BERNOULLI	BSD68	7	190	0.781032	21.4709
BERNOULLI	BSD68	7	200	0.745813	20.7827
BERNOULLI	BSD68	7	210	0.704315	20.0742
BERNOULLI	BSD68	7	220	0.644767	19.3226
BERNOULLI	BSD68	7	230	0.572684	18.4439
BERNOULLI	BSD68	7	240	0.462451	17.1823
BERNOULLI	BSD68	6	150	0.964735	30.7727
BERNOULLI	BSD68	6	160	0.958831	30.0256
BERNOULLI	BSD68	6	170	0.950871	29.05
BERNOULLI	BSD68	6	180	0.942711	28.3304
BERNOULLI	BSD68	6	190	0.930535	27.2538
BERNOULLI	BSD68	6	200	0.91713	26.5244
BERNOULLI	BSD68	6	210	0.893308	25.2351
BERNOULLI	BSD68	6	220	0.868361	24.1654
BERNOULLI	BSD68	6	230	0.828473	22.9474
BERNOULLI	BSD68	6	240	0.743297	20.3124
BERNOULLI	BSD68	26	150	0.89571	24.8452
BERNOULLI	BSD68	26	160	0.877999	24.0628
BERNOULLI	BSD68	26	170	0.863432	23.6615
BERNOULLI	BSD68	26	180	0.837453	22.9363
BERNOULLI	BSD68	26	190	0.812362	22.2464
BERNOULLI	BSD68	26	200	0.776496	21.5065
BERNOULLI	BSD68	26	210	0.737723	20.7955
BERNOULLI	BSD68	26	220	0.690918	20.0613
BERNOULLI	BSD68	26	230	0.618979	19.0487
BERNOULLI	BSD68	26	240	0.529767	18.0244
BERNOULLI	BSD68	1	150	0.922785	31.4067
BERNOULLI	BSD68	1	160	0.908937	30.6202
BERNOULLI	BSD68	1	170	0.894156	29.8685
BERNOULLI	BSD68	1	180	0.873527	29.1261
BERNOULLI	BSD68	1	190	0.852509	28.2404
BERNOULLI	BSD68	1	200	0.828644	27.7446
BERNOULLI	BSD68	1	210	0.789154	26.695
BERNOULLI	BSD68	1	220	0.739913	25.6261
BERNOULLI	BSD68	1	230	0.66472	24.2906
BERNOULLI	BSD68	1	240	0.561079	22.8001
BERNOULLI	BSD68	21	150	0.885232	27.3284
BERNOULLI	BSD68	21	160	0.871757	26.8493
BERNOULLI	BSD68	21	170	0.851331	26.1894
BERNOULLI	BSD68	21	180	0.827038	25.6542
BERNOULLI	BSD68	21	190	0.803748	25.1278
BERNOULLI	BSD68	21	200	0.770032	24.4745
BERNOULLI	BSD68	21	210	0.73568	23.9338
BERNOULLI	BSD68	21	220	0.694052	23.2467
BERNOULLI	BSD68	21	230	0.639017	22.4108
BERNOULLI	BSD68	21	240	0.567482	21.471
BERNOULLI	BSD68	53	150	0.930097	34.7243
BERNOULLI	BSD68	53	160	0.921303	34.2739
BERNOULLI	BSD68	53	170	0.912491	33.8265
BERNOULLI	BSD68	53	180	0.901836	33.172
BERNOULLI	BSD68	53	190	0.887078	32.4889
BERNOULLI	BSD68	53	200	0.87684	32.0088
BERNOULLI	BSD68	53	210	0.857952	31.312
BERNOULLI	BSD68	53	220	0.838063	30.5945
BERNOULLI	BSD68	53	230	0.813071	29.9501
BERNOULLI	BSD68	53	240	0.775767	28.8377
BERNOULLI	BSD68	30	150	0.95214	30.1195
BERNOULLI	BSD68	30	160	0.943741	29.2782
BERNOULLI	BSD68	30	170	0.936248	28.8011
BERNOULLI	BSD68	30	180	0.926742	28.1788
BERNOULLI	BSD68	30	190	0.915591	27.506
BERNOULLI	BSD68	30	200	0.900474	26.7812
BERNOULLI	BSD68	30	210	0.877946	25.8085
BERNOULLI	BSD68	30	220	0.857062	24.9986
BERNOULLI	BSD68	30	230	0.824024	24.0412
BERNOULLI	BSD68	30	240	0.77532	22.6559
BERNOULLI	BSD68	3	150	0.913724	30.6253
BERNOULLI	BSD68	3	160	0.900371	29.9929
BERNOULLI	BSD68	3	170	0.888009	29.4948
BERNOULLI	BSD68	3	180	0.870541	28.8674
BERNOULLI	BSD68	3	190	0.851494	28.1982
BERNOULLI	BSD68	3	200	0.830598	27.5723
BERNOULLI	BSD68	3	210	0.801883	26.799
BERNOULLI	BSD68	3	220	0.766701	25.8627
BERNOULLI	BSD68	3	230	0.716915	24.9081
BERNOULLI	BSD68	3	240	0.643962	23.6059
BERNOULLI	BSD68	36	150	0.909905	28.3069
BERNOULLI	BSD68	36	160	0.892975	27.5829
BERNOULLI	BSD68	36	170	0.87746	26.9989
BERNOULLI	BSD68	36	180	0.854774	26.2872
BERNOULLI	BSD68	36	190	0.827927	25.5667
BERNOULLI	BSD68	36	200	0.795851	24.8593
BERNOULLI	BSD68	36	210	0.753906	24.0248
BERNOULLI	BSD68	36	220	0.696685	23.1314
BERNOULLI	BSD68	36	230	0.625024	22.218
BERNOULLI	BSD68	36	240	0.51541	20.9147
BERNOULLI	BSD68	20	150	0.933448	32.421
BERNOULLI	BSD68	20	160	0.922633	31.6399
BERNOULLI	BSD68	20	170	0.913744	31.1574
BERNOULLI	BSD68	20	180	0.901465	30.4027
BERNOULLI	BSD68	20	190	0.888678	29.8093
BERNOULLI	BSD68	20	200	0.870748	29.0705
BERNOULLI	BSD68	20	210	0.847131	28.0919
BERNOULLI	BSD68	20	220	0.82437	27.4582
BERNOULLI	BSD68	20	230	0.791936	26.3946
BERNOULLI	BSD68	20	240	0.738397	24.9255
BERNOULLI	BSD68	34	150	0.948422	33.2473
BERNOULLI	BSD68	34	160	0.938224	32.313
BERNOULLI	BSD68	34	170	0.928882	31.8102
BERNOULLI	BSD68	34	180	0.917304	31.0583
BERNOULLI	BSD68	34	190	0.901329	30.2621
BERNOULLI	BSD68	34	200	0.886595	29.7686
BERNOULLI	BSD68	34	210	0.860768	28.8008
BERNOULLI	BSD68	34	220	0.825436	27.9735
BERNOULLI	BSD68	34	230	0.773206	26.5809
BERNOULLI	BSD68	34	240	0.690048	25.2877
BERNOULLI	BSD68	28	150	0.941059	28.8891
BERNOULLI	BSD68	28	160	0.933519	28.2826
BERNOULLI	BSD68	28	170	0.921417	27.7581
BERNOULLI	BSD68	28	180	0.909922	27.183
BERNOULLI	BSD68	28	190	0.892874	26.4178
BERNOULLI	BSD68	28	200	0.87346	25.9432
BERNOULLI	BSD68	28	210	0.84689	25.0326
BERNOULLI	BSD68	28	220	0.816413	24.3416
BERNOULLI	BSD68	28	230	0.76331	23.5451
BERNOULLI	BSD68	28	240	0.689578	22.2281
BERNOULLI	BSD68	5	150	0.896571	29.8838
BERNOULLI	BSD68	5	160	0.884827	29.3494
BERNOULLI	BSD68	5	170	0.870604	28.5555
BERNOULLI	BSD68	5	180	0.855458	27.9331
BERNOULLI	BSD68	5	190	0.839652	27.4089
BERNOULLI	BSD68	5	200	0.815311	26.5088
BERNOULLI	BSD68	5	210	0.792203	25.8106
BERNOULLI	BSD68	5	220	0.760085	25.052
BERNOULLI	BSD68	5	230	0.718523	23.9641
BERNOULLI	BSD68	5	240	0.649266	22.4611
BERNOULLI	BSD68	43	150	0.891519	28.0132
BERNOULLI	BSD68	43	160	0.876892	27.469
BERNOULLI	BSD68	43	170	0.861227	26.7962
BERNOULLI	BSD68	43	180	0.841956	26.209
BERNOULLI	BSD68	43	190	0.82274	25.7262
BERNOULLI	BSD68	43	200	0.795395	25.0254
BERNOULLI	BSD68	43	210	0.765719	24.3351
BERNOULLI	BSD68	43	220	0.730824	23.6705
BERNOULLI	BSD68	43	230	0.681338	22.8303
BERNOULLI	BSD68	43	240	0.618528	21.646
BERNOULLI	BSD68	55	150	0.933885	31.5561
BERNOULLI	BSD68	55	160	0.922319	30.7072
BERNOULLI	BSD68	55	170	0.912214	30.1079
BERNOULLI	BSD68	55	180	0.896472	29.3749
BERNOULLI	BSD68	55	190	0.876858	28.4067
BERNOULLI	BSD68	55	200	0.858956	27.8373
BERNOULLI	BSD68	55	210	0.826299	26.76
BERNOULLI	BSD68	55	220	0.786839	25.5404
BERNOULLI	BSD68	55	230	0.735699	24.3714
BERNOULLI	BSD68	55	240	0.656776	22.9162
BERNOULLI	BSD68	67	150	0.860634	24.4179
BERNOULLI	BSD68	67	160	0.842997	23.8265
BERNOULLI	BSD68	67	170	0.820763	23.2953
BERNOULLI	BSD68	67	180	0.796414	22.7797
BERNOULLI	BSD68	67	190	0.775676	22.413
BERNOULLI	BSD68	67	200	0.745444	21.8924
BERNOULLI	BSD68	67	210	0.710416	21.3172
BERNOULLI	BSD68	67	220	0.674583	20.8206
BERNOULLI	BSD68	67	230	0.620563	19.9431
BERNOULLI	BSD68	67	240	0.558364	19.1745
BERNOULLI	BSD68	41	150	0.936066	32.2816
BERNOULLI	BSD68	41	160	0.923627	31.6111
BERNOULLI	BSD68	41	170	0.909434	30.8634
BERNOULLI	BSD68	41	180	0.892512	30.0554
BERNOULLI	BSD68	41	190	0.872219	29.4041
BERNOULLI	BSD68	41	200	0.846423	28.595
BERNOULLI	BSD68	41	210	0.81367	27.6824
BERNOULLI	BSD68	41	220	0.760423	26.5563
BERNOULLI	BSD68	41	230	0.699601	25.6681
BERNOULLI	BSD68	41	240	0.617359	24.5243
BERNOULLI	BSD68	0	150	0.986688	41.0075
BERNOULLI	BSD68	0	160	0.985806	40.6125
BERNOULLI	BSD68	0	170	0.984156	40.0977
BERNOULLI	BSD68	0	180	0.981991	38.7321
BERNOULLI	BSD68	0	190	0.979956	38.1039
BERNOULLI	BSD68	0	200	0.978039	37.7632
BERNOULLI	BSD68	0	210	0.974763	36.7224
BERNOULLI	BSD68	0	220	0.97049	35.8276
BERNOULLI	BSD68	0	230	0.962619	34.1874
BERNOULLI	BSD68	0	240	0.951593	32.6001
BERNOULLI	BSD68	13	150	0.961261	36.6455
BERNOULLI	BSD68	13	160	0.956936	36.1342
BERNOULLI	BSD68	13	170	0.950805	35.629
BERNOULLI	BSD68	13	180	0.94528	34.9569
BERNOULLI	BSD68	13	190	0.935329	34.1703
BERNOULLI	BSD68	13	200	0.928596	33.7893
BERNOULLI	BSD68	13	210	0.914979	32.6436
BERNOULLI	BSD68	13	220	0.898716	31.8428
BERNOULLI	BSD68	13	230	0.876579	30.5175
BERNOULLI	BSD68	13	240	0.842363	28.7501
BERNOULLI	BSD68	48	150	0.864471	25.2547
BERNOULLI	BSD68	48	160	0.844834	24.4913
BERNOULLI	BSD68	48	170	0.822392	24.0192
BERNOULLI	BSD68	48	180	0.79572	23.3435
BERNOULLI	BSD68	48	190	0.766849	22.8356
BERNOULLI	BSD68	48	200	0.730916	22.0949
BERNOULLI	BSD68	48	210	0.686941	21.3993
BERNOULLI	BSD68	48	220	0.634262	20.5914
BERNOULLI	BSD68	48	230	0.566522	19.8245
BERNOULLI	BSD68	48	240	0.469812	18.7954
BERNOULLI	BSD68	45	150	0.965936	31.5184
BERNOULLI	BSD68	45	160	0.960372	30.7286
BERNOULLI	BSD68	45	170	0.954114	30.3094
BERNOULLI	BSD68	45	180	0.946177	29.4584
BERNOULLI	BSD68	45	190	0.935464	28.3052
BERNOULLI	BSD68	45	200	0.922861	27.7815
BERNOULLI	BSD68	45	210	0.905193	26.8057
BERNOULLI	BSD68	45	220	0.879742	25.3499
BERNOULLI	BSD68	45	230	0.842006	24.4047
BERNOULLI	BSD68	45	240	0.77688	22.6374
BERNOULLI	BSD68	54	150	0.912008	34.6627
BERNOULLI	BSD68	54	160	0.899459	34.0475
BERNOULLI	BSD68	54	170	0.886297	33.4666
BERNOULLI	BSD68	54	180	0.874271	33.0009
BERNOULLI	BSD68	54	190	0.858546	32.5631
BERNOULLI	BSD68	54	200	0.835027	31.9103
BERNOULLI	BSD68	54	210	0.815165	31.3723
BERNOULLI	BSD68	54	220	0.785678	30.711
BERNOULLI	BSD68	54	230	0.75236	29.9985
BERNOULLI	BSD68	54	240	0.707141	29.1522
BERNOULLI	BSD68	60	150	0.898158	32.552
BERNOULLI	BSD68	60	160	0.886416	32.1387
BERNOULLI	BSD68	60	170	0.874571	31.6737
BERNOULLI	BSD68	60	180	0.858825	31.0957
BERNOULLI	BSD68	60	190	0.842651	30.7409
BERNOULLI	BSD68	60	200	0.821487	30.1839
BERNOULLI	BSD68	60	210	0.803817	29.6816
BERNOULLI	BSD68	60	220	0.780186	29.1155
BERNOULLI	BSD68	60	230	0.747278	28.3978
BERNOULLI	BSD68	60	240	0.706155	27.1969
BERNOULLI	BSD68	39	150	0.745206	28.8959
BERNOULLI	BSD68	39	160	0.718662	28.5122
BERNOULLI	BSD68	39	170	0.693346	28.1693
BERNOULLI	BSD68	39	180	0.667122	27.946
BERNOULLI	BSD68	39	190	0.633615	27.5374
BERNOULLI	BSD68	39	200	0.596873	27.1892
BERNOULLI	BSD68	39	210	0.561049	26.8289
BERNOULLI	BSD68	39	220	0.523208	26.4927
BERNOULLI	BSD68	39	230	0.478531	26.0434
BERNOULLI	BSD68	39	240	0.42881	25.4479
BERNOULLI	BSD68	11	150	0.961203	34.341
BERNOULLI	BSD68	11	160	0.955822	33.752
BERNOULLI	BSD68	11	170	0.948334	32.9922
BERNOULLI	BSD68	11	180	0.938665	32.4643
BERNOULLI	BSD68	11	190	0.927879	31.7416
BERNOULLI	BSD68	11	200	0.909839	30.8246
BERNOULLI	BSD68	11	210	0.890713	29.998
BERNOULLI	BSD68	11	220	0.866182	29.257
BERNOULLI	BSD68	11	230	0.829878	28.1444
BERNOULLI	BSD68	11	240	0.760636	26.3479
BERNOULLI	BSD68	4	150	0.899747	29.125
BERNOULLI	BSD68	4	160	0.885534	28.495
BERNOULLI	BSD68	4	170	0.869574	27.9071
BERNOULLI	BSD68	4	180	0.854533	27.2597
BERNOULLI	BSD68	4	190	0.83073	26.6987
BERNOULLI	BSD68	4	200	0.808392	25.962
BERNOULLI	BSD68	4	210	0.779889	25.169
BERNOULLI	BSD68	4	220	0.744863	24.4377
BERNOULLI	BSD68	4	230	0.701579	23.6678
BERNOULLI	BSD68	4	240	0.634184	22.3096
BERNOULLI	BSD68	31	150	0.941663	33.2153
BERNOULLI	BSD68	31	160	0.931504	32.6191
BERNOULLI	BSD68	31	170	0.921656	31.8815
BERNOULLI	BSD68	31	180	0.908502	31.2609
BERNOULLI	BSD68	31	190	0.891286	30.4115
BERNOULLI	BSD68	31	200	0.873015	29.6617
BERNOULLI	BSD68	31	210	0.848165	28.8877
BERNOULLI	BSD68	31	220	0.818245	27.9043
BERNOULLI	BSD68	31	230	0.775888	26.8378
BERNOULLI	BSD68	31	240	0.710422	25.5181
BERNOULLI	BSD68	27	150	0.895543	27.6753
BERNOULLI	BSD68	27	160	0.880861	26.9444
BERNOULLI	BSD68	27	170	0.860752	26.298
BERNOULLI	BSD68	27	180	0.839566	25.6234
BERNOULLI	BSD68	27	190	0.811832	24.8916
BERNOULLI	BSD68	27	200	0.779339	24.1344
BERNOULLI	BSD68	27	210	0.736811	23.218
BERNOULLI	BSD68	27	220	0.687619	22.4236
BERNOULLI	BSD68	27	230	0.617203	21.3268
BERNOULLI	BSD68	27	240	0.514486	20.0062
BERNOULLI	BSD68	59	150	0.9061	33.6798
BERNOULLI	BSD68	59	160	0.894529	33.1482
BERNOULLI	BSD68	59	170	0.881816	32.731
BERNOULLI	BSD68	59	180	0.867712	32.3274
BERNOULLI	BSD68	59	190	0.85251	31.8243
BERNOULLI	BSD68	59	200	0.83292	31.2608
BERNOULLI	BSD68	59	210	0.816626	30.8304
BERNOULLI	BSD68	59	220	0.790837	30.2256
BERNOULLI	BSD68	59	230	0.762943	29.5934
BERNOULLI	BSD68	59	240	0.723759	28.8416
BERNOULLI	BSD68	37	150	0.916713	26.8923
BERNOULLI	BSD68	37	160	0.909796	26.5277
BERNOULLI	BSD68	37	170	0.895129	25.9045
BERNOULLI	BSD68	37	180	0.883382	25.4781
BERNOULLI	BSD68	37	190	0.866711	24.9253
BERNOULLI	BSD68	37	200	0.849504	24.3543
BERNOULLI	BSD68	37	210	0.828218	23.8506
BERNOULLI	BSD68	37	220	0.801089	23.189
BERNOULLI	BSD68	37	230	0.763495	22.3692
BERNOULLI	BSD68	37	240	0.700806	21.3583
BERNOULLI	BSD68	47	150	0.956027	38.0172
BERNOULLI	BSD68	47	160	0.950503	37.4494
BERNOULLI	BSD68	47	170	0.942599	36.8715
BERNOULLI	BSD68	47	180	0.934837	36.3929
BERNOULLI	BSD68	47	190	0.923633	35.5351
BERNOULLI	BSD68	47	200	0.913836	35.037
BERNOULLI	BSD68	47	210	0.895646	34.1184
BERNOULLI	BSD68	47	220	0.875681	33.1784
BERNOULLI	BSD68	47	230	0.850218	32.371
BERNOULLI	BSD68	47	240	0.8148	30.9536
BERNOULLI	BSD68	12	150	0.901793	28.3815
BERNOULLI	BSD68	12	160	0.889147	27.8616
BERNOULLI	BSD68	12	170	0.873126	27.3271
BERNOULLI	BSD68	12	180	0.851903	26.7444
BERNOULLI	BSD68	12	190	0.833322	26.3226
BERNOULLI	BSD68	12	200	0.808304	25.662
BERNOULLI	BSD68	12	210	0.778054	25.0955
BERNOULLI	BSD68	12	220	0.73721	24.3608
BERNOULLI	BSD68	12	230	0.688747	23.5847
BERNOULLI	BSD68	12	240	0.61175	22.5387
BERNOULLI	BSD68	50	150	0.921076	33.9057
BERNOULLI	BSD68	50	160	0.911297	33.2987
BERNOULLI	BSD68	50	170	0.901067	32.7039
BERNOULLI	BSD68	50	180	0.888429	32.2851
BERNOULLI	BSD68	50	190	0.877023	31.7847
BERNOULLI	BSD68	50	200	0.86008	31.1518
BERNOULLI	BSD68	50	210	0.844723	30.6974
BERNOULLI	BSD68	50	220	0.824165	30.0006
BERNOULLI	BSD68	50	230	0.797061	29.0287
BERNOULLI	BSD68	50	240	0.763737	28.0173
BERNOULLI	BSD68	65	150	0.848301	28.0037
BERNOULLI	BSD68	65	160	0.830086	27.494
BERNOULLI	BSD68	65	170	0.806803	26.9509
BERNOULLI	BSD68	65	180	0.781181	26.3862
BERNOULLI	BSD68	65	190	0.752722	25.8948
BERNOULLI	BSD68	65	200	0.718774	25.2712
BERNOULLI	BSD68	65	210	0.683573	24.7002
BERNOULLI	BSD68	65	220	0.633792	24.0003
BERNOULLI	BSD68	65	230	0.576189	23.0583
BERNOULLI	BSD68	65	240	0.49976	22.1315
BERNOULLI	BSD68	42	150	0.983511	38.6392
BERNOULLI	BSD68	42	160	0.981797	37.9794
BERNOULLI	BSD68	42	170	0.978977	37.487
BERNOULLI	BSD68	42	180	0.976087	36.6114
BERNOULLI	BSD68	42	190	0.971269	35.652
BERNOULLI	BSD68	42	200	0.965416	34.3603
BERNOULLI	BSD68	42	210	0.954491	32.5536
BERNOULLI	BSD68	42	220	0.941303	31.1952
BERNOULLI	BSD68	42	230	0.910664	29.1988
BERNOULLI	BSD68	42	240	0.853811	26.6528
BERNOULLI	BSD68	40	150	0.884428	29.9503
BERNOULLI	BSD68	40	160	0.865676	29.1832
BERNOULLI	BSD68	40	170	0.84807	28.7196
BERNOULLI	BSD68	40	180	0.83611	28.435
BERNOULLI	BSD68	40	190	0.813686	27.8866
BERNOULLI	BSD68	40	200	0.790639	27.2492
BERNOULLI	BSD68	40	210	0.762529	26.5477
BERNOULLI	BSD68	40	220	0.729942	26.1175
BERNOULLI	BSD68	40	230	0.692095	25.2985
BERNOULLI	BSD68	40	240	0.633597	24.1545
BERNOULLI	BSD68	64	150	0.9016	26.7692
BERNOULLI	BSD68	64	160	0.887344	26.1975
BERNOULLI	BSD68	64	170	0.870107	25.6554
BERNOULLI	BSD68	64	180	0.853233	25.2099
BERNOULLI	BSD68	64	190	0.824048	24.4522
BERNOULLI	BSD68	64	200	0.796716	23.9903
BERNOULLI	BSD68	64	210	0.755838	23.2182
BERNOULLI	BSD68	64	220	0.710273	22.4911
BERNOULLI	BSD68	64	230	0.640148	21.5439
BERNOULLI	BSD68	64	240	0.536756	20.4545
BERNOULLI	BSD68	2	150	0.954382	36.7012
BERNOULLI	BSD68	2	160	0.948823	36.1494
BERNOULLI	BSD68	2	170	0.94215	35.5114
BERNOULLI	BSD68	2	180	0.934897	35.0923
BERNOULLI	BSD68	2	190	0.925402	34.1978
BERNOULLI	BSD68	2	200	0.915645	33.7232
BERNOULLI	BSD68	2	210	0.901522	32.9788
BERNOULLI	BSD68	2	220	0.886502	32.2443
BERNOULLI	BSD68	2	230	0.861583	31.1564
BERNOULLI	BSD68	2	240	0.823683	29.8235
BERNOULLI	BSD68	14	150	0.939021	30.07
BERNOULLI	BSD68	14	160	0.930032	29.7215
BERNOULLI	BSD68	14	170	0.918899	28.9508
BERNOULLI	BSD68	14	180	0.901976	28.0898
BERNOULLI	BSD68	14	190	0.880766	27.3071
BERNOULLI	BSD68	14	200	0.857925	26.5341
BERNOULLI	BSD68	14	210	0.827454	25.6038
BERNOULLI	BSD68	14	220	0.785588	24.7355
BERNOULLI	BSD68	14	230	0.723778	23.5093
BERNOULLI	BSD68	14	240	0.630861	22.1364
BERNOULLI	BSD68	24	150	0.88404	27.7038
BERNOULLI	BSD68	24	160	0.869629	27.2938
BERNOULLI	BSD68	24	170	0.855838	26.8064
BERNOULLI	BSD68	24	180	0.839314	26.3363
BERNOULLI	BSD68	24	190	0.821424	25.851
BERNOULLI	BSD68	24	200	0.796801	25.1701
BERNOULLI	BSD68	24	210	0.771862	24.6527
BERNOULLI	BSD68	24	220	0.738069	23.9545
BERNOULLI	BSD68	24	230	0.698711	23.0078
BERNOULLI	BSD68	24	240	0.640421	22.0685
BERNOULLI	Set12	10	150	0.911355	32.5945
BERNOULLI	Set12	10	160	0.9039	32.2118
BERNOULLI	Set12	10	170	0.894241	31.5773
BERNOULLI	Set12	10	180	0.881298	30.8247
BERNOULLI	Set12	10	190	0.868071	30.1671
BERNOULLI	Set12	10	200	0.848995	29.3234
BERNOULLI	Set12	10	210	0.824809	28.3236
BERNOULLI	Set12	10	220	0.7942	27.1773
BERNOULLI	Set12	10	230	0.746712	25.8562
BERNOULLI	Set12	10	240	0.681494	24.6517
BERNOULLI	Set12	12	150	0.932968	32.7094
BERNOULLI	Set12	12	160	0.92408	32.1339
BERNOULLI	Set12	12	170	0.914003	31.4927
BERNOULLI	Set12	12	180	0.900808	30.6623
BERNOULLI	Set12	12	190	0.885542	29.8868
BERNOULLI	Set12	12	200	0.869006	29.1741
BERNOULLI	Set12	12	210	0.841923	28.1045
BERNOULLI	Set12	12	220	0.809399	27.1439
BERNOULLI	Set12	12	230	0.761728	25.9608
BERNOULLI	Set12	12	240	0.678766	24.3193
BERNOULLI	Set12	1	150	0.923121	29.2152
BERNOULLI	Set12	1	160	0.912259	28.1834
BERNOULLI	Set12	1	170	0.904184	27.9079
BERNOULLI	Set12	1	180	0.890497	27.2373
BERNOULLI	Set12	1	190	0.878957	26.3703
BERNOULLI	Set12	1	200	0.860178	25.5697
BERNOULLI	Set12	1	210	0.836001	24.6619
BERNOULLI	Set12	1	220	0.812586	23.6738
BERNOULLI	Set12	1	230	0.782191	22.9921
BERNOULLI	Set12	1	240	0.712762	21.0561
BERNOULLI	Set12	4	150	0.952884	31.9313
BERNOULLI	Set12	4	160	0.942433	30.8602
BERNOULLI	Set12	4	170	0.935011	30.3186
BERNOULLI	Set12	4	180	0.920749	29.1062
BERNOULLI	Set12	4	190	0.905946	28.2801
BERNOULLI	Set12	4	200	0.884729	27.2809
BERNOULLI	Set12	4	210	0.860241	26.0441
BERNOULLI	Set12	4	220	0.825451	24.9831
BERNOULLI	Set12	4	230	0.777802	23.6104
BERNOULLI	Set12	4	240	0.686067	21.8732
BERNOULLI	Set12	3	150	0.943845	25.152
BERNOULLI	Set12	3	160	0.936772	25.0007
BERNOULLI	Set12	3	170	0.931778	24.8838
BERNOULLI	Set12	3	180	0.925393	24.8083
BERNOULLI	Set12	3	190	0.915989	24.6336
BERNOULLI	Set12	3	200	0.90317	24.3228
BERNOULLI	Set12	3	210	0.89145	24.118
BERNOULLI	Set12	3	220	0.869681	23.4799
BERNOULLI	Set12	3	230	0.837488	22.8997
BERNOULLI	Set12	3	240	0.780656	21.7494
BERNOULLI	Set12	9	150	0.933227	29.9841
BERNOULLI	Set12	9	160	0.921931	29.218
BERNOULLI	Set12	9	170	0.90735	28.4639
BERNOULLI	Set12	9	180	0.889578	27.589
BERNOULLI	Set12	9	190	0.869588	26.7925
BERNOULLI	Set12	9	200	0.842715	25.9179
BERNOULLI	Set12	9	210	0.80977	25.1419
BERNOULLI	Set12	9	220	0.774796	24.4294
BERNOULLI	Set12	9	230	0.726283	23.6401
BERNOULLI	Set12	9	240	0.669296	22.6425
BERNOULLI	Set12	6	150	0.923856	28.5063
BERNOULLI	Set12	6	160	0.913642	27.8316
BERNOULLI	Set12	6	170	0.906845	27.4066
BERNOULLI	Set12	6	180	0.893129	26.6444
BERNOULLI	Set12	6	190	0.877249	25.8741
BERNOULLI	Set12	6	200	0.860811	25.1773
BERNOULLI	Set12	6	210	0.842094	24.7617
BERNOULLI	Set12	6	220	0.806219	23.4601
BERNOULLI	Set12	6	230	0.775001	22.4884
BERNOULLI	Set12	6	240	0.712582	21.019
BERNOULLI	Set12	5	150	0.96828	31.8444
BERNOULLI	Set12	5	160	0.964277	31.3598
BERNOULLI	Set12	5	170	0.957093	30.0086
BERNOULLI	Set12	5	180	0.950865	29.4919
BERNOULLI	Set12	5	190	0.944021	28.6817
BERNOULLI	Set12	5	200	0.933451	27.6632
BERNOULLI	Set12	5	210	0.912286	26.4063
BERNOULLI	Set12	5	220	0.893648	25.2155
BERNOULLI	Set12	5	230	0.852204	23.4882
BERNOULLI	Set12	5	240	0.768986	20.9655
BERNOULLI	Set12	11	150	0.935962	32.9938
BERNOULLI	Set12	11	160	0.926897	32.433
BERNOULLI	Set12	11	170	0.915666	31.7895
BERNOULLI	Set12	11	180	0.904184	31.1121
BERNOULLI	Set12	11	190	0.88864	30.4157
BERNOULLI	Set12	11	200	0.871563	29.7182
BERNOULLI	Set12	11	210	0.844866	28.8145
BERNOULLI	Set12	11	220	0.817209	27.9812
BERNOULLI	Set12	11	230	0.775741	26.8908
BERNOULLI	Set12	11	240	0.706885	25.3265
BERNOULLI	Set12	2	150	0.940838	36.7029
BERNOULLI	Set12	2	160	0.934979	36.061
BERNOULLI	Set12	2	170	0.927556	35.5809
BERNOULLI	Set12	2	180	0.919508	34.9667
BERNOULLI	Set12	2	190	0.905557	33.5122
BERNOULLI	Set12	2	200	0.900147	33.2867
BERNOULLI	Set12	2	210	0.883149	32.0924
BERNOULLI	Set12	2	220	0.865058	30.4384
BERNOULLI	Set12	2	230	0.84268	29.4169
BERNOULLI	Set12	2	240	0.800624	26.3772
BERNOULLI	Set12	7	150	0.935847	28.6563
BERNOULLI	Set12	7	160	0.928965	27.9228
BERNOULLI	Set12	7	170	0.918027	27.2884
BERNOULLI	Set12	7	180	0.911871	27.0385
BERNOULLI	Set12	7	190	0.892499	25.7227
BERNOULLI	Set12	7	200	0.882138	25.3499
BERNOULLI	Set12	7	210	0.860482	24.0702
BERNOULLI	Set12	7	220	0.83949	23.3493
BERNOULLI	Set12	7	230	0.801411	21.8291
BERNOULLI	Set12	7	240	0.744238	20.1673
BERNOULLI	Set12	8	150	0.947004	36.1471
BERNOULLI	Set12	8	160	0.941724	35.6189
BERNOULLI	Set12	8	170	0.934988	34.9257
BERNOULLI	Set12	8	180	0.927825	34.2476
BERNOULLI	Set12	8	190	0.91903	33.4963
BERNOULLI	Set12	8	200	0.909962	32.7807
BERNOULLI	Set12	8	210	0.895145	31.5259
BERNOULLI	Set12	8	220	0.877788	30.6502
BERNOULLI	Set12	8	230	0.8508	29.2694
BERNOULLI	Set12	8	240	0.806824	27.4013
BERNOULLI	Urban100	img_079_SRF_2_HR	150	0.934234	29.2946
BERNOULLI	Urban100	img_079_SRF_2_HR	160	0.923296	28.6121
BERNOULLI	Urban100	img_079_SRF_2_HR	170	0.911436	27.9651
BERNOULLI	Urban100	img_079_SRF_2_HR	180	0.895006	27.2913
BERNOULLI	Urban100	img_079_SRF_2_HR	190	0.877614	26.6577
BERNOULLI	Urban100	img_079_SRF_2_HR	200	0.855027	25.9239
BERNOULLI	Urban100	img_079_SRF_2_HR	210	0.824435	25.0896
BERNOULLI	Urban100	img_079_SRF_2_HR	220	0.786127	24.1481
BERNOULLI	Urban100	img_079_SRF_2_HR	230	0.727298	23.0669
BERNOULLI	Urban100	img_079_SRF_2_HR	240	0.628001	21.5192
BERNOULLI	Urban100	img_013_SRF_2_HR	150	0.951279	31.0817
BERNOULLI	Urban100	img_013_SRF_2_HR	160	0.943566	30.3208
BERNOULLI	Urban100	img_013_SRF_2_HR	170	0.934264	29.7896
BERNOULLI	Urban100	img_013_SRF_2_HR	180	0.922911	28.9757
BERNOULLI	Urban100	img_013_SRF_2_HR	190	0.908087	27.8548
BERNOULLI	Urban100	img_013_SRF_2_HR	200	0.891212	27.1252
BERNOULLI	Urban100	img_013_SRF_2_HR	210	0.866463	25.9824
BERNOULLI	Urban100	img_013_SRF_2_HR	220	0.826296	24.6963
BERNOULLI	Urban100	img_013_SRF_2_HR	230	0.779706	23.6867
BERNOULLI	Urban100	img_013_SRF_2_HR	240	0.684217	21.7577
BERNOULLI	Urban100	img_084_SRF_2_HR	150	0.943915	31.2447
BERNOULLI	Urban100	img_084_SRF_2_HR	160	0.933677	30.5222
BERNOULLI	Urban100	img_084_SRF_2_HR	170	0.922327	29.7528
BERNOULLI	Urban100	img_084_SRF_2_HR	180	0.90935	29.0954
BERNOULLI	Urban100	img_084_SRF_2_HR	190	0.891006	28.1226
BERNOULLI	Urban100	img_084_SRF_2_HR	200	0.86986	27.2745
BERNOULLI	Urban100	img_084_SRF_2_HR	210	0.836696	26.2704
BERNOULLI	Urban100	img_084_SRF_2_HR	220	0.797344	25.2549
BERNOULLI	Urban100	img_084_SRF_2_HR	230	0.726374	23.8541
BERNOULLI	Urban100	img_084_SRF_2_HR	240	0.617394	22.2384
BERNOULLI	Urban100	img_096_SRF_2_HR	150	0.960199	29.3438
BERNOULLI	Urban100	img_096_SRF_2_HR	160	0.953699	28.5347
BERNOULLI	Urban100	img_096_SRF_2_HR	170	0.946047	27.8386
BERNOULLI	Urban100	img_096_SRF_2_HR	180	0.934298	27.0597
BERNOULLI	Urban100	img_096_SRF_2_HR	190	0.920211	26.0917
BERNOULLI	Urban100	img_096_SRF_2_HR	200	0.902053	25.151
BERNOULLI	Urban100	img_096_SRF_2_HR	210	0.87453	24.0522
BERNOULLI	Urban100	img_096_SRF_2_HR	220	0.836013	23.046
BERNOULLI	Urban100	img_096_SRF_2_HR	230	0.773027	21.4712
BERNOULLI	Urban100	img_096_SRF_2_HR	240	0.658575	19.7219
BERNOULLI	Urban100	img_034_SRF_2_HR	150	0.867175	26.7238
BERNOULLI	Urban100	img_034_SRF_2_HR	160	0.850118	25.9689
BERNOULLI	Urban100	img_034_SRF_2_HR	170	0.831824	25.4058
BERNOULLI	Urban100	img_034_SRF_2_HR	180	0.809844	24.6166
BERNOULLI	Urban100	img_034_SRF_2_HR	190	0.786147	23.914
BERNOULLI	Urban100	img_034_SRF_2_HR	200	0.754658	23.2102
BERNOULLI	Urban100	img_034_SRF_2_HR	210	0.71719	22.2483
BERNOULLI	Urban100	img_034_SRF_2_HR	220	0.67281	21.4195
BERNOULLI	Urban100	img_034_SRF_2_HR	230	0.6	20.1311
BERNOULLI	Urban100	img_034_SRF_2_HR	240	0.50703	18.7488
BERNOULLI	Urban100	img_099_SRF_2_HR	150	0.792608	26.0223
BERNOULLI	Urban100	img_099_SRF_2_HR	160	0.774944	24.9967
BERNOULLI	Urban100	img_099_SRF_2_HR	170	0.757461	23.719
BERNOULLI	Urban100	img_099_SRF_2_HR	180	0.735027	22.0598
BERNOULLI	Urban100	img_099_SRF_2_HR	190	0.709714	20.1046
BERNOULLI	Urban100	img_099_SRF_2_HR	200	0.67028	18.2019
BERNOULLI	Urban100	img_099_SRF_2_HR	210	0.633835	17.2556
BERNOULLI	Urban100	img_099_SRF_2_HR	220	0.577667	16.9001
BERNOULLI	Urban100	img_099_SRF_2_HR	230	0.511939	16.7909
BERNOULLI	Urban100	img_099_SRF_2_HR	240	0.42164	15.7379
BERNOULLI	Urban100	img_024_SRF_2_HR	150	0.942268	25.1772
BERNOULLI	Urban100	img_024_SRF_2_HR	160	0.933848	24.6852
BERNOULLI	Urban100	img_024_SRF_2_HR	170	0.921603	23.928
BERNOULLI	Urban100	img_024_SRF_2_HR	180	0.900585	23.2159
BERNOULLI	Urban100	img_024_SRF_2_HR	190	0.881068	22.2669
BERNOULLI	Urban100	img_024_SRF_2_HR	200	0.858567	21.4229
BERNOULLI	Urban100	img_024_SRF_2_HR	210	0.819374	20.3351
BERNOULLI	Urban100	img_024_SRF_2_HR	220	0.765698	19.2718
BERNOULLI	Urban100	img_024_SRF_2_HR	230	0.6805	17.6648
BERNOULLI	Urban100	img_024_SRF_2_HR	240	0.536046	16.2551
BERNOULLI	Urban100	img_019_SRF_2_HR	150	0.900375	21.882
BERNOULLI	Urban100	img_019_SRF_2_HR	160	0.886648	21.4214
BERNOULLI	Urban100	img_019_SRF_2_HR	170	0.870503	20.7498
BERNOULLI	Urban100	img_019_SRF_2_HR	180	0.847886	19.7633
BERNOULLI	Urban100	img_019_SRF_2_HR	190	0.827064	19.2677
BERNOULLI	Urban100	img_019_SRF_2_HR	200	0.800726	18.6557
BERNOULLI	Urban100	img_019_SRF_2_HR	210	0.767096	17.9247
BERNOULLI	Urban100	img_019_SRF_2_HR	220	0.72652	17.3002
BERNOULLI	Urban100	img_019_SRF_2_HR	230	0.670927	16.6058
BERNOULLI	Urban100	img_019_SRF_2_HR	240	0.59059	15.5721
BERNOULLI	Urban100	img_074_SRF_2_HR	150	0.903474	28.1935
BERNOULLI	Urban100	img_074_SRF_2_HR	160	0.887511	27.6308
BERNOULLI	Urban100	img_074_SRF_2_HR	170	0.870707	27.0898
BERNOULLI	Urban100	img_074_SRF_2_HR	180	0.848237	26.3795
BERNOULLI	Urban100	img_074_SRF_2_HR	190	0.819258	25.6871
BERNOULLI	Urban100	img_074_SRF_2_HR	200	0.781932	24.9972
BERNOULLI	Urban100	img_074_SRF_2_HR	210	0.749994	24.3783
BERNOULLI	Urban100	img_074_SRF_2_HR	220	0.69844	23.5468
BERNOULLI	Urban100	img_074_SRF_2_HR	230	0.652019	22.9064
BERNOULLI	Urban100	img_074_SRF_2_HR	240	0.579543	21.9386
BERNOULLI	Urban100	img_053_SRF_2_HR	150	0.939893	26.0391
BERNOULLI	Urban100	img_053_SRF_2_HR	160	0.929721	25.4072
BERNOULLI	Urban100	img_053_SRF_2_HR	170	0.914941	24.4041
BERNOULLI	Urban100	img_053_SRF_2_HR	180	0.900592	23.8871
BERNOULLI	Urban100	img_053_SRF_2_HR	190	0.877729	22.9147
BERNOULLI	Urban100	img_053_SRF_2_HR	200	0.855324	22.1202
BERNOULLI	Urban100	img_053_SRF_2_HR	210	0.818679	21.0001
BERNOULLI	Urban100	img_053_SRF_2_HR	220	0.773421	19.9559
BERNOULLI	Urban100	img_053_SRF_2_HR	230	0.702588	18.5941
BERNOULLI	Urban100	img_053_SRF_2_HR	240	0.591756	17.1153
BERNOULLI	Urban100	img_065_SRF_2_HR	150	0.948307	30.6089
BERNOULLI	Urban100	img_065_SRF_2_HR	160	0.939881	29.8533
BERNOULLI	Urban100	img_065_SRF_2_HR	170	0.927683	29.1099
BERNOULLI	Urban100	img_065_SRF_2_HR	180	0.915124	28.3801
BERNOULLI	Urban100	img_065_SRF_2_HR	190	0.896835	27.4989
BERNOULLI	Urban100	img_065_SRF_2_HR	200	0.874902	26.6498
BERNOULLI	Urban100	img_065_SRF_2_HR	210	0.843891	25.6753
BERNOULLI	Urban100	img_065_SRF_2_HR	220	0.8009	24.5976
BERNOULLI	Urban100	img_065_SRF_2_HR	230	0.725938	23.1047
BERNOULLI	Urban100	img_065_SRF_2_HR	240	0.600021	21.3522
BERNOULLI	Urban100	img_081_SRF_2_HR	150	0.926148	32.4105
BERNOULLI	Urban100	img_081_SRF_2_HR	160	0.920166	31.6102
BERNOULLI	Urban100	img_081_SRF_2_HR	170	0.913595	30.6129
BERNOULLI	Urban100	img_081_SRF_2_HR	180	0.903968	29.5714
BERNOULLI	Urban100	img_081_SRF_2_HR	190	0.892064	28.473
BERNOULLI	Urban100	img_081_SRF_2_HR	200	0.879781	27.3665
BERNOULLI	Urban100	img_081_SRF_2_HR	210	0.859487	25.9545
BERNOULLI	Urban100	img_081_SRF_2_HR	220	0.835099	24.4984
BERNOULLI	Urban100	img_081_SRF_2_HR	230	0.792513	22.7824
BERNOULLI	Urban100	img_081_SRF_2_HR	240	0.717666	20.4292
BERNOULLI	Urban100	img_088_SRF_2_HR	150	0.86743	23.3504
BERNOULLI	Urban100	img_088_SRF_2_HR	160	0.849777	22.8776
BERNOULLI	Urban100	img_088_SRF_2_HR	170	0.826436	22.1749
BERNOULLI	Urban100	img_088_SRF_2_HR	180	0.804821	21.7929
BERNOULLI	Urban100	img_088_SRF_2_HR	190	0.774927	21.1931
BERNOULLI	Urban100	img_088_SRF_2_HR	200	0.736256	20.5395
BERNOULLI	Urban100	img_088_SRF_2_HR	210	0.690958	19.8262
BERNOULLI	Urban100	img_088_SRF_2_HR	220	0.637293	19.0618
BERNOULLI	Urban100	img_088_SRF_2_HR	230	0.562664	18.1844
BERNOULLI	Urban100	img_088_SRF_2_HR	240	0.448324	17.0697
BERNOULLI	Urban100	img_016_SRF_2_HR	150	0.675251	26.7734
BERNOULLI	Urban100	img_016_SRF_2_HR	160	0.669858	25.281
BERNOULLI	Urban100	img_016_SRF_2_HR	170	0.664961	23.5096
BERNOULLI	Urban100	img_016_SRF_2_HR	180	0.658841	20.4704
BERNOULLI	Urban100	img_016_SRF_2_HR	190	0.652465	18.1528
BERNOULLI	Urban100	img_016_SRF_2_HR	200	0.643948	16.121
BERNOULLI	Urban100	img_016_SRF_2_HR	210	0.636662	14.6667
BERNOULLI	Urban100	img_016_SRF_2_HR	220	0.61779	13.4866
BERNOULLI	Urban100	img_016_SRF_2_HR	230	0.5918	12.8875
BERNOULLI	Urban100	img_016_SRF_2_HR	240	0.539605	12.4562
BERNOULLI	Urban100	img_017_SRF_2_HR	150	0.952164	28.8533
BERNOULLI	Urban100	img_017_SRF_2_HR	160	0.943661	28.1278
BERNOULLI	Urban100	img_017_SRF_2_HR	170	0.933309	27.3534
BERNOULLI	Urban100	img_017_SRF_2_HR	180	0.920105	26.5469
BERNOULLI	Urban100	img_017_SRF_2_HR	190	0.903285	25.6054
BERNOULLI	Urban100	img_017_SRF_2_HR	200	0.883627	24.7924
BERNOULLI	Urban100	img_017_SRF_2_HR	210	0.86121	24.0835
BERNOULLI	Urban100	img_017_SRF_2_HR	220	0.82097	22.9591
BERNOULLI	Urban100	img_017_SRF_2_HR	230	0.764158	21.6062
BERNOULLI	Urban100	img_017_SRF_2_HR	240	0.676323	20.0618
BERNOULLI	Urban100	img_059_SRF_2_HR	150	0.92756	27.754
BERNOULLI	Urban100	img_059_SRF_2_HR	160	0.916859	27.2519
BERNOULLI	Urban100	img_059_SRF_2_HR	170	0.904748	26.6253
BERNOULLI	Urban100	img_059_SRF_2_HR	180	0.891815	26.0045
BERNOULLI	Urban100	img_059_SRF_2_HR	190	0.874567	25.4469
BERNOULLI	Urban100	img_059_SRF_2_HR	200	0.852984	24.6578
BERNOULLI	Urban100	img_059_SRF_2_HR	210	0.822242	23.9631
BERNOULLI	Urban100	img_059_SRF_2_HR	220	0.790546	23.312
BERNOULLI	Urban100	img_059_SRF_2_HR	230	0.738576	22.2751
BERNOULLI	Urban100	img_059_SRF_2_HR	240	0.681296	21.4454
BERNOULLI	Urban100	img_066_SRF_2_HR	150	0.923618	27.8511
BERNOULLI	Urban100	img_066_SRF_2_HR	160	0.912856	27.2233
BERNOULLI	Urban100	img_066_SRF_2_HR	170	0.900229	26.6404
BERNOULLI	Urban100	img_066_SRF_2_HR	180	0.88099	25.835
BERNOULLI	Urban100	img_066_SRF_2_HR	190	0.863821	25.2744
BERNOULLI	Urban100	img_066_SRF_2_HR	200	0.840788	24.5694
BERNOULLI	Urban100	img_066_SRF_2_HR	210	0.807574	23.7052
BERNOULLI	Urban100	img_066_SRF_2_HR	220	0.769783	22.9046
BERNOULLI	Urban100	img_066_SRF_2_HR	230	0.711067	21.8904
BERNOULLI	Urban100	img_066_SRF_2_HR	240	0.614201	20.4907
BERNOULLI	Urban100	img_078_SRF_2_HR	150	0.888071	28.4542
BERNOULLI	Urban100	img_078_SRF_2_HR	160	0.872018	27.925
BERNOULLI	Urban100	img_078_SRF_2_HR	170	0.856331	27.2312
BERNOULLI	Urban100	img_078_SRF_2_HR	180	0.838081	26.697
BERNOULLI	Urban100	img_078_SRF_2_HR	190	0.81787	26.2212
BERNOULLI	Urban100	img_078_SRF_2_HR	200	0.789675	25.5184
BERNOULLI	Urban100	img_078_SRF_2_HR	210	0.75816	25.1406
BERNOULLI	Urban100	img_078_SRF_2_HR	220	0.719064	24.3392
BERNOULLI	Urban100	img_078_SRF_2_HR	230	0.664191	23.6922
BERNOULLI	Urban100	img_078_SRF_2_HR	240	0.589956	22.6879
BERNOULLI	Urban100	img_073_SRF_2_HR	150	0.861182	24.1074
BERNOULLI	Urban100	img_073_SRF_2_HR	160	0.843408	23.5692
BERNOULLI	Urban100	img_073_SRF_2_HR	170	0.819847	22.9369
BERNOULLI	Urban100	img_073_SRF_2_HR	180	0.792896	22.3948
BERNOULLI	Urban100	img_073_SRF_2_HR	190	0.76272	21.8113
BERNOULLI	Urban100	img_073_SRF_2_HR	200	0.727773	21.2079
BERNOULLI	Urban100	img_073_SRF_2_HR	210	0.675775	20.5248
BERNOULLI	Urban100	img_073_SRF_2_HR	220	0.615053	19.8211
BERNOULLI	Urban100	img_073_SRF_2_HR	230	0.525646	18.8405
BERNOULLI	Urban100	img_073_SRF_2_HR	240	0.392993	17.63
BERNOULLI	Urban100	img_067_SRF_2_HR	150	0.912432	21.5246
BERNOULLI	Urban100	img_067_SRF_2_HR	160	0.902719	20.9455
BERNOULLI	Urban100	img_067_SRF_2_HR	170	0.887789	20.2335
BERNOULLI	Urban100	img_067_SRF_2_HR	180	0.869529	19.5111
BERNOULLI	Urban100	img_067_SRF_2_HR	190	0.850333	18.8746
BERNOULLI	Urban100	img_067_SRF_2_HR	200	0.825334	18.2715
BERNOULLI	Urban100	img_067_SRF_2_HR	210	0.788376	17.1736
BERNOULLI	Urban100	img_067_SRF_2_HR	220	0.736013	16.0739
BERNOULLI	Urban100	img_067_SRF_2_HR	230	0.668481	14.8717
BERNOULLI	Urban100	img_067_SRF_2_HR	240	0.544059	13.2427
BERNOULLI	Urban100	img_033_SRF_2_HR	150	0.929904	31.4434
BERNOULLI	Urban100	img_033_SRF_2_HR	160	0.919133	30.6434
BERNOULLI	Urban100	img_033_SRF_2_HR	170	0.909061	30.0958
BERNOULLI	Urban100	img_033_SRF_2_HR	180	0.89589	29.3949
BERNOULLI	Urban100	img_033_SRF_2_HR	190	0.87659	28.5269
BERNOULLI	Urban100	img_033_SRF_2_HR	200	0.855634	27.7014
BERNOULLI	Urban100	img_033_SRF_2_HR	210	0.830767	26.9132
BERNOULLI	Urban100	img_033_SRF_2_HR	220	0.785823	25.5372
BERNOULLI	Urban100	img_033_SRF_2_HR	230	0.728782	24.1683
BERNOULLI	Urban100	img_033_SRF_2_HR	240	0.648124	22.6337
BERNOULLI	Urban100	img_087_SRF_2_HR	150	0.968712	30.0828
BERNOULLI	Urban100	img_087_SRF_2_HR	160	0.963394	29.4801
BERNOULLI	Urban100	img_087_SRF_2_HR	170	0.957049	28.7379
BERNOULLI	Urban100	img_087_SRF_2_HR	180	0.946101	27.5073
BERNOULLI	Urban100	img_087_SRF_2_HR	190	0.93514	26.8553
BERNOULLI	Urban100	img_087_SRF_2_HR	200	0.920067	26.0001
BERNOULLI	Urban100	img_087_SRF_2_HR	210	0.899294	24.8516
BERNOULLI	Urban100	img_087_SRF_2_HR	220	0.861373	23.3113
BERNOULLI	Urban100	img_087_SRF_2_HR	230	0.81164	21.8815
BERNOULLI	Urban100	img_087_SRF_2_HR	240	0.72222	20.0803
BERNOULLI	Urban100	img_100_SRF_2_HR	150	0.925658	27.683
BERNOULLI	Urban100	img_100_SRF_2_HR	160	0.919545	28.0525
BERNOULLI	Urban100	img_100_SRF_2_HR	170	0.911816	28.186
BERNOULLI	Urban100	img_100_SRF_2_HR	180	0.901168	27.8955
BERNOULLI	Urban100	img_100_SRF_2_HR	190	0.88725	26.909
BERNOULLI	Urban100	img_100_SRF_2_HR	200	0.870395	25.9805
BERNOULLI	Urban100	img_100_SRF_2_HR	210	0.847237	24.7733
BERNOULLI	Urban100	img_100_SRF_2_HR	220	0.819689	23.4626
BERNOULLI	Urban100	img_100_SRF_2_HR	230	0.769636	21.7432
BERNOULLI	Urban100	img_100_SRF_2_HR	240	0.682808	19.4357
BERNOULLI	Urban100	img_049_SRF_2_HR	150	0.926142	25.1162
BERNOULLI	Urban100	img_049_SRF_2_HR	160	0.916183	24.5534
BERNOULLI	Urban100	img_049_SRF_2_HR	170	0.899685	23.6656
BERNOULLI	Urban100	img_049_SRF_2_HR	180	0.882229	22.8896
BERNOULLI	Urban100	img_049_SRF_2_HR	190	0.861149	22.0026
BERNOULLI	Urban100	img_049_SRF_2_HR	200	0.833027	21.2723
BERNOULLI	Urban100	img_049_SRF_2_HR	210	0.793804	20.1295
BERNOULLI	Urban100	img_049_SRF_2_HR	220	0.745232	19.0682
BERNOULLI	Urban100	img_049_SRF_2_HR	230	0.669712	17.9039
BERNOULLI	Urban100	img_049_SRF_2_HR	240	0.539003	16.2872
BERNOULLI	Urban100	img_085_SRF_2_HR	150	0.967093	30.433
BERNOULLI	Urban100	img_085_SRF_2_HR	160	0.962645	29.9043
BERNOULLI	Urban100	img_085_SRF_2_HR	170	0.954783	29.0047
BERNOULLI	Urban100	img_085_SRF_2_HR	180	0.947568	28.3015
BERNOULLI	Urban100	img_085_SRF_2_HR	190	0.939356	27.6406
BERNOULLI	Urban100	img_085_SRF_2_HR	200	0.929208	26.8813
BERNOULLI	Urban100	img_085_SRF_2_HR	210	0.913743	25.9615
BERNOULLI	Urban100	img_085_SRF_2_HR	220	0.890821	24.8067
BERNOULLI	Urban100	img_085_SRF_2_HR	230	0.857936	23.7149
BERNOULLI	Urban100	img_085_SRF_2_HR	240	0.803457	22.0903
BERNOULLI	Urban100	img_070_SRF_2_HR	150	0.891239	28.1783
BERNOULLI	Urban100	img_070_SRF_2_HR	160	0.877114	27.6724
BERNOULLI	Urban100	img_070_SRF_2_HR	170	0.861056	27.0756
BERNOULLI	Urban100	img_070_SRF_2_HR	180	0.845109	26.5962
BERNOULLI	Urban100	img_070_SRF_2_HR	190	0.824335	26.0451
BERNOULLI	Urban100	img_070_SRF_2_HR	200	0.796835	25.2385
BERNOULLI	Urban100	img_070_SRF_2_HR	210	0.767489	24.6729
BERNOULLI	Urban100	img_070_SRF_2_HR	220	0.730924	23.9647
BERNOULLI	Urban100	img_070_SRF_2_HR	230	0.677816	23.0104
BERNOULLI	Urban100	img_070_SRF_2_HR	240	0.593994	21.8088
BERNOULLI	Urban100	img_038_SRF_2_HR	150	0.893796	31.0163
BERNOULLI	Urban100	img_038_SRF_2_HR	160	0.875183	30.334
BERNOULLI	Urban100	img_038_SRF_2_HR	170	0.856746	29.7544
BERNOULLI	Urban100	img_038_SRF_2_HR	180	0.830862	29.0498
BERNOULLI	Urban100	img_038_SRF_2_HR	190	0.800559	28.3178
BERNOULLI	Urban100	img_038_SRF_2_HR	200	0.765466	27.6144
BERNOULLI	Urban100	img_038_SRF_2_HR	210	0.720539	26.8924
BERNOULLI	Urban100	img_038_SRF_2_HR	220	0.664017	26.0258
BERNOULLI	Urban100	img_038_SRF_2_HR	230	0.593012	25.0521
BERNOULLI	Urban100	img_038_SRF_2_HR	240	0.496823	23.885
BERNOULLI	Urban100	img_052_SRF_2_HR	150	0.9631	31.434
BERNOULLI	Urban100	img_052_SRF_2_HR	160	0.954143	30.3641
BERNOULLI	Urban100	img_052_SRF_2_HR	170	0.948452	29.779
BERNOULLI	Urban100	img_052_SRF_2_HR	180	0.939566	29.0112
BERNOULLI	Urban100	img_052_SRF_2_HR	190	0.9251	27.944
BERNOULLI	Urban100	img_052_SRF_2_HR	200	0.905274	26.7072
BERNOULLI	Urban100	img_052_SRF_2_HR	210	0.880882	25.7335
BERNOULLI	Urban100	img_052_SRF_2_HR	220	0.844406	24.1305
BERNOULLI	Urban100	img_052_SRF_2_HR	230	0.781365	22.258
BERNOULLI	Urban100	img_052_SRF_2_HR	240	0.695645	20.3785
BERNOULLI	Urban100	img_060_SRF_2_HR	150	0.89986	27.4465
BERNOULLI	Urban100	img_060_SRF_2_HR	160	0.889003	26.9955
BERNOULLI	Urban100	img_060_SRF_2_HR	170	0.871908	26.3814
BERNOULLI	Urban100	img_060_SRF_2_HR	180	0.850789	25.6343
BERNOULLI	Urban100	img_060_SRF_2_HR	190	0.826073	24.9724
BERNOULLI	Urban100	img_060_SRF_2_HR	200	0.796489	24.2975
BERNOULLI	Urban100	img_060_SRF_2_HR	210	0.754879	23.3605
BERNOULLI	Urban100	img_060_SRF_2_HR	220	0.707195	22.5015
BERNOULLI	Urban100	img_060_SRF_2_HR	230	0.63742	21.4735
BERNOULLI	Urban100	img_060_SRF_2_HR	240	0.529551	20.1115
BERNOULLI	Urban100	img_029_SRF_2_HR	150	0.930713	28.3643
BERNOULLI	Urban100	img_029_SRF_2_HR	160	0.920623	27.7775
BERNOULLI	Urban100	img_029_SRF_2_HR	170	0.905395	26.9607
BERNOULLI	Urban100	img_029_SRF_2_HR	180	0.891865	26.151
BERNOULLI	Urban100	img_029_SRF_2_HR	190	0.871311	25.3516
BERNOULLI	Urban100	img_029_SRF_2_HR	200	0.847684	24.404
BERNOULLI	Urban100	img_029_SRF_2_HR	210	0.811575	23.3541
BERNOULLI	Urban100	img_029_SRF_2_HR	220	0.764212	22.2827
BERNOULLI	Urban100	img_029_SRF_2_HR	230	0.698916	20.9615
BERNOULLI	Urban100	img_029_SRF_2_HR	240	0.590827	18.8939
BERNOULLI	Urban100	img_076_SRF_2_HR	150	0.900665	25.5861
BERNOULLI	Urban100	img_076_SRF_2_HR	160	0.885704	24.9816
BERNOULLI	Urban100	img_076_SRF_2_HR	170	0.870078	24.582
BERNOULLI	Urban100	img_076_SRF_2_HR	180	0.849065	23.9547
BERNOULLI	Urban100	img_076_SRF_2_HR	190	0.823957	23.2708
BERNOULLI	Urban100	img_076_SRF_2_HR	200	0.797081	22.7364
BERNOULLI	Urban100	img_076_SRF_2_HR	210	0.761736	21.9617
BERNOULLI	Urban100	img_076_SRF_2_HR	220	0.704845	20.9912
BERNOULLI	Urban100	img_076_SRF_2_HR	230	0.647118	20.1653
BERNOULLI	Urban100	img_076_SRF_2_HR	240	0.571156	19.155
BERNOULLI	Urban100	img_050_SRF_2_HR	150	0.918586	27.252
BERNOULLI	Urban100	img_050_SRF_2_HR	160	0.905497	26.5937
BERNOULLI	Urban100	img_050_SRF_2_HR	170	0.890692	25.987
BERNOULLI	Urban100	img_050_SRF_2_HR	180	0.876482	25.4519
BERNOULLI	Urban100	img_050_SRF_2_HR	190	0.853047	24.7361
BERNOULLI	Urban100	img_050_SRF_2_HR	200	0.8289	24.1094
BERNOULLI	Urban100	img_050_SRF_2_HR	210	0.797839	23.3636
BERNOULLI	Urban100	img_050_SRF_2_HR	220	0.756258	22.6128
BERNOULLI	Urban100	img_050_SRF_2_HR	230	0.690804	21.6252
BERNOULLI	Urban100	img_050_SRF_2_HR	240	0.619665	20.715
BERNOULLI	Urban100	img_095_SRF_2_HR	150	0.830663	25.0931
BERNOULLI	Urban100	img_095_SRF_2_HR	160	0.806545	24.5248
BERNOULLI	Urban100	img_095_SRF_2_HR	170	0.781889	24.0546
BERNOULLI	Urban100	img_095_SRF_2_HR	180	0.747314	23.338
BERNOULLI	Urban100	img_095_SRF_2_HR	190	0.712512	22.7271
BERNOULLI	Urban100	img_095_SRF_2_HR	200	0.670029	22.127
BERNOULLI	Urban100	img_095_SRF_2_HR	210	0.617001	21.4225
BERNOULLI	Urban100	img_095_SRF_2_HR	220	0.55899	20.7673
BERNOULLI	Urban100	img_095_SRF_2_HR	230	0.482441	19.9002
BERNOULLI	Urban100	img_095_SRF_2_HR	240	0.375666	18.9815
BERNOULLI	Urban100	img_020_SRF_2_HR	150	0.900766	24.4421
BERNOULLI	Urban100	img_020_SRF_2_HR	160	0.88671	23.7918
BERNOULLI	Urban100	img_020_SRF_2_HR	170	0.867935	23.1561
BERNOULLI	Urban100	img_020_SRF_2_HR	180	0.844507	22.5258
BERNOULLI	Urban100	img_020_SRF_2_HR	190	0.824712	21.9448
BERNOULLI	Urban100	img_020_SRF_2_HR	200	0.789499	21.1132
BERNOULLI	Urban100	img_020_SRF_2_HR	210	0.753371	20.4455
BERNOULLI	Urban100	img_020_SRF_2_HR	220	0.701939	19.6363
BERNOULLI	Urban100	img_020_SRF_2_HR	230	0.638914	18.8096
BERNOULLI	Urban100	img_020_SRF_2_HR	240	0.545576	17.7639
BERNOULLI	Urban100	img_045_SRF_2_HR	150	0.961529	28.3585
BERNOULLI	Urban100	img_045_SRF_2_HR	160	0.952927	27.619
BERNOULLI	Urban100	img_045_SRF_2_HR	170	0.943532	26.7607
BERNOULLI	Urban100	img_045_SRF_2_HR	180	0.930401	26.0622
BERNOULLI	Urban100	img_045_SRF_2_HR	190	0.917447	25.1582
BERNOULLI	Urban100	img_045_SRF_2_HR	200	0.891986	24.1637
BERNOULLI	Urban100	img_045_SRF_2_HR	210	0.859679	23.1669
BERNOULLI	Urban100	img_045_SRF_2_HR	220	0.804316	21.8714
BERNOULLI	Urban100	img_045_SRF_2_HR	230	0.718189	20.1614
BERNOULLI	Urban100	img_045_SRF_2_HR	240	0.543238	18.0048
BERNOULLI	Urban100	img_006_SRF_2_HR	150	0.89452	26.1183
BERNOULLI	Urban100	img_006_SRF_2_HR	160	0.878738	25.49
BERNOULLI	Urban100	img_006_SRF_2_HR	170	0.859648	24.6827
BERNOULLI	Urban100	img_006_SRF_2_HR	180	0.83703	24.041
BERNOULLI	Urban100	img_006_SRF_2_HR	190	0.809325	23.2637
BERNOULLI	Urban100	img_006_SRF_2_HR	200	0.776238	22.5636
BERNOULLI	Urban100	img_006_SRF_2_HR	210	0.731591	21.5963
BERNOULLI	Urban100	img_006_SRF_2_HR	220	0.678264	20.6966
BERNOULLI	Urban100	img_006_SRF_2_HR	230	0.595853	19.6839
BERNOULLI	Urban100	img_006_SRF_2_HR	240	0.47848	18.3826
BERNOULLI	Urban100	img_043_SRF_2_HR	150	0.969047	30.163
BERNOULLI	Urban100	img_043_SRF_2_HR	160	0.964104	29.3648
BERNOULLI	Urban100	img_043_SRF_2_HR	170	0.957862	28.4822
BERNOULLI	Urban100	img_043_SRF_2_HR	180	0.950867	27.6484
BERNOULLI	Urban100	img_043_SRF_2_HR	190	0.941897	26.5769
BERNOULLI	Urban100	img_043_SRF_2_HR	200	0.928559	25.2655
BERNOULLI	Urban100	img_043_SRF_2_HR	210	0.911538	24.0961
BERNOULLI	Urban100	img_043_SRF_2_HR	220	0.883713	22.1803
BERNOULLI	Urban100	img_043_SRF_2_HR	230	0.837557	20.3413
BERNOULLI	Urban100	img_043_SRF_2_HR	240	0.751966	17.126
BERNOULLI	Urban100	img_063_SRF_2_HR	150	0.913803	24.5512
BERNOULLI	Urban100	img_063_SRF_2_HR	160	0.901679	23.8127
BERNOULLI	Urban100	img_063_SRF_2_HR	170	0.88646	22.9893
BERNOULLI	Urban100	img_063_SRF_2_HR	180	0.871143	22.2926
BERNOULLI	Urban100	img_063_SRF_2_HR	190	0.851287	21.5256
BERNOULLI	Urban100	img_063_SRF_2_HR	200	0.823982	20.5872
BERNOULLI	Urban100	img_063_SRF_2_HR	210	0.78247	19.3828
BERNOULLI	Urban100	img_063_SRF_2_HR	220	0.733577	18.3363
BERNOULLI	Urban100	img_063_SRF_2_HR	230	0.662603	17.0199
BERNOULLI	Urban100	img_063_SRF_2_HR	240	0.551224	15.5831
BERNOULLI	Urban100	img_007_SRF_2_HR	150	0.961382	31.0668
BERNOULLI	Urban100	img_007_SRF_2_HR	160	0.955099	30.3874
BERNOULLI	Urban100	img_007_SRF_2_HR	170	0.946556	29.5556
BERNOULLI	Urban100	img_007_SRF_2_HR	180	0.934084	28.4639
BERNOULLI	Urban100	img_007_SRF_2_HR	190	0.922387	27.8355
BERNOULLI	Urban100	img_007_SRF_2_HR	200	0.902503	26.606
BERNOULLI	Urban100	img_007_SRF_2_HR	210	0.882159	25.7526
BERNOULLI	Urban100	img_007_SRF_2_HR	220	0.844451	24.2662
BERNOULLI	Urban100	img_007_SRF_2_HR	230	0.788111	22.8143
BERNOULLI	Urban100	img_007_SRF_2_HR	240	0.67805	20.4967
BERNOULLI	Urban100	img_077_SRF_2_HR	150	0.897865	27.3096
BERNOULLI	Urban100	img_077_SRF_2_HR	160	0.883897	26.8046
BERNOULLI	Urban100	img_077_SRF_2_HR	170	0.864132	26.0912
BERNOULLI	Urban100	img_077_SRF_2_HR	180	0.849962	25.7242
BERNOULLI	Urban100	img_077_SRF_2_HR	190	0.83116	25.1434
BERNOULLI	Urban100	img_077_SRF_2_HR	200	0.807836	24.5833
BERNOULLI	Urban100	img_077_SRF_2_HR	210	0.77273	23.8952
BERNOULLI	Urban100	img_077_SRF_2_HR	220	0.73669	23.2458
BERNOULLI	Urban100	img_077_SRF_2_HR	230	0.682474	22.3074
BERNOULLI	Urban100	img_077_SRF_2_HR	240	0.602457	21.182
BERNOULLI	Urban100	img_054_SRF_2_HR	150	0.926138	26.2886
BERNOULLI	Urban100	img_054_SRF_2_HR	160	0.916337	25.7759
BERNOULLI	Urban100	img_054_SRF_2_HR	170	0.902183	25.0007
BERNOULLI	Urban100	img_054_SRF_2_HR	180	0.886186	24.397
BERNOULLI	Urban100	img_054_SRF_2_HR	190	0.865518	23.4774
BERNOULLI	Urban100	img_054_SRF_2_HR	200	0.839987	22.7118
BERNOULLI	Urban100	img_054_SRF_2_HR	210	0.809798	21.9177
BERNOULLI	Urban100	img_054_SRF_2_HR	220	0.765232	21.027
BERNOULLI	Urban100	img_054_SRF_2_HR	230	0.700193	19.9802
BERNOULLI	Urban100	img_054_SRF_2_HR	240	0.5934	18.6899
BERNOULLI	Urban100	img_068_SRF_2_HR	150	0.954152	31.6454
BERNOULLI	Urban100	img_068_SRF_2_HR	160	0.946287	30.9549
BERNOULLI	Urban100	img_068_SRF_2_HR	170	0.935624	30.1996
BERNOULLI	Urban100	img_068_SRF_2_HR	180	0.923628	29.4871
BERNOULLI	Urban100	img_068_SRF_2_HR	190	0.90673	28.5498
BERNOULLI	Urban100	img_068_SRF_2_HR	200	0.88248	27.5794
BERNOULLI	Urban100	img_068_SRF_2_HR	210	0.850315	26.5053
BERNOULLI	Urban100	img_068_SRF_2_HR	220	0.813179	25.516
BERNOULLI	Urban100	img_068_SRF_2_HR	230	0.745417	24.0746
BERNOULLI	Urban100	img_068_SRF_2_HR	240	0.65536	22.5477
BERNOULLI	Urban100	img_089_SRF_2_HR	150	0.916479	30.1608
BERNOULLI	Urban100	img_089_SRF_2_HR	160	0.902884	29.4516
BERNOULLI	Urban100	img_089_SRF_2_HR	170	0.887978	28.7915
BERNOULLI	Urban100	img_089_SRF_2_HR	180	0.873493	28.3348
BERNOULLI	Urban100	img_089_SRF_2_HR	190	0.850383	27.5752
BERNOULLI	Urban100	img_089_SRF_2_HR	200	0.826013	26.9629
BERNOULLI	Urban100	img_089_SRF_2_HR	210	0.793883	26.0974
BERNOULLI	Urban100	img_089_SRF_2_HR	220	0.750435	25.2366
BERNOULLI	Urban100	img_089_SRF_2_HR	230	0.683791	24.3121
BERNOULLI	Urban100	img_089_SRF_2_HR	240	0.589857	22.7948
BERNOULLI	Urban100	img_010_SRF_2_HR	150	0.957689	31.7744
BERNOULLI	Urban100	img_010_SRF_2_HR	160	0.949287	30.8294
BERNOULLI	Urban100	img_010_SRF_2_HR	170	0.939557	30.0112
BERNOULLI	Urban100	img_010_SRF_2_HR	180	0.932174	29.2935
BERNOULLI	Urban100	img_010_SRF_2_HR	190	0.920723	28.3689
BERNOULLI	Urban100	img_010_SRF_2_HR	200	0.903717	27.3903
BERNOULLI	Urban100	img_010_SRF_2_HR	210	0.881759	26.2519
BERNOULLI	Urban100	img_010_SRF_2_HR	220	0.854193	25.1345
BERNOULLI	Urban100	img_010_SRF_2_HR	230	0.805447	23.6418
BERNOULLI	Urban100	img_010_SRF_2_HR	240	0.737137	21.7672
BERNOULLI	Urban100	img_097_SRF_2_HR	150	0.944183	28.857
BERNOULLI	Urban100	img_097_SRF_2_HR	160	0.935914	28.3272
BERNOULLI	Urban100	img_097_SRF_2_HR	170	0.924598	27.5679
BERNOULLI	Urban100	img_097_SRF_2_HR	180	0.912067	26.7955
BERNOULLI	Urban100	img_097_SRF_2_HR	190	0.89291	26.0341
BERNOULLI	Urban100	img_097_SRF_2_HR	200	0.873082	25.228
BERNOULLI	Urban100	img_097_SRF_2_HR	210	0.844051	24.2868
BERNOULLI	Urban100	img_097_SRF_2_HR	220	0.800351	23.1817
BERNOULLI	Urban100	img_097_SRF_2_HR	230	0.742736	22.0996
BERNOULLI	Urban100	img_097_SRF_2_HR	240	0.641919	20.4542
BERNOULLI	Urban100	img_062_SRF_2_HR	150	0.896562	24.3978
BERNOULLI	Urban100	img_062_SRF_2_HR	160	0.880751	23.847
BERNOULLI	Urban100	img_062_SRF_2_HR	170	0.865395	23.3061
BERNOULLI	Urban100	img_062_SRF_2_HR	180	0.841943	22.4612
BERNOULLI	Urban100	img_062_SRF_2_HR	190	0.817951	21.8783
BERNOULLI	Urban100	img_062_SRF_2_HR	200	0.781537	21.0928
BERNOULLI	Urban100	img_062_SRF_2_HR	210	0.745971	20.3327
BERNOULLI	Urban100	img_062_SRF_2_HR	220	0.695627	19.6101
BERNOULLI	Urban100	img_062_SRF_2_HR	230	0.629164	18.598
BERNOULLI	Urban100	img_062_SRF_2_HR	240	0.531935	17.434
BERNOULLI	Urban100	img_069_SRF_2_HR	150	0.927842	28.2968
BERNOULLI	Urban100	img_069_SRF_2_HR	160	0.916879	27.703
BERNOULLI	Urban100	img_069_SRF_2_HR	170	0.903599	27.0746
BERNOULLI	Urban100	img_069_SRF_2_HR	180	0.89078	26.4822
BERNOULLI	Urban100	img_069_SRF_2_HR	190	0.870728	25.8617
BERNOULLI	Urban100	img_069_SRF_2_HR	200	0.846892	25.2145
BERNOULLI	Urban100	img_069_SRF_2_HR	210	0.814821	24.3172
BERNOULLI	Urban100	img_069_SRF_2_HR	220	0.771583	23.3631
BERNOULLI	Urban100	img_069_SRF_2_HR	230	0.707751	22.3487
BERNOULLI	Urban100	img_069_SRF_2_HR	240	0.604468	20.9087
BERNOULLI	Urban100	img_047_SRF_2_HR	150	0.913445	25.0014
BERNOULLI	Urban100	img_047_SRF_2_HR	160	0.90035	24.4169
BERNOULLI	Urban100	img_047_SRF_2_HR	170	0.885437	23.8138
BERNOULLI	Urban100	img_047_SRF_2_HR	180	0.867075	23.2144
BERNOULLI	Urban100	img_047_SRF_2_HR	190	0.845192	22.4975
BERNOULLI	Urban100	img_047_SRF_2_HR	200	0.821213	21.8248
BERNOULLI	Urban100	img_047_SRF_2_HR	210	0.784985	21.0726
BERNOULLI	Urban100	img_047_SRF_2_HR	220	0.730529	20.2624
BERNOULLI	Urban100	img_047_SRF_2_HR	230	0.669276	19.3803
BERNOULLI	Urban100	img_047_SRF_2_HR	240	0.578783	18.3749
BERNOULLI	Urban100	img_039_SRF_2_HR	150	0.912044	26.949
BERNOULLI	Urban100	img_039_SRF_2_HR	160	0.900985	26.4792
BERNOULLI	Urban100	img_039_SRF_2_HR	170	0.881524	25.5278
BERNOULLI	Urban100	img_039_SRF_2_HR	180	0.865724	24.8911
BERNOULLI	Urban100	img_039_SRF_2_HR	190	0.840315	24.0322
BERNOULLI	Urban100	img_039_SRF_2_HR	200	0.814574	23.2432
BERNOULLI	Urban100	img_039_SRF_2_HR	210	0.772362	22.3807
BERNOULLI	Urban100	img_039_SRF_2_HR	220	0.730034	21.5446
BERNOULLI	Urban100	img_039_SRF_2_HR	230	0.656422	20.1601
BERNOULLI	Urban100	img_039_SRF_2_HR	240	0.563651	18.8477
BERNOULLI	Urban100	img_044_SRF_2_HR	150	0.962797	32.4771
BERNOULLI	Urban100	img_044_SRF_2_HR	160	0.954516	31.7064
BERNOULLI	Urban100	img_044_SRF_2_HR	170	0.943539	30.7782
BERNOULLI	Urban100	img_044_SRF_2_HR	180	0.930218	29.7955
BERNOULLI	Urban100	img_044_SRF_2_HR	190	0.912321	28.8698
BERNOULLI	Urban100	img_044_SRF_2_HR	200	0.891307	27.852
BERNOULLI	Urban100	img_044_SRF_2_HR	210	0.854566	26.5134
BERNOULLI	Urban100	img_044_SRF_2_HR	220	0.797278	25.1655
BERNOULLI	Urban100	img_044_SRF_2_HR	230	0.708599	23.4915
BERNOULLI	Urban100	img_044_SRF_2_HR	240	0.555263	21.4327
BERNOULLI	Urban100	img_082_SRF_2_HR	150	0.971954	32.4023
BERNOULLI	Urban100	img_082_SRF_2_HR	160	0.968114	31.6494
BERNOULLI	Urban100	img_082_SRF_2_HR	170	0.96322	30.8687
BERNOULLI	Urban100	img_082_SRF_2_HR	180	0.958435	30.1536
BERNOULLI	Urban100	img_082_SRF_2_HR	190	0.950806	29.3519
BERNOULLI	Urban100	img_082_SRF_2_HR	200	0.941956	28.4325
BERNOULLI	Urban100	img_082_SRF_2_HR	210	0.928321	27.0285
BERNOULLI	Urban100	img_082_SRF_2_HR	220	0.910956	25.8997
BERNOULLI	Urban100	img_082_SRF_2_HR	230	0.880677	24.2507
BERNOULLI	Urban100	img_082_SRF_2_HR	240	0.819796	21.7635
BERNOULLI	Urban100	img_015_SRF_2_HR	150	0.936569	29.0708
BERNOULLI	Urban100	img_015_SRF_2_HR	160	0.928909	28.3818
BERNOULLI	Urban100	img_015_SRF_2_HR	170	0.917544	27.6795
BERNOULLI	Urban100	img_015_SRF_2_HR	180	0.905123	26.9167
BERNOULLI	Urban100	img_015_SRF_2_HR	190	0.889702	26.1712
BERNOULLI	Urban100	img_015_SRF_2_HR	200	0.871258	25.2431
BERNOULLI	Urban100	img_015_SRF_2_HR	210	0.843909	24.2419
BERNOULLI	Urban100	img_015_SRF_2_HR	220	0.808564	23.234
BERNOULLI	Urban100	img_015_SRF_2_HR	230	0.752383	21.7867
BERNOULLI	Urban100	img_015_SRF_2_HR	240	0.661755	20.0183
BERNOULLI	Urban100	img_072_SRF_2_HR	150	0.943236	22.3074
BERNOULLI	Urban100	img_072_SRF_2_HR	160	0.932411	21.4723
BERNOULLI	Urban100	img_072_SRF_2_HR	170	0.917974	20.6201
BERNOULLI	Urban100	img_072_SRF_2_HR	180	0.902282	19.7811
BERNOULLI	Urban100	img_072_SRF_2_HR	190	0.879848	18.8792
BERNOULLI	Urban100	img_072_SRF_2_HR	200	0.851562	17.9626
BERNOULLI	Urban100	img_072_SRF_2_HR	210	0.816979	16.9432
BERNOULLI	Urban100	img_072_SRF_2_HR	220	0.75467	15.7282
BERNOULLI	Urban100	img_072_SRF_2_HR	230	0.65844	14.2981
BERNOULLI	Urban100	img_072_SRF_2_HR	240	0.507534	12.6228
BERNOULLI	Urban100	img_071_SRF_2_HR	150	0.907168	32.3057
BERNOULLI	Urban100	img_071_SRF_2_HR	160	0.894965	31.8266
BERNOULLI	Urban100	img_071_SRF_2_HR	170	0.877448	30.9494
BERNOULLI	Urban100	img_071_SRF_2_HR	180	0.862126	30.4463
BERNOULLI	Urban100	img_071_SRF_2_HR	190	0.83918	29.6008
BERNOULLI	Urban100	img_071_SRF_2_HR	200	0.813766	28.761
BERNOULLI	Urban100	img_071_SRF_2_HR	210	0.779817	27.9642
BERNOULLI	Urban100	img_071_SRF_2_HR	220	0.735451	27.1131
BERNOULLI	Urban100	img_071_SRF_2_HR	230	0.672637	25.9633
BERNOULLI	Urban100	img_071_SRF_2_HR	240	0.578434	24.5151
BERNOULLI	Urban100	img_023_SRF_2_HR	150	0.747311	27.3512
BERNOULLI	Urban100	img_023_SRF_2_HR	160	0.740238	26.0413
BERNOULLI	Urban100	img_023_SRF_2_HR	170	0.730778	23.2622
BERNOULLI	Urban100	img_023_SRF_2_HR	180	0.720994	20.7809
BERNOULLI	Urban100	img_023_SRF_2_HR	190	0.710322	18.7678
BERNOULLI	Urban100	img_023_SRF_2_HR	200	0.692908	17.1511
BERNOULLI	Urban100	img_023_SRF_2_HR	210	0.674899	16.8984
BERNOULLI	Urban100	img_023_SRF_2_HR	220	0.637597	16.7618
BERNOULLI	Urban100	img_023_SRF_2_HR	230	0.572762	16.3234
BERNOULLI	Urban100	img_023_SRF_2_HR	240	0.449534	15.6209
BERNOULLI	Urban100	img_051_SRF_2_HR	150	0.94677	29.3343
BERNOULLI	Urban100	img_051_SRF_2_HR	160	0.937049	28.6053
BERNOULLI	Urban100	img_051_SRF_2_HR	170	0.926471	27.9634
BERNOULLI	Urban100	img_051_SRF_2_HR	180	0.914091	27.2457
BERNOULLI	Urban100	img_051_SRF_2_HR	190	0.897234	26.4486
BERNOULLI	Urban100	img_051_SRF_2_HR	200	0.877881	25.7637
BERNOULLI	Urban100	img_051_SRF_2_HR	210	0.851862	24.8027
BERNOULLI	Urban100	img_051_SRF_2_HR	220	0.815798	23.8798
BERNOULLI	Urban100	img_051_SRF_2_HR	230	0.756736	22.7537
BERNOULLI	Urban100	img_051_SRF_2_HR	240	0.654844	21.1304
BERNOULLI	Urban100	img_001_SRF_2_HR	150	0.929533	30.7244
BERNOULLI	Urban100	img_001_SRF_2_HR	160	0.921044	30.1105
BERNOULLI	Urban100	img_001_SRF_2_HR	170	0.910409	29.5786
BERNOULLI	Urban100	img_001_SRF_2_HR	180	0.897929	28.8126
BERNOULLI	Urban100	img_001_SRF_2_HR	190	0.877742	27.8895
BERNOULLI	Urban100	img_001_SRF_2_HR	200	0.856994	27.1431
BERNOULLI	Urban100	img_001_SRF_2_HR	210	0.836424	26.3463
BERNOULLI	Urban100	img_001_SRF_2_HR	220	0.794746	25.0195
BERNOULLI	Urban100	img_001_SRF_2_HR	230	0.738809	23.674
BERNOULLI	Urban100	img_001_SRF_2_HR	240	0.642709	21.7322
BERNOULLI	Urban100	img_004_SRF_2_HR	150	0.889469	22.4052
BERNOULLI	Urban100	img_004_SRF_2_HR	160	0.876054	21.9569
BERNOULLI	Urban100	img_004_SRF_2_HR	170	0.854018	21.1069
BERNOULLI	Urban100	img_004_SRF_2_HR	180	0.827831	20.4111
BERNOULLI	Urban100	img_004_SRF_2_HR	190	0.801083	19.6791
BERNOULLI	Urban100	img_004_SRF_2_HR	200	0.761341	18.9142
BERNOULLI	Urban100	img_004_SRF_2_HR	210	0.717238	18.1457
BERNOULLI	Urban100	img_004_SRF_2_HR	220	0.653736	17.3433
BERNOULLI	Urban100	img_004_SRF_2_HR	230	0.572692	16.515
BERNOULLI	Urban100	img_004_SRF_2_HR	240	0.434934	15.6058
BERNOULLI	Urban100	img_086_SRF_2_HR	150	0.961769	32.9368
BERNOULLI	Urban100	img_086_SRF_2_HR	160	0.956815	32.1817
BERNOULLI	Urban100	img_086_SRF_2_HR	170	0.949044	31.3979
BERNOULLI	Urban100	img_086_SRF_2_HR	180	0.940728	30.5324
BERNOULLI	Urban100	img_086_SRF_2_HR	190	0.931908	30.1239
BERNOULLI	Urban100	img_086_SRF_2_HR	200	0.918816	29.0493
BERNOULLI	Urban100	img_086_SRF_2_HR	210	0.904026	28.2047
BERNOULLI	Urban100	img_086_SRF_2_HR	220	0.881763	26.9496
BERNOULLI	Urban100	img_086_SRF_2_HR	230	0.849705	25.5554
BERNOULLI	Urban100	img_086_SRF_2_HR	240	0.795575	23.9472
BERNOULLI	Urban100	img_090_SRF_2_HR	150	0.98317	36.4118
BERNOULLI	Urban100	img_090_SRF_2_HR	160	0.980178	35.7116
BERNOULLI	Urban100	img_090_SRF_2_HR	170	0.975851	34.8078
BERNOULLI	Urban100	img_090_SRF_2_HR	180	0.970602	33.8381
BERNOULLI	Urban100	img_090_SRF_2_HR	190	0.963528	32.9493
BERNOULLI	Urban100	img_090_SRF_2_HR	200	0.954016	32.152
BERNOULLI	Urban100	img_090_SRF_2_HR	210	0.940306	30.8004
BERNOULLI	Urban100	img_090_SRF_2_HR	220	0.915189	29.4544
BERNOULLI	Urban100	img_090_SRF_2_HR	230	0.87856	27.8753
BERNOULLI	Urban100	img_090_SRF_2_HR	240	0.794915	25.6509
BERNOULLI	Urban100	img_005_SRF_2_HR	150	0.968221	28.2077
BERNOULLI	Urban100	img_005_SRF_2_HR	160	0.963802	27.4623
BERNOULLI	Urban100	img_005_SRF_2_HR	170	0.956707	26.6314
BERNOULLI	Urban100	img_005_SRF_2_HR	180	0.951091	25.942
BERNOULLI	Urban100	img_005_SRF_2_HR	190	0.938441	25.0108
BERNOULLI	Urban100	img_005_SRF_2_HR	200	0.922661	23.9223
BERNOULLI	Urban100	img_005_SRF_2_HR	210	0.908074	23.0234
BERNOULLI	Urban100	img_005_SRF_2_HR	220	0.872857	21.5803
BERNOULLI	Urban100	img_005_SRF_2_HR	230	0.829584	20.3035
BERNOULLI	Urban100	img_005_SRF_2_HR	240	0.749272	18.5697
BERNOULLI	Urban100	img_040_SRF_2_HR	150	0.986128	29.4268
BERNOULLI	Urban100	img_040_SRF_2_HR	160	0.983163	28.5874
BERNOULLI	Urban100	img_040_SRF_2_HR	170	0.979528	27.6333
BERNOULLI	Urban100	img_040_SRF_2_HR	180	0.973724	26.3901
BERNOULLI	Urban100	img_040_SRF_2_HR	190	0.968729	25.7853
BERNOULLI	Urban100	img_040_SRF_2_HR	200	0.959117	24.4306
BERNOULLI	Urban100	img_040_SRF_2_HR	210	0.941216	22.7358
BERNOULLI	Urban100	img_040_SRF_2_HR	220	0.912069	21.0177
BERNOULLI	Urban100	img_040_SRF_2_HR	230	0.863892	18.9788
BERNOULLI	Urban100	img_040_SRF_2_HR	240	0.764191	16.4011
BERNOULLI	Urban100	img_002_SRF_2_HR	150	0.950209	29.4331
BERNOULLI	Urban100	img_002_SRF_2_HR	160	0.943637	28.87
BERNOULLI	Urban100	img_002_SRF_2_HR	170	0.932377	28.105
BERNOULLI	Urban100	img_002_SRF_2_HR	180	0.922085	27.5126
BERNOULLI	Urban100	img_002_SRF_2_HR	190	0.906012	26.6361
BERNOULLI	Urban100	img_002_SRF_2_HR	200	0.884947	25.7282
BERNOULLI	Urban100	img_002_SRF_2_HR	210	0.859656	24.8371
BERNOULLI	Urban100	img_002_SRF_2_HR	220	0.81671	23.7357
BERNOULLI	Urban100	img_002_SRF_2_HR	230	0.758611	22.468
BERNOULLI	Urban100	img_002_SRF_2_HR	240	0.654634	20.6773
BERNOULLI	Urban100	img_083_SRF_2_HR	150	0.921473	26.651
BERNOULLI	Urban100	img_083_SRF_2_HR	160	0.909268	26.0636
BERNOULLI	Urban100	img_083_SRF_2_HR	170	0.894377	25.2629
BERNOULLI	Urban100	img_083_SRF_2_HR	180	0.875628	24.6799
BERNOULLI	Urban100	img_083_SRF_2_HR	190	0.854649	23.8332
BERNOULLI	Urban100	img_083_SRF_2_HR	200	0.827348	23.1197
BERNOULLI	Urban100	img_083_SRF_2_HR	210	0.78448	22.1125
BERNOULLI	Urban100	img_083_SRF_2_HR	220	0.742017	21.2873
BERNOULLI	Urban100	img_083_SRF_2_HR	230	0.665101	19.9999
BERNOULLI	Urban100	img_083_SRF_2_HR	240	0.550127	18.565
BERNOULLI	Urban100	img_008_SRF_2_HR	150	0.892031	24.5715
BERNOULLI	Urban100	img_008_SRF_2_HR	160	0.876694	23.9644
BERNOULLI	Urban100	img_008_SRF_2_HR	170	0.857454	23.4125
BERNOULLI	Urban100	img_008_SRF_2_HR	180	0.829018	22.6555
BERNOULLI	Urban100	img_008_SRF_2_HR	190	0.799861	21.9421
BERNOULLI	Urban100	img_008_SRF_2_HR	200	0.760745	21.2954
BERNOULLI	Urban100	img_008_SRF_2_HR	210	0.721165	20.6003
BERNOULLI	Urban100	img_008_SRF_2_HR	220	0.651814	19.7167
BERNOULLI	Urban100	img_008_SRF_2_HR	230	0.565842	18.6971
BERNOULLI	Urban100	img_008_SRF_2_HR	240	0.445057	17.6863
BERNOULLI	Urban100	img_032_SRF_2_HR	150	0.942619	32.218
BERNOULLI	Urban100	img_032_SRF_2_HR	160	0.936844	31.7487
BERNOULLI	Urban100	img_032_SRF_2_HR	170	0.926599	31.1071
BERNOULLI	Urban100	img_032_SRF_2_HR	180	0.914405	30.1921
BERNOULLI	Urban100	img_032_SRF_2_HR	190	0.897102	29.4595
BERNOULLI	Urban100	img_032_SRF_2_HR	200	0.875966	28.5751
BERNOULLI	Urban100	img_032_SRF_2_HR	210	0.844775	27.6271
BERNOULLI	Urban100	img_032_SRF_2_HR	220	0.812057	26.8029
BERNOULLI	Urban100	img_032_SRF_2_HR	230	0.76294	25.3801
BERNOULLI	Urban100	img_032_SRF_2_HR	240	0.695011	23.8161
BERNOULLI	Urban100	img_028_SRF_2_HR	150	0.969916	33.9011
BERNOULLI	Urban100	img_028_SRF_2_HR	160	0.964004	32.8123
BERNOULLI	Urban100	img_028_SRF_2_HR	170	0.958	31.9208
BERNOULLI	Urban100	img_028_SRF_2_HR	180	0.951878	31.5091
BERNOULLI	Urban100	img_028_SRF_2_HR	190	0.943951	30.6328
BERNOULLI	Urban100	img_028_SRF_2_HR	200	0.934409	30.1801
BERNOULLI	Urban100	img_028_SRF_2_HR	210	0.917972	28.7251
BERNOULLI	Urban100	img_028_SRF_2_HR	220	0.893655	27.6101
BERNOULLI	Urban100	img_028_SRF_2_HR	230	0.859518	26.89
BERNOULLI	Urban100	img_028_SRF_2_HR	240	0.798996	25.1753
BERNOULLI	Urban100	img_012_SRF_2_HR	150	0.917913	27.9484
BERNOULLI	Urban100	img_012_SRF_2_HR	160	0.90759	27.3644
BERNOULLI	Urban100	img_012_SRF_2_HR	170	0.893971	26.8823
BERNOULLI	Urban100	img_012_SRF_2_HR	180	0.879405	26.1928
BERNOULLI	Urban100	img_012_SRF_2_HR	190	0.856329	25.5387
BERNOULLI	Urban100	img_012_SRF_2_HR	200	0.832515	24.8461
BERNOULLI	Urban100	img_012_SRF_2_HR	210	0.799618	24.0426
BERNOULLI	Urban100	img_012_SRF_2_HR	220	0.755607	23.156
BERNOULLI	Urban100	img_012_SRF_2_HR	230	0.697074	22.133
BERNOULLI	Urban100	img_012_SRF_2_HR	240	0.593837	20.7885
BERNOULLI	Urban100	img_061_SRF_2_HR	150	0.909532	27.3638
BERNOULLI	Urban100	img_061_SRF_2_HR	160	0.897286	26.8131
BERNOULLI	Urban100	img_061_SRF_2_HR	170	0.880262	26.1221
BERNOULLI	Urban100	img_061_SRF_2_HR	180	0.861976	25.47
BERNOULLI	Urban100	img_061_SRF_2_HR	190	0.837548	24.7787
BERNOULLI	Urban100	img_061_SRF_2_HR	200	0.814003	24.0837
BERNOULLI	Urban100	img_061_SRF_2_HR	210	0.784718	23.4676
BERNOULLI	Urban100	img_061_SRF_2_HR	220	0.735436	22.5492
BERNOULLI	Urban100	img_061_SRF_2_HR	230	0.673208	21.5624
BERNOULLI	Urban100	img_061_SRF_2_HR	240	0.571312	20.0954
BERNOULLI	Urban100	img_009_SRF_2_HR	150	0.977562	38.0679
BERNOULLI	Urban100	img_009_SRF_2_HR	160	0.97293	37.1443
BERNOULLI	Urban100	img_009_SRF_2_HR	170	0.969931	36.491
BERNOULLI	Urban100	img_009_SRF_2_HR	180	0.963938	35.7194
BERNOULLI	Urban100	img_009_SRF_2_HR	190	0.956242	34.8482
BERNOULLI	Urban100	img_009_SRF_2_HR	200	0.946266	33.5881
BERNOULLI	Urban100	img_009_SRF_2_HR	210	0.934399	32.9049
BERNOULLI	Urban100	img_009_SRF_2_HR	220	0.908272	31.437
BERNOULLI	Urban100	img_009_SRF_2_HR	230	0.872806	30.0314
BERNOULLI	Urban100	img_009_SRF_2_HR	240	0.810922	28.1926
BERNOULLI	Urban100	img_026_SRF_2_HR	150	0.959252	34.9974
BERNOULLI	Urban100	img_026_SRF_2_HR	160	0.95272	34.134
BERNOULLI	Urban100	img_026_SRF_2_HR	170	0.947253	33.3716
BERNOULLI	Urban100	img_026_SRF_2_HR	180	0.937541	32.4044
BERNOULLI	Urban100	img_026_SRF_2_HR	190	0.92675	31.58
BERNOULLI	Urban100	img_026_SRF_2_HR	200	0.912798	30.6991
BERNOULLI	Urban100	img_026_SRF_2_HR	210	0.893943	29.6116
BERNOULLI	Urban100	img_026_SRF_2_HR	220	0.864832	28.373
BERNOULLI	Urban100	img_026_SRF_2_HR	230	0.823421	26.8519
BERNOULLI	Urban100	img_026_SRF_2_HR	240	0.747595	24.6479
BERNOULLI	Urban100	img_080_SRF_2_HR	150	0.979164	38.0798
BERNOULLI	Urban100	img_080_SRF_2_HR	160	0.975086	37.2137
BERNOULLI	Urban100	img_080_SRF_2_HR	170	0.971373	36.5433
BERNOULLI	Urban100	img_080_SRF_2_HR	180	0.966006	35.6639
BERNOULLI	Urban100	img_080_SRF_2_HR	190	0.960015	34.9213
BERNOULLI	Urban100	img_080_SRF_2_HR	200	0.952718	34.1448
BERNOULLI	Urban100	img_080_SRF_2_HR	210	0.939468	32.9662
BERNOULLI	Urban100	img_080_SRF_2_HR	220	0.920375	31.604
BERNOULLI	Urban100	img_080_SRF_2_HR	230	0.893406	30.0768
BERNOULLI	Urban100	img_080_SRF_2_HR	240	0.848235	28.5432
BERNOULLI	Urban100	img_025_SRF_2_HR	150	0.973782	34.8943
BERNOULLI	Urban100	img_025_SRF_2_HR	160	0.970574	34.4563
BERNOULLI	Urban100	img_025_SRF_2_HR	170	0.966321	33.4642
BERNOULLI	Urban100	img_025_SRF_2_HR	180	0.958994	32.136
BERNOULLI	Urban100	img_025_SRF_2_HR	190	0.953075	31.3573
BERNOULLI	Urban100	img_025_SRF_2_HR	200	0.942068	30.0962
BERNOULLI	Urban100	img_025_SRF_2_HR	210	0.930738	28.9404
BERNOULLI	Urban100	img_025_SRF_2_HR	220	0.911897	27.573
BERNOULLI	Urban100	img_025_SRF_2_HR	230	0.874445	25.0707
BERNOULLI	Urban100	img_025_SRF_2_HR	240	0.811977	22.8148
BERNOULLI	Urban100	img_094_SRF_2_HR	150	0.941182	31.4347
BERNOULLI	Urban100	img_094_SRF_2_HR	160	0.932389	30.8833
BERNOULLI	Urban100	img_094_SRF_2_HR	170	0.922096	30.0883
BERNOULLI	Urban100	img_094_SRF_2_HR	180	0.908697	29.3254
BERNOULLI	Urban100	img_094_SRF_2_HR	190	0.896194	28.6778
BERNOULLI	Urban100	img_094_SRF_2_HR	200	0.877503	27.8454
BERNOULLI	Urban100	img_094_SRF_2_HR	210	0.852917	26.9469
BERNOULLI	Urban100	img_094_SRF_2_HR	220	0.815168	25.7602
BERNOULLI	Urban100	img_094_SRF_2_HR	230	0.767474	24.7193
BERNOULLI	Urban100	img_094_SRF_2_HR	240	0.69477	23.0867
BERNOULLI	Urban100	img_030_SRF_2_HR	150	0.937848	26.6863
BERNOULLI	Urban100	img_030_SRF_2_HR	160	0.93006	26.1474
BERNOULLI	Urban100	img_030_SRF_2_HR	170	0.917753	25.3795
BERNOULLI	Urban100	img_030_SRF_2_HR	180	0.898446	24.3577
BERNOULLI	Urban100	img_030_SRF_2_HR	190	0.879042	23.6315
BERNOULLI	Urban100	img_030_SRF_2_HR	200	0.851369	22.7468
BERNOULLI	Urban100	img_030_SRF_2_HR	210	0.813677	21.6419
BERNOULLI	Urban100	img_030_SRF_2_HR	220	0.767071	20.6493
BERNOULLI	Urban100	img_030_SRF_2_HR	230	0.67971	19.1069
BERNOULLI	Urban100	img_030_SRF_2_HR	240	0.549198	17.4213
BERNOULLI	Urban100	img_048_SRF_2_HR	150	0.908522	22.2393
BERNOULLI	Urban100	img_048_SRF_2_HR	160	0.894788	21.6106
BERNOULLI	Urban100	img_048_SRF_2_HR	170	0.883429	21.1345
BERNOULLI	Urban100	img_048_SRF_2_HR	180	0.865029	20.5537
BERNOULLI	Urban100	img_048_SRF_2_HR	190	0.845171	19.9547
BERNOULLI	Urban100	img_048_SRF_2_HR	200	0.818258	19.3056
BERNOULLI	Urban100	img_048_SRF_2_HR	210	0.784527	18.5864
BERNOULLI	Urban100	img_048_SRF_2_HR	220	0.748041	18.0024
BERNOULLI	Urban100	img_048_SRF_2_HR	230	0.690058	17.0952
BERNOULLI	Urban100	img_048_SRF_2_HR	240	0.619574	16.3247
BERNOULLI	Urban100	img_037_SRF_2_HR	150	0.921058	25.4165
BERNOULLI	Urban100	img_037_SRF_2_HR	160	0.905106	24.8793
BERNOULLI	Urban100	img_037_SRF_2_HR	170	0.891395	24.4101
BERNOULLI	Urban100	img_037_SRF_2_HR	180	0.872671	23.7281
BERNOULLI	Urban100	img_037_SRF_2_HR	190	0.849024	23.0806
BERNOULLI	Urban100	img_037_SRF_2_HR	200	0.821667	22.433
BERNOULLI	Urban100	img_037_SRF_2_HR	210	0.786762	21.7956
BERNOULLI	Urban100	img_037_SRF_2_HR	220	0.735691	20.8676
BERNOULLI	Urban100	img_037_SRF_2_HR	230	0.667233	19.8935
BERNOULLI	Urban100	img_037_SRF_2_HR	240	0.563972	18.5056
BERNOULLI	Urban100	img_057_SRF_2_HR	150	0.948801	30.6347
BERNOULLI	Urban100	img_057_SRF_2_HR	160	0.942678	30.0818
BERNOULLI	Urban100	img_057_SRF_2_HR	170	0.931787	29.2625
BERNOULLI	Urban100	img_057_SRF_2_HR	180	0.918508	28.1143
BERNOULLI	Urban100	img_057_SRF_2_HR	190	0.902659	27.4505
BERNOULLI	Urban100	img_057_SRF_2_HR	200	0.881832	26.3665
BERNOULLI	Urban100	img_057_SRF_2_HR	210	0.854573	24.9989
BERNOULLI	Urban100	img_057_SRF_2_HR	220	0.822465	23.9912
BERNOULLI	Urban100	img_057_SRF_2_HR	230	0.76348	22.3566
BERNOULLI	Urban100	img_057_SRF_2_HR	240	0.686896	20.481
BERNOULLI	Urban100	img_093_SRF_2_HR	150	0.959078	29.5801
BERNOULLI	Urban100	img_093_SRF_2_HR	160	0.953917	28.7935
BERNOULLI	Urban100	img_093_SRF_2_HR	170	0.945554	27.8739
BERNOULLI	Urban100	img_093_SRF_2_HR	180	0.937226	26.9456
BERNOULLI	Urban100	img_093_SRF_2_HR	190	0.927558	26.0895
BERNOULLI	Urban100	img_093_SRF_2_HR	200	0.90991	24.8286
BERNOULLI	Urban100	img_093_SRF_2_HR	210	0.8908	23.8558
BERNOULLI	Urban100	img_093_SRF_2_HR	220	0.858949	22.5092
BERNOULLI	Urban100	img_093_SRF_2_HR	230	0.803191	20.5672
BERNOULLI	Urban100	img_093_SRF_2_HR	240	0.685445	17.9311
BERNOULLI	Urban100	img_003_SRF_2_HR	150	0.90514	27.8071
BERNOULLI	Urban100	img_003_SRF_2_HR	160	0.889702	27.1453
BERNOULLI	Urban100	img_003_SRF_2_HR	170	0.874069	26.5212
BERNOULLI	Urban100	img_003_SRF_2_HR	180	0.853156	25.7684
BERNOULLI	Urban100	img_003_SRF_2_HR	190	0.831368	25.186
BERNOULLI	Urban100	img_003_SRF_2_HR	200	0.805932	24.4706
BERNOULLI	Urban100	img_003_SRF_2_HR	210	0.765474	23.5194
BERNOULLI	Urban100	img_003_SRF_2_HR	220	0.718047	22.6453
BERNOULLI	Urban100	img_003_SRF_2_HR	230	0.65363	21.4493
BERNOULLI	Urban100	img_003_SRF_2_HR	240	0.54259	20.0365
BERNOULLI	Urban100	img_021_SRF_2_HR	150	0.929385	32.7828
BERNOULLI	Urban100	img_021_SRF_2_HR	160	0.921429	32.1357
BERNOULLI	Urban100	img_021_SRF_2_HR	170	0.911877	31.4345
BERNOULLI	Urban100	img_021_SRF_2_HR	180	0.899237	30.7013
BERNOULLI	Urban100	img_021_SRF_2_HR	190	0.885124	29.6816
BERNOULLI	Urban100	img_021_SRF_2_HR	200	0.866719	28.6925
BERNOULLI	Urban100	img_021_SRF_2_HR	210	0.846475	27.8102
BERNOULLI	Urban100	img_021_SRF_2_HR	220	0.815069	26.659
BERNOULLI	Urban100	img_021_SRF_2_HR	230	0.773726	25.4049
BERNOULLI	Urban100	img_021_SRF_2_HR	240	0.69656	23.6637
BERNOULLI	Urban100	img_064_SRF_2_HR	150	0.949406	30.4691
BERNOULLI	Urban100	img_064_SRF_2_HR	160	0.940359	29.594
BERNOULLI	Urban100	img_064_SRF_2_HR	170	0.931102	28.9127
BERNOULLI	Urban100	img_064_SRF_2_HR	180	0.917446	28.1467
BERNOULLI	Urban100	img_064_SRF_2_HR	190	0.899529	27.1787
BERNOULLI	Urban100	img_064_SRF_2_HR	200	0.878462	26.2631
BERNOULLI	Urban100	img_064_SRF_2_HR	210	0.84986	25.3832
BERNOULLI	Urban100	img_064_SRF_2_HR	220	0.813521	24.1816
BERNOULLI	Urban100	img_064_SRF_2_HR	230	0.759373	23.0374
BERNOULLI	Urban100	img_064_SRF_2_HR	240	0.660023	21.1751
BERNOULLI	Urban100	img_091_SRF_2_HR	150	0.893599	26.6988
BERNOULLI	Urban100	img_091_SRF_2_HR	160	0.876881	25.9795
BERNOULLI	Urban100	img_091_SRF_2_HR	170	0.858031	25.3854
BERNOULLI	Urban100	img_091_SRF_2_HR	180	0.835973	24.7499
BERNOULLI	Urban100	img_091_SRF_2_HR	190	0.809694	24.024
BERNOULLI	Urban100	img_091_SRF_2_HR	200	0.771473	23.1659
BERNOULLI	Urban100	img_091_SRF_2_HR	210	0.733915	22.4738
BERNOULLI	Urban100	img_091_SRF_2_HR	220	0.66772	21.4074
BERNOULLI	Urban100	img_091_SRF_2_HR	230	0.596663	20.5188
BERNOULLI	Urban100	img_091_SRF_2_HR	240	0.476726	19.1791
BERNOULLI	Urban100	img_011_SRF_2_HR	150	0.932337	22.7795
BERNOULLI	Urban100	img_011_SRF_2_HR	160	0.922477	22.282
BERNOULLI	Urban100	img_011_SRF_2_HR	170	0.910441	21.4852
BERNOULLI	Urban100	img_011_SRF_2_HR	180	0.898695	20.9446
BERNOULLI	Urban100	img_011_SRF_2_HR	190	0.879596	19.9607
BERNOULLI	Urban100	img_011_SRF_2_HR	200	0.852372	19.0585
BERNOULLI	Urban100	img_011_SRF_2_HR	210	0.818455	17.8508
BERNOULLI	Urban100	img_011_SRF_2_HR	220	0.76253	16.3785
BERNOULLI	Urban100	img_011_SRF_2_HR	230	0.674109	14.6914
BERNOULLI	Urban100	img_011_SRF_2_HR	240	0.5308	12.4096
BERNOULLI	Urban100	img_031_SRF_2_HR	150	0.853853	26.4584
BERNOULLI	Urban100	img_031_SRF_2_HR	160	0.832759	25.7974
BERNOULLI	Urban100	img_031_SRF_2_HR	170	0.81157	25.1312
BERNOULLI	Urban100	img_031_SRF_2_HR	180	0.784015	24.1921
BERNOULLI	Urban100	img_031_SRF_2_HR	190	0.756909	23.1706
BERNOULLI	Urban100	img_031_SRF_2_HR	200	0.728323	22.0629
BERNOULLI	Urban100	img_031_SRF_2_HR	210	0.690199	20.881
BERNOULLI	Urban100	img_031_SRF_2_HR	220	0.64532	20.0232
BERNOULLI	Urban100	img_031_SRF_2_HR	230	0.583828	19.1519
BERNOULLI	Urban100	img_031_SRF_2_HR	240	0.498144	18.1389
BERNOULLI	Urban100	img_035_SRF_2_HR	150	0.966169	31.1793
BERNOULLI	Urban100	img_035_SRF_2_HR	160	0.961226	30.3241
BERNOULLI	Urban100	img_035_SRF_2_HR	170	0.953343	29.5306
BERNOULLI	Urban100	img_035_SRF_2_HR	180	0.944285	28.6321
BERNOULLI	Urban100	img_035_SRF_2_HR	190	0.932065	27.5153
BERNOULLI	Urban100	img_035_SRF_2_HR	200	0.918228	26.6362
BERNOULLI	Urban100	img_035_SRF_2_HR	210	0.895249	25.3579
BERNOULLI	Urban100	img_035_SRF_2_HR	220	0.863415	24.1904
BERNOULLI	Urban100	img_035_SRF_2_HR	230	0.806587	22.4945
BERNOULLI	Urban100	img_035_SRF_2_HR	240	0.717279	20.6764
BERNOULLI	Urban100	img_098_SRF_2_HR	150	0.847397	25.4535
BERNOULLI	Urban100	img_098_SRF_2_HR	160	0.827293	24.9029
BERNOULLI	Urban100	img_098_SRF_2_HR	170	0.807482	24.3411
BERNOULLI	Urban100	img_098_SRF_2_HR	180	0.780469	23.8575
BERNOULLI	Urban100	img_098_SRF_2_HR	190	0.749573	23.1894
BERNOULLI	Urban100	img_098_SRF_2_HR	200	0.708676	22.4465
BERNOULLI	Urban100	img_098_SRF_2_HR	210	0.669134	21.8998
BERNOULLI	Urban100	img_098_SRF_2_HR	220	0.598876	21.0597
BERNOULLI	Urban100	img_098_SRF_2_HR	230	0.527834	20.2823
BERNOULLI	Urban100	img_098_SRF_2_HR	240	0.425424	19.2454
BERNOULLI	Urban100	img_046_SRF_2_HR	150	0.928446	29.2633
BERNOULLI	Urban100	img_046_SRF_2_HR	160	0.919071	28.8084
BERNOULLI	Urban100	img_046_SRF_2_HR	170	0.908775	28.2783
BERNOULLI	Urban100	img_046_SRF_2_HR	180	0.893454	27.5749
BERNOULLI	Urban100	img_046_SRF_2_HR	190	0.880234	27.0576
BERNOULLI	Urban100	img_046_SRF_2_HR	200	0.85997	26.4201
BERNOULLI	Urban100	img_046_SRF_2_HR	210	0.834412	25.7415
BERNOULLI	Urban100	img_046_SRF_2_HR	220	0.800482	24.8466
BERNOULLI	Urban100	img_046_SRF_2_HR	230	0.751709	23.8195
BERNOULLI	Urban100	img_046_SRF_2_HR	240	0.68635	22.638
BERNOULLI	Urban100	img_092_SRF_2_HR	150	0.895777	23.8744
BERNOULLI	Urban100	img_092_SRF_2_HR	160	0.880901	23.2673
BERNOULLI	Urban100	img_092_SRF_2_HR	170	0.861139	22.5912
BERNOULLI	Urban100	img_092_SRF_2_HR	180	0.842024	21.9946
BERNOULLI	Urban100	img_092_SRF_2_HR	190	0.813793	21.2242
BERNOULLI	Urban100	img_092_SRF_2_HR	200	0.778242	20.3005
BERNOULLI	Urban100	img_092_SRF_2_HR	210	0.736749	19.6188
BERNOULLI	Urban100	img_092_SRF_2_HR	220	0.681463	18.7283
BERNOULLI	Urban100	img_092_SRF_2_HR	230	0.614722	17.7899
BERNOULLI	Urban100	img_092_SRF_2_HR	240	0.523818	16.7718
BERNOULLI	Urban100	img_055_SRF_2_HR	150	0.978138	34.8348
BERNOULLI	Urban100	img_055_SRF_2_HR	160	0.973768	33.8236
BERNOULLI	Urban100	img_055_SRF_2_HR	170	0.969308	32.9736
BERNOULLI	Urban100	img_055_SRF_2_HR	180	0.961256	31.7316
BERNOULLI	Urban100	img_055_SRF_2_HR	190	0.952068	30.3692
BERNOULLI	Urban100	img_055_SRF_2_HR	200	0.939721	29.3066
BERNOULLI	Urban100	img_055_SRF_2_HR	210	0.918864	27.5445
BERNOULLI	Urban100	img_055_SRF_2_HR	220	0.893554	26.2481
BERNOULLI	Urban100	img_055_SRF_2_HR	230	0.836902	23.9949
BERNOULLI	Urban100	img_055_SRF_2_HR	240	0.737966	21.5922
BERNOULLI	Urban100	img_075_SRF_2_HR	150	0.963264	34.2346
BERNOULLI	Urban100	img_075_SRF_2_HR	160	0.957558	33.3219
BERNOULLI	Urban100	img_075_SRF_2_HR	170	0.95214	32.6883
BERNOULLI	Urban100	img_075_SRF_2_HR	180	0.944094	31.7409
BERNOULLI	Urban100	img_075_SRF_2_HR	190	0.93672	31.0313
BERNOULLI	Urban100	img_075_SRF_2_HR	200	0.926838	30.215
BERNOULLI	Urban100	img_075_SRF_2_HR	210	0.909421	28.638
BERNOULLI	Urban100	img_075_SRF_2_HR	220	0.888835	27.2884
BERNOULLI	Urban100	img_075_SRF_2_HR	230	0.859948	25.8619
BERNOULLI	Urban100	img_075_SRF_2_HR	240	0.802666	23.5821
BERNOULLI	Urban100	img_036_SRF_2_HR	150	0.962442	31.5005
BERNOULLI	Urban100	img_036_SRF_2_HR	160	0.957072	31.0197
BERNOULLI	Urban100	img_036_SRF_2_HR	170	0.950855	30.1757
BERNOULLI	Urban100	img_036_SRF_2_HR	180	0.939236	29.0954
BERNOULLI	Urban100	img_036_SRF_2_HR	190	0.928466	28.2697
BERNOULLI	Urban100	img_036_SRF_2_HR	200	0.912227	27.2215
BERNOULLI	Urban100	img_036_SRF_2_HR	210	0.887638	25.9273
BERNOULLI	Urban100	img_036_SRF_2_HR	220	0.853254	24.5033
BERNOULLI	Urban100	img_036_SRF_2_HR	230	0.804919	22.9667
BERNOULLI	Urban100	img_036_SRF_2_HR	240	0.705047	20.9263
BERNOULLI	Urban100	img_018_SRF_2_HR	150	0.894125	28.7993
BERNOULLI	Urban100	img_018_SRF_2_HR	160	0.88005	28.2764
BERNOULLI	Urban100	img_018_SRF_2_HR	170	0.862333	27.5647
BERNOULLI	Urban100	img_018_SRF_2_HR	180	0.843121	26.839
BERNOULLI	Urban100	img_018_SRF_2_HR	190	0.818141	26.288
BERNOULLI	Urban100	img_018_SRF_2_HR	200	0.785054	25.3115
BERNOULLI	Urban100	img_018_SRF_2_HR	210	0.748542	24.6198
BERNOULLI	Urban100	img_018_SRF_2_HR	220	0.691528	23.5059
BERNOULLI	Urban100	img_018_SRF_2_HR	230	0.614812	22.358
BERNOULLI	Urban100	img_018_SRF_2_HR	240	0.508541	20.6268
BERNOULLI	Urban100	img_014_SRF_2_HR	150	0.921717	28.2549
BERNOULLI	Urban100	img_014_SRF_2_HR	160	0.911735	27.677
BERNOULLI	Urban100	img_014_SRF_2_HR	170	0.898097	27.1121
BERNOULLI	Urban100	img_014_SRF_2_HR	180	0.880874	26.4564
BERNOULLI	Urban100	img_014_SRF_2_HR	190	0.861747	25.8124
BERNOULLI	Urban100	img_014_SRF_2_HR	200	0.836808	25.0899
BERNOULLI	Urban100	img_014_SRF_2_HR	210	0.807631	24.4244
BERNOULLI	Urban100	img_014_SRF_2_HR	220	0.764288	23.5063
BERNOULLI	Urban100	img_014_SRF_2_HR	230	0.709344	22.6346
BERNOULLI	Urban100	img_014_SRF_2_HR	240	0.620095	21.3347
BERNOULLI	Urban100	img_027_SRF_2_HR	150	0.955424	33.2946
BERNOULLI	Urban100	img_027_SRF_2_HR	160	0.948891	32.559
BERNOULLI	Urban100	img_027_SRF_2_HR	170	0.942326	32.0891
BERNOULLI	Urban100	img_027_SRF_2_HR	180	0.932069	31.4023
BERNOULLI	Urban100	img_027_SRF_2_HR	190	0.919972	30.62
BERNOULLI	Urban100	img_027_SRF_2_HR	200	0.906475	29.868
BERNOULLI	Urban100	img_027_SRF_2_HR	210	0.888732	29.0047
BERNOULLI	Urban100	img_027_SRF_2_HR	220	0.859127	27.7702
BERNOULLI	Urban100	img_027_SRF_2_HR	230	0.820331	26.7213
BERNOULLI	Urban100	img_027_SRF_2_HR	240	0.746161	24.9068
BERNOULLI	Urban100	img_042_SRF_2_HR	150	0.968231	30.9098
BERNOULLI	Urban100	img_042_SRF_2_HR	160	0.963141	30.1015
BERNOULLI	Urban100	img_042_SRF_2_HR	170	0.956426	29.2945
BERNOULLI	Urban100	img_042_SRF_2_HR	180	0.947239	28.3276
BERNOULLI	Urban100	img_042_SRF_2_HR	190	0.936067	27.4039
BERNOULLI	Urban100	img_042_SRF_2_HR	200	0.921522	26.3466
BERNOULLI	Urban100	img_042_SRF_2_HR	210	0.894749	24.8889
BERNOULLI	Urban100	img_042_SRF_2_HR	220	0.86226	23.7066
BERNOULLI	Urban100	img_042_SRF_2_HR	230	0.802009	21.9149
[truncated: 4,937 more rows]
