# Supplementary material for: MPDenoiseNet: Resource-Efficient Deep Learning Approach for Image Denoising
Source: Research Square preprint supplement (doi:10.21203/rs.3.rs-6641644/v1), 2025-05-20
Supplement: Supplementary file 7 [file ablation_no_transformer.xlsx]

## Sheet: Sheet1
noise_type	dataset	im_index	noise_parameter	SSIM	PSNR
BERNOULLI	Kodak24	kodim12	150	0.927807	32.8005
BERNOULLI	Kodak24	kodim12	160	0.918235	32.3483
BERNOULLI	Kodak24	kodim12	170	0.907913	31.8689
BERNOULLI	Kodak24	kodim12	180	0.897278	31.3689
BERNOULLI	Kodak24	kodim12	190	0.883327	30.9268
BERNOULLI	Kodak24	kodim12	200	0.865086	30.1722
BERNOULLI	Kodak24	kodim12	210	0.845117	29.406
BERNOULLI	Kodak24	kodim12	220	0.819858	28.4909
BERNOULLI	Kodak24	kodim12	230	0.792688	27.5679
BERNOULLI	Kodak24	kodim12	240	0.750366	26.0068
BERNOULLI	Kodak24	kodim09	150	0.939926	32.0703
BERNOULLI	Kodak24	kodim09	160	0.933912	31.6946
BERNOULLI	Kodak24	kodim09	170	0.926946	31.3288
BERNOULLI	Kodak24	kodim09	180	0.917589	30.6544
BERNOULLI	Kodak24	kodim09	190	0.906466	30.1025
BERNOULLI	Kodak24	kodim09	200	0.895053	29.4899
BERNOULLI	Kodak24	kodim09	210	0.879238	28.76
BERNOULLI	Kodak24	kodim09	220	0.859212	27.9833
BERNOULLI	Kodak24	kodim09	230	0.829724	26.8171
BERNOULLI	Kodak24	kodim09	240	0.784987	25.1988
BERNOULLI	Kodak24	kodim20	150	0.937732	30.5263
BERNOULLI	Kodak24	kodim20	160	0.929899	30.183
BERNOULLI	Kodak24	kodim20	170	0.922584	29.824
BERNOULLI	Kodak24	kodim20	180	0.913202	29.2288
BERNOULLI	Kodak24	kodim20	190	0.901965	28.8141
BERNOULLI	Kodak24	kodim20	200	0.889436	27.8559
BERNOULLI	Kodak24	kodim20	210	0.875509	27.4302
BERNOULLI	Kodak24	kodim20	220	0.856653	26.6842
BERNOULLI	Kodak24	kodim20	230	0.833703	25.8212
BERNOULLI	Kodak24	kodim20	240	0.799354	24.5807
BERNOULLI	Kodak24	kodim07	150	0.963361	32.2531
BERNOULLI	Kodak24	kodim07	160	0.958929	31.8312
BERNOULLI	Kodak24	kodim07	170	0.953861	31.451
BERNOULLI	Kodak24	kodim07	180	0.945715	30.8116
BERNOULLI	Kodak24	kodim07	190	0.937306	30.2824
BERNOULLI	Kodak24	kodim07	200	0.924934	29.5269
BERNOULLI	Kodak24	kodim07	210	0.909699	28.8703
BERNOULLI	Kodak24	kodim07	220	0.886357	27.7729
BERNOULLI	Kodak24	kodim07	230	0.851586	26.7156
BERNOULLI	Kodak24	kodim07	240	0.787207	24.9684
BERNOULLI	Kodak24	kodim02	150	0.907178	31.5226
BERNOULLI	Kodak24	kodim02	160	0.895757	31.2048
BERNOULLI	Kodak24	kodim02	170	0.883252	30.9652
BERNOULLI	Kodak24	kodim02	180	0.870319	30.7054
BERNOULLI	Kodak24	kodim02	190	0.854048	30.4036
BERNOULLI	Kodak24	kodim02	200	0.835696	30.0385
BERNOULLI	Kodak24	kodim02	210	0.814394	29.703
BERNOULLI	Kodak24	kodim02	220	0.784781	29.0396
BERNOULLI	Kodak24	kodim02	230	0.754685	28.5669
BERNOULLI	Kodak24	kodim02	240	0.71533	27.7452
BERNOULLI	Kodak24	kodim01	150	0.867217	27.3168
BERNOULLI	Kodak24	kodim01	160	0.848239	26.7554
BERNOULLI	Kodak24	kodim01	170	0.828409	26.2797
BERNOULLI	Kodak24	kodim01	180	0.802969	25.6778
BERNOULLI	Kodak24	kodim01	190	0.775646	25.1599
BERNOULLI	Kodak24	kodim01	200	0.744702	24.5713
BERNOULLI	Kodak24	kodim01	210	0.705766	23.9601
BERNOULLI	Kodak24	kodim01	220	0.659059	23.2505
BERNOULLI	Kodak24	kodim01	230	0.591903	22.2277
BERNOULLI	Kodak24	kodim01	240	0.503971	21.0761
BERNOULLI	Kodak24	kodim11	150	0.905225	29.4441
BERNOULLI	Kodak24	kodim11	160	0.893256	29.003
BERNOULLI	Kodak24	kodim11	170	0.877671	28.4547
BERNOULLI	Kodak24	kodim11	180	0.862676	28.0729
BERNOULLI	Kodak24	kodim11	190	0.83937	27.3901
BERNOULLI	Kodak24	kodim11	200	0.816582	26.9103
BERNOULLI	Kodak24	kodim11	210	0.787684	26.2381
BERNOULLI	Kodak24	kodim11	220	0.748946	25.4369
BERNOULLI	Kodak24	kodim11	230	0.704574	24.7277
BERNOULLI	Kodak24	kodim11	240	0.641952	23.7004
BERNOULLI	Kodak24	kodim19	150	0.909313	31.1228
BERNOULLI	Kodak24	kodim19	160	0.897824	30.4843
BERNOULLI	Kodak24	kodim19	170	0.885229	29.8191
BERNOULLI	Kodak24	kodim19	180	0.869406	29.1711
BERNOULLI	Kodak24	kodim19	190	0.852916	28.4447
BERNOULLI	Kodak24	kodim19	200	0.832093	27.5545
BERNOULLI	Kodak24	kodim19	210	0.80749	26.6871
BERNOULLI	Kodak24	kodim19	220	0.774137	25.634
BERNOULLI	Kodak24	kodim19	230	0.734075	24.4907
BERNOULLI	Kodak24	kodim19	240	0.668783	22.8126
BERNOULLI	Kodak24	kodim05	150	0.912363	27.0631
BERNOULLI	Kodak24	kodim05	160	0.896771	26.4227
BERNOULLI	Kodak24	kodim05	170	0.881265	25.8653
BERNOULLI	Kodak24	kodim05	180	0.860457	25.2313
BERNOULLI	Kodak24	kodim05	190	0.83681	24.5838
BERNOULLI	Kodak24	kodim05	200	0.806034	23.8733
BERNOULLI	Kodak24	kodim05	210	0.768674	23.1247
BERNOULLI	Kodak24	kodim05	220	0.716872	22.2343
BERNOULLI	Kodak24	kodim05	230	0.646147	21.1385
BERNOULLI	Kodak24	kodim05	240	0.551482	19.9048
BERNOULLI	Kodak24	kodim04	150	0.920656	31.8837
BERNOULLI	Kodak24	kodim04	160	0.911635	31.5432
BERNOULLI	Kodak24	kodim04	170	0.900516	31.1209
BERNOULLI	Kodak24	kodim04	180	0.886962	30.7431
BERNOULLI	Kodak24	kodim04	190	0.87392	30.3636
BERNOULLI	Kodak24	kodim04	200	0.856431	29.9516
BERNOULLI	Kodak24	kodim04	210	0.835796	29.3265
BERNOULLI	Kodak24	kodim04	220	0.811565	28.7436
BERNOULLI	Kodak24	kodim04	230	0.779646	27.9838
BERNOULLI	Kodak24	kodim04	240	0.731361	26.7425
BERNOULLI	Kodak24	kodim15	150	0.92368	30.8884
BERNOULLI	Kodak24	kodim15	160	0.915668	30.5788
BERNOULLI	Kodak24	kodim15	170	0.905917	30.2927
BERNOULLI	Kodak24	kodim15	180	0.895468	30.0788
BERNOULLI	Kodak24	kodim15	190	0.883634	29.6533
BERNOULLI	Kodak24	kodim15	200	0.87028	29.2445
BERNOULLI	Kodak24	kodim15	210	0.851495	28.6983
BERNOULLI	Kodak24	kodim15	220	0.832025	28.0605
BERNOULLI	Kodak24	kodim15	230	0.803438	27.0105
BERNOULLI	Kodak24	kodim15	240	0.767582	25.4155
BERNOULLI	Kodak24	kodim21	150	0.915074	28.5935
BERNOULLI	Kodak24	kodim21	160	0.904496	28.139
BERNOULLI	Kodak24	kodim21	170	0.893993	27.7839
BERNOULLI	Kodak24	kodim21	180	0.878171	27.1509
BERNOULLI	Kodak24	kodim21	190	0.861816	26.5549
BERNOULLI	Kodak24	kodim21	200	0.843408	26.0333
BERNOULLI	Kodak24	kodim21	210	0.819899	25.3977
BERNOULLI	Kodak24	kodim21	220	0.790133	24.6639
BERNOULLI	Kodak24	kodim21	230	0.752355	23.8579
BERNOULLI	Kodak24	kodim21	240	0.69651	22.7572
BERNOULLI	Kodak24	kodim10	150	0.940014	31.7684
BERNOULLI	Kodak24	kodim10	160	0.932526	31.3053
BERNOULLI	Kodak24	kodim10	170	0.92306	30.7494
BERNOULLI	Kodak24	kodim10	180	0.912548	30.116
BERNOULLI	Kodak24	kodim10	190	0.900911	29.4838
BERNOULLI	Kodak24	kodim10	200	0.885781	28.8415
BERNOULLI	Kodak24	kodim10	210	0.864528	28.1511
BERNOULLI	Kodak24	kodim10	220	0.841702	27.3211
BERNOULLI	Kodak24	kodim10	230	0.808033	26.4072
BERNOULLI	Kodak24	kodim10	240	0.757093	25.2727
BERNOULLI	Kodak24	kodim08	150	0.891706	25.5148
BERNOULLI	Kodak24	kodim08	160	0.87724	24.926
BERNOULLI	Kodak24	kodim08	170	0.858966	24.2561
BERNOULLI	Kodak24	kodim08	180	0.840623	23.759
BERNOULLI	Kodak24	kodim08	190	0.814083	23.0417
BERNOULLI	Kodak24	kodim08	200	0.78479	22.3562
BERNOULLI	Kodak24	kodim08	210	0.745489	21.4565
BERNOULLI	Kodak24	kodim08	220	0.697728	20.576
BERNOULLI	Kodak24	kodim08	230	0.6354	19.526
BERNOULLI	Kodak24	kodim08	240	0.534764	18.0514
BERNOULLI	Kodak24	kodim03	150	0.944636	32.0087
BERNOULLI	Kodak24	kodim03	160	0.937709	31.7297
BERNOULLI	Kodak24	kodim03	170	0.930497	31.4217
BERNOULLI	Kodak24	kodim03	180	0.922685	31.218
BERNOULLI	Kodak24	kodim03	190	0.91059	30.8979
BERNOULLI	Kodak24	kodim03	200	0.898407	30.4616
BERNOULLI	Kodak24	kodim03	210	0.884828	30.1958
BERNOULLI	Kodak24	kodim03	220	0.864378	29.5727
BERNOULLI	Kodak24	kodim03	230	0.840897	28.9114
BERNOULLI	Kodak24	kodim03	240	0.802407	27.8755
BERNOULLI	Kodak24	kodim24	150	0.902411	27.2513
BERNOULLI	Kodak24	kodim24	160	0.888155	26.6207
BERNOULLI	Kodak24	kodim24	170	0.87222	26.0644
BERNOULLI	Kodak24	kodim24	180	0.853513	25.5613
BERNOULLI	Kodak24	kodim24	190	0.833128	25.1153
BERNOULLI	Kodak24	kodim24	200	0.806239	24.4448
BERNOULLI	Kodak24	kodim24	210	0.775026	23.8911
BERNOULLI	Kodak24	kodim24	220	0.737333	23.3455
BERNOULLI	Kodak24	kodim24	230	0.682136	22.4647
BERNOULLI	Kodak24	kodim24	240	0.609083	21.5618
BERNOULLI	Kodak24	kodim17	150	0.940557	32.8033
BERNOULLI	Kodak24	kodim17	160	0.933791	32.2318
BERNOULLI	Kodak24	kodim17	170	0.925394	31.6986
BERNOULLI	Kodak24	kodim17	180	0.915758	31.1041
BERNOULLI	Kodak24	kodim17	190	0.905426	30.6542
BERNOULLI	Kodak24	kodim17	200	0.8886	29.7597
BERNOULLI	Kodak24	kodim17	210	0.871649	29.1727
BERNOULLI	Kodak24	kodim17	220	0.845707	28.1834
BERNOULLI	Kodak24	kodim17	230	0.809928	27.0233
BERNOULLI	Kodak24	kodim17	240	0.757099	25.7285
BERNOULLI	Kodak24	kodim23	150	0.959978	32.8435
BERNOULLI	Kodak24	kodim23	160	0.956083	32.6028
BERNOULLI	Kodak24	kodim23	170	0.951443	32.2144
BERNOULLI	Kodak24	kodim23	180	0.945069	31.7284
BERNOULLI	Kodak24	kodim23	190	0.938385	31.3759
BERNOULLI	Kodak24	kodim23	200	0.930756	30.8935
BERNOULLI	Kodak24	kodim23	210	0.920572	30.3014
BERNOULLI	Kodak24	kodim23	220	0.905628	29.5359
BERNOULLI	Kodak24	kodim23	230	0.88739	28.5015
BERNOULLI	Kodak24	kodim23	240	0.851609	26.9005
BERNOULLI	Kodak24	kodim06	150	0.896435	28.2675
BERNOULLI	Kodak24	kodim06	160	0.882464	27.8104
BERNOULLI	Kodak24	kodim06	170	0.867557	27.426
BERNOULLI	Kodak24	kodim06	180	0.846015	26.8553
BERNOULLI	Kodak24	kodim06	190	0.824632	26.4192
BERNOULLI	Kodak24	kodim06	200	0.793493	25.7806
BERNOULLI	Kodak24	kodim06	210	0.761769	25.2067
BERNOULLI	Kodak24	kodim06	220	0.717855	24.4395
BERNOULLI	Kodak24	kodim06	230	0.663169	23.6462
BERNOULLI	Kodak24	kodim06	240	0.589175	22.6046
BERNOULLI	Kodak24	kodim16	150	0.914412	30.255
BERNOULLI	Kodak24	kodim16	160	0.904568	29.9843
BERNOULLI	Kodak24	kodim16	170	0.89051	29.7079
BERNOULLI	Kodak24	kodim16	180	0.873417	29.381
BERNOULLI	Kodak24	kodim16	190	0.853719	28.9792
BERNOULLI	Kodak24	kodim16	200	0.830562	28.5902
BERNOULLI	Kodak24	kodim16	210	0.80338	28.1507
BERNOULLI	Kodak24	kodim16	220	0.771567	27.6983
BERNOULLI	Kodak24	kodim16	230	0.728329	27.127
BERNOULLI	Kodak24	kodim16	240	0.673286	26.253
BERNOULLI	Kodak24	kodim22	150	0.90048	30.552
BERNOULLI	Kodak24	kodim22	160	0.889275	30.0803
BERNOULLI	Kodak24	kodim22	170	0.875673	29.7049
BERNOULLI	Kodak24	kodim22	180	0.858043	29.119
BERNOULLI	Kodak24	kodim22	190	0.836489	28.5184
BERNOULLI	Kodak24	kodim22	200	0.814784	27.9645
BERNOULLI	Kodak24	kodim22	210	0.78765	27.4984
BERNOULLI	Kodak24	kodim22	220	0.754187	26.7128
BERNOULLI	Kodak24	kodim22	230	0.706998	25.9823
BERNOULLI	Kodak24	kodim22	240	0.648197	24.9194
BERNOULLI	Kodak24	kodim13	150	0.819051	24.0339
BERNOULLI	Kodak24	kodim13	160	0.796674	23.5553
BERNOULLI	Kodak24	kodim13	170	0.769741	23.1007
BERNOULLI	Kodak24	kodim13	180	0.741799	22.6677
BERNOULLI	Kodak24	kodim13	190	0.706272	22.1246
BERNOULLI	Kodak24	kodim13	200	0.668236	21.6268
BERNOULLI	Kodak24	kodim13	210	0.624078	21.0492
BERNOULLI	Kodak24	kodim13	220	0.571398	20.4813
BERNOULLI	Kodak24	kodim13	230	0.504734	19.8619
BERNOULLI	Kodak24	kodim13	240	0.422647	19.0592
BERNOULLI	Kodak24	kodim18	150	0.893697	28.3877
BERNOULLI	Kodak24	kodim18	160	0.878327	27.8477
BERNOULLI	Kodak24	kodim18	170	0.862084	27.3202
BERNOULLI	Kodak24	kodim18	180	0.843708	26.7624
BERNOULLI	Kodak24	kodim18	190	0.819811	26.1932
BERNOULLI	Kodak24	kodim18	200	0.790477	25.5652
BERNOULLI	Kodak24	kodim18	210	0.756195	24.8684
BERNOULLI	Kodak24	kodim18	220	0.712251	24.1255
BERNOULLI	Kodak24	kodim18	230	0.661328	23.4403
BERNOULLI	Kodak24	kodim18	240	0.581136	22.2104
BERNOULLI	Kodak24	kodim14	150	0.897227	28.509
BERNOULLI	Kodak24	kodim14	160	0.883503	28.0967
BERNOULLI	Kodak24	kodim14	170	0.866779	27.683
BERNOULLI	Kodak24	kodim14	180	0.848472	27.222
BERNOULLI	Kodak24	kodim14	190	0.825191	26.7512
BERNOULLI	Kodak24	kodim14	200	0.799359	26.247
BERNOULLI	Kodak24	kodim14	210	0.767575	25.6536
BERNOULLI	Kodak24	kodim14	220	0.724305	24.8161
BERNOULLI	Kodak24	kodim14	230	0.672528	24.1025
BERNOULLI	Kodak24	kodim14	240	0.59123	22.9019
BERNOULLI	BSD68	66	150	0.91143	30.485
BERNOULLI	BSD68	66	160	0.898915	29.6548
BERNOULLI	BSD68	66	170	0.883943	29.0309
BERNOULLI	BSD68	66	180	0.868695	28.4325
BERNOULLI	BSD68	66	190	0.852347	27.979
BERNOULLI	BSD68	66	200	0.8321	27.3697
BERNOULLI	BSD68	66	210	0.803634	26.3769
BERNOULLI	BSD68	66	220	0.771044	25.5833
BERNOULLI	BSD68	66	230	0.734077	24.6768
BERNOULLI	BSD68	66	240	0.672572	23.5591
BERNOULLI	BSD68	57	150	0.758818	22.4391
BERNOULLI	BSD68	57	160	0.73398	22.0628
BERNOULLI	BSD68	57	170	0.703695	21.6703
BERNOULLI	BSD68	57	180	0.669709	21.2397
BERNOULLI	BSD68	57	190	0.627718	20.7513
BERNOULLI	BSD68	57	200	0.586697	20.3272
BERNOULLI	BSD68	57	210	0.536055	19.8979
BERNOULLI	BSD68	57	220	0.479236	19.3987
BERNOULLI	BSD68	57	230	0.416276	18.8772
BERNOULLI	BSD68	57	240	0.326362	18.1275
BERNOULLI	BSD68	26	150	0.877853	24.2496
BERNOULLI	BSD68	26	160	0.86123	23.6501
BERNOULLI	BSD68	26	170	0.842447	23.0914
BERNOULLI	BSD68	26	180	0.818815	22.3928
BERNOULLI	BSD68	26	190	0.792088	21.8282
BERNOULLI	BSD68	26	200	0.757751	21.1247
BERNOULLI	BSD68	26	210	0.722419	20.5997
BERNOULLI	BSD68	26	220	0.668775	19.7287
BERNOULLI	BSD68	26	230	0.609198	18.9492
BERNOULLI	BSD68	26	240	0.507553	17.6548
BERNOULLI	BSD68	21	150	0.878319	27.045
BERNOULLI	BSD68	21	160	0.85911	26.4745
BERNOULLI	BSD68	21	170	0.836733	25.7457
BERNOULLI	BSD68	21	180	0.820399	25.383
BERNOULLI	BSD68	21	190	0.794841	24.8357
BERNOULLI	BSD68	21	200	0.760227	24.1573
BERNOULLI	BSD68	21	210	0.732315	23.7275
BERNOULLI	BSD68	21	220	0.686098	22.9719
BERNOULLI	BSD68	21	230	0.630781	22.1479
BERNOULLI	BSD68	21	240	0.562738	21.2456
BERNOULLI	BSD68	50	150	0.916926	33.5314
BERNOULLI	BSD68	50	160	0.910091	33.2207
BERNOULLI	BSD68	50	170	0.896454	32.6009
BERNOULLI	BSD68	50	180	0.885713	32.094
BERNOULLI	BSD68	50	190	0.873682	31.5273
BERNOULLI	BSD68	50	200	0.857507	31.0082
BERNOULLI	BSD68	50	210	0.839735	30.4014
BERNOULLI	BSD68	50	220	0.818095	29.7913
BERNOULLI	BSD68	50	230	0.789024	28.834
BERNOULLI	BSD68	50	240	0.750419	27.4984
BERNOULLI	BSD68	12	150	0.894371	28.1039
BERNOULLI	BSD68	12	160	0.878949	27.5303
BERNOULLI	BSD68	12	170	0.863863	27.0863
BERNOULLI	BSD68	12	180	0.844398	26.4625
BERNOULLI	BSD68	12	190	0.821315	25.9566
BERNOULLI	BSD68	12	200	0.797513	25.4102
BERNOULLI	BSD68	12	210	0.76333	24.7306
BERNOULLI	BSD68	12	220	0.729229	24.2024
BERNOULLI	BSD68	12	230	0.679437	23.4301
BERNOULLI	BSD68	12	240	0.602546	22.2124
BERNOULLI	BSD68	5	150	0.886719	29.2968
BERNOULLI	BSD68	5	160	0.874662	28.7337
BERNOULLI	BSD68	5	170	0.859851	28.2191
BERNOULLI	BSD68	5	180	0.842142	27.3748
BERNOULLI	BSD68	5	190	0.822565	26.8363
BERNOULLI	BSD68	5	200	0.798325	26.0584
BERNOULLI	BSD68	5	210	0.771197	25.3065
BERNOULLI	BSD68	5	220	0.736631	24.4768
BERNOULLI	BSD68	5	230	0.690856	23.3466
BERNOULLI	BSD68	5	240	0.626625	22.059
BERNOULLI	BSD68	11	150	0.953131	33.4547
BERNOULLI	BSD68	11	160	0.946265	32.8728
BERNOULLI	BSD68	11	170	0.937535	32.2298
BERNOULLI	BSD68	11	180	0.926845	31.6121
BERNOULLI	BSD68	11	190	0.914754	30.9836
BERNOULLI	BSD68	11	200	0.897551	30.2225
BERNOULLI	BSD68	11	210	0.878477	29.6807
BERNOULLI	BSD68	11	220	0.847902	28.603
BERNOULLI	BSD68	11	230	0.803601	27.3929
BERNOULLI	BSD68	11	240	0.744276	26.1428
BERNOULLI	BSD68	39	150	0.745004	28.8367
BERNOULLI	BSD68	39	160	0.720752	28.46
BERNOULLI	BSD68	39	170	0.694819	28.0929
BERNOULLI	BSD68	39	180	0.661847	27.7902
BERNOULLI	BSD68	39	190	0.633345	27.4507
BERNOULLI	BSD68	39	200	0.594509	27.0306
BERNOULLI	BSD68	39	210	0.551687	26.5114
BERNOULLI	BSD68	39	220	0.515157	26.2036
BERNOULLI	BSD68	39	230	0.469708	25.8549
BERNOULLI	BSD68	39	240	0.421341	25.125
BERNOULLI	BSD68	63	150	0.969247	35.6972
BERNOULLI	BSD68	63	160	0.966132	34.7556
BERNOULLI	BSD68	63	170	0.961707	33.7406
BERNOULLI	BSD68	63	180	0.956828	33.0123
BERNOULLI	BSD68	63	190	0.951143	31.921
BERNOULLI	BSD68	63	200	0.94656	31.3295
BERNOULLI	BSD68	63	210	0.935412	29.1915
BERNOULLI	BSD68	63	220	0.922319	27.8647
BERNOULLI	BSD68	63	230	0.897641	25.5595
BERNOULLI	BSD68	63	240	0.852481	22.4525
BERNOULLI	BSD68	45	150	0.958425	30.7072
BERNOULLI	BSD68	45	160	0.952983	29.9473
BERNOULLI	BSD68	45	170	0.944524	29.3839
BERNOULLI	BSD68	45	180	0.935528	28.6566
BERNOULLI	BSD68	45	190	0.923733	27.9604
BERNOULLI	BSD68	45	200	0.907677	26.8828
BERNOULLI	BSD68	45	210	0.888903	26.0644
BERNOULLI	BSD68	45	220	0.864002	24.9666
BERNOULLI	BSD68	45	230	0.822187	23.6613
BERNOULLI	BSD68	45	240	0.750898	21.8672
BERNOULLI	BSD68	60	150	0.888104	32.1992
BERNOULLI	BSD68	60	160	0.876493	31.7845
BERNOULLI	BSD68	60	170	0.861738	31.2371
BERNOULLI	BSD68	60	180	0.848028	30.8618
BERNOULLI	BSD68	60	190	0.832608	30.331
BERNOULLI	BSD68	60	200	0.81148	29.7067
BERNOULLI	BSD68	60	210	0.792822	29.2629
BERNOULLI	BSD68	60	220	0.76617	28.6118
BERNOULLI	BSD68	60	230	0.73518	27.905
BERNOULLI	BSD68	60	240	0.690858	26.6961
BERNOULLI	BSD68	9	150	0.926919	30.3002
BERNOULLI	BSD68	9	160	0.91871	29.7712
BERNOULLI	BSD68	9	170	0.909297	29.2373
BERNOULLI	BSD68	9	180	0.894306	28.478
BERNOULLI	BSD68	9	190	0.878346	27.9229
BERNOULLI	BSD68	9	200	0.862611	27.1407
BERNOULLI	BSD68	9	210	0.842087	26.635
BERNOULLI	BSD68	9	220	0.816365	26.021
BERNOULLI	BSD68	9	230	0.782811	24.9017
BERNOULLI	BSD68	9	240	0.732334	23.7664
BERNOULLI	BSD68	18	150	0.916422	28.2193
BERNOULLI	BSD68	18	160	0.906231	27.6902
BERNOULLI	BSD68	18	170	0.892041	26.9905
BERNOULLI	BSD68	18	180	0.873514	26.1799
BERNOULLI	BSD68	18	190	0.852532	25.5175
BERNOULLI	BSD68	18	200	0.83053	24.9317
BERNOULLI	BSD68	18	210	0.791749	23.7082
BERNOULLI	BSD68	18	220	0.748418	22.869
BERNOULLI	BSD68	18	230	0.684643	21.5822
BERNOULLI	BSD68	18	240	0.600082	20.0687
BERNOULLI	BSD68	7	150	0.868285	23.5969
BERNOULLI	BSD68	7	160	0.85076	22.9725
BERNOULLI	BSD68	7	170	0.828342	22.4222
BERNOULLI	BSD68	7	180	0.804405	21.8869
BERNOULLI	BSD68	7	190	0.776137	21.2238
BERNOULLI	BSD68	7	200	0.737282	20.5178
BERNOULLI	BSD68	7	210	0.697258	19.9392
BERNOULLI	BSD68	7	220	0.639533	19.0587
BERNOULLI	BSD68	7	230	0.571328	18.2992
BERNOULLI	BSD68	7	240	0.467186	17.0994
BERNOULLI	BSD68	59	150	0.901923	33.5252
BERNOULLI	BSD68	59	160	0.892273	33.1193
BERNOULLI	BSD68	59	170	0.880408	32.6617
BERNOULLI	BSD68	59	180	0.866172	32.2304
BERNOULLI	BSD68	59	190	0.851146	31.7333
BERNOULLI	BSD68	59	200	0.832614	31.1364
BERNOULLI	BSD68	59	210	0.813079	30.7299
BERNOULLI	BSD68	59	220	0.790333	30.15
BERNOULLI	BSD68	59	230	0.758936	29.4133
BERNOULLI	BSD68	59	240	0.718546	28.6253
BERNOULLI	BSD68	0	150	0.983592	40.8031
BERNOULLI	BSD68	0	160	0.982227	40.045
BERNOULLI	BSD68	0	170	0.98048	39.4586
BERNOULLI	BSD68	0	180	0.978032	38.3326
BERNOULLI	BSD68	0	190	0.975954	37.9661
BERNOULLI	BSD68	0	200	0.972794	37.0098
BERNOULLI	BSD68	0	210	0.970113	36.7195
BERNOULLI	BSD68	0	220	0.964629	35.2138
BERNOULLI	BSD68	0	230	0.956548	33.6471
BERNOULLI	BSD68	0	240	0.942764	32.3104
BERNOULLI	BSD68	30	150	0.946563	29.7233
BERNOULLI	BSD68	30	160	0.938601	29.2616
BERNOULLI	BSD68	30	170	0.930893	28.664
BERNOULLI	BSD68	30	180	0.921515	28.0133
BERNOULLI	BSD68	30	190	0.907269	27.1179
BERNOULLI	BSD68	30	200	0.89192	26.4698
BERNOULLI	BSD68	30	210	0.873728	25.7339
BERNOULLI	BSD68	30	220	0.852105	24.8751
BERNOULLI	BSD68	30	230	0.811508	23.811
BERNOULLI	BSD68	30	240	0.763491	22.5181
BERNOULLI	BSD68	53	150	0.925008	34.6789
BERNOULLI	BSD68	53	160	0.91404	33.8784
BERNOULLI	BSD68	53	170	0.905082	33.539
BERNOULLI	BSD68	53	180	0.895065	32.9687
BERNOULLI	BSD68	53	190	0.8807	32.1775
BERNOULLI	BSD68	53	200	0.866268	31.6722
BERNOULLI	BSD68	53	210	0.848803	30.851
BERNOULLI	BSD68	53	220	0.82705	30.1783
BERNOULLI	BSD68	53	230	0.800972	29.4862
BERNOULLI	BSD68	53	240	0.764704	28.4076
BERNOULLI	BSD68	49	150	0.876887	27.1898
BERNOULLI	BSD68	49	160	0.860931	26.6769
BERNOULLI	BSD68	49	170	0.840477	26.0592
BERNOULLI	BSD68	49	180	0.818143	25.5378
BERNOULLI	BSD68	49	190	0.791387	25.045
BERNOULLI	BSD68	49	200	0.756108	24.4147
BERNOULLI	BSD68	49	210	0.71535	23.7049
BERNOULLI	BSD68	49	220	0.66954	23.1162
BERNOULLI	BSD68	49	230	0.598647	22.1963
BERNOULLI	BSD68	49	240	0.506538	21.3855
BERNOULLI	BSD68	41	150	0.918892	31.4506
BERNOULLI	BSD68	41	160	0.908287	30.8484
BERNOULLI	BSD68	41	170	0.892581	30.1282
BERNOULLI	BSD68	41	180	0.875923	29.5483
BERNOULLI	BSD68	41	190	0.852247	28.7093
BERNOULLI	BSD68	41	200	0.822483	27.9564
BERNOULLI	BSD68	41	210	0.788209	27.1588
BERNOULLI	BSD68	41	220	0.74452	26.3058
BERNOULLI	BSD68	41	230	0.687427	25.3826
BERNOULLI	BSD68	41	240	0.604033	24.1743
BERNOULLI	BSD68	17	150	0.926825	31.5054
BERNOULLI	BSD68	17	160	0.917288	30.9768
BERNOULLI	BSD68	17	170	0.904876	30.3316
BERNOULLI	BSD68	17	180	0.891703	29.8571
BERNOULLI	BSD68	17	190	0.874963	29.2648
BERNOULLI	BSD68	17	200	0.857982	28.7448
BERNOULLI	BSD68	17	210	0.833511	27.9807
BERNOULLI	BSD68	17	220	0.800489	27.1643
BERNOULLI	BSD68	17	230	0.756082	26.2238
BERNOULLI	BSD68	17	240	0.689595	25.0741
BERNOULLI	BSD68	48	150	0.85544	24.8385
BERNOULLI	BSD68	48	160	0.83912	24.2882
BERNOULLI	BSD68	48	170	0.816279	23.6747
BERNOULLI	BSD68	48	180	0.790372	23.0754
BERNOULLI	BSD68	48	190	0.760931	22.572
BERNOULLI	BSD68	48	200	0.729142	22.0147
BERNOULLI	BSD68	48	210	0.678509	21.0922
BERNOULLI	BSD68	48	220	0.637926	20.6352
BERNOULLI	BSD68	48	230	0.559334	19.5893
BERNOULLI	BSD68	48	240	0.470479	18.5664
BERNOULLI	BSD68	31	150	0.931939	32.5857
BERNOULLI	BSD68	31	160	0.921362	31.9564
BERNOULLI	BSD68	31	170	0.910145	31.3759
BERNOULLI	BSD68	31	180	0.895544	30.6399
BERNOULLI	BSD68	31	190	0.880296	29.9767
BERNOULLI	BSD68	31	200	0.858884	29.1905
BERNOULLI	BSD68	31	210	0.836965	28.5434
BERNOULLI	BSD68	31	220	0.81013	27.7624
BERNOULLI	BSD68	31	230	0.767728	26.7888
BERNOULLI	BSD68	31	240	0.69629	25.2265
BERNOULLI	BSD68	27	150	0.881847	26.927
BERNOULLI	BSD68	27	160	0.866599	26.4789
BERNOULLI	BSD68	27	170	0.846784	25.7513
BERNOULLI	BSD68	27	180	0.821601	25.0706
BERNOULLI	BSD68	27	190	0.795053	24.4045
BERNOULLI	BSD68	27	200	0.75845	23.554
BERNOULLI	BSD68	27	210	0.720274	22.8786
BERNOULLI	BSD68	27	220	0.660118	21.8601
BERNOULLI	BSD68	27	230	0.59698	20.9387
BERNOULLI	BSD68	27	240	0.490109	19.6739
BERNOULLI	BSD68	47	150	0.944417	37.1337
BERNOULLI	BSD68	47	160	0.93672	36.488
BERNOULLI	BSD68	47	170	0.930381	36.0481
BERNOULLI	BSD68	47	180	0.919687	35.4294
BERNOULLI	BSD68	47	190	0.907301	34.6715
BERNOULLI	BSD68	47	200	0.89467	34.0799
BERNOULLI	BSD68	47	210	0.880891	33.4372
BERNOULLI	BSD68	47	220	0.857993	32.4463
BERNOULLI	BSD68	47	230	0.832397	31.5561
BERNOULLI	BSD68	47	240	0.801504	30.5856
BERNOULLI	BSD68	36	150	0.901598	27.8499
BERNOULLI	BSD68	36	160	0.888161	27.4201
BERNOULLI	BSD68	36	170	0.869829	26.7359
BERNOULLI	BSD68	36	180	0.848939	26.024
BERNOULLI	BSD68	36	190	0.820194	25.3047
BERNOULLI	BSD68	36	200	0.790718	24.6873
BERNOULLI	BSD68	36	210	0.751459	23.9436
BERNOULLI	BSD68	36	220	0.690654	22.9248
BERNOULLI	BSD68	36	230	0.621429	22.0201
BERNOULLI	BSD68	36	240	0.507416	20.6599
BERNOULLI	BSD68	43	150	0.879213	27.4508
BERNOULLI	BSD68	43	160	0.866377	27.0642
BERNOULLI	BSD68	43	170	0.848629	26.3683
BERNOULLI	BSD68	43	180	0.828835	25.9021
BERNOULLI	BSD68	43	190	0.80685	25.1879
BERNOULLI	BSD68	43	200	0.779482	24.6538
BERNOULLI	BSD68	43	210	0.752215	24.0599
BERNOULLI	BSD68	43	220	0.714198	23.3296
BERNOULLI	BSD68	43	230	0.669191	22.4817
BERNOULLI	BSD68	43	240	0.603379	21.3421
BERNOULLI	BSD68	4	150	0.894079	28.8443
BERNOULLI	BSD68	4	160	0.883458	28.3337
BERNOULLI	BSD68	4	170	0.866824	27.7136
BERNOULLI	BSD68	4	180	0.846817	26.9766
BERNOULLI	BSD68	4	190	0.826907	26.3761
BERNOULLI	BSD68	4	200	0.803089	25.7353
BERNOULLI	BSD68	4	210	0.778325	25.1426
BERNOULLI	BSD68	4	220	0.736005	24.27
BERNOULLI	BSD68	4	230	0.693433	23.3293
BERNOULLI	BSD68	4	240	0.61671	22.0254
BERNOULLI	BSD68	64	150	0.894133	26.3682
BERNOULLI	BSD68	64	160	0.879019	25.8697
BERNOULLI	BSD68	64	170	0.862017	25.3277
BERNOULLI	BSD68	64	180	0.84057	24.8288
BERNOULLI	BSD68	64	190	0.818926	24.2999
BERNOULLI	BSD68	64	200	0.788974	23.5929
BERNOULLI	BSD68	64	210	0.750177	23.0751
BERNOULLI	BSD68	64	220	0.703478	22.39
BERNOULLI	BSD68	64	230	0.631864	21.4026
BERNOULLI	BSD68	64	240	0.525311	20.2701
BERNOULLI	BSD68	29	150	0.938119	30.021
BERNOULLI	BSD68	29	160	0.929841	29.444
BERNOULLI	BSD68	29	170	0.918573	28.7685
BERNOULLI	BSD68	29	180	0.90483	27.8815
BERNOULLI	BSD68	29	190	0.889777	27.4729
BERNOULLI	BSD68	29	200	0.866049	26.2749
BERNOULLI	BSD68	29	210	0.838825	25.512
BERNOULLI	BSD68	29	220	0.803261	24.4979
BERNOULLI	BSD68	29	230	0.752975	23.316
BERNOULLI	BSD68	29	240	0.669365	21.6466
BERNOULLI	BSD68	58	150	0.881111	29.0251
BERNOULLI	BSD68	58	160	0.864976	28.4785
BERNOULLI	BSD68	58	170	0.849052	28.0008
BERNOULLI	BSD68	58	180	0.830896	27.5344
BERNOULLI	BSD68	58	190	0.810916	27.1503
BERNOULLI	BSD68	58	200	0.785769	26.4705
BERNOULLI	BSD68	58	210	0.762709	26.062
BERNOULLI	BSD68	58	220	0.724637	25.3559
BERNOULLI	BSD68	58	230	0.686021	24.7874
BERNOULLI	BSD68	58	240	0.639999	24.1498
BERNOULLI	BSD68	56	150	0.884894	27.7138
BERNOULLI	BSD68	56	160	0.864747	26.9368
BERNOULLI	BSD68	56	170	0.850878	26.5191
BERNOULLI	BSD68	56	180	0.827835	25.8711
BERNOULLI	BSD68	56	190	0.800684	25.0621
BERNOULLI	BSD68	56	200	0.770989	24.5301
BERNOULLI	BSD68	56	210	0.732999	23.6233
BERNOULLI	BSD68	56	220	0.686072	22.895
BERNOULLI	BSD68	56	230	0.626016	21.7889
BERNOULLI	BSD68	56	240	0.540474	20.546
BERNOULLI	BSD68	13	150	0.955897	36.1514
BERNOULLI	BSD68	13	160	0.951324	35.5954
BERNOULLI	BSD68	13	170	0.944944	34.9127
BERNOULLI	BSD68	13	180	0.939464	34.6086
BERNOULLI	BSD68	13	190	0.931018	33.8253
BERNOULLI	BSD68	13	200	0.918752	33.1667
BERNOULLI	BSD68	13	210	0.906261	32.3199
BERNOULLI	BSD68	13	220	0.892051	31.4138
BERNOULLI	BSD68	13	230	0.869541	30.3044
BERNOULLI	BSD68	13	240	0.834431	28.2407
BERNOULLI	BSD68	65	150	0.845869	27.8843
BERNOULLI	BSD68	65	160	0.82439	27.2754
BERNOULLI	BSD68	65	170	0.804358	26.792
BERNOULLI	BSD68	65	180	0.77952	26.23
BERNOULLI	BSD68	65	190	0.750138	25.6649
BERNOULLI	BSD68	65	200	0.718903	25.1444
BERNOULLI	BSD68	65	210	0.68315	24.5412
BERNOULLI	BSD68	65	220	0.633584	23.7877
BERNOULLI	BSD68	65	230	0.578081	23.0074
BERNOULLI	BSD68	65	240	0.49371	21.7574
BERNOULLI	BSD68	3	150	0.901468	30.0798
BERNOULLI	BSD68	3	160	0.89246	29.6523
BERNOULLI	BSD68	3	170	0.876172	29.0695
BERNOULLI	BSD68	3	180	0.859409	28.5
BERNOULLI	BSD68	3	190	0.839669	27.9056
BERNOULLI	BSD68	3	200	0.816838	27.2377
BERNOULLI	BSD68	3	210	0.788407	26.4489
BERNOULLI	BSD68	3	220	0.750186	25.5677
BERNOULLI	BSD68	3	230	0.699072	24.68
BERNOULLI	BSD68	3	240	0.625856	23.209
BERNOULLI	BSD68	44	150	0.895722	29.0121
BERNOULLI	BSD68	44	160	0.880342	28.2596
BERNOULLI	BSD68	44	170	0.868357	27.8412
BERNOULLI	BSD68	44	180	0.848961	27.2198
BERNOULLI	BSD68	44	190	0.828557	26.5644
BERNOULLI	BSD68	44	200	0.806257	25.8404
BERNOULLI	BSD68	44	210	0.78335	25.34
BERNOULLI	BSD68	44	220	0.747334	24.3493
BERNOULLI	BSD68	44	230	0.711322	23.6453
BERNOULLI	BSD68	44	240	0.662439	22.4531
BERNOULLI	BSD68	24	150	0.875245	27.3752
BERNOULLI	BSD68	24	160	0.86301	26.9627
BERNOULLI	BSD68	24	170	0.845267	26.3507
BERNOULLI	BSD68	24	180	0.826843	25.9722
BERNOULLI	BSD68	24	190	0.805971	25.2642
BERNOULLI	BSD68	24	200	0.788036	24.9366
BERNOULLI	BSD68	24	210	0.757772	24.1753
BERNOULLI	BSD68	24	220	0.722186	23.3597
BERNOULLI	BSD68	24	230	0.681894	22.6919
BERNOULLI	BSD68	24	240	0.619295	21.2806
BERNOULLI	BSD68	2	150	0.946716	36.0653
BERNOULLI	BSD68	2	160	0.939744	35.666
BERNOULLI	BSD68	2	170	0.93238	35.0162
BERNOULLI	BSD68	2	180	0.924595	34.4679
BERNOULLI	BSD68	2	190	0.91514	33.7091
BERNOULLI	BSD68	2	200	0.903967	33.2729
BERNOULLI	BSD68	2	210	0.890948	32.544
BERNOULLI	BSD68	2	220	0.871101	31.6031
BERNOULLI	BSD68	2	230	0.845231	30.3474
BERNOULLI	BSD68	2	240	0.807133	29.0136
BERNOULLI	BSD68	35	150	0.800531	22.9919
BERNOULLI	BSD68	35	160	0.773254	22.4535
BERNOULLI	BSD68	35	170	0.742852	21.9295
BERNOULLI	BSD68	35	180	0.708075	21.4481
BERNOULLI	BSD68	35	190	0.666909	20.8822
BERNOULLI	BSD68	35	200	0.615614	20.3129
BERNOULLI	BSD68	35	210	0.56164	19.812
BERNOULLI	BSD68	35	220	0.500633	19.2529
BERNOULLI	BSD68	35	230	0.414879	18.6088
BERNOULLI	BSD68	35	240	0.318246	17.9429
BERNOULLI	BSD68	22	150	0.925967	28.1163
BERNOULLI	BSD68	22	160	0.915482	27.4511
BERNOULLI	BSD68	22	170	0.8994	26.6868
BERNOULLI	BSD68	22	180	0.880303	25.8097
BERNOULLI	BSD68	22	190	0.856102	24.8643
BERNOULLI	BSD68	22	200	0.830585	23.9695
BERNOULLI	BSD68	22	210	0.788032	22.8697
BERNOULLI	BSD68	22	220	0.742487	21.9075
BERNOULLI	BSD68	22	230	0.669933	20.5829
BERNOULLI	BSD68	22	240	0.5715	19.0933
BERNOULLI	BSD68	61	150	0.903172	33.1364
BERNOULLI	BSD68	61	160	0.892581	32.7397
BERNOULLI	BSD68	61	170	0.882459	32.2502
BERNOULLI	BSD68	61	180	0.867449	31.7106
BERNOULLI	BSD68	61	190	0.851446	31.1306
BERNOULLI	BSD68	61	200	0.835182	30.6025
BERNOULLI	BSD68	61	210	0.816378	30.1968
BERNOULLI	BSD68	61	220	0.793765	29.6562
BERNOULLI	BSD68	61	230	0.76125	28.721
BERNOULLI	BSD68	61	240	0.721823	27.9555
BERNOULLI	BSD68	20	150	0.923014	31.7291
BERNOULLI	BSD68	20	160	0.913272	31.1203
BERNOULLI	BSD68	20	170	0.902382	30.5023
BERNOULLI	BSD68	20	180	0.892649	30.1584
BERNOULLI	BSD68	20	190	0.874623	28.9741
BERNOULLI	BSD68	20	200	0.857537	28.4641
BERNOULLI	BSD68	20	210	0.837055	27.7682
BERNOULLI	BSD68	20	220	0.80676	26.6996
BERNOULLI	BSD68	20	230	0.773016	25.6904
BERNOULLI	BSD68	20	240	0.724886	24.3191
BERNOULLI	BSD68	10	150	0.916683	28.7189
BERNOULLI	BSD68	10	160	0.906756	28.124
BERNOULLI	BSD68	10	170	0.895933	27.5789
BERNOULLI	BSD68	10	180	0.882547	26.8608
BERNOULLI	BSD68	10	190	0.872169	26.4603
BERNOULLI	BSD68	10	200	0.853119	25.7948
BERNOULLI	BSD68	10	210	0.830571	25.0022
BERNOULLI	BSD68	10	220	0.807328	24.3544
BERNOULLI	BSD68	10	230	0.772158	23.3415
BERNOULLI	BSD68	10	240	0.72355	22.2057
BERNOULLI	BSD68	14	150	0.929555	29.7105
BERNOULLI	BSD68	14	160	0.919461	29.0438
BERNOULLI	BSD68	14	170	0.90449	28.2956
BERNOULLI	BSD68	14	180	0.889353	27.5631
BERNOULLI	BSD68	14	190	0.871483	27.0078
BERNOULLI	BSD68	14	200	0.843134	26.0443
BERNOULLI	BSD68	14	210	0.812249	25.4058
BERNOULLI	BSD68	14	220	0.768777	24.2693
BERNOULLI	BSD68	14	230	0.70221	23.2828
BERNOULLI	BSD68	14	240	0.605449	21.6962
BERNOULLI	BSD68	8	150	0.815783	25.3899
BERNOULLI	BSD68	8	160	0.794937	25.003
BERNOULLI	BSD68	8	170	0.770861	24.4246
BERNOULLI	BSD68	8	180	0.745216	23.9589
BERNOULLI	BSD68	8	190	0.7155	23.4918
BERNOULLI	BSD68	8	200	0.683014	23.0796
BERNOULLI	BSD68	8	210	0.642312	22.4166
BERNOULLI	BSD68	8	220	0.594988	21.9126
BERNOULLI	BSD68	8	230	0.541722	21.2044
BERNOULLI	BSD68	8	240	0.453348	20.2557
BERNOULLI	BSD68	42	150	0.977444	37.4679
BERNOULLI	BSD68	42	160	0.974253	36.777
BERNOULLI	BSD68	42	170	0.968898	35.5125
BERNOULLI	BSD68	42	180	0.964081	34.8594
BERNOULLI	BSD68	42	190	0.956537	34.0801
BERNOULLI	BSD68	42	200	0.947091	32.5539
BERNOULLI	BSD68	42	210	0.931364	31.4406
BERNOULLI	BSD68	42	220	0.90895	29.5414
BERNOULLI	BSD68	42	230	0.876065	27.9768
BERNOULLI	BSD68	42	240	0.806185	25.5059
BERNOULLI	BSD68	38	150	0.94265	37.0217
BERNOULLI	BSD68	38	160	0.936912	36.4351
BERNOULLI	BSD68	38	170	0.929975	35.7373
BERNOULLI	BSD68	38	180	0.923309	35.1726
BERNOULLI	BSD68	38	190	0.914035	34.3295
BERNOULLI	BSD68	38	200	0.902608	33.5402
BERNOULLI	BSD68	38	210	0.892013	32.4904
BERNOULLI	BSD68	38	220	0.875391	31.3851
BERNOULLI	BSD68	38	230	0.85296	30.2552
BERNOULLI	BSD68	38	240	0.816896	27.8658
BERNOULLI	BSD68	25	150	0.897886	27.258
BERNOULLI	BSD68	25	160	0.885367	26.5838
BERNOULLI	BSD68	25	170	0.874547	26.263
BERNOULLI	BSD68	25	180	0.85987	25.6312
BERNOULLI	BSD68	25	190	0.841477	25.1337
BERNOULLI	BSD68	25	200	0.825376	24.4535
BERNOULLI	BSD68	25	210	0.802968	23.9649
BERNOULLI	BSD68	25	220	0.781219	23.2125
BERNOULLI	BSD68	25	230	0.750931	22.4349
BERNOULLI	BSD68	25	240	0.704305	21.0866
BERNOULLI	BSD68	16	150	0.922978	29.9328
BERNOULLI	BSD68	16	160	0.913765	29.4219
BERNOULLI	BSD68	16	170	0.898861	28.6982
BERNOULLI	BSD68	16	180	0.88579	28.1207
BERNOULLI	BSD68	16	190	0.867345	27.4115
BERNOULLI	BSD68	16	200	0.847696	26.737
BERNOULLI	BSD68	16	210	0.820996	25.9454
BERNOULLI	BSD68	16	220	0.788133	25.0478
BERNOULLI	BSD68	16	230	0.741123	24.0148
BERNOULLI	BSD68	16	240	0.669677	22.7056
BERNOULLI	BSD68	23	150	0.957755	35.3942
BERNOULLI	BSD68	23	160	0.951943	34.6625
BERNOULLI	BSD68	23	170	0.945694	34.2268
BERNOULLI	BSD68	23	180	0.939528	33.6699
BERNOULLI	BSD68	23	190	0.930207	33.0256
BERNOULLI	BSD68	23	200	0.919202	32.1656
BERNOULLI	BSD68	23	210	0.906261	31.6041
BERNOULLI	BSD68	23	220	0.886619	30.51
BERNOULLI	BSD68	23	230	0.863154	29.6489
BERNOULLI	BSD68	23	240	0.822969	28.1149
BERNOULLI	BSD68	15	150	0.857326	24.9082
BERNOULLI	BSD68	15	160	0.831858	24.2828
BERNOULLI	BSD68	15	170	0.810971	23.8081
BERNOULLI	BSD68	15	180	0.783544	23.2481
BERNOULLI	BSD68	15	190	0.752897	22.771
BERNOULLI	BSD68	15	200	0.710622	22.1209
BERNOULLI	BSD68	15	210	0.665408	21.5757
BERNOULLI	BSD68	15	220	0.611476	20.9604
BERNOULLI	BSD68	15	230	0.54551	20.3583
BERNOULLI	BSD68	15	240	0.455809	19.4302
BERNOULLI	BSD68	52	150	0.895345	26.5762
BERNOULLI	BSD68	52	160	0.881935	25.9802
BERNOULLI	BSD68	52	170	0.866367	25.3857
BERNOULLI	BSD68	52	180	0.846035	24.4005
BERNOULLI	BSD68	52	190	0.826502	23.9238
BERNOULLI	BSD68	52	200	0.794442	22.8571
BERNOULLI	BSD68	52	210	0.766726	22.0469
BERNOULLI	BSD68	52	220	0.722789	21.2015
BERNOULLI	BSD68	52	230	0.671123	19.9152
BERNOULLI	BSD68	52	240	0.59187	18.6233
BERNOULLI	BSD68	28	150	0.930074	28.5083
BERNOULLI	BSD68	28	160	0.920047	27.9958
BERNOULLI	BSD68	28	170	0.906967	27.2549
BERNOULLI	BSD68	28	180	0.894381	26.7471
BERNOULLI	BSD68	28	190	0.875902	26.1971
BERNOULLI	BSD68	28	200	0.852122	25.5741
BERNOULLI	BSD68	28	210	0.825708	24.862
BERNOULLI	BSD68	28	220	0.783291	23.8736
BERNOULLI	BSD68	28	230	0.733728	23.0739
BERNOULLI	BSD68	28	240	0.660697	22.0452
BERNOULLI	BSD68	37	150	0.911409	26.5994
BERNOULLI	BSD68	37	160	0.902354	26.0996
BERNOULLI	BSD68	37	170	0.887672	25.563
BERNOULLI	BSD68	37	180	0.873839	25.0504
BERNOULLI	BSD68	37	190	0.857462	24.4789
BERNOULLI	BSD68	37	200	0.839289	23.9998
BERNOULLI	BSD68	37	210	0.817527	23.509
BERNOULLI	BSD68	37	220	0.785994	22.7609
BERNOULLI	BSD68	37	230	0.744641	21.8818
BERNOULLI	BSD68	37	240	0.67497	20.5002
BERNOULLI	BSD68	67	150	0.856201	24.2038
BERNOULLI	BSD68	67	160	0.838585	23.6677
BERNOULLI	BSD68	67	170	0.820314	23.2225
BERNOULLI	BSD68	67	180	0.794715	22.6853
BERNOULLI	BSD68	67	190	0.769432	22.1848
BERNOULLI	BSD68	67	200	0.743349	21.713
BERNOULLI	BSD68	67	210	0.709227	21.1867
BERNOULLI	BSD68	67	220	0.664336	20.4557
BERNOULLI	BSD68	67	230	0.619497	19.9225
BERNOULLI	BSD68	67	240	0.559885	18.9588
BERNOULLI	BSD68	40	150	0.873893	29.5326
BERNOULLI	BSD68	40	160	0.860862	29.1102
BERNOULLI	BSD68	40	170	0.84397	28.6544
BERNOULLI	BSD68	40	180	0.825001	28.1355
BERNOULLI	BSD68	40	190	0.804362	27.7838
BERNOULLI	BSD68	40	200	0.780208	26.9775
BERNOULLI	BSD68	40	210	0.749119	26.3004
BERNOULLI	BSD68	40	220	0.719378	25.8273
BERNOULLI	BSD68	40	230	0.682017	25.0663
BERNOULLI	BSD68	40	240	0.622858	23.9539
BERNOULLI	BSD68	19	150	0.94139	32.9381
BERNOULLI	BSD68	19	160	0.933388	32.3767
BERNOULLI	BSD68	19	170	0.923273	31.7877
BERNOULLI	BSD68	19	180	0.909333	30.9617
BERNOULLI	BSD68	19	190	0.895945	30.5108
BERNOULLI	BSD68	19	200	0.874365	29.6585
BERNOULLI	BSD68	19	210	0.849746	28.8938
BERNOULLI	BSD68	19	220	0.810262	27.8691
BERNOULLI	BSD68	19	230	0.762674	26.8868
BERNOULLI	BSD68	19	240	0.686313	25.5631
BERNOULLI	BSD68	33	150	0.801078	21.3517
BERNOULLI	BSD68	33	160	0.777979	20.8383
BERNOULLI	BSD68	33	170	0.747195	20.2656
BERNOULLI	BSD68	33	180	0.716373	19.824
BERNOULLI	BSD68	33	190	0.689461	19.4319
BERNOULLI	BSD68	33	200	0.648196	18.9832
BERNOULLI	BSD68	33	210	0.607078	18.4896
BERNOULLI	BSD68	33	220	0.547348	17.8303
BERNOULLI	BSD68	33	230	0.494063	17.3037
BERNOULLI	BSD68	33	240	0.415663	16.5659
BERNOULLI	BSD68	6	150	0.954156	29.6287
BERNOULLI	BSD68	6	160	0.947507	28.8079
BERNOULLI	BSD68	6	170	0.941883	28.4769
BERNOULLI	BSD68	6	180	0.930749	27.5256
BERNOULLI	BSD68	6	190	0.914816	26.5481
BERNOULLI	BSD68	6	200	0.897653	25.4246
BERNOULLI	BSD68	6	210	0.878421	24.7023
BERNOULLI	BSD68	6	220	0.848287	23.6188
BERNOULLI	BSD68	6	230	0.796292	21.9063
BERNOULLI	BSD68	6	240	0.728733	20.4534
BERNOULLI	BSD68	62	150	0.893889	30.5951
BERNOULLI	BSD68	62	160	0.881983	30.0592
BERNOULLI	BSD68	62	170	0.869163	29.5731
BERNOULLI	BSD68	62	180	0.853344	29.0158
BERNOULLI	BSD68	62	190	0.835794	28.4903
BERNOULLI	BSD68	62	200	0.817922	27.9395
BERNOULLI	BSD68	62	210	0.791929	27.2602
BERNOULLI	BSD68	62	220	0.763253	26.4481
BERNOULLI	BSD68	62	230	0.732377	25.6276
BERNOULLI	BSD68	62	240	0.684584	24.5925
BERNOULLI	BSD68	55	150	0.924528	30.8476
BERNOULLI	BSD68	55	160	0.913029	30.0173
BERNOULLI	BSD68	55	170	0.898981	29.2945
BERNOULLI	BSD68	55	180	0.882607	28.6611
BERNOULLI	BSD68	55	190	0.863142	27.9673
BERNOULLI	BSD68	55	200	0.839984	27.1194
BERNOULLI	BSD68	55	210	0.807578	26.2179
BERNOULLI	BSD68	55	220	0.773183	25.39
BERNOULLI	BSD68	55	230	0.717743	24.2247
BERNOULLI	BSD68	55	240	0.62998	22.5733
BERNOULLI	BSD68	1	150	0.913553	30.8267
BERNOULLI	BSD68	1	160	0.898969	30.1511
BERNOULLI	BSD68	1	170	0.88134	29.4902
BERNOULLI	BSD68	1	180	0.865089	28.7522
BERNOULLI	BSD68	1	190	0.841155	28.0114
BERNOULLI	BSD68	1	200	0.809326	27.2181
BERNOULLI	BSD68	1	210	0.773269	26.2798
BERNOULLI	BSD68	1	220	0.727247	25.3056
BERNOULLI	BSD68	1	230	0.659568	24.2421
BERNOULLI	BSD68	1	240	0.557843	22.8089
BERNOULLI	BSD68	46	150	0.873187	26.3566
BERNOULLI	BSD68	46	160	0.856213	25.8402
BERNOULLI	BSD68	46	170	0.83701	25.2622
BERNOULLI	BSD68	46	180	0.81672	24.7857
BERNOULLI	BSD68	46	190	0.789577	24.274
BERNOULLI	BSD68	46	200	0.760754	23.7267
BERNOULLI	BSD68	46	210	0.719518	23.0641
BERNOULLI	BSD68	46	220	0.678588	22.4739
BERNOULLI	BSD68	46	230	0.620865	21.8569
BERNOULLI	BSD68	46	240	0.546891	21.0399
BERNOULLI	BSD68	51	150	0.863018	27.1847
BERNOULLI	BSD68	51	160	0.844037	26.7115
BERNOULLI	BSD68	51	170	0.823541	26.1387
BERNOULLI	BSD68	51	180	0.801234	25.6167
BERNOULLI	BSD68	51	190	0.776348	25.1014
BERNOULLI	BSD68	51	200	0.746142	24.5996
BERNOULLI	BSD68	51	210	0.710764	24.0128
BERNOULLI	BSD68	51	220	0.664066	23.2937
BERNOULLI	BSD68	51	230	0.615328	22.6863
BERNOULLI	BSD68	51	240	0.5325	21.5245
BERNOULLI	BSD68	32	150	0.931227	33.6481
BERNOULLI	BSD68	32	160	0.92383	32.7058
BERNOULLI	BSD68	32	170	0.916871	32.2966
BERNOULLI	BSD68	32	180	0.906575	31.4371
BERNOULLI	BSD68	32	190	0.897013	31.0245
BERNOULLI	BSD68	32	200	0.886231	30.4871
BERNOULLI	BSD68	32	210	0.873268	29.4482
BERNOULLI	BSD68	32	220	0.856908	28.6115
BERNOULLI	BSD68	32	230	0.83404	27.2005
BERNOULLI	BSD68	32	240	0.807443	26.1084
BERNOULLI	BSD68	34	150	0.940798	32.6244
BERNOULLI	BSD68	34	160	0.931669	31.8513
BERNOULLI	BSD68	34	170	0.919038	31.094
BERNOULLI	BSD68	34	180	0.908596	30.7584
BERNOULLI	BSD68	34	190	0.894124	30.0312
BERNOULLI	BSD68	34	200	0.873317	29.2484
BERNOULLI	BSD68	34	210	0.846414	28.3549
BERNOULLI	BSD68	34	220	0.81077	27.5341
BERNOULLI	BSD68	34	230	0.758097	26.484
BERNOULLI	BSD68	34	240	0.680123	25.0928
BERNOULLI	BSD68	54	150	0.901974	34.1991
BERNOULLI	BSD68	54	160	0.891987	33.6823
BERNOULLI	BSD68	54	170	0.879049	33.1876
BERNOULLI	BSD68	54	180	0.863976	32.7534
BERNOULLI	BSD68	54	190	0.847522	32.2267
BERNOULLI	BSD68	54	200	0.82936	31.7097
BERNOULLI	BSD68	54	210	0.804966	30.9712
BERNOULLI	BSD68	54	220	0.782898	30.6462
BERNOULLI	BSD68	54	230	0.749984	29.8292
BERNOULLI	BSD68	54	240	0.701453	28.958
BERNOULLI	Set12	3	150	0.937848	24.9722
BERNOULLI	Set12	3	160	0.933554	24.8931
BERNOULLI	Set12	3	170	0.926226	24.7992
BERNOULLI	Set12	3	180	0.919259	24.6345
BERNOULLI	Set12	3	190	0.909949	24.4814
BERNOULLI	Set12	3	200	0.892188	24.0429
BERNOULLI	Set12	3	210	0.879585	23.7367
BERNOULLI	Set12	3	220	0.854716	23.3528
BERNOULLI	Set12	3	230	0.824216	22.8786
BERNOULLI	Set12	3	240	0.763293	21.5165
BERNOULLI	Set12	9	150	0.890989	27.3778
BERNOULLI	Set12	9	160	0.877605	26.8546
BERNOULLI	Set12	9	170	0.861571	26.2898
BERNOULLI	Set12	9	180	0.843153	25.7821
BERNOULLI	Set12	9	190	0.822346	25.2762
BERNOULLI	Set12	9	200	0.7981	24.6803
BERNOULLI	Set12	9	210	0.769976	24.1312
BERNOULLI	Set12	9	220	0.736986	23.5695
BERNOULLI	Set12	9	230	0.699834	23.0284
BERNOULLI	Set12	9	240	0.64516	22.1964
BERNOULLI	Set12	5	150	0.960634	31.0042
BERNOULLI	Set12	5	160	0.955365	30.1564
BERNOULLI	Set12	5	170	0.947818	29.4699
BERNOULLI	Set12	5	180	0.941521	28.6969
BERNOULLI	Set12	5	190	0.93017	27.7579
BERNOULLI	Set12	5	200	0.913793	26.5142
BERNOULLI	Set12	5	210	0.895558	25.6265
BERNOULLI	Set12	5	220	0.863444	23.7672
BERNOULLI	Set12	5	230	0.821395	22.6792
BERNOULLI	Set12	5	240	0.747232	20.7074
BERNOULLI	Set12	10	150	0.900868	32.0295
BERNOULLI	Set12	10	160	0.892003	31.3592
BERNOULLI	Set12	10	170	0.879508	30.7504
BERNOULLI	Set12	10	180	0.868584	30.2794
BERNOULLI	Set12	10	190	0.851693	29.4833
BERNOULLI	Set12	10	200	0.83346	28.7127
BERNOULLI	Set12	10	210	0.807054	27.6503
BERNOULLI	Set12	10	220	0.772989	26.6657
BERNOULLI	Set12	10	230	0.729343	25.5259
BERNOULLI	Set12	10	240	0.660991	23.9746
BERNOULLI	Set12	2	150	0.930842	35.999
BERNOULLI	Set12	2	160	0.924023	35.0881
BERNOULLI	Set12	2	170	0.918193	34.4656
BERNOULLI	Set12	2	180	0.907044	33.7348
BERNOULLI	Set12	2	190	0.896002	33.0469
BERNOULLI	Set12	2	200	0.886219	32.1527
BERNOULLI	Set12	2	210	0.871265	31.0527
BERNOULLI	Set12	2	220	0.849736	29.4331
BERNOULLI	Set12	2	230	0.822035	27.9802
BERNOULLI	Set12	2	240	0.762111	25.172
BERNOULLI	Set12	8	150	0.939649	35.4355
BERNOULLI	Set12	8	160	0.934444	34.9091
BERNOULLI	Set12	8	170	0.927234	34.3079
BERNOULLI	Set12	8	180	0.919893	33.7381
BERNOULLI	Set12	8	190	0.91008	32.9641
BERNOULLI	Set12	8	200	0.898606	32.0543
BERNOULLI	Set12	8	210	0.883656	31.2458
BERNOULLI	Set12	8	220	0.862006	29.984
BERNOULLI	Set12	8	230	0.832505	28.4304
BERNOULLI	Set12	8	240	0.787655	26.737
BERNOULLI	Set12	12	150	0.923297	32.073
BERNOULLI	Set12	12	160	0.913625	31.4748
BERNOULLI	Set12	12	170	0.903186	30.8225
BERNOULLI	Set12	12	180	0.888038	30.1104
BERNOULLI	Set12	12	190	0.869882	29.2033
BERNOULLI	Set12	12	200	0.849318	28.5282
BERNOULLI	Set12	12	210	0.821943	27.6434
BERNOULLI	Set12	12	220	0.784559	26.5843
BERNOULLI	Set12	12	230	0.729896	25.3587
BERNOULLI	Set12	12	240	0.644401	23.9248
BERNOULLI	Set12	6	150	0.917548	28.3004
BERNOULLI	Set12	6	160	0.907784	27.4789
BERNOULLI	Set12	6	170	0.896859	26.8415
BERNOULLI	Set12	6	180	0.88684	26.5077
BERNOULLI	Set12	6	190	0.87449	25.7769
BERNOULLI	Set12	6	200	0.855242	24.9556
BERNOULLI	Set12	6	210	0.824797	23.9842
BERNOULLI	Set12	6	220	0.804169	23.2468
BERNOULLI	Set12	6	230	0.757083	22.1711
BERNOULLI	Set12	6	240	0.69432	20.8022
BERNOULLI	Set12	7	150	0.930502	28.7258
BERNOULLI	Set12	7	160	0.923097	28.0412
BERNOULLI	Set12	7	170	0.913277	27.2904
BERNOULLI	Set12	7	180	0.902682	26.4878
BERNOULLI	Set12	7	190	0.887347	25.77
BERNOULLI	Set12	7	200	0.874166	24.8796
BERNOULLI	Set12	7	210	0.857165	24.3914
BERNOULLI	Set12	7	220	0.831628	23.2039
BERNOULLI	Set12	7	230	0.791513	21.3526
BERNOULLI	Set12	7	240	0.732021	20.2475
BERNOULLI	Set12	4	150	0.941005	30.6635
BERNOULLI	Set12	4	160	0.933389	30.044
BERNOULLI	Set12	4	170	0.921482	29.0553
BERNOULLI	Set12	4	180	0.90926	28.0852
BERNOULLI	Set12	4	190	0.888718	27.3373
BERNOULLI	Set12	4	200	0.875725	26.7883
BERNOULLI	Set12	4	210	0.840792	25.3896
BERNOULLI	Set12	4	220	0.803144	24.275
BERNOULLI	Set12	4	230	0.751626	23.0242
BERNOULLI	Set12	4	240	0.659098	21.3982
BERNOULLI	Set12	11	150	0.926302	32.4904
BERNOULLI	Set12	11	160	0.916324	31.8906
BERNOULLI	Set12	11	170	0.904428	31.2963
BERNOULLI	Set12	11	180	0.89275	30.6814
BERNOULLI	Set12	11	190	0.876779	29.9995
BERNOULLI	Set12	11	200	0.856372	29.2649
BERNOULLI	Set12	11	210	0.834161	28.5653
BERNOULLI	Set12	11	220	0.80164	27.6253
BERNOULLI	Set12	11	230	0.760359	26.4093
BERNOULLI	Set12	11	240	0.689244	24.9249
BERNOULLI	Set12	1	150	0.914585	28.4088
BERNOULLI	Set12	1	160	0.901784	27.7895
BERNOULLI	Set12	1	170	0.891403	26.939
BERNOULLI	Set12	1	180	0.881464	26.5616
BERNOULLI	Set12	1	190	0.866286	25.9825
BERNOULLI	Set12	1	200	0.847707	24.915
BERNOULLI	Set12	1	210	0.825406	24.2351
BERNOULLI	Set12	1	220	0.801513	23.5157
BERNOULLI	Set12	1	230	0.759002	22.3363
BERNOULLI	Set12	1	240	0.706084	20.8387
BERNOULLI	Urban100	img_084_SRF_2_HR	150	0.925498	30.0365
BERNOULLI	Urban100	img_084_SRF_2_HR	160	0.915321	29.4016
BERNOULLI	Urban100	img_084_SRF_2_HR	170	0.90217	28.707
BERNOULLI	Urban100	img_084_SRF_2_HR	180	0.883569	27.8792
BERNOULLI	Urban100	img_084_SRF_2_HR	190	0.863092	27.1906
BERNOULLI	Urban100	img_084_SRF_2_HR	200	0.839766	26.4207
BERNOULLI	Urban100	img_084_SRF_2_HR	210	0.80536	25.5056
BERNOULLI	Urban100	img_084_SRF_2_HR	220	0.757704	24.5238
BERNOULLI	Urban100	img_084_SRF_2_HR	230	0.692846	23.2104
BERNOULLI	Urban100	img_084_SRF_2_HR	240	0.59165	21.6633
BERNOULLI	Urban100	img_011_SRF_2_HR	150	0.915178	22.2883
BERNOULLI	Urban100	img_011_SRF_2_HR	160	0.905072	21.6036
BERNOULLI	Urban100	img_011_SRF_2_HR	170	0.891448	20.8369
BERNOULLI	Urban100	img_011_SRF_2_HR	180	0.874218	20.0482
BERNOULLI	Urban100	img_011_SRF_2_HR	190	0.858506	19.476
BERNOULLI	Urban100	img_011_SRF_2_HR	200	0.831141	18.46
BERNOULLI	Urban100	img_011_SRF_2_HR	210	0.791354	17.2788
BERNOULLI	Urban100	img_011_SRF_2_HR	220	0.740981	16.0506
BERNOULLI	Urban100	img_011_SRF_2_HR	230	0.662223	14.622
BERNOULLI	Urban100	img_011_SRF_2_HR	240	0.540455	12.8289
BERNOULLI	Urban100	img_006_SRF_2_HR	150	0.847709	24.2154
BERNOULLI	Urban100	img_006_SRF_2_HR	160	0.829124	23.7582
BERNOULLI	Urban100	img_006_SRF_2_HR	170	0.808709	23.1846
BERNOULLI	Urban100	img_006_SRF_2_HR	180	0.784101	22.4866
BERNOULLI	Urban100	img_006_SRF_2_HR	190	0.753595	21.8668
BERNOULLI	Urban100	img_006_SRF_2_HR	200	0.719686	21.2853
BERNOULLI	Urban100	img_006_SRF_2_HR	210	0.674756	20.5919
BERNOULLI	Urban100	img_006_SRF_2_HR	220	0.629732	20.0009
BERNOULLI	Urban100	img_006_SRF_2_HR	230	0.556429	19.0402
BERNOULLI	Urban100	img_006_SRF_2_HR	240	0.459988	18.1298
BERNOULLI	Urban100	img_003_SRF_2_HR	150	0.884656	26.9596
BERNOULLI	Urban100	img_003_SRF_2_HR	160	0.868109	26.2429
BERNOULLI	Urban100	img_003_SRF_2_HR	170	0.850334	25.6317
BERNOULLI	Urban100	img_003_SRF_2_HR	180	0.830466	25.0886
BERNOULLI	Urban100	img_003_SRF_2_HR	190	0.804492	24.4577
BERNOULLI	Urban100	img_003_SRF_2_HR	200	0.774637	23.7389
BERNOULLI	Urban100	img_003_SRF_2_HR	210	0.735984	23.0136
BERNOULLI	Urban100	img_003_SRF_2_HR	220	0.682881	22.0009
BERNOULLI	Urban100	img_003_SRF_2_HR	230	0.622254	21.1578
BERNOULLI	Urban100	img_003_SRF_2_HR	240	0.520632	19.7371
BERNOULLI	Urban100	img_073_SRF_2_HR	150	0.84674	23.6035
BERNOULLI	Urban100	img_073_SRF_2_HR	160	0.825418	23.0598
BERNOULLI	Urban100	img_073_SRF_2_HR	170	0.800213	22.4632
BERNOULLI	Urban100	img_073_SRF_2_HR	180	0.77143	21.9179
BERNOULLI	Urban100	img_073_SRF_2_HR	190	0.73857	21.3751
BERNOULLI	Urban100	img_073_SRF_2_HR	200	0.693573	20.6512
BERNOULLI	Urban100	img_073_SRF_2_HR	210	0.640365	19.9587
BERNOULLI	Urban100	img_073_SRF_2_HR	220	0.572379	19.0935
BERNOULLI	Urban100	img_073_SRF_2_HR	230	0.488613	18.2442
BERNOULLI	Urban100	img_073_SRF_2_HR	240	0.379527	17.3589
BERNOULLI	Urban100	img_057_SRF_2_HR	150	0.931778	29.6099
BERNOULLI	Urban100	img_057_SRF_2_HR	160	0.918713	28.5671
BERNOULLI	Urban100	img_057_SRF_2_HR	170	0.907889	28.191
BERNOULLI	Urban100	img_057_SRF_2_HR	180	0.896857	27.5049
BERNOULLI	Urban100	img_057_SRF_2_HR	190	0.876331	26.2418
BERNOULLI	Urban100	img_057_SRF_2_HR	200	0.855461	25.4276
BERNOULLI	Urban100	img_057_SRF_2_HR	210	0.828612	24.282
BERNOULLI	Urban100	img_057_SRF_2_HR	220	0.7881	23.302
BERNOULLI	Urban100	img_057_SRF_2_HR	230	0.735555	21.8126
BERNOULLI	Urban100	img_057_SRF_2_HR	240	0.652058	19.8652
BERNOULLI	Urban100	img_016_SRF_2_HR	150	0.647405	11.1589
BERNOULLI	Urban100	img_016_SRF_2_HR	160	0.642893	11.1533
BERNOULLI	Urban100	img_016_SRF_2_HR	170	0.63972	11.162
BERNOULLI	Urban100	img_016_SRF_2_HR	180	0.633644	11.1417
BERNOULLI	Urban100	img_016_SRF_2_HR	190	0.623641	11.1254
BERNOULLI	Urban100	img_016_SRF_2_HR	200	0.615931	11.1223
BERNOULLI	Urban100	img_016_SRF_2_HR	210	0.602573	11.0949
BERNOULLI	Urban100	img_016_SRF_2_HR	220	0.576657	11.0228
BERNOULLI	Urban100	img_016_SRF_2_HR	230	0.545482	10.9054
BERNOULLI	Urban100	img_016_SRF_2_HR	240	0.486547	10.7002
BERNOULLI	Urban100	img_002_SRF_2_HR	150	0.927229	28.0418
BERNOULLI	Urban100	img_002_SRF_2_HR	160	0.915531	27.3672
BERNOULLI	Urban100	img_002_SRF_2_HR	170	0.903813	26.8285
BERNOULLI	Urban100	img_002_SRF_2_HR	180	0.889408	26.1586
BERNOULLI	Urban100	img_002_SRF_2_HR	190	0.871266	25.4525
BERNOULLI	Urban100	img_002_SRF_2_HR	200	0.847186	24.7725
BERNOULLI	Urban100	img_002_SRF_2_HR	210	0.818953	24.0166
BERNOULLI	Urban100	img_002_SRF_2_HR	220	0.772544	22.9391
BERNOULLI	Urban100	img_002_SRF_2_HR	230	0.704264	21.6821
BERNOULLI	Urban100	img_002_SRF_2_HR	240	0.600962	20.0628
BERNOULLI	Urban100	img_044_SRF_2_HR	150	0.925694	30.0511
BERNOULLI	Urban100	img_044_SRF_2_HR	160	0.913252	29.4306
BERNOULLI	Urban100	img_044_SRF_2_HR	170	0.896152	28.5621
BERNOULLI	Urban100	img_044_SRF_2_HR	180	0.877819	27.8298
BERNOULLI	Urban100	img_044_SRF_2_HR	190	0.85029	26.7787
BERNOULLI	Urban100	img_044_SRF_2_HR	200	0.815814	25.8235
BERNOULLI	Urban100	img_044_SRF_2_HR	210	0.767867	24.6544
BERNOULLI	Urban100	img_044_SRF_2_HR	220	0.707483	23.5837
BERNOULLI	Urban100	img_044_SRF_2_HR	230	0.620156	22.2338
BERNOULLI	Urban100	img_044_SRF_2_HR	240	0.50451	20.9514
BERNOULLI	Urban100	img_060_SRF_2_HR	150	0.873169	26.4076
BERNOULLI	Urban100	img_060_SRF_2_HR	160	0.8553	25.8626
BERNOULLI	Urban100	img_060_SRF_2_HR	170	0.836433	25.2606
BERNOULLI	Urban100	img_060_SRF_2_HR	180	0.81358	24.6795
BERNOULLI	Urban100	img_060_SRF_2_HR	190	0.787052	24.0716
BERNOULLI	Urban100	img_060_SRF_2_HR	200	0.75695	23.4377
BERNOULLI	Urban100	img_060_SRF_2_HR	210	0.713549	22.6559
BERNOULLI	Urban100	img_060_SRF_2_HR	220	0.665634	21.7649
BERNOULLI	Urban100	img_060_SRF_2_HR	230	0.597637	20.8902
BERNOULLI	Urban100	img_060_SRF_2_HR	240	0.499119	19.6545
BERNOULLI	Urban100	img_075_SRF_2_HR	150	0.95223	32.4946
BERNOULLI	Urban100	img_075_SRF_2_HR	160	0.945363	31.8143
BERNOULLI	Urban100	img_075_SRF_2_HR	170	0.939879	31.1662
BERNOULLI	Urban100	img_075_SRF_2_HR	180	0.92959	30.1515
BERNOULLI	Urban100	img_075_SRF_2_HR	190	0.921152	29.6459
BERNOULLI	Urban100	img_075_SRF_2_HR	200	0.906159	28.4365
BERNOULLI	Urban100	img_075_SRF_2_HR	210	0.888219	27.4148
BERNOULLI	Urban100	img_075_SRF_2_HR	220	0.86646	26.3398
BERNOULLI	Urban100	img_075_SRF_2_HR	230	0.833858	24.8489
BERNOULLI	Urban100	img_075_SRF_2_HR	240	0.779589	23.1339
BERNOULLI	Urban100	img_029_SRF_2_HR	150	0.911694	27.6543
BERNOULLI	Urban100	img_029_SRF_2_HR	160	0.898705	27.1115
BERNOULLI	Urban100	img_029_SRF_2_HR	170	0.883583	26.3567
BERNOULLI	Urban100	img_029_SRF_2_HR	180	0.862305	25.6292
BERNOULLI	Urban100	img_029_SRF_2_HR	190	0.839278	24.783
BERNOULLI	Urban100	img_029_SRF_2_HR	200	0.806787	23.9697
BERNOULLI	Urban100	img_029_SRF_2_HR	210	0.77311	23.2058
BERNOULLI	Urban100	img_029_SRF_2_HR	220	0.725486	22.2197
BERNOULLI	Urban100	img_029_SRF_2_HR	230	0.66516	21.1572
BERNOULLI	Urban100	img_029_SRF_2_HR	240	0.575747	19.6602
BERNOULLI	Urban100	img_012_SRF_2_HR	150	0.892738	26.8848
BERNOULLI	Urban100	img_012_SRF_2_HR	160	0.879201	26.2956
BERNOULLI	Urban100	img_012_SRF_2_HR	170	0.86298	25.8084
BERNOULLI	Urban100	img_012_SRF_2_HR	180	0.843021	25.2433
BERNOULLI	Urban100	img_012_SRF_2_HR	190	0.817824	24.4588
BERNOULLI	Urban100	img_012_SRF_2_HR	200	0.791648	23.8751
BERNOULLI	Urban100	img_012_SRF_2_HR	210	0.756701	23.1865
BERNOULLI	Urban100	img_012_SRF_2_HR	220	0.708136	22.2767
BERNOULLI	Urban100	img_012_SRF_2_HR	230	0.648261	21.4177
BERNOULLI	Urban100	img_012_SRF_2_HR	240	0.564193	20.1955
BERNOULLI	Urban100	img_069_SRF_2_HR	150	0.905683	27.3208
BERNOULLI	Urban100	img_069_SRF_2_HR	160	0.890519	26.7219
BERNOULLI	Urban100	img_069_SRF_2_HR	170	0.876965	26.0775
BERNOULLI	Urban100	img_069_SRF_2_HR	180	0.856222	25.5892
BERNOULLI	Urban100	img_069_SRF_2_HR	190	0.832892	24.8601
BERNOULLI	Urban100	img_069_SRF_2_HR	200	0.805567	24.176
BERNOULLI	Urban100	img_069_SRF_2_HR	210	0.763085	23.2853
BERNOULLI	Urban100	img_069_SRF_2_HR	220	0.7213	22.568
BERNOULLI	Urban100	img_069_SRF_2_HR	230	0.653669	21.515
BERNOULLI	Urban100	img_069_SRF_2_HR	240	0.559006	20.2652
BERNOULLI	Urban100	img_018_SRF_2_HR	150	0.880329	28.1837
BERNOULLI	Urban100	img_018_SRF_2_HR	160	0.8647	27.5735
BERNOULLI	Urban100	img_018_SRF_2_HR	170	0.848089	27.205
BERNOULLI	Urban100	img_018_SRF_2_HR	180	0.825728	26.4307
BERNOULLI	Urban100	img_018_SRF_2_HR	190	0.798502	25.7809
BERNOULLI	Urban100	img_018_SRF_2_HR	200	0.766109	25.1016
BERNOULLI	Urban100	img_018_SRF_2_HR	210	0.727985	24.4257
BERNOULLI	Urban100	img_018_SRF_2_HR	220	0.681679	23.3953
BERNOULLI	Urban100	img_018_SRF_2_HR	230	0.616199	22.4571
BERNOULLI	Urban100	img_018_SRF_2_HR	240	0.510551	20.7152
BERNOULLI	Urban100	img_093_SRF_2_HR	150	0.945062	27.0996
BERNOULLI	Urban100	img_093_SRF_2_HR	160	0.938577	26.573
BERNOULLI	Urban100	img_093_SRF_2_HR	170	0.929145	25.7762
BERNOULLI	Urban100	img_093_SRF_2_HR	180	0.915707	24.8606
BERNOULLI	Urban100	img_093_SRF_2_HR	190	0.904107	24.2141
BERNOULLI	Urban100	img_093_SRF_2_HR	200	0.87744	22.8623
BERNOULLI	Urban100	img_093_SRF_2_HR	210	0.847966	21.7241
BERNOULLI	Urban100	img_093_SRF_2_HR	220	0.80091	20.2429
BERNOULLI	Urban100	img_093_SRF_2_HR	230	0.731357	18.6517
BERNOULLI	Urban100	img_093_SRF_2_HR	240	0.610532	16.6042
BERNOULLI	Urban100	img_072_SRF_2_HR	150	0.919278	20.7932
BERNOULLI	Urban100	img_072_SRF_2_HR	160	0.90701	20.1106
BERNOULLI	Urban100	img_072_SRF_2_HR	170	0.887767	19.2626
BERNOULLI	Urban100	img_072_SRF_2_HR	180	0.866917	18.5578
BERNOULLI	Urban100	img_072_SRF_2_HR	190	0.837371	17.5975
BERNOULLI	Urban100	img_072_SRF_2_HR	200	0.80249	16.8072
BERNOULLI	Urban100	img_072_SRF_2_HR	210	0.753703	15.8295
BERNOULLI	Urban100	img_072_SRF_2_HR	220	0.691892	14.8455
BERNOULLI	Urban100	img_072_SRF_2_HR	230	0.589515	13.6172
BERNOULLI	Urban100	img_072_SRF_2_HR	240	0.456192	12.1799
BERNOULLI	Urban100	img_010_SRF_2_HR	150	0.930881	29.1985
BERNOULLI	Urban100	img_010_SRF_2_HR	160	0.921713	28.5983
BERNOULLI	Urban100	img_010_SRF_2_HR	170	0.911885	28.0003
BERNOULLI	Urban100	img_010_SRF_2_HR	180	0.899871	27.1267
BERNOULLI	Urban100	img_010_SRF_2_HR	190	0.884821	26.5454
BERNOULLI	Urban100	img_010_SRF_2_HR	200	0.867595	25.6676
BERNOULLI	Urban100	img_010_SRF_2_HR	210	0.839139	24.6085
BERNOULLI	Urban100	img_010_SRF_2_HR	220	0.814522	23.9489
BERNOULLI	Urban100	img_010_SRF_2_HR	230	0.764459	22.5268
BERNOULLI	Urban100	img_010_SRF_2_HR	240	0.703199	21.1273
BERNOULLI	Urban100	img_058_SRF_2_HR	150	0.897538	21.0126
BERNOULLI	Urban100	img_058_SRF_2_HR	160	0.889845	20.9407
BERNOULLI	Urban100	img_058_SRF_2_HR	170	0.876196	20.8258
BERNOULLI	Urban100	img_058_SRF_2_HR	180	0.863704	20.5945
BERNOULLI	Urban100	img_058_SRF_2_HR	190	0.842816	20.0934
BERNOULLI	Urban100	img_058_SRF_2_HR	200	0.822774	19.8324
BERNOULLI	Urban100	img_058_SRF_2_HR	210	0.787395	19.0868
BERNOULLI	Urban100	img_058_SRF_2_HR	220	0.732759	18.189
BERNOULLI	Urban100	img_058_SRF_2_HR	230	0.661729	16.8495
BERNOULLI	Urban100	img_058_SRF_2_HR	240	0.530256	15.142
BERNOULLI	Urban100	img_007_SRF_2_HR	150	0.950989	29.9521
BERNOULLI	Urban100	img_007_SRF_2_HR	160	0.944797	29.4425
BERNOULLI	Urban100	img_007_SRF_2_HR	170	0.93321	28.4874
BERNOULLI	Urban100	img_007_SRF_2_HR	180	0.921065	27.5486
BERNOULLI	Urban100	img_007_SRF_2_HR	190	0.906521	26.8324
BERNOULLI	Urban100	img_007_SRF_2_HR	200	0.885037	25.8363
BERNOULLI	Urban100	img_007_SRF_2_HR	210	0.855406	24.7583
BERNOULLI	Urban100	img_007_SRF_2_HR	220	0.810684	23.2596
BERNOULLI	Urban100	img_007_SRF_2_HR	230	0.753139	21.9124
BERNOULLI	Urban100	img_007_SRF_2_HR	240	0.640396	19.6923
BERNOULLI	Urban100	img_020_SRF_2_HR	150	0.889312	23.8996
BERNOULLI	Urban100	img_020_SRF_2_HR	160	0.873633	23.3417
BERNOULLI	Urban100	img_020_SRF_2_HR	170	0.854882	22.7319
BERNOULLI	Urban100	img_020_SRF_2_HR	180	0.830851	22.0741
BERNOULLI	Urban100	img_020_SRF_2_HR	190	0.808467	21.4663
BERNOULLI	Urban100	img_020_SRF_2_HR	200	0.780259	20.9335
BERNOULLI	Urban100	img_020_SRF_2_HR	210	0.7386	20.1499
BERNOULLI	Urban100	img_020_SRF_2_HR	220	0.691337	19.4219
BERNOULLI	Urban100	img_020_SRF_2_HR	230	0.622935	18.4357
BERNOULLI	Urban100	img_020_SRF_2_HR	240	0.53888	17.4638
BERNOULLI	Urban100	img_047_SRF_2_HR	150	0.883152	23.6777
BERNOULLI	Urban100	img_047_SRF_2_HR	160	0.868552	23.1792
BERNOULLI	Urban100	img_047_SRF_2_HR	170	0.85179	22.6201
BERNOULLI	Urban100	img_047_SRF_2_HR	180	0.83191	22.1191
BERNOULLI	Urban100	img_047_SRF_2_HR	190	0.808622	21.6049
BERNOULLI	Urban100	img_047_SRF_2_HR	200	0.78187	21.0232
BERNOULLI	Urban100	img_047_SRF_2_HR	210	0.738855	20.2866
BERNOULLI	Urban100	img_047_SRF_2_HR	220	0.695366	19.6068
BERNOULLI	Urban100	img_047_SRF_2_HR	230	0.634081	18.8042
BERNOULLI	Urban100	img_047_SRF_2_HR	240	0.554833	17.8363
BERNOULLI	Urban100	img_008_SRF_2_HR	150	0.858021	23.247
BERNOULLI	Urban100	img_008_SRF_2_HR	160	0.836897	22.7627
BERNOULLI	Urban100	img_008_SRF_2_HR	170	0.815536	22.2187
BERNOULLI	Urban100	img_008_SRF_2_HR	180	0.791153	21.6655
BERNOULLI	Urban100	img_008_SRF_2_HR	190	0.756145	21.0935
BERNOULLI	Urban100	img_008_SRF_2_HR	200	0.72228	20.4853
BERNOULLI	Urban100	img_008_SRF_2_HR	210	0.667635	19.7255
BERNOULLI	Urban100	img_008_SRF_2_HR	220	0.606377	19.0382
BERNOULLI	Urban100	img_008_SRF_2_HR	230	0.534734	18.3764
BERNOULLI	Urban100	img_008_SRF_2_HR	240	0.419188	17.3488
BERNOULLI	Urban100	img_045_SRF_2_HR	150	0.923679	26.1381
BERNOULLI	Urban100	img_045_SRF_2_HR	160	0.911735	25.482
BERNOULLI	Urban100	img_045_SRF_2_HR	170	0.894325	24.7391
BERNOULLI	Urban100	img_045_SRF_2_HR	180	0.876287	24.0238
BERNOULLI	Urban100	img_045_SRF_2_HR	190	0.848834	23.2195
BERNOULLI	Urban100	img_045_SRF_2_HR	200	0.811881	22.2509
BERNOULLI	Urban100	img_045_SRF_2_HR	210	0.763679	21.1547
BERNOULLI	Urban100	img_045_SRF_2_HR	220	0.694038	20.0014
BERNOULLI	Urban100	img_045_SRF_2_HR	230	0.598296	18.6625
BERNOULLI	Urban100	img_045_SRF_2_HR	240	0.442637	16.8821
BERNOULLI	Urban100	img_043_SRF_2_HR	150	0.951029	27.8175
BERNOULLI	Urban100	img_043_SRF_2_HR	160	0.945943	27.3315
BERNOULLI	Urban100	img_043_SRF_2_HR	170	0.935465	26.1068
BERNOULLI	Urban100	img_043_SRF_2_HR	180	0.926278	25.3222
BERNOULLI	Urban100	img_043_SRF_2_HR	190	0.91206	24.0794
BERNOULLI	Urban100	img_043_SRF_2_HR	200	0.894116	22.7639
BERNOULLI	Urban100	img_043_SRF_2_HR	210	0.873603	21.9522
BERNOULLI	Urban100	img_043_SRF_2_HR	220	0.836155	20.2315
BERNOULLI	Urban100	img_043_SRF_2_HR	230	0.782046	18.311
BERNOULLI	Urban100	img_043_SRF_2_HR	240	0.686948	15.6626
BERNOULLI	Urban100	img_048_SRF_2_HR	150	0.899565	21.9553
BERNOULLI	Urban100	img_048_SRF_2_HR	160	0.882941	21.306
BERNOULLI	Urban100	img_048_SRF_2_HR	170	0.867582	20.7607
BERNOULLI	Urban100	img_048_SRF_2_HR	180	0.850075	20.2494
BERNOULLI	Urban100	img_048_SRF_2_HR	190	0.82401	19.5491
BERNOULLI	Urban100	img_048_SRF_2_HR	200	0.798458	18.9643
BERNOULLI	Urban100	img_048_SRF_2_HR	210	0.763826	18.288
BERNOULLI	Urban100	img_048_SRF_2_HR	220	0.718228	17.4679
BERNOULLI	Urban100	img_048_SRF_2_HR	230	0.659882	16.6415
BERNOULLI	Urban100	img_048_SRF_2_HR	240	0.581424	15.6854
BERNOULLI	Urban100	img_061_SRF_2_HR	150	0.89091	26.5594
BERNOULLI	Urban100	img_061_SRF_2_HR	160	0.876827	26.0011
BERNOULLI	Urban100	img_061_SRF_2_HR	170	0.860674	25.4216
BERNOULLI	Urban100	img_061_SRF_2_HR	180	0.839067	24.7808
BERNOULLI	Urban100	img_061_SRF_2_HR	190	0.81654	24.1341
BERNOULLI	Urban100	img_061_SRF_2_HR	200	0.784869	23.5066
BERNOULLI	Urban100	img_061_SRF_2_HR	210	0.751427	22.8415
BERNOULLI	Urban100	img_061_SRF_2_HR	220	0.706693	21.9917
BERNOULLI	Urban100	img_061_SRF_2_HR	230	0.636567	20.9378
BERNOULLI	Urban100	img_061_SRF_2_HR	240	0.54904	19.7522
BERNOULLI	Urban100	img_015_SRF_2_HR	150	0.914866	27.3902
BERNOULLI	Urban100	img_015_SRF_2_HR	160	0.906734	26.8856
BERNOULLI	Urban100	img_015_SRF_2_HR	170	0.892531	26.212
BERNOULLI	Urban100	img_015_SRF_2_HR	180	0.876116	25.4787
BERNOULLI	Urban100	img_015_SRF_2_HR	190	0.858068	24.8393
BERNOULLI	Urban100	img_015_SRF_2_HR	200	0.833309	24.0346
BERNOULLI	Urban100	img_015_SRF_2_HR	210	0.806894	23.1788
BERNOULLI	Urban100	img_015_SRF_2_HR	220	0.764319	22.2159
BERNOULLI	Urban100	img_015_SRF_2_HR	230	0.707452	20.9298
BERNOULLI	Urban100	img_015_SRF_2_HR	240	0.612535	19.2499
BERNOULLI	Urban100	img_049_SRF_2_HR	150	0.912614	24.0138
BERNOULLI	Urban100	img_049_SRF_2_HR	160	0.89818	23.3767
BERNOULLI	Urban100	img_049_SRF_2_HR	170	0.881754	22.7549
BERNOULLI	Urban100	img_049_SRF_2_HR	180	0.863934	22.0923
BERNOULLI	Urban100	img_049_SRF_2_HR	190	0.838565	21.517
BERNOULLI	Urban100	img_049_SRF_2_HR	200	0.812098	20.7401
BERNOULLI	Urban100	img_049_SRF_2_HR	210	0.770161	19.7996
BERNOULLI	Urban100	img_049_SRF_2_HR	220	0.715774	18.8919
BERNOULLI	Urban100	img_049_SRF_2_HR	230	0.639632	17.5372
BERNOULLI	Urban100	img_049_SRF_2_HR	240	0.524167	16.1723
BERNOULLI	Urban100	img_087_SRF_2_HR	150	0.951078	28.5779
BERNOULLI	Urban100	img_087_SRF_2_HR	160	0.943283	27.8885
BERNOULLI	Urban100	img_087_SRF_2_HR	170	0.932937	27.0509
BERNOULLI	Urban100	img_087_SRF_2_HR	180	0.919679	26.0929
BERNOULLI	Urban100	img_087_SRF_2_HR	190	0.904097	25.286
BERNOULLI	Urban100	img_087_SRF_2_HR	200	0.883886	24.3353
BERNOULLI	Urban100	img_087_SRF_2_HR	210	0.856548	23.2921
BERNOULLI	Urban100	img_087_SRF_2_HR	220	0.81714	22.1775
BERNOULLI	Urban100	img_087_SRF_2_HR	230	0.759633	20.862
BERNOULLI	Urban100	img_087_SRF_2_HR	240	0.675805	19.3806
BERNOULLI	Urban100	img_096_SRF_2_HR	150	0.942297	27.7616
BERNOULLI	Urban100	img_096_SRF_2_HR	160	0.932	27.0461
BERNOULLI	Urban100	img_096_SRF_2_HR	170	0.918974	26.2234
BERNOULLI	Urban100	img_096_SRF_2_HR	180	0.909536	25.6447
BERNOULLI	Urban100	img_096_SRF_2_HR	190	0.889631	24.7489
BERNOULLI	Urban100	img_096_SRF_2_HR	200	0.866239	23.8169
BERNOULLI	Urban100	img_096_SRF_2_HR	210	0.833294	22.8578
BERNOULLI	Urban100	img_096_SRF_2_HR	220	0.788372	21.7413
BERNOULLI	Urban100	img_096_SRF_2_HR	230	0.720366	20.4708
BERNOULLI	Urban100	img_096_SRF_2_HR	240	0.615738	18.9132
BERNOULLI	Urban100	img_094_SRF_2_HR	150	0.927531	30.529
BERNOULLI	Urban100	img_094_SRF_2_HR	160	0.917854	29.9523
BERNOULLI	Urban100	img_094_SRF_2_HR	170	0.907408	29.3562
BERNOULLI	Urban100	img_094_SRF_2_HR	180	0.892079	28.5817
BERNOULLI	Urban100	img_094_SRF_2_HR	190	0.874724	27.8503
BERNOULLI	Urban100	img_094_SRF_2_HR	200	0.855877	27.2426
BERNOULLI	Urban100	img_094_SRF_2_HR	210	0.825789	26.3151
BERNOULLI	Urban100	img_094_SRF_2_HR	220	0.794993	25.3402
BERNOULLI	Urban100	img_094_SRF_2_HR	230	0.744154	24.2136
BERNOULLI	Urban100	img_094_SRF_2_HR	240	0.657246	22.7718
BERNOULLI	Urban100	img_021_SRF_2_HR	150	0.917785	31.5134
BERNOULLI	Urban100	img_021_SRF_2_HR	160	0.907746	30.8541
BERNOULLI	Urban100	img_021_SRF_2_HR	170	0.897082	30.2912
BERNOULLI	Urban100	img_021_SRF_2_HR	180	0.884729	29.6368
BERNOULLI	Urban100	img_021_SRF_2_HR	190	0.866415	28.7282
BERNOULLI	Urban100	img_021_SRF_2_HR	200	0.845328	27.8986
BERNOULLI	Urban100	img_021_SRF_2_HR	210	0.824894	27.1411
BERNOULLI	Urban100	img_021_SRF_2_HR	220	0.787742	25.9376
BERNOULLI	Urban100	img_021_SRF_2_HR	230	0.741853	24.6637
BERNOULLI	Urban100	img_021_SRF_2_HR	240	0.673239	23.181
BERNOULLI	Urban100	img_071_SRF_2_HR	150	0.888145	31.033
BERNOULLI	Urban100	img_071_SRF_2_HR	160	0.87525	30.728
BERNOULLI	Urban100	img_071_SRF_2_HR	170	0.85679	29.8773
BERNOULLI	Urban100	img_071_SRF_2_HR	180	0.836007	29.2425
BERNOULLI	Urban100	img_071_SRF_2_HR	190	0.808426	28.5847
BERNOULLI	Urban100	img_071_SRF_2_HR	200	0.780319	27.8492
BERNOULLI	Urban100	img_071_SRF_2_HR	210	0.746321	27.013
BERNOULLI	Urban100	img_071_SRF_2_HR	220	0.691995	26.1523
BERNOULLI	Urban100	img_071_SRF_2_HR	230	0.626923	25.0518
BERNOULLI	Urban100	img_071_SRF_2_HR	240	0.540339	24.0048
BERNOULLI	Urban100	img_098_SRF_2_HR	150	0.820982	24.6735
BERNOULLI	Urban100	img_098_SRF_2_HR	160	0.799103	24.1185
BERNOULLI	Urban100	img_098_SRF_2_HR	170	0.774532	23.5961
BERNOULLI	Urban100	img_098_SRF_2_HR	180	0.745132	23.073
BERNOULLI	Urban100	img_098_SRF_2_HR	190	0.714759	22.5225
BERNOULLI	Urban100	img_098_SRF_2_HR	200	0.678771	21.9705
BERNOULLI	Urban100	img_098_SRF_2_HR	210	0.62799	21.297
BERNOULLI	Urban100	img_098_SRF_2_HR	220	0.568354	20.6074
BERNOULLI	Urban100	img_098_SRF_2_HR	230	0.49953	19.7666
BERNOULLI	Urban100	img_098_SRF_2_HR	240	0.403771	18.7698
BERNOULLI	Urban100	img_062_SRF_2_HR	150	0.873747	23.508
BERNOULLI	Urban100	img_062_SRF_2_HR	160	0.854922	22.8796
BERNOULLI	Urban100	img_062_SRF_2_HR	170	0.837227	22.4292
BERNOULLI	Urban100	img_062_SRF_2_HR	180	0.816648	21.8398
BERNOULLI	Urban100	img_062_SRF_2_HR	190	0.78687	21.1476
BERNOULLI	Urban100	img_062_SRF_2_HR	200	0.756974	20.5345
BERNOULLI	Urban100	img_062_SRF_2_HR	210	0.718575	19.891
BERNOULLI	Urban100	img_062_SRF_2_HR	220	0.673369	19.1969
BERNOULLI	Urban100	img_062_SRF_2_HR	230	0.60608	18.1446
BERNOULLI	Urban100	img_062_SRF_2_HR	240	0.520802	17.1735
BERNOULLI	Urban100	img_078_SRF_2_HR	150	0.86922	28.2036
BERNOULLI	Urban100	img_078_SRF_2_HR	160	0.853817	27.6224
BERNOULLI	Urban100	img_078_SRF_2_HR	170	0.836067	27.1311
BERNOULLI	Urban100	img_078_SRF_2_HR	180	0.813355	26.552
BERNOULLI	Urban100	img_078_SRF_2_HR	190	0.7903	25.9213
BERNOULLI	Urban100	img_078_SRF_2_HR	200	0.764046	25.5185
BERNOULLI	Urban100	img_078_SRF_2_HR	210	0.727968	24.7201
BERNOULLI	Urban100	img_078_SRF_2_HR	220	0.688743	24.1863
BERNOULLI	Urban100	img_078_SRF_2_HR	230	0.638541	23.3929
BERNOULLI	Urban100	img_078_SRF_2_HR	240	0.576885	22.5415
BERNOULLI	Urban100	img_077_SRF_2_HR	150	0.883511	26.8265
BERNOULLI	Urban100	img_077_SRF_2_HR	160	0.870905	26.4401
BERNOULLI	Urban100	img_077_SRF_2_HR	170	0.853646	25.8313
BERNOULLI	Urban100	img_077_SRF_2_HR	180	0.83553	25.3107
BERNOULLI	Urban100	img_077_SRF_2_HR	190	0.815125	24.794
BERNOULLI	Urban100	img_077_SRF_2_HR	200	0.792694	24.3192
BERNOULLI	Urban100	img_077_SRF_2_HR	210	0.758656	23.5659
BERNOULLI	Urban100	img_077_SRF_2_HR	220	0.716662	22.8346
BERNOULLI	Urban100	img_077_SRF_2_HR	230	0.662028	22.0248
BERNOULLI	Urban100	img_077_SRF_2_HR	240	0.589667	20.9423
BERNOULLI	Urban100	img_088_SRF_2_HR	150	0.853256	22.8748
BERNOULLI	Urban100	img_088_SRF_2_HR	160	0.833368	22.3954
BERNOULLI	Urban100	img_088_SRF_2_HR	170	0.81012	21.8029
BERNOULLI	Urban100	img_088_SRF_2_HR	180	0.785116	21.3153
BERNOULLI	Urban100	img_088_SRF_2_HR	190	0.751335	20.6436
BERNOULLI	Urban100	img_088_SRF_2_HR	200	0.718827	20.0634
BERNOULLI	Urban100	img_088_SRF_2_HR	210	0.669141	19.4073
BERNOULLI	Urban100	img_088_SRF_2_HR	220	0.604817	18.5507
BERNOULLI	Urban100	img_088_SRF_2_HR	230	0.538013	17.8175
BERNOULLI	Urban100	img_088_SRF_2_HR	240	0.420178	16.5834
BERNOULLI	Urban100	img_090_SRF_2_HR	150	0.971351	34.8314
BERNOULLI	Urban100	img_090_SRF_2_HR	160	0.966067	33.8975
BERNOULLI	Urban100	img_090_SRF_2_HR	170	0.96066	33.2732
BERNOULLI	Urban100	img_090_SRF_2_HR	180	0.952855	32.4593
BERNOULLI	Urban100	img_090_SRF_2_HR	190	0.939319	31.2984
BERNOULLI	Urban100	img_090_SRF_2_HR	200	0.925301	30.3525
BERNOULLI	Urban100	img_090_SRF_2_HR	210	0.902331	29.2624
BERNOULLI	Urban100	img_090_SRF_2_HR	220	0.862833	27.8176
BERNOULLI	Urban100	img_090_SRF_2_HR	230	0.810992	26.6178
BERNOULLI	Urban100	img_090_SRF_2_HR	240	0.716635	24.8633
BERNOULLI	Urban100	img_033_SRF_2_HR	150	0.901246	29.5193
BERNOULLI	Urban100	img_033_SRF_2_HR	160	0.889717	29.1577
BERNOULLI	Urban100	img_033_SRF_2_HR	170	0.870993	28.1466
BERNOULLI	Urban100	img_033_SRF_2_HR	180	0.854598	27.5538
BERNOULLI	Urban100	img_033_SRF_2_HR	190	0.833514	26.8982
BERNOULLI	Urban100	img_033_SRF_2_HR	200	0.807268	26.2197
BERNOULLI	Urban100	img_033_SRF_2_HR	210	0.774402	25.3
BERNOULLI	Urban100	img_033_SRF_2_HR	220	0.734408	24.1771
BERNOULLI	Urban100	img_033_SRF_2_HR	230	0.676575	23.1534
BERNOULLI	Urban100	img_033_SRF_2_HR	240	0.602119	21.7645
BERNOULLI	Urban100	img_024_SRF_2_HR	150	0.915762	24.5864
BERNOULLI	Urban100	img_024_SRF_2_HR	160	0.904638	23.9803
BERNOULLI	Urban100	img_024_SRF_2_HR	170	0.886319	23.2524
BERNOULLI	Urban100	img_024_SRF_2_HR	180	0.864577	22.4074
BERNOULLI	Urban100	img_024_SRF_2_HR	190	0.835938	21.4797
BERNOULLI	Urban100	img_024_SRF_2_HR	200	0.803759	20.7116
BERNOULLI	Urban100	img_024_SRF_2_HR	210	0.755466	19.6056
BERNOULLI	Urban100	img_024_SRF_2_HR	220	0.684588	18.4151
BERNOULLI	Urban100	img_024_SRF_2_HR	230	0.594666	17.2746
BERNOULLI	Urban100	img_024_SRF_2_HR	240	0.452741	15.6292
BERNOULLI	Urban100	img_080_SRF_2_HR	150	0.971827	37.2659
BERNOULLI	Urban100	img_080_SRF_2_HR	160	0.967171	36.2987
BERNOULLI	Urban100	img_080_SRF_2_HR	170	0.962189	35.6115
BERNOULLI	Urban100	img_080_SRF_2_HR	180	0.958065	35.1413
BERNOULLI	Urban100	img_080_SRF_2_HR	190	0.949014	34.1123
BERNOULLI	Urban100	img_080_SRF_2_HR	200	0.93883	33.0783
BERNOULLI	Urban100	img_080_SRF_2_HR	210	0.925249	32.2394
BERNOULLI	Urban100	img_080_SRF_2_HR	220	0.908334	31.0605
BERNOULLI	Urban100	img_080_SRF_2_HR	230	0.87833	29.7273
BERNOULLI	Urban100	img_080_SRF_2_HR	240	0.831967	27.9057
BERNOULLI	Urban100	img_051_SRF_2_HR	150	0.929856	28.256
BERNOULLI	Urban100	img_051_SRF_2_HR	160	0.917784	27.4257
BERNOULLI	Urban100	img_051_SRF_2_HR	170	0.907585	27.0223
BERNOULLI	Urban100	img_051_SRF_2_HR	180	0.889076	26.1803
BERNOULLI	Urban100	img_051_SRF_2_HR	190	0.871199	25.5241
BERNOULLI	Urban100	img_051_SRF_2_HR	200	0.845816	24.7265
BERNOULLI	Urban100	img_051_SRF_2_HR	210	0.814074	23.9641
BERNOULLI	Urban100	img_051_SRF_2_HR	220	0.774217	23.0389
BERNOULLI	Urban100	img_051_SRF_2_HR	230	0.71566	22.0161
BERNOULLI	Urban100	img_051_SRF_2_HR	240	0.617027	20.5681
BERNOULLI	Urban100	img_005_SRF_2_HR	150	0.951803	26.8341
BERNOULLI	Urban100	img_005_SRF_2_HR	160	0.946378	26.2956
BERNOULLI	Urban100	img_005_SRF_2_HR	170	0.9375	25.4699
BERNOULLI	Urban100	img_005_SRF_2_HR	180	0.928953	24.8831
BERNOULLI	Urban100	img_005_SRF_2_HR	190	0.9142	23.9022
BERNOULLI	Urban100	img_005_SRF_2_HR	200	0.898962	23.0163
BERNOULLI	Urban100	img_005_SRF_2_HR	210	0.873995	21.8956
BERNOULLI	Urban100	img_005_SRF_2_HR	220	0.841467	20.877
BERNOULLI	Urban100	img_005_SRF_2_HR	230	0.785362	19.3492
BERNOULLI	Urban100	img_005_SRF_2_HR	240	0.700797	17.766
BERNOULLI	Urban100	img_052_SRF_2_HR	150	0.940651	29.3469
BERNOULLI	Urban100	img_052_SRF_2_HR	160	0.932332	28.7425
BERNOULLI	Urban100	img_052_SRF_2_HR	170	0.920182	27.8086
BERNOULLI	Urban100	img_052_SRF_2_HR	180	0.906301	26.9371
BERNOULLI	Urban100	img_052_SRF_2_HR	190	0.887659	26.0429
BERNOULLI	Urban100	img_052_SRF_2_HR	200	0.863758	24.9635
BERNOULLI	Urban100	img_052_SRF_2_HR	210	0.836893	24.0223
BERNOULLI	Urban100	img_052_SRF_2_HR	220	0.799162	22.7869
BERNOULLI	Urban100	img_052_SRF_2_HR	230	0.731236	21.2064
BERNOULLI	Urban100	img_052_SRF_2_HR	240	0.632653	19.383
BERNOULLI	Urban100	img_083_SRF_2_HR	150	0.893992	25.5183
BERNOULLI	Urban100	img_083_SRF_2_HR	160	0.879587	24.9651
BERNOULLI	Urban100	img_083_SRF_2_HR	170	0.863477	24.4213
BERNOULLI	Urban100	img_083_SRF_2_HR	180	0.841091	23.713
BERNOULLI	Urban100	img_083_SRF_2_HR	190	0.814221	23.0044
BERNOULLI	Urban100	img_083_SRF_2_HR	200	0.786941	22.3427
BERNOULLI	Urban100	img_083_SRF_2_HR	210	0.745967	21.4804
BERNOULLI	Urban100	img_083_SRF_2_HR	220	0.692671	20.6739
BERNOULLI	Urban100	img_083_SRF_2_HR	230	0.617014	19.4097
BERNOULLI	Urban100	img_083_SRF_2_HR	240	0.512122	18.1193
BERNOULLI	Urban100	img_050_SRF_2_HR	150	0.902844	26.8702
BERNOULLI	Urban100	img_050_SRF_2_HR	160	0.889842	26.2368
BERNOULLI	Urban100	img_050_SRF_2_HR	170	0.873859	25.6096
BERNOULLI	Urban100	img_050_SRF_2_HR	180	0.857295	25.1326
BERNOULLI	Urban100	img_050_SRF_2_HR	190	0.835499	24.5335
BERNOULLI	Urban100	img_050_SRF_2_HR	200	0.809164	23.7853
BERNOULLI	Urban100	img_050_SRF_2_HR	210	0.782578	23.2741
BERNOULLI	Urban100	img_050_SRF_2_HR	220	0.737179	22.3544
BERNOULLI	Urban100	img_050_SRF_2_HR	230	0.682742	21.5188
BERNOULLI	Urban100	img_050_SRF_2_HR	240	0.602353	20.3302
BERNOULLI	Urban100	img_066_SRF_2_HR	150	0.900847	26.5797
BERNOULLI	Urban100	img_066_SRF_2_HR	160	0.887123	26.0123
BERNOULLI	Urban100	img_066_SRF_2_HR	170	0.871373	25.4166
BERNOULLI	Urban100	img_066_SRF_2_HR	180	0.854084	24.9289
BERNOULLI	Urban100	img_066_SRF_2_HR	190	0.833498	24.3464
BERNOULLI	Urban100	img_066_SRF_2_HR	200	0.801816	23.5342
BERNOULLI	Urban100	img_066_SRF_2_HR	210	0.771472	22.9192
BERNOULLI	Urban100	img_066_SRF_2_HR	220	0.728585	22.1577
BERNOULLI	Urban100	img_066_SRF_2_HR	230	0.66732	21.1555
BERNOULLI	Urban100	img_066_SRF_2_HR	240	0.569172	19.9328
BERNOULLI	Urban100	img_001_SRF_2_HR	150	0.916157	30.0508
BERNOULLI	Urban100	img_001_SRF_2_HR	160	0.904567	29.2205
BERNOULLI	Urban100	img_001_SRF_2_HR	170	0.89151	28.5351
BERNOULLI	Urban100	img_001_SRF_2_HR	180	0.876799	27.8745
BERNOULLI	Urban100	img_001_SRF_2_HR	190	0.860193	27.2255
BERNOULLI	Urban100	img_001_SRF_2_HR	200	0.836558	26.3439
BERNOULLI	Urban100	img_001_SRF_2_HR	210	0.811277	25.6194
BERNOULLI	Urban100	img_001_SRF_2_HR	220	0.773493	24.3741
BERNOULLI	Urban100	img_001_SRF_2_HR	230	0.71549	23.0951
BERNOULLI	Urban100	img_001_SRF_2_HR	240	0.624256	21.3065
BERNOULLI	Urban100	img_097_SRF_2_HR	150	0.930876	27.9445
BERNOULLI	Urban100	img_097_SRF_2_HR	160	0.916543	27.1128
BERNOULLI	Urban100	img_097_SRF_2_HR	170	0.904922	26.5611
BERNOULLI	Urban100	img_097_SRF_2_HR	180	0.888619	25.8986
BERNOULLI	Urban100	img_097_SRF_2_HR	190	0.868788	25.1382
BERNOULLI	Urban100	img_097_SRF_2_HR	200	0.846851	24.4748
BERNOULLI	Urban100	img_097_SRF_2_HR	210	0.810983	23.4557
BERNOULLI	Urban100	img_097_SRF_2_HR	220	0.770969	22.5921
BERNOULLI	Urban100	img_097_SRF_2_HR	230	0.710865	21.5525
BERNOULLI	Urban100	img_097_SRF_2_HR	240	0.619007	20.2147
BERNOULLI	Urban100	img_089_SRF_2_HR	150	0.893838	29.2194
BERNOULLI	Urban100	img_089_SRF_2_HR	160	0.878707	28.7189
BERNOULLI	Urban100	img_089_SRF_2_HR	170	0.861771	28.0426
BERNOULLI	Urban100	img_089_SRF_2_HR	180	0.839921	27.476
BERNOULLI	Urban100	img_089_SRF_2_HR	190	0.815311	26.751
BERNOULLI	Urban100	img_089_SRF_2_HR	200	0.786548	26.1581
BERNOULLI	Urban100	img_089_SRF_2_HR	210	0.74862	25.2638
BERNOULLI	Urban100	img_089_SRF_2_HR	220	0.705325	24.5663
BERNOULLI	Urban100	img_089_SRF_2_HR	230	0.650239	23.5928
BERNOULLI	Urban100	img_089_SRF_2_HR	240	0.565786	22.3109
BERNOULLI	Urban100	img_023_SRF_2_HR	150	0.726542	13.7805
BERNOULLI	Urban100	img_023_SRF_2_HR	160	0.718477	13.759
BERNOULLI	Urban100	img_023_SRF_2_HR	170	0.711462	13.733
BERNOULLI	Urban100	img_023_SRF_2_HR	180	0.699854	13.6863
BERNOULLI	Urban100	img_023_SRF_2_HR	190	0.682693	13.6298
BERNOULLI	Urban100	img_023_SRF_2_HR	200	0.659215	13.5561
BERNOULLI	Urban100	img_023_SRF_2_HR	210	0.623071	13.4325
BERNOULLI	Urban100	img_023_SRF_2_HR	220	0.571054	13.2517
BERNOULLI	Urban100	img_023_SRF_2_HR	230	0.498234	13.0712
BERNOULLI	Urban100	img_023_SRF_2_HR	240	0.376034	12.7036
BERNOULLI	Urban100	img_022_SRF_2_HR	150	0.92013	29.5589
BERNOULLI	Urban100	img_022_SRF_2_HR	160	0.911723	29.1629
BERNOULLI	Urban100	img_022_SRF_2_HR	170	0.90022	28.6138
BERNOULLI	Urban100	img_022_SRF_2_HR	180	0.883722	27.9586
BERNOULLI	Urban100	img_022_SRF_2_HR	190	0.863824	27.139
BERNOULLI	Urban100	img_022_SRF_2_HR	200	0.849168	26.7519
BERNOULLI	Urban100	img_022_SRF_2_HR	210	0.819205	25.8851
BERNOULLI	Urban100	img_022_SRF_2_HR	220	0.787321	25.1905
BERNOULLI	Urban100	img_022_SRF_2_HR	230	0.74568	24.3903
BERNOULLI	Urban100	img_022_SRF_2_HR	240	0.674371	23.0823
BERNOULLI	Urban100	img_055_SRF_2_HR	150	0.959651	32.0177
BERNOULLI	Urban100	img_055_SRF_2_HR	160	0.951257	30.6505
BERNOULLI	Urban100	img_055_SRF_2_HR	170	0.941477	29.8158
BERNOULLI	Urban100	img_055_SRF_2_HR	180	0.927901	28.6401
BERNOULLI	Urban100	img_055_SRF_2_HR	190	0.911088	27.519
BERNOULLI	Urban100	img_055_SRF_2_HR	200	0.888461	26.446
BERNOULLI	Urban100	img_055_SRF_2_HR	210	0.857968	24.8734
BERNOULLI	Urban100	img_055_SRF_2_HR	220	0.811292	23.5259
BERNOULLI	Urban100	img_055_SRF_2_HR	230	0.740045	21.6121
BERNOULLI	Urban100	img_055_SRF_2_HR	240	0.642042	20.0474
BERNOULLI	Urban100	img_038_SRF_2_HR	150	0.834046	28.9473
BERNOULLI	Urban100	img_038_SRF_2_HR	160	0.812902	28.3703
BERNOULLI	Urban100	img_038_SRF_2_HR	170	0.792228	28.0042
BERNOULLI	Urban100	img_038_SRF_2_HR	180	0.759774	27.3577
BERNOULLI	Urban100	img_038_SRF_2_HR	190	0.730145	26.8169
BERNOULLI	Urban100	img_038_SRF_2_HR	200	0.68983	26.1486
BERNOULLI	Urban100	img_038_SRF_2_HR	210	0.650629	25.5287
BERNOULLI	Urban100	img_038_SRF_2_HR	220	0.595252	24.8555
BERNOULLI	Urban100	img_038_SRF_2_HR	230	0.538287	24.163
BERNOULLI	Urban100	img_038_SRF_2_HR	240	0.456906	23.1325
BERNOULLI	Urban100	img_013_SRF_2_HR	150	0.932768	29.6537
BERNOULLI	Urban100	img_013_SRF_2_HR	160	0.923503	29.0736
BERNOULLI	Urban100	img_013_SRF_2_HR	170	0.911856	28.2314
BERNOULLI	Urban100	img_013_SRF_2_HR	180	0.898745	27.6506
BERNOULLI	Urban100	img_013_SRF_2_HR	190	0.880623	26.7277
BERNOULLI	Urban100	img_013_SRF_2_HR	200	0.861092	26.1122
BERNOULLI	Urban100	img_013_SRF_2_HR	210	0.827905	24.9149
BERNOULLI	Urban100	img_013_SRF_2_HR	220	0.789442	23.8299
BERNOULLI	Urban100	img_013_SRF_2_HR	230	0.729879	22.646
BERNOULLI	Urban100	img_013_SRF_2_HR	240	0.63825	21.1294
BERNOULLI	Urban100	img_046_SRF_2_HR	150	0.908079	28.2447
BERNOULLI	Urban100	img_046_SRF_2_HR	160	0.898002	27.8465
BERNOULLI	Urban100	img_046_SRF_2_HR	170	0.88366	27.2494
BERNOULLI	Urban100	img_046_SRF_2_HR	180	0.865929	26.6699
BERNOULLI	Urban100	img_046_SRF_2_HR	190	0.851893	26.1908
BERNOULLI	Urban100	img_046_SRF_2_HR	200	0.829016	25.5576
BERNOULLI	Urban100	img_046_SRF_2_HR	210	0.799552	24.8328
BERNOULLI	Urban100	img_046_SRF_2_HR	220	0.768929	24.1974
BERNOULLI	Urban100	img_046_SRF_2_HR	230	0.728531	23.3759
BERNOULLI	Urban100	img_046_SRF_2_HR	240	0.664156	22.2308
BERNOULLI	Urban100	img_091_SRF_2_HR	150	0.873239	25.8347
BERNOULLI	Urban100	img_091_SRF_2_HR	160	0.856063	25.3369
BERNOULLI	Urban100	img_091_SRF_2_HR	170	0.83391	24.6718
BERNOULLI	Urban100	img_091_SRF_2_HR	180	0.810454	24.0739
BERNOULLI	Urban100	img_091_SRF_2_HR	190	0.776596	23.3117
BERNOULLI	Urban100	img_091_SRF_2_HR	200	0.741613	22.7135
BERNOULLI	Urban100	img_091_SRF_2_HR	210	0.698898	22.0153
BERNOULLI	Urban100	img_091_SRF_2_HR	220	0.636783	21.0978
BERNOULLI	Urban100	img_091_SRF_2_HR	230	0.565986	20.2276
BERNOULLI	Urban100	img_091_SRF_2_HR	240	0.450057	18.9335
BERNOULLI	Urban100	img_092_SRF_2_HR	150	0.857978	22.3522
BERNOULLI	Urban100	img_092_SRF_2_HR	160	0.839667	21.7687
BERNOULLI	Urban100	img_092_SRF_2_HR	170	0.817421	21.194
BERNOULLI	Urban100	img_092_SRF_2_HR	180	0.795675	20.6375
BERNOULLI	Urban100	img_092_SRF_2_HR	190	0.763524	19.8973
BERNOULLI	Urban100	img_092_SRF_2_HR	200	0.731576	19.3716
BERNOULLI	Urban100	img_092_SRF_2_HR	210	0.683664	18.5979
BERNOULLI	Urban100	img_092_SRF_2_HR	220	0.638145	17.9889
BERNOULLI	Urban100	img_092_SRF_2_HR	230	0.569935	17.1273
BERNOULLI	Urban100	img_092_SRF_2_HR	240	0.479232	16.0239
BERNOULLI	Urban100	img_035_SRF_2_HR	150	0.949645	29.1761
BERNOULLI	Urban100	img_035_SRF_2_HR	160	0.941989	28.4989
BERNOULLI	Urban100	img_035_SRF_2_HR	170	0.93054	27.5922
BERNOULLI	Urban100	img_035_SRF_2_HR	180	0.918138	26.862
BERNOULLI	Urban100	img_035_SRF_2_HR	190	0.903905	26.1201
BERNOULLI	Urban100	img_035_SRF_2_HR	200	0.882451	25.0868
BERNOULLI	Urban100	img_035_SRF_2_HR	210	0.857284	24.0875
BERNOULLI	Urban100	img_035_SRF_2_HR	220	0.812735	22.8342
BERNOULLI	Urban100	img_035_SRF_2_HR	230	0.760465	21.6245
BERNOULLI	Urban100	img_035_SRF_2_HR	240	0.655086	19.5535
BERNOULLI	Urban100	img_081_SRF_2_HR	150	0.915185	29.48
BERNOULLI	Urban100	img_081_SRF_2_HR	160	0.909152	28.9584
BERNOULLI	Urban100	img_081_SRF_2_HR	170	0.902988	28.515
BERNOULLI	Urban100	img_081_SRF_2_HR	180	0.893556	27.728
BERNOULLI	Urban100	img_081_SRF_2_HR	190	0.882167	26.8919
BERNOULLI	Urban100	img_081_SRF_2_HR	200	0.866825	25.9344
BERNOULLI	Urban100	img_081_SRF_2_HR	210	0.843741	24.7392
BERNOULLI	Urban100	img_081_SRF_2_HR	220	0.812291	23.3354
BERNOULLI	Urban100	img_081_SRF_2_HR	230	0.763023	21.8881
BERNOULLI	Urban100	img_081_SRF_2_HR	240	0.666936	19.1774
BERNOULLI	Urban100	img_054_SRF_2_HR	150	0.908101	25.3711
BERNOULLI	Urban100	img_054_SRF_2_HR	160	0.897271	24.7735
BERNOULLI	Urban100	img_054_SRF_2_HR	170	0.881477	24.1775
BERNOULLI	Urban100	img_054_SRF_2_HR	180	0.862389	23.5163
BERNOULLI	Urban100	img_054_SRF_2_HR	190	0.838497	22.7366
BERNOULLI	Urban100	img_054_SRF_2_HR	200	0.80649	22.03
BERNOULLI	Urban100	img_054_SRF_2_HR	210	0.778442	21.3645
BERNOULLI	Urban100	img_054_SRF_2_HR	220	0.726503	20.6008
BERNOULLI	Urban100	img_054_SRF_2_HR	230	0.656011	19.433
BERNOULLI	Urban100	img_054_SRF_2_HR	240	0.55632	18.2874
BERNOULLI	Urban100	img_085_SRF_2_HR	150	0.957373	29.6053
BERNOULLI	Urban100	img_085_SRF_2_HR	160	0.952221	29.0278
BERNOULLI	Urban100	img_085_SRF_2_HR	170	0.945079	28.3642
BERNOULLI	Urban100	img_085_SRF_2_HR	180	0.93465	27.5271
BERNOULLI	Urban100	img_085_SRF_2_HR	190	0.924738	26.7956
BERNOULLI	Urban100	img_085_SRF_2_HR	200	0.910599	25.9704
BERNOULLI	Urban100	img_085_SRF_2_HR	210	0.893184	25.0285
BERNOULLI	Urban100	img_085_SRF_2_HR	220	0.870173	24.2242
BERNOULLI	Urban100	img_085_SRF_2_HR	230	0.834223	23.0461
BERNOULLI	Urban100	img_085_SRF_2_HR	240	0.775762	21.5039
BERNOULLI	Urban100	img_009_SRF_2_HR	150	0.959981	36.0881
BERNOULLI	Urban100	img_009_SRF_2_HR	160	0.951998	35.1074
BERNOULLI	Urban100	img_009_SRF_2_HR	170	0.94596	34.7262
BERNOULLI	Urban100	img_009_SRF_2_HR	180	0.938007	33.7566
BERNOULLI	Urban100	img_009_SRF_2_HR	190	0.922383	32.6507
BERNOULLI	Urban100	img_009_SRF_2_HR	200	0.907283	31.8734
BERNOULLI	Urban100	img_009_SRF_2_HR	210	0.890445	31.1836
BERNOULLI	Urban100	img_009_SRF_2_HR	220	0.864804	30.2526
BERNOULLI	Urban100	img_009_SRF_2_HR	230	0.830852	29.1268
BERNOULLI	Urban100	img_009_SRF_2_HR	240	0.783435	27.8251
BERNOULLI	Urban100	img_068_SRF_2_HR	150	0.919198	29.4121
BERNOULLI	Urban100	img_068_SRF_2_HR	160	0.908478	28.8682
BERNOULLI	Urban100	img_068_SRF_2_HR	170	0.894273	28.1849
BERNOULLI	Urban100	img_068_SRF_2_HR	180	0.879351	27.5903
BERNOULLI	Urban100	img_068_SRF_2_HR	190	0.857614	26.8758
BERNOULLI	Urban100	img_068_SRF_2_HR	200	0.832435	26.1471
BERNOULLI	Urban100	img_068_SRF_2_HR	210	0.797821	25.2543
BERNOULLI	Urban100	img_068_SRF_2_HR	220	0.759642	24.4451
BERNOULLI	Urban100	img_068_SRF_2_HR	230	0.694959	23.1606
BERNOULLI	Urban100	img_068_SRF_2_HR	240	0.603118	21.7685
BERNOULLI	Urban100	img_025_SRF_2_HR	150	0.959331	32.3158
BERNOULLI	Urban100	img_025_SRF_2_HR	160	0.954217	31.6589
BERNOULLI	Urban100	img_025_SRF_2_HR	170	0.946947	30.7636
BERNOULLI	Urban100	img_025_SRF_2_HR	180	0.939692	30.1239
BERNOULLI	Urban100	img_025_SRF_2_HR	190	0.926283	28.7229
BERNOULLI	Urban100	img_025_SRF_2_HR	200	0.911901	27.7599
BERNOULLI	Urban100	img_025_SRF_2_HR	210	0.892621	26.4699
BERNOULLI	Urban100	img_025_SRF_2_HR	220	0.863494	24.9972
BERNOULLI	Urban100	img_025_SRF_2_HR	230	0.824003	23.5547
BERNOULLI	Urban100	img_025_SRF_2_HR	240	0.742217	20.7711
BERNOULLI	Urban100	img_095_SRF_2_HR	150	0.798155	24.1762
BERNOULLI	Urban100	img_095_SRF_2_HR	160	0.772746	23.6574
BERNOULLI	Urban100	img_095_SRF_2_HR	170	0.745595	23.2173
BERNOULLI	Urban100	img_095_SRF_2_HR	180	0.713533	22.6612
BERNOULLI	Urban100	img_095_SRF_2_HR	190	0.673744	22.1004
BERNOULLI	Urban100	img_095_SRF_2_HR	200	0.620525	21.3512
BERNOULLI	Urban100	img_095_SRF_2_HR	210	0.575567	20.8543
BERNOULLI	Urban100	img_095_SRF_2_HR	220	0.507931	20.1313
BERNOULLI	Urban100	img_095_SRF_2_HR	230	0.431977	19.3738
BERNOULLI	Urban100	img_095_SRF_2_HR	240	0.340123	18.5137
BERNOULLI	Urban100	img_040_SRF_2_HR	150	0.96149	24.2648
BERNOULLI	Urban100	img_040_SRF_2_HR	160	0.959388	24.2351
BERNOULLI	Urban100	img_040_SRF_2_HR	170	0.953264	23.7518
BERNOULLI	Urban100	img_040_SRF_2_HR	180	0.94706	23.2389
BERNOULLI	Urban100	img_040_SRF_2_HR	190	0.935474	22.2687
BERNOULLI	Urban100	img_040_SRF_2_HR	200	0.915186	21.1076
BERNOULLI	Urban100	img_040_SRF_2_HR	210	0.892845	20.1391
BERNOULLI	Urban100	img_040_SRF_2_HR	220	0.853465	18.677
BERNOULLI	Urban100	img_040_SRF_2_HR	230	0.790861	17.0303
BERNOULLI	Urban100	img_040_SRF_2_HR	240	0.67955	14.8627
BERNOULLI	Urban100	img_070_SRF_2_HR	150	0.881483	27.7073
BERNOULLI	Urban100	img_070_SRF_2_HR	160	0.866875	27.19
BERNOULLI	Urban100	img_070_SRF_2_HR	170	0.85179	26.6608
BERNOULLI	Urban100	img_070_SRF_2_HR	180	0.831706	26.0355
BERNOULLI	Urban100	img_070_SRF_2_HR	190	0.810193	25.5155
BERNOULLI	Urban100	img_070_SRF_2_HR	200	0.783279	24.8946
BERNOULLI	Urban100	img_070_SRF_2_HR	210	0.749916	24.21
BERNOULLI	Urban100	img_070_SRF_2_HR	220	0.710842	23.4355
BERNOULLI	Urban100	img_070_SRF_2_HR	230	0.656123	22.6336
BERNOULLI	Urban100	img_070_SRF_2_HR	240	0.577166	21.4885
BERNOULLI	Urban100	img_042_SRF_2_HR	150	0.946695	29.0035
BERNOULLI	Urban100	img_042_SRF_2_HR	160	0.937173	28.0415
BERNOULLI	Urban100	img_042_SRF_2_HR	170	0.92771	27.4551
BERNOULLI	Urban100	img_042_SRF_2_HR	180	0.91661	26.6865
BERNOULLI	Urban100	img_042_SRF_2_HR	190	0.899274	25.7514
BERNOULLI	Urban100	img_042_SRF_2_HR	200	0.875861	24.702
BERNOULLI	Urban100	img_042_SRF_2_HR	210	0.848781	23.787
BERNOULLI	Urban100	img_042_SRF_2_HR	220	0.811323	22.6236
BERNOULLI	Urban100	img_042_SRF_2_HR	230	0.751013	21.108
BERNOULLI	Urban100	img_042_SRF_2_HR	240	0.659451	19.534
BERNOULLI	Urban100	img_056_SRF_2_HR	150	0.91259	26.491
BERNOULLI	Urban100	img_056_SRF_2_HR	160	0.900485	25.9359
BERNOULLI	Urban100	img_056_SRF_2_HR	170	0.886956	25.3258
BERNOULLI	Urban100	img_056_SRF_2_HR	180	0.864744	24.5245
BERNOULLI	Urban100	img_056_SRF_2_HR	190	0.842657	23.8253
BERNOULLI	Urban100	img_056_SRF_2_HR	200	0.812504	22.9961
BERNOULLI	Urban100	img_056_SRF_2_HR	210	0.775902	22.1958
BERNOULLI	Urban100	img_056_SRF_2_HR	220	0.724584	21.141
BERNOULLI	Urban100	img_056_SRF_2_HR	230	0.652384	19.8224
BERNOULLI	Urban100	img_056_SRF_2_HR	240	0.541239	18.2562
BERNOULLI	Urban100	img_053_SRF_2_HR	150	0.920461	24.7759
BERNOULLI	Urban100	img_053_SRF_2_HR	160	0.909252	24.1599
BERNOULLI	Urban100	img_053_SRF_2_HR	170	0.893751	23.4136
BERNOULLI	Urban100	img_053_SRF_2_HR	180	0.875283	22.7412
BERNOULLI	Urban100	img_053_SRF_2_HR	190	0.852145	21.9891
BERNOULLI	Urban100	img_053_SRF_2_HR	200	0.818912	21.0167
BERNOULLI	Urban100	img_053_SRF_2_HR	210	0.784824	20.1188
BERNOULLI	Urban100	img_053_SRF_2_HR	220	0.730416	19.1717
BERNOULLI	Urban100	img_053_SRF_2_HR	230	0.66707	18.0897
BERNOULLI	Urban100	img_053_SRF_2_HR	240	0.5497	16.5208
BERNOULLI	Urban100	img_027_SRF_2_HR	150	0.942296	32.3217
BERNOULLI	Urban100	img_027_SRF_2_HR	160	0.934578	31.7019
BERNOULLI	Urban100	img_027_SRF_2_HR	170	0.926047	31.1387
BERNOULLI	Urban100	img_027_SRF_2_HR	180	0.914091	30.4346
BERNOULLI	Urban100	img_027_SRF_2_HR	190	0.900164	29.7
BERNOULLI	Urban100	img_027_SRF_2_HR	200	0.880946	28.7719
BERNOULLI	Urban100	img_027_SRF_2_HR	210	0.858994	28.1058
BERNOULLI	Urban100	img_027_SRF_2_HR	220	0.826891	27.1324
BERNOULLI	Urban100	img_027_SRF_2_HR	230	0.776762	25.7629
BERNOULLI	Urban100	img_027_SRF_2_HR	240	0.698828	24.1361
BERNOULLI	Urban100	img_100_SRF_2_HR	150	0.906069	28.2247
BERNOULLI	Urban100	img_100_SRF_2_HR	160	0.896054	27.5556
BERNOULLI	Urban100	img_100_SRF_2_HR	170	0.883172	26.6991
BERNOULLI	Urban100	img_100_SRF_2_HR	180	0.869493	25.8947
BERNOULLI	Urban100	img_100_SRF_2_HR	190	0.856422	25.1758
BERNOULLI	Urban100	img_100_SRF_2_HR	200	0.831061	24.1194
BERNOULLI	Urban100	img_100_SRF_2_HR	210	0.80245	22.9319
BERNOULLI	Urban100	img_100_SRF_2_HR	220	0.766989	21.6139
BERNOULLI	Urban100	img_100_SRF_2_HR	230	0.70637	19.863
BERNOULLI	Urban100	img_100_SRF_2_HR	240	0.616	17.7723
BERNOULLI	Urban100	img_063_SRF_2_HR	150	0.892442	23.0228
BERNOULLI	Urban100	img_063_SRF_2_HR	160	0.876106	22.3202
BERNOULLI	Urban100	img_063_SRF_2_HR	170	0.855682	21.5527
BERNOULLI	Urban100	img_063_SRF_2_HR	180	0.836138	20.906
BERNOULLI	Urban100	img_063_SRF_2_HR	190	0.809077	20.0503
BERNOULLI	Urban100	img_063_SRF_2_HR	200	0.771258	19.0532
BERNOULLI	Urban100	img_063_SRF_2_HR	210	0.729985	18.2497
BERNOULLI	Urban100	img_063_SRF_2_HR	220	0.674607	17.3131
BERNOULLI	Urban100	img_063_SRF_2_HR	230	0.603898	16.1716
BERNOULLI	Urban100	img_063_SRF_2_HR	240	0.499373	15.0021
BERNOULLI	Urban100	img_036_SRF_2_HR	150	0.949351	29.9853
BERNOULLI	Urban100	img_036_SRF_2_HR	160	0.941987	29.2639
BERNOULLI	Urban100	img_036_SRF_2_HR	170	0.932854	28.5642
BERNOULLI	Urban100	img_036_SRF_2_HR	180	0.918895	27.613
BERNOULLI	Urban100	img_036_SRF_2_HR	190	0.905841	26.8771
BERNOULLI	Urban100	img_036_SRF_2_HR	200	0.882986	25.6583
BERNOULLI	Urban100	img_036_SRF_2_HR	210	0.857853	24.7388
BERNOULLI	Urban100	img_036_SRF_2_HR	220	0.817708	23.4288
BERNOULLI	Urban100	img_036_SRF_2_HR	230	0.752299	21.8328
BERNOULLI	Urban100	img_036_SRF_2_HR	240	0.658445	20.0522
BERNOULLI	Urban100	img_079_SRF_2_HR	150	0.919125	28.5488
BERNOULLI	Urban100	img_079_SRF_2_HR	160	0.905994	27.8198
BERNOULLI	Urban100	img_079_SRF_2_HR	170	0.892277	27.3304
BERNOULLI	Urban100	img_079_SRF_2_HR	180	0.874645	26.5944
BERNOULLI	Urban100	img_079_SRF_2_HR	190	0.854853	25.9387
BERNOULLI	Urban100	img_079_SRF_2_HR	200	0.829934	25.2886
BERNOULLI	Urban100	img_079_SRF_2_HR	210	0.797747	24.4469
BERNOULLI	Urban100	img_079_SRF_2_HR	220	0.753643	23.4676
BERNOULLI	Urban100	img_079_SRF_2_HR	230	0.69788	22.4628
BERNOULLI	Urban100	img_079_SRF_2_HR	240	0.59598	20.9431
BERNOULLI	Urban100	img_086_SRF_2_HR	150	0.950854	32.1755
BERNOULLI	Urban100	img_086_SRF_2_HR	160	0.944315	31.4127
BERNOULLI	Urban100	img_086_SRF_2_HR	170	0.936295	30.7947
BERNOULLI	Urban100	img_086_SRF_2_HR	180	0.926891	30.0212
BERNOULLI	Urban100	img_086_SRF_2_HR	190	0.916575	29.4517
BERNOULLI	Urban100	img_086_SRF_2_HR	200	0.902871	28.4013
BERNOULLI	Urban100	img_086_SRF_2_HR	210	0.884298	27.5152
BERNOULLI	Urban100	img_086_SRF_2_HR	220	0.86079	26.3058
BERNOULLI	Urban100	img_086_SRF_2_HR	230	0.832809	25.195
BERNOULLI	Urban100	img_086_SRF_2_HR	240	0.778997	23.3665
BERNOULLI	Urban100	img_065_SRF_2_HR	150	0.928469	29.2225
BERNOULLI	Urban100	img_065_SRF_2_HR	160	0.91753	28.6804
BERNOULLI	Urban100	img_065_SRF_2_HR	170	0.903282	27.9375
BERNOULLI	Urban100	img_065_SRF_2_HR	180	0.88612	27.194
BERNOULLI	Urban100	img_065_SRF_2_HR	190	0.862658	26.3687
BERNOULLI	Urban100	img_065_SRF_2_HR	200	0.834027	25.587
BERNOULLI	Urban100	img_065_SRF_2_HR	210	0.798422	24.7124
BERNOULLI	Urban100	img_065_SRF_2_HR	220	0.743289	23.6138
BERNOULLI	Urban100	img_065_SRF_2_HR	230	0.658722	22.3056
BERNOULLI	Urban100	img_065_SRF_2_HR	240	0.526883	20.6428
BERNOULLI	Urban100	img_034_SRF_2_HR	150	0.855426	25.9704
BERNOULLI	Urban100	img_034_SRF_2_HR	160	0.836183	25.3021
BERNOULLI	Urban100	img_034_SRF_2_HR	170	0.818302	24.6888
BERNOULLI	Urban100	img_034_SRF_2_HR	180	0.792934	23.9067
BERNOULLI	Urban100	img_034_SRF_2_HR	190	0.767104	23.2973
BERNOULLI	Urban100	img_034_SRF_2_HR	200	0.737275	22.7992
BERNOULLI	Urban100	img_034_SRF_2_HR	210	0.699271	21.9138
BERNOULLI	Urban100	img_034_SRF_2_HR	220	0.657755	21.1262
BERNOULLI	Urban100	img_034_SRF_2_HR	230	0.586729	19.9852
BERNOULLI	Urban100	img_034_SRF_2_HR	240	0.489659	18.406
BERNOULLI	Urban100	img_099_SRF_2_HR	150	0.756216	14.6196
BERNOULLI	Urban100	img_099_SRF_2_HR	160	0.73835	14.5653
BERNOULLI	Urban100	img_099_SRF_2_HR	170	0.721771	14.5251
BERNOULLI	Urban100	img_099_SRF_2_HR	180	0.698118	14.3649
BERNOULLI	Urban100	img_099_SRF_2_HR	190	0.66728	14.2688
BERNOULLI	Urban100	img_099_SRF_2_HR	200	0.638937	14.2367
BERNOULLI	Urban100	img_099_SRF_2_HR	210	0.600537	13.9797
BERNOULLI	Urban100	img_099_SRF_2_HR	220	0.549488	13.7601
BERNOULLI	Urban100	img_099_SRF_2_HR	230	0.483734	13.553
BERNOULLI	Urban100	img_099_SRF_2_HR	240	0.395675	13.2718
BERNOULLI	Urban100	img_032_SRF_2_HR	150	0.908192	30.2249
BERNOULLI	Urban100	img_032_SRF_2_HR	160	0.897888	29.7048
BERNOULLI	Urban100	img_032_SRF_2_HR	170	0.882279	28.9177
BERNOULLI	Urban100	img_032_SRF_2_HR	180	0.866099	28.3554
BERNOULLI	Urban100	img_032_SRF_2_HR	190	0.851398	27.7984
BERNOULLI	Urban100	img_032_SRF_2_HR	200	0.832156	27.0998
BERNOULLI	Urban100	img_032_SRF_2_HR	210	0.805335	26.4078
BERNOULLI	Urban100	img_032_SRF_2_HR	220	0.769285	25.4401
BERNOULLI	Urban100	img_032_SRF_2_HR	230	0.730372	24.6339
BERNOULLI	Urban100	img_032_SRF_2_HR	240	0.674567	23.2478
BERNOULLI	Urban100	img_082_SRF_2_HR	150	0.962844	31.0648
BERNOULLI	Urban100	img_082_SRF_2_HR	160	0.957238	30.3662
BERNOULLI	Urban100	img_082_SRF_2_HR	170	0.951761	29.6425
BERNOULLI	Urban100	img_082_SRF_2_HR	180	0.945417	28.9054
BERNOULLI	Urban100	img_082_SRF_2_HR	190	0.933874	27.9313
BERNOULLI	Urban100	img_082_SRF_2_HR	200	0.920775	26.7628
BERNOULLI	Urban100	img_082_SRF_2_HR	210	0.905689	25.826
BERNOULLI	Urban100	img_082_SRF_2_HR	220	0.882837	24.6382
BERNOULLI	Urban100	img_082_SRF_2_HR	230	0.84525	23.1237
BERNOULLI	Urban100	img_082_SRF_2_HR	240	0.776246	21.0163
BERNOULLI	Urban100	img_067_SRF_2_HR	150	0.9059	21.0461
BERNOULLI	Urban100	img_067_SRF_2_HR	160	0.894432	20.4679
BERNOULLI	Urban100	img_067_SRF_2_HR	170	0.881551	19.9899
BERNOULLI	Urban100	img_067_SRF_2_HR	180	0.863285	19.2616
BERNOULLI	Urban100	img_067_SRF_2_HR	190	0.84197	18.6012
BERNOULLI	Urban100	img_067_SRF_2_HR	200	0.810081	17.6314
BERNOULLI	Urban100	img_067_SRF_2_HR	210	0.774742	16.7478
BERNOULLI	Urban100	img_067_SRF_2_HR	220	0.72159	15.7749
BERNOULLI	Urban100	img_067_SRF_2_HR	230	0.645496	14.5619
BERNOULLI	Urban100	img_067_SRF_2_HR	240	0.539816	13.2135
BERNOULLI	Urban100	img_028_SRF_2_HR	150	0.956501	32.6065
BERNOULLI	Urban100	img_028_SRF_2_HR	160	0.951961	31.8046
BERNOULLI	Urban100	img_028_SRF_2_HR	170	0.945374	31.6444
BERNOULLI	Urban100	img_028_SRF_2_HR	180	0.934142	30.385
BERNOULLI	Urban100	img_028_SRF_2_HR	190	0.92205	29.6279
BERNOULLI	Urban100	img_028_SRF_2_HR	200	0.911933	29.3161
BERNOULLI	Urban100	img_028_SRF_2_HR	210	0.890749	28.2688
BERNOULLI	Urban100	img_028_SRF_2_HR	220	0.860415	27.1852
BERNOULLI	Urban100	img_028_SRF_2_HR	230	0.82509	26.0152
BERNOULLI	Urban100	img_028_SRF_2_HR	240	0.75966	24.5895
BERNOULLI	Urban100	img_026_SRF_2_HR	150	0.934261	32.5265
BERNOULLI	Urban100	img_026_SRF_2_HR	160	0.926181	32.1255
BERNOULLI	Urban100	img_026_SRF_2_HR	170	0.91661	31.4379
BERNOULLI	Urban100	img_026_SRF_2_HR	180	0.90002	30.3541
BERNOULLI	Urban100	img_026_SRF_2_HR	190	0.885174	29.5833
BERNOULLI	Urban100	img_026_SRF_2_HR	200	0.866605	28.7549
BERNOULLI	Urban100	img_026_SRF_2_HR	210	0.840707	27.6992
BERNOULLI	Urban100	img_026_SRF_2_HR	220	0.80508	26.3878
BERNOULLI	Urban100	img_026_SRF_2_HR	230	0.769976	25.6356
BERNOULLI	Urban100	img_026_SRF_2_HR	240	0.708601	24.0094
BERNOULLI	Urban100	img_031_SRF_2_HR	150	0.83412	24.658
BERNOULLI	Urban100	img_031_SRF_2_HR	160	0.821579	24.1077
BERNOULLI	Urban100	img_031_SRF_2_HR	170	0.801353	23.6103
BERNOULLI	Urban100	img_031_SRF_2_HR	180	0.783904	23.1633
BERNOULLI	Urban100	img_031_SRF_2_HR	190	0.761804	22.0447
BERNOULLI	Urban100	img_031_SRF_2_HR	200	0.731932	21.7599
BERNOULLI	Urban100	img_031_SRF_2_HR	210	0.698676	21.5876
BERNOULLI	Urban100	img_031_SRF_2_HR	220	0.653838	20.8216
BERNOULLI	Urban100	img_031_SRF_2_HR	230	0.587063	19.6672
BERNOULLI	Urban100	img_031_SRF_2_HR	240	0.507724	18.7646
BERNOULLI	Urban100	img_041_SRF_2_HR	150	0.930667	24.0431
BERNOULLI	Urban100	img_041_SRF_2_HR	160	0.918385	23.3002
BERNOULLI	Urban100	img_041_SRF_2_HR	170	0.906015	22.6446
BERNOULLI	Urban100	img_041_SRF_2_HR	180	0.886606	21.8027
BERNOULLI	Urban100	img_041_SRF_2_HR	190	0.866646	21.0348
BERNOULLI	Urban100	img_041_SRF_2_HR	200	0.838962	20.1334
BERNOULLI	Urban100	img_041_SRF_2_HR	210	0.797845	19.1561
BERNOULLI	Urban100	img_041_SRF_2_HR	220	0.746741	17.998
BERNOULLI	Urban100	img_041_SRF_2_HR	230	0.673999	16.8566
BERNOULLI	Urban100	img_041_SRF_2_HR	240	0.549353	15.1685
BERNOULLI	Urban100	img_030_SRF_2_HR	150	0.917249	25.3731
BERNOULLI	Urban100	img_030_SRF_2_HR	160	0.905252	24.8242
BERNOULLI	Urban100	img_030_SRF_2_HR	170	0.889856	24.2595
BERNOULLI	Urban100	img_030_SRF_2_HR	180	0.870445	23.4654
BERNOULLI	Urban100	img_030_SRF_2_HR	190	0.844709	22.6851
BERNOULLI	Urban100	img_030_SRF_2_HR	200	0.814596	21.8324
BERNOULLI	Urban100	img_030_SRF_2_HR	210	0.772884	20.9798
BERNOULLI	Urban100	img_030_SRF_2_HR	220	0.723388	20.0016
BERNOULLI	Urban100	img_030_SRF_2_HR	230	0.636847	18.682
BERNOULLI	Urban100	img_030_SRF_2_HR	240	0.526795	17.2895
BERNOULLI	Urban100	img_017_SRF_2_HR	150	0.93662	27.6116
BERNOULLI	Urban100	img_017_SRF_2_HR	160	0.925901	26.925
BERNOULLI	Urban100	img_017_SRF_2_HR	170	0.915503	26.3429
BERNOULLI	Urban100	img_017_SRF_2_HR	180	0.899343	25.564
BERNOULLI	Urban100	img_017_SRF_2_HR	190	0.882589	24.8369
BERNOULLI	Urban100	img_017_SRF_2_HR	200	0.860604	24.1031
BERNOULLI	Urban100	img_017_SRF_2_HR	210	0.827832	23.1526
BERNOULLI	Urban100	img_017_SRF_2_HR	220	0.796663	22.3173
BERNOULLI	Urban100	img_017_SRF_2_HR	230	0.743562	21.3167
BERNOULLI	Urban100	img_017_SRF_2_HR	240	0.662108	19.8575
BERNOULLI	Urban100	img_037_SRF_2_HR	150	0.91121	26.4084
BERNOULLI	Urban100	img_037_SRF_2_HR	160	0.89785	25.8328
BERNOULLI	Urban100	img_037_SRF_2_HR	170	0.88184	25.1126
BERNOULLI	Urban100	img_037_SRF_2_HR	180	0.864228	24.3595
BERNOULLI	Urban100	img_037_SRF_2_HR	190	0.839928	23.6961
BERNOULLI	Urban100	img_037_SRF_2_HR	200	0.808853	22.7623
BERNOULLI	Urban100	img_037_SRF_2_HR	210	0.766798	21.8236
BERNOULLI	Urban100	img_037_SRF_2_HR	220	0.723032	21.057
BERNOULLI	Urban100	img_037_SRF_2_HR	230	0.659097	19.9034
BERNOULLI	Urban100	img_037_SRF_2_HR	240	0.55864	18.5099
BERNOULLI	Urban100	img_059_SRF_2_HR	150	0.893101	26.0225
BERNOULLI	Urban100	img_059_SRF_2_HR	160	0.88029	25.5484
BERNOULLI	Urban100	img_059_SRF_2_HR	170	0.864429	25.0285
BERNOULLI	Urban100	img_059_SRF_2_HR	180	0.848265	24.5248
BERNOULLI	Urban100	img_059_SRF_2_HR	190	0.829433	23.9751
BERNOULLI	Urban100	img_059_SRF_2_HR	200	0.803766	23.3776
BERNOULLI	Urban100	img_059_SRF_2_HR	210	0.777551	22.9235
BERNOULLI	Urban100	img_059_SRF_2_HR	220	0.748708	22.3193
BERNOULLI	Urban100	img_059_SRF_2_HR	230	0.709181	21.5439
BERNOULLI	Urban100	img_059_SRF_2_HR	240	0.657552	20.7832
BERNOULLI	Urban100	img_039_SRF_2_HR	150	0.883534	25.8169
BERNOULLI	Urban100	img_039_SRF_2_HR	160	0.86864	25.2448
BERNOULLI	Urban100	img_039_SRF_2_HR	170	0.852214	24.8092
BERNOULLI	Urban100	img_039_SRF_2_HR	180	0.830764	23.9887
BERNOULLI	Urban100	img_039_SRF_2_HR	190	0.807286	23.4153
BERNOULLI	Urban100	img_039_SRF_2_HR	200	0.778199	22.6907
BERNOULLI	Urban100	img_039_SRF_2_HR	210	0.74239	21.9242
BERNOULLI	Urban100	img_039_SRF_2_HR	220	0.69908	21.0284
BERNOULLI	Urban100	img_039_SRF_2_HR	230	0.636451	19.916
BERNOULLI	Urban100	img_039_SRF_2_HR	240	0.555236	18.7288
BERNOULLI	Urban100	img_014_SRF_2_HR	150	0.900132	27.2569
BERNOULLI	Urban100	img_014_SRF_2_HR	160	0.887053	26.7245
BERNOULLI	Urban100	img_014_SRF_2_HR	170	0.870762	26.1359
BERNOULLI	Urban100	img_014_SRF_2_HR	180	0.852713	25.54
BERNOULLI	Urban100	img_014_SRF_2_HR	190	0.831002	25.0424
BERNOULLI	Urban100	img_014_SRF_2_HR	200	0.806062	24.4159
BERNOULLI	Urban100	img_014_SRF_2_HR	210	0.776141	23.7828
BERNOULLI	Urban100	img_014_SRF_2_HR	220	0.736408	23.0188
BERNOULLI	Urban100	img_014_SRF_2_HR	230	0.681087	22.1399
BERNOULLI	Urban100	img_014_SRF_2_HR	240	0.600035	20.958
BERNOULLI	Urban100	img_004_SRF_2_HR	150	0.887766	22.5066
BERNOULLI	Urban100	img_004_SRF_2_HR	160	0.867293	21.8334
BERNOULLI	Urban100	img_004_SRF_2_HR	170	0.845721	21.2267
BERNOULLI	Urban100	img_004_SRF_2_HR	180	0.819434	20.4489
BERNOULLI	Urban100	img_004_SRF_2_HR	190	0.784396	19.7362
BERNOULLI	Urban100	img_004_SRF_2_HR	200	0.747501	19.0829
BERNOULLI	Urban100	img_004_SRF_2_HR	210	0.69831	18.4019
BERNOULLI	Urban100	img_004_SRF_2_HR	220	0.634882	17.5839
BERNOULLI	Urban100	img_004_SRF_2_HR	230	0.54719	16.7486
[truncated: 4,937 more rows]
