# Supplementary material for: MPDenoiseNet: Resource-Efficient Deep Learning Approach for Image Denoising
Source: Research Square preprint supplement (doi:10.21203/rs.3.rs-6641644/v1), 2025-05-20
Supplement: Supplementary file 9 [file ablation_no_unet.xlsx]

## Sheet: Sheet1
noise_type	dataset	im_index	noise_parameter	SSIM	PSNR
BERNOULLI	Kodak24	kodim12	150	0.907218	30.0361
BERNOULLI	Kodak24	kodim12	160	0.896278	29.6838
BERNOULLI	Kodak24	kodim12	170	0.885773	29.2806
BERNOULLI	Kodak24	kodim12	180	0.871589	28.905
BERNOULLI	Kodak24	kodim12	190	0.854121	28.2855
BERNOULLI	Kodak24	kodim12	200	0.836664	27.6725
BERNOULLI	Kodak24	kodim12	210	0.816662	27.1624
BERNOULLI	Kodak24	kodim12	220	0.788096	26.3045
BERNOULLI	Kodak24	kodim12	230	0.755797	25.7259
BERNOULLI	Kodak24	kodim12	240	0.715733	24.629
BERNOULLI	Kodak24	kodim09	150	0.93355	31.799
BERNOULLI	Kodak24	kodim09	160	0.928109	31.266
BERNOULLI	Kodak24	kodim09	170	0.919751	30.8029
BERNOULLI	Kodak24	kodim09	180	0.910421	30.3138
BERNOULLI	Kodak24	kodim09	190	0.899949	29.7371
BERNOULLI	Kodak24	kodim09	200	0.888166	29.1572
BERNOULLI	Kodak24	kodim09	210	0.870309	28.3014
BERNOULLI	Kodak24	kodim09	220	0.850965	27.5188
BERNOULLI	Kodak24	kodim09	230	0.818043	26.3759
BERNOULLI	Kodak24	kodim09	240	0.768563	24.9213
BERNOULLI	Kodak24	kodim20	150	0.902092	29.9911
BERNOULLI	Kodak24	kodim20	160	0.89703	29.5847
BERNOULLI	Kodak24	kodim20	170	0.887817	29.1314
BERNOULLI	Kodak24	kodim20	180	0.877561	28.6476
BERNOULLI	Kodak24	kodim20	190	0.867698	27.9789
BERNOULLI	Kodak24	kodim20	200	0.855913	27.417
BERNOULLI	Kodak24	kodim20	210	0.840559	26.8916
BERNOULLI	Kodak24	kodim20	220	0.820867	26.1033
BERNOULLI	Kodak24	kodim20	230	0.800783	25.2367
BERNOULLI	Kodak24	kodim20	240	0.765054	24.1691
BERNOULLI	Kodak24	kodim07	150	0.966269	32.3853
BERNOULLI	Kodak24	kodim07	160	0.962175	32.0009
BERNOULLI	Kodak24	kodim07	170	0.9565	31.518
BERNOULLI	Kodak24	kodim07	180	0.949784	31.0085
BERNOULLI	Kodak24	kodim07	190	0.941521	30.3604
BERNOULLI	Kodak24	kodim07	200	0.930613	29.7316
BERNOULLI	Kodak24	kodim07	210	0.917457	29.125
BERNOULLI	Kodak24	kodim07	220	0.89628	28.0283
BERNOULLI	Kodak24	kodim07	230	0.863116	26.7416
BERNOULLI	Kodak24	kodim07	240	0.799612	24.9929
BERNOULLI	Kodak24	kodim02	150	0.914008	32.0553
BERNOULLI	Kodak24	kodim02	160	0.903627	31.786
BERNOULLI	Kodak24	kodim02	170	0.890996	31.4482
BERNOULLI	Kodak24	kodim02	180	0.878743	31.1432
BERNOULLI	Kodak24	kodim02	190	0.862871	30.8239
BERNOULLI	Kodak24	kodim02	200	0.843643	30.442
BERNOULLI	Kodak24	kodim02	210	0.823298	29.9115
BERNOULLI	Kodak24	kodim02	220	0.795386	29.2657
BERNOULLI	Kodak24	kodim02	230	0.764624	28.5799
BERNOULLI	Kodak24	kodim02	240	0.724669	27.9126
BERNOULLI	Kodak24	kodim01	150	0.873941	27.4952
BERNOULLI	Kodak24	kodim01	160	0.856287	27.0169
BERNOULLI	Kodak24	kodim01	170	0.836607	26.4608
BERNOULLI	Kodak24	kodim01	180	0.813655	25.9949
BERNOULLI	Kodak24	kodim01	190	0.787529	25.4171
BERNOULLI	Kodak24	kodim01	200	0.754974	24.8383
BERNOULLI	Kodak24	kodim01	210	0.716248	24.122
BERNOULLI	Kodak24	kodim01	220	0.666165	23.2784
BERNOULLI	Kodak24	kodim01	230	0.598057	22.3254
BERNOULLI	Kodak24	kodim01	240	0.49938	21.1239
BERNOULLI	Kodak24	kodim11	150	0.9107	29.656
BERNOULLI	Kodak24	kodim11	160	0.898	29.1512
BERNOULLI	Kodak24	kodim11	170	0.884122	28.699
BERNOULLI	Kodak24	kodim11	180	0.868149	28.1818
BERNOULLI	Kodak24	kodim11	190	0.848228	27.5821
BERNOULLI	Kodak24	kodim11	200	0.823901	26.988
BERNOULLI	Kodak24	kodim11	210	0.793348	26.3005
BERNOULLI	Kodak24	kodim11	220	0.755457	25.5409
BERNOULLI	Kodak24	kodim11	230	0.706246	24.7526
BERNOULLI	Kodak24	kodim11	240	0.642674	23.6525
BERNOULLI	Kodak24	kodim19	150	0.910119	31.5502
BERNOULLI	Kodak24	kodim19	160	0.899089	30.8831
BERNOULLI	Kodak24	kodim19	170	0.886365	30.1386
BERNOULLI	Kodak24	kodim19	180	0.870933	29.3362
BERNOULLI	Kodak24	kodim19	190	0.853703	28.4199
BERNOULLI	Kodak24	kodim19	200	0.831539	27.5554
BERNOULLI	Kodak24	kodim19	210	0.806412	26.5366
BERNOULLI	Kodak24	kodim19	220	0.772613	25.3481
BERNOULLI	Kodak24	kodim19	230	0.726417	24.0131
BERNOULLI	Kodak24	kodim19	240	0.665135	22.6483
BERNOULLI	Kodak24	kodim05	150	0.926589	27.9488
BERNOULLI	Kodak24	kodim05	160	0.914897	27.3736
BERNOULLI	Kodak24	kodim05	170	0.898308	26.5912
BERNOULLI	Kodak24	kodim05	180	0.876898	25.8135
BERNOULLI	Kodak24	kodim05	190	0.850215	25.0051
BERNOULLI	Kodak24	kodim05	200	0.820689	24.2796
BERNOULLI	Kodak24	kodim05	210	0.781264	23.4196
BERNOULLI	Kodak24	kodim05	220	0.730945	22.4984
BERNOULLI	Kodak24	kodim05	230	0.658136	21.2922
BERNOULLI	Kodak24	kodim05	240	0.559083	20.0074
BERNOULLI	Kodak24	kodim04	150	0.923145	32.0106
BERNOULLI	Kodak24	kodim04	160	0.914332	31.6734
BERNOULLI	Kodak24	kodim04	170	0.903434	31.2468
BERNOULLI	Kodak24	kodim04	180	0.890628	30.8401
BERNOULLI	Kodak24	kodim04	190	0.877769	30.4717
BERNOULLI	Kodak24	kodim04	200	0.860647	29.9124
BERNOULLI	Kodak24	kodim04	210	0.841872	29.3661
BERNOULLI	Kodak24	kodim04	220	0.815663	28.7136
BERNOULLI	Kodak24	kodim04	230	0.782737	27.8864
BERNOULLI	Kodak24	kodim04	240	0.738877	26.7667
BERNOULLI	Kodak24	kodim15	150	0.915192	31.0607
BERNOULLI	Kodak24	kodim15	160	0.907205	30.6898
BERNOULLI	Kodak24	kodim15	170	0.898303	30.4024
BERNOULLI	Kodak24	kodim15	180	0.887494	30.0626
BERNOULLI	Kodak24	kodim15	190	0.875499	29.6154
BERNOULLI	Kodak24	kodim15	200	0.859761	29.1521
BERNOULLI	Kodak24	kodim15	210	0.843716	28.5891
BERNOULLI	Kodak24	kodim15	220	0.823779	27.996
BERNOULLI	Kodak24	kodim15	230	0.795484	26.8189
BERNOULLI	Kodak24	kodim15	240	0.759341	25.5674
BERNOULLI	Kodak24	kodim21	150	0.916592	28.7572
BERNOULLI	Kodak24	kodim21	160	0.905588	28.2576
BERNOULLI	Kodak24	kodim21	170	0.895294	27.7896
BERNOULLI	Kodak24	kodim21	180	0.881536	27.253
BERNOULLI	Kodak24	kodim21	190	0.862919	26.5535
BERNOULLI	Kodak24	kodim21	200	0.845614	26.0064
BERNOULLI	Kodak24	kodim21	210	0.823797	25.3349
BERNOULLI	Kodak24	kodim21	220	0.793706	24.6378
BERNOULLI	Kodak24	kodim21	230	0.752844	23.7311
BERNOULLI	Kodak24	kodim21	240	0.700481	22.7585
BERNOULLI	Kodak24	kodim10	150	0.940905	31.9769
BERNOULLI	Kodak24	kodim10	160	0.934083	31.4965
BERNOULLI	Kodak24	kodim10	170	0.925162	31.0781
BERNOULLI	Kodak24	kodim10	180	0.916505	30.3749
BERNOULLI	Kodak24	kodim10	190	0.904971	29.8485
BERNOULLI	Kodak24	kodim10	200	0.889753	29.0528
BERNOULLI	Kodak24	kodim10	210	0.868924	28.1198
BERNOULLI	Kodak24	kodim10	220	0.843825	27.2259
BERNOULLI	Kodak24	kodim10	230	0.809316	26.3501
BERNOULLI	Kodak24	kodim10	240	0.75923	25.1754
BERNOULLI	Kodak24	kodim08	150	0.902987	26.3337
BERNOULLI	Kodak24	kodim08	160	0.88924	25.7642
BERNOULLI	Kodak24	kodim08	170	0.87154	25.1135
BERNOULLI	Kodak24	kodim08	180	0.851976	24.3302
BERNOULLI	Kodak24	kodim08	190	0.823938	23.4934
BERNOULLI	Kodak24	kodim08	200	0.795172	22.747
BERNOULLI	Kodak24	kodim08	210	0.761331	21.9043
BERNOULLI	Kodak24	kodim08	220	0.708302	20.8501
BERNOULLI	Kodak24	kodim08	230	0.637338	19.6086
BERNOULLI	Kodak24	kodim08	240	0.533458	18.0867
BERNOULLI	Kodak24	kodim03	150	0.951217	32.3993
BERNOULLI	Kodak24	kodim03	160	0.944223	32.1369
BERNOULLI	Kodak24	kodim03	170	0.937029	31.8605
BERNOULLI	Kodak24	kodim03	180	0.927943	31.5994
BERNOULLI	Kodak24	kodim03	190	0.918013	31.1564
BERNOULLI	Kodak24	kodim03	200	0.905431	30.7121
BERNOULLI	Kodak24	kodim03	210	0.89131	30.3274
BERNOULLI	Kodak24	kodim03	220	0.871762	29.5544
BERNOULLI	Kodak24	kodim03	230	0.846735	28.7928
BERNOULLI	Kodak24	kodim03	240	0.809618	27.7243
BERNOULLI	Kodak24	kodim24	150	0.903406	27.2723
BERNOULLI	Kodak24	kodim24	160	0.889183	26.7461
BERNOULLI	Kodak24	kodim24	170	0.872425	26.1971
BERNOULLI	Kodak24	kodim24	180	0.85467	25.5671
BERNOULLI	Kodak24	kodim24	190	0.833974	25.0608
BERNOULLI	Kodak24	kodim24	200	0.807599	24.447
BERNOULLI	Kodak24	kodim24	210	0.774239	23.7315
BERNOULLI	Kodak24	kodim24	220	0.733925	23.018
BERNOULLI	Kodak24	kodim24	230	0.681898	22.3119
BERNOULLI	Kodak24	kodim24	240	0.608078	21.3953
BERNOULLI	Kodak24	kodim17	150	0.943753	33.4253
BERNOULLI	Kodak24	kodim17	160	0.937463	32.864
BERNOULLI	Kodak24	kodim17	170	0.930552	32.1903
BERNOULLI	Kodak24	kodim17	180	0.920126	31.3908
BERNOULLI	Kodak24	kodim17	190	0.909218	30.7969
BERNOULLI	Kodak24	kodim17	200	0.893968	29.9472
BERNOULLI	Kodak24	kodim17	210	0.874387	29.1072
BERNOULLI	Kodak24	kodim17	220	0.849936	28.2102
BERNOULLI	Kodak24	kodim17	230	0.814426	27.0789
BERNOULLI	Kodak24	kodim17	240	0.755748	25.731
BERNOULLI	Kodak24	kodim23	150	0.955536	32.4521
BERNOULLI	Kodak24	kodim23	160	0.952059	32.1983
BERNOULLI	Kodak24	kodim23	170	0.94738	31.7025
BERNOULLI	Kodak24	kodim23	180	0.939737	31.3854
BERNOULLI	Kodak24	kodim23	190	0.932755	30.8507
BERNOULLI	Kodak24	kodim23	200	0.926738	30.3794
BERNOULLI	Kodak24	kodim23	210	0.914601	29.7256
BERNOULLI	Kodak24	kodim23	220	0.902427	29.0303
BERNOULLI	Kodak24	kodim23	230	0.885135	28.0362
BERNOULLI	Kodak24	kodim23	240	0.856197	26.8898
BERNOULLI	Kodak24	kodim06	150	0.896614	28.1701
BERNOULLI	Kodak24	kodim06	160	0.881494	27.6543
BERNOULLI	Kodak24	kodim06	170	0.864622	27.1941
BERNOULLI	Kodak24	kodim06	180	0.844223	26.7259
BERNOULLI	Kodak24	kodim06	190	0.820139	26.1461
BERNOULLI	Kodak24	kodim06	200	0.792588	25.4721
BERNOULLI	Kodak24	kodim06	210	0.75709	24.9307
BERNOULLI	Kodak24	kodim06	220	0.712126	24.1498
BERNOULLI	Kodak24	kodim06	230	0.653541	23.4041
BERNOULLI	Kodak24	kodim06	240	0.573953	22.2689
BERNOULLI	Kodak24	kodim16	150	0.920202	30.5212
BERNOULLI	Kodak24	kodim16	160	0.911169	30.2356
BERNOULLI	Kodak24	kodim16	170	0.899285	29.936
BERNOULLI	Kodak24	kodim16	180	0.884743	29.5188
BERNOULLI	Kodak24	kodim16	190	0.8673	29.2376
BERNOULLI	Kodak24	kodim16	200	0.848194	28.8295
BERNOULLI	Kodak24	kodim16	210	0.822701	28.3839
BERNOULLI	Kodak24	kodim16	220	0.7903	27.8142
BERNOULLI	Kodak24	kodim16	230	0.743277	27.2003
BERNOULLI	Kodak24	kodim16	240	0.683158	26.3133
BERNOULLI	Kodak24	kodim22	150	0.902471	30.4195
BERNOULLI	Kodak24	kodim22	160	0.889532	29.9546
BERNOULLI	Kodak24	kodim22	170	0.873891	29.5045
BERNOULLI	Kodak24	kodim22	180	0.855668	28.885
BERNOULLI	Kodak24	kodim22	190	0.8354	28.3759
BERNOULLI	Kodak24	kodim22	200	0.813144	27.9193
BERNOULLI	Kodak24	kodim22	210	0.787456	27.3506
BERNOULLI	Kodak24	kodim22	220	0.749113	26.5229
BERNOULLI	Kodak24	kodim22	230	0.706376	25.8276
BERNOULLI	Kodak24	kodim22	240	0.648761	24.9631
BERNOULLI	Kodak24	kodim13	150	0.820496	24.2426
BERNOULLI	Kodak24	kodim13	160	0.799314	23.7635
BERNOULLI	Kodak24	kodim13	170	0.76872	23.1664
BERNOULLI	Kodak24	kodim13	180	0.742023	22.7473
BERNOULLI	Kodak24	kodim13	190	0.703692	22.1389
BERNOULLI	Kodak24	kodim13	200	0.668055	21.6429
BERNOULLI	Kodak24	kodim13	210	0.621515	21.1235
BERNOULLI	Kodak24	kodim13	220	0.562834	20.5035
BERNOULLI	Kodak24	kodim13	230	0.496217	19.8275
BERNOULLI	Kodak24	kodim13	240	0.412197	19.0092
BERNOULLI	Kodak24	kodim18	150	0.899426	28.5724
BERNOULLI	Kodak24	kodim18	160	0.883315	27.9352
BERNOULLI	Kodak24	kodim18	170	0.869055	27.4782
BERNOULLI	Kodak24	kodim18	180	0.848837	26.8946
BERNOULLI	Kodak24	kodim18	190	0.825785	26.2626
BERNOULLI	Kodak24	kodim18	200	0.795518	25.5647
BERNOULLI	Kodak24	kodim18	210	0.763382	24.8879
BERNOULLI	Kodak24	kodim18	220	0.720415	24.1641
BERNOULLI	Kodak24	kodim18	230	0.664376	23.4303
BERNOULLI	Kodak24	kodim18	240	0.586307	22.3681
BERNOULLI	Kodak24	kodim14	150	0.903483	28.9516
BERNOULLI	Kodak24	kodim14	160	0.889724	28.5539
BERNOULLI	Kodak24	kodim14	170	0.875042	28.0615
BERNOULLI	Kodak24	kodim14	180	0.857104	27.63
BERNOULLI	Kodak24	kodim14	190	0.834876	27.1146
BERNOULLI	Kodak24	kodim14	200	0.808381	26.5193
BERNOULLI	Kodak24	kodim14	210	0.776749	25.8112
BERNOULLI	Kodak24	kodim14	220	0.732531	24.9424
BERNOULLI	Kodak24	kodim14	230	0.675911	24.0495
BERNOULLI	Kodak24	kodim14	240	0.596172	22.984
BERNOULLI	BSD68	66	150	0.916106	30.5105
BERNOULLI	BSD68	66	160	0.904873	29.9143
BERNOULLI	BSD68	66	170	0.892792	29.3539
BERNOULLI	BSD68	66	180	0.879645	28.744
BERNOULLI	BSD68	66	190	0.859889	28.0936
BERNOULLI	BSD68	66	200	0.84054	27.305
BERNOULLI	BSD68	66	210	0.814222	26.5726
BERNOULLI	BSD68	66	220	0.781875	25.721
BERNOULLI	BSD68	66	230	0.733694	24.79
BERNOULLI	BSD68	66	240	0.679239	23.3397
BERNOULLI	BSD68	57	150	0.750479	22.4329
BERNOULLI	BSD68	57	160	0.720757	21.9278
BERNOULLI	BSD68	57	170	0.691754	21.5376
BERNOULLI	BSD68	57	180	0.651487	21.1022
BERNOULLI	BSD68	57	190	0.611276	20.6272
BERNOULLI	BSD68	57	200	0.571962	20.2825
BERNOULLI	BSD68	57	210	0.519131	19.8054
BERNOULLI	BSD68	57	220	0.459919	19.2672
BERNOULLI	BSD68	57	230	0.391028	18.7178
BERNOULLI	BSD68	57	240	0.31171	18.0531
BERNOULLI	BSD68	26	150	0.880206	24.4321
BERNOULLI	BSD68	26	160	0.86665	24.0286
BERNOULLI	BSD68	26	170	0.845803	23.3054
BERNOULLI	BSD68	26	180	0.821715	22.6172
BERNOULLI	BSD68	26	190	0.791617	21.9641
BERNOULLI	BSD68	26	200	0.76471	21.4317
BERNOULLI	BSD68	26	210	0.718565	20.5841
BERNOULLI	BSD68	26	220	0.6719	19.8287
BERNOULLI	BSD68	26	230	0.607137	18.8524
BERNOULLI	BSD68	26	240	0.513523	17.8488
BERNOULLI	BSD68	21	150	0.878908	27.2466
BERNOULLI	BSD68	21	160	0.865867	26.7801
BERNOULLI	BSD68	21	170	0.840811	26.072
BERNOULLI	BSD68	21	180	0.823468	25.6121
BERNOULLI	BSD68	21	190	0.797586	24.9681
BERNOULLI	BSD68	21	200	0.774672	24.523
BERNOULLI	BSD68	21	210	0.733366	23.7546
BERNOULLI	BSD68	21	220	0.685599	22.9075
BERNOULLI	BSD68	21	230	0.629388	22.1936
BERNOULLI	BSD68	21	240	0.564721	21.2805
BERNOULLI	BSD68	50	150	0.892929	31.9694
BERNOULLI	BSD68	50	160	0.883194	31.7988
BERNOULLI	BSD68	50	170	0.871963	31.3755
BERNOULLI	BSD68	50	180	0.857475	30.7229
BERNOULLI	BSD68	50	190	0.848168	30.5447
BERNOULLI	BSD68	50	200	0.833338	30.0352
BERNOULLI	BSD68	50	210	0.817078	29.5174
BERNOULLI	BSD68	50	220	0.799333	29.0836
BERNOULLI	BSD68	50	230	0.775434	28.2433
BERNOULLI	BSD68	50	240	0.740134	27.2434
BERNOULLI	BSD68	12	150	0.871272	25.8855
BERNOULLI	BSD68	12	160	0.858252	25.4603
BERNOULLI	BSD68	12	170	0.841258	25.049
BERNOULLI	BSD68	12	180	0.818729	24.5492
BERNOULLI	BSD68	12	190	0.795572	24.0349
BERNOULLI	BSD68	12	200	0.770809	23.5325
BERNOULLI	BSD68	12	210	0.737935	23.0055
BERNOULLI	BSD68	12	220	0.698936	22.4713
BERNOULLI	BSD68	12	230	0.646756	21.7409
BERNOULLI	BSD68	12	240	0.584465	21.0921
BERNOULLI	BSD68	5	150	0.879306	29.2097
BERNOULLI	BSD68	5	160	0.866489	28.6819
BERNOULLI	BSD68	5	170	0.853966	28.1432
BERNOULLI	BSD68	5	180	0.838428	27.3013
BERNOULLI	BSD68	5	190	0.815656	26.5603
BERNOULLI	BSD68	5	200	0.794422	26.0674
BERNOULLI	BSD68	5	210	0.764686	25.1841
BERNOULLI	BSD68	5	220	0.732667	24.3752
BERNOULLI	BSD68	5	230	0.690956	23.2401
BERNOULLI	BSD68	5	240	0.620137	21.7408
BERNOULLI	BSD68	11	150	0.956046	33.6658
BERNOULLI	BSD68	11	160	0.947626	32.7259
BERNOULLI	BSD68	11	170	0.941453	32.3753
BERNOULLI	BSD68	11	180	0.9319	31.4928
BERNOULLI	BSD68	11	190	0.919591	30.9101
BERNOULLI	BSD68	11	200	0.904679	29.9448
BERNOULLI	BSD68	11	210	0.883679	29.2124
BERNOULLI	BSD68	11	220	0.856458	28.3494
BERNOULLI	BSD68	11	230	0.819044	27.4355
BERNOULLI	BSD68	11	240	0.74907	25.9512
BERNOULLI	BSD68	39	150	0.741345	28.5246
BERNOULLI	BSD68	39	160	0.716562	28.2069
BERNOULLI	BSD68	39	170	0.688956	27.8874
BERNOULLI	BSD68	39	180	0.660083	27.5162
BERNOULLI	BSD68	39	190	0.628692	27.1624
BERNOULLI	BSD68	39	200	0.588533	26.7323
BERNOULLI	BSD68	39	210	0.556434	26.4235
BERNOULLI	BSD68	39	220	0.520055	26.0641
BERNOULLI	BSD68	39	230	0.474598	25.5867
BERNOULLI	BSD68	39	240	0.426703	24.8988
BERNOULLI	BSD68	63	150	0.970434	37.2283
BERNOULLI	BSD68	63	160	0.968096	36.3601
BERNOULLI	BSD68	63	170	0.965978	35.7292
BERNOULLI	BSD68	63	180	0.962816	34.409
BERNOULLI	BSD68	63	190	0.95759	33.3744
BERNOULLI	BSD68	63	200	0.951809	32.1088
BERNOULLI	BSD68	63	210	0.944358	30.8626
BERNOULLI	BSD68	63	220	0.930016	28.8354
BERNOULLI	BSD68	63	230	0.903204	26.1744
BERNOULLI	BSD68	63	240	0.855764	22.891
BERNOULLI	BSD68	45	150	0.958978	31.2096
BERNOULLI	BSD68	45	160	0.952835	30.682
BERNOULLI	BSD68	45	170	0.946993	29.9725
BERNOULLI	BSD68	45	180	0.936582	28.9705
BERNOULLI	BSD68	45	190	0.926682	28.0868
BERNOULLI	BSD68	45	200	0.91415	27.2483
BERNOULLI	BSD68	45	210	0.895167	26.036
BERNOULLI	BSD68	45	220	0.868801	24.8472
BERNOULLI	BSD68	45	230	0.830139	23.6585
BERNOULLI	BSD68	45	240	0.757496	21.8067
BERNOULLI	BSD68	60	150	0.888166	32.0866
BERNOULLI	BSD68	60	160	0.875686	31.67
BERNOULLI	BSD68	60	170	0.86507	31.3519
BERNOULLI	BSD68	60	180	0.850109	30.7941
BERNOULLI	BSD68	60	190	0.83111	30.2325
BERNOULLI	BSD68	60	200	0.814155	29.8411
BERNOULLI	BSD68	60	210	0.794886	29.3028
BERNOULLI	BSD68	60	220	0.766799	28.4845
BERNOULLI	BSD68	60	230	0.737	27.6503
BERNOULLI	BSD68	60	240	0.694173	26.6327
BERNOULLI	BSD68	9	150	0.915604	29.4536
BERNOULLI	BSD68	9	160	0.908496	28.9592
BERNOULLI	BSD68	9	170	0.895658	28.5021
BERNOULLI	BSD68	9	180	0.883563	27.8443
BERNOULLI	BSD68	9	190	0.869851	27.405
BERNOULLI	BSD68	9	200	0.852391	26.6946
BERNOULLI	BSD68	9	210	0.826005	25.9497
BERNOULLI	BSD68	9	220	0.797112	25.1273
BERNOULLI	BSD68	9	230	0.767636	24.0542
BERNOULLI	BSD68	9	240	0.721967	23.2756
BERNOULLI	BSD68	18	150	0.927907	29.1892
BERNOULLI	BSD68	18	160	0.917903	28.5432
BERNOULLI	BSD68	18	170	0.902565	27.585
BERNOULLI	BSD68	18	180	0.89103	26.9884
BERNOULLI	BSD68	18	190	0.872242	26.1943
BERNOULLI	BSD68	18	200	0.845864	25.1826
BERNOULLI	BSD68	18	210	0.813319	24.1153
BERNOULLI	BSD68	18	220	0.771857	22.9509
BERNOULLI	BSD68	18	230	0.699391	21.5624
BERNOULLI	BSD68	18	240	0.60017	19.9479
BERNOULLI	BSD68	7	150	0.873377	23.8856
BERNOULLI	BSD68	7	160	0.855319	23.3124
BERNOULLI	BSD68	7	170	0.834162	22.667
BERNOULLI	BSD68	7	180	0.810461	22.0699
BERNOULLI	BSD68	7	190	0.778836	21.4362
BERNOULLI	BSD68	7	200	0.743087	20.6666
BERNOULLI	BSD68	7	210	0.700741	20.0379
BERNOULLI	BSD68	7	220	0.647224	19.2192
BERNOULLI	BSD68	7	230	0.57326	18.2698
BERNOULLI	BSD68	7	240	0.456654	17.0561
BERNOULLI	BSD68	59	150	0.896074	32.3138
BERNOULLI	BSD68	59	160	0.886517	31.9089
BERNOULLI	BSD68	59	170	0.872321	31.494
BERNOULLI	BSD68	59	180	0.857945	30.9506
BERNOULLI	BSD68	59	190	0.839354	30.562
BERNOULLI	BSD68	59	200	0.821964	30.1376
BERNOULLI	BSD68	59	210	0.803858	29.6527
BERNOULLI	BSD68	59	220	0.772776	29.028
BERNOULLI	BSD68	59	230	0.746978	28.4441
BERNOULLI	BSD68	59	240	0.705633	27.642
BERNOULLI	BSD68	0	150	0.98158	40.1909
BERNOULLI	BSD68	0	160	0.979927	39.2832
BERNOULLI	BSD68	0	170	0.978857	38.4915
BERNOULLI	BSD68	0	180	0.976907	37.9709
BERNOULLI	BSD68	0	190	0.975418	36.9305
BERNOULLI	BSD68	0	200	0.97345	36.7197
BERNOULLI	BSD68	0	210	0.969994	35.687
BERNOULLI	BSD68	0	220	0.966432	34.777
BERNOULLI	BSD68	0	230	0.959619	33.2381
BERNOULLI	BSD68	0	240	0.946678	31.3862
BERNOULLI	BSD68	30	150	0.945591	29.8529
BERNOULLI	BSD68	30	160	0.939356	29.3181
BERNOULLI	BSD68	30	170	0.93136	28.6879
BERNOULLI	BSD68	30	180	0.918123	28.0644
BERNOULLI	BSD68	30	190	0.909084	27.2944
BERNOULLI	BSD68	30	200	0.894172	26.541
BERNOULLI	BSD68	30	210	0.878369	25.7562
BERNOULLI	BSD68	30	220	0.850818	24.7841
BERNOULLI	BSD68	30	230	0.814472	23.6641
BERNOULLI	BSD68	30	240	0.757527	22.2229
BERNOULLI	BSD68	53	150	0.889121	27.1602
BERNOULLI	BSD68	53	160	0.882586	27.0185
BERNOULLI	BSD68	53	170	0.869582	26.5713
BERNOULLI	BSD68	53	180	0.860472	26.2972
BERNOULLI	BSD68	53	190	0.84207	25.7518
BERNOULLI	BSD68	53	200	0.830406	25.4869
BERNOULLI	BSD68	53	210	0.813402	25.0602
BERNOULLI	BSD68	53	220	0.792259	24.6801
BERNOULLI	BSD68	53	230	0.769641	24.4871
BERNOULLI	BSD68	53	240	0.729812	24.223
BERNOULLI	BSD68	49	150	0.880837	27.2291
BERNOULLI	BSD68	49	160	0.862053	26.6733
BERNOULLI	BSD68	49	170	0.842235	26.039
BERNOULLI	BSD68	49	180	0.822414	25.5742
BERNOULLI	BSD68	49	190	0.7946	24.9536
BERNOULLI	BSD68	49	200	0.753931	24.2105
BERNOULLI	BSD68	49	210	0.717991	23.5908
BERNOULLI	BSD68	49	220	0.668152	23.0081
BERNOULLI	BSD68	49	230	0.593563	22.1138
BERNOULLI	BSD68	49	240	0.490896	21.1881
BERNOULLI	BSD68	41	150	0.927149	31.7936
BERNOULLI	BSD68	41	160	0.914646	31.1204
BERNOULLI	BSD68	41	170	0.900309	30.4389
BERNOULLI	BSD68	41	180	0.884678	29.6984
BERNOULLI	BSD68	41	190	0.862938	29.0176
BERNOULLI	BSD68	41	200	0.833611	28.0801
BERNOULLI	BSD68	41	210	0.801006	27.2976
BERNOULLI	BSD68	41	220	0.756174	26.4392
BERNOULLI	BSD68	41	230	0.696766	25.3636
BERNOULLI	BSD68	41	240	0.609371	24.0669
BERNOULLI	BSD68	17	150	0.929801	31.6393
BERNOULLI	BSD68	17	160	0.920198	30.9953
BERNOULLI	BSD68	17	170	0.909917	30.4497
BERNOULLI	BSD68	17	180	0.895749	29.9551
BERNOULLI	BSD68	17	190	0.881546	29.3107
BERNOULLI	BSD68	17	200	0.862243	28.6668
BERNOULLI	BSD68	17	210	0.836162	27.7564
BERNOULLI	BSD68	17	220	0.803798	27.1055
BERNOULLI	BSD68	17	230	0.762885	26.1833
BERNOULLI	BSD68	17	240	0.69558	24.845
BERNOULLI	BSD68	48	150	0.858021	24.9707
BERNOULLI	BSD68	48	160	0.840776	24.4553
BERNOULLI	BSD68	48	170	0.817774	23.7257
BERNOULLI	BSD68	48	180	0.791403	23.2128
BERNOULLI	BSD68	48	190	0.76228	22.5181
BERNOULLI	BSD68	48	200	0.724341	21.8245
BERNOULLI	BSD68	48	210	0.682871	21.219
BERNOULLI	BSD68	48	220	0.625279	20.3167
BERNOULLI	BSD68	48	230	0.555456	19.5253
BERNOULLI	BSD68	48	240	0.464174	18.5945
BERNOULLI	BSD68	31	150	0.935594	33.0573
BERNOULLI	BSD68	31	160	0.926421	32.3075
BERNOULLI	BSD68	31	170	0.915887	31.688
BERNOULLI	BSD68	31	180	0.902282	30.9285
BERNOULLI	BSD68	31	190	0.88856	30.3542
BERNOULLI	BSD68	31	200	0.868786	29.4889
BERNOULLI	BSD68	31	210	0.845668	28.7665
BERNOULLI	BSD68	31	220	0.813154	27.6873
BERNOULLI	BSD68	31	230	0.769813	26.6034
BERNOULLI	BSD68	31	240	0.706362	25.3148
BERNOULLI	BSD68	27	150	0.891881	27.5671
BERNOULLI	BSD68	27	160	0.875268	26.829
BERNOULLI	BSD68	27	170	0.854145	26.1541
BERNOULLI	BSD68	27	180	0.832096	25.3962
BERNOULLI	BSD68	27	190	0.807444	24.7686
BERNOULLI	BSD68	27	200	0.775333	23.926
BERNOULLI	BSD68	27	210	0.728375	23.0117
BERNOULLI	BSD68	27	220	0.670486	21.9715
BERNOULLI	BSD68	27	230	0.596091	20.9454
BERNOULLI	BSD68	27	240	0.491557	19.7614
BERNOULLI	BSD68	47	150	0.942834	36.0521
BERNOULLI	BSD68	47	160	0.933025	35.4431
BERNOULLI	BSD68	47	170	0.926625	35.0289
BERNOULLI	BSD68	47	180	0.917455	34.5645
BERNOULLI	BSD68	47	190	0.905024	33.9594
BERNOULLI	BSD68	47	200	0.892025	33.4196
BERNOULLI	BSD68	47	210	0.878428	32.8954
BERNOULLI	BSD68	47	220	0.857022	32.0451
BERNOULLI	BSD68	47	230	0.833144	31.3282
BERNOULLI	BSD68	47	240	0.795874	30.02
BERNOULLI	BSD68	36	150	0.909034	28.1225
BERNOULLI	BSD68	36	160	0.89219	27.3483
BERNOULLI	BSD68	36	170	0.877114	26.8775
BERNOULLI	BSD68	36	180	0.854879	26.1425
BERNOULLI	BSD68	36	190	0.828435	25.3231
BERNOULLI	BSD68	36	200	0.79862	24.72
BERNOULLI	BSD68	36	210	0.762518	24.0464
BERNOULLI	BSD68	36	220	0.706503	23.0553
BERNOULLI	BSD68	36	230	0.62827	21.9771
BERNOULLI	BSD68	36	240	0.518814	20.7982
BERNOULLI	BSD68	43	150	0.883227	27.9145
BERNOULLI	BSD68	43	160	0.865921	27.2947
BERNOULLI	BSD68	43	170	0.849881	26.6977
BERNOULLI	BSD68	43	180	0.831492	26.1926
BERNOULLI	BSD68	43	190	0.807705	25.3634
BERNOULLI	BSD68	43	200	0.784325	24.7806
BERNOULLI	BSD68	43	210	0.757716	24.3696
BERNOULLI	BSD68	43	220	0.71709	23.4319
BERNOULLI	BSD68	43	230	0.66982	22.6342
BERNOULLI	BSD68	43	240	0.606863	21.479
BERNOULLI	BSD68	4	150	0.893265	29.046
BERNOULLI	BSD68	4	160	0.882959	28.5487
BERNOULLI	BSD68	4	170	0.8692	28.0675
BERNOULLI	BSD68	4	180	0.850612	27.405
BERNOULLI	BSD68	4	190	0.830471	26.6761
BERNOULLI	BSD68	4	200	0.80463	25.9
BERNOULLI	BSD68	4	210	0.77721	25.1801
BERNOULLI	BSD68	4	220	0.739848	24.3807
BERNOULLI	BSD68	4	230	0.691102	23.3768
BERNOULLI	BSD68	4	240	0.615977	21.9199
BERNOULLI	BSD68	64	150	0.89975	26.4387
BERNOULLI	BSD68	64	160	0.88742	26.0071
BERNOULLI	BSD68	64	170	0.866055	25.2887
BERNOULLI	BSD68	64	180	0.849328	24.7568
BERNOULLI	BSD68	64	190	0.826277	24.1894
BERNOULLI	BSD68	64	200	0.791122	23.5144
BERNOULLI	BSD68	64	210	0.756408	22.965
BERNOULLI	BSD68	64	220	0.707104	22.2221
BERNOULLI	BSD68	64	230	0.637691	21.3177
BERNOULLI	BSD68	64	240	0.52883	20.2763
BERNOULLI	BSD68	29	150	0.937371	30.2587
BERNOULLI	BSD68	29	160	0.928421	29.6002
BERNOULLI	BSD68	29	170	0.918183	28.8823
BERNOULLI	BSD68	29	180	0.906651	28.1486
BERNOULLI	BSD68	29	190	0.893453	27.3565
BERNOULLI	BSD68	29	200	0.871765	26.4621
BERNOULLI	BSD68	29	210	0.848761	25.7466
BERNOULLI	BSD68	29	220	0.810001	24.5315
BERNOULLI	BSD68	29	230	0.763887	23.3632
BERNOULLI	BSD68	29	240	0.676567	21.599
BERNOULLI	BSD68	58	150	0.882645	29.1237
BERNOULLI	BSD68	58	160	0.868628	28.6286
BERNOULLI	BSD68	58	170	0.851517	28.1571
BERNOULLI	BSD68	58	180	0.833133	27.6051
BERNOULLI	BSD68	58	190	0.815535	27.1557
BERNOULLI	BSD68	58	200	0.79096	26.5478
BERNOULLI	BSD68	58	210	0.762711	26.0268
BERNOULLI	BSD68	58	220	0.730013	25.3734
BERNOULLI	BSD68	58	230	0.690106	24.835
BERNOULLI	BSD68	58	240	0.637509	24.0438
BERNOULLI	BSD68	56	150	0.890309	28.0888
BERNOULLI	BSD68	56	160	0.876055	27.5315
BERNOULLI	BSD68	56	170	0.854434	26.7452
BERNOULLI	BSD68	56	180	0.836149	26.1882
BERNOULLI	BSD68	56	190	0.811416	25.4534
BERNOULLI	BSD68	56	200	0.77681	24.5571
BERNOULLI	BSD68	56	210	0.739999	23.847
BERNOULLI	BSD68	56	220	0.691898	23.0339
BERNOULLI	BSD68	56	230	0.635106	21.9701
BERNOULLI	BSD68	56	240	0.544294	20.6881
BERNOULLI	BSD68	13	150	0.931701	30.4231
BERNOULLI	BSD68	13	160	0.921511	29.8367
BERNOULLI	BSD68	13	170	0.916807	29.5511
BERNOULLI	BSD68	13	180	0.903467	28.8321
BERNOULLI	BSD68	13	190	0.896807	28.5092
BERNOULLI	BSD68	13	200	0.882556	28.1048
BERNOULLI	BSD68	13	210	0.869578	27.4899
BERNOULLI	BSD68	13	220	0.850704	26.9098
BERNOULLI	BSD68	13	230	0.834425	26.5512
BERNOULLI	BSD68	13	240	0.799755	25.6385
BERNOULLI	BSD68	65	150	0.842297	27.8663
BERNOULLI	BSD68	65	160	0.823089	27.3374
BERNOULLI	BSD68	65	170	0.798683	26.7695
BERNOULLI	BSD68	65	180	0.778313	26.2865
BERNOULLI	BSD68	65	190	0.748793	25.8176
BERNOULLI	BSD68	65	200	0.717126	25.2056
BERNOULLI	BSD68	65	210	0.677091	24.5703
BERNOULLI	BSD68	65	220	0.6359	23.8735
BERNOULLI	BSD68	65	230	0.571112	22.9174
BERNOULLI	BSD68	65	240	0.495174	21.8907
BERNOULLI	BSD68	3	150	0.89871	30.0097
BERNOULLI	BSD68	3	160	0.888649	29.5871
BERNOULLI	BSD68	3	170	0.872195	28.9
BERNOULLI	BSD68	3	180	0.856103	28.4495
BERNOULLI	BSD68	3	190	0.833773	27.7437
BERNOULLI	BSD68	3	200	0.815065	27.1364
BERNOULLI	BSD68	3	210	0.784511	26.3727
BERNOULLI	BSD68	3	220	0.748279	25.539
BERNOULLI	BSD68	3	230	0.700205	24.5466
BERNOULLI	BSD68	3	240	0.629783	23.4927
BERNOULLI	BSD68	44	150	0.907288	29.3617
BERNOULLI	BSD68	44	160	0.891155	28.5851
BERNOULLI	BSD68	44	170	0.878207	28.1251
BERNOULLI	BSD68	44	180	0.863418	27.5929
BERNOULLI	BSD68	44	190	0.841196	26.5918
BERNOULLI	BSD68	44	200	0.819146	25.9473
BERNOULLI	BSD68	44	210	0.793876	25.2687
BERNOULLI	BSD68	44	220	0.757895	24.4567
BERNOULLI	BSD68	44	230	0.721881	23.5407
BERNOULLI	BSD68	44	240	0.664033	22.4188
BERNOULLI	BSD68	24	150	0.870376	27.4189
BERNOULLI	BSD68	24	160	0.854423	26.8904
BERNOULLI	BSD68	24	170	0.841621	26.5032
BERNOULLI	BSD68	24	180	0.821407	25.8001
BERNOULLI	BSD68	24	190	0.804287	25.5403
BERNOULLI	BSD68	24	200	0.777864	24.7927
BERNOULLI	BSD68	24	210	0.749689	24.1716
BERNOULLI	BSD68	24	220	0.721647	23.6285
BERNOULLI	BSD68	24	230	0.681134	22.6306
BERNOULLI	BSD68	24	240	0.625001	21.3504
BERNOULLI	BSD68	2	150	0.947656	36.3259
BERNOULLI	BSD68	2	160	0.941889	35.7555
BERNOULLI	BSD68	2	170	0.935647	35.173
BERNOULLI	BSD68	2	180	0.928277	34.7487
BERNOULLI	BSD68	2	190	0.919195	33.7855
BERNOULLI	BSD68	2	200	0.905503	33.1817
BERNOULLI	BSD68	2	210	0.894037	32.3049
BERNOULLI	BSD68	2	220	0.874159	31.5907
BERNOULLI	BSD68	2	230	0.849206	30.5085
BERNOULLI	BSD68	2	240	0.809737	28.8848
BERNOULLI	BSD68	35	150	0.807615	23.2099
BERNOULLI	BSD68	35	160	0.78153	22.678
BERNOULLI	BSD68	35	170	0.74904	22.0957
BERNOULLI	BSD68	35	180	0.713716	21.5254
BERNOULLI	BSD68	35	190	0.668968	20.9641
BERNOULLI	BSD68	35	200	0.623471	20.4537
BERNOULLI	BSD68	35	210	0.56311	19.8597
BERNOULLI	BSD68	35	220	0.501719	19.3293
BERNOULLI	BSD68	35	230	0.415239	18.7171
BERNOULLI	BSD68	35	240	0.315975	18.0768
BERNOULLI	BSD68	22	150	0.931361	28.8971
BERNOULLI	BSD68	22	160	0.919486	27.8648
BERNOULLI	BSD68	22	170	0.907606	27.1963
BERNOULLI	BSD68	22	180	0.888847	26.314
BERNOULLI	BSD68	22	190	0.867812	25.2854
BERNOULLI	BSD68	22	200	0.842101	24.4315
BERNOULLI	BSD68	22	210	0.808525	23.3901
BERNOULLI	BSD68	22	220	0.758342	22.1571
BERNOULLI	BSD68	22	230	0.67709	20.5165
BERNOULLI	BSD68	22	240	0.567829	18.9841
BERNOULLI	BSD68	61	150	0.904161	32.8774
BERNOULLI	BSD68	61	160	0.893434	32.5049
BERNOULLI	BSD68	61	170	0.882938	32.0009
BERNOULLI	BSD68	61	180	0.870243	31.5977
BERNOULLI	BSD68	61	190	0.855398	31.1602
BERNOULLI	BSD68	61	200	0.841404	30.6544
BERNOULLI	BSD68	61	210	0.820198	30.138
BERNOULLI	BSD68	61	220	0.798356	29.5746
BERNOULLI	BSD68	61	230	0.77146	28.8291
BERNOULLI	BSD68	61	240	0.726744	27.7953
BERNOULLI	BSD68	20	150	0.925913	31.922
BERNOULLI	BSD68	20	160	0.917825	31.439
BERNOULLI	BSD68	20	170	0.906529	30.7644
BERNOULLI	BSD68	20	180	0.896158	30.3528
BERNOULLI	BSD68	20	190	0.879388	29.3429
BERNOULLI	BSD68	20	200	0.865435	29.0309
BERNOULLI	BSD68	20	210	0.842946	27.6511
BERNOULLI	BSD68	20	220	0.816274	26.7637
BERNOULLI	BSD68	20	230	0.782056	25.9978
BERNOULLI	BSD68	20	240	0.730806	24.5266
BERNOULLI	BSD68	10	150	0.915284	29.0331
BERNOULLI	BSD68	10	160	0.906779	28.5954
BERNOULLI	BSD68	10	170	0.893588	27.673
BERNOULLI	BSD68	10	180	0.882366	27.2557
BERNOULLI	BSD68	10	190	0.868893	26.5507
BERNOULLI	BSD68	10	200	0.852243	25.8526
BERNOULLI	BSD68	10	210	0.830735	25.1626
BERNOULLI	BSD68	10	220	0.80645	24.4577
BERNOULLI	BSD68	10	230	0.771517	23.3775
BERNOULLI	BSD68	10	240	0.720091	22.1404
BERNOULLI	BSD68	14	150	0.938307	30.1818
BERNOULLI	BSD68	14	160	0.926492	29.2632
BERNOULLI	BSD68	14	170	0.915431	28.8417
BERNOULLI	BSD68	14	180	0.900588	28.1292
BERNOULLI	BSD68	14	190	0.882092	27.3545
BERNOULLI	BSD68	14	200	0.852807	26.196
BERNOULLI	BSD68	14	210	0.817817	25.283
BERNOULLI	BSD68	14	220	0.775072	24.3052
BERNOULLI	BSD68	14	230	0.716216	23.2745
BERNOULLI	BSD68	14	240	0.611589	21.7145
BERNOULLI	BSD68	8	150	0.816774	25.5307
BERNOULLI	BSD68	8	160	0.798906	25.0505
BERNOULLI	BSD68	8	170	0.774562	24.6253
BERNOULLI	BSD68	8	180	0.749351	24.1422
BERNOULLI	BSD68	8	190	0.716995	23.5607
BERNOULLI	BSD68	8	200	0.682463	23.078
BERNOULLI	BSD68	8	210	0.640472	22.4088
BERNOULLI	BSD68	8	220	0.594856	21.8826
BERNOULLI	BSD68	8	230	0.53739	21.2992
BERNOULLI	BSD68	8	240	0.454852	20.3003
BERNOULLI	BSD68	42	150	0.978009	36.2442
BERNOULLI	BSD68	42	160	0.973909	35.6399
BERNOULLI	BSD68	42	170	0.971245	34.8439
BERNOULLI	BSD68	42	180	0.966702	34.2248
BERNOULLI	BSD68	42	190	0.962423	33.858
BERNOULLI	BSD68	42	200	0.954716	32.3863
BERNOULLI	BSD68	42	210	0.943613	31.312
BERNOULLI	BSD68	42	220	0.924386	29.8175
BERNOULLI	BSD68	42	230	0.893149	28.4343
BERNOULLI	BSD68	42	240	0.826248	25.7096
BERNOULLI	BSD68	38	150	0.928478	34.4032
BERNOULLI	BSD68	38	160	0.921174	34.2344
BERNOULLI	BSD68	38	170	0.912994	33.7012
BERNOULLI	BSD68	38	180	0.904757	33.1113
BERNOULLI	BSD68	38	190	0.895921	32.8594
BERNOULLI	BSD68	38	200	0.88166	32.1569
BERNOULLI	BSD68	38	210	0.866312	31.3471
BERNOULLI	BSD68	38	220	0.850583	30.2823
BERNOULLI	BSD68	38	230	0.82613	28.8664
BERNOULLI	BSD68	38	240	0.795018	27.4305
BERNOULLI	BSD68	25	150	0.892262	27.1358
BERNOULLI	BSD68	25	160	0.880956	26.6195
BERNOULLI	BSD68	25	170	0.869725	26.1614
BERNOULLI	BSD68	25	180	0.856869	25.6148
BERNOULLI	BSD68	25	190	0.83882	25.0227
BERNOULLI	BSD68	25	200	0.82431	24.5652
BERNOULLI	BSD68	25	210	0.800928	23.8509
BERNOULLI	BSD68	25	220	0.78261	23.3733
BERNOULLI	BSD68	25	230	0.747911	22.3041
BERNOULLI	BSD68	25	240	0.709875	21.443
BERNOULLI	BSD68	16	150	0.924592	30.0526
BERNOULLI	BSD68	16	160	0.917203	29.6504
BERNOULLI	BSD68	16	170	0.903682	28.9508
BERNOULLI	BSD68	16	180	0.889069	28.242
BERNOULLI	BSD68	16	190	0.873805	27.4308
BERNOULLI	BSD68	16	200	0.850962	26.7028
BERNOULLI	BSD68	16	210	0.821649	25.8817
BERNOULLI	BSD68	16	220	0.788356	24.9382
BERNOULLI	BSD68	16	230	0.748876	24.2469
BERNOULLI	BSD68	16	240	0.672476	22.541
BERNOULLI	BSD68	23	150	0.960489	35.5562
BERNOULLI	BSD68	23	160	0.956025	34.9496
BERNOULLI	BSD68	23	170	0.950538	34.2992
BERNOULLI	BSD68	23	180	0.944501	33.9213
BERNOULLI	BSD68	23	190	0.936256	33.2657
BERNOULLI	BSD68	23	200	0.926681	32.6174
BERNOULLI	BSD68	23	210	0.913515	31.5327
BERNOULLI	BSD68	23	220	0.896323	30.5591
BERNOULLI	BSD68	23	230	0.872287	29.5755
BERNOULLI	BSD68	23	240	0.835997	28.322
BERNOULLI	BSD68	15	150	0.864114	25.1682
BERNOULLI	BSD68	15	160	0.842659	24.5497
BERNOULLI	BSD68	15	170	0.820066	24.0848
BERNOULLI	BSD68	15	180	0.79649	23.6215
BERNOULLI	BSD68	15	190	0.760484	22.839
BERNOULLI	BSD68	15	200	0.718964	22.3891
BERNOULLI	BSD68	15	210	0.676743	21.6813
BERNOULLI	BSD68	15	220	0.62174	21.1069
BERNOULLI	BSD68	15	230	0.538098	20.2963
BERNOULLI	BSD68	15	240	0.459706	19.7359
BERNOULLI	BSD68	52	150	0.899242	27.2486
BERNOULLI	BSD68	52	160	0.886407	26.7581
BERNOULLI	BSD68	52	170	0.868754	25.7682
BERNOULLI	BSD68	52	180	0.847211	24.7808
BERNOULLI	BSD68	52	190	0.82505	23.9453
BERNOULLI	BSD68	52	200	0.799253	23.0182
BERNOULLI	BSD68	52	210	0.765559	21.9228
BERNOULLI	BSD68	52	220	0.719035	20.8406
BERNOULLI	BSD68	52	230	0.660225	19.5994
BERNOULLI	BSD68	52	240	0.58574	18.4713
BERNOULLI	BSD68	28	150	0.907631	27.6636
BERNOULLI	BSD68	28	160	0.894938	27.2486
BERNOULLI	BSD68	28	170	0.882612	26.7415
BERNOULLI	BSD68	28	180	0.867088	26.1654
BERNOULLI	BSD68	28	190	0.849107	25.5643
BERNOULLI	BSD68	28	200	0.829019	24.9197
BERNOULLI	BSD68	28	210	0.800267	24.2177
BERNOULLI	BSD68	28	220	0.76312	23.4166
BERNOULLI	BSD68	28	230	0.716132	22.6385
BERNOULLI	BSD68	28	240	0.635465	21.5037
BERNOULLI	BSD68	37	150	0.906565	26.5961
BERNOULLI	BSD68	37	160	0.896235	26.1255
BERNOULLI	BSD68	37	170	0.88131	25.4483
BERNOULLI	BSD68	37	180	0.869718	25.0499
BERNOULLI	BSD68	37	190	0.853702	24.4839
BERNOULLI	BSD68	37	200	0.832235	23.7347
BERNOULLI	BSD68	37	210	0.806059	23.1161
BERNOULLI	BSD68	37	220	0.777108	22.5185
BERNOULLI	BSD68	37	230	0.733262	21.5306
BERNOULLI	BSD68	37	240	0.669319	20.5092
BERNOULLI	BSD68	67	150	0.842567	24.1427
BERNOULLI	BSD68	67	160	0.826234	23.6602
BERNOULLI	BSD68	67	170	0.807178	23.144
BERNOULLI	BSD68	67	180	0.781147	22.6977
BERNOULLI	BSD68	67	190	0.758958	22.2162
BERNOULLI	BSD68	67	200	0.726583	21.5946
BERNOULLI	BSD68	67	210	0.692897	21.0503
BERNOULLI	BSD68	67	220	0.652646	20.5094
BERNOULLI	BSD68	67	230	0.611506	19.8957
BERNOULLI	BSD68	67	240	0.546011	19.0631
BERNOULLI	BSD68	40	150	0.866865	29.311
BERNOULLI	BSD68	40	160	0.856366	29.0619
BERNOULLI	BSD68	40	170	0.83867	28.5921
BERNOULLI	BSD68	40	180	0.817852	28.0766
BERNOULLI	BSD68	40	190	0.797026	27.4387
BERNOULLI	BSD68	40	200	0.774363	26.9438
BERNOULLI	BSD68	40	210	0.747639	26.4395
BERNOULLI	BSD68	40	220	0.71319	25.6208
BERNOULLI	BSD68	40	230	0.669741	24.9747
BERNOULLI	BSD68	40	240	0.618078	24.0702
BERNOULLI	BSD68	19	150	0.943416	32.8782
BERNOULLI	BSD68	19	160	0.933712	32.0931
BERNOULLI	BSD68	19	170	0.924834	31.5147
BERNOULLI	BSD68	19	180	0.911798	30.8328
BERNOULLI	BSD68	19	190	0.897703	30.1324
BERNOULLI	BSD68	19	200	0.878749	29.5207
BERNOULLI	BSD68	19	210	0.85128	28.5521
BERNOULLI	BSD68	19	220	0.817059	27.717
BERNOULLI	BSD68	19	230	0.767679	26.6773
BERNOULLI	BSD68	19	240	0.690362	25.2613
BERNOULLI	BSD68	33	150	0.804633	21.5167
BERNOULLI	BSD68	33	160	0.777702	21.0064
BERNOULLI	BSD68	33	170	0.749138	20.5003
BERNOULLI	BSD68	33	180	0.71644	19.9926
BERNOULLI	BSD68	33	190	0.679563	19.4223
BERNOULLI	BSD68	33	200	0.645763	19.0365
BERNOULLI	BSD68	33	210	0.604546	18.4801
BERNOULLI	BSD68	33	220	0.550579	17.9901
BERNOULLI	BSD68	33	230	0.482873	17.3142
BERNOULLI	BSD68	33	240	0.415898	16.5521
BERNOULLI	BSD68	6	150	0.955671	30.7444
BERNOULLI	BSD68	6	160	0.946535	29.6378
BERNOULLI	BSD68	6	170	0.937154	28.8677
BERNOULLI	BSD68	6	180	0.928425	27.9063
BERNOULLI	BSD68	6	190	0.915389	27.213
BERNOULLI	BSD68	6	200	0.897748	26.0916
BERNOULLI	BSD68	6	210	0.875631	25.0768
BERNOULLI	BSD68	6	220	0.842388	23.5402
BERNOULLI	BSD68	6	230	0.803607	22.205
BERNOULLI	BSD68	6	240	0.709929	19.7402
BERNOULLI	BSD68	62	150	0.894528	30.7974
BERNOULLI	BSD68	62	160	0.887109	30.3088
BERNOULLI	BSD68	62	170	0.869739	29.638
BERNOULLI	BSD68	62	180	0.858418	29.1886
BERNOULLI	BSD68	62	190	0.840835	28.5514
BERNOULLI	BSD68	62	200	0.821763	28.0045
BERNOULLI	BSD68	62	210	0.797442	27.3676
BERNOULLI	BSD68	62	220	0.772281	26.4031
BERNOULLI	BSD68	62	230	0.737441	25.5468
BERNOULLI	BSD68	62	240	0.689105	24.2133
BERNOULLI	BSD68	55	150	0.914958	30.4034
BERNOULLI	BSD68	55	160	0.901758	29.7344
BERNOULLI	BSD68	55	170	0.889013	29.0188
BERNOULLI	BSD68	55	180	0.871611	28.445
BERNOULLI	BSD68	55	190	0.849113	27.5149
BERNOULLI	BSD68	55	200	0.823566	26.7332
BERNOULLI	BSD68	55	210	0.794927	25.882
BERNOULLI	BSD68	55	220	0.753422	24.7808
BERNOULLI	BSD68	55	230	0.701813	23.6235
BERNOULLI	BSD68	55	240	0.623391	22.3176
BERNOULLI	BSD68	1	150	0.918668	31.0985
BERNOULLI	BSD68	1	160	0.906522	30.5132
BERNOULLI	BSD68	1	170	0.890418	29.6968
BERNOULLI	BSD68	1	180	0.870794	28.9679
BERNOULLI	BSD68	1	190	0.84872	28.1433
BERNOULLI	BSD68	1	200	0.81865	27.325
BERNOULLI	BSD68	1	210	0.78519	26.4784
BERNOULLI	BSD68	1	220	0.736735	25.448
BERNOULLI	BSD68	1	230	0.66338	24.1684
BERNOULLI	BSD68	1	240	0.560473	22.753
BERNOULLI	BSD68	46	150	0.886665	26.9957
BERNOULLI	BSD68	46	160	0.870317	26.4612
BERNOULLI	BSD68	46	170	0.850519	25.8543
BERNOULLI	BSD68	46	180	0.825254	25.1944
BERNOULLI	BSD68	46	190	0.796366	24.5676
BERNOULLI	BSD68	46	200	0.770184	24.0431
BERNOULLI	BSD68	46	210	0.728226	23.2858
BERNOULLI	BSD68	46	220	0.680181	22.5649
BERNOULLI	BSD68	46	230	0.616594	21.8325
BERNOULLI	BSD68	46	240	0.539475	20.9867
BERNOULLI	BSD68	51	150	0.84571	26.2849
BERNOULLI	BSD68	51	160	0.831233	25.9503
BERNOULLI	BSD68	51	170	0.806468	25.3375
BERNOULLI	BSD68	51	180	0.788253	24.9715
BERNOULLI	BSD68	51	190	0.764085	24.4951
BERNOULLI	BSD68	51	200	0.730662	23.9097
BERNOULLI	BSD68	51	210	0.695862	23.305
BERNOULLI	BSD68	51	220	0.654209	22.6489
BERNOULLI	BSD68	51	230	0.597632	22.046
BERNOULLI	BSD68	51	240	0.523906	21.1755
BERNOULLI	BSD68	32	150	0.917638	33.2922
BERNOULLI	BSD68	32	160	0.911396	32.9727
BERNOULLI	BSD68	32	170	0.904302	32.2213
BERNOULLI	BSD68	32	180	0.897893	31.64
BERNOULLI	BSD68	32	190	0.889273	30.983
BERNOULLI	BSD68	32	200	0.878391	30.0725
BERNOULLI	BSD68	32	210	0.86483	29.3273
BERNOULLI	BSD68	32	220	0.84756	28.3315
BERNOULLI	BSD68	32	230	0.831735	27.5287
BERNOULLI	BSD68	32	240	0.797893	25.4745
BERNOULLI	BSD68	34	150	0.940884	32.4947
BERNOULLI	BSD68	34	160	0.930819	31.7879
BERNOULLI	BSD68	34	170	0.919833	31.0885
BERNOULLI	BSD68	34	180	0.907926	30.3827
BERNOULLI	BSD68	34	190	0.892381	29.7227
BERNOULLI	BSD68	34	200	0.874688	28.9663
BERNOULLI	BSD68	34	210	0.850635	28.2374
BERNOULLI	BSD68	34	220	0.814197	27.2742
BERNOULLI	BSD68	34	230	0.770103	26.3336
BERNOULLI	BSD68	34	240	0.692368	25.0636
BERNOULLI	BSD68	54	150	0.894227	30.3008
BERNOULLI	BSD68	54	160	0.881353	29.6912
BERNOULLI	BSD68	54	170	0.864842	29.1615
BERNOULLI	BSD68	54	180	0.847892	28.5956
BERNOULLI	BSD68	54	190	0.829498	28.1397
BERNOULLI	BSD68	54	200	0.808128	27.4898
BERNOULLI	BSD68	54	210	0.786786	27.0493
BERNOULLI	BSD68	54	220	0.749286	26.392
BERNOULLI	BSD68	54	230	0.709416	25.7631
BERNOULLI	BSD68	54	240	0.66582	25.3642
BERNOULLI	Set12	3	150	0.937302	25.0374
BERNOULLI	Set12	3	160	0.930708	24.9734
BERNOULLI	Set12	3	170	0.924058	24.8185
BERNOULLI	Set12	3	180	0.9158	24.6094
BERNOULLI	Set12	3	190	0.907095	24.4228
BERNOULLI	Set12	3	200	0.896266	24.2732
BERNOULLI	Set12	3	210	0.879012	23.7544
BERNOULLI	Set12	3	220	0.862523	23.5489
BERNOULLI	Set12	3	230	0.825673	22.7333
BERNOULLI	Set12	3	240	0.766578	21.7266
BERNOULLI	Set12	9	150	0.907231	28.7942
BERNOULLI	Set12	9	160	0.89159	28.0053
BERNOULLI	Set12	9	170	0.873097	27.1793
BERNOULLI	Set12	9	180	0.852934	26.3694
BERNOULLI	Set12	9	190	0.830576	25.6258
BERNOULLI	Set12	9	200	0.799247	24.7471
BERNOULLI	Set12	9	210	0.768008	24.0703
BERNOULLI	Set12	9	220	0.735189	23.4583
BERNOULLI	Set12	9	230	0.69463	22.7379
BERNOULLI	Set12	9	240	0.642545	22.0249
BERNOULLI	Set12	5	150	0.965284	31.1729
BERNOULLI	Set12	5	160	0.957893	29.6924
BERNOULLI	Set12	5	170	0.953447	29.3914
BERNOULLI	Set12	5	180	0.945479	28.7788
BERNOULLI	Set12	5	190	0.933046	27.7074
BERNOULLI	Set12	5	200	0.920049	26.9349
BERNOULLI	Set12	5	210	0.903666	26.0887
BERNOULLI	Set12	5	220	0.873089	24.1447
BERNOULLI	Set12	5	230	0.826169	22.4381
BERNOULLI	Set12	5	240	0.74996	20.3144
BERNOULLI	Set12	10	150	0.901458	32.2948
BERNOULLI	Set12	10	160	0.891935	31.5965
BERNOULLI	Set12	10	170	0.878134	30.9183
BERNOULLI	Set12	10	180	0.864684	30.2373
BERNOULLI	Set12	10	190	0.84891	29.5348
BERNOULLI	Set12	10	200	0.830991	28.7962
BERNOULLI	Set12	10	210	0.804841	27.7789
BERNOULLI	Set12	10	220	0.770641	26.6823
BERNOULLI	Set12	10	230	0.722853	25.4236
BERNOULLI	Set12	10	240	0.655161	23.9098
BERNOULLI	Set12	2	150	0.93061	33.7729
BERNOULLI	Set12	2	160	0.924236	33.5663
BERNOULLI	Set12	2	170	0.913751	32.8911
BERNOULLI	Set12	2	180	0.907445	32.4331
BERNOULLI	Set12	2	190	0.891655	31.6751
BERNOULLI	Set12	2	200	0.875575	30.3492
BERNOULLI	Set12	2	210	0.860747	30.0597
BERNOULLI	Set12	2	220	0.841984	28.6234
BERNOULLI	Set12	2	230	0.808387	27.1472
BERNOULLI	Set12	2	240	0.766309	25.0615
BERNOULLI	Set12	8	150	0.933806	34.2142
BERNOULLI	Set12	8	160	0.92626	33.8468
BERNOULLI	Set12	8	170	0.920939	33.235
BERNOULLI	Set12	8	180	0.913092	32.7577
BERNOULLI	Set12	8	190	0.902896	31.9335
BERNOULLI	Set12	8	200	0.890693	31.3143
BERNOULLI	Set12	8	210	0.87715	30.5391
BERNOULLI	Set12	8	220	0.860222	29.713
BERNOULLI	Set12	8	230	0.83274	28.3641
BERNOULLI	Set12	8	240	0.787585	26.4302
BERNOULLI	Set12	12	150	0.927778	32.4519
BERNOULLI	Set12	12	160	0.916998	31.7079
BERNOULLI	Set12	12	170	0.906216	31.012
BERNOULLI	Set12	12	180	0.892682	30.3528
BERNOULLI	Set12	12	190	0.876106	29.5235
BERNOULLI	Set12	12	200	0.855089	28.6709
BERNOULLI	Set12	12	210	0.828548	27.8256
BERNOULLI	Set12	12	220	0.787815	26.6147
BERNOULLI	Set12	12	230	0.736627	25.4728
BERNOULLI	Set12	12	240	0.650897	23.7986
BERNOULLI	Set12	6	150	0.911143	26.8861
BERNOULLI	Set12	6	160	0.89652	26.0576
BERNOULLI	Set12	6	170	0.887688	25.71
BERNOULLI	Set12	6	180	0.874355	24.7668
BERNOULLI	Set12	6	190	0.858068	24.3115
BERNOULLI	Set12	6	200	0.838463	23.6086
BERNOULLI	Set12	6	210	0.817997	23.0172
BERNOULLI	Set12	6	220	0.788416	22.102
BERNOULLI	Set12	6	230	0.742374	21.0282
BERNOULLI	Set12	6	240	0.689143	20.0258
BERNOULLI	Set12	7	150	0.925383	28.7405
BERNOULLI	Set12	7	160	0.917688	28.2268
BERNOULLI	Set12	7	170	0.910818	28.0112
BERNOULLI	Set12	7	180	0.899084	27.1077
BERNOULLI	Set12	7	190	0.887743	26.223
BERNOULLI	Set12	7	200	0.869918	25.1259
BERNOULLI	Set12	7	210	0.853642	24.1985
BERNOULLI	Set12	7	220	0.824356	23.1409
BERNOULLI	Set12	7	230	0.784811	21.4126
BERNOULLI	Set12	7	240	0.725964	19.6273
BERNOULLI	Set12	4	150	0.931667	31.1127
BERNOULLI	Set12	4	160	0.923889	30.517
BERNOULLI	Set12	4	170	0.915716	29.7159
BERNOULLI	Set12	4	180	0.903073	28.7918
BERNOULLI	Set12	4	190	0.885221	27.915
BERNOULLI	Set12	4	200	0.869617	27.064
BERNOULLI	Set12	4	210	0.837922	25.6694
BERNOULLI	Set12	4	220	0.799866	24.4504
BERNOULLI	Set12	4	230	0.744765	23.0688
BERNOULLI	Set12	4	240	0.659741	21.6481
BERNOULLI	Set12	11	150	0.922373	32.2528
BERNOULLI	Set12	11	160	0.913296	31.6905
BERNOULLI	Set12	11	170	0.900518	31.0383
BERNOULLI	Set12	11	180	0.886953	30.4225
BERNOULLI	Set12	11	190	0.873827	29.8919
BERNOULLI	Set12	11	200	0.855229	29.1908
BERNOULLI	Set12	11	210	0.832032	28.3841
BERNOULLI	Set12	11	220	0.802271	27.373
BERNOULLI	Set12	11	230	0.761179	26.4587
BERNOULLI	Set12	11	240	0.69198	24.7933
BERNOULLI	Set12	1	150	0.906923	28.6314
BERNOULLI	Set12	1	160	0.901561	28.044
BERNOULLI	Set12	1	170	0.894158	27.5817
BERNOULLI	Set12	1	180	0.875612	26.6399
BERNOULLI	Set12	1	190	0.863806	26.0406
BERNOULLI	Set12	1	200	0.848667	25.1652
BERNOULLI	Set12	1	210	0.826629	24.3946
BERNOULLI	Set12	1	220	0.795343	23.3318
BERNOULLI	Set12	1	230	0.767778	22.7945
BERNOULLI	Set12	1	240	0.704716	21.1023
BERNOULLI	Urban100	img_084_SRF_2_HR	150	0.935064	30.7267
BERNOULLI	Urban100	img_084_SRF_2_HR	160	0.924721	30.0775
BERNOULLI	Urban100	img_084_SRF_2_HR	170	0.910952	29.2197
BERNOULLI	Urban100	img_084_SRF_2_HR	180	0.895794	28.4622
BERNOULLI	Urban100	img_084_SRF_2_HR	190	0.874755	27.5278
BERNOULLI	Urban100	img_084_SRF_2_HR	200	0.849305	26.5679
BERNOULLI	Urban100	img_084_SRF_2_HR	210	0.816001	25.6476
BERNOULLI	Urban100	img_084_SRF_2_HR	220	0.766645	24.5305
BERNOULLI	Urban100	img_084_SRF_2_HR	230	0.698132	23.1043
BERNOULLI	Urban100	img_084_SRF_2_HR	240	0.594804	21.6412
BERNOULLI	Urban100	img_011_SRF_2_HR	150	0.949954	24.2812
BERNOULLI	Urban100	img_011_SRF_2_HR	160	0.940717	23.4964
BERNOULLI	Urban100	img_011_SRF_2_HR	170	0.927786	22.2965
BERNOULLI	Urban100	img_011_SRF_2_HR	180	0.913009	21.5083
BERNOULLI	Urban100	img_011_SRF_2_HR	190	0.892695	20.2615
BERNOULLI	Urban100	img_011_SRF_2_HR	200	0.864156	18.9968
BERNOULLI	Urban100	img_011_SRF_2_HR	210	0.821284	17.5389
BERNOULLI	Urban100	img_011_SRF_2_HR	220	0.757774	15.9355
BERNOULLI	Urban100	img_011_SRF_2_HR	230	0.672084	14.3878
BERNOULLI	Urban100	img_011_SRF_2_HR	240	0.547654	12.7475
BERNOULLI	Urban100	img_006_SRF_2_HR	150	0.882371	26.0838
BERNOULLI	Urban100	img_006_SRF_2_HR	160	0.863859	25.1996
BERNOULLI	Urban100	img_006_SRF_2_HR	170	0.844263	24.5226
BERNOULLI	Urban100	img_006_SRF_2_HR	180	0.816572	23.6399
BERNOULLI	Urban100	img_006_SRF_2_HR	190	0.790486	22.9716
BERNOULLI	Urban100	img_006_SRF_2_HR	200	0.750899	22.0459
BERNOULLI	Urban100	img_006_SRF_2_HR	210	0.711042	21.3329
BERNOULLI	Urban100	img_006_SRF_2_HR	220	0.653516	20.3661
BERNOULLI	Urban100	img_006_SRF_2_HR	230	0.57689	19.3835
BERNOULLI	Urban100	img_006_SRF_2_HR	240	0.475778	18.33
BERNOULLI	Urban100	img_003_SRF_2_HR	150	0.895537	27.5605
BERNOULLI	Urban100	img_003_SRF_2_HR	160	0.880758	26.8485
BERNOULLI	Urban100	img_003_SRF_2_HR	170	0.861204	26.2083
BERNOULLI	Urban100	img_003_SRF_2_HR	180	0.839172	25.451
BERNOULLI	Urban100	img_003_SRF_2_HR	190	0.813879	24.7616
BERNOULLI	Urban100	img_003_SRF_2_HR	200	0.786512	24.0537
BERNOULLI	Urban100	img_003_SRF_2_HR	210	0.744997	23.1373
BERNOULLI	Urban100	img_003_SRF_2_HR	220	0.693095	22.1626
BERNOULLI	Urban100	img_003_SRF_2_HR	230	0.62385	21.0324
BERNOULLI	Urban100	img_003_SRF_2_HR	240	0.52085	19.6668
BERNOULLI	Urban100	img_073_SRF_2_HR	150	0.862278	24.0702
BERNOULLI	Urban100	img_073_SRF_2_HR	160	0.841902	23.4727
BERNOULLI	Urban100	img_073_SRF_2_HR	170	0.816421	22.798
BERNOULLI	Urban100	img_073_SRF_2_HR	180	0.788075	22.1912
BERNOULLI	Urban100	img_073_SRF_2_HR	190	0.755403	21.5324
BERNOULLI	Urban100	img_073_SRF_2_HR	200	0.71067	20.8507
BERNOULLI	Urban100	img_073_SRF_2_HR	210	0.662343	20.1821
BERNOULLI	Urban100	img_073_SRF_2_HR	220	0.583198	19.2009
BERNOULLI	Urban100	img_073_SRF_2_HR	230	0.48901	18.2585
BERNOULLI	Urban100	img_073_SRF_2_HR	240	0.367226	17.293
BERNOULLI	Urban100	img_057_SRF_2_HR	150	0.939857	30.3696
BERNOULLI	Urban100	img_057_SRF_2_HR	160	0.931456	29.9497
BERNOULLI	Urban100	img_057_SRF_2_HR	170	0.921147	29.0281
BERNOULLI	Urban100	img_057_SRF_2_HR	180	0.906674	28.01
BERNOULLI	Urban100	img_057_SRF_2_HR	190	0.891309	27.3202
BERNOULLI	Urban100	img_057_SRF_2_HR	200	0.867538	25.9061
BERNOULLI	Urban100	img_057_SRF_2_HR	210	0.840448	24.6576
BERNOULLI	Urban100	img_057_SRF_2_HR	220	0.803051	23.3419
BERNOULLI	Urban100	img_057_SRF_2_HR	230	0.750705	22.0533
BERNOULLI	Urban100	img_057_SRF_2_HR	240	0.66353	20.177
BERNOULLI	Urban100	img_016_SRF_2_HR	150	0.648285	6.57108
BERNOULLI	Urban100	img_016_SRF_2_HR	160	0.643574	6.5485
BERNOULLI	Urban100	img_016_SRF_2_HR	170	0.639917	6.6469
BERNOULLI	Urban100	img_016_SRF_2_HR	180	0.633651	6.77798
BERNOULLI	Urban100	img_016_SRF_2_HR	190	0.624804	6.93149
BERNOULLI	Urban100	img_016_SRF_2_HR	200	0.613553	7.22533
BERNOULLI	Urban100	img_016_SRF_2_HR	210	0.599526	7.62857
BERNOULLI	Urban100	img_016_SRF_2_HR	220	0.580901	8.06866
BERNOULLI	Urban100	img_016_SRF_2_HR	230	0.547925	8.54358
BERNOULLI	Urban100	img_016_SRF_2_HR	240	0.482041	9.0507
BERNOULLI	Urban100	img_002_SRF_2_HR	150	0.942777	29.2173
BERNOULLI	Urban100	img_002_SRF_2_HR	160	0.931047	28.3715
BERNOULLI	Urban100	img_002_SRF_2_HR	170	0.920411	27.7064
BERNOULLI	Urban100	img_002_SRF_2_HR	180	0.905678	26.7417
BERNOULLI	Urban100	img_002_SRF_2_HR	190	0.888097	26.0431
BERNOULLI	Urban100	img_002_SRF_2_HR	200	0.864238	25.1303
BERNOULLI	Urban100	img_002_SRF_2_HR	210	0.832716	24.2363
BERNOULLI	Urban100	img_002_SRF_2_HR	220	0.791464	23.1711
BERNOULLI	Urban100	img_002_SRF_2_HR	230	0.721542	21.7635
BERNOULLI	Urban100	img_002_SRF_2_HR	240	0.621561	20.1327
BERNOULLI	Urban100	img_044_SRF_2_HR	150	0.957561	31.8871
BERNOULLI	Urban100	img_044_SRF_2_HR	160	0.946652	30.9404
BERNOULLI	Urban100	img_044_SRF_2_HR	170	0.9323	29.7929
BERNOULLI	Urban100	img_044_SRF_2_HR	180	0.911785	28.6644
BERNOULLI	Urban100	img_044_SRF_2_HR	190	0.88517	27.4869
BERNOULLI	Urban100	img_044_SRF_2_HR	200	0.851282	26.4239
BERNOULLI	Urban100	img_044_SRF_2_HR	210	0.800461	24.9358
BERNOULLI	Urban100	img_044_SRF_2_HR	220	0.731031	23.6431
BERNOULLI	Urban100	img_044_SRF_2_HR	230	0.641044	22.3668
BERNOULLI	Urban100	img_044_SRF_2_HR	240	0.513516	20.9194
BERNOULLI	Urban100	img_060_SRF_2_HR	150	0.88704	26.9242
BERNOULLI	Urban100	img_060_SRF_2_HR	160	0.873335	26.3954
BERNOULLI	Urban100	img_060_SRF_2_HR	170	0.851492	25.6225
BERNOULLI	Urban100	img_060_SRF_2_HR	180	0.825835	24.9048
BERNOULLI	Urban100	img_060_SRF_2_HR	190	0.800258	24.3219
BERNOULLI	Urban100	img_060_SRF_2_HR	200	0.766905	23.5218
BERNOULLI	Urban100	img_060_SRF_2_HR	210	0.722243	22.6998
BERNOULLI	Urban100	img_060_SRF_2_HR	220	0.67095	21.859
BERNOULLI	Urban100	img_060_SRF_2_HR	230	0.599418	20.8021
BERNOULLI	Urban100	img_060_SRF_2_HR	240	0.497406	19.6449
BERNOULLI	Urban100	img_075_SRF_2_HR	150	0.952681	33.1153
BERNOULLI	Urban100	img_075_SRF_2_HR	160	0.947371	32.4793
BERNOULLI	Urban100	img_075_SRF_2_HR	170	0.940239	31.4603
BERNOULLI	Urban100	img_075_SRF_2_HR	180	0.931777	30.6756
BERNOULLI	Urban100	img_075_SRF_2_HR	190	0.921885	29.648
BERNOULLI	Urban100	img_075_SRF_2_HR	200	0.907784	28.4684
BERNOULLI	Urban100	img_075_SRF_2_HR	210	0.892301	27.4749
BERNOULLI	Urban100	img_075_SRF_2_HR	220	0.868353	26.3096
BERNOULLI	Urban100	img_075_SRF_2_HR	230	0.833535	24.7642
BERNOULLI	Urban100	img_075_SRF_2_HR	240	0.781337	22.9182
BERNOULLI	Urban100	img_029_SRF_2_HR	150	0.928702	28.6017
BERNOULLI	Urban100	img_029_SRF_2_HR	160	0.914632	27.745
BERNOULLI	Urban100	img_029_SRF_2_HR	170	0.898197	27.0042
BERNOULLI	Urban100	img_029_SRF_2_HR	180	0.879859	26.0993
BERNOULLI	Urban100	img_029_SRF_2_HR	190	0.857377	25.1944
BERNOULLI	Urban100	img_029_SRF_2_HR	200	0.829898	24.6059
BERNOULLI	Urban100	img_029_SRF_2_HR	210	0.793805	23.4671
BERNOULLI	Urban100	img_029_SRF_2_HR	220	0.740144	22.3942
BERNOULLI	Urban100	img_029_SRF_2_HR	230	0.67642	21.123
BERNOULLI	Urban100	img_029_SRF_2_HR	240	0.583666	19.5358
BERNOULLI	Urban100	img_012_SRF_2_HR	150	0.907573	27.4333
BERNOULLI	Urban100	img_012_SRF_2_HR	160	0.894155	26.7897
BERNOULLI	Urban100	img_012_SRF_2_HR	170	0.880498	26.2416
BERNOULLI	Urban100	img_012_SRF_2_HR	180	0.859396	25.5532
BERNOULLI	Urban100	img_012_SRF_2_HR	190	0.833481	24.8207
BERNOULLI	Urban100	img_012_SRF_2_HR	200	0.808007	24.0833
BERNOULLI	Urban100	img_012_SRF_2_HR	210	0.766458	23.3525
BERNOULLI	Urban100	img_012_SRF_2_HR	220	0.721941	22.534
BERNOULLI	Urban100	img_012_SRF_2_HR	230	0.655673	21.409
BERNOULLI	Urban100	img_012_SRF_2_HR	240	0.56859	20.2537
BERNOULLI	Urban100	img_069_SRF_2_HR	150	0.914153	27.7467
BERNOULLI	Urban100	img_069_SRF_2_HR	160	0.90278	27.238
BERNOULLI	Urban100	img_069_SRF_2_HR	170	0.88432	26.4968
BERNOULLI	Urban100	img_069_SRF_2_HR	180	0.867807	25.8297
BERNOULLI	Urban100	img_069_SRF_2_HR	190	0.842535	25.0632
BERNOULLI	Urban100	img_069_SRF_2_HR	200	0.811928	24.2679
BERNOULLI	Urban100	img_069_SRF_2_HR	210	0.775207	23.4699
BERNOULLI	Urban100	img_069_SRF_2_HR	220	0.724447	22.4669
BERNOULLI	Urban100	img_069_SRF_2_HR	230	0.660223	21.371
BERNOULLI	Urban100	img_069_SRF_2_HR	240	0.566535	20.1283
BERNOULLI	Urban100	img_018_SRF_2_HR	150	0.89177	28.7487
BERNOULLI	Urban100	img_018_SRF_2_HR	160	0.877004	28.1734
BERNOULLI	Urban100	img_018_SRF_2_HR	170	0.859005	27.4255
BERNOULLI	Urban100	img_018_SRF_2_HR	180	0.839074	26.9981
BERNOULLI	Urban100	img_018_SRF_2_HR	190	0.81552	26.1323
BERNOULLI	Urban100	img_018_SRF_2_HR	200	0.784048	25.2697
BERNOULLI	Urban100	img_018_SRF_2_HR	210	0.744442	24.528
BERNOULLI	Urban100	img_018_SRF_2_HR	220	0.692029	23.5875
BERNOULLI	Urban100	img_018_SRF_2_HR	230	0.619316	22.4218
BERNOULLI	Urban100	img_018_SRF_2_HR	240	0.512915	20.9022
BERNOULLI	Urban100	img_093_SRF_2_HR	150	0.959927	29.2176
BERNOULLI	Urban100	img_093_SRF_2_HR	160	0.953418	28.1377
BERNOULLI	Urban100	img_093_SRF_2_HR	170	0.946162	27.6404
BERNOULLI	Urban100	img_093_SRF_2_HR	180	0.939554	26.954
BERNOULLI	Urban100	img_093_SRF_2_HR	190	0.928682	25.9425
BERNOULLI	Urban100	img_093_SRF_2_HR	200	0.9109	24.7419
BERNOULLI	Urban100	img_093_SRF_2_HR	210	0.894207	23.6988
BERNOULLI	Urban100	img_093_SRF_2_HR	220	0.8566	22.1286
BERNOULLI	Urban100	img_093_SRF_2_HR	230	0.802182	20.192
BERNOULLI	Urban100	img_093_SRF_2_HR	240	0.679985	17.6581
BERNOULLI	Urban100	img_072_SRF_2_HR	150	0.937831	22.0272
BERNOULLI	Urban100	img_072_SRF_2_HR	160	0.924628	21.1374
BERNOULLI	Urban100	img_072_SRF_2_HR	170	0.906324	20.1158
BERNOULLI	Urban100	img_072_SRF_2_HR	180	0.884577	19.1513
BERNOULLI	Urban100	img_072_SRF_2_HR	190	0.856598	18.1752
BERNOULLI	Urban100	img_072_SRF_2_HR	200	0.818728	17.1639
BERNOULLI	Urban100	img_072_SRF_2_HR	210	0.770156	16.0739
BERNOULLI	Urban100	img_072_SRF_2_HR	220	0.695928	14.8331
BERNOULLI	Urban100	img_072_SRF_2_HR	230	0.598178	13.5923
BERNOULLI	Urban100	img_072_SRF_2_HR	240	0.451402	12.2329
BERNOULLI	Urban100	img_010_SRF_2_HR	150	0.941293	27.4027
BERNOULLI	Urban100	img_010_SRF_2_HR	160	0.931469	26.7516
BERNOULLI	Urban100	img_010_SRF_2_HR	170	0.922481	26.1801
BERNOULLI	Urban100	img_010_SRF_2_HR	180	0.908672	25.4362
BERNOULLI	Urban100	img_010_SRF_2_HR	190	0.895278	24.9055
BERNOULLI	Urban100	img_010_SRF_2_HR	200	0.872698	24.0884
BERNOULLI	Urban100	img_010_SRF_2_HR	210	0.849858	23.0548
BERNOULLI	Urban100	img_010_SRF_2_HR	220	0.813551	22.218
BERNOULLI	Urban100	img_010_SRF_2_HR	230	0.764211	21.169
BERNOULLI	Urban100	img_010_SRF_2_HR	240	0.697678	20.0491
BERNOULLI	Urban100	img_058_SRF_2_HR	150	0.919286	22.4343
BERNOULLI	Urban100	img_058_SRF_2_HR	160	0.90786	22.0933
BERNOULLI	Urban100	img_058_SRF_2_HR	170	0.895401	21.6848
BERNOULLI	Urban100	img_058_SRF_2_HR	180	0.879148	21.2503
BERNOULLI	Urban100	img_058_SRF_2_HR	190	0.856547	20.5165
BERNOULLI	Urban100	img_058_SRF_2_HR	200	0.831114	19.858
BERNOULLI	Urban100	img_058_SRF_2_HR	210	0.797108	19.2361
BERNOULLI	Urban100	img_058_SRF_2_HR	220	0.73854	18.1742
BERNOULLI	Urban100	img_058_SRF_2_HR	230	0.660027	16.7467
BERNOULLI	Urban100	img_058_SRF_2_HR	240	0.544387	15.146
BERNOULLI	Urban100	img_007_SRF_2_HR	150	0.952354	30.6526
BERNOULLI	Urban100	img_007_SRF_2_HR	160	0.944799	29.8418
BERNOULLI	Urban100	img_007_SRF_2_HR	170	0.934949	29.0701
BERNOULLI	Urban100	img_007_SRF_2_HR	180	0.92331	28.0959
BERNOULLI	Urban100	img_007_SRF_2_HR	190	0.906938	27.0303
BERNOULLI	Urban100	img_007_SRF_2_HR	200	0.88876	26.2992
BERNOULLI	Urban100	img_007_SRF_2_HR	210	0.860223	24.9923
BERNOULLI	Urban100	img_007_SRF_2_HR	220	0.822276	23.705
BERNOULLI	Urban100	img_007_SRF_2_HR	230	0.750059	21.7223
BERNOULLI	Urban100	img_007_SRF_2_HR	240	0.635324	19.6024
BERNOULLI	Urban100	img_020_SRF_2_HR	150	0.896341	24.3275
BERNOULLI	Urban100	img_020_SRF_2_HR	160	0.881092	23.66
BERNOULLI	Urban100	img_020_SRF_2_HR	170	0.863222	23.0534
BERNOULLI	Urban100	img_020_SRF_2_HR	180	0.839461	22.2513
BERNOULLI	Urban100	img_020_SRF_2_HR	190	0.813415	21.604
BERNOULLI	Urban100	img_020_SRF_2_HR	200	0.783091	20.9183
BERNOULLI	Urban100	img_020_SRF_2_HR	210	0.742922	20.0905
BERNOULLI	Urban100	img_020_SRF_2_HR	220	0.69165	19.3543
BERNOULLI	Urban100	img_020_SRF_2_HR	230	0.625317	18.4577
BERNOULLI	Urban100	img_020_SRF_2_HR	240	0.533057	17.3756
BERNOULLI	Urban100	img_047_SRF_2_HR	150	0.905569	24.8496
BERNOULLI	Urban100	img_047_SRF_2_HR	160	0.89043	24.2427
BERNOULLI	Urban100	img_047_SRF_2_HR	170	0.875118	23.6067
BERNOULLI	Urban100	img_047_SRF_2_HR	180	0.853383	22.8073
BERNOULLI	Urban100	img_047_SRF_2_HR	190	0.824749	22.0706
BERNOULLI	Urban100	img_047_SRF_2_HR	200	0.794225	21.2993
BERNOULLI	Urban100	img_047_SRF_2_HR	210	0.755126	20.6487
BERNOULLI	Urban100	img_047_SRF_2_HR	220	0.705538	19.8352
BERNOULLI	Urban100	img_047_SRF_2_HR	230	0.634714	18.894
BERNOULLI	Urban100	img_047_SRF_2_HR	240	0.559818	17.8669
BERNOULLI	Urban100	img_008_SRF_2_HR	150	0.873494	24.0677
BERNOULLI	Urban100	img_008_SRF_2_HR	160	0.851161	23.396
BERNOULLI	Urban100	img_008_SRF_2_HR	170	0.825908	22.7451
BERNOULLI	Urban100	img_008_SRF_2_HR	180	0.801687	22.1149
BERNOULLI	Urban100	img_008_SRF_2_HR	190	0.763642	21.3801
BERNOULLI	Urban100	img_008_SRF_2_HR	200	0.720981	20.5834
BERNOULLI	Urban100	img_008_SRF_2_HR	210	0.6704	19.9238
BERNOULLI	Urban100	img_008_SRF_2_HR	220	0.607513	19.195
BERNOULLI	Urban100	img_008_SRF_2_HR	230	0.521177	18.242
BERNOULLI	Urban100	img_008_SRF_2_HR	240	0.411844	17.2951
BERNOULLI	Urban100	img_045_SRF_2_HR	150	0.963853	28.7908
BERNOULLI	Urban100	img_045_SRF_2_HR	160	0.955887	27.9949
BERNOULLI	Urban100	img_045_SRF_2_HR	170	0.945278	27.0054
BERNOULLI	Urban100	img_045_SRF_2_HR	180	0.93189	26.0728
BERNOULLI	Urban100	img_045_SRF_2_HR	190	0.913191	25.0535
BERNOULLI	Urban100	img_045_SRF_2_HR	200	0.888314	24.1345
BERNOULLI	Urban100	img_045_SRF_2_HR	210	0.845187	22.823
BERNOULLI	Urban100	img_045_SRF_2_HR	220	0.79166	21.499
BERNOULLI	Urban100	img_045_SRF_2_HR	230	0.71223	20.1311
BERNOULLI	Urban100	img_045_SRF_2_HR	240	0.541355	17.9868
BERNOULLI	Urban100	img_043_SRF_2_HR	150	0.964101	30.8591
BERNOULLI	Urban100	img_043_SRF_2_HR	160	0.958935	29.688
BERNOULLI	Urban100	img_043_SRF_2_HR	170	0.951547	28.2213
BERNOULLI	Urban100	img_043_SRF_2_HR	180	0.944143	27.4861
BERNOULLI	Urban100	img_043_SRF_2_HR	190	0.931557	25.78
BERNOULLI	Urban100	img_043_SRF_2_HR	200	0.917652	24.5794
BERNOULLI	Urban100	img_043_SRF_2_HR	210	0.896163	22.9907
BERNOULLI	Urban100	img_043_SRF_2_HR	220	0.863705	21.424
BERNOULLI	Urban100	img_043_SRF_2_HR	230	0.814649	19.27
BERNOULLI	Urban100	img_043_SRF_2_HR	240	0.710421	16.1559
BERNOULLI	Urban100	img_048_SRF_2_HR	150	0.904894	22.1866
BERNOULLI	Urban100	img_048_SRF_2_HR	160	0.891047	21.5308
BERNOULLI	Urban100	img_048_SRF_2_HR	170	0.868281	20.8307
BERNOULLI	Urban100	img_048_SRF_2_HR	180	0.852219	20.3178
BERNOULLI	Urban100	img_048_SRF_2_HR	190	0.825943	19.534
BERNOULLI	Urban100	img_048_SRF_2_HR	200	0.801149	18.9495
BERNOULLI	Urban100	img_048_SRF_2_HR	210	0.767136	18.1826
BERNOULLI	Urban100	img_048_SRF_2_HR	220	0.722855	17.4737
BERNOULLI	Urban100	img_048_SRF_2_HR	230	0.668224	16.6685
BERNOULLI	Urban100	img_048_SRF_2_HR	240	0.594978	15.7307
BERNOULLI	Urban100	img_061_SRF_2_HR	150	0.90174	26.8117
BERNOULLI	Urban100	img_061_SRF_2_HR	160	0.886715	26.1977
BERNOULLI	Urban100	img_061_SRF_2_HR	170	0.868628	25.5523
BERNOULLI	Urban100	img_061_SRF_2_HR	180	0.848824	24.9089
BERNOULLI	Urban100	img_061_SRF_2_HR	190	0.825018	24.2489
BERNOULLI	Urban100	img_061_SRF_2_HR	200	0.792477	23.4319
BERNOULLI	Urban100	img_061_SRF_2_HR	210	0.757797	22.7104
BERNOULLI	Urban100	img_061_SRF_2_HR	220	0.705434	21.7976
BERNOULLI	Urban100	img_061_SRF_2_HR	230	0.643187	20.8444
BERNOULLI	Urban100	img_061_SRF_2_HR	240	0.54373	19.6694
BERNOULLI	Urban100	img_015_SRF_2_HR	150	0.930845	29.1263
BERNOULLI	Urban100	img_015_SRF_2_HR	160	0.920305	28.2559
BERNOULLI	Urban100	img_015_SRF_2_HR	170	0.909741	27.516
BERNOULLI	Urban100	img_015_SRF_2_HR	180	0.894517	26.753
BERNOULLI	Urban100	img_015_SRF_2_HR	190	0.879118	25.8846
BERNOULLI	Urban100	img_015_SRF_2_HR	200	0.854361	24.8885
BERNOULLI	Urban100	img_015_SRF_2_HR	210	0.822267	23.8017
BERNOULLI	Urban100	img_015_SRF_2_HR	220	0.781498	22.622
BERNOULLI	Urban100	img_015_SRF_2_HR	230	0.718055	21.1373
BERNOULLI	Urban100	img_015_SRF_2_HR	240	0.627684	19.4637
BERNOULLI	Urban100	img_049_SRF_2_HR	150	0.929381	24.8478
BERNOULLI	Urban100	img_049_SRF_2_HR	160	0.916677	24.2511
BERNOULLI	Urban100	img_049_SRF_2_HR	170	0.901817	23.6029
BERNOULLI	Urban100	img_049_SRF_2_HR	180	0.88232	22.6691
BERNOULLI	Urban100	img_049_SRF_2_HR	190	0.855769	21.827
BERNOULLI	Urban100	img_049_SRF_2_HR	200	0.83045	21.0974
BERNOULLI	Urban100	img_049_SRF_2_HR	210	0.789453	20.0929
BERNOULLI	Urban100	img_049_SRF_2_HR	220	0.733601	18.9586
BERNOULLI	Urban100	img_049_SRF_2_HR	230	0.648917	17.6919
BERNOULLI	Urban100	img_049_SRF_2_HR	240	0.531741	16.1961
BERNOULLI	Urban100	img_087_SRF_2_HR	150	0.962257	30.4568
BERNOULLI	Urban100	img_087_SRF_2_HR	160	0.954246	29.4049
BERNOULLI	Urban100	img_087_SRF_2_HR	170	0.945224	28.3046
BERNOULLI	Urban100	img_087_SRF_2_HR	180	0.934409	27.3853
BERNOULLI	Urban100	img_087_SRF_2_HR	190	0.918432	26.3198
BERNOULLI	Urban100	img_087_SRF_2_HR	200	0.89853	25.0029
BERNOULLI	Urban100	img_087_SRF_2_HR	210	0.870752	23.8434
BERNOULLI	Urban100	img_087_SRF_2_HR	220	0.835896	22.8418
BERNOULLI	Urban100	img_087_SRF_2_HR	230	0.77718	21.1503
BERNOULLI	Urban100	img_087_SRF_2_HR	240	0.682317	19.1834
BERNOULLI	Urban100	img_096_SRF_2_HR	150	0.952823	28.5269
BERNOULLI	Urban100	img_096_SRF_2_HR	160	0.945773	27.875
BERNOULLI	Urban100	img_096_SRF_2_HR	170	0.935055	27.0033
BERNOULLI	Urban100	img_096_SRF_2_HR	180	0.92215	26.0902
BERNOULLI	Urban100	img_096_SRF_2_HR	190	0.903877	25.149
BERNOULLI	Urban100	img_096_SRF_2_HR	200	0.88176	24.2192
BERNOULLI	Urban100	img_096_SRF_2_HR	210	0.850446	22.9975
BERNOULLI	Urban100	img_096_SRF_2_HR	220	0.808906	21.9181
BERNOULLI	Urban100	img_096_SRF_2_HR	230	0.737775	20.485
BERNOULLI	Urban100	img_096_SRF_2_HR	240	0.633921	19.0255
BERNOULLI	Urban100	img_094_SRF_2_HR	150	0.931926	31.1798
BERNOULLI	Urban100	img_094_SRF_2_HR	160	0.923557	30.7063
BERNOULLI	Urban100	img_094_SRF_2_HR	170	0.912932	29.8236
BERNOULLI	Urban100	img_094_SRF_2_HR	180	0.899476	29.0652
BERNOULLI	Urban100	img_094_SRF_2_HR	190	0.883773	28.312
BERNOULLI	Urban100	img_094_SRF_2_HR	200	0.862098	27.4663
BERNOULLI	Urban100	img_094_SRF_2_HR	210	0.837361	26.5091
BERNOULLI	Urban100	img_094_SRF_2_HR	220	0.801828	25.4191
BERNOULLI	Urban100	img_094_SRF_2_HR	230	0.750635	24.2989
BERNOULLI	Urban100	img_094_SRF_2_HR	240	0.662429	22.7044
BERNOULLI	Urban100	img_021_SRF_2_HR	150	0.921482	31.8788
BERNOULLI	Urban100	img_021_SRF_2_HR	160	0.912393	31.187
BERNOULLI	Urban100	img_021_SRF_2_HR	170	0.901332	30.515
BERNOULLI	Urban100	img_021_SRF_2_HR	180	0.886769	29.685
BERNOULLI	Urban100	img_021_SRF_2_HR	190	0.873384	29.0217
BERNOULLI	Urban100	img_021_SRF_2_HR	200	0.852201	28.0254
BERNOULLI	Urban100	img_021_SRF_2_HR	210	0.827721	26.9794
BERNOULLI	Urban100	img_021_SRF_2_HR	220	0.794892	25.8745
BERNOULLI	Urban100	img_021_SRF_2_HR	230	0.749944	24.6779
BERNOULLI	Urban100	img_021_SRF_2_HR	240	0.671108	22.9915
BERNOULLI	Urban100	img_071_SRF_2_HR	150	0.896947	31.0733
BERNOULLI	Urban100	img_071_SRF_2_HR	160	0.88215	30.3973
BERNOULLI	Urban100	img_071_SRF_2_HR	170	0.865543	29.7113
BERNOULLI	Urban100	img_071_SRF_2_HR	180	0.845396	29.1109
BERNOULLI	Urban100	img_071_SRF_2_HR	190	0.82018	28.3788
BERNOULLI	Urban100	img_071_SRF_2_HR	200	0.791698	27.5803
BERNOULLI	Urban100	img_071_SRF_2_HR	210	0.754005	26.7488
BERNOULLI	Urban100	img_071_SRF_2_HR	220	0.70266	25.977
BERNOULLI	Urban100	img_071_SRF_2_HR	230	0.640053	24.9312
BERNOULLI	Urban100	img_071_SRF_2_HR	240	0.546162	23.8673
BERNOULLI	Urban100	img_098_SRF_2_HR	150	0.835929	25.1447
BERNOULLI	Urban100	img_098_SRF_2_HR	160	0.812918	24.5581
BERNOULLI	Urban100	img_098_SRF_2_HR	170	0.787052	23.9836
BERNOULLI	Urban100	img_098_SRF_2_HR	180	0.757663	23.4023
BERNOULLI	Urban100	img_098_SRF_2_HR	190	0.725154	22.78
BERNOULLI	Urban100	img_098_SRF_2_HR	200	0.686344	22.1639
BERNOULLI	Urban100	img_098_SRF_2_HR	210	0.634313	21.416
BERNOULLI	Urban100	img_098_SRF_2_HR	220	0.575347	20.7881
BERNOULLI	Urban100	img_098_SRF_2_HR	230	0.504565	19.9162
BERNOULLI	Urban100	img_098_SRF_2_HR	240	0.401369	18.9848
BERNOULLI	Urban100	img_062_SRF_2_HR	150	0.887509	24.0392
BERNOULLI	Urban100	img_062_SRF_2_HR	160	0.869184	23.3936
BERNOULLI	Urban100	img_062_SRF_2_HR	170	0.851075	22.6088
BERNOULLI	Urban100	img_062_SRF_2_HR	180	0.828054	22.0053
BERNOULLI	Urban100	img_062_SRF_2_HR	190	0.80202	21.2901
BERNOULLI	Urban100	img_062_SRF_2_HR	200	0.764937	20.5877
BERNOULLI	Urban100	img_062_SRF_2_HR	210	0.727716	19.8624
BERNOULLI	Urban100	img_062_SRF_2_HR	220	0.671363	19.0086
BERNOULLI	Urban100	img_062_SRF_2_HR	230	0.603847	18.1383
BERNOULLI	Urban100	img_062_SRF_2_HR	240	0.521393	17.2505
BERNOULLI	Urban100	img_078_SRF_2_HR	150	0.886274	28.811
BERNOULLI	Urban100	img_078_SRF_2_HR	160	0.87048	28.0517
BERNOULLI	Urban100	img_078_SRF_2_HR	170	0.852922	27.4905
BERNOULLI	Urban100	img_078_SRF_2_HR	180	0.83092	26.8752
BERNOULLI	Urban100	img_078_SRF_2_HR	190	0.8102	26.3368
BERNOULLI	Urban100	img_078_SRF_2_HR	200	0.775717	25.4672
BERNOULLI	Urban100	img_078_SRF_2_HR	210	0.744125	24.9235
BERNOULLI	Urban100	img_078_SRF_2_HR	220	0.704041	24.0231
BERNOULLI	Urban100	img_078_SRF_2_HR	230	0.648835	23.365
BERNOULLI	Urban100	img_078_SRF_2_HR	240	0.578765	22.5696
BERNOULLI	Urban100	img_077_SRF_2_HR	150	0.885501	26.9749
BERNOULLI	Urban100	img_077_SRF_2_HR	160	0.871216	26.468
BERNOULLI	Urban100	img_077_SRF_2_HR	170	0.855017	25.8338
BERNOULLI	Urban100	img_077_SRF_2_HR	180	0.836281	25.4381
BERNOULLI	Urban100	img_077_SRF_2_HR	190	0.811094	24.7295
BERNOULLI	Urban100	img_077_SRF_2_HR	200	0.786264	24.1535
BERNOULLI	Urban100	img_077_SRF_2_HR	210	0.756114	23.5337
BERNOULLI	Urban100	img_077_SRF_2_HR	220	0.719144	22.8647
BERNOULLI	Urban100	img_077_SRF_2_HR	230	0.665894	22.0284
BERNOULLI	Urban100	img_077_SRF_2_HR	240	0.587163	20.827
BERNOULLI	Urban100	img_088_SRF_2_HR	150	0.861076	23.1352
BERNOULLI	Urban100	img_088_SRF_2_HR	160	0.842761	22.6577
BERNOULLI	Urban100	img_088_SRF_2_HR	170	0.819431	22.0699
BERNOULLI	Urban100	img_088_SRF_2_HR	180	0.790942	21.3663
BERNOULLI	Urban100	img_088_SRF_2_HR	190	0.765027	20.8757
BERNOULLI	Urban100	img_088_SRF_2_HR	200	0.722446	20.2367
BERNOULLI	Urban100	img_088_SRF_2_HR	210	0.675644	19.4703
BERNOULLI	Urban100	img_088_SRF_2_HR	220	0.619642	18.7286
BERNOULLI	Urban100	img_088_SRF_2_HR	230	0.525864	17.6625
BERNOULLI	Urban100	img_088_SRF_2_HR	240	0.411464	16.5508
BERNOULLI	Urban100	img_090_SRF_2_HR	150	0.977574	36.5365
BERNOULLI	Urban100	img_090_SRF_2_HR	160	0.974273	35.3765
BERNOULLI	Urban100	img_090_SRF_2_HR	170	0.969556	34.4826
BERNOULLI	Urban100	img_090_SRF_2_HR	180	0.9641	33.4835
BERNOULLI	Urban100	img_090_SRF_2_HR	190	0.955971	32.4795
BERNOULLI	Urban100	img_090_SRF_2_HR	200	0.941649	31.3972
BERNOULLI	Urban100	img_090_SRF_2_HR	210	0.921092	29.9092
BERNOULLI	Urban100	img_090_SRF_2_HR	220	0.888709	28.6174
BERNOULLI	Urban100	img_090_SRF_2_HR	230	0.832328	26.8102
BERNOULLI	Urban100	img_090_SRF_2_HR	240	0.737016	25.0405
BERNOULLI	Urban100	img_033_SRF_2_HR	150	0.905923	30.2127
BERNOULLI	Urban100	img_033_SRF_2_HR	160	0.895248	29.6634
BERNOULLI	Urban100	img_033_SRF_2_HR	170	0.875836	28.661
BERNOULLI	Urban100	img_033_SRF_2_HR	180	0.860814	27.9796
BERNOULLI	Urban100	img_033_SRF_2_HR	190	0.837211	27.0877
BERNOULLI	Urban100	img_033_SRF_2_HR	200	0.813281	26.3203
BERNOULLI	Urban100	img_033_SRF_2_HR	210	0.776794	25.2082
BERNOULLI	Urban100	img_033_SRF_2_HR	220	0.738169	24.4323
BERNOULLI	Urban100	img_033_SRF_2_HR	230	0.675313	23.0752
BERNOULLI	Urban100	img_033_SRF_2_HR	240	0.609318	21.7671
BERNOULLI	Urban100	img_024_SRF_2_HR	150	0.930703	25.3094
BERNOULLI	Urban100	img_024_SRF_2_HR	160	0.916599	24.6102
BERNOULLI	Urban100	img_024_SRF_2_HR	170	0.900273	23.6498
BERNOULLI	Urban100	img_024_SRF_2_HR	180	0.882238	22.9799
BERNOULLI	Urban100	img_024_SRF_2_HR	190	0.852087	21.8052
BERNOULLI	Urban100	img_024_SRF_2_HR	200	0.821112	20.9091
BERNOULLI	Urban100	img_024_SRF_2_HR	210	0.770523	19.7114
BERNOULLI	Urban100	img_024_SRF_2_HR	220	0.704099	18.5359
BERNOULLI	Urban100	img_024_SRF_2_HR	230	0.60123	17.0226
BERNOULLI	Urban100	img_024_SRF_2_HR	240	0.463262	15.6203
BERNOULLI	Urban100	img_080_SRF_2_HR	150	0.963895	33.6188
BERNOULLI	Urban100	img_080_SRF_2_HR	160	0.95977	33.121
BERNOULLI	Urban100	img_080_SRF_2_HR	170	0.953981	32.6362
BERNOULLI	Urban100	img_080_SRF_2_HR	180	0.949422	32.0938
BERNOULLI	Urban100	img_080_SRF_2_HR	190	0.939408	31.6021
BERNOULLI	Urban100	img_080_SRF_2_HR	200	0.925568	30.8572
BERNOULLI	Urban100	img_080_SRF_2_HR	210	0.91482	30.2028
BERNOULLI	Urban100	img_080_SRF_2_HR	220	0.891612	29.2087
BERNOULLI	Urban100	img_080_SRF_2_HR	230	0.859737	28.1471
BERNOULLI	Urban100	img_080_SRF_2_HR	240	0.815319	26.8145
BERNOULLI	Urban100	img_051_SRF_2_HR	150	0.933713	28.6357
BERNOULLI	Urban100	img_051_SRF_2_HR	160	0.925108	28.0016
BERNOULLI	Urban100	img_051_SRF_2_HR	170	0.913557	27.4237
BERNOULLI	Urban100	img_051_SRF_2_HR	180	0.899071	26.7072
BERNOULLI	Urban100	img_051_SRF_2_HR	190	0.877115	25.7375
BERNOULLI	Urban100	img_051_SRF_2_HR	200	0.850643	24.8296
BERNOULLI	Urban100	img_051_SRF_2_HR	210	0.820108	23.9694
BERNOULLI	Urban100	img_051_SRF_2_HR	220	0.778691	23.0036
BERNOULLI	Urban100	img_051_SRF_2_HR	230	0.712925	21.7712
BERNOULLI	Urban100	img_051_SRF_2_HR	240	0.619486	20.5659
BERNOULLI	Urban100	img_005_SRF_2_HR	150	0.966571	28.3616
BERNOULLI	Urban100	img_005_SRF_2_HR	160	0.962646	27.6485
BERNOULLI	Urban100	img_005_SRF_2_HR	170	0.954596	26.5723
BERNOULLI	Urban100	img_005_SRF_2_HR	180	0.94595	25.7005
BERNOULLI	Urban100	img_005_SRF_2_HR	190	0.933527	24.6441
BERNOULLI	Urban100	img_005_SRF_2_HR	200	0.912604	23.2347
BERNOULLI	Urban100	img_005_SRF_2_HR	210	0.892925	22.18
BERNOULLI	Urban100	img_005_SRF_2_HR	220	0.857761	20.8463
BERNOULLI	Urban100	img_005_SRF_2_HR	230	0.810878	19.5773
BERNOULLI	Urban100	img_005_SRF_2_HR	240	0.719196	17.6307
BERNOULLI	Urban100	img_052_SRF_2_HR	150	0.949904	29.3515
BERNOULLI	Urban100	img_052_SRF_2_HR	160	0.94291	28.5454
BERNOULLI	Urban100	img_052_SRF_2_HR	170	0.929239	27.8108
BERNOULLI	Urban100	img_052_SRF_2_HR	180	0.916503	26.778
BERNOULLI	Urban100	img_052_SRF_2_HR	190	0.899359	25.8633
BERNOULLI	Urban100	img_052_SRF_2_HR	200	0.880967	24.893
BERNOULLI	Urban100	img_052_SRF_2_HR	210	0.847018	23.6492
BERNOULLI	Urban100	img_052_SRF_2_HR	220	0.804411	22.389
BERNOULLI	Urban100	img_052_SRF_2_HR	230	0.74644	21.1303
BERNOULLI	Urban100	img_052_SRF_2_HR	240	0.633664	19.1506
BERNOULLI	Urban100	img_083_SRF_2_HR	150	0.908497	26.2158
BERNOULLI	Urban100	img_083_SRF_2_HR	160	0.895775	25.6399
BERNOULLI	Urban100	img_083_SRF_2_HR	170	0.87793	24.8845
BERNOULLI	Urban100	img_083_SRF_2_HR	180	0.854879	24.1148
BERNOULLI	Urban100	img_083_SRF_2_HR	190	0.830971	23.3806
BERNOULLI	Urban100	img_083_SRF_2_HR	200	0.799222	22.5304
BERNOULLI	Urban100	img_083_SRF_2_HR	210	0.757253	21.6261
BERNOULLI	Urban100	img_083_SRF_2_HR	220	0.703257	20.6934
BERNOULLI	Urban100	img_083_SRF_2_HR	230	0.622466	19.4837
BERNOULLI	Urban100	img_083_SRF_2_HR	240	0.515677	18.1273
BERNOULLI	Urban100	img_050_SRF_2_HR	150	0.882532	26.5762
BERNOULLI	Urban100	img_050_SRF_2_HR	160	0.869273	25.9597
BERNOULLI	Urban100	img_050_SRF_2_HR	170	0.854306	25.3989
BERNOULLI	Urban100	img_050_SRF_2_HR	180	0.834479	24.7786
BERNOULLI	Urban100	img_050_SRF_2_HR	190	0.812342	24.1811
BERNOULLI	Urban100	img_050_SRF_2_HR	200	0.784413	23.418
BERNOULLI	Urban100	img_050_SRF_2_HR	210	0.747707	22.7569
BERNOULLI	Urban100	img_050_SRF_2_HR	220	0.709426	22.0222
BERNOULLI	Urban100	img_050_SRF_2_HR	230	0.652846	21.2401
BERNOULLI	Urban100	img_050_SRF_2_HR	240	0.583235	20.3815
BERNOULLI	Urban100	img_066_SRF_2_HR	150	0.908667	27.3656
BERNOULLI	Urban100	img_066_SRF_2_HR	160	0.896289	26.7202
BERNOULLI	Urban100	img_066_SRF_2_HR	170	0.880094	25.9679
BERNOULLI	Urban100	img_066_SRF_2_HR	180	0.864552	25.3215
BERNOULLI	Urban100	img_066_SRF_2_HR	190	0.844187	24.7487
BERNOULLI	Urban100	img_066_SRF_2_HR	200	0.814524	23.9004
BERNOULLI	Urban100	img_066_SRF_2_HR	210	0.782301	23.0715
BERNOULLI	Urban100	img_066_SRF_2_HR	220	0.741469	22.2802
BERNOULLI	Urban100	img_066_SRF_2_HR	230	0.67575	21.1965
BERNOULLI	Urban100	img_066_SRF_2_HR	240	0.577733	19.946
BERNOULLI	Urban100	img_001_SRF_2_HR	150	0.92968	31.2039
BERNOULLI	Urban100	img_001_SRF_2_HR	160	0.921505	30.5662
BERNOULLI	Urban100	img_001_SRF_2_HR	170	0.907636	29.5661
BERNOULLI	Urban100	img_001_SRF_2_HR	180	0.897137	28.8879
BERNOULLI	Urban100	img_001_SRF_2_HR	190	0.878202	27.9454
BERNOULLI	Urban100	img_001_SRF_2_HR	200	0.858485	27.0916
BERNOULLI	Urban100	img_001_SRF_2_HR	210	0.830029	25.9609
BERNOULLI	Urban100	img_001_SRF_2_HR	220	0.793626	24.7127
BERNOULLI	Urban100	img_001_SRF_2_HR	230	0.734545	23.1398
BERNOULLI	Urban100	img_001_SRF_2_HR	240	0.65117	21.7464
BERNOULLI	Urban100	img_097_SRF_2_HR	150	0.940163	28.6277
BERNOULLI	Urban100	img_097_SRF_2_HR	160	0.926937	27.6419
BERNOULLI	Urban100	img_097_SRF_2_HR	170	0.918191	27.1539
BERNOULLI	Urban100	img_097_SRF_2_HR	180	0.899707	26.1989
BERNOULLI	Urban100	img_097_SRF_2_HR	190	0.880661	25.4472
BERNOULLI	Urban100	img_097_SRF_2_HR	200	0.860086	24.6071
BERNOULLI	Urban100	img_097_SRF_2_HR	210	0.829161	23.7595
BERNOULLI	Urban100	img_097_SRF_2_HR	220	0.780471	22.6202
BERNOULLI	Urban100	img_097_SRF_2_HR	230	0.719949	21.6168
BERNOULLI	Urban100	img_097_SRF_2_HR	240	0.624138	20.18
BERNOULLI	Urban100	img_089_SRF_2_HR	150	0.901034	29.5091
BERNOULLI	Urban100	img_089_SRF_2_HR	160	0.884785	28.9157
BERNOULLI	Urban100	img_089_SRF_2_HR	170	0.868366	28.3204
BERNOULLI	Urban100	img_089_SRF_2_HR	180	0.84797	27.7025
BERNOULLI	Urban100	img_089_SRF_2_HR	190	0.823408	27.0823
BERNOULLI	Urban100	img_089_SRF_2_HR	200	0.793948	26.3005
BERNOULLI	Urban100	img_089_SRF_2_HR	210	0.757179	25.5173
BERNOULLI	Urban100	img_089_SRF_2_HR	220	0.709011	24.5973
BERNOULLI	Urban100	img_089_SRF_2_HR	230	0.650058	23.5257
BERNOULLI	Urban100	img_089_SRF_2_HR	240	0.563707	22.1996
BERNOULLI	Urban100	img_023_SRF_2_HR	150	0.737176	7.76782
BERNOULLI	Urban100	img_023_SRF_2_HR	160	0.733073	7.74288
BERNOULLI	Urban100	img_023_SRF_2_HR	170	0.724613	7.73337
BERNOULLI	Urban100	img_023_SRF_2_HR	180	0.717606	7.84261
BERNOULLI	Urban100	img_023_SRF_2_HR	190	0.70631	7.99915
BERNOULLI	Urban100	img_023_SRF_2_HR	200	0.691273	8.3331
BERNOULLI	Urban100	img_023_SRF_2_HR	210	0.666238	8.66344
BERNOULLI	Urban100	img_023_SRF_2_HR	220	0.627216	9.34173
BERNOULLI	Urban100	img_023_SRF_2_HR	230	0.547926	10.1248
BERNOULLI	Urban100	img_023_SRF_2_HR	240	0.419566	10.7364
BERNOULLI	Urban100	img_022_SRF_2_HR	150	0.935867	30.4139
BERNOULLI	Urban100	img_022_SRF_2_HR	160	0.925785	29.7377
BERNOULLI	Urban100	img_022_SRF_2_HR	170	0.911756	29.1163
BERNOULLI	Urban100	img_022_SRF_2_HR	180	0.897479	28.3421
BERNOULLI	Urban100	img_022_SRF_2_HR	190	0.883707	27.7478
BERNOULLI	Urban100	img_022_SRF_2_HR	200	0.861215	26.9604
BERNOULLI	Urban100	img_022_SRF_2_HR	210	0.833766	26.1978
BERNOULLI	Urban100	img_022_SRF_2_HR	220	0.807713	25.454
BERNOULLI	Urban100	img_022_SRF_2_HR	230	0.757472	24.4775
BERNOULLI	Urban100	img_022_SRF_2_HR	240	0.691409	23.2222
BERNOULLI	Urban100	img_055_SRF_2_HR	150	0.96292	33.5172
BERNOULLI	Urban100	img_055_SRF_2_HR	160	0.957325	32.729
BERNOULLI	Urban100	img_055_SRF_2_HR	170	0.952873	31.6639
BERNOULLI	Urban100	img_055_SRF_2_HR	180	0.942568	30.5257
BERNOULLI	Urban100	img_055_SRF_2_HR	190	0.928748	29.0948
BERNOULLI	Urban100	img_055_SRF_2_HR	200	0.90901	27.4898
BERNOULLI	Urban100	img_055_SRF_2_HR	210	0.885467	26.2274
BERNOULLI	Urban100	img_055_SRF_2_HR	220	0.845235	24.3779
BERNOULLI	Urban100	img_055_SRF_2_HR	230	0.773719	22.4008
BERNOULLI	Urban100	img_055_SRF_2_HR	240	0.652929	20.1303
BERNOULLI	Urban100	img_038_SRF_2_HR	150	0.861269	30.017
BERNOULLI	Urban100	img_038_SRF_2_HR	160	0.838491	29.2718
BERNOULLI	Urban100	img_038_SRF_2_HR	170	0.814982	28.601
BERNOULLI	Urban100	img_038_SRF_2_HR	180	0.785179	27.9321
BERNOULLI	Urban100	img_038_SRF_2_HR	190	0.754467	27.406
BERNOULLI	Urban100	img_038_SRF_2_HR	200	0.7098	26.5332
BERNOULLI	Urban100	img_038_SRF_2_HR	210	0.666334	25.8208
BERNOULLI	Urban100	img_038_SRF_2_HR	220	0.608768	25.0266
BERNOULLI	Urban100	img_038_SRF_2_HR	230	0.538994	24.1963
BERNOULLI	Urban100	img_038_SRF_2_HR	240	0.459532	23.2219
BERNOULLI	Urban100	img_013_SRF_2_HR	150	0.943417	30.8969
BERNOULLI	Urban100	img_013_SRF_2_HR	160	0.93496	30.0463
BERNOULLI	Urban100	img_013_SRF_2_HR	170	0.925298	29.4231
BERNOULLI	Urban100	img_013_SRF_2_HR	180	0.913714	28.6274
BERNOULLI	Urban100	img_013_SRF_2_HR	190	0.894873	27.6063
BERNOULLI	Urban100	img_013_SRF_2_HR	200	0.874008	26.6474
BERNOULLI	Urban100	img_013_SRF_2_HR	210	0.845692	25.4442
BERNOULLI	Urban100	img_013_SRF_2_HR	220	0.811778	24.5352
BERNOULLI	Urban100	img_013_SRF_2_HR	230	0.749934	22.9846
BERNOULLI	Urban100	img_013_SRF_2_HR	240	0.660231	21.2755
BERNOULLI	Urban100	img_046_SRF_2_HR	150	0.918151	28.7536
BERNOULLI	Urban100	img_046_SRF_2_HR	160	0.904729	27.9797
BERNOULLI	Urban100	img_046_SRF_2_HR	170	0.895171	27.6411
BERNOULLI	Urban100	img_046_SRF_2_HR	180	0.87748	26.9412
BERNOULLI	Urban100	img_046_SRF_2_HR	190	0.858799	26.2218
BERNOULLI	Urban100	img_046_SRF_2_HR	200	0.836382	25.5547
BERNOULLI	Urban100	img_046_SRF_2_HR	210	0.810398	24.993
BERNOULLI	Urban100	img_046_SRF_2_HR	220	0.769332	23.9582
BERNOULLI	Urban100	img_046_SRF_2_HR	230	0.726503	23.2159
BERNOULLI	Urban100	img_046_SRF_2_HR	240	0.663448	22.1742
BERNOULLI	Urban100	img_091_SRF_2_HR	150	0.881466	25.8079
BERNOULLI	Urban100	img_091_SRF_2_HR	160	0.86269	25.2456
BERNOULLI	Urban100	img_091_SRF_2_HR	170	0.840663	24.553
BERNOULLI	Urban100	img_091_SRF_2_HR	180	0.818146	23.9691
BERNOULLI	Urban100	img_091_SRF_2_HR	190	0.792269	23.4127
BERNOULLI	Urban100	img_091_SRF_2_HR	200	0.750842	22.5868
BERNOULLI	Urban100	img_091_SRF_2_HR	210	0.705998	21.7769
BERNOULLI	Urban100	img_091_SRF_2_HR	220	0.646968	20.9479
BERNOULLI	Urban100	img_091_SRF_2_HR	230	0.576151	20.0429
BERNOULLI	Urban100	img_091_SRF_2_HR	240	0.45524	18.7941
BERNOULLI	Urban100	img_092_SRF_2_HR	150	0.888923	23.9143
BERNOULLI	Urban100	img_092_SRF_2_HR	160	0.869617	23.0944
BERNOULLI	Urban100	img_092_SRF_2_HR	170	0.846393	22.3099
BERNOULLI	Urban100	img_092_SRF_2_HR	180	0.816434	21.3862
BERNOULLI	Urban100	img_092_SRF_2_HR	190	0.783978	20.639
BERNOULLI	Urban100	img_092_SRF_2_HR	200	0.742341	19.7004
BERNOULLI	Urban100	img_092_SRF_2_HR	210	0.699241	18.9696
BERNOULLI	Urban100	img_092_SRF_2_HR	220	0.626712	17.8464
BERNOULLI	Urban100	img_092_SRF_2_HR	230	0.564601	17.0735
BERNOULLI	Urban100	img_092_SRF_2_HR	240	0.480645	16.1795
BERNOULLI	Urban100	img_035_SRF_2_HR	150	0.957088	30.0242
BERNOULLI	Urban100	img_035_SRF_2_HR	160	0.950071	29.2486
BERNOULLI	Urban100	img_035_SRF_2_HR	170	0.941466	28.664
BERNOULLI	Urban100	img_035_SRF_2_HR	180	0.926357	27.5222
BERNOULLI	Urban100	img_035_SRF_2_HR	190	0.912997	26.5685
BERNOULLI	Urban100	img_035_SRF_2_HR	200	0.891791	25.3996
BERNOULLI	Urban100	img_035_SRF_2_HR	210	0.865017	24.31
BERNOULLI	Urban100	img_035_SRF_2_HR	220	0.821726	22.984
BERNOULLI	Urban100	img_035_SRF_2_HR	230	0.764673	21.5339
BERNOULLI	Urban100	img_035_SRF_2_HR	240	0.673646	19.7712
BERNOULLI	Urban100	img_081_SRF_2_HR	150	0.944791	25.8053
BERNOULLI	Urban100	img_081_SRF_2_HR	160	0.939148	25.3281
BERNOULLI	Urban100	img_081_SRF_2_HR	170	0.93518	24.9739
BERNOULLI	Urban100	img_081_SRF_2_HR	180	0.929373	24.8857
BERNOULLI	Urban100	img_081_SRF_2_HR	190	0.921919	24.2632
BERNOULLI	Urban100	img_081_SRF_2_HR	200	0.911996	23.8877
BERNOULLI	Urban100	img_081_SRF_2_HR	210	0.892389	23.3978
BERNOULLI	Urban100	img_081_SRF_2_HR	220	0.867313	22.1615
BERNOULLI	Urban100	img_081_SRF_2_HR	230	0.817707	21.1014
BERNOULLI	Urban100	img_081_SRF_2_HR	240	0.729257	19.3068
BERNOULLI	Urban100	img_054_SRF_2_HR	150	0.920955	26.2216
BERNOULLI	Urban100	img_054_SRF_2_HR	160	0.908796	25.5227
BERNOULLI	Urban100	img_054_SRF_2_HR	170	0.893045	24.7528
BERNOULLI	Urban100	img_054_SRF_2_HR	180	0.87508	24.0355
BERNOULLI	Urban100	img_054_SRF_2_HR	190	0.856137	23.3632
BERNOULLI	Urban100	img_054_SRF_2_HR	200	0.826075	22.5245
BERNOULLI	Urban100	img_054_SRF_2_HR	210	0.786637	21.6534
BERNOULLI	Urban100	img_054_SRF_2_HR	220	0.739417	20.6574
BERNOULLI	Urban100	img_054_SRF_2_HR	230	0.664015	19.5283
BERNOULLI	Urban100	img_054_SRF_2_HR	240	0.554725	18.2946
BERNOULLI	Urban100	img_085_SRF_2_HR	150	0.962768	30.5369
BERNOULLI	Urban100	img_085_SRF_2_HR	160	0.956647	29.8218
BERNOULLI	Urban100	img_085_SRF_2_HR	170	0.950019	28.9894
BERNOULLI	Urban100	img_085_SRF_2_HR	180	0.942731	28.1313
BERNOULLI	Urban100	img_085_SRF_2_HR	190	0.932428	27.3971
BERNOULLI	Urban100	img_085_SRF_2_HR	200	0.91952	26.4235
BERNOULLI	Urban100	img_085_SRF_2_HR	210	0.902553	25.5782
BERNOULLI	Urban100	img_085_SRF_2_HR	220	0.875427	24.4168
BERNOULLI	Urban100	img_085_SRF_2_HR	230	0.836168	23.0345
BERNOULLI	Urban100	img_085_SRF_2_HR	240	0.774843	21.6614
BERNOULLI	Urban100	img_009_SRF_2_HR	150	0.955397	32.4135
BERNOULLI	Urban100	img_009_SRF_2_HR	160	0.947101	31.6505
BERNOULLI	Urban100	img_009_SRF_2_HR	170	0.938825	31.0847
BERNOULLI	Urban100	img_009_SRF_2_HR	180	0.930268	30.4002
BERNOULLI	Urban100	img_009_SRF_2_HR	190	0.917714	29.596
BERNOULLI	Urban100	img_009_SRF_2_HR	200	0.899209	28.7451
BERNOULLI	Urban100	img_009_SRF_2_HR	210	0.875562	27.977
BERNOULLI	Urban100	img_009_SRF_2_HR	220	0.845129	26.9069
BERNOULLI	Urban100	img_009_SRF_2_HR	230	0.803797	26.0957
BERNOULLI	Urban100	img_009_SRF_2_HR	240	0.757068	25.2842
BERNOULLI	Urban100	img_068_SRF_2_HR	150	0.948208	31.9242
BERNOULLI	Urban100	img_068_SRF_2_HR	160	0.9406	31.1982
BERNOULLI	Urban100	img_068_SRF_2_HR	170	0.929182	30.3568
BERNOULLI	Urban100	img_068_SRF_2_HR	180	0.914426	29.4803
BERNOULLI	Urban100	img_068_SRF_2_HR	190	0.893221	28.3921
BERNOULLI	Urban100	img_068_SRF_2_HR	200	0.869776	27.511
BERNOULLI	Urban100	img_068_SRF_2_HR	210	0.834281	26.3147
BERNOULLI	Urban100	img_068_SRF_2_HR	220	0.79082	25.1783
BERNOULLI	Urban100	img_068_SRF_2_HR	230	0.723216	23.7513
BERNOULLI	Urban100	img_068_SRF_2_HR	240	0.626319	22.205
BERNOULLI	Urban100	img_025_SRF_2_HR	150	0.966329	33.7808
BERNOULLI	Urban100	img_025_SRF_2_HR	160	0.962985	33.1775
BERNOULLI	Urban100	img_025_SRF_2_HR	170	0.957352	32.246
BERNOULLI	Urban100	img_025_SRF_2_HR	180	0.949731	31.2272
BERNOULLI	Urban100	img_025_SRF_2_HR	190	0.942494	30.4187
BERNOULLI	Urban100	img_025_SRF_2_HR	200	0.929751	29.3525
BERNOULLI	Urban100	img_025_SRF_2_HR	210	0.914255	27.8949
BERNOULLI	Urban100	img_025_SRF_2_HR	220	0.892195	26.4207
BERNOULLI	Urban100	img_025_SRF_2_HR	230	0.847976	24.0059
BERNOULLI	Urban100	img_025_SRF_2_HR	240	0.772015	21.506
BERNOULLI	Urban100	img_095_SRF_2_HR	150	0.820768	24.8568
BERNOULLI	Urban100	img_095_SRF_2_HR	160	0.792517	24.2418
BERNOULLI	Urban100	img_095_SRF_2_HR	170	0.76417	23.7007
BERNOULLI	Urban100	img_095_SRF_2_HR	180	0.729701	23.0413
BERNOULLI	Urban100	img_095_SRF_2_HR	190	0.687343	22.355
BERNOULLI	Urban100	img_095_SRF_2_HR	200	0.64646	21.7543
BERNOULLI	Urban100	img_095_SRF_2_HR	210	0.588782	20.9737
BERNOULLI	Urban100	img_095_SRF_2_HR	220	0.519378	20.3299
BERNOULLI	Urban100	img_095_SRF_2_HR	230	0.448624	19.6019
BERNOULLI	Urban100	img_095_SRF_2_HR	240	0.338026	18.537
BERNOULLI	Urban100	img_040_SRF_2_HR	150	0.982008	29.0205
BERNOULLI	Urban100	img_040_SRF_2_HR	160	0.978452	28.0288
BERNOULLI	Urban100	img_040_SRF_2_HR	170	0.973726	27.0423
BERNOULLI	Urban100	img_040_SRF_2_HR	180	0.966114	25.6982
BERNOULLI	Urban100	img_040_SRF_2_HR	190	0.957728	24.7087
BERNOULLI	Urban100	img_040_SRF_2_HR	200	0.944258	23.3061
BERNOULLI	Urban100	img_040_SRF_2_HR	210	0.922318	21.7462
BERNOULLI	Urban100	img_040_SRF_2_HR	220	0.894237	20.2575
BERNOULLI	Urban100	img_040_SRF_2_HR	230	0.842522	18.4497
BERNOULLI	Urban100	img_040_SRF_2_HR	240	0.733949	15.8535
BERNOULLI	Urban100	img_070_SRF_2_HR	150	0.885396	27.9501
BERNOULLI	Urban100	img_070_SRF_2_HR	160	0.871381	27.4406
BERNOULLI	Urban100	img_070_SRF_2_HR	170	0.852822	26.768
BERNOULLI	Urban100	img_070_SRF_2_HR	180	0.831555	26.1376
BERNOULLI	Urban100	img_070_SRF_2_HR	190	0.808868	25.6036
BERNOULLI	Urban100	img_070_SRF_2_HR	200	0.781382	24.8879
BERNOULLI	Urban100	img_070_SRF_2_HR	210	0.748244	24.2382
BERNOULLI	Urban100	img_070_SRF_2_HR	220	0.707683	23.4388
BERNOULLI	Urban100	img_070_SRF_2_HR	230	0.653361	22.579
BERNOULLI	Urban100	img_070_SRF_2_HR	240	0.570073	21.4084
BERNOULLI	Urban100	img_042_SRF_2_HR	150	0.952807	29.8931
BERNOULLI	Urban100	img_042_SRF_2_HR	160	0.944475	29.0588
BERNOULLI	Urban100	img_042_SRF_2_HR	170	0.936298	28.1971
BERNOULLI	Urban100	img_042_SRF_2_HR	180	0.923985	27.3289
BERNOULLI	Urban100	img_042_SRF_2_HR	190	0.906797	26.4233
BERNOULLI	Urban100	img_042_SRF_2_HR	200	0.886905	25.0419
BERNOULLI	Urban100	img_042_SRF_2_HR	210	0.858586	23.9768
BERNOULLI	Urban100	img_042_SRF_2_HR	220	0.816064	22.6373
BERNOULLI	Urban100	img_042_SRF_2_HR	230	0.761703	21.2685
BERNOULLI	Urban100	img_042_SRF_2_HR	240	0.655484	19.3584
BERNOULLI	Urban100	img_056_SRF_2_HR	150	0.92106	27.2836
BERNOULLI	Urban100	img_056_SRF_2_HR	160	0.906917	26.4287
BERNOULLI	Urban100	img_056_SRF_2_HR	170	0.89171	25.6807
BERNOULLI	Urban100	img_056_SRF_2_HR	180	0.87224	24.8561
BERNOULLI	Urban100	img_056_SRF_2_HR	190	0.848721	24.0682
BERNOULLI	Urban100	img_056_SRF_2_HR	200	0.818723	23.2024
BERNOULLI	Urban100	img_056_SRF_2_HR	210	0.777396	22.1352
BERNOULLI	Urban100	img_056_SRF_2_HR	220	0.726913	20.9859
BERNOULLI	Urban100	img_056_SRF_2_HR	230	0.652387	19.7733
BERNOULLI	Urban100	img_056_SRF_2_HR	240	0.540481	18.2102
BERNOULLI	Urban100	img_053_SRF_2_HR	150	0.932195	25.6601
BERNOULLI	Urban100	img_053_SRF_2_HR	160	0.918669	24.8029
BERNOULLI	Urban100	img_053_SRF_2_HR	170	0.90449	24.065
BERNOULLI	Urban100	img_053_SRF_2_HR	180	0.888105	23.3161
BERNOULLI	Urban100	img_053_SRF_2_HR	190	0.866373	22.433
BERNOULLI	Urban100	img_053_SRF_2_HR	200	0.83281	21.3073
BERNOULLI	Urban100	img_053_SRF_2_HR	210	0.798573	20.4911
BERNOULLI	Urban100	img_053_SRF_2_HR	220	0.744609	19.3015
BERNOULLI	Urban100	img_053_SRF_2_HR	230	0.673401	18.1109
BERNOULLI	Urban100	img_053_SRF_2_HR	240	0.546083	16.4185
BERNOULLI	Urban100	img_027_SRF_2_HR	150	0.948063	32.715
BERNOULLI	Urban100	img_027_SRF_2_HR	160	0.940591	32.083
BERNOULLI	Urban100	img_027_SRF_2_HR	170	0.932726	31.5102
BERNOULLI	Urban100	img_027_SRF_2_HR	180	0.921644	30.7589
BERNOULLI	Urban100	img_027_SRF_2_HR	190	0.909075	30.117
BERNOULLI	Urban100	img_027_SRF_2_HR	200	0.88878	29.1415
BERNOULLI	Urban100	img_027_SRF_2_HR	210	0.870587	28.2387
BERNOULLI	Urban100	img_027_SRF_2_HR	220	0.837036	27.1583
BERNOULLI	Urban100	img_027_SRF_2_HR	230	0.789012	25.6903
BERNOULLI	Urban100	img_027_SRF_2_HR	240	0.71609	24.2297
BERNOULLI	Urban100	img_100_SRF_2_HR	150	0.922534	29.7788
BERNOULLI	Urban100	img_100_SRF_2_HR	160	0.910626	28.7758
BERNOULLI	Urban100	img_100_SRF_2_HR	170	0.90149	28.1253
BERNOULLI	Urban100	img_100_SRF_2_HR	180	0.887183	27.3299
BERNOULLI	Urban100	img_100_SRF_2_HR	190	0.869325	25.9594
BERNOULLI	Urban100	img_100_SRF_2_HR	200	0.842984	24.625
BERNOULLI	Urban100	img_100_SRF_2_HR	210	0.820105	23.6581
BERNOULLI	Urban100	img_100_SRF_2_HR	220	0.782137	22.1685
BERNOULLI	Urban100	img_100_SRF_2_HR	230	0.725326	20.2002
BERNOULLI	Urban100	img_100_SRF_2_HR	240	0.629623	17.8186
BERNOULLI	Urban100	img_063_SRF_2_HR	150	0.901596	24.0987
BERNOULLI	Urban100	img_063_SRF_2_HR	160	0.88553	23.3117
BERNOULLI	Urban100	img_063_SRF_2_HR	170	0.867595	22.4062
BERNOULLI	Urban100	img_063_SRF_2_HR	180	0.847089	21.4875
BERNOULLI	Urban100	img_063_SRF_2_HR	190	0.823239	20.5648
BERNOULLI	Urban100	img_063_SRF_2_HR	200	0.782576	19.4231
BERNOULLI	Urban100	img_063_SRF_2_HR	210	0.745906	18.6213
BERNOULLI	Urban100	img_063_SRF_2_HR	220	0.68269	17.3731
BERNOULLI	Urban100	img_063_SRF_2_HR	230	0.606283	16.2825
BERNOULLI	Urban100	img_063_SRF_2_HR	240	0.508835	15.1698
BERNOULLI	Urban100	img_036_SRF_2_HR	150	0.959577	31.4407
BERNOULLI	Urban100	img_036_SRF_2_HR	160	0.951881	30.4549
BERNOULLI	Urban100	img_036_SRF_2_HR	170	0.941123	29.4475
BERNOULLI	Urban100	img_036_SRF_2_HR	180	0.929578	28.5436
BERNOULLI	Urban100	img_036_SRF_2_HR	190	0.917725	27.6142
BERNOULLI	Urban100	img_036_SRF_2_HR	200	0.897607	26.3525
BERNOULLI	Urban100	img_036_SRF_2_HR	210	0.869131	25.0806
BERNOULLI	Urban100	img_036_SRF_2_HR	220	0.829365	23.5967
BERNOULLI	Urban100	img_036_SRF_2_HR	230	0.776105	22.3578
BERNOULLI	Urban100	img_036_SRF_2_HR	240	0.682928	20.5182
BERNOULLI	Urban100	img_079_SRF_2_HR	150	0.923401	28.67
BERNOULLI	Urban100	img_079_SRF_2_HR	160	0.911297	27.9592
BERNOULLI	Urban100	img_079_SRF_2_HR	170	0.895498	27.3238
BERNOULLI	Urban100	img_079_SRF_2_HR	180	0.880993	26.7165
BERNOULLI	Urban100	img_079_SRF_2_HR	190	0.859074	25.9454
BERNOULLI	Urban100	img_079_SRF_2_HR	200	0.834025	25.2242
BERNOULLI	Urban100	img_079_SRF_2_HR	210	0.803989	24.3584
BERNOULLI	Urban100	img_079_SRF_2_HR	220	0.75524	23.335
BERNOULLI	Urban100	img_079_SRF_2_HR	230	0.693199	22.2945
BERNOULLI	Urban100	img_079_SRF_2_HR	240	0.583692	20.5606
BERNOULLI	Urban100	img_086_SRF_2_HR	150	0.954191	32.6552
BERNOULLI	Urban100	img_086_SRF_2_HR	160	0.946631	31.7276
BERNOULLI	Urban100	img_086_SRF_2_HR	170	0.94088	31.1621
BERNOULLI	Urban100	img_086_SRF_2_HR	180	0.932818	30.3783
BERNOULLI	Urban100	img_086_SRF_2_HR	190	0.923545	29.5702
BERNOULLI	Urban100	img_086_SRF_2_HR	200	0.907802	28.4795
BERNOULLI	Urban100	img_086_SRF_2_HR	210	0.89384	27.8236
BERNOULLI	Urban100	img_086_SRF_2_HR	220	0.86983	26.4479
BERNOULLI	Urban100	img_086_SRF_2_HR	230	0.834043	24.8855
BERNOULLI	Urban100	img_086_SRF_2_HR	240	0.777394	23.1706
BERNOULLI	Urban100	img_065_SRF_2_HR	150	0.934087	29.4505
BERNOULLI	Urban100	img_065_SRF_2_HR	160	0.923716	28.726
BERNOULLI	Urban100	img_065_SRF_2_HR	170	0.908614	27.9609
BERNOULLI	Urban100	img_065_SRF_2_HR	180	0.893787	27.3084
BERNOULLI	Urban100	img_065_SRF_2_HR	190	0.8717	26.4121
BERNOULLI	Urban100	img_065_SRF_2_HR	200	0.843648	25.4838
BERNOULLI	Urban100	img_065_SRF_2_HR	210	0.806218	24.493
BERNOULLI	Urban100	img_065_SRF_2_HR	220	0.753893	23.4083
BERNOULLI	Urban100	img_065_SRF_2_HR	230	0.68168	22.2091
BERNOULLI	Urban100	img_065_SRF_2_HR	240	0.557615	20.6244
BERNOULLI	Urban100	img_034_SRF_2_HR	150	0.8627	26.6709
BERNOULLI	Urban100	img_034_SRF_2_HR	160	0.844444	25.8526
BERNOULLI	Urban100	img_034_SRF_2_HR	170	0.826694	25.2595
BERNOULLI	Urban100	img_034_SRF_2_HR	180	0.804719	24.5235
BERNOULLI	Urban100	img_034_SRF_2_HR	190	0.778009	23.9096
BERNOULLI	Urban100	img_034_SRF_2_HR	200	0.744965	22.9613
BERNOULLI	Urban100	img_034_SRF_2_HR	210	0.70565	22.1437
BERNOULLI	Urban100	img_034_SRF_2_HR	220	0.658144	21.1164
BERNOULLI	Urban100	img_034_SRF_2_HR	230	0.59135	20.0597
BERNOULLI	Urban100	img_034_SRF_2_HR	240	0.498067	18.654
BERNOULLI	Urban100	img_099_SRF_2_HR	150	0.760189	11.5623
BERNOULLI	Urban100	img_099_SRF_2_HR	160	0.742495	11.5253
BERNOULLI	Urban100	img_099_SRF_2_HR	170	0.723894	11.5329
BERNOULLI	Urban100	img_099_SRF_2_HR	180	0.700518	11.4461
BERNOULLI	Urban100	img_099_SRF_2_HR	190	0.670726	11.6355
BERNOULLI	Urban100	img_099_SRF_2_HR	200	0.639657	11.781
BERNOULLI	Urban100	img_099_SRF_2_HR	210	0.596111	11.714
BERNOULLI	Urban100	img_099_SRF_2_HR	220	0.544574	12.0028
BERNOULLI	Urban100	img_099_SRF_2_HR	230	0.480313	12.1639
BERNOULLI	Urban100	img_099_SRF_2_HR	240	0.390523	12.59
BERNOULLI	Urban100	img_032_SRF_2_HR	150	0.910274	30.8246
BERNOULLI	Urban100	img_032_SRF_2_HR	160	0.901186	30.2051
BERNOULLI	Urban100	img_032_SRF_2_HR	170	0.884625	29.449
BERNOULLI	Urban100	img_032_SRF_2_HR	180	0.868126	28.713
BERNOULLI	Urban100	img_032_SRF_2_HR	190	0.848483	28.0192
BERNOULLI	Urban100	img_032_SRF_2_HR	200	0.824634	27.2542
BERNOULLI	Urban100	img_032_SRF_2_HR	210	0.794178	26.3318
BERNOULLI	Urban100	img_032_SRF_2_HR	220	0.761764	25.4407
BERNOULLI	Urban100	img_032_SRF_2_HR	230	0.71845	24.3935
BERNOULLI	Urban100	img_032_SRF_2_HR	240	0.664127	23.3713
BERNOULLI	Urban100	img_082_SRF_2_HR	150	0.975156	33.5658
BERNOULLI	Urban100	img_082_SRF_2_HR	160	0.971184	32.6714
BERNOULLI	Urban100	img_082_SRF_2_HR	170	0.96663	31.5083
BERNOULLI	Urban100	img_082_SRF_2_HR	180	0.959781	30.4202
BERNOULLI	Urban100	img_082_SRF_2_HR	190	0.953517	29.5498
BERNOULLI	Urban100	img_082_SRF_2_HR	200	0.940961	28.2989
BERNOULLI	Urban100	img_082_SRF_2_HR	210	0.926365	26.7305
BERNOULLI	Urban100	img_082_SRF_2_HR	220	0.90436	25.364
BERNOULLI	Urban100	img_082_SRF_2_HR	230	0.867306	23.6123
BERNOULLI	Urban100	img_082_SRF_2_HR	240	0.796634	21.288
BERNOULLI	Urban100	img_067_SRF_2_HR	150	0.925588	22.3503
BERNOULLI	Urban100	img_067_SRF_2_HR	160	0.913691	21.6473
BERNOULLI	Urban100	img_067_SRF_2_HR	170	0.9008	21.0242
BERNOULLI	Urban100	img_067_SRF_2_HR	180	0.879802	19.7895
BERNOULLI	Urban100	img_067_SRF_2_HR	190	0.853628	19.0251
BERNOULLI	Urban100	img_067_SRF_2_HR	200	0.820029	17.8867
BERNOULLI	Urban100	img_067_SRF_2_HR	210	0.782488	16.9971
BERNOULLI	Urban100	img_067_SRF_2_HR	220	0.729133	15.9301
BERNOULLI	Urban100	img_067_SRF_2_HR	230	0.655606	14.7284
BERNOULLI	Urban100	img_067_SRF_2_HR	240	0.526448	13.0297
BERNOULLI	Urban100	img_028_SRF_2_HR	150	0.964959	33.8579
BERNOULLI	Urban100	img_028_SRF_2_HR	160	0.960244	32.7575
BERNOULLI	Urban100	img_028_SRF_2_HR	170	0.956154	32.2164
BERNOULLI	Urban100	img_028_SRF_2_HR	180	0.945308	30.8249
BERNOULLI	Urban100	img_028_SRF_2_HR	190	0.937607	30.3494
BERNOULLI	Urban100	img_028_SRF_2_HR	200	0.925472	29.5712
BERNOULLI	Urban100	img_028_SRF_2_HR	210	0.910422	28.6141
BERNOULLI	Urban100	img_028_SRF_2_HR	220	0.886403	27.5878
BERNOULLI	Urban100	img_028_SRF_2_HR	230	0.846735	26.2114
BERNOULLI	Urban100	img_028_SRF_2_HR	240	0.775577	24.4797
BERNOULLI	Urban100	img_026_SRF_2_HR	150	0.94884	33.2631
BERNOULLI	Urban100	img_026_SRF_2_HR	160	0.942021	32.5436
BERNOULLI	Urban100	img_026_SRF_2_HR	170	0.936121	31.9744
BERNOULLI	Urban100	img_026_SRF_2_HR	180	0.923164	30.8791
BERNOULLI	Urban100	img_026_SRF_2_HR	190	0.913377	30.0833
BERNOULLI	Urban100	img_026_SRF_2_HR	200	0.894537	29.0208
BERNOULLI	Urban100	img_026_SRF_2_HR	210	0.871977	27.8419
BERNOULLI	Urban100	img_026_SRF_2_HR	220	0.837902	26.7189
BERNOULLI	Urban100	img_026_SRF_2_HR	230	0.799274	25.5477
BERNOULLI	Urban100	img_026_SRF_2_HR	240	0.728886	23.9108
BERNOULLI	Urban100	img_031_SRF_2_HR	150	0.891108	22.7448
BERNOULLI	Urban100	img_031_SRF_2_HR	160	0.875051	22.1712
BERNOULLI	Urban100	img_031_SRF_2_HR	170	0.861191	22.1902
BERNOULLI	Urban100	img_031_SRF_2_HR	180	0.840413	21.6863
BERNOULLI	Urban100	img_031_SRF_2_HR	190	0.819115	21.106
BERNOULLI	Urban100	img_031_SRF_2_HR	200	0.795578	20.753
BERNOULLI	Urban100	img_031_SRF_2_HR	210	0.76098	20.2175
BERNOULLI	Urban100	img_031_SRF_2_HR	220	0.707025	19.9681
BERNOULLI	Urban100	img_031_SRF_2_HR	230	0.639289	19.2321
BERNOULLI	Urban100	img_031_SRF_2_HR	240	0.537077	18.5857
BERNOULLI	Urban100	img_041_SRF_2_HR	150	0.947585	25.483
BERNOULLI	Urban100	img_041_SRF_2_HR	160	0.940786	24.8445
BERNOULLI	Urban100	img_041_SRF_2_HR	170	0.926211	23.8034
BERNOULLI	Urban100	img_041_SRF_2_HR	180	0.910091	22.8248
BERNOULLI	Urban100	img_041_SRF_2_HR	190	0.89043	21.941
BERNOULLI	Urban100	img_041_SRF_2_HR	200	0.860047	20.7362
BERNOULLI	Urban100	img_041_SRF_2_HR	210	0.823307	19.5556
BERNOULLI	Urban100	img_041_SRF_2_HR	220	0.769789	18.4757
BERNOULLI	Urban100	img_041_SRF_2_HR	230	0.686711	16.9535
BERNOULLI	Urban100	img_041_SRF_2_HR	240	0.560005	15.3479
BERNOULLI	Urban100	img_030_SRF_2_HR	150	0.93638	26.5506
BERNOULLI	Urban100	img_030_SRF_2_HR	160	0.925123	25.7832
BERNOULLI	Urban100	img_030_SRF_2_HR	170	0.910034	25.0338
BERNOULLI	Urban100	img_030_SRF_2_HR	180	0.888166	24.0661
BERNOULLI	Urban100	img_030_SRF_2_HR	190	0.863286	23.1548
BERNOULLI	Urban100	img_030_SRF_2_HR	200	0.835987	22.2742
BERNOULLI	Urban100	img_030_SRF_2_HR	210	0.7924	21.2364
BERNOULLI	Urban100	img_030_SRF_2_HR	220	0.7308	20.0667
BERNOULLI	Urban100	img_030_SRF_2_HR	230	0.655001	18.9316
BERNOULLI	Urban100	img_030_SRF_2_HR	240	0.53386	17.3093
BERNOULLI	Urban100	img_017_SRF_2_HR	150	0.944842	28.3072
BERNOULLI	Urban100	img_017_SRF_2_HR	160	0.934562	27.5746
BERNOULLI	Urban100	img_017_SRF_2_HR	170	0.923163	26.8382
BERNOULLI	Urban100	img_017_SRF_2_HR	180	0.908225	26.0196
BERNOULLI	Urban100	img_017_SRF_2_HR	190	0.891011	25.1717
BERNOULLI	Urban100	img_017_SRF_2_HR	200	0.867468	24.2356
BERNOULLI	Urban100	img_017_SRF_2_HR	210	0.837821	23.3281
BERNOULLI	Urban100	img_017_SRF_2_HR	220	0.799212	22.3127
BERNOULLI	Urban100	img_017_SRF_2_HR	230	0.741516	21.0022
BERNOULLI	Urban100	img_017_SRF_2_HR	240	0.662441	19.8246
BERNOULLI	Urban100	img_037_SRF_2_HR	150	0.913629	26.7691
BERNOULLI	Urban100	img_037_SRF_2_HR	160	0.902262	26.1481
BERNOULLI	Urban100	img_037_SRF_2_HR	170	0.885968	25.4313
BERNOULLI	Urban100	img_037_SRF_2_HR	180	0.866761	24.7579
BERNOULLI	Urban100	img_037_SRF_2_HR	190	0.839331	23.7794
BERNOULLI	Urban100	img_037_SRF_2_HR	200	0.812047	22.9837
BERNOULLI	Urban100	img_037_SRF_2_HR	210	0.773504	22.0525
BERNOULLI	Urban100	img_037_SRF_2_HR	220	0.721214	20.9745
BERNOULLI	Urban100	img_037_SRF_2_HR	230	0.652968	19.963
BERNOULLI	Urban100	img_037_SRF_2_HR	240	0.552503	18.59
BERNOULLI	Urban100	img_059_SRF_2_HR	150	0.907243	27.9378
BERNOULLI	Urban100	img_059_SRF_2_HR	160	0.89466	27.2147
BERNOULLI	Urban100	img_059_SRF_2_HR	170	0.878205	26.4044
BERNOULLI	Urban100	img_059_SRF_2_HR	180	0.862292	25.7678
BERNOULLI	Urban100	img_059_SRF_2_HR	190	0.840118	24.8615
BERNOULLI	Urban100	img_059_SRF_2_HR	200	0.812942	24.2025
BERNOULLI	Urban100	img_059_SRF_2_HR	210	0.782053	23.4104
BERNOULLI	Urban100	img_059_SRF_2_HR	220	0.747416	22.6233
BERNOULLI	Urban100	img_059_SRF_2_HR	230	0.698652	21.7017
BERNOULLI	Urban100	img_059_SRF_2_HR	240	0.643107	20.9141
BERNOULLI	Urban100	img_039_SRF_2_HR	150	0.894026	26.418
BERNOULLI	Urban100	img_039_SRF_2_HR	160	0.876874	25.6614
BERNOULLI	Urban100	img_039_SRF_2_HR	170	0.859531	24.9481
BERNOULLI	Urban100	img_039_SRF_2_HR	180	0.836708	24.3113
BERNOULLI	Urban100	img_039_SRF_2_HR	190	0.810755	23.4484
BERNOULLI	Urban100	img_039_SRF_2_HR	200	0.779179	22.6537
BERNOULLI	Urban100	img_039_SRF_2_HR	210	0.741209	21.7958
BERNOULLI	Urban100	img_039_SRF_2_HR	220	0.692983	21.0025
BERNOULLI	Urban100	img_039_SRF_2_HR	230	0.63348	19.9908
BERNOULLI	Urban100	img_039_SRF_2_HR	240	0.54771	18.674
BERNOULLI	Urban100	img_014_SRF_2_HR	150	0.906604	27.7809
BERNOULLI	Urban100	img_014_SRF_2_HR	160	0.892599	27.192
BERNOULLI	Urban100	img_014_SRF_2_HR	170	0.878085	26.5042
BERNOULLI	Urban100	img_014_SRF_2_HR	180	0.859926	25.8711
BERNOULLI	Urban100	img_014_SRF_2_HR	190	0.835579	25.163
BERNOULLI	Urban100	img_014_SRF_2_HR	200	0.811751	24.4995
BERNOULLI	Urban100	img_014_SRF_2_HR	210	0.771335	23.6061
BERNOULLI	Urban100	img_014_SRF_2_HR	220	0.733002	22.8951
BERNOULLI	Urban100	img_014_SRF_2_HR	230	0.68058	22.092
BERNOULLI	Urban100	img_014_SRF_2_HR	240	0.59995	21.1027
BERNOULLI	Urban100	img_004_SRF_2_HR	150	0.913569	23.499
BERNOULLI	Urban100	img_004_SRF_2_HR	160	0.896905	22.7165
BERNOULLI	Urban100	img_004_SRF_2_HR	170	0.877208	21.9342
BERNOULLI	Urban100	img_004_SRF_2_HR	180	0.851587	21.0867
BERNOULLI	Urban100	img_004_SRF_2_HR	190	0.815448	20.2082
BERNOULLI	Urban100	img_004_SRF_2_HR	200	0.777672	19.4782
BERNOULLI	Urban100	img_004_SRF_2_HR	210	0.73078	18.8276
BERNOULLI	Urban100	img_004_SRF_2_HR	220	0.662295	17.8909
BERNOULLI	Urban100	img_004_SRF_2_HR	230	0.557606	16.7537
[truncated: 4,937 more rows]
