# Supplementary material for: MPDenoiseNet: Resource-Efficient Deep Learning Approach for Image Denoising
Source: Research Square preprint supplement (doi:10.21203/rs.3.rs-6641644/v1), 2025-05-20
Supplement: Supplementary file 11 [file runtime_comparison_cpu.xlsx]

## Sheet: Sheet1
Image Size	Restormer Time (s)	Our Model Time (s)	Restormer Memory (bytes)	Our Model Memory (bytes)	Restormer Throughput (images/s)	Our Model Throughput (images/s)	Restormer Params	Our Model Params
64	6.00815e-06	2.59876e-06	233881600	233881600	166441	384799	0	0
128	2.93255e-06	2.36034e-06	233881600	233881600	341000	423667	0	0
256	4.57764e-06	4.1008e-06	2.34327e+08	234405888	218453	243855	0	0
512	5.14984e-06	5.07832e-06	2.37971e+08	2.39134e+08	194181	196916	0	0
1024	1.45197e-05	1.5831e-05	2.52474e+08	2.65477e+08	68872	63167.2	0	0
2048	2.08378e-05	2.05517e-05	2.97789e+08	2.99472e+08	47989.7	48657.8	0	0
4096	2.67744e-05	2.80857e-05	4.2699e+08	433700864	37349.1	35605.3	0	0
