# Supplementary material for: MPDenoiseNet: Resource-Efficient Deep Learning Approach for Image Denoising
Source: Research Square preprint supplement (doi:10.21203/rs.3.rs-6641644/v1), 2025-05-20
Supplement: Supplementary file 13 [file runtime_comparison_cpu_mps.xlsx]

## Sheet: Sheet1
Image Size	Restormer Time (s)	Our Model Time (s)	Restormer Throughput (images/s)	Our Model Throughput (images/s)	Restormer Params	Our Model Params
64	0.114485	0.0905053	8.7348	11.0491	26124052	17806062
128	0.115354	0.0924736	8.66899	10.8139	26124052	17806062
256	0.26356	0.120418	3.7942	8.30438	26124052	17806062
512	1.56244	0.544737	0.640025	1.83575	26124052	17806062
1024	8.95514	2.72112	0.111668	0.367495	26124052	17806062
