# Supplementary material for: MPDenoiseNet: Resource-Efficient Deep Learning Approach for Image Denoising
Source: Research Square preprint supplement (doi:10.21203/rs.3.rs-6641644/v1), 2025-05-20
Supplement: Supplementary file 15 [file runtime_comparison_cuda.xlsx]

## Sheet: Sheet1
Image Size	Restormer Time (s)	Our Model Time (s)	Restormer Memory (bytes)	Our Model Memory (bytes)	Restormer Throughput (images/s)	Our Model Throughput (images/s)
64	0.0397561	0.0220915	260014080	222801920	25.1534	45.2662
128	0.0414557	0.0227536	3.21924e+08	1.42683e+08	24.1222	43.9491
256	0.046692	0.024041	545073664	3.22121e+08	21.4169	41.5956
512	0.157119	0.0316119	1768987136	1.03725e+09	6.3646	31.6337
1024	0.819197	0.0423538	6736091648	3.89855e+09	1.22071	23.6106
2048	Not completed, Cuda ran out of memory	0.396431	Not completed, Cuda ran out of memory	15348936704	Not completed, Cuda ran out of memory	2.5225
4096	Not completed, Cuda ran out of memory	Not completed, Cuda ran out of memory	Not completed, Cuda ran out of memory	Not completed, Cuda ran out of memory	Not completed, Cuda ran out of memory	Not completed, Cuda ran out of memory
