# Supplementary material for: MPDenoiseNet: Resource-Efficient Deep Learning Approach for Image Denoising
Source: Research Square preprint supplement (doi:10.21203/rs.3.rs-6641644/v1), 2025-05-20
Supplement: Supplementary file 17 [file MPDenoiseNet Experiment Results.xlsx]

## Sheet: Data
noise_type	dataset	im_index	noise_parameter	SSIM	PSNR
BERNOULLI	Kodak24	kodim24	150	0.92166	28.0874
BERNOULLI	Kodak24	kodim24	160	0.908753	27.313
BERNOULLI	Kodak24	kodim24	170	0.895429	26.7797
BERNOULLI	Kodak24	kodim24	180	0.878559	26.1989
BERNOULLI	Kodak24	kodim24	190	0.858367	25.6283
BERNOULLI	Kodak24	kodim24	200	0.834795	25.087
BERNOULLI	Kodak24	kodim24	210	0.807492	24.3393
BERNOULLI	Kodak24	kodim24	220	0.768542	23.8207
BERNOULLI	Kodak24	kodim24	230	0.719813	22.9226
BERNOULLI	Kodak24	kodim24	240	0.644413	21.9299
BERNOULLI	Kodak24	kodim15	150	0.940943	31.6034
BERNOULLI	Kodak24	kodim15	160	0.933177	31.3687
BERNOULLI	Kodak24	kodim15	170	0.924781	31.0437
BERNOULLI	Kodak24	kodim15	180	0.915249	30.751
BERNOULLI	Kodak24	kodim15	190	0.90561	30.4699
BERNOULLI	Kodak24	kodim15	200	0.893408	30.1155
BERNOULLI	Kodak24	kodim15	210	0.876914	29.6173
BERNOULLI	Kodak24	kodim15	220	0.858634	29.1205
BERNOULLI	Kodak24	kodim15	230	0.831471	28.3056
BERNOULLI	Kodak24	kodim15	240	0.796051	26.8463
BERNOULLI	Kodak24	kodim17	150	0.955462	34.053
BERNOULLI	Kodak24	kodim17	160	0.948937	33.4084
BERNOULLI	Kodak24	kodim17	170	0.942183	32.7095
BERNOULLI	Kodak24	kodim17	180	0.933754	32.0721
BERNOULLI	Kodak24	kodim17	190	0.922689	31.2531
BERNOULLI	Kodak24	kodim17	200	0.911047	30.5514
BERNOULLI	Kodak24	kodim17	210	0.894178	29.7463
BERNOULLI	Kodak24	kodim17	220	0.873137	28.9477
BERNOULLI	Kodak24	kodim17	230	0.838988	27.7594
BERNOULLI	Kodak24	kodim17	240	0.788409	26.4687
BERNOULLI	Kodak24	kodim03	150	0.966585	32.9672
BERNOULLI	Kodak24	kodim03	160	0.963156	32.7438
BERNOULLI	Kodak24	kodim03	170	0.956594	32.4233
BERNOULLI	Kodak24	kodim03	180	0.950721	32.1346
BERNOULLI	Kodak24	kodim03	190	0.940898	31.7922
BERNOULLI	Kodak24	kodim03	200	0.929553	31.3149
BERNOULLI	Kodak24	kodim03	210	0.915803	30.8622
BERNOULLI	Kodak24	kodim03	220	0.897202	30.3225
BERNOULLI	Kodak24	kodim03	230	0.871469	29.5638
BERNOULLI	Kodak24	kodim03	240	0.836341	28.6311
BERNOULLI	Kodak24	kodim06	150	0.917026	29.0572
BERNOULLI	Kodak24	kodim06	160	0.903356	28.5514
BERNOULLI	Kodak24	kodim06	170	0.890871	28.1155
BERNOULLI	Kodak24	kodim06	180	0.873057	27.5116
BERNOULLI	Kodak24	kodim06	190	0.854163	27.0349
BERNOULLI	Kodak24	kodim06	200	0.827726	26.3756
BERNOULLI	Kodak24	kodim06	210	0.795149	25.6743
BERNOULLI	Kodak24	kodim06	220	0.758633	25.0286
BERNOULLI	Kodak24	kodim06	230	0.704231	24.219
BERNOULLI	Kodak24	kodim06	240	0.623342	23.1847
BERNOULLI	Kodak24	kodim02	150	0.922966	32.021
BERNOULLI	Kodak24	kodim02	160	0.913207	31.7813
BERNOULLI	Kodak24	kodim02	170	0.903735	31.4944
BERNOULLI	Kodak24	kodim02	180	0.891658	31.2238
BERNOULLI	Kodak24	kodim02	190	0.876695	30.8941
BERNOULLI	Kodak24	kodim02	200	0.862711	30.6655
BERNOULLI	Kodak24	kodim02	210	0.842327	30.1755
BERNOULLI	Kodak24	kodim02	220	0.820901	29.8066
BERNOULLI	Kodak24	kodim02	230	0.792302	29.2757
BERNOULLI	Kodak24	kodim02	240	0.752581	28.4209
BERNOULLI	Kodak24	kodim14	150	0.914582	29.1982
BERNOULLI	Kodak24	kodim14	160	0.901786	28.7413
BERNOULLI	Kodak24	kodim14	170	0.88706	28.3255
BERNOULLI	Kodak24	kodim14	180	0.870035	27.8446
BERNOULLI	Kodak24	kodim14	190	0.847764	27.1851
BERNOULLI	Kodak24	kodim14	200	0.821787	26.6812
BERNOULLI	Kodak24	kodim14	210	0.791746	25.983
BERNOULLI	Kodak24	kodim14	220	0.746717	25.1701
BERNOULLI	Kodak24	kodim14	230	0.694725	24.5157
BERNOULLI	Kodak24	kodim14	240	0.615099	23.2397
BERNOULLI	Kodak24	kodim07	150	0.975367	33.1202
BERNOULLI	Kodak24	kodim07	160	0.971683	32.8273
BERNOULLI	Kodak24	kodim07	170	0.966726	32.1884
BERNOULLI	Kodak24	kodim07	180	0.961643	31.7997
BERNOULLI	Kodak24	kodim07	190	0.95499	31.2353
BERNOULLI	Kodak24	kodim07	200	0.945266	30.582
BERNOULLI	Kodak24	kodim07	210	0.932521	29.6597
BERNOULLI	Kodak24	kodim07	220	0.91684	28.8861
BERNOULLI	Kodak24	kodim07	230	0.889825	27.5748
BERNOULLI	Kodak24	kodim07	240	0.840116	25.9122
BERNOULLI	Kodak24	kodim20	150	0.945908	31.8468
BERNOULLI	Kodak24	kodim20	160	0.939312	31.338
BERNOULLI	Kodak24	kodim20	170	0.93312	31.1281
BERNOULLI	Kodak24	kodim20	180	0.925289	30.6268
BERNOULLI	Kodak24	kodim20	190	0.914698	30.0126
BERNOULLI	Kodak24	kodim20	200	0.904723	29.4723
BERNOULLI	Kodak24	kodim20	210	0.891951	28.6593
BERNOULLI	Kodak24	kodim20	220	0.874967	28.0137
BERNOULLI	Kodak24	kodim20	230	0.852873	26.8549
BERNOULLI	Kodak24	kodim20	240	0.820793	25.354
BERNOULLI	Kodak24	kodim11	150	0.924313	30.1567
BERNOULLI	Kodak24	kodim11	160	0.914626	29.6785
BERNOULLI	Kodak24	kodim11	170	0.901687	29.2252
BERNOULLI	Kodak24	kodim11	180	0.887885	28.7628
BERNOULLI	Kodak24	kodim11	190	0.868257	28.1798
BERNOULLI	Kodak24	kodim11	200	0.846904	27.4679
BERNOULLI	Kodak24	kodim11	210	0.820391	26.8022
BERNOULLI	Kodak24	kodim11	220	0.789301	26.2011
BERNOULLI	Kodak24	kodim11	230	0.744481	25.2683
BERNOULLI	Kodak24	kodim11	240	0.681715	24.2105
BERNOULLI	Kodak24	kodim12	150	0.947243	32.9389
BERNOULLI	Kodak24	kodim12	160	0.93988	32.6654
BERNOULLI	Kodak24	kodim12	170	0.931296	32.3187
BERNOULLI	Kodak24	kodim12	180	0.922669	31.9322
BERNOULLI	Kodak24	kodim12	190	0.911367	31.4805
BERNOULLI	Kodak24	kodim12	200	0.896342	30.9531
BERNOULLI	Kodak24	kodim12	210	0.881055	30.5496
BERNOULLI	Kodak24	kodim12	220	0.860717	29.7703
BERNOULLI	Kodak24	kodim12	230	0.832608	28.5439
BERNOULLI	Kodak24	kodim12	240	0.785568	27.113
BERNOULLI	Kodak24	kodim09	150	0.954002	32.9337
BERNOULLI	Kodak24	kodim09	160	0.94806	32.5114
BERNOULLI	Kodak24	kodim09	170	0.942594	32.1484
BERNOULLI	Kodak24	kodim09	180	0.935969	31.5835
BERNOULLI	Kodak24	kodim09	190	0.928312	31.2987
BERNOULLI	Kodak24	kodim09	200	0.916967	30.7061
BERNOULLI	Kodak24	kodim09	210	0.903971	30.0288
BERNOULLI	Kodak24	kodim09	220	0.88715	29.0076
BERNOULLI	Kodak24	kodim09	230	0.860089	27.9223
BERNOULLI	Kodak24	kodim09	240	0.821633	26.3881
BERNOULLI	Kodak24	kodim01	150	0.886263	27.9164
BERNOULLI	Kodak24	kodim01	160	0.870794	27.4391
BERNOULLI	Kodak24	kodim01	170	0.85378	27.005
BERNOULLI	Kodak24	kodim01	180	0.833055	26.4918
BERNOULLI	Kodak24	kodim01	190	0.80763	25.9317
BERNOULLI	Kodak24	kodim01	200	0.780602	25.3828
BERNOULLI	Kodak24	kodim01	210	0.745833	24.8058
BERNOULLI	Kodak24	kodim01	220	0.704606	24.086
BERNOULLI	Kodak24	kodim01	230	0.645406	23.2612
BERNOULLI	Kodak24	kodim01	240	0.557976	22.1449
BERNOULLI	Kodak24	kodim04	150	0.935318	32.5739
BERNOULLI	Kodak24	kodim04	160	0.927055	32.1702
BERNOULLI	Kodak24	kodim04	170	0.917232	31.8455
BERNOULLI	Kodak24	kodim04	180	0.905286	31.5406
BERNOULLI	Kodak24	kodim04	190	0.89245	31.0746
BERNOULLI	Kodak24	kodim04	200	0.87644	30.5989
BERNOULLI	Kodak24	kodim04	210	0.85859	30.0878
BERNOULLI	Kodak24	kodim04	220	0.836113	29.6112
BERNOULLI	Kodak24	kodim04	230	0.805863	28.6321
BERNOULLI	Kodak24	kodim04	240	0.758736	27.4764
BERNOULLI	Kodak24	kodim23	150	0.970042	33.5133
BERNOULLI	Kodak24	kodim23	160	0.966687	33.2468
BERNOULLI	Kodak24	kodim23	170	0.962781	32.9203
BERNOULLI	Kodak24	kodim23	180	0.958577	32.5305
BERNOULLI	Kodak24	kodim23	190	0.952282	32.0419
BERNOULLI	Kodak24	kodim23	200	0.945406	31.6321
BERNOULLI	Kodak24	kodim23	210	0.936457	30.8032
BERNOULLI	Kodak24	kodim23	220	0.925131	30.188
BERNOULLI	Kodak24	kodim23	230	0.908896	29.2139
BERNOULLI	Kodak24	kodim23	240	0.879519	27.7724
BERNOULLI	Kodak24	kodim22	150	0.914231	31.174
BERNOULLI	Kodak24	kodim22	160	0.903001	30.7241
BERNOULLI	Kodak24	kodim22	170	0.890824	30.2422
BERNOULLI	Kodak24	kodim22	180	0.874896	29.7786
BERNOULLI	Kodak24	kodim22	190	0.856256	29.2608
BERNOULLI	Kodak24	kodim22	200	0.836294	28.7402
BERNOULLI	Kodak24	kodim22	210	0.809437	28.1228
BERNOULLI	Kodak24	kodim22	220	0.776261	27.407
BERNOULLI	Kodak24	kodim22	230	0.730939	26.4936
BERNOULLI	Kodak24	kodim22	240	0.670145	25.4387
BERNOULLI	Kodak24	kodim05	150	0.940258	28.5352
BERNOULLI	Kodak24	kodim05	160	0.928766	27.9441
BERNOULLI	Kodak24	kodim05	170	0.915754	27.3374
BERNOULLI	Kodak24	kodim05	180	0.899743	26.66
BERNOULLI	Kodak24	kodim05	190	0.876313	25.8473
BERNOULLI	Kodak24	kodim05	200	0.847625	24.9699
BERNOULLI	Kodak24	kodim05	210	0.81401	24.19
BERNOULLI	Kodak24	kodim05	220	0.763485	23.0813
BERNOULLI	Kodak24	kodim05	230	0.69744	21.9606
BERNOULLI	Kodak24	kodim05	240	0.59914	20.6568
BERNOULLI	Kodak24	kodim13	150	0.834285	24.4809
BERNOULLI	Kodak24	kodim13	160	0.810252	23.9191
BERNOULLI	Kodak24	kodim13	170	0.784293	23.4581
BERNOULLI	Kodak24	kodim13	180	0.752972	22.9131
BERNOULLI	Kodak24	kodim13	190	0.719495	22.4031
BERNOULLI	Kodak24	kodim13	200	0.682123	21.9295
BERNOULLI	Kodak24	kodim13	210	0.633822	21.3324
BERNOULLI	Kodak24	kodim13	220	0.578156	20.7176
BERNOULLI	Kodak24	kodim13	230	0.512544	20.0748
BERNOULLI	Kodak24	kodim13	240	0.421523	19.2788
BERNOULLI	Kodak24	kodim18	150	0.908145	28.8564
BERNOULLI	Kodak24	kodim18	160	0.897935	28.4026
BERNOULLI	Kodak24	kodim18	170	0.880519	27.7283
BERNOULLI	Kodak24	kodim18	180	0.86076	27.2042
BERNOULLI	Kodak24	kodim18	190	0.839185	26.5784
BERNOULLI	Kodak24	kodim18	200	0.813814	25.929
BERNOULLI	Kodak24	kodim18	210	0.781453	25.3431
BERNOULLI	Kodak24	kodim18	220	0.742458	24.7127
BERNOULLI	Kodak24	kodim18	230	0.688624	23.8606
BERNOULLI	Kodak24	kodim18	240	0.607457	22.633
BERNOULLI	Kodak24	kodim10	150	0.958738	33.1078
BERNOULLI	Kodak24	kodim10	160	0.953665	32.6878
BERNOULLI	Kodak24	kodim10	170	0.948186	32.2485
BERNOULLI	Kodak24	kodim10	180	0.9403	31.7167
BERNOULLI	Kodak24	kodim10	190	0.932506	31.2302
BERNOULLI	Kodak24	kodim10	200	0.920993	30.5061
BERNOULLI	Kodak24	kodim10	210	0.906014	29.5976
BERNOULLI	Kodak24	kodim10	220	0.883361	28.6954
BERNOULLI	Kodak24	kodim10	230	0.852206	27.5877
BERNOULLI	Kodak24	kodim10	240	0.80514	26.3638
BERNOULLI	Kodak24	kodim08	150	0.923178	27.2989
BERNOULLI	Kodak24	kodim08	160	0.910974	26.5615
BERNOULLI	Kodak24	kodim08	170	0.899125	26.108
BERNOULLI	Kodak24	kodim08	180	0.883246	25.3501
BERNOULLI	Kodak24	kodim08	190	0.865933	24.7206
BERNOULLI	Kodak24	kodim08	200	0.842682	24.0601
BERNOULLI	Kodak24	kodim08	210	0.811345	23.0733
BERNOULLI	Kodak24	kodim08	220	0.765306	22.0655
BERNOULLI	Kodak24	kodim08	230	0.701681	20.6018
BERNOULLI	Kodak24	kodim08	240	0.610592	19.1947
BERNOULLI	Kodak24	kodim19	150	0.923792	32.8921
BERNOULLI	Kodak24	kodim19	160	0.914016	32.2555
BERNOULLI	Kodak24	kodim19	170	0.903614	31.7104
BERNOULLI	Kodak24	kodim19	180	0.891338	30.9586
BERNOULLI	Kodak24	kodim19	190	0.875534	30.225
BERNOULLI	Kodak24	kodim19	200	0.8597	29.4895
BERNOULLI	Kodak24	kodim19	210	0.83827	28.6752
BERNOULLI	Kodak24	kodim19	220	0.809531	27.3175
BERNOULLI	Kodak24	kodim19	230	0.77364	26.0992
BERNOULLI	Kodak24	kodim19	240	0.712136	24.1458
BERNOULLI	Kodak24	kodim16	150	0.935448	31.1269
BERNOULLI	Kodak24	kodim16	160	0.925775	30.7331
BERNOULLI	Kodak24	kodim16	170	0.915155	30.3657
BERNOULLI	Kodak24	kodim16	180	0.902891	30.0381
BERNOULLI	Kodak24	kodim16	190	0.885744	29.5753
BERNOULLI	Kodak24	kodim16	200	0.867599	29.1288
BERNOULLI	Kodak24	kodim16	210	0.844953	28.6698
BERNOULLI	Kodak24	kodim16	220	0.815152	28.1383
BERNOULLI	Kodak24	kodim16	230	0.774364	27.576
BERNOULLI	Kodak24	kodim16	240	0.71446	26.7225
BERNOULLI	Kodak24	kodim21	150	0.927619	29.359
BERNOULLI	Kodak24	kodim21	160	0.917889	28.8396
BERNOULLI	Kodak24	kodim21	170	0.907089	28.282
BERNOULLI	Kodak24	kodim21	180	0.893153	27.6712
BERNOULLI	Kodak24	kodim21	190	0.878841	27.1148
BERNOULLI	Kodak24	kodim21	200	0.861647	26.5937
BERNOULLI	Kodak24	kodim21	210	0.838657	25.8706
BERNOULLI	Kodak24	kodim21	220	0.812138	25.1471
BERNOULLI	Kodak24	kodim21	230	0.77146	24.2721
BERNOULLI	Kodak24	kodim21	240	0.716635	23.1083
BERNOULLI	BSD68	16	150	0.934122	30.7158
BERNOULLI	BSD68	16	160	0.925519	30.0421
BERNOULLI	BSD68	16	170	0.914256	29.5268
BERNOULLI	BSD68	16	180	0.899178	28.6293
BERNOULLI	BSD68	16	190	0.884949	28.1508
BERNOULLI	BSD68	16	200	0.863939	27.11
BERNOULLI	BSD68	16	210	0.842394	26.4596
BERNOULLI	BSD68	16	220	0.814277	25.676
BERNOULLI	BSD68	16	230	0.767825	24.5867
BERNOULLI	BSD68	16	240	0.69517	23.0044
BERNOULLI	BSD68	62	150	0.907608	31.1179
BERNOULLI	BSD68	62	160	0.89646	30.5593
BERNOULLI	BSD68	62	170	0.884178	29.9547
BERNOULLI	BSD68	62	180	0.868597	29.5807
BERNOULLI	BSD68	62	190	0.851699	29.0332
BERNOULLI	BSD68	62	200	0.831281	28.4317
BERNOULLI	BSD68	62	210	0.806494	27.3888
BERNOULLI	BSD68	62	220	0.779141	26.6594
BERNOULLI	BSD68	62	230	0.750163	26.1286
BERNOULLI	BSD68	62	240	0.707174	25.0267
BERNOULLI	BSD68	46	150	0.916541	28.2879
BERNOULLI	BSD68	46	160	0.904129	27.6109
BERNOULLI	BSD68	46	170	0.887715	27.049
BERNOULLI	BSD68	46	180	0.870265	26.4413
BERNOULLI	BSD68	46	190	0.848631	25.7845
BERNOULLI	BSD68	46	200	0.817534	25.0043
BERNOULLI	BSD68	46	210	0.776488	24.1811
BERNOULLI	BSD68	46	220	0.724731	23.3434
BERNOULLI	BSD68	46	230	0.662547	22.4552
BERNOULLI	BSD68	46	240	0.578147	21.5366
BERNOULLI	BSD68	33	150	0.812563	21.6509
BERNOULLI	BSD68	33	160	0.78806	21.1989
BERNOULLI	BSD68	33	170	0.760563	20.6702
BERNOULLI	BSD68	33	180	0.72986	20.1295
BERNOULLI	BSD68	33	190	0.695171	19.6795
BERNOULLI	BSD68	33	200	0.661893	19.2926
BERNOULLI	BSD68	33	210	0.61639	18.7216
BERNOULLI	BSD68	33	220	0.554774	18.0286
BERNOULLI	BSD68	33	230	0.507677	17.5806
BERNOULLI	BSD68	33	240	0.423164	16.7145
BERNOULLI	BSD68	9	150	0.945199	31.7754
BERNOULLI	BSD68	9	160	0.933786	31.0001
BERNOULLI	BSD68	9	170	0.924353	30.4155
BERNOULLI	BSD68	9	180	0.912974	29.8235
BERNOULLI	BSD68	9	190	0.897139	28.9501
BERNOULLI	BSD68	9	200	0.878931	28.2083
BERNOULLI	BSD68	9	210	0.863421	27.5404
BERNOULLI	BSD68	9	220	0.836481	26.4812
BERNOULLI	BSD68	9	230	0.797716	25.205
BERNOULLI	BSD68	9	240	0.753554	24.3566
BERNOULLI	BSD68	49	150	0.892714	27.7718
BERNOULLI	BSD68	49	160	0.875624	27.1576
BERNOULLI	BSD68	49	170	0.856223	26.5198
BERNOULLI	BSD68	49	180	0.834448	25.9422
BERNOULLI	BSD68	49	190	0.807237	25.34
BERNOULLI	BSD68	49	200	0.779367	24.7446
BERNOULLI	BSD68	49	210	0.739438	24.0462
BERNOULLI	BSD68	49	220	0.687804	23.3316
BERNOULLI	BSD68	49	230	0.620152	22.5269
BERNOULLI	BSD68	49	240	0.515274	21.3525
BERNOULLI	BSD68	17	150	0.938507	32.448
BERNOULLI	BSD68	17	160	0.927765	31.5707
BERNOULLI	BSD68	17	170	0.916906	30.9973
BERNOULLI	BSD68	17	180	0.902974	30.192
BERNOULLI	BSD68	17	190	0.888587	29.7166
BERNOULLI	BSD68	17	200	0.867321	28.9255
BERNOULLI	BSD68	17	210	0.845426	28.3711
BERNOULLI	BSD68	17	220	0.8152	27.5304
BERNOULLI	BSD68	17	230	0.773657	26.5698
BERNOULLI	BSD68	17	240	0.71656	25.5841
BERNOULLI	BSD68	15	150	0.878159	25.7563
BERNOULLI	BSD68	15	160	0.855317	24.9773
BERNOULLI	BSD68	15	170	0.83003	24.3121
BERNOULLI	BSD68	15	180	0.804471	23.7517
BERNOULLI	BSD68	15	190	0.772537	23.1897
BERNOULLI	BSD68	15	200	0.732426	22.4714
BERNOULLI	BSD68	15	210	0.686252	21.8884
BERNOULLI	BSD68	15	220	0.632211	21.2955
BERNOULLI	BSD68	15	230	0.560799	20.5155
BERNOULLI	BSD68	15	240	0.46522	19.7057
BERNOULLI	BSD68	52	150	0.914236	28.6438
BERNOULLI	BSD68	52	160	0.899822	27.7346
BERNOULLI	BSD68	52	170	0.886348	27.0773
BERNOULLI	BSD68	52	180	0.868167	26.0253
BERNOULLI	BSD68	52	190	0.848996	25.488
BERNOULLI	BSD68	52	200	0.820807	24.3346
BERNOULLI	BSD68	52	210	0.797323	23.6338
BERNOULLI	BSD68	52	220	0.760616	22.6483
BERNOULLI	BSD68	52	230	0.702611	21.0808
BERNOULLI	BSD68	52	240	0.620284	19.4126
BERNOULLI	BSD68	25	150	0.906571	27.7961
BERNOULLI	BSD68	25	160	0.894296	27.0397
BERNOULLI	BSD68	25	170	0.880862	26.4458
BERNOULLI	BSD68	25	180	0.868895	25.9852
BERNOULLI	BSD68	25	190	0.852472	25.3568
BERNOULLI	BSD68	25	200	0.83641	24.9995
BERNOULLI	BSD68	25	210	0.815516	24.2631
BERNOULLI	BSD68	25	220	0.788554	23.5851
BERNOULLI	BSD68	25	230	0.758025	22.5909
BERNOULLI	BSD68	25	240	0.719649	21.6179
BERNOULLI	BSD68	22	150	0.94444	29.918
BERNOULLI	BSD68	22	160	0.935754	29.2208
BERNOULLI	BSD68	22	170	0.921093	28.1366
BERNOULLI	BSD68	22	180	0.9067	27.2047
BERNOULLI	BSD68	22	190	0.888749	26.3001
BERNOULLI	BSD68	22	200	0.862041	25.1766
BERNOULLI	BSD68	22	210	0.833163	24.0389
BERNOULLI	BSD68	22	220	0.782553	22.684
BERNOULLI	BSD68	22	230	0.710241	21.219
BERNOULLI	BSD68	22	240	0.601732	19.3828
BERNOULLI	BSD68	61	150	0.912859	33.7281
BERNOULLI	BSD68	61	160	0.90224	33.2148
BERNOULLI	BSD68	61	170	0.890588	32.615
BERNOULLI	BSD68	61	180	0.87803	32.1352
BERNOULLI	BSD68	61	190	0.861896	31.5583
BERNOULLI	BSD68	61	200	0.850618	31.1508
BERNOULLI	BSD68	61	210	0.827435	30.5191
BERNOULLI	BSD68	61	220	0.805633	29.8224
BERNOULLI	BSD68	61	230	0.777177	29.054
BERNOULLI	BSD68	61	240	0.741181	28.1777
BERNOULLI	BSD68	51	150	0.8789	27.7547
BERNOULLI	BSD68	51	160	0.861676	27.119
BERNOULLI	BSD68	51	170	0.844787	26.629
BERNOULLI	BSD68	51	180	0.822487	26.044
BERNOULLI	BSD68	51	190	0.797961	25.5402
BERNOULLI	BSD68	51	200	0.770521	24.9677
BERNOULLI	BSD68	51	210	0.734842	24.2932
BERNOULLI	BSD68	51	220	0.697761	23.8321
BERNOULLI	BSD68	51	230	0.641288	23.0436
BERNOULLI	BSD68	51	240	0.567342	22.0746
BERNOULLI	BSD68	35	150	0.832249	23.8198
BERNOULLI	BSD68	35	160	0.803318	23.1496
BERNOULLI	BSD68	35	170	0.77599	22.5966
BERNOULLI	BSD68	35	180	0.740765	21.995
BERNOULLI	BSD68	35	190	0.701356	21.4307
BERNOULLI	BSD68	35	200	0.6523	20.8615
BERNOULLI	BSD68	35	210	0.597049	20.2648
BERNOULLI	BSD68	35	220	0.527237	19.688
BERNOULLI	BSD68	35	230	0.434019	18.9801
BERNOULLI	BSD68	35	240	0.329646	18.2847
BERNOULLI	BSD68	8	150	0.828242	25.8534
BERNOULLI	BSD68	8	160	0.806617	25.3105
BERNOULLI	BSD68	8	170	0.784558	24.8156
BERNOULLI	BSD68	8	180	0.758881	24.3498
BERNOULLI	BSD68	8	190	0.72967	23.8068
BERNOULLI	BSD68	8	200	0.69847	23.3865
BERNOULLI	BSD68	8	210	0.658742	22.7934
BERNOULLI	BSD68	8	220	0.612251	22.222
BERNOULLI	BSD68	8	230	0.552867	21.5966
BERNOULLI	BSD68	8	240	0.479999	20.7103
BERNOULLI	BSD68	38	150	0.953268	38.2566
BERNOULLI	BSD68	38	160	0.947952	37.5
BERNOULLI	BSD68	38	170	0.942371	37.2626
BERNOULLI	BSD68	38	180	0.935119	36.43
BERNOULLI	BSD68	38	190	0.927367	35.6681
BERNOULLI	BSD68	38	200	0.92022	35.2855
BERNOULLI	BSD68	38	210	0.909099	34.1478
BERNOULLI	BSD68	38	220	0.895809	33.2452
BERNOULLI	BSD68	38	230	0.877745	31.7543
BERNOULLI	BSD68	38	240	0.84509	29.3315
BERNOULLI	BSD68	10	150	0.933023	30.0012
BERNOULLI	BSD68	10	160	0.926013	29.4685
BERNOULLI	BSD68	10	170	0.917264	28.9071
BERNOULLI	BSD68	10	180	0.904765	28.0644
BERNOULLI	BSD68	10	190	0.894711	27.5733
BERNOULLI	BSD68	10	200	0.881439	26.9226
BERNOULLI	BSD68	10	210	0.864344	26.322
BERNOULLI	BSD68	10	220	0.842126	25.201
BERNOULLI	BSD68	10	230	0.807206	24.1629
BERNOULLI	BSD68	10	240	0.760727	22.7299
BERNOULLI	BSD68	32	150	0.943099	34.3748
BERNOULLI	BSD68	32	160	0.933676	33.6851
BERNOULLI	BSD68	32	170	0.924505	32.8747
BERNOULLI	BSD68	32	180	0.919222	32.5784
BERNOULLI	BSD68	32	190	0.90463	31.4595
BERNOULLI	BSD68	32	200	0.892272	31.0123
BERNOULLI	BSD68	32	210	0.879504	29.9439
BERNOULLI	BSD68	32	220	0.868348	29.6238
BERNOULLI	BSD68	32	230	0.844727	27.9851
BERNOULLI	BSD68	32	240	0.823047	26.8706
BERNOULLI	BSD68	23	150	0.968528	36.6347
BERNOULLI	BSD68	23	160	0.963081	35.7359
BERNOULLI	BSD68	23	170	0.958539	35.0115
BERNOULLI	BSD68	23	180	0.95371	34.7549
BERNOULLI	BSD68	23	190	0.944299	33.7098
BERNOULLI	BSD68	23	200	0.937344	33.257
BERNOULLI	BSD68	23	210	0.925333	32.2091
BERNOULLI	BSD68	23	220	0.911876	31.5776
BERNOULLI	BSD68	23	230	0.891996	30.5496
BERNOULLI	BSD68	23	240	0.853766	29.0569
BERNOULLI	BSD68	29	150	0.952396	31.0572
BERNOULLI	BSD68	29	160	0.943088	30.2277
BERNOULLI	BSD68	29	170	0.933014	29.413
BERNOULLI	BSD68	29	180	0.923208	28.8298
BERNOULLI	BSD68	29	190	0.90593	27.8421
BERNOULLI	BSD68	29	200	0.889649	27.0515
BERNOULLI	BSD68	29	210	0.865465	26.2141
BERNOULLI	BSD68	29	220	0.82851	25.0797
BERNOULLI	BSD68	29	230	0.776653	23.5715
BERNOULLI	BSD68	29	240	0.696447	22.0606
BERNOULLI	BSD68	63	150	0.979146	38.3441
BERNOULLI	BSD68	63	160	0.976266	37.5808
BERNOULLI	BSD68	63	170	0.973559	36.9742
BERNOULLI	BSD68	63	180	0.969718	35.9549
BERNOULLI	BSD68	63	190	0.965255	34.6155
BERNOULLI	BSD68	63	200	0.960911	33.6205
BERNOULLI	BSD68	63	210	0.954389	31.9003
BERNOULLI	BSD68	63	220	0.94448	30.6914
BERNOULLI	BSD68	63	230	0.926866	28.0456
BERNOULLI	BSD68	63	240	0.890296	24.4917
BERNOULLI	BSD68	57	150	0.770617	22.7276
BERNOULLI	BSD68	57	160	0.743733	22.2949
BERNOULLI	BSD68	57	170	0.715234	21.9179
BERNOULLI	BSD68	57	180	0.676242	21.3533
BERNOULLI	BSD68	57	190	0.639436	21.0302
BERNOULLI	BSD68	57	200	0.595354	20.62
BERNOULLI	BSD68	57	210	0.540593	20.0637
BERNOULLI	BSD68	57	220	0.481107	19.5887
BERNOULLI	BSD68	57	230	0.417308	19.0839
BERNOULLI	BSD68	57	240	0.339771	18.5044
BERNOULLI	BSD68	19	150	0.955199	33.9635
BERNOULLI	BSD68	19	160	0.948052	33.2978
BERNOULLI	BSD68	19	170	0.938521	32.6232
BERNOULLI	BSD68	19	180	0.925274	31.7898
BERNOULLI	BSD68	19	190	0.910913	31.0625
BERNOULLI	BSD68	19	200	0.894181	30.2466
BERNOULLI	BSD68	19	210	0.871542	29.5163
BERNOULLI	BSD68	19	220	0.838104	28.4398
BERNOULLI	BSD68	19	230	0.790186	27.4548
BERNOULLI	BSD68	19	240	0.708676	25.8306
BERNOULLI	BSD68	58	150	0.8885	29.3585
BERNOULLI	BSD68	58	160	0.874242	28.8278
BERNOULLI	BSD68	58	170	0.858649	28.3901
BERNOULLI	BSD68	58	180	0.840302	27.8349
BERNOULLI	BSD68	58	190	0.821778	27.3686
BERNOULLI	BSD68	58	200	0.79612	26.7848
BERNOULLI	BSD68	58	210	0.773741	26.2899
BERNOULLI	BSD68	58	220	0.740229	25.7562
BERNOULLI	BSD68	58	230	0.700732	25.043
BERNOULLI	BSD68	58	240	0.646141	24.1577
BERNOULLI	BSD68	66	150	0.926216	30.9504
BERNOULLI	BSD68	66	160	0.9149	30.2489
BERNOULLI	BSD68	66	170	0.901962	29.6037
BERNOULLI	BSD68	66	180	0.886467	28.9387
BERNOULLI	BSD68	66	190	0.867864	28.3371
BERNOULLI	BSD68	66	200	0.847499	27.6414
BERNOULLI	BSD68	66	210	0.823061	26.8968
BERNOULLI	BSD68	66	220	0.793133	26.1203
BERNOULLI	BSD68	66	230	0.753165	25.2407
BERNOULLI	BSD68	66	240	0.700498	23.9696
BERNOULLI	BSD68	56	150	0.903578	28.653
BERNOULLI	BSD68	56	160	0.884207	27.7025
BERNOULLI	BSD68	56	170	0.867707	27.2232
BERNOULLI	BSD68	56	180	0.847322	26.5056
BERNOULLI	BSD68	56	190	0.821917	25.7783
BERNOULLI	BSD68	56	200	0.790538	24.9264
BERNOULLI	BSD68	56	210	0.758631	24.1877
BERNOULLI	BSD68	56	220	0.711704	23.3889
BERNOULLI	BSD68	56	230	0.653592	22.2998
BERNOULLI	BSD68	56	240	0.563371	20.8951
BERNOULLI	BSD68	44	150	0.92282	29.9845
BERNOULLI	BSD68	44	160	0.911769	29.5516
BERNOULLI	BSD68	44	170	0.899358	28.9743
BERNOULLI	BSD68	44	180	0.88516	28.3401
BERNOULLI	BSD68	44	190	0.867949	27.542
BERNOULLI	BSD68	44	200	0.845189	26.8134
BERNOULLI	BSD68	44	210	0.818388	25.9689
BERNOULLI	BSD68	44	220	0.788779	25.1421
BERNOULLI	BSD68	44	230	0.746585	24.324
BERNOULLI	BSD68	44	240	0.684939	22.8771
BERNOULLI	BSD68	18	150	0.943137	30.0282
BERNOULLI	BSD68	18	160	0.93331	29.1773
BERNOULLI	BSD68	18	170	0.923836	28.6727
BERNOULLI	BSD68	18	180	0.912016	27.9338
BERNOULLI	BSD68	18	190	0.897025	27.0561
BERNOULLI	BSD68	18	200	0.876382	26.1873
BERNOULLI	BSD68	18	210	0.854691	25.4479
BERNOULLI	BSD68	18	220	0.823649	24.3308
BERNOULLI	BSD68	18	230	0.774028	23.1312
BERNOULLI	BSD68	18	240	0.66375	20.7113
BERNOULLI	BSD68	7	150	0.879326	23.9742
BERNOULLI	BSD68	7	160	0.861381	23.4732
BERNOULLI	BSD68	7	170	0.839452	22.7997
BERNOULLI	BSD68	7	180	0.817272	22.1819
BERNOULLI	BSD68	7	190	0.788046	21.6111
BERNOULLI	BSD68	7	200	0.753831	20.9065
BERNOULLI	BSD68	7	210	0.710504	20.1501
BERNOULLI	BSD68	7	220	0.651439	19.374
BERNOULLI	BSD68	7	230	0.581763	18.4509
BERNOULLI	BSD68	7	240	0.478782	17.3618
BERNOULLI	BSD68	6	150	0.970428	31.5029
BERNOULLI	BSD68	6	160	0.964507	30.735
BERNOULLI	BSD68	6	170	0.960227	30.0644
BERNOULLI	BSD68	6	180	0.950619	28.9554
BERNOULLI	BSD68	6	190	0.940745	28.0795
BERNOULLI	BSD68	6	200	0.927831	27.1409
BERNOULLI	BSD68	6	210	0.911554	26.1575
BERNOULLI	BSD68	6	220	0.884043	24.5792
BERNOULLI	BSD68	6	230	0.84058	22.8026
BERNOULLI	BSD68	6	240	0.773951	21.1029
BERNOULLI	BSD68	26	150	0.902022	25.0382
BERNOULLI	BSD68	26	160	0.888461	24.4506
BERNOULLI	BSD68	26	170	0.871939	23.8617
BERNOULLI	BSD68	26	180	0.850039	23.1619
BERNOULLI	BSD68	26	190	0.825984	22.4599
BERNOULLI	BSD68	26	200	0.792206	21.7311
BERNOULLI	BSD68	26	210	0.756084	21.0406
BERNOULLI	BSD68	26	220	0.7065	20.2101
BERNOULLI	BSD68	26	230	0.646989	19.2891
BERNOULLI	BSD68	26	240	0.546723	18.087
BERNOULLI	BSD68	1	150	0.927594	31.7739
BERNOULLI	BSD68	1	160	0.914114	30.9416
BERNOULLI	BSD68	1	170	0.901621	30.24
BERNOULLI	BSD68	1	180	0.88433	29.6278
BERNOULLI	BSD68	1	190	0.862987	28.6955
BERNOULLI	BSD68	1	200	0.834946	27.903
BERNOULLI	BSD68	1	210	0.8002	26.9208
BERNOULLI	BSD68	1	220	0.7457	25.6792
BERNOULLI	BSD68	1	230	0.678668	24.5251
BERNOULLI	BSD68	1	240	0.578065	23.1138
BERNOULLI	BSD68	21	150	0.89109	27.5479
BERNOULLI	BSD68	21	160	0.877054	27.0658
BERNOULLI	BSD68	21	170	0.855459	26.2289
BERNOULLI	BSD68	21	180	0.836104	25.8416
BERNOULLI	BSD68	21	190	0.809105	25.1069
BERNOULLI	BSD68	21	200	0.780963	24.6703
BERNOULLI	BSD68	21	210	0.745105	23.9462
BERNOULLI	BSD68	21	220	0.70184	23.2932
BERNOULLI	BSD68	21	230	0.649791	22.5593
BERNOULLI	BSD68	21	240	0.575985	21.501
BERNOULLI	BSD68	53	150	0.935647	35.2375
BERNOULLI	BSD68	53	160	0.926924	34.6941
BERNOULLI	BSD68	53	170	0.91855	34.2036
BERNOULLI	BSD68	53	180	0.909082	33.7225
BERNOULLI	BSD68	53	190	0.896843	33.1323
BERNOULLI	BSD68	53	200	0.884043	32.464
BERNOULLI	BSD68	53	210	0.867094	31.6641
BERNOULLI	BSD68	53	220	0.846985	30.9754
BERNOULLI	BSD68	53	230	0.828271	30.2188
BERNOULLI	BSD68	53	240	0.791607	29.0994
BERNOULLI	BSD68	30	150	0.955435	30.499
BERNOULLI	BSD68	30	160	0.947272	29.7642
BERNOULLI	BSD68	30	170	0.938668	28.9537
BERNOULLI	BSD68	30	180	0.929688	28.4159
BERNOULLI	BSD68	30	190	0.916858	27.5995
BERNOULLI	BSD68	30	200	0.90389	26.9159
BERNOULLI	BSD68	30	210	0.886364	26.1578
BERNOULLI	BSD68	30	220	0.864022	25.2297
BERNOULLI	BSD68	30	230	0.82723	23.9373
BERNOULLI	BSD68	30	240	0.780218	22.6996
BERNOULLI	BSD68	3	150	0.919414	31.0153
BERNOULLI	BSD68	3	160	0.905822	30.2306
BERNOULLI	BSD68	3	170	0.892286	29.732
BERNOULLI	BSD68	3	180	0.8799	29.0928
BERNOULLI	BSD68	3	190	0.861805	28.6149
BERNOULLI	BSD68	3	200	0.83805	27.7859
BERNOULLI	BSD68	3	210	0.813007	27.086
BERNOULLI	BSD68	3	220	0.779324	26.1851
BERNOULLI	BSD68	3	230	0.735032	25.204
BERNOULLI	BSD68	3	240	0.655637	23.7043
BERNOULLI	BSD68	36	150	0.914344	28.5483
BERNOULLI	BSD68	36	160	0.901452	27.9198
BERNOULLI	BSD68	36	170	0.883693	27.128
BERNOULLI	BSD68	36	180	0.865005	26.5392
BERNOULLI	BSD68	36	190	0.839085	25.7732
BERNOULLI	BSD68	36	200	0.80378	24.9041
BERNOULLI	BSD68	36	210	0.766529	24.2102
BERNOULLI	BSD68	36	220	0.719249	23.3643
BERNOULLI	BSD68	36	230	0.641306	22.3323
BERNOULLI	BSD68	36	240	0.531096	21.0821
BERNOULLI	BSD68	20	150	0.937117	32.7005
BERNOULLI	BSD68	20	160	0.929069	32.007
BERNOULLI	BSD68	20	170	0.920408	31.5696
BERNOULLI	BSD68	20	180	0.909156	30.7956
BERNOULLI	BSD68	20	190	0.893534	29.8911
BERNOULLI	BSD68	20	200	0.878431	29.4105
BERNOULLI	BSD68	20	210	0.859607	28.3893
BERNOULLI	BSD68	20	220	0.834517	27.6584
BERNOULLI	BSD68	20	230	0.796194	26.2428
BERNOULLI	BSD68	20	240	0.752072	25.0977
BERNOULLI	BSD68	34	150	0.952384	33.8489
BERNOULLI	BSD68	34	160	0.943102	32.9534
BERNOULLI	BSD68	34	170	0.933663	32.29
BERNOULLI	BSD68	34	180	0.924106	31.6491
BERNOULLI	BSD68	34	190	0.908173	30.732
BERNOULLI	BSD68	34	200	0.89315	30.0004
BERNOULLI	BSD68	34	210	0.865468	28.9946
BERNOULLI	BSD68	34	220	0.829956	27.9262
BERNOULLI	BSD68	34	230	0.78471	26.7978
BERNOULLI	BSD68	34	240	0.704129	25.4076
BERNOULLI	BSD68	28	150	0.948255	29.259
BERNOULLI	BSD68	28	160	0.940108	28.6638
BERNOULLI	BSD68	28	170	0.927921	27.8953
BERNOULLI	BSD68	28	180	0.915503	27.3049
BERNOULLI	BSD68	28	190	0.901418	26.6743
BERNOULLI	BSD68	28	200	0.883188	25.914
BERNOULLI	BSD68	28	210	0.862899	25.3854
BERNOULLI	BSD68	28	220	0.827217	24.4571
BERNOULLI	BSD68	28	230	0.775553	23.3843
BERNOULLI	BSD68	28	240	0.70197	22.2549
BERNOULLI	BSD68	5	150	0.902669	30.1298
BERNOULLI	BSD68	5	160	0.889791	29.5073
BERNOULLI	BSD68	5	170	0.87841	28.9889
BERNOULLI	BSD68	5	180	0.86524	28.4249
BERNOULLI	BSD68	5	190	0.846579	27.6438
BERNOULLI	BSD68	5	200	0.825534	26.7963
BERNOULLI	BSD68	5	210	0.805247	26.1613
BERNOULLI	BSD68	5	220	0.774679	25.1635
BERNOULLI	BSD68	5	230	0.732492	24.1108
BERNOULLI	BSD68	5	240	0.665049	22.6532
BERNOULLI	BSD68	43	150	0.897782	28.395
BERNOULLI	BSD68	43	160	0.884981	27.9444
BERNOULLI	BSD68	43	170	0.8696	27.2626
BERNOULLI	BSD68	43	180	0.848966	26.6059
BERNOULLI	BSD68	43	190	0.828513	25.9372
BERNOULLI	BSD68	43	200	0.806324	25.3334
BERNOULLI	BSD68	43	210	0.777453	24.6423
BERNOULLI	BSD68	43	220	0.742629	23.9601
BERNOULLI	BSD68	43	230	0.695706	23.0699
BERNOULLI	BSD68	43	240	0.628349	21.7947
BERNOULLI	BSD68	55	150	0.940263	32.0223
BERNOULLI	BSD68	55	160	0.931135	31.3198
BERNOULLI	BSD68	55	170	0.919156	30.6495
BERNOULLI	BSD68	55	180	0.904575	29.6922
BERNOULLI	BSD68	55	190	0.888104	28.8919
BERNOULLI	BSD68	55	200	0.870072	28.0865
BERNOULLI	BSD68	55	210	0.840883	27.1012
BERNOULLI	BSD68	55	220	0.804535	25.8562
BERNOULLI	BSD68	55	230	0.758492	24.9543
BERNOULLI	BSD68	55	240	0.676367	23.26
BERNOULLI	BSD68	67	150	0.865116	24.5014
BERNOULLI	BSD68	67	160	0.844197	23.8528
BERNOULLI	BSD68	67	170	0.828312	23.5601
BERNOULLI	BSD68	67	180	0.807276	23.0082
BERNOULLI	BSD68	67	190	0.779906	22.4691
BERNOULLI	BSD68	67	200	0.753157	21.9596
BERNOULLI	BSD68	67	210	0.714303	21.263
BERNOULLI	BSD68	67	220	0.674211	20.6979
BERNOULLI	BSD68	67	230	0.632847	20.2026
BERNOULLI	BSD68	67	240	0.563029	19.1012
BERNOULLI	BSD68	41	150	0.942669	32.8968
BERNOULLI	BSD68	41	160	0.931889	32.0132
BERNOULLI	BSD68	41	170	0.919352	31.3857
BERNOULLI	BSD68	41	180	0.903974	30.6276
BERNOULLI	BSD68	41	190	0.88777	29.9536
BERNOULLI	BSD68	41	200	0.861785	29.0051
BERNOULLI	BSD68	41	210	0.829641	28.1281
BERNOULLI	BSD68	41	220	0.783401	27.0696
BERNOULLI	BSD68	41	230	0.723091	25.9399
BERNOULLI	BSD68	41	240	0.635942	24.6618
BERNOULLI	BSD68	0	150	0.98905	42.7654
BERNOULLI	BSD68	0	160	0.988097	42.2154
BERNOULLI	BSD68	0	170	0.986995	41.7715
BERNOULLI	BSD68	0	180	0.985045	40.0492
BERNOULLI	BSD68	0	190	0.984345	40.5289
BERNOULLI	BSD68	0	200	0.981142	38.7527
BERNOULLI	BSD68	0	210	0.978161	37.6723
BERNOULLI	BSD68	0	220	0.973716	36.2305
BERNOULLI	BSD68	0	230	0.966819	34.1225
BERNOULLI	BSD68	0	240	0.959239	33.2032
BERNOULLI	BSD68	13	150	0.966153	37.3915
BERNOULLI	BSD68	13	160	0.961046	36.7134
BERNOULLI	BSD68	13	170	0.95662	36.1849
BERNOULLI	BSD68	13	180	0.950463	35.5812
BERNOULLI	BSD68	13	190	0.943037	34.9641
BERNOULLI	BSD68	13	200	0.934636	34.1431
BERNOULLI	BSD68	13	210	0.924091	33.5311
BERNOULLI	BSD68	13	220	0.907965	32.3595
BERNOULLI	BSD68	13	230	0.889964	31.4693
BERNOULLI	BSD68	13	240	0.857323	29.2252
BERNOULLI	BSD68	48	150	0.873141	25.5278
BERNOULLI	BSD68	48	160	0.852451	24.7378
BERNOULLI	BSD68	48	170	0.833252	24.254
BERNOULLI	BSD68	48	180	0.806101	23.5613
BERNOULLI	BSD68	48	190	0.780223	22.9754
BERNOULLI	BSD68	48	200	0.745975	22.2652
BERNOULLI	BSD68	48	210	0.703439	21.5558
BERNOULLI	BSD68	48	220	0.654858	20.889
BERNOULLI	BSD68	48	230	0.578767	19.8666
BERNOULLI	BSD68	48	240	0.480073	18.6933
BERNOULLI	BSD68	45	150	0.970683	32.3985
BERNOULLI	BSD68	45	160	0.964892	31.6093
BERNOULLI	BSD68	45	170	0.959465	30.7844
BERNOULLI	BSD68	45	180	0.951395	29.7275
BERNOULLI	BSD68	45	190	0.9433	29.0317
BERNOULLI	BSD68	45	200	0.926248	27.599
BERNOULLI	BSD68	45	210	0.914237	27.2221
BERNOULLI	BSD68	45	220	0.888442	25.4447
BERNOULLI	BSD68	45	230	0.853876	24.2039
BERNOULLI	BSD68	45	240	0.794016	22.6551
BERNOULLI	BSD68	54	150	0.917792	34.8817
BERNOULLI	BSD68	54	160	0.906127	34.3348
BERNOULLI	BSD68	54	170	0.895407	33.8691
BERNOULLI	BSD68	54	180	0.882196	33.2596
BERNOULLI	BSD68	54	190	0.866482	32.7005
BERNOULLI	BSD68	54	200	0.84746	32.2233
BERNOULLI	BSD68	54	210	0.830905	31.7273
BERNOULLI	BSD68	54	220	0.805127	31.1141
BERNOULLI	BSD68	54	230	0.770321	30.3791
BERNOULLI	BSD68	54	240	0.72337	29.2751
BERNOULLI	BSD68	60	150	0.906018	32.9381
BERNOULLI	BSD68	60	160	0.891168	32.2933
BERNOULLI	BSD68	60	170	0.880025	31.9615
BERNOULLI	BSD68	60	180	0.866955	31.5176
BERNOULLI	BSD68	60	190	0.850728	30.9779
BERNOULLI	BSD68	60	200	0.831978	30.5106
BERNOULLI	BSD68	60	210	0.811675	29.8773
BERNOULLI	BSD68	60	220	0.78697	29.3761
BERNOULLI	BSD68	60	230	0.757392	28.5382
BERNOULLI	BSD68	60	240	0.71453	27.5371
BERNOULLI	BSD68	39	150	0.74992	29.0343
BERNOULLI	BSD68	39	160	0.724293	28.7152
BERNOULLI	BSD68	39	170	0.694137	28.3121
BERNOULLI	BSD68	39	180	0.667572	27.9835
BERNOULLI	BSD68	39	190	0.633709	27.6624
BERNOULLI	BSD68	39	200	0.598993	27.3129
BERNOULLI	BSD68	39	210	0.557634	26.9464
BERNOULLI	BSD68	39	220	0.521037	26.6642
BERNOULLI	BSD68	39	230	0.482086	26.2829
BERNOULLI	BSD68	39	240	0.434755	25.6874
BERNOULLI	BSD68	11	150	0.964333	34.7011
BERNOULLI	BSD68	11	160	0.959826	34.1968
BERNOULLI	BSD68	11	170	0.951758	33.5084
BERNOULLI	BSD68	11	180	0.944625	32.9058
BERNOULLI	BSD68	11	190	0.932396	31.9841
BERNOULLI	BSD68	11	200	0.918281	31.2518
BERNOULLI	BSD68	11	210	0.898276	30.2282
BERNOULLI	BSD68	11	220	0.871155	29.3219
BERNOULLI	BSD68	11	230	0.842716	28.5626
BERNOULLI	BSD68	11	240	0.773618	26.6798
BERNOULLI	BSD68	4	150	0.904655	29.361
BERNOULLI	BSD68	4	160	0.891053	28.6698
BERNOULLI	BSD68	4	170	0.878092	28.1836
BERNOULLI	BSD68	4	180	0.85896	27.4265
BERNOULLI	BSD68	4	190	0.840903	26.8921
BERNOULLI	BSD68	4	200	0.819874	26.172
BERNOULLI	BSD68	4	210	0.788544	25.4427
BERNOULLI	BSD68	4	220	0.755597	24.5717
BERNOULLI	BSD68	4	230	0.710983	23.7752
BERNOULLI	BSD68	4	240	0.643034	22.1765
BERNOULLI	BSD68	31	150	0.946702	33.8546
BERNOULLI	BSD68	31	160	0.936692	32.9582
BERNOULLI	BSD68	31	170	0.928722	32.4347
BERNOULLI	BSD68	31	180	0.915635	31.6701
BERNOULLI	BSD68	31	190	0.902206	30.9677
BERNOULLI	BSD68	31	200	0.884522	30.154
BERNOULLI	BSD68	31	210	0.861654	29.2914
BERNOULLI	BSD68	31	220	0.82845	28.1801
BERNOULLI	BSD68	31	230	0.788801	27.2079
BERNOULLI	BSD68	31	240	0.730548	25.8896
BERNOULLI	BSD68	27	150	0.904994	28.2198
BERNOULLI	BSD68	27	160	0.891277	27.4905
BERNOULLI	BSD68	27	170	0.872283	26.687
BERNOULLI	BSD68	27	180	0.850333	25.9794
BERNOULLI	BSD68	27	190	0.829091	25.3637
BERNOULLI	BSD68	27	200	0.797346	24.6281
BERNOULLI	BSD68	27	210	0.756915	23.6955
BERNOULLI	BSD68	27	220	0.705884	22.7085
BERNOULLI	BSD68	27	230	0.637459	21.5536
BERNOULLI	BSD68	27	240	0.53994	20.3946
BERNOULLI	BSD68	59	150	0.9112	33.9293
BERNOULLI	BSD68	59	160	0.899019	33.4132
BERNOULLI	BSD68	59	170	0.888184	32.9361
BERNOULLI	BSD68	59	180	0.872469	32.4217
BERNOULLI	BSD68	59	190	0.859666	32.0486
BERNOULLI	BSD68	59	200	0.841114	31.5066
BERNOULLI	BSD68	59	210	0.823306	31.0552
BERNOULLI	BSD68	59	220	0.799139	30.4082
BERNOULLI	BSD68	59	230	0.772942	29.8885
BERNOULLI	BSD68	59	240	0.732505	28.8296
BERNOULLI	BSD68	37	150	0.923259	27.1829
BERNOULLI	BSD68	37	160	0.912718	26.7037
BERNOULLI	BSD68	37	170	0.901328	26.1592
BERNOULLI	BSD68	37	180	0.886793	25.5961
BERNOULLI	BSD68	37	190	0.875138	25.1753
BERNOULLI	BSD68	37	200	0.855041	24.5705
BERNOULLI	BSD68	37	210	0.835391	23.999
BERNOULLI	BSD68	37	220	0.812368	23.4398
BERNOULLI	BSD68	37	230	0.772231	22.5363
BERNOULLI	BSD68	37	240	0.712842	21.3414
BERNOULLI	BSD68	47	150	0.961557	38.6955
BERNOULLI	BSD68	47	160	0.9563	38.1334
BERNOULLI	BSD68	47	170	0.950575	37.5797
BERNOULLI	BSD68	47	180	0.944062	37.0492
BERNOULLI	BSD68	47	190	0.934668	36.2904
BERNOULLI	BSD68	47	200	0.925697	35.7528
BERNOULLI	BSD68	47	210	0.910194	34.738
BERNOULLI	BSD68	47	220	0.892207	33.9417
BERNOULLI	BSD68	47	230	0.869487	33.0079
BERNOULLI	BSD68	47	240	0.831823	31.6574
BERNOULLI	BSD68	12	150	0.908159	28.6193
BERNOULLI	BSD68	12	160	0.895706	28.0778
BERNOULLI	BSD68	12	170	0.879556	27.5287
BERNOULLI	BSD68	12	180	0.859564	26.9575
BERNOULLI	BSD68	12	190	0.839905	26.4135
BERNOULLI	BSD68	12	200	0.815872	25.8366
BERNOULLI	BSD68	12	210	0.781512	25.1295
BERNOULLI	BSD68	12	220	0.745955	24.4769
BERNOULLI	BSD68	12	230	0.695366	23.6967
BERNOULLI	BSD68	12	240	0.626978	22.6962
BERNOULLI	BSD68	50	150	0.925902	34.2006
BERNOULLI	BSD68	50	160	0.916674	33.6525
BERNOULLI	BSD68	50	170	0.906491	33.105
BERNOULLI	BSD68	50	180	0.896012	32.5169
BERNOULLI	BSD68	50	190	0.881331	31.9791
BERNOULLI	BSD68	50	200	0.869286	31.4864
BERNOULLI	BSD68	50	210	0.851469	30.7634
BERNOULLI	BSD68	50	220	0.830927	30.1366
BERNOULLI	BSD68	50	230	0.803214	29.2864
BERNOULLI	BSD68	50	240	0.770238	28.2891
BERNOULLI	BSD68	65	150	0.852169	28.1788
BERNOULLI	BSD68	65	160	0.8341	27.6675
BERNOULLI	BSD68	65	170	0.813922	27.1871
BERNOULLI	BSD68	65	180	0.787448	26.6566
BERNOULLI	BSD68	65	190	0.760666	26.1034
BERNOULLI	BSD68	65	200	0.726775	25.4632
BERNOULLI	BSD68	65	210	0.688587	24.8238
BERNOULLI	BSD68	65	220	0.646407	24.1608
BERNOULLI	BSD68	65	230	0.579643	23.2889
BERNOULLI	BSD68	65	240	0.507885	22.3571
BERNOULLI	BSD68	42	150	0.987279	41.0097
BERNOULLI	BSD68	42	160	0.985765	40.155
BERNOULLI	BSD68	42	170	0.983056	39.2114
BERNOULLI	BSD68	42	180	0.980665	38.2402
BERNOULLI	BSD68	42	190	0.976976	36.7563
BERNOULLI	BSD68	42	200	0.971956	35.5738
BERNOULLI	BSD68	42	210	0.96516	33.8233
BERNOULLI	BSD68	42	220	0.953529	32.4732
BERNOULLI	BSD68	42	230	0.928514	29.7024
BERNOULLI	BSD68	42	240	0.872274	26.9845
BERNOULLI	BSD68	40	150	0.889022	30.1735
BERNOULLI	BSD68	40	160	0.874855	29.6974
BERNOULLI	BSD68	40	170	0.859963	29.1059
BERNOULLI	BSD68	40	180	0.842842	28.5832
BERNOULLI	BSD68	40	190	0.823536	28.1024
BERNOULLI	BSD68	40	200	0.79905	27.3893
BERNOULLI	BSD68	40	210	0.774903	26.8642
BERNOULLI	BSD68	40	220	0.740578	26.2259
BERNOULLI	BSD68	40	230	0.700708	25.4628
BERNOULLI	BSD68	40	240	0.642993	24.2968
BERNOULLI	BSD68	64	150	0.908155	26.918
BERNOULLI	BSD68	64	160	0.89624	26.5129
BERNOULLI	BSD68	64	170	0.879615	25.8523
BERNOULLI	BSD68	64	180	0.862306	25.2923
BERNOULLI	BSD68	64	190	0.836594	24.615
BERNOULLI	BSD68	64	200	0.804567	23.8979
BERNOULLI	BSD68	64	210	0.771679	23.4111
BERNOULLI	BSD68	64	220	0.728045	22.6179
BERNOULLI	BSD68	64	230	0.656082	21.7399
BERNOULLI	BSD68	64	240	0.555868	20.5963
BERNOULLI	BSD68	2	150	0.957489	37.1093
BERNOULLI	BSD68	2	160	0.95062	36.3204
BERNOULLI	BSD68	2	170	0.945259	35.9816
BERNOULLI	BSD68	2	180	0.9384	35.3772
BERNOULLI	BSD68	2	190	0.929948	34.7305
BERNOULLI	BSD68	2	200	0.920181	34.0127
BERNOULLI	BSD68	2	210	0.907778	33.4821
BERNOULLI	BSD68	2	220	0.894634	32.6986
BERNOULLI	BSD68	2	230	0.869403	31.5503
BERNOULLI	BSD68	2	240	0.836199	29.9111
BERNOULLI	BSD68	14	150	0.945601	30.7766
BERNOULLI	BSD68	14	160	0.935942	29.9206
BERNOULLI	BSD68	14	170	0.924797	29.4424
BERNOULLI	BSD68	14	180	0.91111	28.5403
BERNOULLI	BSD68	14	190	0.893794	27.5455
BERNOULLI	BSD68	14	200	0.868602	26.8019
BERNOULLI	BSD68	14	210	0.842328	25.9411
BERNOULLI	BSD68	14	220	0.799501	24.9151
BERNOULLI	BSD68	14	230	0.74204	23.7124
BERNOULLI	BSD68	14	240	0.648315	22.2592
BERNOULLI	BSD68	24	150	0.890615	28.1125
BERNOULLI	BSD68	24	160	0.874719	27.4326
BERNOULLI	BSD68	24	170	0.862876	27.0519
BERNOULLI	BSD68	24	180	0.846323	26.6057
BERNOULLI	BSD68	24	190	0.828663	26.1367
BERNOULLI	BSD68	24	200	0.80594	25.4725
BERNOULLI	BSD68	24	210	0.783992	25.0184
BERNOULLI	BSD68	24	220	0.750736	24.2331
BERNOULLI	BSD68	24	230	0.714841	23.5582
BERNOULLI	BSD68	24	240	0.655827	22.1038
BERNOULLI	Set12	10	150	0.91937	33.242
BERNOULLI	Set12	10	160	0.911413	32.7629
BERNOULLI	Set12	10	170	0.900057	31.7783
BERNOULLI	Set12	10	180	0.891251	31.4352
BERNOULLI	Set12	10	190	0.877932	30.6028
BERNOULLI	Set12	10	200	0.861421	29.7853
BERNOULLI	Set12	10	210	0.838512	28.7658
BERNOULLI	Set12	10	220	0.809206	27.7885
BERNOULLI	Set12	10	230	0.768133	26.4998
BERNOULLI	Set12	10	240	0.699824	24.8036
BERNOULLI	Set12	12	150	0.938943	33.2468
BERNOULLI	Set12	12	160	0.930935	32.571
BERNOULLI	Set12	12	170	0.922364	31.8381
BERNOULLI	Set12	12	180	0.909918	31.0107
BERNOULLI	Set12	12	190	0.897113	30.3793
BERNOULLI	Set12	12	200	0.88063	29.4993
BERNOULLI	Set12	12	210	0.85826	28.6347
BERNOULLI	Set12	12	220	0.828402	27.5212
BERNOULLI	Set12	12	230	0.781991	26.2264
BERNOULLI	Set12	12	240	0.706397	24.801
BERNOULLI	Set12	1	150	0.927366	29.5961
BERNOULLI	Set12	1	160	0.919159	28.9577
BERNOULLI	Set12	1	170	0.912533	28.7228
BERNOULLI	Set12	1	180	0.900415	28.1348
BERNOULLI	Set12	1	190	0.886227	27.2413
BERNOULLI	Set12	1	200	0.870608	25.9803
BERNOULLI	Set12	1	210	0.851926	25.309
BERNOULLI	Set12	1	220	0.826576	24.3966
BERNOULLI	Set12	1	230	0.791366	23.1458
BERNOULLI	Set12	1	240	0.738841	21.3429
BERNOULLI	Set12	4	150	0.95665	32.8414
BERNOULLI	Set12	4	160	0.950906	32.0423
BERNOULLI	Set12	4	170	0.941279	31.1934
BERNOULLI	Set12	4	180	0.932294	30.3968
BERNOULLI	Set12	4	190	0.91704	29.2481
BERNOULLI	Set12	4	200	0.905046	28.4132
BERNOULLI	Set12	4	210	0.875109	26.8417
BERNOULLI	Set12	4	220	0.847973	25.6743
BERNOULLI	Set12	4	230	0.797082	23.8169
BERNOULLI	Set12	4	240	0.705934	21.7431
BERNOULLI	Set12	3	150	0.947031	25.214
BERNOULLI	Set12	3	160	0.943542	25.1321
BERNOULLI	Set12	3	170	0.937503	25.0494
BERNOULLI	Set12	3	180	0.928656	24.8192
BERNOULLI	Set12	3	190	0.921976	24.64
BERNOULLI	Set12	3	200	0.912756	24.4345
BERNOULLI	Set12	3	210	0.898762	24.2274
BERNOULLI	Set12	3	220	0.881487	23.7992
BERNOULLI	Set12	3	230	0.850349	23.1205
BERNOULLI	Set12	3	240	0.799089	21.9251
BERNOULLI	Set12	9	150	0.950845	32.0079
BERNOULLI	Set12	9	160	0.942713	31.1196
BERNOULLI	Set12	9	170	0.931581	30.2794
BERNOULLI	Set12	9	180	0.919672	29.3514
BERNOULLI	Set12	9	190	0.904044	28.5019
BERNOULLI	Set12	9	200	0.881963	27.6199
BERNOULLI	Set12	9	210	0.851901	26.5099
BERNOULLI	Set12	9	220	0.806916	25.2798
BERNOULLI	Set12	9	230	0.749894	24.1502
BERNOULLI	Set12	9	240	0.689223	23.0213
BERNOULLI	Set12	6	150	0.925989	28.622
BERNOULLI	Set12	6	160	0.920597	28.3685
BERNOULLI	Set12	6	170	0.90954	27.5902
BERNOULLI	Set12	6	180	0.896611	26.9421
BERNOULLI	Set12	6	190	0.8818	26.1869
BERNOULLI	Set12	6	200	0.864521	25.0372
BERNOULLI	Set12	6	210	0.841491	24.6191
BERNOULLI	Set12	6	220	0.820625	23.9631
BERNOULLI	Set12	6	230	0.784702	23.0224
BERNOULLI	Set12	6	240	0.719224	21.1395
BERNOULLI	Set12	5	150	0.971954	32.3203
BERNOULLI	Set12	5	160	0.967364	31.5561
BERNOULLI	Set12	5	170	0.963384	30.966
BERNOULLI	Set12	5	180	0.959242	30.4941
BERNOULLI	Set12	5	190	0.949146	29.2403
BERNOULLI	Set12	5	200	0.938858	28.1339
BERNOULLI	Set12	5	210	0.92697	27.0541
BERNOULLI	Set12	5	220	0.904856	25.7636
BERNOULLI	Set12	5	230	0.871235	24.2377
BERNOULLI	Set12	5	240	0.793133	21.529
BERNOULLI	Set12	11	150	0.939584	33.3839
BERNOULLI	Set12	11	160	0.931372	32.7386
BERNOULLI	Set12	11	170	0.920833	32.0704
BERNOULLI	Set12	11	180	0.910341	31.5338
BERNOULLI	Set12	11	190	0.894245	30.7039
BERNOULLI	Set12	11	200	0.876481	30.0887
BERNOULLI	Set12	11	210	0.856665	29.2585
BERNOULLI	Set12	11	220	0.828838	28.3921
BERNOULLI	Set12	11	230	0.784079	27.1157
BERNOULLI	Set12	11	240	0.71921	25.4665
BERNOULLI	Set12	2	150	0.952306	37.8289
BERNOULLI	Set12	2	160	0.944496	36.8329
BERNOULLI	Set12	2	170	0.937597	36.3808
BERNOULLI	Set12	2	180	0.927502	35.6204
BERNOULLI	Set12	2	190	0.918124	34.7769
BERNOULLI	Set12	2	200	0.908838	33.8169
BERNOULLI	Set12	2	210	0.893116	32.8966
BERNOULLI	Set12	2	220	0.879071	31.7854
BERNOULLI	Set12	2	230	0.854887	29.7545
BERNOULLI	Set12	2	240	0.820594	27.9258
BERNOULLI	Set12	7	150	0.93991	29.4061
BERNOULLI	Set12	7	160	0.931974	28.3755
BERNOULLI	Set12	7	170	0.926237	28.183
BERNOULLI	Set12	7	180	0.915552	27.4322
BERNOULLI	Set12	7	190	0.903724	26.8506
BERNOULLI	Set12	7	200	0.887497	25.8509
BERNOULLI	Set12	7	210	0.869125	24.5881
BERNOULLI	Set12	7	220	0.849687	24.0138
BERNOULLI	Set12	7	230	0.814004	22.1724
BERNOULLI	Set12	7	240	0.751761	19.7635
BERNOULLI	Set12	8	150	0.951456	36.7419
BERNOULLI	Set12	8	160	0.946303	36.2335
BERNOULLI	Set12	8	170	0.940344	35.4996
BERNOULLI	Set12	8	180	0.933277	34.8133
BERNOULLI	Set12	8	190	0.92536	34.0371
BERNOULLI	Set12	8	200	0.915897	33.1638
BERNOULLI	Set12	8	210	0.903777	32.2686
BERNOULLI	Set12	8	220	0.888233	31.335
BERNOULLI	Set12	8	230	0.862754	29.7707
BERNOULLI	Set12	8	240	0.824177	27.9494
BERNOULLI	Urban100	img_079_SRF_2_HR	150	0.942041	29.9032
BERNOULLI	Urban100	img_079_SRF_2_HR	160	0.932677	29.2591
BERNOULLI	Urban100	img_079_SRF_2_HR	170	0.921578	28.4918
BERNOULLI	Urban100	img_079_SRF_2_HR	180	0.907342	27.8247
BERNOULLI	Urban100	img_079_SRF_2_HR	190	0.892219	27.1248
BERNOULLI	Urban100	img_079_SRF_2_HR	200	0.870676	26.3413
BERNOULLI	Urban100	img_079_SRF_2_HR	210	0.844263	25.4971
BERNOULLI	Urban100	img_079_SRF_2_HR	220	0.808149	24.5652
BERNOULLI	Urban100	img_079_SRF_2_HR	230	0.756397	23.4819
BERNOULLI	Urban100	img_079_SRF_2_HR	240	0.659006	21.9046
BERNOULLI	Urban100	img_013_SRF_2_HR	150	0.961104	32.2972
BERNOULLI	Urban100	img_013_SRF_2_HR	160	0.95406	31.6552
BERNOULLI	Urban100	img_013_SRF_2_HR	170	0.945658	30.8576
BERNOULLI	Urban100	img_013_SRF_2_HR	180	0.936305	29.8266
BERNOULLI	Urban100	img_013_SRF_2_HR	190	0.922393	29.2003
BERNOULLI	Urban100	img_013_SRF_2_HR	200	0.905699	27.9093
BERNOULLI	Urban100	img_013_SRF_2_HR	210	0.883493	26.8867
BERNOULLI	Urban100	img_013_SRF_2_HR	220	0.852319	25.7415
BERNOULLI	Urban100	img_013_SRF_2_HR	230	0.800337	24.2174
BERNOULLI	Urban100	img_013_SRF_2_HR	240	0.707207	22.008
BERNOULLI	Urban100	img_084_SRF_2_HR	150	0.95138	32.0586
BERNOULLI	Urban100	img_084_SRF_2_HR	160	0.944583	31.4145
BERNOULLI	Urban100	img_084_SRF_2_HR	170	0.934033	30.4815
BERNOULLI	Urban100	img_084_SRF_2_HR	180	0.923716	29.8676
BERNOULLI	Urban100	img_084_SRF_2_HR	190	0.907119	28.9291
BERNOULLI	Urban100	img_084_SRF_2_HR	200	0.891385	28.081
BERNOULLI	Urban100	img_084_SRF_2_HR	210	0.860781	27.017
BERNOULLI	Urban100	img_084_SRF_2_HR	220	0.825066	25.8822
BERNOULLI	Urban100	img_084_SRF_2_HR	230	0.759817	24.3397
BERNOULLI	Urban100	img_084_SRF_2_HR	240	0.650146	22.4903
BERNOULLI	Urban100	img_096_SRF_2_HR	150	0.971197	30.8532
BERNOULLI	Urban100	img_096_SRF_2_HR	160	0.965358	30.0107
BERNOULLI	Urban100	img_096_SRF_2_HR	170	0.959441	29.1572
BERNOULLI	Urban100	img_096_SRF_2_HR	180	0.951981	28.4577
BERNOULLI	Urban100	img_096_SRF_2_HR	190	0.941685	27.5371
BERNOULLI	Urban100	img_096_SRF_2_HR	200	0.925983	26.4144
BERNOULLI	Urban100	img_096_SRF_2_HR	210	0.909222	25.4792
BERNOULLI	Urban100	img_096_SRF_2_HR	220	0.873592	24.0455
BERNOULLI	Urban100	img_096_SRF_2_HR	230	0.825045	22.6994
BERNOULLI	Urban100	img_096_SRF_2_HR	240	0.732109	20.5866
BERNOULLI	Urban100	img_034_SRF_2_HR	150	0.879134	27.6508
BERNOULLI	Urban100	img_034_SRF_2_HR	160	0.863396	26.8761
BERNOULLI	Urban100	img_034_SRF_2_HR	170	0.846523	26.1716
BERNOULLI	Urban100	img_034_SRF_2_HR	180	0.828449	25.5495
BERNOULLI	Urban100	img_034_SRF_2_HR	190	0.80278	24.7183
BERNOULLI	Urban100	img_034_SRF_2_HR	200	0.777099	23.9736
BERNOULLI	Urban100	img_034_SRF_2_HR	210	0.740783	22.9987
BERNOULLI	Urban100	img_034_SRF_2_HR	220	0.697169	21.9386
BERNOULLI	Urban100	img_034_SRF_2_HR	230	0.634244	20.6779
BERNOULLI	Urban100	img_034_SRF_2_HR	240	0.529554	18.9264
BERNOULLI	Urban100	img_099_SRF_2_HR	150	0.800034	8.88954
BERNOULLI	Urban100	img_099_SRF_2_HR	160	0.788895	8.96629
BERNOULLI	Urban100	img_099_SRF_2_HR	170	0.778736	9.03135
BERNOULLI	Urban100	img_099_SRF_2_HR	180	0.761009	9.09961
BERNOULLI	Urban100	img_099_SRF_2_HR	190	0.739605	9.17142
BERNOULLI	Urban100	img_099_SRF_2_HR	200	0.710244	9.22088
BERNOULLI	Urban100	img_099_SRF_2_HR	210	0.675393	9.26885
BERNOULLI	Urban100	img_099_SRF_2_HR	220	0.621205	9.25661
BERNOULLI	Urban100	img_099_SRF_2_HR	230	0.540084	9.17534
BERNOULLI	Urban100	img_099_SRF_2_HR	240	0.446628	9.035
BERNOULLI	Urban100	img_024_SRF_2_HR	150	0.959246	27.0374
BERNOULLI	Urban100	img_024_SRF_2_HR	160	0.949351	25.9775
BERNOULLI	Urban100	img_024_SRF_2_HR	170	0.942259	25.3966
BERNOULLI	Urban100	img_024_SRF_2_HR	180	0.92969	24.7821
BERNOULLI	Urban100	img_024_SRF_2_HR	190	0.91286	24.0744
BERNOULLI	Urban100	img_024_SRF_2_HR	200	0.892432	23.1404
BERNOULLI	Urban100	img_024_SRF_2_HR	210	0.860876	21.9237
BERNOULLI	Urban100	img_024_SRF_2_HR	220	0.811475	20.5372
BERNOULLI	Urban100	img_024_SRF_2_HR	230	0.734152	18.9765
BERNOULLI	Urban100	img_024_SRF_2_HR	240	0.606357	16.9575
BERNOULLI	Urban100	img_019_SRF_2_HR	150	0.93098	24.1778
BERNOULLI	Urban100	img_019_SRF_2_HR	160	0.920207	23.4783
BERNOULLI	Urban100	img_019_SRF_2_HR	170	0.906616	22.6155
BERNOULLI	Urban100	img_019_SRF_2_HR	180	0.886279	21.3769
BERNOULLI	Urban100	img_019_SRF_2_HR	190	0.8669	20.8808
BERNOULLI	Urban100	img_019_SRF_2_HR	200	0.841655	19.8753
BERNOULLI	Urban100	img_019_SRF_2_HR	210	0.809631	19.0622
BERNOULLI	Urban100	img_019_SRF_2_HR	220	0.773199	18.2686
BERNOULLI	Urban100	img_019_SRF_2_HR	230	0.714778	17.2127
BERNOULLI	Urban100	img_019_SRF_2_HR	240	0.640167	16.269
BERNOULLI	Urban100	img_074_SRF_2_HR	150	0.925147	29.4085
BERNOULLI	Urban100	img_074_SRF_2_HR	160	0.914206	28.8017
BERNOULLI	Urban100	img_074_SRF_2_HR	170	0.899838	28.1076
BERNOULLI	Urban100	img_074_SRF_2_HR	180	0.878527	27.2933
BERNOULLI	Urban100	img_074_SRF_2_HR	190	0.855918	26.599
BERNOULLI	Urban100	img_074_SRF_2_HR	200	0.825281	25.8129
BERNOULLI	Urban100	img_074_SRF_2_HR	210	0.784898	25.0587
BERNOULLI	Urban100	img_074_SRF_2_HR	220	0.740181	24.2071
BERNOULLI	Urban100	img_074_SRF_2_HR	230	0.671634	23.2365
BERNOULLI	Urban100	img_074_SRF_2_HR	240	0.596233	22.0856
BERNOULLI	Urban100	img_053_SRF_2_HR	150	0.951922	27.0715
BERNOULLI	Urban100	img_053_SRF_2_HR	160	0.940648	26.1503
BERNOULLI	Urban100	img_053_SRF_2_HR	170	0.929769	25.3297
BERNOULLI	Urban100	img_053_SRF_2_HR	180	0.915947	24.5168
BERNOULLI	Urban100	img_053_SRF_2_HR	190	0.898199	23.6373
BERNOULLI	Urban100	img_053_SRF_2_HR	200	0.872121	22.6284
BERNOULLI	Urban100	img_053_SRF_2_HR	210	0.839362	21.5853
BERNOULLI	Urban100	img_053_SRF_2_HR	220	0.793374	20.4321
BERNOULLI	Urban100	img_053_SRF_2_HR	230	0.731369	19.0967
BERNOULLI	Urban100	img_053_SRF_2_HR	240	0.615267	17.2977
BERNOULLI	Urban100	img_065_SRF_2_HR	150	0.958426	31.4694
BERNOULLI	Urban100	img_065_SRF_2_HR	160	0.951224	30.7703
BERNOULLI	Urban100	img_065_SRF_2_HR	170	0.942156	30.0523
BERNOULLI	Urban100	img_065_SRF_2_HR	180	0.929151	29.1505
BERNOULLI	Urban100	img_065_SRF_2_HR	190	0.916098	28.3733
BERNOULLI	Urban100	img_065_SRF_2_HR	200	0.896335	27.4538
BERNOULLI	Urban100	img_065_SRF_2_HR	210	0.866399	26.3227
BERNOULLI	Urban100	img_065_SRF_2_HR	220	0.827481	25.1707
BERNOULLI	Urban100	img_065_SRF_2_HR	230	0.758842	23.6494
BERNOULLI	Urban100	img_065_SRF_2_HR	240	0.648721	21.8689
BERNOULLI	Urban100	img_081_SRF_2_HR	150	0.950888	33.6378
BERNOULLI	Urban100	img_081_SRF_2_HR	160	0.948104	32.9438
BERNOULLI	Urban100	img_081_SRF_2_HR	170	0.943948	32.0868
BERNOULLI	Urban100	img_081_SRF_2_HR	180	0.939182	30.8672
BERNOULLI	Urban100	img_081_SRF_2_HR	190	0.935564	30.4245
BERNOULLI	Urban100	img_081_SRF_2_HR	200	0.926396	29.5731
BERNOULLI	Urban100	img_081_SRF_2_HR	210	0.915961	28.7651
BERNOULLI	Urban100	img_081_SRF_2_HR	220	0.89874	26.4405
BERNOULLI	Urban100	img_081_SRF_2_HR	230	0.861612	24.7312
BERNOULLI	Urban100	img_081_SRF_2_HR	240	0.8008	22.1184
BERNOULLI	Urban100	img_088_SRF_2_HR	150	0.874983	23.5761
BERNOULLI	Urban100	img_088_SRF_2_HR	160	0.860351	23.0836
BERNOULLI	Urban100	img_088_SRF_2_HR	170	0.838942	22.4723
BERNOULLI	Urban100	img_088_SRF_2_HR	180	0.816716	21.9116
BERNOULLI	Urban100	img_088_SRF_2_HR	190	0.784777	21.2921
BERNOULLI	Urban100	img_088_SRF_2_HR	200	0.750262	20.6506
BERNOULLI	Urban100	img_088_SRF_2_HR	210	0.713904	20.0687
BERNOULLI	Urban100	img_088_SRF_2_HR	220	0.656498	19.3026
BERNOULLI	Urban100	img_088_SRF_2_HR	230	0.586314	18.4738
BERNOULLI	Urban100	img_088_SRF_2_HR	240	0.478713	17.2302
BERNOULLI	Urban100	img_016_SRF_2_HR	150	0.660225	5.02381
BERNOULLI	Urban100	img_016_SRF_2_HR	160	0.658461	5.03557
BERNOULLI	Urban100	img_016_SRF_2_HR	170	0.65632	5.05742
BERNOULLI	Urban100	img_016_SRF_2_HR	180	0.653692	5.07609
BERNOULLI	Urban100	img_016_SRF_2_HR	190	0.651734	5.09726
BERNOULLI	Urban100	img_016_SRF_2_HR	200	0.64657	5.13377
BERNOULLI	Urban100	img_016_SRF_2_HR	210	0.638656	5.16798
BERNOULLI	Urban100	img_016_SRF_2_HR	220	0.625748	5.20437
BERNOULLI	Urban100	img_016_SRF_2_HR	230	0.601496	5.24229
BERNOULLI	Urban100	img_016_SRF_2_HR	240	0.557117	5.27966
BERNOULLI	Urban100	img_017_SRF_2_HR	150	0.961827	29.7388
BERNOULLI	Urban100	img_017_SRF_2_HR	160	0.954081	28.9074
BERNOULLI	Urban100	img_017_SRF_2_HR	170	0.945021	28.1409
BERNOULLI	Urban100	img_017_SRF_2_HR	180	0.933889	27.278
BERNOULLI	Urban100	img_017_SRF_2_HR	190	0.920428	26.45
BERNOULLI	Urban100	img_017_SRF_2_HR	200	0.90329	25.5694
BERNOULLI	Urban100	img_017_SRF_2_HR	210	0.882128	24.6767
BERNOULLI	Urban100	img_017_SRF_2_HR	220	0.846058	23.5971
BERNOULLI	Urban100	img_017_SRF_2_HR	230	0.790491	22.1669
BERNOULLI	Urban100	img_017_SRF_2_HR	240	0.711167	20.6285
BERNOULLI	Urban100	img_059_SRF_2_HR	150	0.951244	30.24
BERNOULLI	Urban100	img_059_SRF_2_HR	160	0.942724	29.4457
BERNOULLI	Urban100	img_059_SRF_2_HR	170	0.9348	28.7116
BERNOULLI	Urban100	img_059_SRF_2_HR	180	0.922588	27.9599
BERNOULLI	Urban100	img_059_SRF_2_HR	190	0.910767	27.2326
BERNOULLI	Urban100	img_059_SRF_2_HR	200	0.891693	26.4008
BERNOULLI	Urban100	img_059_SRF_2_HR	210	0.865321	25.3652
BERNOULLI	Urban100	img_059_SRF_2_HR	220	0.831481	24.2909
BERNOULLI	Urban100	img_059_SRF_2_HR	230	0.778104	23.0932
BERNOULLI	Urban100	img_059_SRF_2_HR	240	0.71715	22.0004
BERNOULLI	Urban100	img_066_SRF_2_HR	150	0.934252	28.5298
BERNOULLI	Urban100	img_066_SRF_2_HR	160	0.926207	28.0657
BERNOULLI	Urban100	img_066_SRF_2_HR	170	0.915663	27.443
BERNOULLI	Urban100	img_066_SRF_2_HR	180	0.90075	26.726
BERNOULLI	Urban100	img_066_SRF_2_HR	190	0.884208	26.0208
BERNOULLI	Urban100	img_066_SRF_2_HR	200	0.863547	25.292
BERNOULLI	Urban100	img_066_SRF_2_HR	210	0.833725	24.3151
BERNOULLI	Urban100	img_066_SRF_2_HR	220	0.797664	23.4175
BERNOULLI	Urban100	img_066_SRF_2_HR	230	0.74308	22.3679
BERNOULLI	Urban100	img_066_SRF_2_HR	240	0.649567	20.8636
BERNOULLI	Urban100	img_078_SRF_2_HR	150	0.917715	30.2669
BERNOULLI	Urban100	img_078_SRF_2_HR	160	0.906498	29.6082
BERNOULLI	Urban100	img_078_SRF_2_HR	170	0.894906	29.0459
BERNOULLI	Urban100	img_078_SRF_2_HR	180	0.876786	28.2175
BERNOULLI	Urban100	img_078_SRF_2_HR	190	0.860102	27.7047
BERNOULLI	Urban100	img_078_SRF_2_HR	200	0.831886	26.8199
BERNOULLI	Urban100	img_078_SRF_2_HR	210	0.805639	26.0815
BERNOULLI	Urban100	img_078_SRF_2_HR	220	0.760532	25.1945
BERNOULLI	Urban100	img_078_SRF_2_HR	230	0.703441	24.1418
BERNOULLI	Urban100	img_078_SRF_2_HR	240	0.637694	23.2993
BERNOULLI	Urban100	img_073_SRF_2_HR	150	0.881308	24.7747
BERNOULLI	Urban100	img_073_SRF_2_HR	160	0.86532	24.2952
BERNOULLI	Urban100	img_073_SRF_2_HR	170	0.844729	23.6594
BERNOULLI	Urban100	img_073_SRF_2_HR	180	0.81981	23.0306
BERNOULLI	Urban100	img_073_SRF_2_HR	190	0.787115	22.3007
BERNOULLI	Urban100	img_073_SRF_2_HR	200	0.751573	21.6495
BERNOULLI	Urban100	img_073_SRF_2_HR	210	0.708589	21.0223
BERNOULLI	Urban100	img_073_SRF_2_HR	220	0.647698	20.1783
BERNOULLI	Urban100	img_073_SRF_2_HR	230	0.563388	19.24
BERNOULLI	Urban100	img_073_SRF_2_HR	240	0.422249	17.905
BERNOULLI	Urban100	img_067_SRF_2_HR	150	0.954731	24.1126
BERNOULLI	Urban100	img_067_SRF_2_HR	160	0.947439	23.5027
BERNOULLI	Urban100	img_067_SRF_2_HR	170	0.939924	22.7513
BERNOULLI	Urban100	img_067_SRF_2_HR	180	0.925982	21.8563
BERNOULLI	Urban100	img_067_SRF_2_HR	190	0.914423	21.1673
BERNOULLI	Urban100	img_067_SRF_2_HR	200	0.893593	19.946
BERNOULLI	Urban100	img_067_SRF_2_HR	210	0.868763	19.0378
BERNOULLI	Urban100	img_067_SRF_2_HR	220	0.828351	17.8871
BERNOULLI	Urban100	img_067_SRF_2_HR	230	0.763766	16.2119
BERNOULLI	Urban100	img_067_SRF_2_HR	240	0.631927	13.9442
BERNOULLI	Urban100	img_033_SRF_2_HR	150	0.943287	32.331
BERNOULLI	Urban100	img_033_SRF_2_HR	160	0.935311	31.6733
BERNOULLI	Urban100	img_033_SRF_2_HR	170	0.926284	31.1759
BERNOULLI	Urban100	img_033_SRF_2_HR	180	0.910572	30.0895
BERNOULLI	Urban100	img_033_SRF_2_HR	190	0.902384	29.4712
BERNOULLI	Urban100	img_033_SRF_2_HR	200	0.876709	28.3474
BERNOULLI	Urban100	img_033_SRF_2_HR	210	0.849228	27.3701
BERNOULLI	Urban100	img_033_SRF_2_HR	220	0.815849	26.2586
BERNOULLI	Urban100	img_033_SRF_2_HR	230	0.759722	24.7786
BERNOULLI	Urban100	img_033_SRF_2_HR	240	0.677664	22.9246
BERNOULLI	Urban100	img_087_SRF_2_HR	150	0.978016	31.7963
BERNOULLI	Urban100	img_087_SRF_2_HR	160	0.973876	31.0485
BERNOULLI	Urban100	img_087_SRF_2_HR	170	0.969003	30.3138
BERNOULLI	Urban100	img_087_SRF_2_HR	180	0.961834	29.4773
BERNOULLI	Urban100	img_087_SRF_2_HR	190	0.953682	28.5193
BERNOULLI	Urban100	img_087_SRF_2_HR	200	0.941344	27.3572
BERNOULLI	Urban100	img_087_SRF_2_HR	210	0.927778	26.3734
BERNOULLI	Urban100	img_087_SRF_2_HR	220	0.898825	24.9757
BERNOULLI	Urban100	img_087_SRF_2_HR	230	0.850784	23.1198
BERNOULLI	Urban100	img_087_SRF_2_HR	240	0.764105	20.6996
BERNOULLI	Urban100	img_100_SRF_2_HR	150	0.947185	31.3946
BERNOULLI	Urban100	img_100_SRF_2_HR	160	0.940883	30.9173
BERNOULLI	Urban100	img_100_SRF_2_HR	170	0.93187	30.059
BERNOULLI	Urban100	img_100_SRF_2_HR	180	0.92249	29.227
BERNOULLI	Urban100	img_100_SRF_2_HR	190	0.911651	28.2887
BERNOULLI	Urban100	img_100_SRF_2_HR	200	0.896379	27.2871
BERNOULLI	Urban100	img_100_SRF_2_HR	210	0.875333	26.0212
BERNOULLI	Urban100	img_100_SRF_2_HR	220	0.848804	24.5357
BERNOULLI	Urban100	img_100_SRF_2_HR	230	0.804442	22.934
BERNOULLI	Urban100	img_100_SRF_2_HR	240	0.717025	20.2324
BERNOULLI	Urban100	img_049_SRF_2_HR	150	0.941852	23.9466
BERNOULLI	Urban100	img_049_SRF_2_HR	160	0.933603	23.9065
BERNOULLI	Urban100	img_049_SRF_2_HR	170	0.919172	23.4187
BERNOULLI	Urban100	img_049_SRF_2_HR	180	0.903797	22.7885
BERNOULLI	Urban100	img_049_SRF_2_HR	190	0.88642	22.2734
BERNOULLI	Urban100	img_049_SRF_2_HR	200	0.864539	21.772
BERNOULLI	Urban100	img_049_SRF_2_HR	210	0.82816	20.7602
BERNOULLI	Urban100	img_049_SRF_2_HR	220	0.781042	19.623
BERNOULLI	Urban100	img_049_SRF_2_HR	230	0.71044	18.4012
BERNOULLI	Urban100	img_049_SRF_2_HR	240	0.586555	16.6618
BERNOULLI	Urban100	img_085_SRF_2_HR	150	0.973014	31.2038
BERNOULLI	Urban100	img_085_SRF_2_HR	160	0.969365	30.5948
BERNOULLI	Urban100	img_085_SRF_2_HR	170	0.963172	29.7975
BERNOULLI	Urban100	img_085_SRF_2_HR	180	0.956136	28.9981
BERNOULLI	Urban100	img_085_SRF_2_HR	190	0.949389	28.3359
BERNOULLI	Urban100	img_085_SRF_2_HR	200	0.936987	27.3676
BERNOULLI	Urban100	img_085_SRF_2_HR	210	0.921968	26.434
BERNOULLI	Urban100	img_085_SRF_2_HR	220	0.905667	25.4626
BERNOULLI	Urban100	img_085_SRF_2_HR	230	0.872546	24.1706
BERNOULLI	Urban100	img_085_SRF_2_HR	240	0.821384	22.4071
BERNOULLI	Urban100	img_070_SRF_2_HR	150	0.898251	28.5363
BERNOULLI	Urban100	img_070_SRF_2_HR	160	0.885083	28.0224
BERNOULLI	Urban100	img_070_SRF_2_HR	170	0.87085	27.5334
BERNOULLI	Urban100	img_070_SRF_2_HR	180	0.855171	27.0386
BERNOULLI	Urban100	img_070_SRF_2_HR	190	0.835691	26.3973
BERNOULLI	Urban100	img_070_SRF_2_HR	200	0.809035	25.7713
BERNOULLI	Urban100	img_070_SRF_2_HR	210	0.781893	25.0603
BERNOULLI	Urban100	img_070_SRF_2_HR	220	0.742232	24.1231
BERNOULLI	Urban100	img_070_SRF_2_HR	230	0.692498	23.2554
BERNOULLI	Urban100	img_070_SRF_2_HR	240	0.617645	22.0477
BERNOULLI	Urban100	img_038_SRF_2_HR	150	0.911448	32.0397
BERNOULLI	Urban100	img_038_SRF_2_HR	160	0.898512	31.4165
BERNOULLI	Urban100	img_038_SRF_2_HR	170	0.882231	30.8668
BERNOULLI	Urban100	img_038_SRF_2_HR	180	0.864364	30.1008
BERNOULLI	Urban100	img_038_SRF_2_HR	190	0.840492	29.3641
BERNOULLI	Urban100	img_038_SRF_2_HR	200	0.805496	28.5025
BERNOULLI	Urban100	img_038_SRF_2_HR	210	0.763939	27.5924
BERNOULLI	Urban100	img_038_SRF_2_HR	220	0.711348	26.6322
BERNOULLI	Urban100	img_038_SRF_2_HR	230	0.637129	25.543
BERNOULLI	Urban100	img_038_SRF_2_HR	240	0.520856	24.1974
BERNOULLI	Urban100	img_052_SRF_2_HR	150	0.976753	33.6289
BERNOULLI	Urban100	img_052_SRF_2_HR	160	0.971777	32.6597
BERNOULLI	Urban100	img_052_SRF_2_HR	170	0.964971	31.7742
BERNOULLI	Urban100	img_052_SRF_2_HR	180	0.959482	30.9365
BERNOULLI	Urban100	img_052_SRF_2_HR	190	0.948895	29.5888
BERNOULLI	Urban100	img_052_SRF_2_HR	200	0.932459	28.4226
BERNOULLI	Urban100	img_052_SRF_2_HR	210	0.914455	27.187
BERNOULLI	Urban100	img_052_SRF_2_HR	220	0.884823	25.6863
BERNOULLI	Urban100	img_052_SRF_2_HR	230	0.827959	23.4515
BERNOULLI	Urban100	img_052_SRF_2_HR	240	0.742991	21.239
BERNOULLI	Urban100	img_060_SRF_2_HR	150	0.916358	28.3347
BERNOULLI	Urban100	img_060_SRF_2_HR	160	0.906326	27.7638
BERNOULLI	Urban100	img_060_SRF_2_HR	170	0.892072	27.2057
BERNOULLI	Urban100	img_060_SRF_2_HR	180	0.875183	26.5481
BERNOULLI	Urban100	img_060_SRF_2_HR	190	0.853104	25.7234
BERNOULLI	Urban100	img_060_SRF_2_HR	200	0.823568	24.9599
BERNOULLI	Urban100	img_060_SRF_2_HR	210	0.790128	24.1479
BERNOULLI	Urban100	img_060_SRF_2_HR	220	0.739996	23.241
BERNOULLI	Urban100	img_060_SRF_2_HR	230	0.668704	21.8816
BERNOULLI	Urban100	img_060_SRF_2_HR	240	0.567613	20.6813
BERNOULLI	Urban100	img_029_SRF_2_HR	150	0.949912	29.8388
BERNOULLI	Urban100	img_029_SRF_2_HR	160	0.93792	28.8386
BERNOULLI	Urban100	img_029_SRF_2_HR	170	0.929128	28.1727
BERNOULLI	Urban100	img_029_SRF_2_HR	180	0.918334	27.479
BERNOULLI	Urban100	img_029_SRF_2_HR	190	0.898362	26.5956
BERNOULLI	Urban100	img_029_SRF_2_HR	200	0.878717	25.6688
BERNOULLI	Urban100	img_029_SRF_2_HR	210	0.849367	24.7615
BERNOULLI	Urban100	img_029_SRF_2_HR	220	0.809206	23.6301
BERNOULLI	Urban100	img_029_SRF_2_HR	230	0.74293	22.3431
BERNOULLI	Urban100	img_029_SRF_2_HR	240	0.632419	20.2779
BERNOULLI	Urban100	img_076_SRF_2_HR	150	0.917889	26.3331
BERNOULLI	Urban100	img_076_SRF_2_HR	160	0.901876	25.6404
BERNOULLI	Urban100	img_076_SRF_2_HR	170	0.885872	24.9626
BERNOULLI	Urban100	img_076_SRF_2_HR	180	0.869597	24.455
BERNOULLI	Urban100	img_076_SRF_2_HR	190	0.846662	23.7337
BERNOULLI	Urban100	img_076_SRF_2_HR	200	0.820589	23.1255
BERNOULLI	Urban100	img_076_SRF_2_HR	210	0.787832	22.4911
BERNOULLI	Urban100	img_076_SRF_2_HR	220	0.730047	21.4713
BERNOULLI	Urban100	img_076_SRF_2_HR	230	0.672221	20.5259
BERNOULLI	Urban100	img_076_SRF_2_HR	240	0.589663	19.2715
BERNOULLI	Urban100	img_050_SRF_2_HR	150	0.925655	27.3349
BERNOULLI	Urban100	img_050_SRF_2_HR	160	0.917726	26.9728
BERNOULLI	Urban100	img_050_SRF_2_HR	170	0.903199	26.2397
BERNOULLI	Urban100	img_050_SRF_2_HR	180	0.885825	25.4345
BERNOULLI	Urban100	img_050_SRF_2_HR	190	0.868625	24.9378
BERNOULLI	Urban100	img_050_SRF_2_HR	200	0.844686	24.2114
BERNOULLI	Urban100	img_050_SRF_2_HR	210	0.814988	23.5332
BERNOULLI	Urban100	img_050_SRF_2_HR	220	0.77515	22.6887
BERNOULLI	Urban100	img_050_SRF_2_HR	230	0.719255	21.6659
BERNOULLI	Urban100	img_050_SRF_2_HR	240	0.636678	20.6342
BERNOULLI	Urban100	img_095_SRF_2_HR	150	0.853019	25.872
BERNOULLI	Urban100	img_095_SRF_2_HR	160	0.834272	25.3017
BERNOULLI	Urban100	img_095_SRF_2_HR	170	0.811676	24.7596
BERNOULLI	Urban100	img_095_SRF_2_HR	180	0.782001	24.1626
BERNOULLI	Urban100	img_095_SRF_2_HR	190	0.751629	23.5774
BERNOULLI	Urban100	img_095_SRF_2_HR	200	0.709834	22.8375
BERNOULLI	Urban100	img_095_SRF_2_HR	210	0.661198	22.1922
BERNOULLI	Urban100	img_095_SRF_2_HR	220	0.594844	21.3881
BERNOULLI	Urban100	img_095_SRF_2_HR	230	0.514767	20.4681
BERNOULLI	Urban100	img_095_SRF_2_HR	240	0.404808	19.3522
BERNOULLI	Urban100	img_020_SRF_2_HR	150	0.912406	24.986
BERNOULLI	Urban100	img_020_SRF_2_HR	160	0.898789	24.3709
BERNOULLI	Urban100	img_020_SRF_2_HR	170	0.881631	23.7147
BERNOULLI	Urban100	img_020_SRF_2_HR	180	0.861636	22.9808
BERNOULLI	Urban100	img_020_SRF_2_HR	190	0.843037	22.4958
BERNOULLI	Urban100	img_020_SRF_2_HR	200	0.809759	21.6729
BERNOULLI	Urban100	img_020_SRF_2_HR	210	0.774656	20.9846
BERNOULLI	Urban100	img_020_SRF_2_HR	220	0.729617	20.0639
BERNOULLI	Urban100	img_020_SRF_2_HR	230	0.66056	19.0773
BERNOULLI	Urban100	img_020_SRF_2_HR	240	0.575096	18.0297
BERNOULLI	Urban100	img_045_SRF_2_HR	150	0.97683	30.7669
BERNOULLI	Urban100	img_045_SRF_2_HR	160	0.972348	30.1089
BERNOULLI	Urban100	img_045_SRF_2_HR	170	0.964461	28.9963
BERNOULLI	Urban100	img_045_SRF_2_HR	180	0.956222	28.161
BERNOULLI	Urban100	img_045_SRF_2_HR	190	0.944701	27.0577
BERNOULLI	Urban100	img_045_SRF_2_HR	200	0.928247	26.0297
BERNOULLI	Urban100	img_045_SRF_2_HR	210	0.901067	24.5971
BERNOULLI	Urban100	img_045_SRF_2_HR	220	0.860984	23.3453
BERNOULLI	Urban100	img_045_SRF_2_HR	230	0.797346	21.6709
BERNOULLI	Urban100	img_045_SRF_2_HR	240	0.623082	18.9087
BERNOULLI	Urban100	img_006_SRF_2_HR	150	0.914022	27.5618
BERNOULLI	Urban100	img_006_SRF_2_HR	160	0.899992	26.8353
BERNOULLI	Urban100	img_006_SRF_2_HR	170	0.885137	26.0322
BERNOULLI	Urban100	img_006_SRF_2_HR	180	0.865631	25.2043
BERNOULLI	Urban100	img_006_SRF_2_HR	190	0.840342	24.3528
BERNOULLI	Urban100	img_006_SRF_2_HR	200	0.809234	23.3678
BERNOULLI	Urban100	img_006_SRF_2_HR	210	0.774647	22.5021
BERNOULLI	Urban100	img_006_SRF_2_HR	220	0.71515	21.2602
BERNOULLI	Urban100	img_006_SRF_2_HR	230	0.640701	20.1581
BERNOULLI	Urban100	img_006_SRF_2_HR	240	0.524044	18.7537
BERNOULLI	Urban100	img_043_SRF_2_HR	150	0.97787	32.3521
BERNOULLI	Urban100	img_043_SRF_2_HR	160	0.97499	31.5904
BERNOULLI	Urban100	img_043_SRF_2_HR	170	0.96977	30.3796
BERNOULLI	Urban100	img_043_SRF_2_HR	180	0.963779	29.2675
BERNOULLI	Urban100	img_043_SRF_2_HR	190	0.957049	28.3232
BERNOULLI	Urban100	img_043_SRF_2_HR	200	0.946055	26.9971
BERNOULLI	Urban100	img_043_SRF_2_HR	210	0.932493	25.7477
BERNOULLI	Urban100	img_043_SRF_2_HR	220	0.911369	23.8657
BERNOULLI	Urban100	img_043_SRF_2_HR	230	0.873947	21.5101
BERNOULLI	Urban100	img_043_SRF_2_HR	240	0.786199	17.9746
BERNOULLI	Urban100	img_063_SRF_2_HR	150	0.927122	25.9854
BERNOULLI	Urban100	img_063_SRF_2_HR	160	0.917607	25.2377
BERNOULLI	Urban100	img_063_SRF_2_HR	170	0.906504	24.6076
BERNOULLI	Urban100	img_063_SRF_2_HR	180	0.894385	23.8992
BERNOULLI	Urban100	img_063_SRF_2_HR	190	0.875446	22.9972
BERNOULLI	Urban100	img_063_SRF_2_HR	200	0.855471	22.1287
BERNOULLI	Urban100	img_063_SRF_2_HR	210	0.825544	20.9856
BERNOULLI	Urban100	img_063_SRF_2_HR	220	0.784492	19.8182
BERNOULLI	Urban100	img_063_SRF_2_HR	230	0.719609	18.2185
BERNOULLI	Urban100	img_063_SRF_2_HR	240	0.60483	16.1961
BERNOULLI	Urban100	img_007_SRF_2_HR	150	0.967059	31.9483
BERNOULLI	Urban100	img_007_SRF_2_HR	160	0.960555	31.0323
BERNOULLI	Urban100	img_007_SRF_2_HR	170	0.952673	30.1826
BERNOULLI	Urban100	img_007_SRF_2_HR	180	0.942633	29.2648
BERNOULLI	Urban100	img_007_SRF_2_HR	190	0.931626	28.4928
BERNOULLI	Urban100	img_007_SRF_2_HR	200	0.913443	27.2871
BERNOULLI	Urban100	img_007_SRF_2_HR	210	0.890669	26.208
BERNOULLI	Urban100	img_007_SRF_2_HR	220	0.859679	24.8376
BERNOULLI	Urban100	img_007_SRF_2_HR	230	0.802462	22.9748
BERNOULLI	Urban100	img_007_SRF_2_HR	240	0.702619	20.7501
BERNOULLI	Urban100	img_077_SRF_2_HR	150	0.903093	27.6095
BERNOULLI	Urban100	img_077_SRF_2_HR	160	0.889843	27.0673
BERNOULLI	Urban100	img_077_SRF_2_HR	170	0.875555	26.5338
BERNOULLI	Urban100	img_077_SRF_2_HR	180	0.858802	25.9481
BERNOULLI	Urban100	img_077_SRF_2_HR	190	0.838343	25.4142
BERNOULLI	Urban100	img_077_SRF_2_HR	200	0.81562	24.8287
BERNOULLI	Urban100	img_077_SRF_2_HR	210	0.785242	24.1409
BERNOULLI	Urban100	img_077_SRF_2_HR	220	0.75028	23.5616
BERNOULLI	Urban100	img_077_SRF_2_HR	230	0.702903	22.6815
BERNOULLI	Urban100	img_077_SRF_2_HR	240	0.625311	21.4187
BERNOULLI	Urban100	img_054_SRF_2_HR	150	0.93644	27.0073
BERNOULLI	Urban100	img_054_SRF_2_HR	160	0.926242	26.357
BERNOULLI	Urban100	img_054_SRF_2_HR	170	0.915344	25.6955
BERNOULLI	Urban100	img_054_SRF_2_HR	180	0.900441	24.9198
BERNOULLI	Urban100	img_054_SRF_2_HR	190	0.884377	24.2111
BERNOULLI	Urban100	img_054_SRF_2_HR	200	0.860654	23.3195
BERNOULLI	Urban100	img_054_SRF_2_HR	210	0.835049	22.5452
BERNOULLI	Urban100	img_054_SRF_2_HR	220	0.787307	21.4136
BERNOULLI	Urban100	img_054_SRF_2_HR	230	0.728369	20.3064
BERNOULLI	Urban100	img_054_SRF_2_HR	240	0.635355	19.078
BERNOULLI	Urban100	img_068_SRF_2_HR	150	0.969573	33.6482
BERNOULLI	Urban100	img_068_SRF_2_HR	160	0.965103	33.0605
BERNOULLI	Urban100	img_068_SRF_2_HR	170	0.956954	32.0738
BERNOULLI	Urban100	img_068_SRF_2_HR	180	0.947076	31.1394
BERNOULLI	Urban100	img_068_SRF_2_HR	190	0.935482	30.2697
BERNOULLI	Urban100	img_068_SRF_2_HR	200	0.914793	29.0513
BERNOULLI	Urban100	img_068_SRF_2_HR	210	0.887541	27.8571
BERNOULLI	Urban100	img_068_SRF_2_HR	220	0.855033	26.6172
BERNOULLI	Urban100	img_068_SRF_2_HR	230	0.796334	25.0409
BERNOULLI	Urban100	img_068_SRF_2_HR	240	0.695424	23.0712
BERNOULLI	Urban100	img_089_SRF_2_HR	150	0.924413	30.5191
BERNOULLI	Urban100	img_089_SRF_2_HR	160	0.912961	29.9248
BERNOULLI	Urban100	img_089_SRF_2_HR	170	0.899458	29.3643
BERNOULLI	Urban100	img_089_SRF_2_HR	180	0.88493	28.7604
BERNOULLI	Urban100	img_089_SRF_2_HR	190	0.865164	27.9766
BERNOULLI	Urban100	img_089_SRF_2_HR	200	0.845065	27.3339
BERNOULLI	Urban100	img_089_SRF_2_HR	210	0.81385	26.5686
BERNOULLI	Urban100	img_089_SRF_2_HR	220	0.774689	25.6008
BERNOULLI	Urban100	img_089_SRF_2_HR	230	0.714653	24.5433
BERNOULLI	Urban100	img_089_SRF_2_HR	240	0.609802	22.892
BERNOULLI	Urban100	img_010_SRF_2_HR	150	0.967411	32.8661
BERNOULLI	Urban100	img_010_SRF_2_HR	160	0.963247	32.3356
BERNOULLI	Urban100	img_010_SRF_2_HR	170	0.956529	31.4185
BERNOULLI	Urban100	img_010_SRF_2_HR	180	0.949286	30.8034
BERNOULLI	Urban100	img_010_SRF_2_HR	190	0.938093	29.7017
BERNOULLI	Urban100	img_010_SRF_2_HR	200	0.925912	28.724
BERNOULLI	Urban100	img_010_SRF_2_HR	210	0.906515	27.3998
BERNOULLI	Urban100	img_010_SRF_2_HR	220	0.881575	26.3945
BERNOULLI	Urban100	img_010_SRF_2_HR	230	0.836979	24.6225
BERNOULLI	Urban100	img_010_SRF_2_HR	240	0.77244	22.8639
BERNOULLI	Urban100	img_097_SRF_2_HR	150	0.955019	29.8141
BERNOULLI	Urban100	img_097_SRF_2_HR	160	0.948077	29.1791
BERNOULLI	Urban100	img_097_SRF_2_HR	170	0.937177	28.3016
BERNOULLI	Urban100	img_097_SRF_2_HR	180	0.927279	27.6937
BERNOULLI	Urban100	img_097_SRF_2_HR	190	0.911758	26.7845
BERNOULLI	Urban100	img_097_SRF_2_HR	200	0.893821	25.8884
BERNOULLI	Urban100	img_097_SRF_2_HR	210	0.869051	25.0689
BERNOULLI	Urban100	img_097_SRF_2_HR	220	0.832292	23.8032
BERNOULLI	Urban100	img_097_SRF_2_HR	230	0.777078	22.5427
BERNOULLI	Urban100	img_097_SRF_2_HR	240	0.684127	20.9327
BERNOULLI	Urban100	img_062_SRF_2_HR	150	0.932314	26.1409
BERNOULLI	Urban100	img_062_SRF_2_HR	160	0.923634	25.6031
BERNOULLI	Urban100	img_062_SRF_2_HR	170	0.912856	24.967
BERNOULLI	Urban100	img_062_SRF_2_HR	180	0.896031	24.2883
BERNOULLI	Urban100	img_062_SRF_2_HR	190	0.874444	23.3099
BERNOULLI	Urban100	img_062_SRF_2_HR	200	0.841225	22.343
BERNOULLI	Urban100	img_062_SRF_2_HR	210	0.811012	21.596
BERNOULLI	Urban100	img_062_SRF_2_HR	220	0.754868	20.4446
BERNOULLI	Urban100	img_062_SRF_2_HR	230	0.689059	19.3158
BERNOULLI	Urban100	img_062_SRF_2_HR	240	0.578222	17.9039
BERNOULLI	Urban100	img_069_SRF_2_HR	150	0.939677	29.0892
BERNOULLI	Urban100	img_069_SRF_2_HR	160	0.92853	28.4229
BERNOULLI	Urban100	img_069_SRF_2_HR	170	0.917733	27.7567
BERNOULLI	Urban100	img_069_SRF_2_HR	180	0.905013	27.1101
BERNOULLI	Urban100	img_069_SRF_2_HR	190	0.887254	26.4171
BERNOULLI	Urban100	img_069_SRF_2_HR	200	0.866475	25.6826
BERNOULLI	Urban100	img_069_SRF_2_HR	210	0.840541	24.9089
BERNOULLI	Urban100	img_069_SRF_2_HR	220	0.798193	23.8793
BERNOULLI	Urban100	img_069_SRF_2_HR	230	0.740427	22.8015
BERNOULLI	Urban100	img_069_SRF_2_HR	240	0.636597	21.2192
BERNOULLI	Urban100	img_047_SRF_2_HR	150	0.933539	26.3076
BERNOULLI	Urban100	img_047_SRF_2_HR	160	0.922517	25.6242
BERNOULLI	Urban100	img_047_SRF_2_HR	170	0.907971	24.9625
BERNOULLI	Urban100	img_047_SRF_2_HR	180	0.893631	24.2806
BERNOULLI	Urban100	img_047_SRF_2_HR	190	0.874239	23.531
BERNOULLI	Urban100	img_047_SRF_2_HR	200	0.845897	22.6753
BERNOULLI	Urban100	img_047_SRF_2_HR	210	0.814187	21.7366
BERNOULLI	Urban100	img_047_SRF_2_HR	220	0.766451	20.8501
BERNOULLI	Urban100	img_047_SRF_2_HR	230	0.706327	19.9149
BERNOULLI	Urban100	img_047_SRF_2_HR	240	0.607188	18.6544
BERNOULLI	Urban100	img_039_SRF_2_HR	150	0.931681	27.9511
BERNOULLI	Urban100	img_039_SRF_2_HR	160	0.920789	27.3033
BERNOULLI	Urban100	img_039_SRF_2_HR	170	0.906601	26.5495
BERNOULLI	Urban100	img_039_SRF_2_HR	180	0.889066	25.7786
BERNOULLI	Urban100	img_039_SRF_2_HR	190	0.864727	24.8488
BERNOULLI	Urban100	img_039_SRF_2_HR	200	0.838083	23.9717
BERNOULLI	Urban100	img_039_SRF_2_HR	210	0.797984	22.958
BERNOULLI	Urban100	img_039_SRF_2_HR	220	0.750863	21.8861
BERNOULLI	Urban100	img_039_SRF_2_HR	230	0.687995	20.7337
BERNOULLI	Urban100	img_039_SRF_2_HR	240	0.595742	19.246
BERNOULLI	Urban100	img_044_SRF_2_HR	150	0.98157	35.2306
BERNOULLI	Urban100	img_044_SRF_2_HR	160	0.977521	34.3574
BERNOULLI	Urban100	img_044_SRF_2_HR	170	0.971723	33.3071
BERNOULLI	Urban100	img_044_SRF_2_HR	180	0.964467	32.3735
BERNOULLI	Urban100	img_044_SRF_2_HR	190	0.953219	31.2071
BERNOULLI	Urban100	img_044_SRF_2_HR	200	0.936991	29.7737
BERNOULLI	Urban100	img_044_SRF_2_HR	210	0.909597	28.1607
BERNOULLI	Urban100	img_044_SRF_2_HR	220	0.873755	26.8411
BERNOULLI	Urban100	img_044_SRF_2_HR	230	0.786667	24.8412
BERNOULLI	Urban100	img_044_SRF_2_HR	240	0.615338	21.8597
BERNOULLI	Urban100	img_082_SRF_2_HR	150	0.98151	35.0729
BERNOULLI	Urban100	img_082_SRF_2_HR	160	0.979302	34.5232
BERNOULLI	Urban100	img_082_SRF_2_HR	170	0.976442	33.5773
BERNOULLI	Urban100	img_082_SRF_2_HR	180	0.972288	32.4423
BERNOULLI	Urban100	img_082_SRF_2_HR	190	0.9674	31.4164
BERNOULLI	Urban100	img_082_SRF_2_HR	200	0.960578	30.3852
BERNOULLI	Urban100	img_082_SRF_2_HR	210	0.95223	29.1055
BERNOULLI	Urban100	img_082_SRF_2_HR	220	0.936569	27.4271
BERNOULLI	Urban100	img_082_SRF_2_HR	230	0.910479	25.3458
BERNOULLI	Urban100	img_082_SRF_2_HR	240	0.856634	22.9924
BERNOULLI	Urban100	img_015_SRF_2_HR	150	0.949612	30.4068
BERNOULLI	Urban100	img_015_SRF_2_HR	160	0.944048	29.8467
BERNOULLI	Urban100	img_015_SRF_2_HR	170	0.934195	28.9113
BERNOULLI	Urban100	img_015_SRF_2_HR	180	0.926245	28.3571
BERNOULLI	Urban100	img_015_SRF_2_HR	190	0.912118	27.2976
BERNOULLI	Urban100	img_015_SRF_2_HR	200	0.893146	26.263
BERNOULLI	Urban100	img_015_SRF_2_HR	210	0.870908	25.1475
BERNOULLI	Urban100	img_015_SRF_2_HR	220	0.836405	23.9068
BERNOULLI	Urban100	img_015_SRF_2_HR	230	0.782966	22.4577
BERNOULLI	Urban100	img_015_SRF_2_HR	240	0.685969	20.3913
BERNOULLI	Urban100	img_072_SRF_2_HR	150	0.9593	23.7653
BERNOULLI	Urban100	img_072_SRF_2_HR	160	0.951626	23.0355
BERNOULLI	Urban100	img_072_SRF_2_HR	170	0.938209	21.8942
BERNOULLI	Urban100	img_072_SRF_2_HR	180	0.928955	21.1879
BERNOULLI	Urban100	img_072_SRF_2_HR	190	0.911964	20.3072
BERNOULLI	Urban100	img_072_SRF_2_HR	200	0.884248	19.0757
BERNOULLI	Urban100	img_072_SRF_2_HR	210	0.849723	17.9418
BERNOULLI	Urban100	img_072_SRF_2_HR	220	0.796659	16.5922
BERNOULLI	Urban100	img_072_SRF_2_HR	230	0.699653	14.7494
BERNOULLI	Urban100	img_072_SRF_2_HR	240	0.54931	12.9183
BERNOULLI	Urban100	img_071_SRF_2_HR	150	0.915959	33.1449
BERNOULLI	Urban100	img_071_SRF_2_HR	160	0.905624	32.5019
BERNOULLI	Urban100	img_071_SRF_2_HR	170	0.891807	31.8911
BERNOULLI	Urban100	img_071_SRF_2_HR	180	0.877492	31.0552
BERNOULLI	Urban100	img_071_SRF_2_HR	190	0.858673	30.6113
BERNOULLI	Urban100	img_071_SRF_2_HR	200	0.835316	29.753
BERNOULLI	Urban100	img_071_SRF_2_HR	210	0.806912	28.9387
BERNOULLI	Urban100	img_071_SRF_2_HR	220	0.765986	27.8427
BERNOULLI	Urban100	img_071_SRF_2_HR	230	0.706378	26.7501
BERNOULLI	Urban100	img_071_SRF_2_HR	240	0.61809	25.22
BERNOULLI	Urban100	img_023_SRF_2_HR	150	0.750846	7.35023
BERNOULLI	Urban100	img_023_SRF_2_HR	160	0.748324	7.40566
BERNOULLI	Urban100	img_023_SRF_2_HR	170	0.744354	7.44545
BERNOULLI	Urban100	img_023_SRF_2_HR	180	0.737718	7.50919
BERNOULLI	Urban100	img_023_SRF_2_HR	190	0.731692	7.57974
BERNOULLI	Urban100	img_023_SRF_2_HR	200	0.722369	7.63916
BERNOULLI	Urban100	img_023_SRF_2_HR	210	0.707327	7.65516
BERNOULLI	Urban100	img_023_SRF_2_HR	220	0.680259	7.6707
BERNOULLI	Urban100	img_023_SRF_2_HR	230	0.631527	7.69849
BERNOULLI	Urban100	img_023_SRF_2_HR	240	0.515047	7.67393
BERNOULLI	Urban100	img_051_SRF_2_HR	150	0.952915	29.7947
BERNOULLI	Urban100	img_051_SRF_2_HR	160	0.947124	29.2953
BERNOULLI	Urban100	img_051_SRF_2_HR	170	0.93551	28.4215
BERNOULLI	Urban100	img_051_SRF_2_HR	180	0.926571	27.7878
BERNOULLI	Urban100	img_051_SRF_2_HR	190	0.913595	27.1645
BERNOULLI	Urban100	img_051_SRF_2_HR	200	0.894516	26.2
BERNOULLI	Urban100	img_051_SRF_2_HR	210	0.872922	25.4356
BERNOULLI	Urban100	img_051_SRF_2_HR	220	0.837569	24.4993
BERNOULLI	Urban100	img_051_SRF_2_HR	230	0.783779	23.0994
BERNOULLI	Urban100	img_051_SRF_2_HR	240	0.695032	21.7436
BERNOULLI	Urban100	img_001_SRF_2_HR	150	0.943204	32.0605
BERNOULLI	Urban100	img_001_SRF_2_HR	160	0.935929	31.6837
BERNOULLI	Urban100	img_001_SRF_2_HR	170	0.923111	30.4703
BERNOULLI	Urban100	img_001_SRF_2_HR	180	0.911096	29.804
BERNOULLI	Urban100	img_001_SRF_2_HR	190	0.898254	28.9962
BERNOULLI	Urban100	img_001_SRF_2_HR	200	0.879738	28.031
BERNOULLI	Urban100	img_001_SRF_2_HR	210	0.85468	26.9146
BERNOULLI	Urban100	img_001_SRF_2_HR	220	0.82379	25.7451
BERNOULLI	Urban100	img_001_SRF_2_HR	230	0.768687	24.3313
BERNOULLI	Urban100	img_001_SRF_2_HR	240	0.683391	22.3476
BERNOULLI	Urban100	img_004_SRF_2_HR	150	0.93598	25.1455
BERNOULLI	Urban100	img_004_SRF_2_HR	160	0.926602	24.4416
BERNOULLI	Urban100	img_004_SRF_2_HR	170	0.910392	23.4985
BERNOULLI	Urban100	img_004_SRF_2_HR	180	0.89389	22.659
BERNOULLI	Urban100	img_004_SRF_2_HR	190	0.865588	21.56
BERNOULLI	Urban100	img_004_SRF_2_HR	200	0.831536	20.5713
BERNOULLI	Urban100	img_004_SRF_2_HR	210	0.78835	19.5122
BERNOULLI	Urban100	img_004_SRF_2_HR	220	0.72726	18.4511
BERNOULLI	Urban100	img_004_SRF_2_HR	230	0.659845	17.7532
BERNOULLI	Urban100	img_004_SRF_2_HR	240	0.530231	16.3569
BERNOULLI	Urban100	img_086_SRF_2_HR	150	0.968469	33.6823
BERNOULLI	Urban100	img_086_SRF_2_HR	160	0.963052	32.945
BERNOULLI	Urban100	img_086_SRF_2_HR	170	0.957417	32.0895
BERNOULLI	Urban100	img_086_SRF_2_HR	180	0.949402	31.3664
BERNOULLI	Urban100	img_086_SRF_2_HR	190	0.940236	30.4125
BERNOULLI	Urban100	img_086_SRF_2_HR	200	0.92951	29.5181
BERNOULLI	Urban100	img_086_SRF_2_HR	210	0.912555	28.4318
BERNOULLI	Urban100	img_086_SRF_2_HR	220	0.894483	27.4364
BERNOULLI	Urban100	img_086_SRF_2_HR	230	0.866587	26.2425
BERNOULLI	Urban100	img_086_SRF_2_HR	240	0.815722	24.2344
BERNOULLI	Urban100	img_090_SRF_2_HR	150	0.988372	37.9859
BERNOULLI	Urban100	img_090_SRF_2_HR	160	0.987265	37.8071
BERNOULLI	Urban100	img_090_SRF_2_HR	170	0.984217	36.7362
BERNOULLI	Urban100	img_090_SRF_2_HR	180	0.9808	35.7885
BERNOULLI	Urban100	img_090_SRF_2_HR	190	0.975877	34.5937
BERNOULLI	Urban100	img_090_SRF_2_HR	200	0.96988	33.6736
BERNOULLI	Urban100	img_090_SRF_2_HR	210	0.958659	32.3618
BERNOULLI	Urban100	img_090_SRF_2_HR	220	0.942835	30.9318
BERNOULLI	Urban100	img_090_SRF_2_HR	230	0.910791	29.1052
BERNOULLI	Urban100	img_090_SRF_2_HR	240	0.837929	26.6948
BERNOULLI	Urban100	img_005_SRF_2_HR	150	0.977762	29.644
BERNOULLI	Urban100	img_005_SRF_2_HR	160	0.973418	28.6514
BERNOULLI	Urban100	img_005_SRF_2_HR	170	0.968231	27.7425
BERNOULLI	Urban100	img_005_SRF_2_HR	180	0.962737	26.9754
BERNOULLI	Urban100	img_005_SRF_2_HR	190	0.953172	25.9835
BERNOULLI	Urban100	img_005_SRF_2_HR	200	0.943162	25.0691
BERNOULLI	Urban100	img_005_SRF_2_HR	210	0.925615	23.776
BERNOULLI	Urban100	img_005_SRF_2_HR	220	0.899511	22.3399
BERNOULLI	Urban100	img_005_SRF_2_HR	230	0.862712	20.9133
BERNOULLI	Urban100	img_005_SRF_2_HR	240	0.776624	18.5333
BERNOULLI	Urban100	img_040_SRF_2_HR	150	0.991612	32.025
BERNOULLI	Urban100	img_040_SRF_2_HR	160	0.990406	31.1556
BERNOULLI	Urban100	img_040_SRF_2_HR	170	0.988544	30.3261
BERNOULLI	Urban100	img_040_SRF_2_HR	180	0.986405	29.4807
BERNOULLI	Urban100	img_040_SRF_2_HR	190	0.981679	28.1168
BERNOULLI	Urban100	img_040_SRF_2_HR	200	0.975196	26.582
BERNOULLI	Urban100	img_040_SRF_2_HR	210	0.967494	25.3826
BERNOULLI	Urban100	img_040_SRF_2_HR	220	0.948207	23.2311
BERNOULLI	Urban100	img_040_SRF_2_HR	230	0.911286	20.7795
BERNOULLI	Urban100	img_040_SRF_2_HR	240	0.807653	17.2538
BERNOULLI	Urban100	img_002_SRF_2_HR	150	0.964712	30.7888
BERNOULLI	Urban100	img_002_SRF_2_HR	160	0.95779	30.0707
BERNOULLI	Urban100	img_002_SRF_2_HR	170	0.950049	29.1112
BERNOULLI	Urban100	img_002_SRF_2_HR	180	0.939526	28.4266
BERNOULLI	Urban100	img_002_SRF_2_HR	190	0.925713	27.4924
BERNOULLI	Urban100	img_002_SRF_2_HR	200	0.909591	26.7548
BERNOULLI	Urban100	img_002_SRF_2_HR	210	0.884925	25.5884
BERNOULLI	Urban100	img_002_SRF_2_HR	220	0.851974	24.5262
BERNOULLI	Urban100	img_002_SRF_2_HR	230	0.79543	23.0238
BERNOULLI	Urban100	img_002_SRF_2_HR	240	0.707017	21.2908
BERNOULLI	Urban100	img_083_SRF_2_HR	150	0.937863	27.5382
BERNOULLI	Urban100	img_083_SRF_2_HR	160	0.927342	26.8802
BERNOULLI	Urban100	img_083_SRF_2_HR	170	0.915514	26.1711
BERNOULLI	Urban100	img_083_SRF_2_HR	180	0.898412	25.3402
BERNOULLI	Urban100	img_083_SRF_2_HR	190	0.882219	24.5994
BERNOULLI	Urban100	img_083_SRF_2_HR	200	0.857549	23.8423
BERNOULLI	Urban100	img_083_SRF_2_HR	210	0.826353	22.9079
BERNOULLI	Urban100	img_083_SRF_2_HR	220	0.777745	21.8562
BERNOULLI	Urban100	img_083_SRF_2_HR	230	0.705379	20.4935
BERNOULLI	Urban100	img_083_SRF_2_HR	240	0.588019	18.8757
BERNOULLI	Urban100	img_008_SRF_2_HR	150	0.914191	25.7163
BERNOULLI	Urban100	img_008_SRF_2_HR	160	0.901383	25.1
BERNOULLI	Urban100	img_008_SRF_2_HR	170	0.883987	24.4585
BERNOULLI	Urban100	img_008_SRF_2_HR	180	0.859186	23.5763
BERNOULLI	Urban100	img_008_SRF_2_HR	190	0.834742	22.9176
BERNOULLI	Urban100	img_008_SRF_2_HR	200	0.79854	22.0037
BERNOULLI	Urban100	img_008_SRF_2_HR	210	0.761842	21.3382
BERNOULLI	Urban100	img_008_SRF_2_HR	220	0.696032	20.3272
BERNOULLI	Urban100	img_008_SRF_2_HR	230	0.61049	19.1529
BERNOULLI	Urban100	img_008_SRF_2_HR	240	0.487375	17.9086
BERNOULLI	Urban100	img_032_SRF_2_HR	150	0.958029	33.5629
BERNOULLI	Urban100	img_032_SRF_2_HR	160	0.950995	32.8221
BERNOULLI	Urban100	img_032_SRF_2_HR	170	0.942668	32.2807
BERNOULLI	Urban100	img_032_SRF_2_HR	180	0.932921	31.5817
BERNOULLI	Urban100	img_032_SRF_2_HR	190	0.918662	30.5281
BERNOULLI	Urban100	img_032_SRF_2_HR	200	0.901556	29.5073
BERNOULLI	Urban100	img_032_SRF_2_HR	210	0.878451	28.5479
BERNOULLI	Urban100	img_032_SRF_2_HR	220	0.844729	27.4073
BERNOULLI	Urban100	img_032_SRF_2_HR	230	0.785528	25.626
BERNOULLI	Urban100	img_032_SRF_2_HR	240	0.730585	24.5677
BERNOULLI	Urban100	img_028_SRF_2_HR	150	0.974866	34.8714
BERNOULLI	Urban100	img_028_SRF_2_HR	160	0.971284	34.1602
BERNOULLI	Urban100	img_028_SRF_2_HR	170	0.967142	33.3426
BERNOULLI	Urban100	img_028_SRF_2_HR	180	0.96106	32.6211
BERNOULLI	Urban100	img_028_SRF_2_HR	190	0.952971	31.4806
BERNOULLI	Urban100	img_028_SRF_2_HR	200	0.942907	30.7253
BERNOULLI	Urban100	img_028_SRF_2_HR	210	0.933935	29.6781
BERNOULLI	Urban100	img_028_SRF_2_HR	220	0.913807	28.7626
BERNOULLI	Urban100	img_028_SRF_2_HR	230	0.879706	27.1101
BERNOULLI	Urban100	img_028_SRF_2_HR	240	0.820587	25.2875
BERNOULLI	Urban100	img_012_SRF_2_HR	150	0.935161	28.8118
BERNOULLI	Urban100	img_012_SRF_2_HR	160	0.925033	28.1604
BERNOULLI	Urban100	img_012_SRF_2_HR	170	0.912536	27.4179
BERNOULLI	Urban100	img_012_SRF_2_HR	180	0.897475	26.7489
BERNOULLI	Urban100	img_012_SRF_2_HR	190	0.877756	25.9938
BERNOULLI	Urban100	img_012_SRF_2_HR	200	0.85538	25.3295
BERNOULLI	Urban100	img_012_SRF_2_HR	210	0.825726	24.5639
BERNOULLI	Urban100	img_012_SRF_2_HR	220	0.783211	23.589
BERNOULLI	Urban100	img_012_SRF_2_HR	230	0.723369	22.5895
BERNOULLI	Urban100	img_012_SRF_2_HR	240	0.63406	21.1314
BERNOULLI	Urban100	img_061_SRF_2_HR	150	0.931039	28.5975
BERNOULLI	Urban100	img_061_SRF_2_HR	160	0.917551	27.7641
BERNOULLI	Urban100	img_061_SRF_2_HR	170	0.905328	27.1772
BERNOULLI	Urban100	img_061_SRF_2_HR	180	0.890319	26.5585
BERNOULLI	Urban100	img_061_SRF_2_HR	190	0.871197	25.8777
BERNOULLI	Urban100	img_061_SRF_2_HR	200	0.846066	25.0697
BERNOULLI	Urban100	img_061_SRF_2_HR	210	0.817415	24.2787
BERNOULLI	Urban100	img_061_SRF_2_HR	220	0.771809	23.272
BERNOULLI	Urban100	img_061_SRF_2_HR	230	0.706697	22.2118
BERNOULLI	Urban100	img_061_SRF_2_HR	240	0.596966	20.4808
BERNOULLI	Urban100	img_009_SRF_2_HR	150	0.984519	39.4044
BERNOULLI	Urban100	img_009_SRF_2_HR	160	0.981896	38.3079
BERNOULLI	Urban100	img_009_SRF_2_HR	170	0.978471	36.993
BERNOULLI	Urban100	img_009_SRF_2_HR	180	0.975242	36.7803
BERNOULLI	Urban100	img_009_SRF_2_HR	190	0.970522	35.6746
BERNOULLI	Urban100	img_009_SRF_2_HR	200	0.964408	34.9141
BERNOULLI	Urban100	img_009_SRF_2_HR	210	0.952921	33.5737
BERNOULLI	Urban100	img_009_SRF_2_HR	220	0.936755	32.2917
BERNOULLI	Urban100	img_009_SRF_2_HR	230	0.914194	31.2344
BERNOULLI	Urban100	img_009_SRF_2_HR	240	0.860837	29.2844
BERNOULLI	Urban100	img_026_SRF_2_HR	150	0.970012	36.5669
BERNOULLI	Urban100	img_026_SRF_2_HR	160	0.965064	35.8102
BERNOULLI	Urban100	img_026_SRF_2_HR	170	0.961327	35.2703
BERNOULLI	Urban100	img_026_SRF_2_HR	180	0.954378	33.8819
BERNOULLI	Urban100	img_026_SRF_2_HR	190	0.947255	33.4119
BERNOULLI	Urban100	img_026_SRF_2_HR	200	0.93608	32.1497
BERNOULLI	Urban100	img_026_SRF_2_HR	210	0.918201	30.7901
BERNOULLI	Urban100	img_026_SRF_2_HR	220	0.896257	29.5195
BERNOULLI	Urban100	img_026_SRF_2_HR	230	0.85123	27.3922
BERNOULLI	Urban100	img_026_SRF_2_HR	240	0.784313	25.43
BERNOULLI	Urban100	img_080_SRF_2_HR	150	0.983518	39.3525
BERNOULLI	Urban100	img_080_SRF_2_HR	160	0.98047	38.3134
BERNOULLI	Urban100	img_080_SRF_2_HR	170	0.977605	37.5806
BERNOULLI	Urban100	img_080_SRF_2_HR	180	0.972894	36.5609
BERNOULLI	Urban100	img_080_SRF_2_HR	190	0.968417	35.8498
BERNOULLI	Urban100	img_080_SRF_2_HR	200	0.959337	34.6402
BERNOULLI	Urban100	img_080_SRF_2_HR	210	0.950835	33.7577
BERNOULLI	Urban100	img_080_SRF_2_HR	220	0.936595	32.5956
BERNOULLI	Urban100	img_080_SRF_2_HR	230	0.914503	30.9411
BERNOULLI	Urban100	img_080_SRF_2_HR	240	0.86249	28.7381
BERNOULLI	Urban100	img_025_SRF_2_HR	150	0.982022	37.0561
BERNOULLI	Urban100	img_025_SRF_2_HR	160	0.980295	36.319
BERNOULLI	Urban100	img_025_SRF_2_HR	170	0.976257	35.4517
BERNOULLI	Urban100	img_025_SRF_2_HR	180	0.972205	34.536
BERNOULLI	Urban100	img_025_SRF_2_HR	190	0.96726	33.5292
BERNOULLI	Urban100	img_025_SRF_2_HR	200	0.959577	32.008
BERNOULLI	Urban100	img_025_SRF_2_HR	210	0.950567	30.8368
BERNOULLI	Urban100	img_025_SRF_2_HR	220	0.933849	28.7925
BERNOULLI	Urban100	img_025_SRF_2_HR	230	0.90924	26.9506
BERNOULLI	Urban100	img_025_SRF_2_HR	240	0.846731	23.7209
BERNOULLI	Urban100	img_094_SRF_2_HR	150	0.949698	32.1787
BERNOULLI	Urban100	img_094_SRF_2_HR	160	0.941188	31.5837
BERNOULLI	Urban100	img_094_SRF_2_HR	170	0.932412	30.753
BERNOULLI	Urban100	img_094_SRF_2_HR	180	0.920999	29.9109
BERNOULLI	Urban100	img_094_SRF_2_HR	190	0.910198	29.3227
BERNOULLI	Urban100	img_094_SRF_2_HR	200	0.894369	28.5754
BERNOULLI	Urban100	img_094_SRF_2_HR	210	0.86613	27.3432
BERNOULLI	Urban100	img_094_SRF_2_HR	220	0.836708	26.2579
BERNOULLI	Urban100	img_094_SRF_2_HR	230	0.786174	24.8472
BERNOULLI	Urban100	img_094_SRF_2_HR	240	0.716524	23.3586
BERNOULLI	Urban100	img_030_SRF_2_HR	150	0.957498	28.2724
BERNOULLI	Urban100	img_030_SRF_2_HR	160	0.948872	27.4435
BERNOULLI	Urban100	img_030_SRF_2_HR	170	0.939883	26.6664
BERNOULLI	Urban100	img_030_SRF_2_HR	180	0.927621	25.8264
BERNOULLI	Urban100	img_030_SRF_2_HR	190	0.909741	24.8351
BERNOULLI	Urban100	img_030_SRF_2_HR	200	0.885296	23.8083
BERNOULLI	Urban100	img_030_SRF_2_HR	210	0.855936	22.8646
BERNOULLI	Urban100	img_030_SRF_2_HR	220	0.814098	21.6869
BERNOULLI	Urban100	img_030_SRF_2_HR	230	0.735843	19.9222
BERNOULLI	Urban100	img_030_SRF_2_HR	240	0.60883	18.0823
BERNOULLI	Urban100	img_048_SRF_2_HR	150	0.926808	23.1395
BERNOULLI	Urban100	img_048_SRF_2_HR	160	0.91512	22.5394
BERNOULLI	Urban100	img_048_SRF_2_HR	170	0.89987	21.8101
BERNOULLI	Urban100	img_048_SRF_2_HR	180	0.882872	21.1146
BERNOULLI	Urban100	img_048_SRF_2_HR	190	0.867296	20.6596
BERNOULLI	Urban100	img_048_SRF_2_HR	200	0.840804	19.9196
BERNOULLI	Urban100	img_048_SRF_2_HR	210	0.810315	19.157
BERNOULLI	Urban100	img_048_SRF_2_HR	220	0.766299	18.3334
BERNOULLI	Urban100	img_048_SRF_2_HR	230	0.711393	17.3971
BERNOULLI	Urban100	img_048_SRF_2_HR	240	0.632256	16.2878
BERNOULLI	Urban100	img_037_SRF_2_HR	150	0.929415	27.5078
BERNOULLI	Urban100	img_037_SRF_2_HR	160	0.916187	26.685
BERNOULLI	Urban100	img_037_SRF_2_HR	170	0.902789	26.0211
BERNOULLI	Urban100	img_037_SRF_2_HR	180	0.885406	25.2047
BERNOULLI	Urban100	img_037_SRF_2_HR	190	0.864177	24.4775
BERNOULLI	Urban100	img_037_SRF_2_HR	200	0.834972	23.508
BERNOULLI	Urban100	img_037_SRF_2_HR	210	0.800928	22.6476
BERNOULLI	Urban100	img_037_SRF_2_HR	220	0.757297	21.6933
BERNOULLI	Urban100	img_037_SRF_2_HR	230	0.694314	20.5536
BERNOULLI	Urban100	img_037_SRF_2_HR	240	0.591318	19.1137
BERNOULLI	Urban100	img_057_SRF_2_HR	150	0.959417	31.5629
BERNOULLI	Urban100	img_057_SRF_2_HR	160	0.953321	30.9765
BERNOULLI	Urban100	img_057_SRF_2_HR	170	0.942476	29.8228
BERNOULLI	Urban100	img_057_SRF_2_HR	180	0.934269	29.1636
BERNOULLI	Urban100	img_057_SRF_2_HR	190	0.91796	28.0257
BERNOULLI	Urban100	img_057_SRF_2_HR	200	0.896261	26.783
BERNOULLI	Urban100	img_057_SRF_2_HR	210	0.872289	25.6521
BERNOULLI	Urban100	img_057_SRF_2_HR	220	0.838796	24.4288
BERNOULLI	Urban100	img_057_SRF_2_HR	230	0.782362	22.5511
BERNOULLI	Urban100	img_057_SRF_2_HR	240	0.699999	20.6972
BERNOULLI	Urban100	img_093_SRF_2_HR	150	0.9693	31.5309
BERNOULLI	Urban100	img_093_SRF_2_HR	160	0.964722	30.4937
BERNOULLI	Urban100	img_093_SRF_2_HR	170	0.959567	29.8542
BERNOULLI	Urban100	img_093_SRF_2_HR	180	0.953188	28.7571
BERNOULLI	Urban100	img_093_SRF_2_HR	190	0.944403	27.908
BERNOULLI	Urban100	img_093_SRF_2_HR	200	0.9299	26.1649
BERNOULLI	Urban100	img_093_SRF_2_HR	210	0.92061	25.5369
BERNOULLI	Urban100	img_093_SRF_2_HR	220	0.897871	24.33
BERNOULLI	Urban100	img_093_SRF_2_HR	230	0.854827	22.132
BERNOULLI	Urban100	img_093_SRF_2_HR	240	0.770693	19.6716
BERNOULLI	Urban100	img_003_SRF_2_HR	150	0.913403	28.3147
BERNOULLI	Urban100	img_003_SRF_2_HR	160	0.900763	27.6519
BERNOULLI	Urban100	img_003_SRF_2_HR	170	0.885751	27.0324
BERNOULLI	Urban100	img_003_SRF_2_HR	180	0.866468	26.2874
BERNOULLI	Urban100	img_003_SRF_2_HR	190	0.844986	25.6881
BERNOULLI	Urban100	img_003_SRF_2_HR	200	0.82114	24.8832
BERNOULLI	Urban100	img_003_SRF_2_HR	210	0.780629	23.991
BERNOULLI	Urban100	img_003_SRF_2_HR	220	0.74129	23.1089
BERNOULLI	Urban100	img_003_SRF_2_HR	230	0.678235	21.8622
BERNOULLI	Urban100	img_003_SRF_2_HR	240	0.570012	20.2726
BERNOULLI	Urban100	img_021_SRF_2_HR	150	0.935173	33.7032
BERNOULLI	Urban100	img_021_SRF_2_HR	160	0.926556	32.8609
BERNOULLI	Urban100	img_021_SRF_2_HR	170	0.918941	32.2241
BERNOULLI	Urban100	img_021_SRF_2_HR	180	0.908106	31.3035
BERNOULLI	Urban100	img_021_SRF_2_HR	190	0.895328	30.3007
BERNOULLI	Urban100	img_021_SRF_2_HR	200	0.881476	29.6454
BERNOULLI	Urban100	img_021_SRF_2_HR	210	0.860948	28.573
BERNOULLI	Urban100	img_021_SRF_2_HR	220	0.835025	27.2972
BERNOULLI	Urban100	img_021_SRF_2_HR	230	0.796641	25.9518
BERNOULLI	Urban100	img_021_SRF_2_HR	240	0.730737	24.1176
BERNOULLI	Urban100	img_064_SRF_2_HR	150	0.958542	31.3559
BERNOULLI	Urban100	img_064_SRF_2_HR	160	0.95065	30.5152
BERNOULLI	Urban100	img_064_SRF_2_HR	170	0.942391	29.8173
BERNOULLI	Urban100	img_064_SRF_2_HR	180	0.929449	28.8803
BERNOULLI	Urban100	img_064_SRF_2_HR	190	0.916974	28.0228
BERNOULLI	Urban100	img_064_SRF_2_HR	200	0.898745	27.0512
BERNOULLI	Urban100	img_064_SRF_2_HR	210	0.874319	25.982
BERNOULLI	Urban100	img_064_SRF_2_HR	220	0.842157	24.9744
BERNOULLI	Urban100	img_064_SRF_2_HR	230	0.78696	23.5544
BERNOULLI	Urban100	img_064_SRF_2_HR	240	0.693171	21.7697
BERNOULLI	Urban100	img_091_SRF_2_HR	150	0.905232	27.033
BERNOULLI	Urban100	img_091_SRF_2_HR	160	0.889712	26.367
BERNOULLI	Urban100	img_091_SRF_2_HR	170	0.870582	25.6173
BERNOULLI	Urban100	img_091_SRF_2_HR	180	0.852303	25.0368
BERNOULLI	Urban100	img_091_SRF_2_HR	190	0.830058	24.4204
BERNOULLI	Urban100	img_091_SRF_2_HR	200	0.797069	23.5959
BERNOULLI	Urban100	img_091_SRF_2_HR	210	0.763105	22.9175
BERNOULLI	Urban100	img_091_SRF_2_HR	220	0.712245	22.0065
BERNOULLI	Urban100	img_091_SRF_2_HR	230	0.643213	21.0857
BERNOULLI	Urban100	img_091_SRF_2_HR	240	0.52426	19.6062
BERNOULLI	Urban100	img_011_SRF_2_HR	150	0.963891	26.3861
BERNOULLI	Urban100	img_011_SRF_2_HR	160	0.962137	26.3157
BERNOULLI	Urban100	img_011_SRF_2_HR	170	0.955669	25.5952
BERNOULLI	Urban100	img_011_SRF_2_HR	180	0.948223	24.7979
BERNOULLI	Urban100	img_011_SRF_2_HR	190	0.939151	23.8245
BERNOULLI	Urban100	img_011_SRF_2_HR	200	0.924758	22.6596
BERNOULLI	Urban100	img_011_SRF_2_HR	210	0.902303	21.1239
BERNOULLI	Urban100	img_011_SRF_2_HR	220	0.869011	19.5075
BERNOULLI	Urban100	img_011_SRF_2_HR	230	0.783518	16.7776
BERNOULLI	Urban100	img_011_SRF_2_HR	240	0.625462	13.5649
BERNOULLI	Urban100	img_031_SRF_2_HR	150	0.890074	21.5471
BERNOULLI	Urban100	img_031_SRF_2_HR	160	0.880042	21.6756
BERNOULLI	Urban100	img_031_SRF_2_HR	170	0.864652	21.2669
BERNOULLI	Urban100	img_031_SRF_2_HR	180	0.849218	20.0661
BERNOULLI	Urban100	img_031_SRF_2_HR	190	0.827819	20.7167
BERNOULLI	Urban100	img_031_SRF_2_HR	200	0.801841	19.4343
BERNOULLI	Urban100	img_031_SRF_2_HR	210	0.775386	18.499
BERNOULLI	Urban100	img_031_SRF_2_HR	220	0.733429	19.0073
BERNOULLI	Urban100	img_031_SRF_2_HR	230	0.671582	19.5026
BERNOULLI	Urban100	img_031_SRF_2_HR	240	0.580695	18.2626
BERNOULLI	Urban100	img_035_SRF_2_HR	150	0.974941	32.8513
BERNOULLI	Urban100	img_035_SRF_2_HR	160	0.971276	32.1933
BERNOULLI	Urban100	img_035_SRF_2_HR	170	0.965789	31.3155
BERNOULLI	Urban100	img_035_SRF_2_HR	180	0.959361	30.5889
BERNOULLI	Urban100	img_035_SRF_2_HR	190	0.949375	29.3951
BERNOULLI	Urban100	img_035_SRF_2_HR	200	0.937766	28.2192
BERNOULLI	Urban100	img_035_SRF_2_HR	210	0.919065	26.9729
BERNOULLI	Urban100	img_035_SRF_2_HR	220	0.891428	25.68
BERNOULLI	Urban100	img_035_SRF_2_HR	230	0.840481	23.5042
BERNOULLI	Urban100	img_035_SRF_2_HR	240	0.7419	20.8633
BERNOULLI	Urban100	img_098_SRF_2_HR	150	0.864141	26.0602
BERNOULLI	Urban100	img_098_SRF_2_HR	160	0.846117	25.5218
BERNOULLI	Urban100	img_098_SRF_2_HR	170	0.827023	25.0349
BERNOULLI	Urban100	img_098_SRF_2_HR	180	0.803404	24.4303
BERNOULLI	Urban100	img_098_SRF_2_HR	190	0.773925	23.8176
BERNOULLI	Urban100	img_098_SRF_2_HR	200	0.738362	23.0778
BERNOULLI	Urban100	img_098_SRF_2_HR	210	0.694607	22.3747
BERNOULLI	Urban100	img_098_SRF_2_HR	220	0.636368	21.5347
BERNOULLI	Urban100	img_098_SRF_2_HR	230	0.559914	20.5875
BERNOULLI	Urban100	img_098_SRF_2_HR	240	0.460999	19.4822
BERNOULLI	Urban100	img_046_SRF_2_HR	150	0.943106	30.4114
BERNOULLI	Urban100	img_046_SRF_2_HR	160	0.933675	29.795
BERNOULLI	Urban100	img_046_SRF_2_HR	170	0.924905	29.1949
BERNOULLI	Urban100	img_046_SRF_2_HR	180	0.912516	28.5049
BERNOULLI	Urban100	img_046_SRF_2_HR	190	0.898865	27.8701
BERNOULLI	Urban100	img_046_SRF_2_HR	200	0.879765	27.0798
BERNOULLI	Urban100	img_046_SRF_2_HR	210	0.854378	26.2208
BERNOULLI	Urban100	img_046_SRF_2_HR	220	0.820876	25.448
BERNOULLI	Urban100	img_046_SRF_2_HR	230	0.777336	24.3817
BERNOULLI	Urban100	img_046_SRF_2_HR	240	0.709079	23.2354
BERNOULLI	Urban100	img_092_SRF_2_HR	150	0.926172	25.7266
BERNOULLI	Urban100	img_092_SRF_2_HR	160	0.916553	25.1448
BERNOULLI	Urban100	img_092_SRF_2_HR	170	0.899857	24.3066
BERNOULLI	Urban100	img_092_SRF_2_HR	180	0.884355	23.5403
BERNOULLI	Urban100	img_092_SRF_2_HR	190	0.855411	22.4931
BERNOULLI	Urban100	img_092_SRF_2_HR	200	0.831434	21.8151
BERNOULLI	Urban100	img_092_SRF_2_HR	210	0.789422	20.6941
BERNOULLI	Urban100	img_092_SRF_2_HR	220	0.726065	19.452
BERNOULLI	Urban100	img_092_SRF_2_HR	230	0.645129	18.2569
BERNOULLI	Urban100	img_092_SRF_2_HR	240	0.533663	16.8955
BERNOULLI	Urban100	img_055_SRF_2_HR	150	0.985271	37.3598
BERNOULLI	Urban100	img_055_SRF_2_HR	160	0.982941	36.5572
BERNOULLI	Urban100	img_055_SRF_2_HR	170	0.979725	35.6381
BERNOULLI	Urban100	img_055_SRF_2_HR	180	0.976367	34.397
BERNOULLI	Urban100	img_055_SRF_2_HR	190	0.96988	33.179
BERNOULLI	Urban100	img_055_SRF_2_HR	200	0.959671	31.954
BERNOULLI	Urban100	img_055_SRF_2_HR	210	0.948315	30.2915
BERNOULLI	Urban100	img_055_SRF_2_HR	220	0.928584	28.1208
BERNOULLI	Urban100	img_055_SRF_2_HR	230	0.877442	25.3577
BERNOULLI	Urban100	img_055_SRF_2_HR	240	0.774877	22.0976
BERNOULLI	Urban100	img_075_SRF_2_HR	150	0.972095	36.0747
BERNOULLI	Urban100	img_075_SRF_2_HR	160	0.967764	35.29
BERNOULLI	Urban100	img_075_SRF_2_HR	170	0.964077	34.5118
BERNOULLI	Urban100	img_075_SRF_2_HR	180	0.957817	33.5415
BERNOULLI	Urban100	img_075_SRF_2_HR	190	0.948716	32.2485
BERNOULLI	Urban100	img_075_SRF_2_HR	200	0.94137	31.4973
BERNOULLI	Urban100	img_075_SRF_2_HR	210	0.92684	29.6892
BERNOULLI	Urban100	img_075_SRF_2_HR	220	0.90636	28.5004
BERNOULLI	Urban100	img_075_SRF_2_HR	230	0.878486	26.6663
BERNOULLI	Urban100	img_075_SRF_2_HR	240	0.824434	24.1873
BERNOULLI	Urban100	img_036_SRF_2_HR	150	0.970667	33.0054
BERNOULLI	Urban100	img_036_SRF_2_HR	160	0.965579	32.256
BERNOULLI	Urban100	img_036_SRF_2_HR	170	0.959107	31.414
BERNOULLI	Urban100	img_036_SRF_2_HR	180	0.951719	30.3776
BERNOULLI	Urban100	img_036_SRF_2_HR	190	0.94014	29.217
BERNOULLI	Urban100	img_036_SRF_2_HR	200	0.929046	28.3622
BERNOULLI	Urban100	img_036_SRF_2_HR	210	0.908804	27.0054
BERNOULLI	Urban100	img_036_SRF_2_HR	220	0.879516	25.54
BERNOULLI	Urban100	img_036_SRF_2_HR	230	0.832748	23.7233
BERNOULLI	Urban100	img_036_SRF_2_HR	240	0.744125	21.5448
BERNOULLI	Urban100	img_018_SRF_2_HR	150	0.908134	29.5322
BERNOULLI	Urban100	img_018_SRF_2_HR	160	0.897083	29.0172
BERNOULLI	Urban100	img_018_SRF_2_HR	170	0.881045	28.3376
BERNOULLI	Urban100	img_018_SRF_2_HR	180	0.864553	27.8141
BERNOULLI	Urban100	img_018_SRF_2_HR	190	0.845575	27.0616
BERNOULLI	Urban100	img_018_SRF_2_HR	200	0.815905	26.2925
BERNOULLI	Urban100	img_018_SRF_2_HR	210	0.782509	25.3738
BERNOULLI	Urban100	img_018_SRF_2_HR	220	0.726141	24.3397
BERNOULLI	Urban100	img_018_SRF_2_HR	230	0.663105	23.1908
BERNOULLI	Urban100	img_018_SRF_2_HR	240	0.552063	21.749
BERNOULLI	Urban100	img_014_SRF_2_HR	150	0.934581	28.945
BERNOULLI	Urban100	img_014_SRF_2_HR	160	0.925073	28.3854
BERNOULLI	Urban100	img_014_SRF_2_HR	170	0.914596	27.8167
BERNOULLI	Urban100	img_014_SRF_2_HR	180	0.900443	27.1674
BERNOULLI	Urban100	img_014_SRF_2_HR	190	0.88243	26.4118
BERNOULLI	Urban100	img_014_SRF_2_HR	200	0.8582	25.5822
BERNOULLI	Urban100	img_014_SRF_2_HR	210	0.828923	24.7771
BERNOULLI	Urban100	img_014_SRF_2_HR	220	0.791677	23.8527
BERNOULLI	Urban100	img_014_SRF_2_HR	230	0.738997	22.9903
BERNOULLI	Urban100	img_014_SRF_2_HR	240	0.633596	21.406
BERNOULLI	Urban100	img_027_SRF_2_HR	150	0.960764	33.9321
BERNOULLI	Urban100	img_027_SRF_2_HR	160	0.95535	33.2368
BERNOULLI	Urban100	img_027_SRF_2_HR	170	0.949119	32.7517
BERNOULLI	Urban100	img_027_SRF_2_HR	180	0.940521	32.0867
BERNOULLI	Urban100	img_027_SRF_2_HR	190	0.929776	31.1774
BERNOULLI	Urban100	img_027_SRF_2_HR	200	0.916188	30.3852
BERNOULLI	Urban100	img_027_SRF_2_HR	210	0.896813	29.2945
BERNOULLI	Urban100	img_027_SRF_2_HR	220	0.875128	28.409
BERNOULLI	Urban100	img_027_SRF_2_HR	230	0.837433	27.1326
BERNOULLI	Urban100	img_027_SRF_2_HR	240	0.772965	25.2975
BERNOULLI	Urban100	img_042_SRF_2_HR	150	0.978641	32.5191
BERNOULLI	Urban100	img_042_SRF_2_HR	160	0.974785	31.7027
BERNOULLI	Urban100	img_042_SRF_2_HR	170	0.970758	31.126
BERNOULLI	Urban100	img_042_SRF_2_HR	180	0.96371	29.9288
BERNOULLI	Urban100	img_042_SRF_2_HR	190	0.955848	28.9555
BERNOULLI	Urban100	img_042_SRF_2_HR	200	0.9461	28.0471
BERNOULLI	Urban100	img_042_SRF_2_HR	210	0.929163	26.6784
BERNOULLI	Urban100	img_042_SRF_2_HR	220	0.902081	25.1414
BERNOULLI	Urban100	img_042_SRF_2_HR	230	0.854748	23.2135
[truncated: 4,937 more rows]

## Sheet: SSIM Pivot
Average of SSIM	Column Labels
Row Labels	15	25	50	60	150	160	170	180	190	200	210	220	230	240	(blank)	Grand Total
BERNOULLI					0.930398	0.920793	0.909696	0.896408	0.880259	0.85998	0.834631	0.800055	0.750178	0.670943		0.845334
BSD68					0.916439	0.904287	0.891236	0.875784	0.857631	0.835775	0.809602	0.775743	0.730734	0.66432		0.826155
Kodak24					0.930974	0.921364	0.910601	0.897613	0.881916	0.86359	0.840514	0.811018	0.770664	0.710813		0.853907
Set12					0.94345	0.936731	0.928604	0.918728	0.906394	0.892043	0.872135	0.847656	0.809206	0.747284		0.880223
Urban100					0.938186	0.929968	0.919762	0.907466	0.892113	0.871726	0.845738	0.808243	0.7514	0.656717		0.852132
GUASSIAN	0.905679	0.856569	0.756039	0.724235												0.810631
BSD68	0.889254	0.829989	0.719152	0.686889												0.781321
Kodak24	0.886492	0.83274	0.734206	0.707029												0.790117
Set12	0.900112	0.861077	0.782959	0.758319												0.825617
Urban100	0.922121	0.879822	0.783131	0.749669												0.833686
POISSON					0.949095	0.945992	0.943818	0.940765	0.937204	0.932763	0.930245	0.926349	0.923231	0.917007		0.934647
BSD68					0.943268	0.939558	0.937128	0.932993	0.930056	0.92599	0.921994	0.918288	0.915082	0.908052		0.927241
Kodak24					0.964834	0.959296	0.958313	0.954889	0.951305	0.947796	0.945051	0.941309	0.937974	0.930056		0.949082
Set12					0.974812	0.973707	0.972109	0.970117	0.967797	0.964737	0.963631	0.962547	0.95905	0.956688		0.966519
Urban100					0.946194	0.943849	0.941493	0.939139	0.935009	0.929924	0.928297	0.923896	0.920937	0.915202		0.932394
SAP					0.92934	0.919731	0.908463	0.894909	0.878494	0.858489	0.832174	0.797016	0.747064	0.666352		0.843203
BSD68					0.915167	0.90369	0.89035	0.874663	0.85611	0.834749	0.807621	0.773412	0.728724	0.661674		0.824616
Kodak24					0.929337	0.919832	0.90856	0.89538	0.879714	0.861324	0.837505	0.807401	0.767563	0.706837		0.851345
Set12					0.943141	0.935807	0.927797	0.917497	0.905272	0.891276	0.872076	0.846216	0.807993	0.746564		0.879364
Urban100					0.937323	0.928685	0.918436	0.905852	0.890208	0.870017	0.842802	0.804671	0.747304	0.65019		0.849549
(blank)
(blank)
Grand Total	0.905679	0.856569	0.756039	0.724235	0.936278	0.928839	0.920659	0.910694	0.898652	0.883744	0.865683	0.84114	0.806825	0.751434		0.866893

## Sheet: PSNR Pivot
Average of PSNR	Column Labels
Row Labels	15	25	50	60	150	160	170	180	190	200	210	220	230	240	(blank)	Grand Total
BERNOULLI					30.1028	29.4763	28.8356	28.1484	27.4337	26.6364	25.7767	24.8093	23.6082	22.0581		26.6885
BSD68					30.8271	30.1671	29.5811	28.9218	28.2585	27.5462	26.7816	25.9306	24.8999	23.5758		27.649
Kodak24					30.7841	30.3272	29.8813	29.3873	28.8528	28.2889	27.6112	26.886	25.9317	24.6931		28.2644
Set12					32.0376	31.3909	30.7959	30.1653	29.3674	28.4853	27.5811	26.6427	25.2527	23.4509		28.517
Urban100					29.2146	28.5726	27.8424	27.0832	26.3001	25.3993	24.4366	23.3283	21.9749	20.2265		25.4379
GUASSIAN	31.3779	29.0817	25.986	25.1897												27.9088
BSD68	31.2844	29.0518	26.1937	25.4809												28.0027
Kodak24	32.2698	30.2055	27.4558	26.7437												29.1687
Set12	32.429	30.2284	27.1186	26.3312												29.0268
Urban100	31.1012	28.6946	25.3561	24.4817												27.4084
POISSON					31.4767	31.1907	30.993	30.8337	30.5834	30.3437	30.157	29.9957	29.7918	29.5426		30.4908
BSD68					31.9482	31.6363	31.4839	31.2967	31.0278	30.8884	30.6458	30.5179	30.3665	30.1054		30.9917
Kodak24					33.7589	33.3353	33.1895	32.9444	32.7617	32.5296	32.3896	32.2084	31.9603	31.748		32.6826
Set12					34.2577	34.0758	33.7474	33.5517	33.2834	33.0815	32.8131	32.6892	32.35	32.173		33.2023
Urban100					30.2746	30.0267	29.8015	29.6862	29.4344	29.1203	28.9702	28.7863	28.5736	28.3149		29.2989
SAP					29.8678	29.2691	28.6362	27.9732	27.2547	26.4916	25.6181	24.6459	23.4684	21.8957		26.5121
BSD68					30.6813	30.1032	29.4876	28.8488	28.1662	27.4878	26.7118	25.8392	24.8511	23.4678		27.5645
Kodak24					30.5394	30.1104	29.6719	29.1746	28.6485	28.1048	27.4209	26.694	25.7985	24.5153		28.0678
Set12					32.0449	31.4035	30.7948	30.0219	29.2627	28.485	27.6789	26.4978	25.2151	23.5021		28.4907
Urban100					28.8921	28.2439	27.5497	26.8435	26.0593	25.1879	24.1943	23.1207	21.7593	20.0052		25.1856
(blank)
(blank)
Grand Total	31.3779	29.0817	25.986	25.1897	30.4824	29.9787	29.4883	28.9851	28.4239	27.8239	27.1839	26.4836	25.6228	24.4988		27.8985
