# Supplementary material for: MPDenoiseNet: Resource-Efficient Deep Learning Approach for Image Denoising
Source: Research Square preprint supplement (doi:10.21203/rs.3.rs-6641644/v1), 2025-05-20
Supplement: Supplementary file 19 [file Restormer Experiment Results.xlsx.xlsx]

## Sheet: Sheet2
Average of PSNR	Column Labels
Row Labels	15	25	50	60	150	160	170	180	190	200	210	220	230	240	(blank)	Grand Total
BERNOULLI					29.8399	29.2539	28.6477	28.0032	27.3077	26.5571	25.7459	24.7992	23.6456	22.1894		26.599
BSD68					30.6848	30.0777	29.4677	28.8121	28.1197	27.4176	26.6648	25.8543	24.8257	23.5667		27.5491
Kodak24					30.6713	30.2068	29.771	29.2749	28.7536	28.1913	27.568	26.8236	25.9739	24.8029		28.2037
Set12					32.3025	31.6256	30.9122	30.2718	29.4365	28.5656	27.6608	26.559	25.1609	23.529		28.6024
Urban100					28.7703	28.1805	27.5488	26.8757	26.153	25.3387	24.4539	23.3846	22.1026	20.4648		25.3273
GUASSIAN	31.0521	28.8701	25.7556	24.9551												27.6582
BSD68	31.2238	28.933	26.0257	25.3096												27.873
Kodak24	32.3282	30.1163	27.2736	26.5494												29.0669
Set12	32.548	30.2592	27.0467	26.1339												28.997
Urban100	30.4496	28.3616	25.0527	24.19												27.0135
POISSON					30.1548	29.9606	29.7907	29.6292	29.4542	29.2991	29.1889	29.0499	28.9853	28.8649		29.4378
BSD68					31.8195	31.4924	31.4133	31.1551	30.8918	30.7447	30.6313	30.5044	30.2922	30.1541		30.9099
Kodak24					29.1882	29.0082	28.9445	28.9206	28.9139	28.7583	28.8396	28.645	28.6997	28.7147		28.8633
Set12					34.0433	33.8581	33.6159	33.1308	33.0112	32.693	32.5231	32.3027	32.171	31.9645		32.9314
Urban100					28.7882	28.6799	28.4314	28.3414	28.1795	28.0387	27.8918	27.7678	27.7828	27.6524		28.1554
SAP					29.2726	28.7123	28.1041	27.5226	26.8702	26.1747	25.3204	24.4089	23.3136	21.9006		26.16
BSD68					30.4798	29.875	29.2685	28.6482	28.0168	27.327	26.5577	25.7415	24.7573	23.5002		27.4172
Kodak24					30.1073	29.7703	29.3821	28.9323	28.4826	27.9172	27.3171	26.6197	25.7826	24.668		27.8979
Set12					32.3473	31.63	30.9623	30.1994	29.371	28.6705	27.5791	26.5367	25.1568	23.4649		28.5918
Urban100					27.8824	27.3177	26.6626	26.0977	25.4035	24.6735	23.7288	22.7168	21.5182	19.961		24.5962
(blank)
(blank)
Grand Total	31.0521	28.8701	25.7556	24.9551	29.7558	29.3089	28.8475	28.385	27.8774	27.3437	26.7517	26.086	25.3148	24.3183		27.4294

## Sheet: Sheet3
Average of SSIM	Column Labels
Row Labels	15	25	50	60	150	160	170	180	190	200	210	220	230	240	(blank)	Grand Total
BERNOULLI					0.930734	0.921473	0.91044	0.897417	0.881508	0.861985	0.836451	0.80256	0.754199	0.679472		0.847624
BSD68					0.917102	0.905131	0.891719	0.87604	0.857628	0.835857	0.808479	0.775142	0.729783	0.665943		0.826282
Kodak24					0.932278	0.922529	0.911078	0.89817	0.882737	0.864428	0.841409	0.812376	0.773111	0.715642		0.855376
Set12					0.946109	0.938849	0.930667	0.920533	0.908895	0.893864	0.874329	0.847274	0.810453	0.752869		0.882384
Urban100					0.937788	0.930247	0.920591	0.908998	0.894164	0.87534	0.849736	0.813484	0.759513	0.671184		0.856104
GUASSIAN	0.9075	0.856207	0.750041	0.716637												0.807596
BSD68	0.889973	0.827654	0.715877	0.682769												0.779068
Kodak24	0.886978	0.829834	0.730721	0.703224												0.787689
Set12	0.901909	0.860496	0.778327	0.751204												0.822984
Urban100	0.925015	0.881438	0.774514	0.738737												0.829926
POISSON					0.951174	0.948179	0.945894	0.942927	0.940354	0.937594	0.935204	0.932779	0.930259	0.927706		0.939207
BSD68					0.945983	0.940815	0.938981	0.934119	0.931261	0.927782	0.924463	0.921612	0.919071	0.91614		0.930023
Kodak24					0.96393	0.960918	0.958959	0.956291	0.954015	0.950762	0.949283	0.945259	0.942428	0.940592		0.952244
Set12					0.977194	0.976854	0.975073	0.972576	0.971744	0.970007	0.968091	0.966318	0.965195	0.961298		0.970435
Urban100					0.94852	0.946687	0.943957	0.942151	0.939492	0.937216	0.935183	0.933352	0.930754	0.928448		0.938576
SAP					0.927811	0.918229	0.907018	0.893836	0.877533	0.857141	0.831099	0.796843	0.747709	0.670404		0.842762
BSD68					0.915386	0.903537	0.889899	0.874267	0.855667	0.833093	0.805874	0.772291	0.726801	0.661479		0.823829
Kodak24					0.929408	0.919932	0.90875	0.895219	0.879742	0.860612	0.837461	0.807417	0.76817	0.710059		0.851677
Set12					0.945643	0.937834	0.929852	0.919664	0.90696	0.892673	0.872558	0.845536	0.807899	0.746418		0.880504
Urban100					0.933736	0.925459	0.915503	0.903711	0.888341	0.868397	0.84175	0.805157	0.749793	0.657834		0.848968
(blank)
(blank)
Grand Total	0.9075	0.856207	0.750041	0.716637	0.936573	0.929294	0.921117	0.911393	0.899798	0.885573	0.867585	0.844061	0.810722	0.759194		0.868421

## Sheet: Sheet1
noise_type	dataset	im_index	noise_parameter	SSIM	PSNR
BERNOULLI	Kodak24	kodim11	150	0.927968	30.2703
BERNOULLI	Kodak24	kodim11	160	0.915772	29.6889
BERNOULLI	Kodak24	kodim11	170	0.902067	29.2564
BERNOULLI	Kodak24	kodim11	180	0.888454	28.7024
BERNOULLI	Kodak24	kodim11	190	0.870166	28.2269
BERNOULLI	Kodak24	kodim11	200	0.849978	27.6051
BERNOULLI	Kodak24	kodim11	210	0.822354	26.8342
BERNOULLI	Kodak24	kodim11	220	0.791485	26.244
BERNOULLI	Kodak24	kodim11	230	0.745193	25.2667
BERNOULLI	Kodak24	kodim11	240	0.685179	24.21
BERNOULLI	Kodak24	kodim05	150	0.945666	28.7768
BERNOULLI	Kodak24	kodim05	160	0.933589	28.0969
BERNOULLI	Kodak24	kodim05	170	0.918086	27.3776
BERNOULLI	Kodak24	kodim05	180	0.901639	26.6601
BERNOULLI	Kodak24	kodim05	190	0.877883	25.756
BERNOULLI	Kodak24	kodim05	200	0.85141	25.0191
BERNOULLI	Kodak24	kodim05	210	0.811155	23.9669
BERNOULLI	Kodak24	kodim05	220	0.764878	23.076
BERNOULLI	Kodak24	kodim05	230	0.696908	21.9584
BERNOULLI	Kodak24	kodim05	240	0.594462	20.3145
BERNOULLI	Kodak24	kodim04	150	0.936077	32.3785
BERNOULLI	Kodak24	kodim04	160	0.926663	32.0169
BERNOULLI	Kodak24	kodim04	170	0.91688	31.8227
BERNOULLI	Kodak24	kodim04	180	0.903868	31.4086
BERNOULLI	Kodak24	kodim04	190	0.891823	31.088
BERNOULLI	Kodak24	kodim04	200	0.874493	30.5751
BERNOULLI	Kodak24	kodim04	210	0.856617	30.085
BERNOULLI	Kodak24	kodim04	220	0.832133	29.4335
BERNOULLI	Kodak24	kodim04	230	0.8009	28.805
BERNOULLI	Kodak24	kodim04	240	0.762323	27.6509
BERNOULLI	Kodak24	kodim10	150	0.959362	32.0366
BERNOULLI	Kodak24	kodim10	160	0.955087	32.2228
BERNOULLI	Kodak24	kodim10	170	0.948629	31.6766
BERNOULLI	Kodak24	kodim10	180	0.943191	31.3975
BERNOULLI	Kodak24	kodim10	190	0.933995	30.8991
BERNOULLI	Kodak24	kodim10	200	0.924052	30.1796
BERNOULLI	Kodak24	kodim10	210	0.91218	29.6151
BERNOULLI	Kodak24	kodim10	220	0.88922	28.3426
BERNOULLI	Kodak24	kodim10	230	0.85938	27.248
BERNOULLI	Kodak24	kodim10	240	0.813138	26.2531
BERNOULLI	Kodak24	kodim06	150	0.918929	29.0369
BERNOULLI	Kodak24	kodim06	160	0.906491	28.5307
BERNOULLI	Kodak24	kodim06	170	0.89202	28.0008
BERNOULLI	Kodak24	kodim06	180	0.873727	27.4674
BERNOULLI	Kodak24	kodim06	190	0.853836	26.9858
BERNOULLI	Kodak24	kodim06	200	0.829144	26.3604
BERNOULLI	Kodak24	kodim06	210	0.797972	25.7318
BERNOULLI	Kodak24	kodim06	220	0.758924	24.9971
BERNOULLI	Kodak24	kodim06	230	0.705131	24.2806
BERNOULLI	Kodak24	kodim06	240	0.632737	23.2219
BERNOULLI	Kodak24	kodim12	150	0.947966	33.7436
BERNOULLI	Kodak24	kodim12	160	0.941153	33.2431
BERNOULLI	Kodak24	kodim12	170	0.932893	32.9846
BERNOULLI	Kodak24	kodim12	180	0.922488	32.3126
BERNOULLI	Kodak24	kodim12	190	0.911853	31.896
BERNOULLI	Kodak24	kodim12	200	0.899339	31.4454
BERNOULLI	Kodak24	kodim12	210	0.881964	30.8542
BERNOULLI	Kodak24	kodim12	220	0.863275	30.0859
BERNOULLI	Kodak24	kodim12	230	0.836514	29.2983
BERNOULLI	Kodak24	kodim12	240	0.793568	27.5927
BERNOULLI	Kodak24	kodim13	150	0.83464	24.3877
BERNOULLI	Kodak24	kodim13	160	0.810118	23.847
BERNOULLI	Kodak24	kodim13	170	0.781982	23.3249
BERNOULLI	Kodak24	kodim13	180	0.75256	22.8262
BERNOULLI	Kodak24	kodim13	190	0.718872	22.3355
BERNOULLI	Kodak24	kodim13	200	0.678992	21.7701
BERNOULLI	Kodak24	kodim13	210	0.63151	21.2325
BERNOULLI	Kodak24	kodim13	220	0.576741	20.5907
BERNOULLI	Kodak24	kodim13	230	0.512093	20.0454
BERNOULLI	Kodak24	kodim13	240	0.426495	19.3005
BERNOULLI	Kodak24	kodim07	150	0.976207	33.4233
BERNOULLI	Kodak24	kodim07	160	0.973079	33.1504
BERNOULLI	Kodak24	kodim07	170	0.96834	32.5903
BERNOULLI	Kodak24	kodim07	180	0.963059	32.127
BERNOULLI	Kodak24	kodim07	190	0.956893	31.5101
BERNOULLI	Kodak24	kodim07	200	0.946953	30.7428
BERNOULLI	Kodak24	kodim07	210	0.935608	30.0452
BERNOULLI	Kodak24	kodim07	220	0.918598	29.0184
BERNOULLI	Kodak24	kodim07	230	0.89037	27.82
BERNOULLI	Kodak24	kodim07	240	0.844479	26.0285
BERNOULLI	Kodak24	kodim03	150	0.969435	33.143
BERNOULLI	Kodak24	kodim03	160	0.965019	32.8911
BERNOULLI	Kodak24	kodim03	170	0.959695	32.6045
BERNOULLI	Kodak24	kodim03	180	0.953298	32.337
BERNOULLI	Kodak24	kodim03	190	0.944927	31.9603
BERNOULLI	Kodak24	kodim03	200	0.935477	31.6025
BERNOULLI	Kodak24	kodim03	210	0.921178	31.0478
BERNOULLI	Kodak24	kodim03	220	0.903495	30.3183
BERNOULLI	Kodak24	kodim03	230	0.880439	29.7891
BERNOULLI	Kodak24	kodim03	240	0.846738	28.7035
BERNOULLI	Kodak24	kodim17	150	0.95703	34.1482
BERNOULLI	Kodak24	kodim17	160	0.950188	33.2746
BERNOULLI	Kodak24	kodim17	170	0.94344	32.7857
BERNOULLI	Kodak24	kodim17	180	0.936406	32.1789
BERNOULLI	Kodak24	kodim17	190	0.92547	31.3618
BERNOULLI	Kodak24	kodim17	200	0.913232	30.7071
BERNOULLI	Kodak24	kodim17	210	0.89859	29.9236
BERNOULLI	Kodak24	kodim17	220	0.87593	28.957
BERNOULLI	Kodak24	kodim17	230	0.844649	28.1045
BERNOULLI	Kodak24	kodim17	240	0.795186	26.6824
BERNOULLI	Kodak24	kodim16	150	0.936802	30.9847
BERNOULLI	Kodak24	kodim16	160	0.927765	30.6223
BERNOULLI	Kodak24	kodim16	170	0.916694	30.28
BERNOULLI	Kodak24	kodim16	180	0.903394	29.9357
BERNOULLI	Kodak24	kodim16	190	0.888388	29.5984
BERNOULLI	Kodak24	kodim16	200	0.870389	29.1866
BERNOULLI	Kodak24	kodim16	210	0.845876	28.689
BERNOULLI	Kodak24	kodim16	220	0.817492	28.2863
BERNOULLI	Kodak24	kodim16	230	0.777253	27.701
BERNOULLI	Kodak24	kodim16	240	0.718522	26.811
BERNOULLI	Kodak24	kodim02	150	0.926859	32.2099
BERNOULLI	Kodak24	kodim02	160	0.917244	31.8873
BERNOULLI	Kodak24	kodim02	170	0.906351	31.5239
BERNOULLI	Kodak24	kodim02	180	0.894587	31.2615
BERNOULLI	Kodak24	kodim02	190	0.881627	30.895
BERNOULLI	Kodak24	kodim02	200	0.867923	30.5508
BERNOULLI	Kodak24	kodim02	210	0.848157	30.137
BERNOULLI	Kodak24	kodim02	220	0.827687	29.7297
BERNOULLI	Kodak24	kodim02	230	0.798866	29.1019
BERNOULLI	Kodak24	kodim02	240	0.759684	28.5861
BERNOULLI	Kodak24	kodim14	150	0.916302	29.2345
BERNOULLI	Kodak24	kodim14	160	0.905195	28.9129
BERNOULLI	Kodak24	kodim14	170	0.888629	28.2739
BERNOULLI	Kodak24	kodim14	180	0.870504	27.7715
BERNOULLI	Kodak24	kodim14	190	0.849663	27.3486
BERNOULLI	Kodak24	kodim14	200	0.822459	26.7048
BERNOULLI	Kodak24	kodim14	210	0.790755	25.9553
BERNOULLI	Kodak24	kodim14	220	0.751665	25.1976
BERNOULLI	Kodak24	kodim14	230	0.694076	24.2502
BERNOULLI	Kodak24	kodim14	240	0.617861	23.2941
BERNOULLI	Kodak24	kodim01	150	0.893651	28.09
BERNOULLI	Kodak24	kodim01	160	0.877457	27.453
BERNOULLI	Kodak24	kodim01	170	0.859247	27.0627
BERNOULLI	Kodak24	kodim01	180	0.840134	26.63
BERNOULLI	Kodak24	kodim01	190	0.817597	26.1111
BERNOULLI	Kodak24	kodim01	200	0.789605	25.587
BERNOULLI	Kodak24	kodim01	210	0.757355	24.9505
BERNOULLI	Kodak24	kodim01	220	0.717811	24.3495
BERNOULLI	Kodak24	kodim01	230	0.665001	23.6445
BERNOULLI	Kodak24	kodim01	240	0.58759	22.5173
BERNOULLI	Kodak24	kodim15	150	0.939376	30.8939
BERNOULLI	Kodak24	kodim15	160	0.930494	30.485
BERNOULLI	Kodak24	kodim15	170	0.922198	30.3995
BERNOULLI	Kodak24	kodim15	180	0.911904	30.1417
BERNOULLI	Kodak24	kodim15	190	0.900389	29.5732
BERNOULLI	Kodak24	kodim15	200	0.88832	29.298
BERNOULLI	Kodak24	kodim15	210	0.873011	29.2666
BERNOULLI	Kodak24	kodim15	220	0.851878	28.5889
BERNOULLI	Kodak24	kodim15	230	0.829043	28.2399
BERNOULLI	Kodak24	kodim15	240	0.798313	27.168
BERNOULLI	Kodak24	kodim24	150	0.921746	27.6098
BERNOULLI	Kodak24	kodim24	160	0.909212	27.0243
BERNOULLI	Kodak24	kodim24	170	0.897285	26.6458
BERNOULLI	Kodak24	kodim24	180	0.881484	26.1764
BERNOULLI	Kodak24	kodim24	190	0.860286	25.4681
BERNOULLI	Kodak24	kodim24	200	0.836455	24.8662
BERNOULLI	Kodak24	kodim24	210	0.811691	24.3646
BERNOULLI	Kodak24	kodim24	220	0.777277	23.7334
BERNOULLI	Kodak24	kodim24	230	0.723509	22.8778
BERNOULLI	Kodak24	kodim24	240	0.648151	21.8947
BERNOULLI	Kodak24	kodim18	150	0.909823	28.6443
BERNOULLI	Kodak24	kodim18	160	0.896557	28.1216
BERNOULLI	Kodak24	kodim18	170	0.881549	27.7466
BERNOULLI	Kodak24	kodim18	180	0.863017	26.9535
BERNOULLI	Kodak24	kodim18	190	0.841661	26.4705
BERNOULLI	Kodak24	kodim18	200	0.813441	25.8166
BERNOULLI	Kodak24	kodim18	210	0.778712	25.193
BERNOULLI	Kodak24	kodim18	220	0.738245	24.5434
BERNOULLI	Kodak24	kodim18	230	0.68499	23.6997
BERNOULLI	Kodak24	kodim18	240	0.609683	22.6522
BERNOULLI	Kodak24	kodim19	150	0.924579	33.2933
BERNOULLI	Kodak24	kodim19	160	0.914733	32.5276
BERNOULLI	Kodak24	kodim19	170	0.903486	31.9014
BERNOULLI	Kodak24	kodim19	180	0.890878	31.1506
BERNOULLI	Kodak24	kodim19	190	0.875922	30.4227
BERNOULLI	Kodak24	kodim19	200	0.86016	29.5769
BERNOULLI	Kodak24	kodim19	210	0.839173	28.6333
BERNOULLI	Kodak24	kodim19	220	0.811479	27.6453
BERNOULLI	Kodak24	kodim19	230	0.773245	26.0867
BERNOULLI	Kodak24	kodim19	240	0.708359	23.9985
BERNOULLI	Kodak24	kodim22	150	0.916399	31.1843
BERNOULLI	Kodak24	kodim22	160	0.906301	30.7303
BERNOULLI	Kodak24	kodim22	170	0.891264	30.2854
BERNOULLI	Kodak24	kodim22	180	0.874899	29.6777
BERNOULLI	Kodak24	kodim22	190	0.858304	29.2836
BERNOULLI	Kodak24	kodim22	200	0.83678	28.6706
BERNOULLI	Kodak24	kodim22	210	0.808507	28.0322
BERNOULLI	Kodak24	kodim22	220	0.776181	27.3622
BERNOULLI	Kodak24	kodim22	230	0.735687	26.5789
BERNOULLI	Kodak24	kodim22	240	0.67396	25.4995
BERNOULLI	Kodak24	kodim23	150	0.970119	33.5104
BERNOULLI	Kodak24	kodim23	160	0.966136	33.0588
BERNOULLI	Kodak24	kodim23	170	0.962592	32.8978
BERNOULLI	Kodak24	kodim23	180	0.957571	32.4126
BERNOULLI	Kodak24	kodim23	190	0.952379	32.0295
BERNOULLI	Kodak24	kodim23	200	0.945904	31.4926
BERNOULLI	Kodak24	kodim23	210	0.937428	30.8346
BERNOULLI	Kodak24	kodim23	220	0.926465	30.1931
BERNOULLI	Kodak24	kodim23	230	0.909663	29.188
BERNOULLI	Kodak24	kodim23	240	0.883134	28.0417
BERNOULLI	Kodak24	kodim09	150	0.954728	33.1777
BERNOULLI	Kodak24	kodim09	160	0.949469	32.675
BERNOULLI	Kodak24	kodim09	170	0.943926	32.2418
BERNOULLI	Kodak24	kodim09	180	0.935761	31.7174
BERNOULLI	Kodak24	kodim09	190	0.926847	31.1018
BERNOULLI	Kodak24	kodim09	200	0.91597	30.5584
BERNOULLI	Kodak24	kodim09	210	0.901681	29.9077
BERNOULLI	Kodak24	kodim09	220	0.884646	29.0896
BERNOULLI	Kodak24	kodim09	230	0.862993	28.0467
BERNOULLI	Kodak24	kodim09	240	0.822275	26.6962
BERNOULLI	Kodak24	kodim21	150	0.927643	29.4647
BERNOULLI	Kodak24	kodim21	160	0.917656	28.835
BERNOULLI	Kodak24	kodim21	170	0.905422	28.2638
BERNOULLI	Kodak24	kodim21	180	0.892538	27.6675
BERNOULLI	Kodak24	kodim21	190	0.876651	27.0195
BERNOULLI	Kodak24	kodim21	200	0.857973	26.4481
BERNOULLI	Kodak24	kodim21	210	0.837213	25.8383
BERNOULLI	Kodak24	kodim21	220	0.809167	25.0399
BERNOULLI	Kodak24	kodim21	230	0.772322	24.1914
BERNOULLI	Kodak24	kodim21	240	0.719501	23.0894
BERNOULLI	Kodak24	kodim20	150	0.944869	30.9441
BERNOULLI	Kodak24	kodim20	160	0.938857	30.6277
BERNOULLI	Kodak24	kodim20	170	0.930737	30.1227
BERNOULLI	Kodak24	kodim20	180	0.923409	29.6688
BERNOULLI	Kodak24	kodim20	190	0.912606	29.236
BERNOULLI	Kodak24	kodim20	200	0.901722	28.7606
BERNOULLI	Kodak24	kodim20	210	0.888308	28.131
BERNOULLI	Kodak24	kodim20	220	0.872345	27.6381
BERNOULLI	Kodak24	kodim20	230	0.849187	26.6394
BERNOULLI	Kodak24	kodim20	240	0.821926	25.9548
BERNOULLI	Kodak24	kodim08	150	0.918498	25.5236
BERNOULLI	Kodak24	kodim08	160	0.906454	25.0389
BERNOULLI	Kodak24	kodim08	170	0.892468	24.4349
BERNOULLI	Kodak24	kodim08	180	0.877312	24.0157
BERNOULLI	Kodak24	kodim08	190	0.857641	23.5074
BERNOULLI	Kodak24	kodim08	200	0.836109	23.0656
BERNOULLI	Kodak24	kodim08	210	0.806826	22.3619
BERNOULLI	Kodak24	kodim08	220	0.759997	21.3068
BERNOULLI	Kodak24	kodim08	230	0.70726	20.5119
BERNOULLI	Kodak24	kodim08	240	0.612137	19.1086
BERNOULLI	BSD68	65	150	0.855433	28.2373
BERNOULLI	BSD68	65	160	0.835628	27.5883
BERNOULLI	BSD68	65	170	0.814064	27.1669
BERNOULLI	BSD68	65	180	0.786577	26.4983
BERNOULLI	BSD68	65	190	0.758428	25.9864
BERNOULLI	BSD68	65	200	0.730309	25.4211
BERNOULLI	BSD68	65	210	0.688419	24.773
BERNOULLI	BSD68	65	220	0.646319	24.1219
BERNOULLI	BSD68	65	230	0.58713	23.2601
BERNOULLI	BSD68	65	240	0.5085	22.2032
BERNOULLI	BSD68	59	150	0.90895	33.8548
BERNOULLI	BSD68	59	160	0.898411	33.3439
BERNOULLI	BSD68	59	170	0.887465	32.9332
BERNOULLI	BSD68	59	180	0.874026	32.5094
BERNOULLI	BSD68	59	190	0.859387	32.0478
BERNOULLI	BSD68	59	200	0.844154	31.565
BERNOULLI	BSD68	59	210	0.823778	31.0493
BERNOULLI	BSD68	59	220	0.7976	30.4573
BERNOULLI	BSD68	59	230	0.769938	29.7611
BERNOULLI	BSD68	59	240	0.737386	29.0445
BERNOULLI	BSD68	58	150	0.889688	29.3506
BERNOULLI	BSD68	58	160	0.876414	28.833
BERNOULLI	BSD68	58	170	0.859799	28.4383
BERNOULLI	BSD68	58	180	0.845613	27.9377
BERNOULLI	BSD68	58	190	0.823955	27.3942
BERNOULLI	BSD68	58	200	0.796312	26.7893
BERNOULLI	BSD68	58	210	0.772003	26.31
BERNOULLI	BSD68	58	220	0.739107	25.7274
BERNOULLI	BSD68	58	230	0.702687	25.1258
BERNOULLI	BSD68	58	240	0.648144	24.1431
BERNOULLI	BSD68	64	150	0.907263	26.7783
BERNOULLI	BSD68	64	160	0.895327	26.3497
BERNOULLI	BSD68	64	170	0.876164	25.6262
BERNOULLI	BSD68	64	180	0.860798	25.2982
BERNOULLI	BSD68	64	190	0.83949	24.7161
BERNOULLI	BSD68	64	200	0.811533	24.0747
BERNOULLI	BSD68	64	210	0.772676	23.3376
BERNOULLI	BSD68	64	220	0.726035	22.5987
BERNOULLI	BSD68	64	230	0.658366	21.6258
BERNOULLI	BSD68	64	240	0.554126	20.4964
BERNOULLI	BSD68	66	150	0.924997	30.9278
BERNOULLI	BSD68	66	160	0.914968	30.3152
BERNOULLI	BSD68	66	170	0.902162	29.6164
BERNOULLI	BSD68	66	180	0.887145	28.944
BERNOULLI	BSD68	66	190	0.866323	28.2147
BERNOULLI	BSD68	66	200	0.847386	27.5383
BERNOULLI	BSD68	66	210	0.823102	26.9264
BERNOULLI	BSD68	66	220	0.79468	26.2645
BERNOULLI	BSD68	66	230	0.750648	24.9583
BERNOULLI	BSD68	66	240	0.695105	23.8108
BERNOULLI	BSD68	67	150	0.862709	24.3817
BERNOULLI	BSD68	67	160	0.84474	23.8375
BERNOULLI	BSD68	67	170	0.824014	23.2665
BERNOULLI	BSD68	67	180	0.803636	22.8507
BERNOULLI	BSD68	67	190	0.779989	22.3556
BERNOULLI	BSD68	67	200	0.751899	21.8638
BERNOULLI	BSD68	67	210	0.715326	21.2962
BERNOULLI	BSD68	67	220	0.679379	20.725
BERNOULLI	BSD68	67	230	0.629535	20.1096
BERNOULLI	BSD68	67	240	0.568624	19.2663
BERNOULLI	BSD68	63	150	0.979259	38.6756
BERNOULLI	BSD68	63	160	0.97678	38.2292
BERNOULLI	BSD68	63	170	0.973589	37.3658
BERNOULLI	BSD68	63	180	0.970316	36.7184
BERNOULLI	BSD68	63	190	0.966532	35.1191
BERNOULLI	BSD68	63	200	0.961277	33.5662
BERNOULLI	BSD68	63	210	0.953974	32.6247
BERNOULLI	BSD68	63	220	0.946297	30.8462
BERNOULLI	BSD68	63	230	0.927475	28.0683
BERNOULLI	BSD68	63	240	0.891536	24.3145
BERNOULLI	BSD68	62	150	0.907653	31.1344
BERNOULLI	BSD68	62	160	0.899972	30.8563
BERNOULLI	BSD68	62	170	0.886971	30.043
BERNOULLI	BSD68	62	180	0.870725	29.3843
BERNOULLI	BSD68	62	190	0.853348	28.839
BERNOULLI	BSD68	62	200	0.830235	28.1897
BERNOULLI	BSD68	62	210	0.811223	27.4434
BERNOULLI	BSD68	62	220	0.778543	26.8929
BERNOULLI	BSD68	62	230	0.747012	25.7145
BERNOULLI	BSD68	62	240	0.705279	24.9292
BERNOULLI	BSD68	48	150	0.875115	25.4572
BERNOULLI	BSD68	48	160	0.850585	24.7416
BERNOULLI	BSD68	48	170	0.834223	24.1396
BERNOULLI	BSD68	48	180	0.806037	23.4938
BERNOULLI	BSD68	48	190	0.778537	22.8632
BERNOULLI	BSD68	48	200	0.743523	22.1892
BERNOULLI	BSD68	48	210	0.700638	21.4777
BERNOULLI	BSD68	48	220	0.643765	20.7524
BERNOULLI	BSD68	48	230	0.577874	19.8379
BERNOULLI	BSD68	48	240	0.482057	18.8054
BERNOULLI	BSD68	60	150	0.905721	32.9186
BERNOULLI	BSD68	60	160	0.893562	32.3694
BERNOULLI	BSD68	60	170	0.8807	31.9639
BERNOULLI	BSD68	60	180	0.867177	31.5963
BERNOULLI	BSD68	60	190	0.849088	30.9029
BERNOULLI	BSD68	60	200	0.833724	30.5908
BERNOULLI	BSD68	60	210	0.810761	29.8123
BERNOULLI	BSD68	60	220	0.78604	29.2667
BERNOULLI	BSD68	60	230	0.756164	28.6757
BERNOULLI	BSD68	60	240	0.715105	27.3241
BERNOULLI	BSD68	61	150	0.913367	33.737
BERNOULLI	BSD68	61	160	0.901991	33.1543
BERNOULLI	BSD68	61	170	0.891656	32.6984
BERNOULLI	BSD68	61	180	0.879447	32.2263
BERNOULLI	BSD68	61	190	0.86603	31.7175
BERNOULLI	BSD68	61	200	0.848515	31.1135
BERNOULLI	BSD68	61	210	0.831749	30.5169
BERNOULLI	BSD68	61	220	0.810138	30.0705
BERNOULLI	BSD68	61	230	0.779987	29.2529
BERNOULLI	BSD68	61	240	0.745514	28.413
BERNOULLI	BSD68	49	150	0.890137	27.6432
BERNOULLI	BSD68	49	160	0.877292	27.1429
BERNOULLI	BSD68	49	170	0.855436	26.4608
BERNOULLI	BSD68	49	180	0.835605	25.9931
BERNOULLI	BSD68	49	190	0.807173	25.2891
BERNOULLI	BSD68	49	200	0.772946	24.6243
BERNOULLI	BSD68	49	210	0.737173	24.0132
BERNOULLI	BSD68	49	220	0.684639	23.2297
BERNOULLI	BSD68	49	230	0.622059	22.5375
BERNOULLI	BSD68	49	240	0.524662	21.5199
BERNOULLI	BSD68	6	150	0.969505	30.8676
BERNOULLI	BSD68	6	160	0.964405	30.4597
BERNOULLI	BSD68	6	170	0.958593	29.5409
BERNOULLI	BSD68	6	180	0.948557	28.6099
BERNOULLI	BSD68	6	190	0.937418	27.492
BERNOULLI	BSD68	6	200	0.926128	26.6595
BERNOULLI	BSD68	6	210	0.906527	25.5707
BERNOULLI	BSD68	6	220	0.87832	24.246
BERNOULLI	BSD68	6	230	0.83892	22.901
BERNOULLI	BSD68	6	240	0.779656	21.2084
BERNOULLI	BSD68	12	150	0.909309	28.6933
BERNOULLI	BSD68	12	160	0.894778	28.0823
BERNOULLI	BSD68	12	170	0.879644	27.4476
BERNOULLI	BSD68	12	180	0.861549	26.9807
BERNOULLI	BSD68	12	190	0.841015	26.3785
BERNOULLI	BSD68	12	200	0.814748	25.7632
BERNOULLI	BSD68	12	210	0.779282	25.1237
BERNOULLI	BSD68	12	220	0.743278	24.3456
BERNOULLI	BSD68	12	230	0.69201	23.6384
BERNOULLI	BSD68	12	240	0.622047	22.5595
BERNOULLI	BSD68	13	150	0.965171	36.2361
BERNOULLI	BSD68	13	160	0.959601	35.965
BERNOULLI	BSD68	13	170	0.956238	35.8776
BERNOULLI	BSD68	13	180	0.947773	34.9103
BERNOULLI	BSD68	13	190	0.942777	34.5384
BERNOULLI	BSD68	13	200	0.933872	33.7757
BERNOULLI	BSD68	13	210	0.922892	33.4672
BERNOULLI	BSD68	13	220	0.90998	32.5392
BERNOULLI	BSD68	13	230	0.887097	31.0108
BERNOULLI	BSD68	13	240	0.858525	29.3929
BERNOULLI	BSD68	7	150	0.880092	24.0298
BERNOULLI	BSD68	7	160	0.860449	23.3707
BERNOULLI	BSD68	7	170	0.839001	22.7188
BERNOULLI	BSD68	7	180	0.814246	22.1414
BERNOULLI	BSD68	7	190	0.782013	21.4334
BERNOULLI	BSD68	7	200	0.745369	20.7158
BERNOULLI	BSD68	7	210	0.702991	20.0364
BERNOULLI	BSD68	7	220	0.651878	19.3111
BERNOULLI	BSD68	7	230	0.576817	18.3647
BERNOULLI	BSD68	7	240	0.474271	17.314
BERNOULLI	BSD68	11	150	0.967322	35.1811
BERNOULLI	BSD68	11	160	0.96083	34.2301
BERNOULLI	BSD68	11	170	0.953025	33.46
BERNOULLI	BSD68	11	180	0.946363	32.915
BERNOULLI	BSD68	11	190	0.93467	32.1404
BERNOULLI	BSD68	11	200	0.918063	31.2477
BERNOULLI	BSD68	11	210	0.901261	30.2639
BERNOULLI	BSD68	11	220	0.873869	29.2687
BERNOULLI	BSD68	11	230	0.839341	28.2997
BERNOULLI	BSD68	11	240	0.777492	26.9785
BERNOULLI	BSD68	5	150	0.903379	29.9826
BERNOULLI	BSD68	5	160	0.891102	29.3411
BERNOULLI	BSD68	5	170	0.879727	28.8703
BERNOULLI	BSD68	5	180	0.862308	27.9786
BERNOULLI	BSD68	5	190	0.845416	27.2397
BERNOULLI	BSD68	5	200	0.826889	26.5883
BERNOULLI	BSD68	5	210	0.799972	25.6581
BERNOULLI	BSD68	5	220	0.770778	24.9733
BERNOULLI	BSD68	5	230	0.727373	23.8355
BERNOULLI	BSD68	5	240	0.667184	22.7017
BERNOULLI	BSD68	39	150	0.753185	29.1109
BERNOULLI	BSD68	39	160	0.725332	28.7102
BERNOULLI	BSD68	39	170	0.698159	28.3144
BERNOULLI	BSD68	39	180	0.666376	28.0173
BERNOULLI	BSD68	39	190	0.63456	27.625
BERNOULLI	BSD68	39	200	0.604006	27.3382
BERNOULLI	BSD68	39	210	0.565413	26.9453
BERNOULLI	BSD68	39	220	0.525609	26.7218
BERNOULLI	BSD68	39	230	0.478428	26.2025
BERNOULLI	BSD68	39	240	0.433871	25.7717
BERNOULLI	BSD68	38	150	0.953096	38.4734
BERNOULLI	BSD68	38	160	0.947731	37.9054
BERNOULLI	BSD68	38	170	0.942925	37.4512
BERNOULLI	BSD68	38	180	0.935638	36.508
BERNOULLI	BSD68	38	190	0.928647	35.9918
BERNOULLI	BSD68	38	200	0.919832	34.8972
BERNOULLI	BSD68	38	210	0.908772	34.369
BERNOULLI	BSD68	38	220	0.896631	33.3545
BERNOULLI	BSD68	38	230	0.87848	32.1223
BERNOULLI	BSD68	38	240	0.848245	29.6411
BERNOULLI	BSD68	4	150	0.906939	29.3952
BERNOULLI	BSD68	4	160	0.893479	28.5421
BERNOULLI	BSD68	4	170	0.87636	28.0174
BERNOULLI	BSD68	4	180	0.860144	27.3521
BERNOULLI	BSD68	4	190	0.838272	26.716
BERNOULLI	BSD68	4	200	0.815691	26.0386
BERNOULLI	BSD68	4	210	0.788084	25.3526
BERNOULLI	BSD68	4	220	0.75251	24.582
BERNOULLI	BSD68	4	230	0.701053	23.4939
BERNOULLI	BSD68	4	240	0.641869	22.3141
BERNOULLI	BSD68	10	150	0.934261	29.9125
BERNOULLI	BSD68	10	160	0.925128	29.0747
BERNOULLI	BSD68	10	170	0.915112	28.4918
BERNOULLI	BSD68	10	180	0.905127	27.8948
BERNOULLI	BSD68	10	190	0.890834	27.092
BERNOULLI	BSD68	10	200	0.874786	26.3905
BERNOULLI	BSD68	10	210	0.858552	25.6825
BERNOULLI	BSD68	10	220	0.832485	24.6846
BERNOULLI	BSD68	10	230	0.800781	23.9626
BERNOULLI	BSD68	10	240	0.756088	22.6916
BERNOULLI	BSD68	28	150	0.948346	28.931
BERNOULLI	BSD68	28	160	0.941768	28.4825
BERNOULLI	BSD68	28	170	0.93265	27.9561
BERNOULLI	BSD68	28	180	0.91715	27.2995
BERNOULLI	BSD68	28	190	0.904332	26.7014
BERNOULLI	BSD68	28	200	0.887537	26.1202
BERNOULLI	BSD68	28	210	0.862152	25.1126
BERNOULLI	BSD68	28	220	0.829937	24.549
BERNOULLI	BSD68	28	230	0.776393	23.4347
BERNOULLI	BSD68	28	240	0.70399	22.1794
BERNOULLI	BSD68	14	150	0.947056	30.7903
BERNOULLI	BSD68	14	160	0.936942	29.9421
BERNOULLI	BSD68	14	170	0.925976	29.1875
BERNOULLI	BSD68	14	180	0.910891	28.3997
BERNOULLI	BSD68	14	190	0.893465	27.6672
BERNOULLI	BSD68	14	200	0.87032	26.5909
BERNOULLI	BSD68	14	210	0.839989	25.8538
BERNOULLI	BSD68	14	220	0.801474	24.8384
BERNOULLI	BSD68	14	230	0.742822	23.6098
BERNOULLI	BSD68	14	240	0.653547	22.252
BERNOULLI	BSD68	0	150	0.98842	43.2171
BERNOULLI	BSD68	0	160	0.987237	42.2616
BERNOULLI	BSD68	0	170	0.986329	41.7975
BERNOULLI	BSD68	0	180	0.98466	40.462
BERNOULLI	BSD68	0	190	0.982471	39.1443
BERNOULLI	BSD68	0	200	0.980372	38.612
BERNOULLI	BSD68	0	210	0.977693	37.812
BERNOULLI	BSD68	0	220	0.974129	36.4509
BERNOULLI	BSD68	0	230	0.968232	34.7779
BERNOULLI	BSD68	0	240	0.959178	32.9131
BERNOULLI	BSD68	1	150	0.92996	31.912
BERNOULLI	BSD68	1	160	0.918297	31.2369
BERNOULLI	BSD68	1	170	0.900564	30.2027
BERNOULLI	BSD68	1	180	0.887042	29.606
BERNOULLI	BSD68	1	190	0.864222	28.7827
BERNOULLI	BSD68	1	200	0.83324	27.6325
BERNOULLI	BSD68	1	210	0.799041	26.7638
BERNOULLI	BSD68	1	220	0.753698	25.7011
BERNOULLI	BSD68	1	230	0.677893	24.4673
BERNOULLI	BSD68	1	240	0.57243	23.0147
BERNOULLI	BSD68	15	150	0.875734	25.3529
BERNOULLI	BSD68	15	160	0.854864	24.723
BERNOULLI	BSD68	15	170	0.83115	24.1614
BERNOULLI	BSD68	15	180	0.801804	23.5328
BERNOULLI	BSD68	15	190	0.772158	23.0262
BERNOULLI	BSD68	15	200	0.733716	22.3633
BERNOULLI	BSD68	15	210	0.688694	21.8323
BERNOULLI	BSD68	15	220	0.627563	21.1274
BERNOULLI	BSD68	15	230	0.560974	20.501
BERNOULLI	BSD68	15	240	0.470478	19.7667
BERNOULLI	BSD68	29	150	0.953845	31.2155
BERNOULLI	BSD68	29	160	0.944773	30.3228
BERNOULLI	BSD68	29	170	0.935524	29.5717
BERNOULLI	BSD68	29	180	0.924185	28.8583
BERNOULLI	BSD68	29	190	0.908899	27.9444
BERNOULLI	BSD68	29	200	0.89082	27.1434
BERNOULLI	BSD68	29	210	0.865569	26.2229
BERNOULLI	BSD68	29	220	0.82432	24.8148
BERNOULLI	BSD68	29	230	0.775926	23.5602
BERNOULLI	BSD68	29	240	0.700968	22.1092
BERNOULLI	BSD68	3	150	0.920331	31.0133
BERNOULLI	BSD68	3	160	0.905494	30.2136
BERNOULLI	BSD68	3	170	0.894233	29.7082
BERNOULLI	BSD68	3	180	0.879324	29.1062
BERNOULLI	BSD68	3	190	0.856193	28.2233
BERNOULLI	BSD68	3	200	0.838412	27.681
BERNOULLI	BSD68	3	210	0.813094	26.9453
BERNOULLI	BSD68	3	220	0.775405	26.0089
BERNOULLI	BSD68	3	230	0.728402	24.9536
BERNOULLI	BSD68	3	240	0.659635	23.6348
BERNOULLI	BSD68	17	150	0.938909	32.4104
BERNOULLI	BSD68	17	160	0.928776	31.6005
BERNOULLI	BSD68	17	170	0.918288	30.9248
BERNOULLI	BSD68	17	180	0.905203	30.2957
BERNOULLI	BSD68	17	190	0.88867	29.8183
BERNOULLI	BSD68	17	200	0.871227	29.0301
BERNOULLI	BSD68	17	210	0.8498	28.4192
BERNOULLI	BSD68	17	220	0.816272	27.5481
BERNOULLI	BSD68	17	230	0.776554	26.5645
BERNOULLI	BSD68	17	240	0.717501	25.4124
BERNOULLI	BSD68	16	150	0.936448	30.7276
BERNOULLI	BSD68	16	160	0.925736	29.9169
BERNOULLI	BSD68	16	170	0.91681	29.4628
BERNOULLI	BSD68	16	180	0.903057	28.8228
BERNOULLI	BSD68	16	190	0.887598	27.93
BERNOULLI	BSD68	16	200	0.867888	27.2737
BERNOULLI	BSD68	16	210	0.840204	26.0984
BERNOULLI	BSD68	16	220	0.809818	25.4417
BERNOULLI	BSD68	16	230	0.774754	24.7466
BERNOULLI	BSD68	16	240	0.699066	22.9045
BERNOULLI	BSD68	2	150	0.959748	37.4579
BERNOULLI	BSD68	2	160	0.952192	36.5597
BERNOULLI	BSD68	2	170	0.947005	35.9525
BERNOULLI	BSD68	2	180	0.940697	35.5887
BERNOULLI	BSD68	2	190	0.931824	34.7851
BERNOULLI	BSD68	2	200	0.92166	34.2563
BERNOULLI	BSD68	2	210	0.909026	33.3267
BERNOULLI	BSD68	2	220	0.892759	32.485
BERNOULLI	BSD68	2	230	0.874315	31.6336
BERNOULLI	BSD68	2	240	0.839837	30.0486
BERNOULLI	BSD68	27	150	0.906401	28.1724
BERNOULLI	BSD68	27	160	0.891319	27.3773
BERNOULLI	BSD68	27	170	0.870466	26.5831
BERNOULLI	BSD68	27	180	0.851899	25.9603
BERNOULLI	BSD68	27	190	0.825228	25.161
BERNOULLI	BSD68	27	200	0.79572	24.3319
BERNOULLI	BSD68	27	210	0.760129	23.6137
BERNOULLI	BSD68	27	220	0.708881	22.6289
BERNOULLI	BSD68	27	230	0.646421	21.6447
BERNOULLI	BSD68	27	240	0.551559	20.2614
BERNOULLI	BSD68	33	150	0.810792	21.5406
BERNOULLI	BSD68	33	160	0.785066	21.0313
BERNOULLI	BSD68	33	170	0.757279	20.5209
BERNOULLI	BSD68	33	180	0.728489	20.0535
BERNOULLI	BSD68	33	190	0.695025	19.5593
BERNOULLI	BSD68	33	200	0.655205	19.0653
BERNOULLI	BSD68	33	210	0.603809	18.5246
BERNOULLI	BSD68	33	220	0.55855	18.0097
BERNOULLI	BSD68	33	230	0.49297	17.3727
BERNOULLI	BSD68	33	240	0.42231	16.751
BERNOULLI	BSD68	32	150	0.937945	29.5111
BERNOULLI	BSD68	32	160	0.932322	29.5816
BERNOULLI	BSD68	32	170	0.922606	28.9402
BERNOULLI	BSD68	32	180	0.912861	27.954
BERNOULLI	BSD68	32	190	0.903942	27.8864
BERNOULLI	BSD68	32	200	0.890658	27.093
BERNOULLI	BSD68	32	210	0.875881	27.0132
BERNOULLI	BSD68	32	220	0.85835	26.1635
BERNOULLI	BSD68	32	230	0.839399	25.6311
BERNOULLI	BSD68	32	240	0.819979	25.8227
BERNOULLI	BSD68	26	150	0.902495	24.9454
BERNOULLI	BSD68	26	160	0.886075	24.2806
BERNOULLI	BSD68	26	170	0.867496	23.6408
BERNOULLI	BSD68	26	180	0.846283	22.9909
BERNOULLI	BSD68	26	190	0.824259	22.3937
BERNOULLI	BSD68	26	200	0.786252	21.5689
BERNOULLI	BSD68	26	210	0.748518	20.9495
BERNOULLI	BSD68	26	220	0.703034	20.2116
BERNOULLI	BSD68	26	230	0.633514	19.2182
BERNOULLI	BSD68	26	240	0.535411	18.0799
BERNOULLI	BSD68	30	150	0.953161	30.3663
BERNOULLI	BSD68	30	160	0.946447	29.6127
BERNOULLI	BSD68	30	170	0.936347	28.7688
BERNOULLI	BSD68	30	180	0.929639	28.3002
BERNOULLI	BSD68	30	190	0.917178	27.5641
BERNOULLI	BSD68	30	200	0.899308	26.5748
BERNOULLI	BSD68	30	210	0.883259	25.917
BERNOULLI	BSD68	30	220	0.858509	24.9524
BERNOULLI	BSD68	30	230	0.826893	23.9736
BERNOULLI	BSD68	30	240	0.781216	22.6537
BERNOULLI	BSD68	24	150	0.892307	28.0233
BERNOULLI	BSD68	24	160	0.875457	27.3507
BERNOULLI	BSD68	24	170	0.859787	26.8201
BERNOULLI	BSD68	24	180	0.845266	26.3996
BERNOULLI	BSD68	24	190	0.827393	25.9655
BERNOULLI	BSD68	24	200	0.806357	25.4576
BERNOULLI	BSD68	24	210	0.774955	24.6932
BERNOULLI	BSD68	24	220	0.748319	24.0907
BERNOULLI	BSD68	24	230	0.706723	23.2195
BERNOULLI	BSD68	24	240	0.649574	21.9038
BERNOULLI	BSD68	18	150	0.935815	27.1022
BERNOULLI	BSD68	18	160	0.9289	27.2598
BERNOULLI	BSD68	18	170	0.917873	26.2365
BERNOULLI	BSD68	18	180	0.905912	26.1302
BERNOULLI	BSD68	18	190	0.89289	25.4498
BERNOULLI	BSD68	18	200	0.876316	25.2148
BERNOULLI	BSD68	18	210	0.852514	24.3059
BERNOULLI	BSD68	18	220	0.824241	23.7722
BERNOULLI	BSD68	18	230	0.7728	22.6312
BERNOULLI	BSD68	18	240	0.702364	21.3484
BERNOULLI	BSD68	19	150	0.955765	33.9949
BERNOULLI	BSD68	19	160	0.94868	33.4606
BERNOULLI	BSD68	19	170	0.938765	32.7274
BERNOULLI	BSD68	19	180	0.926539	31.9264
BERNOULLI	BSD68	19	190	0.911727	31.1718
BERNOULLI	BSD68	19	200	0.89011	30.1699
BERNOULLI	BSD68	19	210	0.868214	29.4349
BERNOULLI	BSD68	19	220	0.835668	28.4631
BERNOULLI	BSD68	19	230	0.786207	27.2844
BERNOULLI	BSD68	19	240	0.712495	25.995
BERNOULLI	BSD68	25	150	0.905433	27.4506
BERNOULLI	BSD68	25	160	0.893655	26.9657
BERNOULLI	BSD68	25	170	0.88078	26.2878
BERNOULLI	BSD68	25	180	0.868405	26.0047
BERNOULLI	BSD68	25	190	0.853801	25.4836
BERNOULLI	BSD68	25	200	0.833549	24.7501
BERNOULLI	BSD68	25	210	0.813641	24.1138
BERNOULLI	BSD68	25	220	0.788118	23.2879
BERNOULLI	BSD68	25	230	0.760944	22.6714
BERNOULLI	BSD68	25	240	0.718197	21.3642
BERNOULLI	BSD68	31	150	0.949314	34.0817
BERNOULLI	BSD68	31	160	0.940796	33.2698
BERNOULLI	BSD68	31	170	0.93038	32.5074
BERNOULLI	BSD68	31	180	0.920093	31.8731
BERNOULLI	BSD68	31	190	0.903486	30.9694
BERNOULLI	BSD68	31	200	0.88948	30.2688
BERNOULLI	BSD68	31	210	0.862385	29.3056
BERNOULLI	BSD68	31	220	0.836709	28.4417
BERNOULLI	BSD68	31	230	0.787372	27.0592
BERNOULLI	BSD68	31	240	0.726028	25.8412
BERNOULLI	BSD68	9	150	0.939576	30.6553
BERNOULLI	BSD68	9	160	0.931765	30.0721
BERNOULLI	BSD68	9	170	0.92385	29.9777
BERNOULLI	BSD68	9	180	0.909165	28.8527
BERNOULLI	BSD68	9	190	0.895759	28.3921
BERNOULLI	BSD68	9	200	0.879569	27.7128
BERNOULLI	BSD68	9	210	0.859414	27.142
BERNOULLI	BSD68	9	220	0.827933	26.3218
BERNOULLI	BSD68	9	230	0.7964	25.639
BERNOULLI	BSD68	9	240	0.752395	24.3736
BERNOULLI	BSD68	35	150	0.839769	23.976
BERNOULLI	BSD68	35	160	0.815162	23.3989
BERNOULLI	BSD68	35	170	0.787034	22.811
BERNOULLI	BSD68	35	180	0.746614	22.1013
BERNOULLI	BSD68	35	190	0.706486	21.5338
BERNOULLI	BSD68	35	200	0.657667	20.8806
BERNOULLI	BSD68	35	210	0.593775	20.2208
BERNOULLI	BSD68	35	220	0.531024	19.6592
BERNOULLI	BSD68	35	230	0.442462	19.016
BERNOULLI	BSD68	35	240	0.325263	18.2268
BERNOULLI	BSD68	21	150	0.897331	27.7089
BERNOULLI	BSD68	21	160	0.877446	26.9115
BERNOULLI	BSD68	21	170	0.857387	26.2777
BERNOULLI	BSD68	21	180	0.837465	25.7994
BERNOULLI	BSD68	21	190	0.811955	25.1441
BERNOULLI	BSD68	21	200	0.781918	24.4692
BERNOULLI	BSD68	21	210	0.742396	23.7075
BERNOULLI	BSD68	21	220	0.702048	23.1729
BERNOULLI	BSD68	21	230	0.652274	22.4761
BERNOULLI	BSD68	21	240	0.57799	21.5696
BERNOULLI	BSD68	20	150	0.938968	32.8668
BERNOULLI	BSD68	20	160	0.931127	32.2617
BERNOULLI	BSD68	20	170	0.921828	31.5789
BERNOULLI	BSD68	20	180	0.909065	30.6613
BERNOULLI	BSD68	20	190	0.894144	30.0721
BERNOULLI	BSD68	20	200	0.88095	29.4082
BERNOULLI	BSD68	20	210	0.862321	28.6728
BERNOULLI	BSD68	20	220	0.837732	27.8687
BERNOULLI	BSD68	20	230	0.798367	26.481
BERNOULLI	BSD68	20	240	0.753214	25.0563
BERNOULLI	BSD68	34	150	0.95317	33.8458
BERNOULLI	BSD68	34	160	0.944801	33.1358
BERNOULLI	BSD68	34	170	0.935833	32.3796
BERNOULLI	BSD68	34	180	0.922373	31.3876
BERNOULLI	BSD68	34	190	0.907707	30.6447
BERNOULLI	BSD68	34	200	0.89263	29.9673
BERNOULLI	BSD68	34	210	0.86728	28.8185
BERNOULLI	BSD68	34	220	0.837266	28.1262
BERNOULLI	BSD68	34	230	0.788946	26.7532
BERNOULLI	BSD68	34	240	0.711158	25.6135
BERNOULLI	BSD68	8	150	0.827634	25.6315
BERNOULLI	BSD68	8	160	0.805136	25.2285
BERNOULLI	BSD68	8	170	0.783115	24.7003
BERNOULLI	BSD68	8	180	0.758223	24.2921
BERNOULLI	BSD68	8	190	0.729879	23.7966
BERNOULLI	BSD68	8	200	0.69633	23.2409
BERNOULLI	BSD68	8	210	0.658573	22.7245
BERNOULLI	BSD68	8	220	0.608808	22.2068
BERNOULLI	BSD68	8	230	0.554015	21.5598
BERNOULLI	BSD68	8	240	0.480421	20.8162
BERNOULLI	BSD68	22	150	0.947332	30.2069
BERNOULLI	BSD68	22	160	0.935649	29.1932
BERNOULLI	BSD68	22	170	0.9245	28.5038
BERNOULLI	BSD68	22	180	0.906309	27.295
BERNOULLI	BSD68	22	190	0.887942	26.2505
BERNOULLI	BSD68	22	200	0.862971	25.1027
BERNOULLI	BSD68	22	210	0.824323	23.7726
BERNOULLI	BSD68	22	220	0.774089	22.5003
BERNOULLI	BSD68	22	230	0.698188	20.9335
BERNOULLI	BSD68	22	240	0.597742	19.2949
BERNOULLI	BSD68	36	150	0.916939	28.6692
BERNOULLI	BSD68	36	160	0.903165	27.9918
BERNOULLI	BSD68	36	170	0.886433	27.3201
BERNOULLI	BSD68	36	180	0.864364	26.5835
BERNOULLI	BSD68	36	190	0.841226	25.7935
BERNOULLI	BSD68	36	200	0.810108	25.0573
BERNOULLI	BSD68	36	210	0.766403	24.185
BERNOULLI	BSD68	36	220	0.717367	23.3544
BERNOULLI	BSD68	36	230	0.644857	22.38
BERNOULLI	BSD68	36	240	0.525983	20.9652
BERNOULLI	BSD68	37	150	0.923035	27.1663
BERNOULLI	BSD68	37	160	0.913448	26.7193
BERNOULLI	BSD68	37	170	0.900315	26.1198
BERNOULLI	BSD68	37	180	0.889785	25.7226
BERNOULLI	BSD68	37	190	0.871816	25.0312
BERNOULLI	BSD68	37	200	0.857493	24.621
BERNOULLI	BSD68	37	210	0.832007	23.8892
BERNOULLI	BSD68	37	220	0.808752	23.3669
BERNOULLI	BSD68	37	230	0.770513	22.5569
BERNOULLI	BSD68	37	240	0.717716	21.5198
BERNOULLI	BSD68	23	150	0.968913	36.6211
BERNOULLI	BSD68	23	160	0.965399	36.0364
BERNOULLI	BSD68	23	170	0.959627	35.4019
BERNOULLI	BSD68	23	180	0.954747	34.7717
BERNOULLI	BSD68	23	190	0.947359	34.2013
BERNOULLI	BSD68	23	200	0.939166	33.3716
BERNOULLI	BSD68	23	210	0.928458	32.6978
BERNOULLI	BSD68	23	220	0.916996	32.0503
BERNOULLI	BSD68	23	230	0.896212	30.877
BERNOULLI	BSD68	23	240	0.8657	29.5802
BERNOULLI	BSD68	44	150	0.92227	29.9065
BERNOULLI	BSD68	44	160	0.911117	29.2549
BERNOULLI	BSD68	44	170	0.899146	28.6802
BERNOULLI	BSD68	44	180	0.880806	27.7922
BERNOULLI	BSD68	44	190	0.865359	27.2709
BERNOULLI	BSD68	44	200	0.842497	26.5021
BERNOULLI	BSD68	44	210	0.817574	25.5065
BERNOULLI	BSD68	44	220	0.787835	24.8639
BERNOULLI	BSD68	44	230	0.743554	23.9691
BERNOULLI	BSD68	44	240	0.684663	22.5277
BERNOULLI	BSD68	50	150	0.926571	34.3127
BERNOULLI	BSD68	50	160	0.916868	33.6854
BERNOULLI	BSD68	50	170	0.906879	33.1174
BERNOULLI	BSD68	50	180	0.894382	32.641
BERNOULLI	BSD68	50	190	0.883101	32.1163
BERNOULLI	BSD68	50	200	0.868652	31.686
BERNOULLI	BSD68	50	210	0.849795	30.7922
BERNOULLI	BSD68	50	220	0.831923	30.3158
BERNOULLI	BSD68	50	230	0.801363	29.0887
BERNOULLI	BSD68	50	240	0.770717	28.2504
BERNOULLI	BSD68	51	150	0.881592	27.7702
BERNOULLI	BSD68	51	160	0.863975	27.178
BERNOULLI	BSD68	51	170	0.844569	26.592
BERNOULLI	BSD68	51	180	0.824038	26.0356
BERNOULLI	BSD68	51	190	0.79675	25.476
BERNOULLI	BSD68	51	200	0.770477	24.9999
BERNOULLI	BSD68	51	210	0.7344	24.3864
BERNOULLI	BSD68	51	220	0.697938	23.7806
BERNOULLI	BSD68	51	230	0.64206	23
BERNOULLI	BSD68	51	240	0.568431	22.0124
BERNOULLI	BSD68	45	150	0.970444	32.4829
BERNOULLI	BSD68	45	160	0.963899	31.2255
BERNOULLI	BSD68	45	170	0.959631	30.6987
BERNOULLI	BSD68	45	180	0.951112	29.4301
BERNOULLI	BSD68	45	190	0.941873	28.8648
BERNOULLI	BSD68	45	200	0.927357	27.7255
BERNOULLI	BSD68	45	210	0.909952	26.5111
BERNOULLI	BSD68	45	220	0.889123	25.7522
BERNOULLI	BSD68	45	230	0.854059	24.3924
BERNOULLI	BSD68	45	240	0.7883	22.3051
BERNOULLI	BSD68	53	150	0.935228	35.2696
BERNOULLI	BSD68	53	160	0.926971	34.8412
BERNOULLI	BSD68	53	170	0.918212	34.1707
BERNOULLI	BSD68	53	180	0.908514	33.707
BERNOULLI	BSD68	53	190	0.897317	33.0976
BERNOULLI	BSD68	53	200	0.886214	32.5636
BERNOULLI	BSD68	53	210	0.87204	31.9626
BERNOULLI	BSD68	53	220	0.855961	31.2942
BERNOULLI	BSD68	53	230	0.830508	30.1869
BERNOULLI	BSD68	53	240	0.794478	29.014
BERNOULLI	BSD68	47	150	0.964494	39.053
BERNOULLI	BSD68	47	160	0.960265	38.6788
BERNOULLI	BSD68	47	170	0.954807	38.1435
BERNOULLI	BSD68	47	180	0.947818	37.4422
BERNOULLI	BSD68	47	190	0.940121	36.8184
BERNOULLI	BSD68	47	200	0.931148	36.0878
BERNOULLI	BSD68	47	210	0.916021	35.2691
BERNOULLI	BSD68	47	220	0.901468	34.425
BERNOULLI	BSD68	47	230	0.879958	33.4608
BERNOULLI	BSD68	47	240	0.839563	31.8092
BERNOULLI	BSD68	46	150	0.928323	28.6336
BERNOULLI	BSD68	46	160	0.914474	27.8841
BERNOULLI	BSD68	46	170	0.898134	27.349
BERNOULLI	BSD68	46	180	0.879687	26.6726
BERNOULLI	BSD68	46	190	0.857785	25.94
BERNOULLI	BSD68	46	200	0.821696	24.8452
BERNOULLI	BSD68	46	210	0.784284	24.1618
BERNOULLI	BSD68	46	220	0.730277	23.2735
BERNOULLI	BSD68	46	230	0.668171	22.4614
BERNOULLI	BSD68	46	240	0.593973	21.7031
BERNOULLI	BSD68	52	150	0.911326	27.1372
BERNOULLI	BSD68	52	160	0.89862	26.795
BERNOULLI	BSD68	52	170	0.883979	26.1673
BERNOULLI	BSD68	52	180	0.866496	25.5901
BERNOULLI	BSD68	52	190	0.847349	24.7278
BERNOULLI	BSD68	52	200	0.820288	24.0647
BERNOULLI	BSD68	52	210	0.78983	23.2066
BERNOULLI	BSD68	52	220	0.751128	22.0511
BERNOULLI	BSD68	52	230	0.699175	20.6253
BERNOULLI	BSD68	52	240	0.624564	19.3187
BERNOULLI	BSD68	56	150	0.903368	28.5062
BERNOULLI	BSD68	56	160	0.888237	27.731
BERNOULLI	BSD68	56	170	0.870202	27.1729
BERNOULLI	BSD68	56	180	0.849883	26.3687
BERNOULLI	BSD68	56	190	0.823341	25.4813
BERNOULLI	BSD68	56	200	0.793977	24.9364
BERNOULLI	BSD68	56	210	0.758283	24.2389
BERNOULLI	BSD68	56	220	0.709411	23.1368
BERNOULLI	BSD68	56	230	0.648966	22.3583
BERNOULLI	BSD68	56	240	0.568821	21.0187
BERNOULLI	BSD68	42	150	0.988487	41.6002
BERNOULLI	BSD68	42	160	0.987137	41.2951
BERNOULLI	BSD68	42	170	0.985387	40.6186
BERNOULLI	BSD68	42	180	0.983263	39.2275
BERNOULLI	BSD68	42	190	0.979496	37.5649
BERNOULLI	BSD68	42	200	0.97634	36.7756
BERNOULLI	BSD68	42	210	0.969468	35.1637
BERNOULLI	BSD68	42	220	0.960681	33.6068
BERNOULLI	BSD68	42	230	0.937193	30.539
BERNOULLI	BSD68	42	240	0.894734	27.5373
BERNOULLI	BSD68	43	150	0.895784	28.1116
BERNOULLI	BSD68	43	160	0.884898	27.7014
BERNOULLI	BSD68	43	170	0.868702	27.0826
BERNOULLI	BSD68	43	180	0.850217	26.3655
BERNOULLI	BSD68	43	190	0.827391	25.7532
BERNOULLI	BSD68	43	200	0.800119	24.9934
BERNOULLI	BSD68	43	210	0.767569	24.2125
BERNOULLI	BSD68	43	220	0.731836	23.526
BERNOULLI	BSD68	43	230	0.689818	22.7403
BERNOULLI	BSD68	43	240	0.625259	21.6286
BERNOULLI	BSD68	57	150	0.775828	22.8281
BERNOULLI	BSD68	57	160	0.745949	22.3781
BERNOULLI	BSD68	57	170	0.713117	21.8379
BERNOULLI	BSD68	57	180	0.673112	21.3842
BERNOULLI	BSD68	57	190	0.632735	20.9432
BERNOULLI	BSD68	57	200	0.593224	20.5488
BERNOULLI	BSD68	57	210	0.540823	20.0432
BERNOULLI	BSD68	57	220	0.484257	19.6004
BERNOULLI	BSD68	57	230	0.415827	19.0583
BERNOULLI	BSD68	57	240	0.330499	18.38
BERNOULLI	BSD68	41	150	0.945683	33.2069
BERNOULLI	BSD68	41	160	0.935444	32.3706
BERNOULLI	BSD68	41	170	0.923903	31.6641
BERNOULLI	BSD68	41	180	0.907813	30.7842
BERNOULLI	BSD68	41	190	0.88839	29.9967
BERNOULLI	BSD68	41	200	0.864955	29.037
BERNOULLI	BSD68	41	210	0.828912	28.0045
BERNOULLI	BSD68	41	220	0.776888	26.8389
BERNOULLI	BSD68	41	230	0.714903	25.8492
BERNOULLI	BSD68	41	240	0.626024	24.4286
BERNOULLI	BSD68	55	150	0.943183	32.1751
BERNOULLI	BSD68	55	160	0.933092	31.3882
BERNOULLI	BSD68	55	170	0.919933	30.5802
BERNOULLI	BSD68	55	180	0.907148	29.9874
BERNOULLI	BSD68	55	190	0.888312	28.7493
BERNOULLI	BSD68	55	200	0.866715	27.9347
BERNOULLI	BSD68	55	210	0.839128	26.9597
BERNOULLI	BSD68	55	220	0.803126	25.8588
BERNOULLI	BSD68	55	230	0.752602	24.595
BERNOULLI	BSD68	55	240	0.671548	23.0332
BERNOULLI	BSD68	54	150	0.916395	34.8861
BERNOULLI	BSD68	54	160	0.905627	34.3752
BERNOULLI	BSD68	54	170	0.894603	33.8954
BERNOULLI	BSD68	54	180	0.882134	33.4058
BERNOULLI	BSD68	54	190	0.864291	32.7707
BERNOULLI	BSD68	54	200	0.84747	32.2349
BERNOULLI	BSD68	54	210	0.827741	31.731
BERNOULLI	BSD68	54	220	0.798296	30.9614
BERNOULLI	BSD68	54	230	0.764322	30.0674
BERNOULLI	BSD68	54	240	0.718374	29.249
BERNOULLI	BSD68	40	150	0.8905	30.1467
BERNOULLI	BSD68	40	160	0.875925	29.6584
BERNOULLI	BSD68	40	170	0.860411	29.0933
BERNOULLI	BSD68	40	180	0.841598	28.5952
BERNOULLI	BSD68	40	190	0.822184	27.9881
BERNOULLI	BSD68	40	200	0.798972	27.4933
BERNOULLI	BSD68	40	210	0.772671	26.9192
BERNOULLI	BSD68	40	220	0.743859	26.2156
BERNOULLI	BSD68	40	230	0.701868	25.3707
BERNOULLI	BSD68	40	240	0.645524	24.2057
BERNOULLI	Set12	1	150	0.927612	29.6559
BERNOULLI	Set12	1	160	0.91952	28.6399
BERNOULLI	Set12	1	170	0.910489	28.0776
BERNOULLI	Set12	1	180	0.898362	27.7032
BERNOULLI	Set12	1	190	0.888999	27.0701
BERNOULLI	Set12	1	200	0.874047	26.2327
BERNOULLI	Set12	1	210	0.850859	25.0748
BERNOULLI	Set12	1	220	0.827367	24.1738
BERNOULLI	Set12	1	230	0.795188	23.0189
BERNOULLI	Set12	1	240	0.742248	21.5698
BERNOULLI	Set12	3	150	0.949662	25.2042
BERNOULLI	Set12	3	160	0.942672	25.098
BERNOULLI	Set12	3	170	0.937769	25.0366
BERNOULLI	Set12	3	180	0.929723	24.7836
BERNOULLI	Set12	3	190	0.922668	24.6039
BERNOULLI	Set12	3	200	0.916605	24.5893
BERNOULLI	Set12	3	210	0.903391	24.1992
BERNOULLI	Set12	3	220	0.880151	23.8207
BERNOULLI	Set12	3	230	0.854071	23.2669
BERNOULLI	Set12	3	240	0.796622	22.0984
BERNOULLI	Set12	2	150	0.952988	38.3197
BERNOULLI	Set12	2	160	0.94827	37.5982
BERNOULLI	Set12	2	170	0.940708	36.771
BERNOULLI	Set12	2	180	0.932453	36.1127
BERNOULLI	Set12	2	190	0.922284	34.9722
BERNOULLI	Set12	2	200	0.910217	34.1384
BERNOULLI	Set12	2	210	0.896607	33.3812
BERNOULLI	Set12	2	220	0.881259	32.0954
BERNOULLI	Set12	2	230	0.856891	29.5468
BERNOULLI	Set12	2	240	0.818185	27.1789
BERNOULLI	Set12	6	150	0.927275	28.7848
BERNOULLI	Set12	6	160	0.9171	28.1113
BERNOULLI	Set12	6	170	0.908164	27.5397
BERNOULLI	Set12	6	180	0.895121	26.8653
BERNOULLI	Set12	6	190	0.882346	26.2319
BERNOULLI	Set12	6	200	0.864125	25.5041
BERNOULLI	Set12	6	210	0.841802	24.5888
BERNOULLI	Set12	6	220	0.820948	23.9565
BERNOULLI	Set12	6	230	0.769256	22.2621
BERNOULLI	Set12	6	240	0.727796	21.1813
BERNOULLI	Set12	12	150	0.940223	33.118
BERNOULLI	Set12	12	160	0.932334	32.605
BERNOULLI	Set12	12	170	0.923612	31.8833
BERNOULLI	Set12	12	180	0.912177	31.1754
BERNOULLI	Set12	12	190	0.899985	30.5018
BERNOULLI	Set12	12	200	0.884633	29.7441
BERNOULLI	Set12	12	210	0.860778	28.8009
BERNOULLI	Set12	12	220	0.835493	27.7495
BERNOULLI	Set12	12	230	0.79289	26.4992
BERNOULLI	Set12	12	240	0.716563	24.741
BERNOULLI	Set12	7	150	0.938158	28.1609
BERNOULLI	Set12	7	160	0.931634	28.1063
BERNOULLI	Set12	7	170	0.923091	27.1141
BERNOULLI	Set12	7	180	0.913668	26.8344
BERNOULLI	Set12	7	190	0.901324	25.9981
BERNOULLI	Set12	7	200	0.884516	25.092
BERNOULLI	Set12	7	210	0.872672	24.4387
BERNOULLI	Set12	7	220	0.841222	23.3727
BERNOULLI	Set12	7	230	0.814027	22.199
BERNOULLI	Set12	7	240	0.759406	20.3748
BERNOULLI	Set12	11	150	0.941145	33.4747
BERNOULLI	Set12	11	160	0.931659	32.8046
BERNOULLI	Set12	11	170	0.923278	32.307
BERNOULLI	Set12	11	180	0.911451	31.6066
BERNOULLI	Set12	11	190	0.89842	30.8417
BERNOULLI	Set12	11	200	0.880582	30.0686
BERNOULLI	Set12	11	210	0.857247	29.2131
BERNOULLI	Set12	11	220	0.828391	28.3179
BERNOULLI	Set12	11	230	0.788855	27.1268
BERNOULLI	Set12	11	240	0.723654	25.5951
BERNOULLI	Set12	5	150	0.973593	32.834
BERNOULLI	Set12	5	160	0.968273	31.4854
BERNOULLI	Set12	5	170	0.96128	30.4401
BERNOULLI	Set12	5	180	0.956587	30.0045
BERNOULLI	Set12	5	190	0.9488	29.0049
BERNOULLI	Set12	5	200	0.937588	27.7309
BERNOULLI	Set12	5	210	0.924278	27.0693
BERNOULLI	Set12	5	220	0.904772	25.6242
BERNOULLI	Set12	5	230	0.867602	23.466
BERNOULLI	Set12	5	240	0.813121	21.5449
BERNOULLI	Set12	4	150	0.962034	34.0127
BERNOULLI	Set12	4	160	0.956317	33.1063
BERNOULLI	Set12	4	170	0.947832	32.3255
BERNOULLI	Set12	4	180	0.937705	31.3946
BERNOULLI	Set12	4	190	0.927748	30.444
BERNOULLI	Set12	4	200	0.910052	28.9948
BERNOULLI	Set12	4	210	0.889057	27.8753
BERNOULLI	Set12	4	220	0.851395	25.8516
BERNOULLI	Set12	4	230	0.814195	24.6505
BERNOULLI	Set12	4	240	0.728511	22.6507
BERNOULLI	Set12	10	150	0.931285	33.8332
BERNOULLI	Set12	10	160	0.921217	32.9547
BERNOULLI	Set12	10	170	0.909797	32.2712
BERNOULLI	Set12	10	180	0.89655	31.4527
BERNOULLI	Set12	10	190	0.881191	30.5996
BERNOULLI	Set12	10	200	0.86357	29.8453
BERNOULLI	Set12	10	210	0.842004	28.9122
BERNOULLI	Set12	10	220	0.80787	27.6194
BERNOULLI	Set12	10	230	0.765112	26.404
BERNOULLI	Set12	10	240	0.697624	24.6649
BERNOULLI	Set12	9	150	0.956945	33.221
BERNOULLI	Set12	9	160	0.950767	32.6188
BERNOULLI	Set12	9	170	0.941374	31.5737
BERNOULLI	Set12	9	180	0.928375	30.4044
BERNOULLI	Set12	9	190	0.9078	28.9184
BERNOULLI	Set12	9	200	0.884964	27.6667
BERNOULLI	Set12	9	210	0.850648	26.2308
BERNOULLI	Set12	9	220	0.800626	24.8774
BERNOULLI	Set12	9	230	0.742209	23.7484
BERNOULLI	Set12	9	240	0.687641	22.8599
BERNOULLI	Set12	8	150	0.95239	37.0113
BERNOULLI	Set12	8	160	0.946428	36.3789
BERNOULLI	Set12	8	170	0.940614	35.6062
BERNOULLI	Set12	8	180	0.934227	34.9241
BERNOULLI	Set12	8	190	0.92517	34.0514
BERNOULLI	Set12	8	200	0.915471	33.1799
BERNOULLI	Set12	8	210	0.902605	32.1447
BERNOULLI	Set12	8	220	0.887796	31.249
BERNOULLI	Set12	8	230	0.865146	29.7423
BERNOULLI	Set12	8	240	0.823056	27.8889
BERNOULLI	Urban100	img_018_SRF_2_HR	150	0.908156	27.6392
BERNOULLI	Urban100	img_018_SRF_2_HR	160	0.895415	27.303
BERNOULLI	Urban100	img_018_SRF_2_HR	170	0.882336	26.9506
BERNOULLI	Urban100	img_018_SRF_2_HR	180	0.867547	26.6306
BERNOULLI	Urban100	img_018_SRF_2_HR	190	0.847562	26.3974
BERNOULLI	Urban100	img_018_SRF_2_HR	200	0.825167	25.7341
BERNOULLI	Urban100	img_018_SRF_2_HR	210	0.791327	25.1952
BERNOULLI	Urban100	img_018_SRF_2_HR	220	0.739546	24.3736
BERNOULLI	Urban100	img_018_SRF_2_HR	230	0.668406	23.1796
BERNOULLI	Urban100	img_018_SRF_2_HR	240	0.569651	21.7565
BERNOULLI	Urban100	img_058_SRF_2_HR	150	0.943025	23.8621
BERNOULLI	Urban100	img_058_SRF_2_HR	160	0.937419	23.4739
BERNOULLI	Urban100	img_058_SRF_2_HR	170	0.929383	23.2003
BERNOULLI	Urban100	img_058_SRF_2_HR	180	0.919165	22.9042
BERNOULLI	Urban100	img_058_SRF_2_HR	190	0.904439	22.1622
BERNOULLI	Urban100	img_058_SRF_2_HR	200	0.888572	21.6269
BERNOULLI	Urban100	img_058_SRF_2_HR	210	0.862806	20.8996
BERNOULLI	Urban100	img_058_SRF_2_HR	220	0.823434	19.9957
BERNOULLI	Urban100	img_058_SRF_2_HR	230	0.756036	18.5161
BERNOULLI	Urban100	img_058_SRF_2_HR	240	0.647796	16.6259
BERNOULLI	Urban100	img_096_SRF_2_HR	150	0.977981	32.5041
BERNOULLI	Urban100	img_096_SRF_2_HR	160	0.974619	31.7911
BERNOULLI	Urban100	img_096_SRF_2_HR	170	0.967346	30.4901
BERNOULLI	Urban100	img_096_SRF_2_HR	180	0.959826	29.5945
BERNOULLI	Urban100	img_096_SRF_2_HR	190	0.950482	28.5962
BERNOULLI	Urban100	img_096_SRF_2_HR	200	0.937865	27.4834
BERNOULLI	Urban100	img_096_SRF_2_HR	210	0.918241	26.3941
BERNOULLI	Urban100	img_096_SRF_2_HR	220	0.887995	24.9458
BERNOULLI	Urban100	img_096_SRF_2_HR	230	0.844993	23.5391
BERNOULLI	Urban100	img_096_SRF_2_HR	240	0.736482	20.9127
BERNOULLI	Urban100	img_069_SRF_2_HR	150	0.9426	29.1372
BERNOULLI	Urban100	img_069_SRF_2_HR	160	0.934655	28.6001
BERNOULLI	Urban100	img_069_SRF_2_HR	170	0.922353	27.8987
BERNOULLI	Urban100	img_069_SRF_2_HR	180	0.90956	27.1736
BERNOULLI	Urban100	img_069_SRF_2_HR	190	0.893567	26.5778
BERNOULLI	Urban100	img_069_SRF_2_HR	200	0.873616	25.8064
BERNOULLI	Urban100	img_069_SRF_2_HR	210	0.848917	25.0956
BERNOULLI	Urban100	img_069_SRF_2_HR	220	0.813002	24.1786
BERNOULLI	Urban100	img_069_SRF_2_HR	230	0.749501	22.854
BERNOULLI	Urban100	img_069_SRF_2_HR	240	0.65631	21.4403
BERNOULLI	Urban100	img_091_SRF_2_HR	150	0.90889	27.014
BERNOULLI	Urban100	img_091_SRF_2_HR	160	0.894051	26.3646
BERNOULLI	Urban100	img_091_SRF_2_HR	170	0.874525	25.7202
BERNOULLI	Urban100	img_091_SRF_2_HR	180	0.853408	25.0414
BERNOULLI	Urban100	img_091_SRF_2_HR	190	0.826018	24.3168
BERNOULLI	Urban100	img_091_SRF_2_HR	200	0.796528	23.6041
BERNOULLI	Urban100	img_091_SRF_2_HR	210	0.749384	22.7545
BERNOULLI	Urban100	img_091_SRF_2_HR	220	0.697687	21.8963
BERNOULLI	Urban100	img_091_SRF_2_HR	230	0.614713	20.7318
BERNOULLI	Urban100	img_091_SRF_2_HR	240	0.510366	19.5366
BERNOULLI	Urban100	img_084_SRF_2_HR	150	0.956366	32.6241
BERNOULLI	Urban100	img_084_SRF_2_HR	160	0.94933	31.7953
BERNOULLI	Urban100	img_084_SRF_2_HR	170	0.939821	31.0387
BERNOULLI	Urban100	img_084_SRF_2_HR	180	0.929	30.2841
BERNOULLI	Urban100	img_084_SRF_2_HR	190	0.914689	29.3336
BERNOULLI	Urban100	img_084_SRF_2_HR	200	0.893784	28.2018
BERNOULLI	Urban100	img_084_SRF_2_HR	210	0.862484	27
BERNOULLI	Urban100	img_084_SRF_2_HR	220	0.82414	25.7913
BERNOULLI	Urban100	img_084_SRF_2_HR	230	0.758276	24.3446
BERNOULLI	Urban100	img_084_SRF_2_HR	240	0.655128	22.5283
BERNOULLI	Urban100	img_083_SRF_2_HR	150	0.931531	25.8831
BERNOULLI	Urban100	img_083_SRF_2_HR	160	0.922189	25.3091
BERNOULLI	Urban100	img_083_SRF_2_HR	170	0.911767	24.9847
BERNOULLI	Urban100	img_083_SRF_2_HR	180	0.897938	24.5089
BERNOULLI	Urban100	img_083_SRF_2_HR	190	0.879156	23.9378
BERNOULLI	Urban100	img_083_SRF_2_HR	200	0.855705	23.2452
BERNOULLI	Urban100	img_083_SRF_2_HR	210	0.820209	22.5087
BERNOULLI	Urban100	img_083_SRF_2_HR	220	0.7761	21.6184
BERNOULLI	Urban100	img_083_SRF_2_HR	230	0.705183	20.5527
BERNOULLI	Urban100	img_083_SRF_2_HR	240	0.595468	19.0169
BERNOULLI	Urban100	img_029_SRF_2_HR	150	0.947497	27.4436
BERNOULLI	Urban100	img_029_SRF_2_HR	160	0.94196	27.4768
BERNOULLI	Urban100	img_029_SRF_2_HR	170	0.932261	26.8569
BERNOULLI	Urban100	img_029_SRF_2_HR	180	0.92318	26.6552
BERNOULLI	Urban100	img_029_SRF_2_HR	190	0.910225	26.4131
BERNOULLI	Urban100	img_029_SRF_2_HR	200	0.892795	25.6531
BERNOULLI	Urban100	img_029_SRF_2_HR	210	0.868387	25.0071
BERNOULLI	Urban100	img_029_SRF_2_HR	220	0.829488	23.7418
BERNOULLI	Urban100	img_029_SRF_2_HR	230	0.773689	22.6132
BERNOULLI	Urban100	img_029_SRF_2_HR	240	0.667538	20.7871
BERNOULLI	Urban100	img_059_SRF_2_HR	150	0.965249	33.1897
BERNOULLI	Urban100	img_059_SRF_2_HR	160	0.958132	31.9712
BERNOULLI	Urban100	img_059_SRF_2_HR	170	0.950834	31.1821
BERNOULLI	Urban100	img_059_SRF_2_HR	180	0.940108	29.9308
BERNOULLI	Urban100	img_059_SRF_2_HR	190	0.927532	28.9427
BERNOULLI	Urban100	img_059_SRF_2_HR	200	0.906757	27.3734
BERNOULLI	Urban100	img_059_SRF_2_HR	210	0.88312	26.2699
BERNOULLI	Urban100	img_059_SRF_2_HR	220	0.842829	24.7358
BERNOULLI	Urban100	img_059_SRF_2_HR	230	0.793703	23.2834
BERNOULLI	Urban100	img_059_SRF_2_HR	240	0.726001	21.922
BERNOULLI	Urban100	img_019_SRF_2_HR	150	0.922393	22.6665
BERNOULLI	Urban100	img_019_SRF_2_HR	160	0.911573	22.28
BERNOULLI	Urban100	img_019_SRF_2_HR	170	0.895036	21.5052
BERNOULLI	Urban100	img_019_SRF_2_HR	180	0.87846	20.9521
BERNOULLI	Urban100	img_019_SRF_2_HR	190	0.85561	20.1029
BERNOULLI	Urban100	img_019_SRF_2_HR	200	0.832466	19.469
BERNOULLI	Urban100	img_019_SRF_2_HR	210	0.797966	18.6743
BERNOULLI	Urban100	img_019_SRF_2_HR	220	0.75355	17.7952
BERNOULLI	Urban100	img_019_SRF_2_HR	230	0.692654	16.9038
BERNOULLI	Urban100	img_019_SRF_2_HR	240	0.623079	16.0927
BERNOULLI	Urban100	img_028_SRF_2_HR	150	0.975867	34.1496
BERNOULLI	Urban100	img_028_SRF_2_HR	160	0.972067	33.1625
BERNOULLI	Urban100	img_028_SRF_2_HR	170	0.967792	32.6542
BERNOULLI	Urban100	img_028_SRF_2_HR	180	0.961707	31.4191
BERNOULLI	Urban100	img_028_SRF_2_HR	190	0.955117	31.1179
BERNOULLI	Urban100	img_028_SRF_2_HR	200	0.947794	30.1984
BERNOULLI	Urban100	img_028_SRF_2_HR	210	0.93503	29.652
BERNOULLI	Urban100	img_028_SRF_2_HR	220	0.913295	28.0143
BERNOULLI	Urban100	img_028_SRF_2_HR	230	0.884788	26.9204
BERNOULLI	Urban100	img_028_SRF_2_HR	240	0.825381	25.4518
BERNOULLI	Urban100	img_082_SRF_2_HR	150	0.976478	31.1386
BERNOULLI	Urban100	img_082_SRF_2_HR	160	0.975329	31.133
BERNOULLI	Urban100	img_082_SRF_2_HR	170	0.971837	30.6925
BERNOULLI	Urban100	img_082_SRF_2_HR	180	0.968528	30.0021
BERNOULLI	Urban100	img_082_SRF_2_HR	190	0.964785	29.7835
BERNOULLI	Urban100	img_082_SRF_2_HR	200	0.957223	28.5023
BERNOULLI	Urban100	img_082_SRF_2_HR	210	0.948627	27.9594
BERNOULLI	Urban100	img_082_SRF_2_HR	220	0.936054	27.0411
BERNOULLI	Urban100	img_082_SRF_2_HR	230	0.912545	25.4523
BERNOULLI	Urban100	img_082_SRF_2_HR	240	0.869253	23.3429
BERNOULLI	Urban100	img_085_SRF_2_HR	150	0.972667	31.2205
BERNOULLI	Urban100	img_085_SRF_2_HR	160	0.96838	30.4588
BERNOULLI	Urban100	img_085_SRF_2_HR	170	0.961635	29.6027
BERNOULLI	Urban100	img_085_SRF_2_HR	180	0.95398	28.6548
BERNOULLI	Urban100	img_085_SRF_2_HR	190	0.946877	28.1081
BERNOULLI	Urban100	img_085_SRF_2_HR	200	0.933628	26.9594
BERNOULLI	Urban100	img_085_SRF_2_HR	210	0.917583	26.1058
BERNOULLI	Urban100	img_085_SRF_2_HR	220	0.899043	25.1429
BERNOULLI	Urban100	img_085_SRF_2_HR	230	0.871482	23.8575
BERNOULLI	Urban100	img_085_SRF_2_HR	240	0.811306	22.133
BERNOULLI	Urban100	img_090_SRF_2_HR	150	0.991384	39.1462
BERNOULLI	Urban100	img_090_SRF_2_HR	160	0.990341	38.6779
BERNOULLI	Urban100	img_090_SRF_2_HR	170	0.988398	37.9863
BERNOULLI	Urban100	img_090_SRF_2_HR	180	0.986602	36.9268
BERNOULLI	Urban100	img_090_SRF_2_HR	190	0.981823	35.3218
BERNOULLI	Urban100	img_090_SRF_2_HR	200	0.977477	34.6034
BERNOULLI	Urban100	img_090_SRF_2_HR	210	0.971832	33.4572
BERNOULLI	Urban100	img_090_SRF_2_HR	220	0.959713	31.9479
BERNOULLI	Urban100	img_090_SRF_2_HR	230	0.93083	29.4226
BERNOULLI	Urban100	img_090_SRF_2_HR	240	0.87175	27.2
BERNOULLI	Urban100	img_068_SRF_2_HR	150	0.983118	36.1778
BERNOULLI	Urban100	img_068_SRF_2_HR	160	0.97971	34.9659
BERNOULLI	Urban100	img_068_SRF_2_HR	170	0.975298	34.3176
BERNOULLI	Urban100	img_068_SRF_2_HR	180	0.96858	33.2164
BERNOULLI	Urban100	img_068_SRF_2_HR	190	0.956983	31.7472
BERNOULLI	Urban100	img_068_SRF_2_HR	200	0.943523	30.6153
BERNOULLI	Urban100	img_068_SRF_2_HR	210	0.91918	29.1136
BERNOULLI	Urban100	img_068_SRF_2_HR	220	0.876634	27.2126
BERNOULLI	Urban100	img_068_SRF_2_HR	230	0.819732	25.5672
BERNOULLI	Urban100	img_068_SRF_2_HR	240	0.715333	23.4422
BERNOULLI	Urban100	img_097_SRF_2_HR	150	0.956817	30.1733
BERNOULLI	Urban100	img_097_SRF_2_HR	160	0.951544	29.5379
BERNOULLI	Urban100	img_097_SRF_2_HR	170	0.942132	28.8221
BERNOULLI	Urban100	img_097_SRF_2_HR	180	0.929274	27.8549
BERNOULLI	Urban100	img_097_SRF_2_HR	190	0.914799	26.9824
BERNOULLI	Urban100	img_097_SRF_2_HR	200	0.89884	26.2278
BERNOULLI	Urban100	img_097_SRF_2_HR	210	0.875169	25.258
BERNOULLI	Urban100	img_097_SRF_2_HR	220	0.837582	24.0036
BERNOULLI	Urban100	img_097_SRF_2_HR	230	0.783966	22.776
BERNOULLI	Urban100	img_097_SRF_2_HR	240	0.701476	21.2145
BERNOULLI	Urban100	img_062_SRF_2_HR	150	0.89399	21.9408
BERNOULLI	Urban100	img_062_SRF_2_HR	160	0.885411	21.9654
BERNOULLI	Urban100	img_062_SRF_2_HR	170	0.872746	21.7557
BERNOULLI	Urban100	img_062_SRF_2_HR	180	0.861764	21.6464
BERNOULLI	Urban100	img_062_SRF_2_HR	190	0.838586	21.1415
BERNOULLI	Urban100	img_062_SRF_2_HR	200	0.809539	20.7443
BERNOULLI	Urban100	img_062_SRF_2_HR	210	0.773102	20.1395
BERNOULLI	Urban100	img_062_SRF_2_HR	220	0.727343	19.5718
BERNOULLI	Urban100	img_062_SRF_2_HR	230	0.665018	18.7861
BERNOULLI	Urban100	img_062_SRF_2_HR	240	0.570698	17.8381
BERNOULLI	Urban100	img_037_SRF_2_HR	150	0.927489	25.4806
BERNOULLI	Urban100	img_037_SRF_2_HR	160	0.915678	25.3476
BERNOULLI	Urban100	img_037_SRF_2_HR	170	0.898125	24.485
BERNOULLI	Urban100	img_037_SRF_2_HR	180	0.881441	23.7915
BERNOULLI	Urban100	img_037_SRF_2_HR	190	0.860062	23.4491
BERNOULLI	Urban100	img_037_SRF_2_HR	200	0.832085	22.722
BERNOULLI	Urban100	img_037_SRF_2_HR	210	0.798176	22.024
BERNOULLI	Urban100	img_037_SRF_2_HR	220	0.754778	21.4394
BERNOULLI	Urban100	img_037_SRF_2_HR	230	0.69317	20.4559
BERNOULLI	Urban100	img_037_SRF_2_HR	240	0.596365	19.1683
BERNOULLI	Urban100	img_065_SRF_2_HR	150	0.965959	32.3052
BERNOULLI	Urban100	img_065_SRF_2_HR	160	0.960614	31.6801
BERNOULLI	Urban100	img_065_SRF_2_HR	170	0.952712	30.7849
BERNOULLI	Urban100	img_065_SRF_2_HR	180	0.942446	29.9452
BERNOULLI	Urban100	img_065_SRF_2_HR	190	0.927901	28.9352
BERNOULLI	Urban100	img_065_SRF_2_HR	200	0.912473	28.0576
BERNOULLI	Urban100	img_065_SRF_2_HR	210	0.886017	26.852
BERNOULLI	Urban100	img_065_SRF_2_HR	220	0.849955	25.7948
BERNOULLI	Urban100	img_065_SRF_2_HR	230	0.781414	24.0169
BERNOULLI	Urban100	img_065_SRF_2_HR	240	0.676629	22.2662
BERNOULLI	Urban100	img_030_SRF_2_HR	150	0.956407	27.1816
BERNOULLI	Urban100	img_030_SRF_2_HR	160	0.94961	26.8552
BERNOULLI	Urban100	img_030_SRF_2_HR	170	0.94144	26.2692
BERNOULLI	Urban100	img_030_SRF_2_HR	180	0.929951	25.6282
BERNOULLI	Urban100	img_030_SRF_2_HR	190	0.914384	24.9223
BERNOULLI	Urban100	img_030_SRF_2_HR	200	0.894017	23.9796
BERNOULLI	Urban100	img_030_SRF_2_HR	210	0.864491	23.0045
BERNOULLI	Urban100	img_030_SRF_2_HR	220	0.82657	21.8093
BERNOULLI	Urban100	img_030_SRF_2_HR	230	0.747892	20.1813
BERNOULLI	Urban100	img_030_SRF_2_HR	240	0.623315	18.2442
BERNOULLI	Urban100	img_070_SRF_2_HR	150	0.898803	28.5318
BERNOULLI	Urban100	img_070_SRF_2_HR	160	0.885975	27.9907
BERNOULLI	Urban100	img_070_SRF_2_HR	170	0.870775	27.3934
BERNOULLI	Urban100	img_070_SRF_2_HR	180	0.85466	26.9363
BERNOULLI	Urban100	img_070_SRF_2_HR	190	0.833607	26.1831
BERNOULLI	Urban100	img_070_SRF_2_HR	200	0.810989	25.6241
BERNOULLI	Urban100	img_070_SRF_2_HR	210	0.784547	24.959
BERNOULLI	Urban100	img_070_SRF_2_HR	220	0.747818	24.1632
BERNOULLI	Urban100	img_070_SRF_2_HR	230	0.697417	23.1814
BERNOULLI	Urban100	img_070_SRF_2_HR	240	0.626205	22.1026
BERNOULLI	Urban100	img_025_SRF_2_HR	150	0.985768	38.8928
BERNOULLI	Urban100	img_025_SRF_2_HR	160	0.983619	37.9222
BERNOULLI	Urban100	img_025_SRF_2_HR	170	0.980936	37.3544
BERNOULLI	Urban100	img_025_SRF_2_HR	180	0.977819	36.5413
BERNOULLI	Urban100	img_025_SRF_2_HR	190	0.973709	35.0263
BERNOULLI	Urban100	img_025_SRF_2_HR	200	0.96701	33.9043
BERNOULLI	Urban100	img_025_SRF_2_HR	210	0.959192	32.0509
BERNOULLI	Urban100	img_025_SRF_2_HR	220	0.94623	30.3777
BERNOULLI	Urban100	img_025_SRF_2_HR	230	0.922199	27.9559
BERNOULLI	Urban100	img_025_SRF_2_HR	240	0.874877	24.932
BERNOULLI	Urban100	img_100_SRF_2_HR	150	0.953602	27.5296
BERNOULLI	Urban100	img_100_SRF_2_HR	160	0.944666	27.2206
BERNOULLI	Urban100	img_100_SRF_2_HR	170	0.938149	27.0761
BERNOULLI	Urban100	img_100_SRF_2_HR	180	0.924966	26.4454
BERNOULLI	Urban100	img_100_SRF_2_HR	190	0.913589	26.0151
BERNOULLI	Urban100	img_100_SRF_2_HR	200	0.897725	25.5725
BERNOULLI	Urban100	img_100_SRF_2_HR	210	0.881125	24.8628
BERNOULLI	Urban100	img_100_SRF_2_HR	220	0.852811	24.0909
BERNOULLI	Urban100	img_100_SRF_2_HR	230	0.812603	22.8607
BERNOULLI	Urban100	img_100_SRF_2_HR	240	0.72068	20.3778
BERNOULLI	Urban100	img_088_SRF_2_HR	150	0.876021	23.4463
BERNOULLI	Urban100	img_088_SRF_2_HR	160	0.859615	22.9305
BERNOULLI	Urban100	img_088_SRF_2_HR	170	0.838343	22.3264
BERNOULLI	Urban100	img_088_SRF_2_HR	180	0.811768	21.7655
BERNOULLI	Urban100	img_088_SRF_2_HR	190	0.782025	21.1292
BERNOULLI	Urban100	img_088_SRF_2_HR	200	0.750399	20.5489
BERNOULLI	Urban100	img_088_SRF_2_HR	210	0.708897	19.8674
BERNOULLI	Urban100	img_088_SRF_2_HR	220	0.653027	19.0931
BERNOULLI	Urban100	img_088_SRF_2_HR	230	0.585795	18.2803
BERNOULLI	Urban100	img_088_SRF_2_HR	240	0.486005	17.2366
BERNOULLI	Urban100	img_077_SRF_2_HR	150	0.903511	27.5708
BERNOULLI	Urban100	img_077_SRF_2_HR	160	0.88862	26.9449
BERNOULLI	Urban100	img_077_SRF_2_HR	170	0.87511	26.522
BERNOULLI	Urban100	img_077_SRF_2_HR	180	0.855302	25.8275
BERNOULLI	Urban100	img_077_SRF_2_HR	190	0.83662	25.3242
BERNOULLI	Urban100	img_077_SRF_2_HR	200	0.813067	24.7073
BERNOULLI	Urban100	img_077_SRF_2_HR	210	0.785744	24.1533
BERNOULLI	Urban100	img_077_SRF_2_HR	220	0.742557	23.344
BERNOULLI	Urban100	img_077_SRF_2_HR	230	0.691428	22.4738
BERNOULLI	Urban100	img_077_SRF_2_HR	240	0.622686	21.4338
BERNOULLI	Urban100	img_022_SRF_2_HR	150	0.944453	30.7716
BERNOULLI	Urban100	img_022_SRF_2_HR	160	0.937877	30.3935
BERNOULLI	Urban100	img_022_SRF_2_HR	170	0.92507	29.3572
BERNOULLI	Urban100	img_022_SRF_2_HR	180	0.915857	29.1007
BERNOULLI	Urban100	img_022_SRF_2_HR	190	0.897466	28.1266
BERNOULLI	Urban100	img_022_SRF_2_HR	200	0.880512	27.4408
BERNOULLI	Urban100	img_022_SRF_2_HR	210	0.856403	26.7376
BERNOULLI	Urban100	img_022_SRF_2_HR	220	0.824286	25.8457
BERNOULLI	Urban100	img_022_SRF_2_HR	230	0.776777	24.5475
BERNOULLI	Urban100	img_022_SRF_2_HR	240	0.706348	23.4416
BERNOULLI	Urban100	img_041_SRF_2_HR	150	0.961794	26.112
BERNOULLI	Urban100	img_041_SRF_2_HR	160	0.952919	25.2558
BERNOULLI	Urban100	img_041_SRF_2_HR	170	0.941133	24.1429
BERNOULLI	Urban100	img_041_SRF_2_HR	180	0.927257	23.2059
BERNOULLI	Urban100	img_041_SRF_2_HR	190	0.905907	22.1758
BERNOULLI	Urban100	img_041_SRF_2_HR	200	0.874282	20.7649
BERNOULLI	Urban100	img_041_SRF_2_HR	210	0.836025	19.576
BERNOULLI	Urban100	img_041_SRF_2_HR	220	0.777684	18.1978
BERNOULLI	Urban100	img_041_SRF_2_HR	230	0.698996	16.9055
BERNOULLI	Urban100	img_041_SRF_2_HR	240	0.57952	15.2136
BERNOULLI	Urban100	img_014_SRF_2_HR	150	0.944689	29.6108
BERNOULLI	Urban100	img_014_SRF_2_HR	160	0.934741	28.9014
BERNOULLI	Urban100	img_014_SRF_2_HR	170	0.923466	28.1261
BERNOULLI	Urban100	img_014_SRF_2_HR	180	0.910523	27.456
BERNOULLI	Urban100	img_014_SRF_2_HR	190	0.894427	26.8443
BERNOULLI	Urban100	img_014_SRF_2_HR	200	0.870713	25.8809
BERNOULLI	Urban100	img_014_SRF_2_HR	210	0.838979	24.9102
BERNOULLI	Urban100	img_014_SRF_2_HR	220	0.799607	24.0102
BERNOULLI	Urban100	img_014_SRF_2_HR	230	0.737299	22.8655
BERNOULLI	Urban100	img_014_SRF_2_HR	240	0.653172	21.5765
BERNOULLI	Urban100	img_046_SRF_2_HR	150	0.944382	30.2413
BERNOULLI	Urban100	img_046_SRF_2_HR	160	0.936388	29.8414
BERNOULLI	Urban100	img_046_SRF_2_HR	170	0.927213	29.2519
BERNOULLI	Urban100	img_046_SRF_2_HR	180	0.916229	28.5175
BERNOULLI	Urban100	img_046_SRF_2_HR	190	0.902472	27.857
BERNOULLI	Urban100	img_046_SRF_2_HR	200	0.881046	27.009
BERNOULLI	Urban100	img_046_SRF_2_HR	210	0.858786	26.2117
BERNOULLI	Urban100	img_046_SRF_2_HR	220	0.824	25.2361
BERNOULLI	Urban100	img_046_SRF_2_HR	230	0.777464	24.3628
BERNOULLI	Urban100	img_046_SRF_2_HR	240	0.703504	22.8301
BERNOULLI	Urban100	img_013_SRF_2_HR	150	0.966645	33.3196
BERNOULLI	Urban100	img_013_SRF_2_HR	160	0.960622	32.3975
BERNOULLI	Urban100	img_013_SRF_2_HR	170	0.953582	31.5143
BERNOULLI	Urban100	img_013_SRF_2_HR	180	0.941943	30.3612
BERNOULLI	Urban100	img_013_SRF_2_HR	190	0.931178	29.5129
BERNOULLI	Urban100	img_013_SRF_2_HR	200	0.912856	28.4205
BERNOULLI	Urban100	img_013_SRF_2_HR	210	0.888709	27.0941
BERNOULLI	Urban100	img_013_SRF_2_HR	220	0.853759	25.7609
BERNOULLI	Urban100	img_013_SRF_2_HR	230	0.798212	24.0347
BERNOULLI	Urban100	img_013_SRF_2_HR	240	0.710799	22.1459
BERNOULLI	Urban100	img_053_SRF_2_HR	150	0.948344	26.0963
BERNOULLI	Urban100	img_053_SRF_2_HR	160	0.940188	25.6285
BERNOULLI	Urban100	img_053_SRF_2_HR	170	0.928835	24.7882
BERNOULLI	Urban100	img_053_SRF_2_HR	180	0.914064	24.0961
BERNOULLI	Urban100	img_053_SRF_2_HR	190	0.892232	23.0844
BERNOULLI	Urban100	img_053_SRF_2_HR	200	0.866618	22.1359
BERNOULLI	Urban100	img_053_SRF_2_HR	210	0.834396	21.3088
BERNOULLI	Urban100	img_053_SRF_2_HR	220	0.787851	20.1966
BERNOULLI	Urban100	img_053_SRF_2_HR	230	0.717133	18.7903
BERNOULLI	Urban100	img_053_SRF_2_HR	240	0.614165	17.2412
BERNOULLI	Urban100	img_006_SRF_2_HR	150	0.918407	26.1715
BERNOULLI	Urban100	img_006_SRF_2_HR	160	0.909379	25.829
BERNOULLI	Urban100	img_006_SRF_2_HR	170	0.890028	25.2359
BERNOULLI	Urban100	img_006_SRF_2_HR	180	0.870973	24.4906
BERNOULLI	Urban100	img_006_SRF_2_HR	190	0.842148	23.6512
BERNOULLI	Urban100	img_006_SRF_2_HR	200	0.80543	22.6543
BERNOULLI	Urban100	img_006_SRF_2_HR	210	0.761387	21.7521
BERNOULLI	Urban100	img_006_SRF_2_HR	220	0.707123	20.8519
BERNOULLI	Urban100	img_006_SRF_2_HR	230	0.624476	19.7114
BERNOULLI	Urban100	img_006_SRF_2_HR	240	0.520094	18.6523
BERNOULLI	Urban100	img_054_SRF_2_HR	150	0.941251	27.285
BERNOULLI	Urban100	img_054_SRF_2_HR	160	0.930284	26.3586
BERNOULLI	Urban100	img_054_SRF_2_HR	170	0.92	25.8549
BERNOULLI	Urban100	img_054_SRF_2_HR	180	0.904069	24.9918
BERNOULLI	Urban100	img_054_SRF_2_HR	190	0.886095	24.1201
BERNOULLI	Urban100	img_054_SRF_2_HR	200	0.867464	23.4122
BERNOULLI	Urban100	img_054_SRF_2_HR	210	0.839527	22.571
BERNOULLI	Urban100	img_054_SRF_2_HR	220	0.797127	21.4611
BERNOULLI	Urban100	img_054_SRF_2_HR	230	0.740921	20.4626
BERNOULLI	Urban100	img_054_SRF_2_HR	240	0.652104	19.2187
BERNOULLI	Urban100	img_001_SRF_2_HR	150	0.911266	25.3837
BERNOULLI	Urban100	img_001_SRF_2_HR	160	0.904427	25.4293
BERNOULLI	Urban100	img_001_SRF_2_HR	170	0.895832	25.3321
BERNOULLI	Urban100	img_001_SRF_2_HR	180	0.888301	25.3824
BERNOULLI	Urban100	img_001_SRF_2_HR	190	0.872625	25.0287
BERNOULLI	Urban100	img_001_SRF_2_HR	200	0.859067	25.0399
BERNOULLI	Urban100	img_001_SRF_2_HR	210	0.835437	24.5261
BERNOULLI	Urban100	img_001_SRF_2_HR	220	0.804373	23.9148
BERNOULLI	Urban100	img_001_SRF_2_HR	230	0.764911	23.4968
BERNOULLI	Urban100	img_001_SRF_2_HR	240	0.683979	22.0288
BERNOULLI	Urban100	img_023_SRF_2_HR	150	0.74904	8.38018
BERNOULLI	Urban100	img_023_SRF_2_HR	160	0.746508	8.44138
BERNOULLI	Urban100	img_023_SRF_2_HR	170	0.742328	8.50484
BERNOULLI	Urban100	img_023_SRF_2_HR	180	0.73763	8.57368
BERNOULLI	Urban100	img_023_SRF_2_HR	190	0.735531	8.66845
BERNOULLI	Urban100	img_023_SRF_2_HR	200	0.728288	8.78734
BERNOULLI	Urban100	img_023_SRF_2_HR	210	0.717169	8.78897
BERNOULLI	Urban100	img_023_SRF_2_HR	220	0.701586	8.77394
BERNOULLI	Urban100	img_023_SRF_2_HR	230	0.667668	8.74183
BERNOULLI	Urban100	img_023_SRF_2_HR	240	0.593431	8.68924
BERNOULLI	Urban100	img_076_SRF_2_HR	150	0.920388	26.4124
BERNOULLI	Urban100	img_076_SRF_2_HR	160	0.904007	25.6855
BERNOULLI	Urban100	img_076_SRF_2_HR	170	0.885789	24.941
BERNOULLI	Urban100	img_076_SRF_2_HR	180	0.868607	24.452
BERNOULLI	Urban100	img_076_SRF_2_HR	190	0.845847	23.8076
BERNOULLI	Urban100	img_076_SRF_2_HR	200	0.814012	22.9455
BERNOULLI	Urban100	img_076_SRF_2_HR	210	0.776954	22.1701
BERNOULLI	Urban100	img_076_SRF_2_HR	220	0.722016	21.1186
BERNOULLI	Urban100	img_076_SRF_2_HR	230	0.660231	20.3027
BERNOULLI	Urban100	img_076_SRF_2_HR	240	0.586496	19.2055
BERNOULLI	Urban100	img_089_SRF_2_HR	150	0.927803	30.7161
BERNOULLI	Urban100	img_089_SRF_2_HR	160	0.917538	30.1097
BERNOULLI	Urban100	img_089_SRF_2_HR	170	0.904804	29.4447
BERNOULLI	Urban100	img_089_SRF_2_HR	180	0.890227	28.8181
BERNOULLI	Urban100	img_089_SRF_2_HR	190	0.869949	28.0566
BERNOULLI	Urban100	img_089_SRF_2_HR	200	0.850308	27.3802
BERNOULLI	Urban100	img_089_SRF_2_HR	210	0.816561	26.4735
BERNOULLI	Urban100	img_089_SRF_2_HR	220	0.775347	25.5584
BERNOULLI	Urban100	img_089_SRF_2_HR	230	0.718443	24.4462
BERNOULLI	Urban100	img_089_SRF_2_HR	240	0.620872	23.05
BERNOULLI	Urban100	img_024_SRF_2_HR	150	0.963634	26.173
BERNOULLI	Urban100	img_024_SRF_2_HR	160	0.954987	25.5719
BERNOULLI	Urban100	img_024_SRF_2_HR	170	0.947466	25.2666
BERNOULLI	Urban100	img_024_SRF_2_HR	180	0.93617	24.8396
BERNOULLI	Urban100	img_024_SRF_2_HR	190	0.919841	24.178
BERNOULLI	Urban100	img_024_SRF_2_HR	200	0.902942	23.3519
BERNOULLI	Urban100	img_024_SRF_2_HR	210	0.880992	22.6855
BERNOULLI	Urban100	img_024_SRF_2_HR	220	0.845542	21.4742
BERNOULLI	Urban100	img_024_SRF_2_HR	230	0.786944	20.203
BERNOULLI	Urban100	img_024_SRF_2_HR	240	0.693708	18.4595
BERNOULLI	Urban100	img_071_SRF_2_HR	150	0.923918	33.7671
BERNOULLI	Urban100	img_071_SRF_2_HR	160	0.913763	33.277
BERNOULLI	Urban100	img_071_SRF_2_HR	170	0.901348	32.5214
BERNOULLI	Urban100	img_071_SRF_2_HR	180	0.890344	32.2076
BERNOULLI	Urban100	img_071_SRF_2_HR	190	0.872489	31.3357
BERNOULLI	Urban100	img_071_SRF_2_HR	200	0.849164	30.4022
BERNOULLI	Urban100	img_071_SRF_2_HR	210	0.826908	29.7547
BERNOULLI	Urban100	img_071_SRF_2_HR	220	0.786927	28.4714
BERNOULLI	Urban100	img_071_SRF_2_HR	230	0.735041	27.1736
BERNOULLI	Urban100	img_071_SRF_2_HR	240	0.649172	25.6565
BERNOULLI	Urban100	img_031_SRF_2_HR	150	0.890147	22.1316
BERNOULLI	Urban100	img_031_SRF_2_HR	160	0.880721	21.3726
BERNOULLI	Urban100	img_031_SRF_2_HR	170	0.8657	21.7102
BERNOULLI	Urban100	img_031_SRF_2_HR	180	0.852507	20.5771
BERNOULLI	Urban100	img_031_SRF_2_HR	190	0.833776	21.3472
BERNOULLI	Urban100	img_031_SRF_2_HR	200	0.811189	21.3708
BERNOULLI	Urban100	img_031_SRF_2_HR	210	0.783693	20.7956
BERNOULLI	Urban100	img_031_SRF_2_HR	220	0.747096	20.4987
BERNOULLI	Urban100	img_031_SRF_2_HR	230	0.693771	19.8287
BERNOULLI	Urban100	img_031_SRF_2_HR	240	0.607299	18.6443
BERNOULLI	Urban100	img_064_SRF_2_HR	150	0.960505	31.5303
BERNOULLI	Urban100	img_064_SRF_2_HR	160	0.954176	30.8417
BERNOULLI	Urban100	img_064_SRF_2_HR	170	0.945948	30.0105
BERNOULLI	Urban100	img_064_SRF_2_HR	180	0.934464	29.1515
BERNOULLI	Urban100	img_064_SRF_2_HR	190	0.922154	28.4136
BERNOULLI	Urban100	img_064_SRF_2_HR	200	0.901844	27.3253
BERNOULLI	Urban100	img_064_SRF_2_HR	210	0.876209	26.4168
BERNOULLI	Urban100	img_064_SRF_2_HR	220	0.841978	25.1858
BERNOULLI	Urban100	img_064_SRF_2_HR	230	0.790507	23.8408
BERNOULLI	Urban100	img_064_SRF_2_HR	240	0.708484	22.0119
BERNOULLI	Urban100	img_036_SRF_2_HR	150	0.975844	34.1465
BERNOULLI	Urban100	img_036_SRF_2_HR	160	0.970239	33.2249
BERNOULLI	Urban100	img_036_SRF_2_HR	170	0.964178	31.9133
BERNOULLI	Urban100	img_036_SRF_2_HR	180	0.957047	30.9383
BERNOULLI	Urban100	img_036_SRF_2_HR	190	0.94847	29.9621
BERNOULLI	Urban100	img_036_SRF_2_HR	200	0.934354	28.6513
BERNOULLI	Urban100	img_036_SRF_2_HR	210	0.909132	26.735
BERNOULLI	Urban100	img_036_SRF_2_HR	220	0.882757	25.6154
BERNOULLI	Urban100	img_036_SRF_2_HR	230	0.836688	23.7337
BERNOULLI	Urban100	img_036_SRF_2_HR	240	0.742464	21.245
BERNOULLI	Urban100	img_063_SRF_2_HR	150	0.927579	25.9061
BERNOULLI	Urban100	img_063_SRF_2_HR	160	0.919914	25.2407
BERNOULLI	Urban100	img_063_SRF_2_HR	170	0.908511	24.7007
BERNOULLI	Urban100	img_063_SRF_2_HR	180	0.895423	24.0794
BERNOULLI	Urban100	img_063_SRF_2_HR	190	0.881844	23.5458
BERNOULLI	Urban100	img_063_SRF_2_HR	200	0.860658	22.8017
BERNOULLI	Urban100	img_063_SRF_2_HR	210	0.837986	21.8863
BERNOULLI	Urban100	img_063_SRF_2_HR	220	0.802954	20.6901
BERNOULLI	Urban100	img_063_SRF_2_HR	230	0.744402	19.0675
BERNOULLI	Urban100	img_063_SRF_2_HR	240	0.633044	16.7558
BERNOULLI	Urban100	img_055_SRF_2_HR	150	0.988772	39.5551
BERNOULLI	Urban100	img_055_SRF_2_HR	160	0.986453	38.4099
BERNOULLI	Urban100	img_055_SRF_2_HR	170	0.985169	37.8614
BERNOULLI	Urban100	img_055_SRF_2_HR	180	0.982779	36.5176
BERNOULLI	Urban100	img_055_SRF_2_HR	190	0.979172	35.6418
BERNOULLI	Urban100	img_055_SRF_2_HR	200	0.97426	34.1159
BERNOULLI	Urban100	img_055_SRF_2_HR	210	0.967107	33.1706
BERNOULLI	Urban100	img_055_SRF_2_HR	220	0.954631	31.08
BERNOULLI	Urban100	img_055_SRF_2_HR	230	0.933012	28.6054
BERNOULLI	Urban100	img_055_SRF_2_HR	240	0.858077	24.507
BERNOULLI	Urban100	img_007_SRF_2_HR	150	0.967924	31.9679
BERNOULLI	Urban100	img_007_SRF_2_HR	160	0.962831	31.6345
BERNOULLI	Urban100	img_007_SRF_2_HR	170	0.953562	30.4029
BERNOULLI	Urban100	img_007_SRF_2_HR	180	0.945649	29.4254
BERNOULLI	Urban100	img_007_SRF_2_HR	190	0.931956	28.6149
BERNOULLI	Urban100	img_007_SRF_2_HR	200	0.914498	27.1465
BERNOULLI	Urban100	img_007_SRF_2_HR	210	0.889465	25.8832
BERNOULLI	Urban100	img_007_SRF_2_HR	220	0.857228	24.7201
BERNOULLI	Urban100	img_007_SRF_2_HR	230	0.805504	23.0474
BERNOULLI	Urban100	img_007_SRF_2_HR	240	0.707669	20.887
BERNOULLI	Urban100	img_052_SRF_2_HR	150	0.982885	33.4675
BERNOULLI	Urban100	img_052_SRF_2_HR	160	0.978475	32.3809
BERNOULLI	Urban100	img_052_SRF_2_HR	170	0.976541	32.6473
BERNOULLI	Urban100	img_052_SRF_2_HR	180	0.969798	31.5491
BERNOULLI	Urban100	img_052_SRF_2_HR	190	0.962241	30.8822
BERNOULLI	Urban100	img_052_SRF_2_HR	200	0.948957	29.5067
BERNOULLI	Urban100	img_052_SRF_2_HR	210	0.9324	28.1647
BERNOULLI	Urban100	img_052_SRF_2_HR	220	0.904526	26.4991
BERNOULLI	Urban100	img_052_SRF_2_HR	230	0.858385	24.7899
BERNOULLI	Urban100	img_052_SRF_2_HR	240	0.771781	22.0363
BERNOULLI	Urban100	img_012_SRF_2_HR	150	0.94308	28.9513
BERNOULLI	Urban100	img_012_SRF_2_HR	160	0.929446	28.0207
BERNOULLI	Urban100	img_012_SRF_2_HR	170	0.9178	27.4218
BERNOULLI	Urban100	img_012_SRF_2_HR	180	0.906675	26.9012
BERNOULLI	Urban100	img_012_SRF_2_HR	190	0.886099	26.1287
BERNOULLI	Urban100	img_012_SRF_2_HR	200	0.862773	25.3956
BERNOULLI	Urban100	img_012_SRF_2_HR	210	0.833219	24.4938
BERNOULLI	Urban100	img_012_SRF_2_HR	220	0.793697	23.6411
BERNOULLI	Urban100	img_012_SRF_2_HR	230	0.737815	22.6716
BERNOULLI	Urban100	img_012_SRF_2_HR	240	0.653927	21.4886
BERNOULLI	Urban100	img_047_SRF_2_HR	150	0.940975	26.6347
BERNOULLI	Urban100	img_047_SRF_2_HR	160	0.929115	25.7441
BERNOULLI	Urban100	img_047_SRF_2_HR	170	0.91655	25.2015
BERNOULLI	Urban100	img_047_SRF_2_HR	180	0.899986	24.3558
BERNOULLI	Urban100	img_047_SRF_2_HR	190	0.880678	23.747
BERNOULLI	Urban100	img_047_SRF_2_HR	200	0.849595	22.7581
BERNOULLI	Urban100	img_047_SRF_2_HR	210	0.816731	22.0175
BERNOULLI	Urban100	img_047_SRF_2_HR	220	0.776438	21.2377
BERNOULLI	Urban100	img_047_SRF_2_HR	230	0.711446	20.0526
BERNOULLI	Urban100	img_047_SRF_2_HR	240	0.619625	18.7975
BERNOULLI	Urban100	img_015_SRF_2_HR	150	0.957153	31.1456
BERNOULLI	Urban100	img_015_SRF_2_HR	160	0.950681	30.338
BERNOULLI	Urban100	img_015_SRF_2_HR	170	0.942048	29.438
BERNOULLI	Urban100	img_015_SRF_2_HR	180	0.930797	28.4396
BERNOULLI	Urban100	img_015_SRF_2_HR	190	0.916246	27.563
BERNOULLI	Urban100	img_015_SRF_2_HR	200	0.900039	26.5043
BERNOULLI	Urban100	img_015_SRF_2_HR	210	0.878264	25.5024
BERNOULLI	Urban100	img_015_SRF_2_HR	220	0.841118	24.0682
BERNOULLI	Urban100	img_015_SRF_2_HR	230	0.787033	22.3904
BERNOULLI	Urban100	img_015_SRF_2_HR	240	0.691979	20.3441
BERNOULLI	Urban100	img_040_SRF_2_HR	150	0.99309	32.1352
BERNOULLI	Urban100	img_040_SRF_2_HR	160	0.991821	31.6023
BERNOULLI	Urban100	img_040_SRF_2_HR	170	0.989075	29.9371
BERNOULLI	Urban100	img_040_SRF_2_HR	180	0.986787	28.9154
BERNOULLI	Urban100	img_040_SRF_2_HR	190	0.981215	27.2989
BERNOULLI	Urban100	img_040_SRF_2_HR	200	0.977028	26.2888
BERNOULLI	Urban100	img_040_SRF_2_HR	210	0.968659	24.9952
BERNOULLI	Urban100	img_040_SRF_2_HR	220	0.947784	22.7378
BERNOULLI	Urban100	img_040_SRF_2_HR	230	0.921054	20.8535
BERNOULLI	Urban100	img_040_SRF_2_HR	240	0.849867	18.164
BERNOULLI	Urban100	img_073_SRF_2_HR	150	0.889075	25.0143
BERNOULLI	Urban100	img_073_SRF_2_HR	160	0.869139	24.3575
BERNOULLI	Urban100	img_073_SRF_2_HR	170	0.848599	23.7562
BERNOULLI	Urban100	img_073_SRF_2_HR	180	0.821944	23.0819
BERNOULLI	Urban100	img_073_SRF_2_HR	190	0.793109	22.4316
BERNOULLI	Urban100	img_073_SRF_2_HR	200	0.757565	21.8258
BERNOULLI	Urban100	img_073_SRF_2_HR	210	0.706301	20.9405
BERNOULLI	Urban100	img_073_SRF_2_HR	220	0.644047	20.0672
BERNOULLI	Urban100	img_073_SRF_2_HR	230	0.560504	19.1061
BERNOULLI	Urban100	img_073_SRF_2_HR	240	0.417722	17.7649
BERNOULLI	Urban100	img_026_SRF_2_HR	150	0.976197	38.3515
BERNOULLI	Urban100	img_026_SRF_2_HR	160	0.973491	37.6271
BERNOULLI	Urban100	img_026_SRF_2_HR	170	0.971055	36.6872
BERNOULLI	Urban100	img_026_SRF_2_HR	180	0.967272	36.1432
BERNOULLI	Urban100	img_026_SRF_2_HR	190	0.962645	34.8377
BERNOULLI	Urban100	img_026_SRF_2_HR	200	0.955293	33.3801
BERNOULLI	Urban100	img_026_SRF_2_HR	210	0.944012	32.0095
BERNOULLI	Urban100	img_026_SRF_2_HR	220	0.924693	30.3689
BERNOULLI	Urban100	img_026_SRF_2_HR	230	0.898607	28.4694
BERNOULLI	Urban100	img_026_SRF_2_HR	240	0.830731	25.5108
BERNOULLI	Urban100	img_074_SRF_2_HR	150	0.940774	30.2482
BERNOULLI	Urban100	img_074_SRF_2_HR	160	0.929165	29.4437
BERNOULLI	Urban100	img_074_SRF_2_HR	170	0.917343	28.6759
BERNOULLI	Urban100	img_074_SRF_2_HR	180	0.899674	27.8779
BERNOULLI	Urban100	img_074_SRF_2_HR	190	0.880643	27.2533
BERNOULLI	Urban100	img_074_SRF_2_HR	200	0.851719	26.3329
BERNOULLI	Urban100	img_074_SRF_2_HR	210	0.815008	25.5095
BERNOULLI	Urban100	img_074_SRF_2_HR	220	0.756095	24.3723
BERNOULLI	Urban100	img_074_SRF_2_HR	230	0.684755	23.4726
BERNOULLI	Urban100	img_074_SRF_2_HR	240	0.603945	22.2443
BERNOULLI	Urban100	img_021_SRF_2_HR	150	0.936141	33.8089
BERNOULLI	Urban100	img_021_SRF_2_HR	160	0.929271	33.136
BERNOULLI	Urban100	img_021_SRF_2_HR	170	0.918519	32.1853
BERNOULLI	Urban100	img_021_SRF_2_HR	180	0.909079	31.4228
BERNOULLI	Urban100	img_021_SRF_2_HR	190	0.89668	30.4711
BERNOULLI	Urban100	img_021_SRF_2_HR	200	0.880393	29.5173
BERNOULLI	Urban100	img_021_SRF_2_HR	210	0.862058	28.5795
BERNOULLI	Urban100	img_021_SRF_2_HR	220	0.837063	27.4881
BERNOULLI	Urban100	img_021_SRF_2_HR	230	0.795749	26.0014
BERNOULLI	Urban100	img_021_SRF_2_HR	240	0.726018	24.1515
BERNOULLI	Urban100	img_061_SRF_2_HR	150	0.933043	28.439
BERNOULLI	Urban100	img_061_SRF_2_HR	160	0.919475	27.8781
BERNOULLI	Urban100	img_061_SRF_2_HR	170	0.907891	27.2988
BERNOULLI	Urban100	img_061_SRF_2_HR	180	0.888427	26.3955
BERNOULLI	Urban100	img_061_SRF_2_HR	190	0.865537	25.5735
BERNOULLI	Urban100	img_061_SRF_2_HR	200	0.842365	24.9211
BERNOULLI	Urban100	img_061_SRF_2_HR	210	0.80954	24.0009
BERNOULLI	Urban100	img_061_SRF_2_HR	220	0.769754	23.1642
BERNOULLI	Urban100	img_061_SRF_2_HR	230	0.706914	21.9115
BERNOULLI	Urban100	img_061_SRF_2_HR	240	0.616137	20.7401
BERNOULLI	Urban100	img_034_SRF_2_HR	150	0.877221	26.6132
BERNOULLI	Urban100	img_034_SRF_2_HR	160	0.861079	26.0289
BERNOULLI	Urban100	img_034_SRF_2_HR	170	0.846334	25.516
BERNOULLI	Urban100	img_034_SRF_2_HR	180	0.823908	24.7754
BERNOULLI	Urban100	img_034_SRF_2_HR	190	0.798438	24.1218
BERNOULLI	Urban100	img_034_SRF_2_HR	200	0.76924	23.3351
BERNOULLI	Urban100	img_034_SRF_2_HR	210	0.736762	22.5999
BERNOULLI	Urban100	img_034_SRF_2_HR	220	0.6882	21.571
BERNOULLI	Urban100	img_034_SRF_2_HR	230	0.620417	20.2624
BERNOULLI	Urban100	img_034_SRF_2_HR	240	0.539857	19.0656
BERNOULLI	Urban100	img_066_SRF_2_HR	150	0.939922	29.0028
BERNOULLI	Urban100	img_066_SRF_2_HR	160	0.929462	28.364
BERNOULLI	Urban100	img_066_SRF_2_HR	170	0.918206	27.5249
BERNOULLI	Urban100	img_066_SRF_2_HR	180	0.903688	26.934
BERNOULLI	Urban100	img_066_SRF_2_HR	190	0.885917	26.1194
BERNOULLI	Urban100	img_066_SRF_2_HR	200	0.865372	25.5221
BERNOULLI	Urban100	img_066_SRF_2_HR	210	0.836148	24.5056
BERNOULLI	Urban100	img_066_SRF_2_HR	220	0.799514	23.6378
BERNOULLI	Urban100	img_066_SRF_2_HR	230	0.742884	22.4585
BERNOULLI	Urban100	img_066_SRF_2_HR	240	0.665053	21.2903
BERNOULLI	Urban100	img_033_SRF_2_HR	150	0.952337	33.3076
BERNOULLI	Urban100	img_033_SRF_2_HR	160	0.946143	32.7107
BERNOULLI	Urban100	img_033_SRF_2_HR	170	0.936273	31.6789
BERNOULLI	Urban100	img_033_SRF_2_HR	180	0.924133	30.9376
BERNOULLI	Urban100	img_033_SRF_2_HR	190	0.909599	29.9013
BERNOULLI	Urban100	img_033_SRF_2_HR	200	0.894325	29.2427
BERNOULLI	Urban100	img_033_SRF_2_HR	210	0.87338	28.3179
BERNOULLI	Urban100	img_033_SRF_2_HR	220	0.84004	27.0367
BERNOULLI	Urban100	img_033_SRF_2_HR	230	0.782992	25.2583
BERNOULLI	Urban100	img_033_SRF_2_HR	240	0.702664	23.4673
BERNOULLI	Urban100	img_099_SRF_2_HR	150	0.820854	10.6299
BERNOULLI	Urban100	img_099_SRF_2_HR	160	0.811668	10.6881
BERNOULLI	Urban100	img_099_SRF_2_HR	170	0.798853	10.6538
BERNOULLI	Urban100	img_099_SRF_2_HR	180	0.784789	10.7396
BERNOULLI	Urban100	img_099_SRF_2_HR	190	0.764522	10.8152
BERNOULLI	Urban100	img_099_SRF_2_HR	200	0.739705	10.6015
BERNOULLI	Urban100	img_099_SRF_2_HR	210	0.690512	10.4227
BERNOULLI	Urban100	img_099_SRF_2_HR	220	0.633482	10.3115
BERNOULLI	Urban100	img_099_SRF_2_HR	230	0.541777	9.9113
BERNOULLI	Urban100	img_099_SRF_2_HR	240	0.439959	9.99884
BERNOULLI	Urban100	img_050_SRF_2_HR	150	0.9271	27.3064
BERNOULLI	Urban100	img_050_SRF_2_HR	160	0.917169	26.6236
BERNOULLI	Urban100	img_050_SRF_2_HR	170	0.903582	26.0717
BERNOULLI	Urban100	img_050_SRF_2_HR	180	0.887284	25.4068
BERNOULLI	Urban100	img_050_SRF_2_HR	190	0.867641	24.8131
BERNOULLI	Urban100	img_050_SRF_2_HR	200	0.842617	24.0571
BERNOULLI	Urban100	img_050_SRF_2_HR	210	0.817261	23.3859
BERNOULLI	Urban100	img_050_SRF_2_HR	220	0.776602	22.7288
BERNOULLI	Urban100	img_050_SRF_2_HR	230	0.719987	21.6604
BERNOULLI	Urban100	img_050_SRF_2_HR	240	0.634556	20.6143
BERNOULLI	Urban100	img_005_SRF_2_HR	150	0.968894	27.3114
BERNOULLI	Urban100	img_005_SRF_2_HR	160	0.966013	26.9077
BERNOULLI	Urban100	img_005_SRF_2_HR	170	0.960024	26.069
BERNOULLI	Urban100	img_005_SRF_2_HR	180	0.955369	25.7134
BERNOULLI	Urban100	img_005_SRF_2_HR	190	0.948976	25.0824
BERNOULLI	Urban100	img_005_SRF_2_HR	200	0.940396	24.3141
BERNOULLI	Urban100	img_005_SRF_2_HR	210	0.924521	23.2057
BERNOULLI	Urban100	img_005_SRF_2_HR	220	0.90151	21.9303
BERNOULLI	Urban100	img_005_SRF_2_HR	230	0.863988	20.5314
BERNOULLI	Urban100	img_005_SRF_2_HR	240	0.796002	18.7506
BERNOULLI	Urban100	img_057_SRF_2_HR	150	0.968391	32.1162
BERNOULLI	Urban100	img_057_SRF_2_HR	160	0.959057	30.7598
BERNOULLI	Urban100	img_057_SRF_2_HR	170	0.950664	30.0238
BERNOULLI	Urban100	img_057_SRF_2_HR	180	0.940177	28.9993
BERNOULLI	Urban100	img_057_SRF_2_HR	190	0.922861	27.6106
BERNOULLI	Urban100	img_057_SRF_2_HR	200	0.901875	26.5771
BERNOULLI	Urban100	img_057_SRF_2_HR	210	0.873634	25.0155
BERNOULLI	Urban100	img_057_SRF_2_HR	220	0.837413	23.7632
BERNOULLI	Urban100	img_057_SRF_2_HR	230	0.784258	22.4355
BERNOULLI	Urban100	img_057_SRF_2_HR	240	0.70204	20.6929
BERNOULLI	Urban100	img_002_SRF_2_HR	150	0.971576	31.2623
BERNOULLI	Urban100	img_002_SRF_2_HR	160	0.966277	30.3944
BERNOULLI	Urban100	img_002_SRF_2_HR	170	0.958541	29.6218
BERNOULLI	Urban100	img_002_SRF_2_HR	180	0.94859	28.785
BERNOULLI	Urban100	img_002_SRF_2_HR	190	0.938058	28.136
BERNOULLI	Urban100	img_002_SRF_2_HR	200	0.920166	27.0818
BERNOULLI	Urban100	img_002_SRF_2_HR	210	0.898287	26.0656
BERNOULLI	Urban100	img_002_SRF_2_HR	220	0.857794	24.6823
BERNOULLI	Urban100	img_002_SRF_2_HR	230	0.813139	23.5584
BERNOULLI	Urban100	img_002_SRF_2_HR	240	0.71757	21.4336
BERNOULLI	Urban100	img_042_SRF_2_HR	150	0.983899	33.645
BERNOULLI	Urban100	img_042_SRF_2_HR	160	0.980974	32.8221
BERNOULLI	Urban100	img_042_SRF_2_HR	170	0.975582	31.6265
BERNOULLI	Urban100	img_042_SRF_2_HR	180	0.9699	30.5596
BERNOULLI	Urban100	img_042_SRF_2_HR	190	0.96273	29.4387
BERNOULLI	Urban100	img_042_SRF_2_HR	200	0.949088	27.7642
BERNOULLI	Urban100	img_042_SRF_2_HR	210	0.92915	26.2453
BERNOULLI	Urban100	img_042_SRF_2_HR	220	0.907837	25.0139
BERNOULLI	Urban100	img_042_SRF_2_HR	230	0.855644	22.8695
BERNOULLI	Urban100	img_042_SRF_2_HR	240	0.771669	20.615
BERNOULLI	Urban100	img_017_SRF_2_HR	150	0.964127	29.8061
BERNOULLI	Urban100	img_017_SRF_2_HR	160	0.955169	28.8759
BERNOULLI	Urban100	img_017_SRF_2_HR	170	0.9472	28.0512
BERNOULLI	Urban100	img_017_SRF_2_HR	180	0.934337	27.1645
BERNOULLI	Urban100	img_017_SRF_2_HR	190	0.920055	26.3095
BERNOULLI	Urban100	img_017_SRF_2_HR	200	0.901038	25.4287
BERNOULLI	Urban100	img_017_SRF_2_HR	210	0.873772	24.409
BERNOULLI	Urban100	img_017_SRF_2_HR	220	0.838341	23.2292
BERNOULLI	Urban100	img_017_SRF_2_HR	230	0.788973	22.0002
BERNOULLI	Urban100	img_017_SRF_2_HR	240	0.704414	20.2879
BERNOULLI	Urban100	img_045_SRF_2_HR	150	0.986494	30.2179
BERNOULLI	Urban100	img_045_SRF_2_HR	160	0.984114	29.6657
BERNOULLI	Urban100	img_045_SRF_2_HR	170	0.981952	29.5347
BERNOULLI	Urban100	img_045_SRF_2_HR	180	0.978424	29.3424
BERNOULLI	Urban100	img_045_SRF_2_HR	190	0.974632	29.2693
BERNOULLI	Urban100	img_045_SRF_2_HR	200	0.966696	28.6022
BERNOULLI	Urban100	img_045_SRF_2_HR	210	0.949509	27.1034
BERNOULLI	Urban100	img_045_SRF_2_HR	220	0.922066	25.6818
BERNOULLI	Urban100	img_045_SRF_2_HR	230	0.865487	23.5442
BERNOULLI	Urban100	img_045_SRF_2_HR	240	0.732471	20.8198
BERNOULLI	Urban100	img_010_SRF_2_HR	150	0.976807	35.3827
BERNOULLI	Urban100	img_010_SRF_2_HR	160	0.972432	34.4623
BERNOULLI	Urban100	img_010_SRF_2_HR	170	0.967406	33.632
BERNOULLI	Urban100	img_010_SRF_2_HR	180	0.961469	32.6901
BERNOULLI	Urban100	img_010_SRF_2_HR	190	0.952161	31.4501
BERNOULLI	Urban100	img_010_SRF_2_HR	200	0.936696	29.6382
BERNOULLI	Urban100	img_010_SRF_2_HR	210	0.921088	28.5859
BERNOULLI	Urban100	img_010_SRF_2_HR	220	0.893458	26.8622
BERNOULLI	Urban100	img_010_SRF_2_HR	230	0.846825	24.9087
BERNOULLI	Urban100	img_010_SRF_2_HR	240	0.779963	22.9188
BERNOULLI	Urban100	img_098_SRF_2_HR	150	0.864734	25.5832
BERNOULLI	Urban100	img_098_SRF_2_HR	160	0.848798	25.2734
BERNOULLI	Urban100	img_098_SRF_2_HR	170	0.828251	24.7956
BERNOULLI	Urban100	img_098_SRF_2_HR	180	0.799863	24.0799
BERNOULLI	Urban100	img_098_SRF_2_HR	190	0.774702	23.5587
BERNOULLI	Urban100	img_098_SRF_2_HR	200	0.737797	22.77
BERNOULLI	Urban100	img_098_SRF_2_HR	210	0.692494	22.1337
BERNOULLI	Urban100	img_098_SRF_2_HR	220	0.63491	21.2813
BERNOULLI	Urban100	img_098_SRF_2_HR	230	0.564638	20.4607
BERNOULLI	Urban100	img_098_SRF_2_HR	240	0.457884	19.3535
BERNOULLI	Urban100	img_032_SRF_2_HR	150	0.965401	34.2328
BERNOULLI	Urban100	img_032_SRF_2_HR	160	0.959989	33.721
BERNOULLI	Urban100	img_032_SRF_2_HR	170	0.953506	33.1089
BERNOULLI	Urban100	img_032_SRF_2_HR	180	0.946428	32.5063
BERNOULLI	Urban100	img_032_SRF_2_HR	190	0.937529	31.4799
BERNOULLI	Urban100	img_032_SRF_2_HR	200	0.919172	30.4514
BERNOULLI	Urban100	img_032_SRF_2_HR	210	0.899995	29.4043
BERNOULLI	Urban100	img_032_SRF_2_HR	220	0.854295	27.8509
BERNOULLI	Urban100	img_032_SRF_2_HR	230	0.80342	26.6665
BERNOULLI	Urban100	img_032_SRF_2_HR	240	0.731973	24.3688
BERNOULLI	Urban100	img_067_SRF_2_HR	150	0.884932	19.3706
BERNOULLI	Urban100	img_067_SRF_2_HR	160	0.881184	19.3509
BERNOULLI	Urban100	img_067_SRF_2_HR	170	0.881694	19.3057
BERNOULLI	Urban100	img_067_SRF_2_HR	180	0.876117	19.1858
BERNOULLI	Urban100	img_067_SRF_2_HR	190	0.870485	18.8907
BERNOULLI	Urban100	img_067_SRF_2_HR	200	0.860002	18.6171
BERNOULLI	Urban100	img_067_SRF_2_HR	210	0.841223	17.9586
BERNOULLI	Urban100	img_067_SRF_2_HR	220	0.818377	17.4321
BERNOULLI	Urban100	img_067_SRF_2_HR	230	0.761166	16.1831
BERNOULLI	Urban100	img_067_SRF_2_HR	240	0.664975	14.6264
BERNOULLI	Urban100	img_035_SRF_2_HR	150	0.978045	29.3459
BERNOULLI	Urban100	img_035_SRF_2_HR	160	0.975614	28.8825
BERNOULLI	Urban100	img_035_SRF_2_HR	170	0.969641	27.7892
BERNOULLI	Urban100	img_035_SRF_2_HR	180	0.963862	27.2011
BERNOULLI	Urban100	img_035_SRF_2_HR	190	0.953104	26.1197
BERNOULLI	Urban100	img_035_SRF_2_HR	200	0.942612	26.0751
BERNOULLI	Urban100	img_035_SRF_2_HR	210	0.926951	25.5485
BERNOULLI	Urban100	img_035_SRF_2_HR	220	0.902956	24.521
BERNOULLI	Urban100	img_035_SRF_2_HR	230	0.85306	23.0594
BERNOULLI	Urban100	img_035_SRF_2_HR	240	0.771391	21.6607
BERNOULLI	Urban100	img_060_SRF_2_HR	150	0.924662	28.8913
BERNOULLI	Urban100	img_060_SRF_2_HR	160	0.912641	28.1305
BERNOULLI	Urban100	img_060_SRF_2_HR	170	0.897604	27.5
BERNOULLI	Urban100	img_060_SRF_2_HR	180	0.882611	26.6889
BERNOULLI	Urban100	img_060_SRF_2_HR	190	0.860598	26.0736
BERNOULLI	Urban100	img_060_SRF_2_HR	200	0.83391	25.2682
BERNOULLI	Urban100	img_060_SRF_2_HR	210	0.795315	24.2767
BERNOULLI	Urban100	img_060_SRF_2_HR	220	0.750945	23.4029
BERNOULLI	Urban100	img_060_SRF_2_HR	230	0.694325	22.3704
BERNOULLI	Urban100	img_060_SRF_2_HR	240	0.581469	20.6899
BERNOULLI	Urban100	img_020_SRF_2_HR	150	0.910435	24.7437
BERNOULLI	Urban100	img_020_SRF_2_HR	160	0.895691	24.0786
BERNOULLI	Urban100	img_020_SRF_2_HR	170	0.879251	23.4525
BERNOULLI	Urban100	img_020_SRF_2_HR	180	0.857847	22.7399
BERNOULLI	Urban100	img_020_SRF_2_HR	190	0.831299	22.0428
BERNOULLI	Urban100	img_020_SRF_2_HR	200	0.804909	21.3904
BERNOULLI	Urban100	img_020_SRF_2_HR	210	0.766195	20.6191
BERNOULLI	Urban100	img_020_SRF_2_HR	220	0.715066	19.7116
BERNOULLI	Urban100	img_020_SRF_2_HR	230	0.658846	19.0186
BERNOULLI	Urban100	img_020_SRF_2_HR	240	0.570158	17.8981
BERNOULLI	Urban100	img_075_SRF_2_HR	150	0.976711	37.4935
BERNOULLI	Urban100	img_075_SRF_2_HR	160	0.973523	36.1864
BERNOULLI	Urban100	img_075_SRF_2_HR	170	0.968292	35.169
BERNOULLI	Urban100	img_075_SRF_2_HR	180	0.962369	33.9906
BERNOULLI	Urban100	img_075_SRF_2_HR	190	0.954217	32.5541
BERNOULLI	Urban100	img_075_SRF_2_HR	200	0.945481	31.6001
BERNOULLI	Urban100	img_075_SRF_2_HR	210	0.930072	29.6077
BERNOULLI	Urban100	img_075_SRF_2_HR	220	0.91049	28.3842
BERNOULLI	Urban100	img_075_SRF_2_HR	230	0.881307	26.2841
BERNOULLI	Urban100	img_075_SRF_2_HR	240	0.820583	23.675
BERNOULLI	Urban100	img_027_SRF_2_HR	150	0.964569	34.5526
BERNOULLI	Urban100	img_027_SRF_2_HR	160	0.958824	33.8154
BERNOULLI	Urban100	img_027_SRF_2_HR	170	0.952893	33.1883
BERNOULLI	Urban100	img_027_SRF_2_HR	180	0.944186	32.3501
BERNOULLI	Urban100	img_027_SRF_2_HR	190	0.934649	31.7203
BERNOULLI	Urban100	img_027_SRF_2_HR	200	0.922674	30.8742
BERNOULLI	Urban100	img_027_SRF_2_HR	210	0.907736	30.0022
BERNOULLI	Urban100	img_027_SRF_2_HR	220	0.880922	28.6329
BERNOULLI	Urban100	img_027_SRF_2_HR	230	0.846838	27.3153
BERNOULLI	Urban100	img_027_SRF_2_HR	240	0.782498	25.5109
BERNOULLI	Urban100	img_072_SRF_2_HR	150	0.954313	22.7346
BERNOULLI	Urban100	img_072_SRF_2_HR	160	0.946407	22.1452
BERNOULLI	Urban100	img_072_SRF_2_HR	170	0.936747	21.452
BERNOULLI	Urban100	img_072_SRF_2_HR	180	0.921602	20.6084
BERNOULLI	Urban100	img_072_SRF_2_HR	190	0.90034	19.5974
BERNOULLI	Urban100	img_072_SRF_2_HR	200	0.876983	18.6928
BERNOULLI	Urban100	img_072_SRF_2_HR	210	0.835328	17.4466
BERNOULLI	Urban100	img_072_SRF_2_HR	220	0.790509	16.3991
BERNOULLI	Urban100	img_072_SRF_2_HR	230	0.696126	14.7103
BERNOULLI	Urban100	img_072_SRF_2_HR	240	0.541391	12.8201
BERNOULLI	Urban100	img_011_SRF_2_HR	150	0.888555	17.5621
BERNOULLI	Urban100	img_011_SRF_2_HR	160	0.88617	17.4837
BERNOULLI	Urban100	img_011_SRF_2_HR	170	0.8815	17.4543
BERNOULLI	Urban100	img_011_SRF_2_HR	180	0.876485	17.2777
BERNOULLI	Urban100	img_011_SRF_2_HR	190	0.872255	17.241
BERNOULLI	Urban100	img_011_SRF_2_HR	200	0.857382	16.8572
BERNOULLI	Urban100	img_011_SRF_2_HR	210	0.848151	16.6494
BERNOULLI	Urban100	img_011_SRF_2_HR	220	0.824411	16.1811
BERNOULLI	Urban100	img_011_SRF_2_HR	230	0.785596	15.4215
BERNOULLI	Urban100	img_011_SRF_2_HR	240	0.727396	14.9294
BERNOULLI	Urban100	img_044_SRF_2_HR	150	0.990672	38.5879
BERNOULLI	Urban100	img_044_SRF_2_HR	160	0.987769	37.3203
BERNOULLI	Urban100	img_044_SRF_2_HR	170	0.98484	36.2204
BERNOULLI	Urban100	img_044_SRF_2_HR	180	0.980775	35.0656
BERNOULLI	Urban100	img_044_SRF_2_HR	190	0.973555	33.7452
BERNOULLI	Urban100	img_044_SRF_2_HR	200	0.963488	32.115
BERNOULLI	Urban100	img_044_SRF_2_HR	210	0.947461	30.6012
BERNOULLI	Urban100	img_044_SRF_2_HR	220	0.917839	28.5766
BERNOULLI	Urban100	img_044_SRF_2_HR	230	0.851429	26.0453
BERNOULLI	Urban100	img_044_SRF_2_HR	240	0.712449	23.5036
BERNOULLI	Urban100	img_016_SRF_2_HR	150	0.66637	5.89143
BERNOULLI	Urban100	img_016_SRF_2_HR	160	0.663882	5.91569
BERNOULLI	Urban100	img_016_SRF_2_HR	170	0.660816	5.94356
BERNOULLI	Urban100	img_016_SRF_2_HR	180	0.659342	5.98646
BERNOULLI	Urban100	img_016_SRF_2_HR	190	0.656228	6.01962
BERNOULLI	Urban100	img_016_SRF_2_HR	200	0.651985	6.05147
BERNOULLI	Urban100	img_016_SRF_2_HR	210	0.645942	6.09598
BERNOULLI	Urban100	img_016_SRF_2_HR	220	0.63806	6.155
BERNOULLI	Urban100	img_016_SRF_2_HR	230	0.619051	6.20218
BERNOULLI	Urban100	img_016_SRF_2_HR	240	0.576214	6.62958
BERNOULLI	Urban100	img_043_SRF_2_HR	150	0.933609	21.8657
BERNOULLI	Urban100	img_043_SRF_2_HR	160	0.933949	22.2974
BERNOULLI	Urban100	img_043_SRF_2_HR	170	0.936291	22.4673
BERNOULLI	Urban100	img_043_SRF_2_HR	180	0.932437	22.2943
BERNOULLI	Urban100	img_043_SRF_2_HR	190	0.924232	22.0445
BERNOULLI	Urban100	img_043_SRF_2_HR	200	0.924255	22.4993
BERNOULLI	Urban100	img_043_SRF_2_HR	210	0.91308	22.2697
BERNOULLI	Urban100	img_043_SRF_2_HR	220	0.893388	21.3461
BERNOULLI	Urban100	img_043_SRF_2_HR	230	0.863101	20.602
BERNOULLI	Urban100	img_043_SRF_2_HR	240	0.785257	17.8443
BERNOULLI	Urban100	img_003_SRF_2_HR	150	0.916601	28.3672
BERNOULLI	Urban100	img_003_SRF_2_HR	160	0.904712	27.7004
BERNOULLI	Urban100	img_003_SRF_2_HR	170	0.890349	27.0435
BERNOULLI	Urban100	img_003_SRF_2_HR	180	0.868562	26.2077
BERNOULLI	Urban100	img_003_SRF_2_HR	190	0.851561	25.6006
BERNOULLI	Urban100	img_003_SRF_2_HR	200	0.826303	24.9694
BERNOULLI	Urban100	img_003_SRF_2_HR	210	0.793371	24.0192
BERNOULLI	Urban100	img_003_SRF_2_HR	220	0.739214	22.9538
BERNOULLI	Urban100	img_003_SRF_2_HR	230	0.67615	21.833
BERNOULLI	Urban100	img_003_SRF_2_HR	240	0.572078	20.2278
BERNOULLI	Urban100	img_056_SRF_2_HR	150	0.953098	28.9524
BERNOULLI	Urban100	img_056_SRF_2_HR	160	0.942818	28.091
BERNOULLI	Urban100	img_056_SRF_2_HR	170	0.930901	27.2187
BERNOULLI	Urban100	img_056_SRF_2_HR	180	0.91466	26.3398
BERNOULLI	Urban100	img_056_SRF_2_HR	190	0.899058	25.5678
BERNOULLI	Urban100	img_056_SRF_2_HR	200	0.873217	24.6537
BERNOULLI	Urban100	img_056_SRF_2_HR	210	0.844078	23.7536
BERNOULLI	Urban100	img_056_SRF_2_HR	220	0.792743	22.4395
BERNOULLI	Urban100	img_056_SRF_2_HR	230	0.72594	21.1487
BERNOULLI	Urban100	img_056_SRF_2_HR	240	0.615403	19.6088
BERNOULLI	Urban100	img_004_SRF_2_HR	150	0.890289	20.9363
BERNOULLI	Urban100	img_004_SRF_2_HR	160	0.891245	21.2908
BERNOULLI	Urban100	img_004_SRF_2_HR	170	0.87906	21.0105
BERNOULLI	Urban100	img_004_SRF_2_HR	180	0.867534	20.8267
BERNOULLI	Urban100	img_004_SRF_2_HR	190	0.853846	20.6251
BERNOULLI	Urban100	img_004_SRF_2_HR	200	0.837659	20.4333
BERNOULLI	Urban100	img_004_SRF_2_HR	210	0.80194	19.6568
BERNOULLI	Urban100	img_004_SRF_2_HR	220	0.739174	18.5534
BERNOULLI	Urban100	img_004_SRF_2_HR	230	0.667624	17.6687
BERNOULLI	Urban100	img_004_SRF_2_HR	240	0.530126	16.4037
BERNOULLI	Urban100	img_051_SRF_2_HR	150	0.956735	30.1057
BERNOULLI	Urban100	img_051_SRF_2_HR	160	0.949593	29.4608
BERNOULLI	Urban100	img_051_SRF_2_HR	170	0.940547	28.7746
BERNOULLI	Urban100	img_051_SRF_2_HR	180	0.929713	28.049
BERNOULLI	Urban100	img_051_SRF_2_HR	190	0.916646	27.1344
BERNOULLI	Urban100	img_051_SRF_2_HR	200	0.898623	26.3949
BERNOULLI	Urban100	img_051_SRF_2_HR	210	0.875972	25.5405
BERNOULLI	Urban100	img_051_SRF_2_HR	220	0.839537	24.3941
BERNOULLI	Urban100	img_051_SRF_2_HR	230	0.791959	23.2802
BERNOULLI	Urban100	img_051_SRF_2_HR	240	0.711697	21.7344
BERNOULLI	Urban100	img_009_SRF_2_HR	150	0.986844	40.2452
BERNOULLI	Urban100	img_009_SRF_2_HR	160	0.983814	37.2705
BERNOULLI	Urban100	img_009_SRF_2_HR	170	0.981937	37.7606
BERNOULLI	Urban100	img_009_SRF_2_HR	180	0.979902	37.215
BERNOULLI	Urban100	img_009_SRF_2_HR	190	0.974652	35.6359
BERNOULLI	Urban100	img_009_SRF_2_HR	200	0.970754	34.6384
BERNOULLI	Urban100	img_009_SRF_2_HR	210	0.966853	34.9729
BERNOULLI	Urban100	img_009_SRF_2_HR	220	0.954169	33.207
BERNOULLI	Urban100	img_009_SRF_2_HR	230	0.936703	31.6524
BERNOULLI	Urban100	img_009_SRF_2_HR	240	0.885611	28.8782
BERNOULLI	Urban100	img_049_SRF_2_HR	150	0.936829	24.3165
BERNOULLI	Urban100	img_049_SRF_2_HR	160	0.924722	23.6724
BERNOULLI	Urban100	img_049_SRF_2_HR	170	0.913733	23.2476
BERNOULLI	Urban100	img_049_SRF_2_HR	180	0.897509	22.4914
BERNOULLI	Urban100	img_049_SRF_2_HR	190	0.878005	21.9254
BERNOULLI	Urban100	img_049_SRF_2_HR	200	0.855978	21.1656
BERNOULLI	Urban100	img_049_SRF_2_HR	210	0.823038	20.4466
BERNOULLI	Urban100	img_049_SRF_2_HR	220	0.776733	19.5017
BERNOULLI	Urban100	img_049_SRF_2_HR	230	0.709686	18.4818
BERNOULLI	Urban100	img_049_SRF_2_HR	240	0.583487	16.6786
BERNOULLI	Urban100	img_078_SRF_2_HR	150	0.915439	28.0183
BERNOULLI	Urban100	img_078_SRF_2_HR	160	0.90957	28.5922
BERNOULLI	Urban100	img_078_SRF_2_HR	170	0.895761	27.7076
BERNOULLI	Urban100	img_078_SRF_2_HR	180	0.880608	27.5226
BERNOULLI	Urban100	img_078_SRF_2_HR	190	0.864954	27.2625
BERNOULLI	Urban100	img_078_SRF_2_HR	200	0.835452	26.4118
BERNOULLI	Urban100	img_078_SRF_2_HR	210	0.806265	25.6293
BERNOULLI	Urban100	img_078_SRF_2_HR	220	0.770358	25.068
BERNOULLI	Urban100	img_078_SRF_2_HR	230	0.716947	24.1521
BERNOULLI	Urban100	img_078_SRF_2_HR	240	0.635378	23.1015
BERNOULLI	Urban100	img_087_SRF_2_HR	150	0.97757	29.1614
BERNOULLI	Urban100	img_087_SRF_2_HR	160	0.975131	29.1821
BERNOULLI	Urban100	img_087_SRF_2_HR	170	0.97129	28.6756
BERNOULLI	Urban100	img_087_SRF_2_HR	180	0.966298	28.4029
BERNOULLI	Urban100	img_087_SRF_2_HR	190	0.958854	28.0297
BERNOULLI	Urban100	img_087_SRF_2_HR	200	0.949559	27.549
BERNOULLI	Urban100	img_087_SRF_2_HR	210	0.931609	26.313
BERNOULLI	Urban100	img_087_SRF_2_HR	220	0.900046	24.8625
BERNOULLI	Urban100	img_087_SRF_2_HR	230	0.859453	23.2577
BERNOULLI	Urban100	img_087_SRF_2_HR	240	0.774737	21.1188
BERNOULLI	Urban100	img_080_SRF_2_HR	150	0.984427	39.5607
BERNOULLI	Urban100	img_080_SRF_2_HR	160	0.982313	38.9968
BERNOULLI	Urban100	img_080_SRF_2_HR	170	0.979368	38.112
BERNOULLI	Urban100	img_080_SRF_2_HR	180	0.974312	37.0271
BERNOULLI	Urban100	img_080_SRF_2_HR	190	0.968845	36.0154
BERNOULLI	Urban100	img_080_SRF_2_HR	200	0.960949	34.5177
BERNOULLI	Urban100	img_080_SRF_2_HR	210	0.95121	33.5057
BERNOULLI	Urban100	img_080_SRF_2_HR	220	0.936137	32.2894
BERNOULLI	Urban100	img_080_SRF_2_HR	230	0.911869	30.7724
BERNOULLI	Urban100	img_080_SRF_2_HR	240	0.870305	28.8269
BERNOULLI	Urban100	img_095_SRF_2_HR	150	0.863452	26.069
BERNOULLI	Urban100	img_095_SRF_2_HR	160	0.84463	25.4372
BERNOULLI	Urban100	img_095_SRF_2_HR	170	0.818917	24.8913
BERNOULLI	Urban100	img_095_SRF_2_HR	180	0.792559	24.2877
BERNOULLI	Urban100	img_095_SRF_2_HR	190	0.757482	23.6037
BERNOULLI	Urban100	img_095_SRF_2_HR	200	0.713446	22.8817
BERNOULLI	Urban100	img_095_SRF_2_HR	210	0.658938	22.1816
BERNOULLI	Urban100	img_095_SRF_2_HR	220	0.602744	21.3419
BERNOULLI	Urban100	img_095_SRF_2_HR	230	0.524844	20.5006
BERNOULLI	Urban100	img_095_SRF_2_HR	240	0.422244	19.454
BERNOULLI	Urban100	img_038_SRF_2_HR	150	0.929422	32.811
BERNOULLI	Urban100	img_038_SRF_2_HR	160	0.919923	32.401
BERNOULLI	Urban100	img_038_SRF_2_HR	170	0.906489	31.5188
BERNOULLI	Urban100	img_038_SRF_2_HR	180	0.892294	31.0215
BERNOULLI	Urban100	img_038_SRF_2_HR	190	0.872673	30.2439
BERNOULLI	Urban100	img_038_SRF_2_HR	200	0.84768	29.1597
BERNOULLI	Urban100	img_038_SRF_2_HR	210	0.810263	28.4876
BERNOULLI	Urban100	img_038_SRF_2_HR	220	0.766862	27.5897
BERNOULLI	Urban100	img_038_SRF_2_HR	230	0.689876	26.199
BERNOULLI	Urban100	img_038_SRF_2_HR	240	0.556956	24.5516
BERNOULLI	Urban100	img_092_SRF_2_HR	150	0.936464	26.289
BERNOULLI	Urban100	img_092_SRF_2_HR	160	0.929424	25.8179
BERNOULLI	Urban100	img_092_SRF_2_HR	170	0.915792	25.0789
BERNOULLI	Urban100	img_092_SRF_2_HR	180	0.901909	24.4548
BERNOULLI	Urban100	img_092_SRF_2_HR	190	0.883562	23.5119
BERNOULLI	Urban100	img_092_SRF_2_HR	200	0.861018	22.7509
BERNOULLI	Urban100	img_092_SRF_2_HR	210	0.817689	21.3015
BERNOULLI	Urban100	img_092_SRF_2_HR	220	0.770851	20.2469
BERNOULLI	Urban100	img_092_SRF_2_HR	230	0.671933	18.609
BERNOULLI	Urban100	img_092_SRF_2_HR	240	0.542751	16.8828
BERNOULLI	Urban100	img_048_SRF_2_HR	150	0.931185	23.2711
BERNOULLI	Urban100	img_048_SRF_2_HR	160	0.918118	22.537
BERNOULLI	Urban100	img_048_SRF_2_HR	170	0.906754	22.0217
BERNOULLI	Urban100	img_048_SRF_2_HR	180	0.888894	21.2911
BERNOULLI	Urban100	img_048_SRF_2_HR	190	0.869626	20.5959
BERNOULLI	Urban100	img_048_SRF_2_HR	200	0.846493	19.9417
BERNOULLI	Urban100	img_048_SRF_2_HR	210	0.816373	19.2532
BERNOULLI	Urban100	img_048_SRF_2_HR	220	0.775013	18.3131
BERNOULLI	Urban100	img_048_SRF_2_HR	230	0.713215	17.3962
BERNOULLI	Urban100	img_048_SRF_2_HR	240	0.621254	16.1312
BERNOULLI	Urban100	img_008_SRF_2_HR	150	0.927751	26.5899
BERNOULLI	Urban100	img_008_SRF_2_HR	160	0.913793	25.7552
BERNOULLI	Urban100	img_008_SRF_2_HR	170	0.891743	24.7906
BERNOULLI	Urban100	img_008_SRF_2_HR	180	0.870713	23.9863
BERNOULLI	Urban100	img_008_SRF_2_HR	190	0.8421	23.1138
BERNOULLI	Urban100	img_008_SRF_2_HR	200	0.805158	22.2349
BERNOULLI	Urban100	img_008_SRF_2_HR	210	0.761308	21.355
BERNOULLI	Urban100	img_008_SRF_2_HR	220	0.691306	20.2335
BERNOULLI	Urban100	img_008_SRF_2_HR	230	0.597641	19.031
BERNOULLI	Urban100	img_008_SRF_2_HR	240	0.46712	17.8941
BERNOULLI	Urban100	img_093_SRF_2_HR	150	0.972121	30.5503
BERNOULLI	Urban100	img_093_SRF_2_HR	160	0.969549	30.7857
BERNOULLI	Urban100	img_093_SRF_2_HR	170	0.964903	29.9504
BERNOULLI	Urban100	img_093_SRF_2_HR	180	0.958619	28.6597
BERNOULLI	Urban100	img_093_SRF_2_HR	190	0.951203	28.0636
BERNOULLI	Urban100	img_093_SRF_2_HR	200	0.940341	27.3429
BERNOULLI	Urban100	img_093_SRF_2_HR	210	0.923119	25.8825
BERNOULLI	Urban100	img_093_SRF_2_HR	220	0.897913	24.2831
BERNOULLI	Urban100	img_093_SRF_2_HR	230	0.861464	22.3484
BERNOULLI	Urban100	img_093_SRF_2_HR	240	0.794146	20.1448
BERNOULLI	Urban100	img_039_SRF_2_HR	150	0.940221	27.9586
BERNOULLI	Urban100	img_039_SRF_2_HR	160	0.931081	27.4131
BERNOULLI	Urban100	img_039_SRF_2_HR	170	0.91225	26.0979
BERNOULLI	Urban100	img_039_SRF_2_HR	180	0.895134	25.562
BERNOULLI	Urban100	img_039_SRF_2_HR	190	0.867815	24.6655
BERNOULLI	Urban100	img_039_SRF_2_HR	200	0.841568	23.8441
BERNOULLI	Urban100	img_039_SRF_2_HR	210	0.799816	22.7307
BERNOULLI	Urban100	img_039_SRF_2_HR	220	0.746742	21.6733
BERNOULLI	Urban100	img_039_SRF_2_HR	230	0.68087	20.5017
[truncated: 4,937 more rows]
