# Supplementary material for: MPDenoiseNet: Resource-Efficient Deep Learning Approach for Image Denoising
Source: Research Square preprint supplement (doi:10.21203/rs.3.rs-6641644/v1), 2025-05-20
Supplement: Supplementary file 21 [file Restormer vs. MPDenoiseNet Comparison.xlsx]

## Sheet: GAUSSAIN
PSNR																	Sigma	AVG. PSNR		Ours vs. Restormer % diff
GUASSIAN			OUR MODEL				RESTORMER				RESTORMER FULLY TRAINED						15	31.3779	31.0521	0.010491
		Sigma	15	25	50	60	15	25	50	60	15	25	50	60			25	29.0817	28.8701	0.00732668
	Dataset	BSD68	31.2844	29.0518	26.1937	25.5219	27.8836	26.5345	24.2737	23.6922	31.2238	28.933	26.0257	25.3096			50	25.986	25.7556	0.00894561
		Kodak24	32.2698	30.2055	27.4558	26.8144	28.4661	27.4372	25.4019	25.0081	32.3282	30.1163	27.2736	26.5494			60	25.2356	24.9551	0.0112366
		Set12	32.429	30.2284	27.1186	26.3341	31.149	29.1003	26.3814	25.5696	32.548	30.2592	27.0467	26.1339
		Urban100	31.1012	28.6946	25.3561	24.5301	26.092	24.8683	22.8506	22.1513	30.4496	28.3616	25.0527	24.19
		Avg.	31.3779	29.0817	25.986	25.2356	27.266	25.9749	23.8328	23.2021	31.0521	28.8701	25.7556	24.9551
SSIM																	Sigma	AVG. SSIM		Ours vs. Restormer % diff
GUASSIAN			OUR MODEL				Restormer				RESTORMER FULLY TRAINED						15	0.905679	0.9075	-0.00200667
		Sigma	15	25	50	60	15	25	50	60	15	25	50	60			25	0.856569	0.856207	0.000423344
	Dataset	BSD68	0.889254	0.829989	0.719152	0.686889	0.860556	0.79878	0.686191	0.656164	0.889973	0.827654	0.715877	0.682769			50	0.756039	0.750041	0.00799721
		Kodak24	0.886492	0.83274	0.734206	0.707029	0.858105	0.799809	0.700119	0.676674	0.886978	0.829834	0.730721	0.703224			60	0.724235	0.716637	0.0106026
		Set12	0.900112	0.861077	0.782959	0.758319	0.886125	0.839423	0.756026	0.73445	0.901909	0.860496	0.778327	0.751204
		Urban100	0.922121	0.879822	0.783131	0.749669	0.880435	0.831674	0.731443	0.697396	0.925015	0.881438	0.774514	0.738737
		Avg.	0.905679	0.856569	0.756039	0.724235	0.871517	0.817416	0.71412	0.683394	0.9075	0.856207	0.750041	0.716637

## Sheet: BERNOULLI
PSNR																																			Noise Parameter	AVG. PSNR		Ours vs. Restormer % diff
BERNOULLI			OUR MODEL										RESTORMER										RESTORMER FULLY TRAINED												150	30.1028	29.8399	0.00880986
		Noise Parameter	150	160	170	180	190	200	210	220	230	240	150	160	170	180	190	200	210	220	230	240	150	160	170	180	190	200	210	220	230	240			160	29.4763	29.2539	0.00760308
	Dataset	BSD68	30.8271	30.1671	29.5811	28.9218	28.2585	27.5462	26.7816	25.9306	24.8999	23.5758	25.9834	25.7208	25.4326	25.1081	24.7909	24.4367	24.0407	23.5952	22.9834	22.181	30.6848	30.0777	29.4677	28.8121	28.1197	27.4176	26.6648	25.8543	24.8257	23.5667			170	28.8356	28.6477	0.00655719
		Kodak24	30.7841	30.3272	29.8813	29.3873	28.8528	28.2889	27.6112	26.886	25.9317	24.6931	26.3349	26.1833	26.0083	25.7592	25.5353	25.2226	24.8642	24.4718	23.9223	23.1599	30.6713	30.2068	29.771	29.2749	28.7536	28.1913	27.568	26.8236	25.9739	24.8029			180	28.1484	28.0032	0.00518624
		Set12	32.0376	31.3909	30.7959	30.1653	29.3674	28.4853	27.5811	26.6427	25.2527	23.4509	29.0321	28.5514	28.0436	27.4443	26.8363	26.191	25.4678	24.6774	23.7978	22.4657	32.3025	31.6256	30.9122	30.2718	29.4365	28.5656	27.6608	26.559	25.1609	23.529			190	27.4337	27.3077	0.00461469
		Urban100	29.2146	28.5726	27.8424	27.0832	26.3001	25.3993	24.4366	23.3283	21.9749	20.2265	22.8542	22.5836	22.3197	21.9992	21.6615	21.2593	20.8571	20.3605	19.7146	18.7618	28.7703	28.1805	27.5488	26.8757	26.153	25.3387	24.4539	23.3846	22.1026	20.4648			200	26.6364	26.5571	0.00298673
		Avg.	30.1028	29.4763	28.8356	28.1484	27.4337	26.6364	25.7767	24.8093	23.6082	22.0581	24.6702	24.4039	24.128	23.7982	23.4648	23.0748	22.6609	22.1764	21.5394	20.6368	29.8399	29.2539	28.6477	28.0032	27.3077	26.5571	25.7459	24.7992	23.6456	22.1894			210	25.7767	25.7459	0.00119856
																																			220	24.8093	24.7992	0.00040715
																																			230	23.6082	23.6456	-0.00158242
																																			240	22.0581	22.1894	-0.00591818
SSIM																																			Noise Parameter	AVG. SSIM		Ours vs. Restormer % diff
BERNOULLI			OUR MODEL										RESTORMER										RESTORMER FULLY TRAINED												150	0.930398	0.930734	-0.000360551
		Noise Parameter	150	160	170	180	190	200	210	220	230	240	150	160	170	180	190	200	210	220	230	240	150	160	170	180	190	200	210	220	230	240			160	0.920793	0.921473	-0.000737684
	Dataset	BSD68	0.916439	0.904287	0.891236	0.875784	0.857631	0.835775	0.809602	0.775743	0.730734	0.66432	0.8567	0.8443	0.8295	0.8128	0.7934	0.7708	0.7439	0.7116	0.6685	0.6064	0.917102	0.905131	0.891719	0.87604	0.857628	0.835857	0.808479	0.775142	0.729783	0.665943			170	0.909696	0.91044	-0.000817683
		Kodak24	0.930974	0.921364	0.910601	0.897613	0.881916	0.86359	0.840514	0.811018	0.770664	0.710813	0.8669	0.8558	0.8428	0.8274	0.8097	0.7891	0.7651	0.7354	0.6977	0.6426	0.932278	0.922529	0.911078	0.89817	0.882737	0.864428	0.841409	0.812376	0.773111	0.715642			180	0.896408	0.897417	-0.00112343
		Set12	0.94345	0.936731	0.928604	0.918728	0.906394	0.892043	0.872135	0.847656	0.809206	0.747284	0.9032	0.8934	0.8821	0.8686	0.8529	0.8332	0.8112	0.7841	0.7461	0.6823	0.946109	0.938849	0.930667	0.920533	0.908895	0.893864	0.874329	0.847274	0.810453	0.752869			190	0.880259	0.881508	-0.001416
		Urban100	0.938186	0.929968	0.919762	0.907466	0.892113	0.871726	0.845738	0.808243	0.7514	0.656717	0.8439	0.8305	0.8151	0.7965	0.7748	0.749	0.7177	0.6777	0.6244	0.5439	0.937788	0.930247	0.920591	0.908998	0.894164	0.87534	0.849736	0.813484	0.759513	0.671184			200	0.85998	0.861985	-0.00232542
		Avg.	0.930398	0.920793	0.909696	0.896408	0.880259	0.85998	0.834631	0.800055	0.750178	0.670943	0.854389	0.841752	0.827106	0.809839	0.789737	0.765944	0.737483	0.702051	0.654883	0.584482	0.930734	0.921473	0.91044	0.897417	0.881508	0.861985	0.836451	0.80256	0.754199	0.679472			210	0.834631	0.836451	-0.0021757
																																			220	0.800055	0.80256	-0.00312188
																																			230	0.750178	0.754199	-0.00533194
																																			240	0.670943	0.679472	-0.0125524

## Sheet: SALT & PEPPER
PSNR																																			Noise Parameter	AVG. PSNR		Ours vs. Restormer % diff
BERNOULLI			OUR MODEL										RESTORMER										RESTORMER FULLY TRAINED												150	29.8678	29.2726	0.0203323
		Noise Parameter	150	160	170	180	190	200	210	220	230	240	150	160	170	180	190	200	210	220	230	240	150	160	170	180	190	200	210	220	230	240			160	29.2691	28.7123	0.019391
	Dataset	BSD68	30.6745	30.094	29.4813	28.8453	28.1674	27.5005	26.7399	25.8615	24.8827	23.5021	24.7473	24.4492	24.0984	23.7379	23.3863	23.0389	22.7321	22.3864	21.8786	20.842	30.4798	29.875	29.2685	28.6482	28.0168	27.327	26.5577	25.7415	24.7573	23.5002			170	28.6362	28.1041	0.0189344
		Kodak24	29.1686	28.9453	28.7883	28.4483	28.1291	27.7126	27.1467	26.4795	25.6827	24.5137	25.7767	25.5234	25.2354	24.9378	24.5739	24.2839	24.0147	23.6788	23.1529	22.1943	30.1073	29.7703	29.3821	28.9323	28.4826	27.9172	27.3171	26.6197	25.7826	24.668			180	27.9732	27.5226	0.0163693
		Set12	32.0027	31.3684	30.7404	30.0063	29.2112	28.465	27.6253	26.4405	25.1832	23.4479	27.4704	27.041	26.6097	26.0407	25.5185	24.8491	24.1165	23.3226	22.3323	20.964	32.3473	31.63	30.9623	30.1994	29.371	28.6705	27.5791	26.5367	25.1568	23.4649			190	27.2547	26.8702	0.0143058
		Urban100	28.5368	27.9293	27.2944	26.6102	25.872	25.0347	24.1008	23.0457	21.7434	20.0257	21.42	21.1392	20.8431	20.5206	20.2159	19.9177	19.5782	19.061	18.4335	17.4064	27.8824	27.3177	26.6626	26.0977	25.4035	24.6735	23.7288	22.7168	21.5182	19.961			200	26.4916	26.1747	0.0121067
		Avg.	29.8678	29.2691	28.6362	27.9732	27.2547	26.4916	25.6181	24.6459	23.4684	21.9138	23.3976	23.1055	22.7842	22.4374	22.0973	21.7619	21.4184	20.9635	20.3664	19.3242	29.2726	28.7123	28.1041	27.5226	26.8702	26.1747	25.3204	24.4089	23.3136	21.9006			210	25.6181	25.3204	0.011754
																																			220	24.6459	24.4089	0.00970929
																																			230	23.4684	23.3136	0.00663936
																																			240	21.9138	21.9006	0.000603091
SSIM																																			Noise Parameter	AVG. SSIM		Ours vs. Restormer % diff
BERNOULLI			OUR MODEL										RESTORMER										RESTORMER FULLY TRAINED												150	0.92934	0.927811	0.0016489
		Noise Parameter	150	160	170	180	190	200	210	220	230	240	150	160	170	180	190	200	210	220	230	240	150	160	170	180	190	200	210	220	230	240			160	0.919731	0.918229	0.00163571
	Dataset	BSD68	0.915167	0.90369	0.89035	0.874663	0.85611	0.834749	0.807621	0.773412	0.728724	0.661674	0.814364	0.799625	0.782701	0.763567	0.741236	0.716203	0.685758	0.649488	0.599081	0.513714	0.915386	0.903537	0.889899	0.874267	0.855667	0.833093	0.805874	0.772291	0.726801	0.661479			170	0.908463	0.907018	0.00159303
		Kodak24	0.929337	0.919832	0.90856	0.89538	0.879714	0.861324	0.837505	0.807401	0.767563	0.706837	0.829046	0.814804	0.799366	0.781389	0.760941	0.737886	0.710342	0.676023	0.629087	0.548801	0.929408	0.919932	0.90875	0.895219	0.879742	0.860612	0.837461	0.807417	0.76817	0.710059			180	0.894909	0.893836	0.00120003
		Set12	0.943141	0.935807	0.927797	0.917497	0.905272	0.891276	0.872076	0.846216	0.807993	0.746564	0.86999	0.857526	0.843877	0.827593	0.809228	0.785374	0.757914	0.720193	0.662566	0.566581	0.945643	0.937834	0.929852	0.919664	0.90696	0.892673	0.872558	0.845536	0.807899	0.746418			190	0.878494	0.877533	0.0010946
		Urban100	0.937323	0.928685	0.918436	0.905852	0.890208	0.870017	0.842802	0.804671	0.747304	0.65019	0.79209	0.775681	0.757137	0.735926	0.711904	0.682717	0.647448	0.600305	0.538684	0.443765	0.933736	0.925459	0.915503	0.903711	0.888341	0.868397	0.84175	0.805157	0.749793	0.657834			200	0.858489	0.857141	0.00157203
		Avg.	0.92934	0.919731	0.908463	0.894909	0.878494	0.858489	0.832174	0.797016	0.747064	0.666352	0.808445	0.793079	0.775728	0.755881	0.733175	0.706408	0.674115	0.63266	0.576739	0.486663	0.927811	0.918229	0.907018	0.893836	0.877533	0.857141	0.831099	0.796843	0.747709	0.670404			210	0.832174	0.831099	0.0012939
																																			220	0.797016	0.796843	0.000217325
																																			230	0.747064	0.747709	-0.000862321
																																			240	0.666352	0.670404	-0.00604418

## Sheet: POISSON
PSNR																																			Noise Parameter	AVG. PSNR		Ours vs. Restormer % diff
BERNOULLI			OUR MODEL										RESTORMER										RESTORMER FULLY TRAINED												150	31.4767	30.1548	0.0438367
		Noise Parameter	150	160	170	180	190	200	210	220	230	240	150	160	170	180	190	200	210	220	230	240	150	160	170	180	190	200	210	220	230	240			160	31.1907	29.9606	0.0410568
	Dataset	BSD68	31.9482	31.6363	31.4839	31.2967	31.0278	30.8884	30.6458	30.5179	30.3665	30.1054	28.7661	28.6516	28.6194	28.5987	28.4507	28.2505	28.1461	28.0873	27.8485	27.7888	31.8195	31.4924	31.4133	31.1551	30.8918	30.7447	30.6313	30.5044	30.2922	30.1541			170	30.993	29.7907	0.0403598
		Kodak24	33.7589	33.3353	33.1895	32.9444	32.7617	32.5296	32.3896	32.2084	31.9603	31.748	29.6906	29.6996	29.6899	29.6823	29.5938	29.3684	29.4016	29.3419	29.0974	28.9492	29.1882	29.0082	28.9445	28.9206	28.9139	28.7583	28.8396	28.645	28.6997	28.7147			180	30.8337	29.6292	0.0406535
		Set12	34.2577	34.0758	33.7474	33.5517	33.2834	33.0815	32.8131	32.6892	32.35	32.173	29.4924	29.3944	29.3585	29.3854	29.2947	29.0925	29.0256	28.8478	28.6503	28.5746	34.0433	33.8581	33.6159	33.1308	33.0112	32.693	32.5231	32.3027	32.171	31.9645			190	30.5834	29.4542	0.0383372
		Urban100	30.2746	30.0267	29.8015	29.6862	29.4344	29.1203	28.9702	28.7863	28.5736	28.3149	24.181	24.1592	24.212	24.2097	24.3937	24.4318	24.5383	24.5696	24.1989	24.2849	28.7882	28.6799	28.4314	28.3414	28.1795	28.0387	27.8918	27.7678	27.7828	27.6524			200	30.3437	29.2991	0.0356534
		Avg.	31.4767	31.1907	30.993	30.8337	30.5834	30.3437	30.157	29.9957	29.7918	29.5426	26.67	26.6164	26.6284	26.621	26.6461	26.5596	26.577	26.5553	26.2535	26.254	30.1548	29.9606	29.7907	29.6292	29.4542	29.2991	29.1889	29.0499	28.9853	28.8649			210	30.157	29.1889	0.0331681
																																			220	29.9957	29.0499	0.0325553
																																			230	29.7918	28.9853	0.0278255
																																			240	29.5426	28.8649	0.0234761
SSIM																																			Noise Parameter	AVG. SSIM		Ours vs. Restormer % diff
BERNOULLI			OUR MODEL										RESTORMER										RESTORMER FULLY TRAINED												150	0.949095	0.951174	-0.00218591
		Noise Parameter	150	160	170	180	190	200	210	220	230	240	150	160	170	180	190	200	210	220	230	240	150	160	170	180	190	200	210	220	230	240			160	0.945992	0.948179	-0.00230576
	Dataset	BSD68	0.943268	0.939558	0.937128	0.932993	0.930056	0.92599	0.921994	0.918288	0.915082	0.908052	0.885982	0.88093	0.876766	0.871956	0.866574	0.858511	0.85124	0.84543	0.835167	0.828249	0.945983	0.940815	0.938981	0.934119	0.931261	0.927782	0.924463	0.921612	0.919071	0.91614			170	0.943818	0.945894	-0.0021945
		Kodak24	0.964834	0.959296	0.958313	0.954889	0.951305	0.947796	0.945051	0.941309	0.937974	0.930056	0.899778	0.893821	0.889672	0.881697	0.877108	0.868822	0.860682	0.853156	0.840819	0.833798	0.96393	0.960918	0.958959	0.956291	0.954015	0.950762	0.949283	0.945259	0.942428	0.940592			180	0.940765	0.942927	-0.00229247
		Set12	0.974812	0.973707	0.972109	0.970117	0.967797	0.964737	0.963631	0.962547	0.95905	0.956688	0.916926	0.912755	0.909473	0.904532	0.90033	0.892678	0.886702	0.877475	0.868803	0.859476	0.977194	0.976854	0.975073	0.972576	0.971744	0.970007	0.968091	0.966318	0.965195	0.961298			190	0.937204	0.940354	-0.00335023
		Urban100	0.946194	0.943849	0.941493	0.939139	0.935009	0.929924	0.928297	0.923896	0.920937	0.915202	0.867107	0.864838	0.861833	0.858013	0.856374	0.853527	0.849138	0.844591	0.835049	0.828759	0.94852	0.946687	0.943957	0.942151	0.939492	0.937216	0.935183	0.933352	0.930754	0.928448			200	0.932763	0.937594	-0.0051522
		Avg.	0.949095	0.945992	0.943818	0.940765	0.937204	0.932763	0.930245	0.926349	0.923231	0.917007	0.880173	0.87643	0.872888	0.868184	0.864799	0.859291	0.853407	0.847813	0.837753	0.830989	0.951174	0.948179	0.945894	0.942927	0.940354	0.937594	0.935204	0.932779	0.930259	0.927706			210	0.930245	0.935204	-0.00530251
																																			220	0.926349	0.932779	-0.00689289
																																			230	0.923231	0.930259	-0.00755444
																																			240	0.917007	0.927706	-0.0115337

## Sheet: SUMMARY FULLY TRAINED
GUASSIAN	Sigma	AVG. PSNR		Ours vs. Restormer % diff	AVG. SSIM		Ours vs. Restormer % diff
	15	31.3779	31.0521	0.010491	0.905679	0.9075	-0.00200667
	25	29.0817	28.8701	0.00732668	0.856569	0.856207	0.000423344
	50	25.986	25.7556	0.00894561	0.756039	0.750041	0.00799721
	60	25.2356	24.9551	0.0112366	0.724235	0.716637	0.0106026
BERNOULLI	150	30.1028	29.8399	0.00880986	0.930398	0.930734	-0.000360551
	160	29.4763	29.2539	0.00760308	0.920793	0.921473	-0.000737684
	170	28.8356	28.6477	0.00655719	0.909696	0.91044	-0.000817683
	180	28.1484	28.0032	0.00518624	0.896408	0.897417	-0.00112343
	190	27.4337	27.3077	0.00461469	0.880259	0.881508	-0.001416
	200	26.6364	26.5571	0.00298673	0.85998	0.861985	-0.00232542
	210	25.7767	25.7459	0.00119856	0.834631	0.836451	-0.0021757
	220	24.8093	24.7992	0.00040715	0.800055	0.80256	-0.00312188
	230	23.6082	23.6456	-0.00158242	0.750178	0.754199	-0.00533194
	240	22.0581	22.1894	-0.00591818	0.670943	0.679472	-0.0125524
SALT & PEPPER	150	29.8678	29.2726	0.0203323	0.92934	0.927811	0.0016489
	160	29.2691	28.7123	0.019391	0.919731	0.918229	0.00163571
	170	28.6362	28.1041	0.0189344	0.908463	0.907018	0.00159303
	180	27.9732	27.5226	0.0163693	0.894909	0.893836	0.00120003
	190	27.2547	26.8702	0.0143058	0.878494	0.877533	0.0010946
	200	26.4916	26.1747	0.0121067	0.858489	0.857141	0.00157203
	210	25.6181	25.3204	0.011754	0.832174	0.831099	0.0012939
	220	24.6459	24.4089	0.00970929	0.797016	0.796843	0.000217325
	230	23.4684	23.3136	0.00663936	0.747064	0.747709	-0.000862321
	240	21.9138	21.9006	0.000603091	0.666352	0.670404	-0.00604418
POISSON	150	31.4767	30.1548	0.0438367	0.949095	0.951174	-0.00218591
	160	31.1907	29.9606	0.0410568	0.945992	0.948179	-0.00230576
	170	30.993	29.7907	0.0403598	0.943818	0.945894	-0.0021945
	180	30.8337	29.6292	0.0406535	0.940765	0.942927	-0.00229247
	190	30.5834	29.4542	0.0383372	0.937204	0.940354	-0.00335023
	200	30.3437	29.2991	0.0356534	0.932763	0.937594	-0.0051522
	210	30.157	29.1889	0.0331681	0.930245	0.935204	-0.00530251
	220	29.9957	29.0499	0.0325553	0.926349	0.932779	-0.00689289
	230	29.7918	28.9853	0.0278255	0.923231	0.930259	-0.00755444
	240	29.5426	28.8649	0.0234761	0.917007	0.927706	-0.0115337

## Sheet: SUMMARY
GUASSIAN	Sigma	AVG. PSNR		Ours vs. Restormer % diff	AVG. SSIM		Ours vs. Restormer % diff
	15	31.4978	27.266	0.155206	0.90613	0.871517	0.0397167
	25	29.1215	25.9749	0.121143	0.856309	0.817416	0.0475796
	50	26.0208	23.8328	0.0918066	0.757771	0.71412	0.061126
	60	25.2356	23.2021	0.0876416	0.726085	0.683394	0.0624698
BERNOULLI	150	29.9001	24.6702	0.211995	0.92867	0.854389	0.0869411
	160	29.2948	24.4039	0.200416	0.918951	0.841752	0.0917111
	170	28.6796	24.128	0.188643	0.907789	0.827106	0.0975489
	180	28.0135	23.7982	0.177128	0.894358	0.809839	0.104364
	190	27.3162	23.4648	0.164139	0.878037	0.789737	0.11181
	200	26.5367	23.0748	0.150028	0.857499	0.765944	0.119533
	210	25.693	22.6609	0.133803	0.831669	0.737483	0.127714
	220	24.7278	22.1764	0.115051	0.796213	0.702051	0.134124
	230	23.5561	21.5394	0.0936282	0.744982	0.654883	0.137581
	240	22.0168	20.6368	0.0668675	0.663252	0.584482	0.134769
SALT & PEPPER	150	29.53	23.4	0.26	0.9274	0.8084	0.15
	160	28.97	23.11	0.25	0.9177	0.7931	0.16
	170	28.4	22.78	0.25	0.9064	0.7757	0.17
	180	27.77	22.44	0.24	0.8929	0.7559	0.18
	190	27.1	22.1	0.23	0.8763	0.7332	0.2
	200	26.37	21.76	0.21	0.8563	0.7064	0.21
	210	25.55	21.42	0.19	0.8298	0.6741	0.23
	220	24.59	20.96	0.17	0.7942	0.6327	0.26
	230	23.46	20.37	0.15	0.7433	0.5767	0.29
	240	21.91	19.32	0.13	0.661	0.4867	0.358134
POISSON	150	31.8622	26.67	0.194681	0.950471	0.880173	0.0798686
	160	31.5858	26.6164	0.186702	0.947441	0.87643	0.081023
	170	31.3913	26.6284	0.178869	0.945279	0.872888	0.0829323
	180	31.2437	26.621	0.17365	0.942407	0.868184	0.0854921
	190	31.0093	26.6461	0.163747	0.939228	0.864799	0.086065
	200	30.7945	26.5596	0.159447	0.935003	0.859291	0.0881103
	210	30.5744	26.577	0.15041	0.932057	0.853407	0.0921602
	220	30.4868	26.5553	0.14805	0.930232	0.847813	0.0972143
	230	30.2255	26.2535	0.151293	0.926185	0.837753	0.105559
	240	30.0611	26.254	0.145012	0.922312	0.830989	0.109897

## Sheet: OUR MODEL IMPROVEMENT
	Set12						BSD68						Urban100						Kodak24
Sigma	15		25		50		15		25		50		15		25		50		15		25		50
Criterion	PSNR	SSIM	PSNR	SSIM	PSNR	SSIM	PSNR	SSIM	PSNR	SSIM	PSNR	SSIM	PSNR	SSIM	PSNR	SSIM	PSNR	SSIM	PSNR	SSIM	PSNR	SSIM	PSNR	SSIM
Previous Version (April 2024)	31.31	0.882064	29.5	0.847021	26.85	0.778365	30.44	0.874009	28.52	0.824932	26.09	0.7237	30.38	0.89194	28.35	0.854153	25.74	0.779478	31.0998	0.862958	29.2961	0.815542	25.74	0.732024
Last Iteration (April 2025)	32.4294	0.899675	30.2063	0.859595	27.1209	0.782669	31.4364	0.889945	29.0844	0.829933	26.2252	0.722959	31.1869	0.922435	28.7406	0.879618	25.3935	0.783459	32.5016	0.887283	30.2716	0.832274	27.5055	0.736921
Percentage diff	0.0357517	0.0199662	0.0239435	0.0148447	0.0100883	0.00553022	0.032732	0.0182328	0.0197909	0.00606253	0.0051824	-0.0010231	0.0265595	0.0341895	0.0137774	0.0298133	-0.0134607	0.00510735	0.045076	0.0281871	0.0332983	0.0205163	0.0685895	0.00668988
	Set12		BSD68		Urban100		Kodak24
Criterion	PSNR	SSIM	PSNR	SSIM	PSNR	SSIM	PSNR	SSIM
Previous Version (April 2024)	29.22	0.835817	28.35	0.807547	28.1567	0.841857	28.712	0.803508
Last Iteration (April 2025)	29.9189	0.847313	28.9153	0.814279	28.4403	0.861837	30.0929	0.818826
Percentage diff	0.0239173	0.0137549	0.0199413	0.00833651	0.0100744	0.0237337	0.0480968	0.0190636

## Sheet: OUR vs. GAUSS. ONLY RESTORMER
	Set12						BSD68						Urban100						Kodak24
Sigma	15		25		50		15		25		50		15		25		50		15		25		50
Criterion	PSNR	SSIM	PSNR	SSIM	PSNR	SSIM	PSNR	SSIM	PSNR	SSIM	PSNR	SSIM	PSNR	SSIM	PSNR	SSIM	PSNR	SSIM	PSNR	SSIM	PSNR	SSIM	PSNR	SSIM
Restormer Trained on Guassian Noise only	32.8096	0.913582	30.4773	0.876307	27.406	0.81092	31.6847	0.900555	29.3531	0.843567	26.5648	0.743646	31.5154	0.936898	29.8992	0.909449	27.3607	0.853116	31.9193	0.896881	30.1813	0.847191	27.7458	0.76189
OURS Last Iteration (April 2025)	32.4294	0.899675	30.2063	0.859595	27.1209	0.782669	31.4364	0.889945	29.0844	0.829933	26.2252	0.722959	31.1869	0.922435	28.7406	0.879618	25.3935	0.783459	32.5016	0.887283	30.2716	0.832274	27.5055	0.736921
Percentage diff	-0.0115895	-0.015222	-0.00889064	-0.0190706	-0.0104039	-0.034838	-0.00783895	-0.0117821	-0.00915376	-0.0161623	-0.0127829	-0.0278184	-0.0104233	-0.0154378	-0.0387518	-0.0328013	-0.0718982	-0.0816496	0.0182452	-0.0107016	0.00299461	-0.0176082	-0.00866272	-0.0327726
	Set12		BSD68		Urban100		Kodak24
Criterion	PSNR	SSIM	PSNR	SSIM	PSNR	SSIM	PSNR	SSIM
Restormer Trained on Guassian Noise only	30.231	0.866936	29.2009	0.829256	29.5918	0.899821	29.9488	0.835321
OURS Last Iteration (April 2025)	29.9189	0.847313	28.9153	0.814279	28.4403	0.861837	30.0929	0.818826
Percentage diff	-0.0103243	-0.0226349	-0.00977872	-0.0180609	-0.0389109	-0.0422126	0.00481265	-0.0197468

## Sheet: MODEL EFFICIENCY NVIDIA L4 24gb
Image Size	Restormer Time (s) (avg of 1000 runs)	Our Model Time (s) (avg of 1000 runs)	Restormer Memory (bytes)	Our Model Memory (bytes)	OUR MODEL MEMORY USAGE VS RESTORMER	Restormer Throughput (images/s)	Our Model Throughput (images/s)
64	0.0397561	0.0220915	260014080	222801920	0.856884	25.1534	45.2662
128	0.0414557	0.0227536	3.21924e+08	1.42683e+08	0.44322	24.1222	43.9491
256	0.046692	0.024041	545073664	3.22121e+08	0.590969	21.4169	41.5956
512	0.157119	0.0316119	1768987136	1.03725e+09	0.586352	6.3646	31.6337
1024	0.819197	0.0423538	6736091648	3.89855e+09	0.578756	1.22071	23.6106
2048	Not completed, Cuda ran out of memory	0.396431	Not completed, Cuda ran out of memory	15348936704	Not completed, Cuda ran out of memory	Not completed, Cuda ran out of memory	2.5225
4096	Not completed, Cuda ran out of memory	Not completed, Cuda ran out of memory	Not completed, Cuda ran out of memory	Not completed, Cuda ran out of memory	Not completed, Cuda ran out of memory	Not completed, Cuda ran out of memory	Not completed, Cuda ran out of memory
	Restormer Params	Our Model Params
Number of Parameters	26124052	17806062

## Sheet: EFFICIENCY MPS M1 PRO 32gb
Image Size	Restormer Time (s) (avg of 10 runs)	Our Model Time (s) (avg of 10 runs)	Restormer Throughput (images/s)	Our Model Throughput (images/s)
64	0.114485	0.0905053	8.7348	11.0491
128	0.115354	0.0924736	8.66899	10.8139
256	0.26356	0.120418	3.7942	8.30438
512	1.56244	0.544737	0.640025	1.83575
1024	8.95514	2.72112	0.111668	0.367495

[truncated: 1 more sheets: EFFICIENCY CPU M1 PRO 32gb]
